# Supplementary material for: miR-150 Regulates Differentiation and Cytolytic Effector Function in CD8+ T cells
Source: PubMed Central journal article supplement (PMC4637875; doi:10.1038/srep16399), 2015-11-09
Supplement: srep16399-s1.pdf [file srep16399-s1.pdf]

**miR-150 Regulates Differentiation and Cytolytic Effector Function in CD8+  
T cells**

Norah L. Smith<sup>1</sup>, Erin M. Wissink<sup>2</sup>, Andrew Grimson<sup>2,\*</sup> and Brian D. Rudd<sup>1,\*</sup>

Supplemental Information

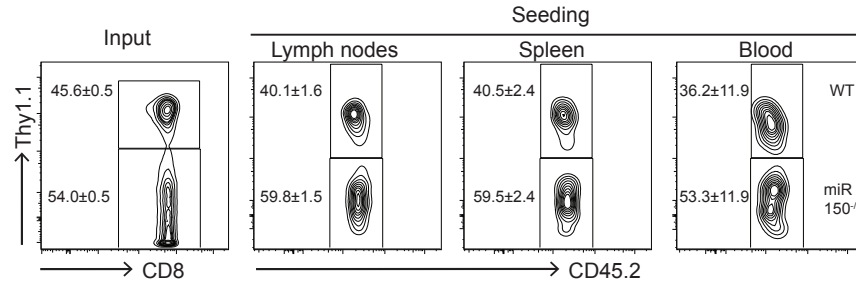

Figure S1. Contour plots with ratio of WT (Thy1.1+) and miR-150<sup>-/-</sup> (Thy1.1-) cells at time of adoptive transfer (*left*) and recovered from indicated recipient tissues 24 hours after transfer. Representative of two experiments,  $n=4$ . Average percentage of each population is displayed within gates  $\pm$  S.D.

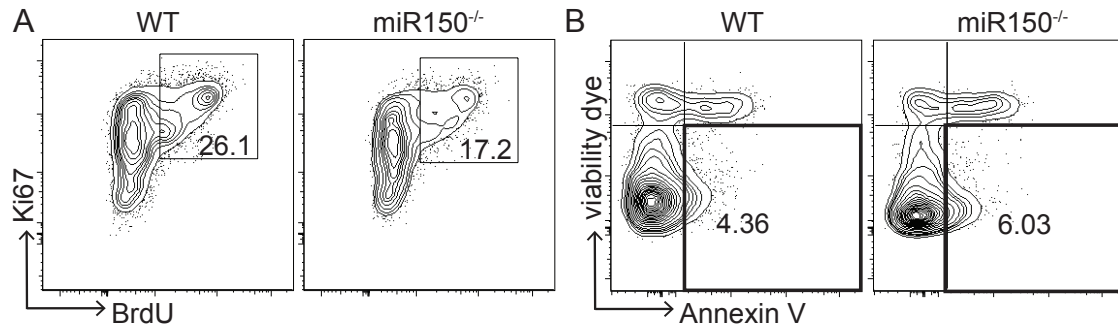

Figure S2. (A) Representative flow cytometric plots showing Ki67 and BrdU incorporation (7 dpi). (B) Representative flow cytometric plots of annexin V apoptosis staining (7 dpi). Negative staining for fixable viability dye efluor-780 was used to determine cell viability. (C) Representative flow cytometric histograms of CD44 and CD62L expression in naïve WT and miR-150<sup>-/-</sup> CD8<sup>+</sup> T cells. Data are representative of at least two independent experiments,  $n=8$ .

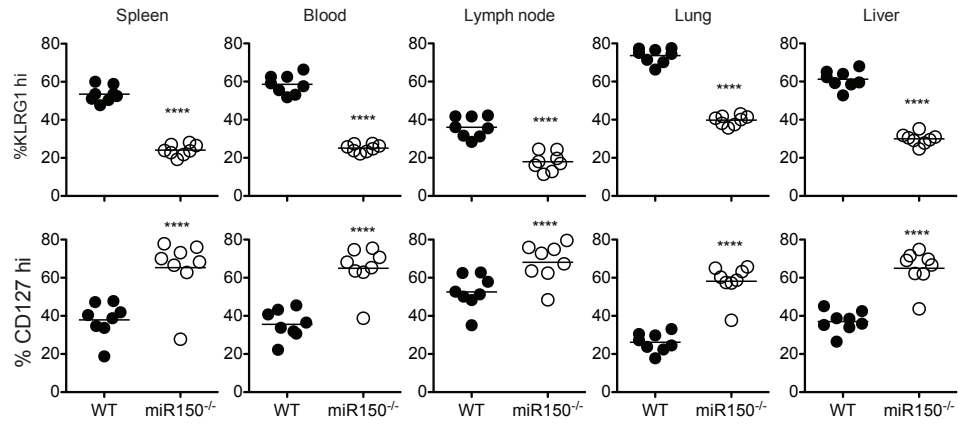

Figure S3. Effector cell surface phenotype of CD8<sup>+</sup> T cells recovered from indicated tissues of co-transfer recipients 7 dpi. Data representative of 2 independent experiments, n=8. \*\*\*\*, p=0.0001, paired student t test.

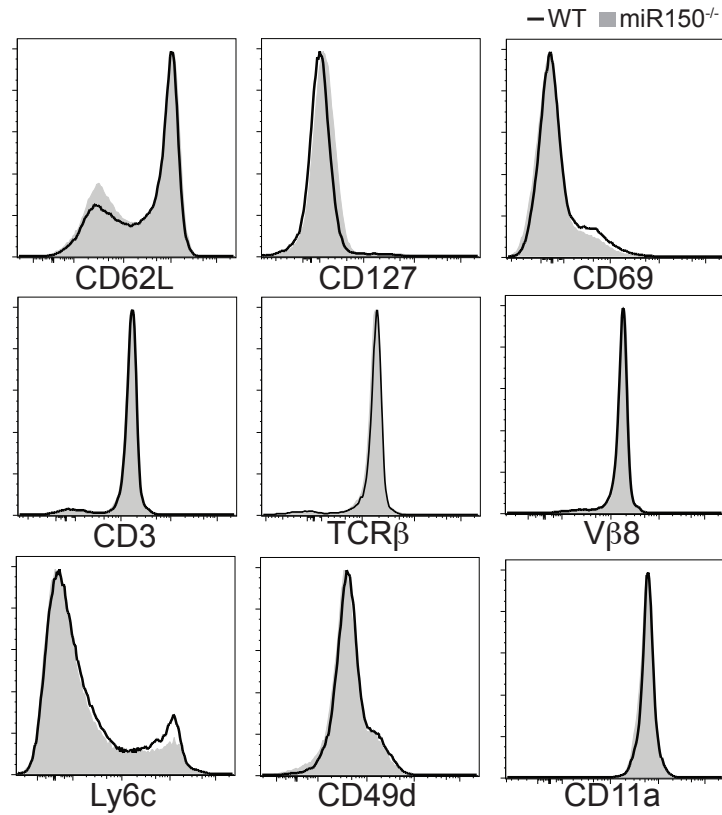

Figure S4. Representative histograms of surface markers in CD8<sup>+</sup> splenocytes from naive WT or miR150<sup>-/-</sup> gBT-I mice. Data representative of 2 independent experiments, n=4.

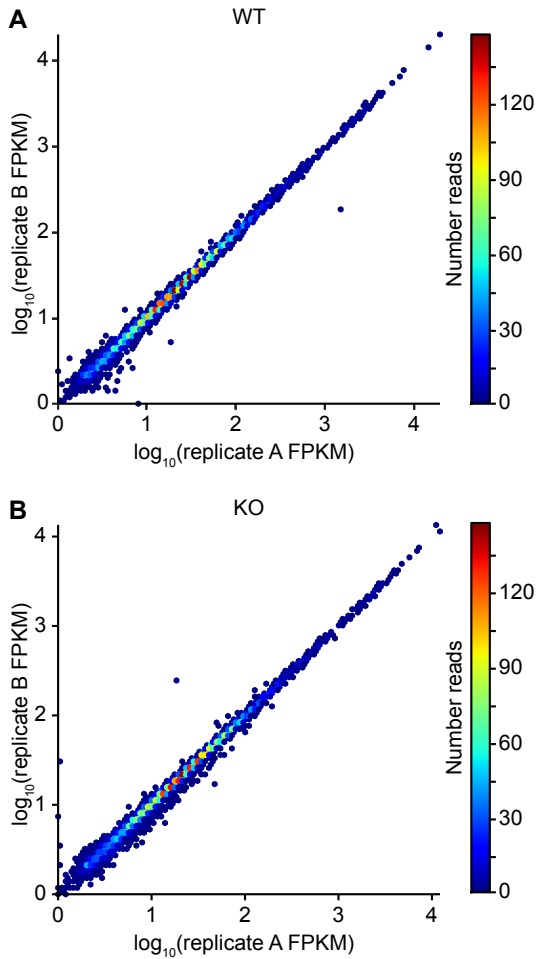

Figure S5. (A) FPKM values for genes that are coding and expressed (average FPKM >1) compared between biological replicates of WT cells. Pearson  $r > 0.998$ ,  $p < 10^{-15}$ . (B) FPKM values for genes that are coding and expressed (average FPKM >1) compared between biological replicates of miR-150<sup>-/-</sup> cells. Pearson  $r > 0.997$ ,  $p < 10^{-15}$ .

Supplemental Table S1. Differentially expressed miR-150 targets in WT and miR-150<sup>-/-</sup>(KO) effector CD8<sup>+</sup> T cells.

| Gene    | wt FPKM  | KO FPKM | q value  | log2 (KO/wt) | Context+ score |
|---------|----------|---------|----------|--------------|----------------|
| Adam19  | 49.5868  | 75.4729 | 0.000236 | 0.596188     | -0.339         |
| Btla    | 11.116   | 15.814  | 0.004073 | 0.472749     | -0.402         |
| Cd55    | 11.8494  | 20.0132 | 0.000236 | 0.709595     | -0.24          |
| Dirc2   | 2.84849  | 4.46119 | 0.001222 | 0.504923     | -0.274         |
| Dynlt3  | 4.88756  | 7.62214 | 0.003439 | 0.550376     | -0.307         |
| Fam174b | 3.08904  | 6.5917  | 0.000236 | 0.892661     | -0.411         |
| Fn3k    | 1.22602  | 2.81961 | 0.015108 | 0.778959     | -0.339         |
| Gstt3   | 0.911744 | 1.81065 | 0.014843 | 0.556014     | -0.479         |
| Ikzf2   | 0.613104 | 1.69963 | 0.000236 | 0.742922     | -0.245         |
| Il18r1  | 168.659  | 248.039 | 0.001762 | 0.553734     | -0.335         |
| Lca5    | 1.28134  | 2.22315 | 0.002109 | 0.49859      | -0.253         |
| Mapk11  | 5.4152   | 10.0096 | 0.000236 | 0.779196     | -0.213         |
| Pim2    | 38.9578  | 59.4826 | 0.000236 | 0.598043     | -0.262         |
| Prrt2   | 1.34347  | 2.23175 | 0.017799 | 0.463669     | -0.217         |
| Sgms1   | 19.4662  | 31.3661 | 0.000236 | 0.66124      | -0.203         |
| Trem12  | 1.14707  | 2.72622 | 0.000236 | 0.795344     | -0.204         |
| Wbscr27 | 2.03491  | 3.05238 | 0.031072 | 0.417116     | -0.242         |
| Zscan12 | 1.11573  | 1.82421 | 0.011485 | 0.416692     | -0.22          |

Supplemental Table S2. Expressed genes and FPKM values for WT and miR-150<sup>-/-</sup>(KO) effector CD8<sup>+</sup> T cells.



| Gene          | wt FPKM  | KO FPKM  | log2(KO/wt) | p value  | q value     | Sig |
|---------------|----------|----------|-------------|----------|-------------|-----|
| 0610007P14Rik | 35.8338  | 38.8185  | 0.115421    | 0.45855  | 0.616026    | no  |
| 0610009B22Rik | 8.4556   | 9.12655  | 0.110162    | 0.654    | 0.782569    | no  |
| 0610009O20Rik | 17.5443  | 19.4828  | 0.151199    | 0.3214   | 0.476267    | no  |
| 0610010F05Rik | 3.43524  | 3.7028   | 0.108207    | 0.5572   | 0.704152    | no  |
| 0610010K14Rik | 109.814  | 100.285  | -0.130953   | 0.3791   | 0.538101    | no  |
| 0610011F06Rik | 21.7053  | 24.5578  | 0.178129    | 0.33705  | 0.493234    | no  |
| 0610030E20Rik | 14.2573  | 13.6488  | -0.0629176  | 0.6647   | 0.790268    | no  |
| 0610031J06Rik | 99.7067  | 95.8185  | -0.057387   | 0.6832   | 0.803975    | no  |
| 0610037L13Rik | 13.7562  | 14.3382  | 0.0597861   | 0.7342   | 0.83966     | no  |
| 1110001J03Rik | 29.8878  | 28.2844  | -0.0795511  | 0.72125  | 0.830732    | no  |
| 1110004E09Rik | 16.166   | 17.0201  | 0.0742759   | 0.6855   | 0.805688    | no  |
| 1110004F10Rik | 70.5943  | 67.5087  | -0.0644778  | 0.6547   | 0.782942    | no  |
| 1110007C09Rik | 27.218   | 32.191   | 0.242099    | 0.16825  | 0.293032    | no  |
| 1110008F13Rik | 51.4058  | 50.6038  | -0.0226857  | 0.9316   | 0.962642    | no  |
| 1110008L16Rik | 2.75807  | 3.49465  | 0.341491    | 0.3055   | 0.458344    | no  |
| 1110008P14Rik | 71.4964  | 80.4221  | 0.169722    | 0.2849   | 0.435218    | no  |
| 1110012L19Rik | 17.4381  | 16.4035  | -0.0882454  | 0.62495  | 0.759761    | no  |
| 1110032A03Rik | 1.72435  | 1.61315  | -0.0961739  | 0.75215  | 0.851893    | no  |
| 1110034G24Rik | 10.8108  | 10.6614  | -0.0200734  | 0.91225  | 0.9519      | no  |
| 1110037F02Rik | 24.4804  | 22.8228  | -0.10115    | 0.47715  | 0.633216    | no  |
| 1110038F14Rik | 34.5615  | 32.2764  | -0.0986868  | 0.54095  | 0.690253    | no  |
| 1110057K04Rik | 28.7798  | 24.8999  | -0.208916   | 0.16725  | 0.291831    | no  |
| 1110058L19Rik | 27.9301  | 27.6046  | -0.016911   | 0.9266   | 0.959991    | no  |
| 1110059E24Rik | 14.1733  | 12.2361  | -0.212043   | 0.2392   | 0.384172    | no  |
| 1110059G10Rik | 4.70244  | 4.42152  | -0.0888681  | 0.6241   | 0.759094    | no  |
| 1110065P20Rik | 9.7184   | 10.0344  | 0.0461578   | 0.9185   | 0.955413    | no  |
| 1190002N15Rik | 10.3868  | 12.3059  | 0.244597    | 0.10695  | 0.204241    | no  |
| 1190007I07Rik | 7.61867  | 6.8513   | -0.153162   | 0.5706   | 0.715208    | no  |
| 1200014J11Rik | 13.2947  | 12.8206  | -0.0523946  | 0.7211   | 0.830668    | no  |
| 1500009L16Rik | 22.9839  | 35.0084  | 0.607082    | 0.00025  | 0.00103712  | yes |
| 1500012F01Rik | 102.713  | 93.6133  | -0.13384    | 0.57355  | 0.717733    | no  |
| 1600002H07Rik | 3.55192  | 3.61944  | 0.0271663   | 0.9007   | 0.945017    | no  |
| 1600002K03Rik | 25.8916  | 31.2271  | 0.270315    | 0.1483   | 0.264727    | no  |
| 1600012H06Rik | 14.9289  | 12.4022  | -0.267515   | 0.20595  | 0.343796    | no  |
| 1600014C10Rik | 31.0591  | 25.7654  | -0.269581   | 0.06165  | 0.129706    | no  |
| 1600016N20Rik | 2.6409   | 2.82821  | 0.0988592   | 0.7366   | 0.841519    | no  |
| 1700001O22Rik | 2.86051  | 2.12574  | -0.428309   | 0.1695   | 0.294766    | no  |
| 1700009P17Rik | 1.47147  | 1.07431  | -0.453849   | 0.2894   | 0.440196    | no  |
| 1700010I14Rik | 2.34496  | 3.38295  | 0.528717    | 0.03615  | 0.0826436   | no  |
| 1700017B05Rik | 15.2503  | 22.656   | 0.571057    | 5.00E-05 | 0.000236281 | yes |
| 1700019G17Rik | 3.06565  | 2.43662  | -0.331315   | 0.1419   | 0.255689    | no  |
| 1700020D05Rik | 1.06422  | 1.67547  | 0.654761    | 0.3118   | 0.465451    | no  |
| 1700020L24Rik | 17.1543  | 15.7536  | -0.122892   | 0.5171   | 0.669724    | no  |
| 1700021F05Rik | 12.1164  | 9.57029  | -0.340327   | 0.1173   | 0.220164    | no  |
| 1700021K19Rik | 5.98803  | 5.55467  | -0.108379   | 0.50185  | 0.65604     | no  |
| 1700025G04Rik | 8.71723  | 5.48573  | -0.668186   | 5.00E-05 | 0.000236281 | yes |
| 1700026L06Rik | 1.34105  | 0.704835 | -0.928003   | 0.1512   | 0.268945    | no  |
| 1700029I15Rik | 1.44874  | 1.41869  | -0.0302394  | 0.9078   | 0.949278    | no  |
| 1700029J07Rik | 0.491483 | 1.00562  | 1.03287     | 0.0062   | 0.0180576   | yes |

|               |          |          |             |          |             |     |
|---------------|----------|----------|-------------|----------|-------------|-----|
| 1700030K09Rik | 3.41983  | 3.96472  | 0.213296    | 0.72     | 0.829861    | no  |
| 1700037C18Rik | 4.29959  | 4.79242  | 0.156556    | 0.552    | 0.699685    | no  |
| 1700037H04Rik | 15.5088  | 16.704   | 0.107107    | 0.5484   | 0.696673    | no  |
| 1700052N19Rik | 12.9571  | 12.9075  | -0.00552972 | 0.97255  | 0.984885    | no  |
| 1700056E22Rik | 2.723    | 2.95987  | 0.120339    | 0.7134   | 0.825368    | no  |
| 1700066M21Rik | 4.40437  | 3.72888  | -0.240192   | 0.2124   | 0.352089    | no  |
| 1700088E04Rik | 5.68602  | 5.83959  | 0.0384477   | 0.9368   | 0.965724    | no  |
| 1700094D03Rik | 4.51047  | 4.96373  | 0.138144    | 0.8482   | 0.913382    | no  |
| 1700102P08Rik | 1.38585  | 1.29876  | -0.0936367  | 0.8173   | 0.894617    | no  |
| 1700109H08Rik | 1.51245  | 2.23983  | 0.566497    | 0.5819   | 0.724854    | no  |
| 1700123O20Rik | 23.2204  | 22.4795  | -0.0467817  | 0.9224   | 0.957889    | no  |
| 1810009A15Rik | 75.3041  | 68.5524  | -0.135521   | 0.40955  | 0.568563    | no  |
| 1810013L24Rik | 16.4834  | 17.792   | 0.110216    | 0.44465  | 0.602409    | no  |
| 1810022K09Rik | 148      | 144.241  | -0.037118   | 0.83205  | 0.903643    | no  |
| 1810026J23Rik | 17.3777  | 17.0518  | -0.0273161  | 0.8945   | 0.94117     | no  |
| 1810030O07Rik | 31.6132  | 29.1381  | -0.117624   | 0.4176   | 0.576202    | no  |
| 1810037I17Rik | 83.2103  | 78.2442  | -0.0887784  | 0.543    | 0.69218     | no  |
| 1810043G02Rik | 4.30932  | 5.44257  | 0.336831    | 0.12345  | 0.229274    | no  |
| 1810043H04Rik | 31.9964  | 32.5223  | 0.0235212   | 0.90715  | 0.948893    | no  |
| 1810055G02Rik | 1.49429  | 1.26452  | -0.24087    | 0.4457   | 0.603356    | no  |
| 2010012O05Rik | 17.4355  | 7.45816  | -1.22513    | 5.00E-05 | 0.000236281 | yes |
| 2010015L04Rik | 0.908523 | 1.17362  | 0.369374    | 0.337    | 0.493202    | no  |
| 2010107E04Rik | 421.748  | 377.626  | -0.159425   | 0.2841   | 0.434231    | no  |
| 2010111I01Rik | 30.0795  | 33.0731  | 0.13688     | 0.4614   | 0.618489    | no  |
| 2200002D01Rik | 1.2035   | 1.29047  | 0.100662    | 0.93665  | 0.965654    | no  |
| 2210011C24Rik | 1.84405  | 2.29303  | 0.314377    | 0.412    | 0.57092     | no  |
| 2210013O21Rik | 21.931   | 22.0468  | 0.00760182  | 0.96995  | 0.983692    | no  |
| 2210016F16Rik | 17.9993  | 19.891   | 0.144171    | 0.3402   | 0.49667     | no  |
| 2210016L21Rik | 28.9578  | 25.9433  | -0.158592   | 0.32325  | 0.478245    | no  |
| 2210018M11Rik | 17.1597  | 15.6557  | -0.132338   | 0.3688   | 0.527374    | no  |
| 2210404O09Rik | 1.86973  | 2.40052  | 0.360519    | 0.16025  | 0.281966    | no  |
| 2300009A05Rik | 18.0394  | 18.0945  | 0.00439936  | 0.98955  | 0.993761    | no  |
| 2310003H01Rik | 5.73181  | 5.84695  | 0.0286933   | 0.87375  | 0.92906     | no  |
| 2310009B15Rik | 8.20821  | 4.73614  | -0.793355   | 0.0153   | 0.0395135   | yes |
| 2310011J03Rik | 37.5517  | 35.873   | -0.0659776  | 0.65935  | 0.786544    | no  |
| 2310022A10Rik | 12.9875  | 12.1192  | -0.099827   | 0.5352   | 0.685568    | no  |
| 2310022B05Rik | 1.9408   | 2.5836   | 0.412731    | 0.06495  | 0.135198    | no  |
| 2310033P09Rik | 22.0431  | 22.6596  | 0.0397974   | 0.8125   | 0.891603    | no  |
| 2310035C23Rik | 14.7189  | 15.1037  | 0.0372351   | 0.7929   | 0.879239    | no  |
| 2310036O22Rik | 160.763  | 147.714  | -0.122136   | 0.39135  | 0.550431    | no  |
| 2310039H08Rik | 11.1114  | 12.0125  | 0.112496    | 0.62175  | 0.757188    | no  |
| 2310045N01Rik | 93.6669  | 102.122  | 0.124688    | 0.4152   | 0.573957    | no  |
| 2310047M10Rik | 11.3438  | 10.8778  | -0.0605131  | 0.7282   | 0.835319    | no  |
| 2310057M21Rik | 7.56868  | 7.5692   | 9.88E-05    | 0.9936   | 0.995999    | no  |
| 2310061I04Rik | 19.9755  | 20.48    | 0.0359841   | 0.8367   | 0.906434    | no  |
| 2310067B10Rik | 14.9831  | 14.245   | -0.0728755  | 0.6115   | 0.748879    | no  |
| 2410002F23Rik | 14.9457  | 17.0075  | 0.186433    | 0.243    | 0.387831    | no  |
| 2410004B18Rik | 28.9508  | 24.7081  | -0.228617   | 0.17735  | 0.305638    | no  |
| 2410015M20Rik | 88.0771  | 85.7412  | -0.0387774  | 0.8019   | 0.884923    | no  |
| 2410016O06Rik | 10.9255  | 12.0284  | 0.138753    | 0.40215  | 0.56117     | no  |
| 2410076I21Rik | 1.02699  | 0.651651 | -0.656245   | 0.78525  | 0.874329    | no  |
| 2410089E03Rik | 4.36869  | 4.4768   | 0.0352664   | 0.8196   | 0.89605     | no  |
| 2410127L17Rik | 19.1111  | 19.3513  | 0.018023    | 0.9067   | 0.948633    | no  |
| 2410131K14Rik | 5.68991  | 6.00662  | 0.0781469   | 0.67105  | 0.795166    | no  |
| 2510002D24Rik | 22.1068  | 26.4862  | 0.260754    | 0.1181   | 0.221359    | no  |
| 2510003E04Rik | 11.4562  | 11.9247  | 0.0578348   | 0.7308   | 0.837264    | no  |
| 2510039O18Rik | 56.402   | 54.3279  | -0.0540537  | 0.7007   | 0.816361    | no  |

|                |         |          |             |         |            |     |
|----------------|---------|----------|-------------|---------|------------|-----|
| 2610002J02Rik  | 31.9807 | 31.4847  | -0.0225518  | 0.8874  | 0.936912   | no  |
| 2610002M06Rik  | 5.52696 | 5.32105  | -0.0547755  | 0.73135 | 0.837636   | no  |
| 2610008E11Rik  | 5.58569 | 5.78968  | 0.0517497   | 0.769   | 0.863206   | no  |
| 2610015P09Rik  | 1.89747 | 2.60477  | 0.457079    | 0.03525 | 0.0808585  | no  |
| 2610018G03Rik  | 48.3034 | 47.5252  | -0.0234325  | 0.87375 | 0.92906    | no  |
| 2610020H08Rik  | 21.6443 | 26.5903  | 0.29691     | 0.0533  | 0.114734   | no  |
| 2610044O15Rik8 | 2.37258 | 2.34671  | -0.0158201  | 0.96255 | 0.979918   | no  |
| 2610301B20Rik  | 4.33235 | 5.58385  | 0.366109    | 0.0691  | 0.142259   | no  |
| 2610318N02Rik  | 8.99185 | 6.90525  | -0.380925   | 0.072   | 0.147225   | no  |
| 2610507B11Rik  | 38.2227 | 41.5214  | 0.119428    | 0.4025  | 0.561448   | no  |
| 2610524H06Rik  | 14.7486 | 12.4614  | -0.24311    | 0.2194  | 0.360518   | no  |
| 2610528A11Rik  | 4.04166 | 0.913098 | -2.14611    | 0.00105 | 0.00375607 | yes |
| 2700029M09Rik  | 54.7569 | 48.6286  | -0.171235   | 0.25555 | 0.400427   | no  |
| 2700049A03Rik  | 2.56355 | 2.73881  | 0.0954031   | 0.6012  | 0.740802   | no  |
| 2700060E02Rik  | 93.8625 | 99.0439  | 0.0775188   | 0.587   | 0.729148   | no  |
| 2700062C07Rik  | 13.2033 | 12.0854  | -0.127626   | 0.5093  | 0.662808   | no  |
| 2700081O15Rik  | 3.58565 | 2.80987  | -0.351732   | 0.5343  | 0.684751   | no  |
| 2700089E24Rik  | 12.2584 | 12.638   | 0.0439993   | 0.8325  | 0.903937   | no  |
| 2700094K13Rik  | 96.371  | 79.9345  | -0.269781   | 0.0833  | 0.166214   | no  |
| 2700097O09Rik  | 3.52293 | 3.46378  | -0.0244292  | 0.9285  | 0.961      | no  |
| 2810004N23Rik  | 22.9142 | 26.5025  | 0.209888    | 0.1975  | 0.332926   | no  |
| 2810006K23Rik  | 10.2323 | 9.20235  | -0.153054   | 0.40285 | 0.561836   | no  |
| 2810021J22Rik  | 3.15186 | 2.62393  | -0.264475   | 0.15455 | 0.273779   | no  |
| 2810403A07Rik  | 30.0166 | 28.3185  | -0.0840123  | 0.5664  | 0.711701   | no  |
| 2810408M09Rik  | 10.1647 | 12.1837  | 0.261388    | 0.1327  | 0.243045   | no  |
| 2810417H13Rik  | 63.1645 | 33.6636  | -0.907923   | 0.0031  | 0.00983478 | yes |
| 2810428I15Rik  | 39.6324 | 44.8074  | 0.177059    | 0.30965 | 0.463104   | no  |
| 2810474O19Rik  | 18.8491 | 23.0469  | 0.290072    | 0.0442  | 0.0980121  | no  |
| 3010026O09Rik  | 3.55291 | 3.61551  | 0.0251981   | 0.92715 | 0.960307   | no  |
| 3110001I22Rik  | 5.5058  | 5.10492  | -0.109064   | 0.81125 | 0.890853   | no  |
| 3110002H16Rik  | 42.3645 | 41.821   | -0.0186272  | 0.9275  | 0.960472   | no  |
| 3110009E18Rik  | 11.3074 | 8.72263  | -0.374435   | 0.1991  | 0.334983   | no  |
| 3110040N11Rik  | 27.2574 | 27.1231  | -0.00712815 | 0.9673  | 0.982218   | no  |
| 3110043O21Rik  | 1.55285 | 1.80494  | 0.217038    | 0.3764  | 0.535205   | no  |
| 3110052M02Rik  | 5.30998 | 5.31479  | 0.00130569  | 0.99625 | 0.997296   | no  |
| 3110057O12Rik  | 4.69607 | 4.80949  | 0.03443     | 0.85785 | 0.919663   | no  |
| 3110062M04Rik  | 5.61464 | 5.40717  | -0.0543182  | 0.76495 | 0.860549   | no  |
| 3830403N18Rik  | 1.82672 | 3.45007  | 0.917373    | 0.0107  | 0.0290897  | yes |
| 3830406C13Rik  | 18.2853 | 17.3676  | -0.0742806  | 0.63315 | 0.766285   | no  |
| 4632428N05Rik  | 106.761 | 116.189  | 0.122091    | 0.3841  | 0.543156   | no  |
| 4632434I11Rik  | 2.3274  | 1.82394  | -0.351658   | 0.11835 | 0.221769   | no  |
| 4833420G17Rik  | 42.9832 | 39.982   | -0.104421   | 0.4725  | 0.629079   | no  |
| 4833439L19Rik  | 26.1223 | 24.7284  | -0.0791123  | 0.61745 | 0.753955   | no  |
| 4921524J17Rik  | 15.7827 | 15.6857  | -0.00888671 | 0.95665 | 0.976752   | no  |
| 4930402H24Rik  | 4.8295  | 5.0589   | 0.0669492   | 0.69005 | 0.809055   | no  |
| 4930404N11Rik  | 1.48722 | 2.55327  | 0.779731    | 0.16265 | 0.285349   | no  |
| 4930427A07Rik  | 7.67883 | 6.05848  | -0.341932   | 0.04535 | 0.100175   | no  |
| 4930430F08Rik  | 2.55896 | 2.9697   | 0.214758    | 0.37395 | 0.532623   | no  |
| 4930453N24Rik  | 69.8824 | 69.2991  | -0.0120928  | 0.93455 | 0.964438   | no  |
| 4930486L24Rik  | 14.4841 | 14.4266  | -0.00574108 | 0.973   | 0.985143   | no  |
| 4930503L19Rik  | 15.3265 | 13.6436  | -0.16781    | 0.30405 | 0.456848   | no  |
| 4930523C07Rik  | 29.9594 | 27.4577  | -0.125798   | 0.4301  | 0.588389   | no  |
| 4930579G24Rik  | 11.4667 | 7.4988   | -0.612718   | 0.00095 | 0.00343861 | yes |
| 4931406C07Rik  | 2.28518 | 2.0238   | -0.175244   | 0.80605 | 0.887519   | no  |
| 4931406P16Rik  | 12.3366 | 11.9668  | -0.0439087  | 0.76795 | 0.862522   | no  |
| 4931414P19Rik  | 4.78798 | 4.39458  | -0.123692   | 0.52045 | 0.672545   | no  |
| 4931428F04Rik  | 2.17077 | 2.71407  | 0.322247    | 0.12775 | 0.235716   | no  |

|                |          |          |             |          |             |     |
|----------------|----------|----------|-------------|----------|-------------|-----|
| 4932438A13Rik  | 25.0578  | 26.6306  | 0.0878293   | 0.5357   | 0.685997    | no  |
| 4933411K20Rik  | 7.60379  | 8.66746  | 0.18889     | 0.233    | 0.376933    | no  |
| 4933426M11Rik  | 20.8809  | 22.4793  | 0.106416    | 0.45065  | 0.608075    | no  |
| 4933427D14Rik  | 11.1124  | 8.76533  | -0.342293   | 0.02715  | 0.0648868   | no  |
| 4933434E20Rik  | 36.6043  | 36.7107  | 0.00418757  | 0.99165  | 0.99492     | no  |
| 5031414D18Rik  | 1.0487   | 1.34071  | 0.354391    | 0.23095  | 0.374381    | no  |
| 5031439G07Rik  | 2.11318  | 2.52552  | 0.257167    | 0.19345  | 0.327413    | no  |
| 5430427O19Rik  | 5.69883  | 5.80392  | 0.0263623   | 0.87635  | 0.930717    | no  |
| 5730455P16Rik  | 5.47203  | 5.04627  | -0.116858   | 0.4828   | 0.638397    | no  |
| 5730507C01Rik  | 1.0063   | 1.17777  | 0.227004    | 0.45495  | 0.612694    | no  |
| 5730508B09Rik  | 18.9463  | 19.3919  | 0.0335387   | 0.83605  | 0.906063    | no  |
| 5830411N06Rik  | 1.58281  | 2.04664  | 0.370767    | 0.12665  | 0.234097    | no  |
| 5830415F09Rik  | 4.55252  | 5.38625  | 0.242615    | 0.2764   | 0.425428    | no  |
| 5830418K08Rik  | 9.2405   | 9.30409  | 0.00989281  | 0.9606   | 0.978837    | no  |
| 6030458C11Rik  | 13.1262  | 15.6924  | 0.257624    | 0.08275  | 0.165266    | no  |
| 6330403K07Rik  | 10.014   | 6.17551  | -0.69739    | 0.00035  | 0.0014053   | yes |
| 6330409D20Rik  | 1.60965  | 1.55189  | -0.0527229  | 0.91395  | 0.952853    | no  |
| 6330416G13Rik  | 8.97877  | 8.96296  | -0.00254239 | 0.989    | 0.993518    | no  |
| 6720489N17Rik  | 1.12893  | 0.554337 | -1.02612    | 0.00565  | 0.0166536   | yes |
| 8030462N17Rik  | 9.2774   | 8.59147  | -0.110815   | 0.4974   | 0.651804    | no  |
| 8430419L09Rik  | 6.61275  | 7.05578  | 0.0935544   | 0.5708   | 0.715408    | no  |
| 9030025P20Rik  | 1.48597  | 1.33372  | -0.155943   | 0.58875  | 0.730589    | no  |
| 9030617O03Rik  | 3.27262  | 7.01119  | 1.09921     | 5.00E-05 | 0.000236281 | yes |
| 9030624J02Rik  | 27.1028  | 25.8531  | -0.0681075  | 0.62935  | 0.763126    | no  |
| 9130011E15Rik  | 6.40826  | 6.09685  | -0.0718686  | 0.6899   | 0.808973    | no  |
| 9130019O22Rik  | 0.897863 | 1.13263  | 0.335112    | 0.2111   | 0.350527    | no  |
| 9130023H24Rik  | 2.41086  | 2.16108  | -0.157796   | 0.7167   | 0.827517    | no  |
| 9130401M01Rik  | 15.2124  | 14.4095  | -0.0782284  | 0.65805  | 0.785511    | no  |
| 9430015G10Rik  | 9.29827  | 9.22276  | -0.0117647  | 0.9425   | 0.968799    | no  |
| 9430016H08Rik  | 12.4215  | 13.5979  | 0.130535    | 0.5542   | 0.701604    | no  |
| 9430038I01Rik  | 5.30775  | 6.00476  | 0.178006    | 0.4638   | 0.620845    | no  |
| 9530068E07Rik  | 33.1338  | 35.3238  | 0.0923359   | 0.5215   | 0.673556    | no  |
| 9630033F20Rik  | 12.1816  | 11.5966  | -0.071009   | 0.6427   | 0.773651    | no  |
| 9930012K11Rik  | 6.33892  | 6.28856  | -0.0115086  | 0.94885  | 0.97238     | no  |
| 9930021J03Rik  | 5.16313  | 4.69537  | -0.137009   | 0.37405  | 0.53269     | no  |
| 9930104L06Rik  | 5.13735  | 5.70355  | 0.150836    | 0.41015  | 0.569104    | no  |
| 9930111J21Rik1 | 29.6371  | 32.9931  | 0.154756    | 0.31815  | 0.472482    | no  |
| a              | 1.39568  | 1.02437  | -0.446234   | 0.41555  | 0.57426     | no  |
| A130010J15Rik  | 2.43648  | 2.38542  | -0.0305548  | 0.9698   | 0.983653    | no  |
| A230046K03Rik  | 13.4538  | 14.6177  | 0.119701    | 0.40665  | 0.56556     | no  |
| A230050P20Rik  | 12.0708  | 13.139   | 0.122326    | 0.5054   | 0.659399    | no  |
| A430005L14Rik  | 25.6359  | 24.5011  | -0.0653181  | 0.69715  | 0.81408     | no  |
| A430033K04Rik  | 2.35003  | 3.1041   | 0.401496    | 0.0607   | 0.128028    | no  |
| A430078G23Rik  | 37.3551  | 31.6523  | -0.238996   | 0.09025  | 0.177646    | no  |
| A430107P09Rik  | 2.63613  | 1.42053  | -0.891993   | 0.00175  | 0.00592472  | yes |
| A530054K11Rik  | 5.93733  | 5.29661  | -0.164746   | 0.3117   | 0.465361    | no  |
| A630001G21Rik  | 47.3392  | 43.3345  | -0.12752    | 0.3808   | 0.539787    | no  |
| A630007B06Rik  | 10.1514  | 9.92412  | -0.0326702  | 0.8415   | 0.9094      | no  |
| A630033H20Rik  | 6.92402  | 5.49533  | -0.333404   | 0.06095  | 0.128482    | no  |
| A730008H23Rik  | 11.8273  | 10.0541  | -0.234343   | 0.5553   | 0.702417    | no  |
| A830080D01Rik  | 7.23946  | 5.95007  | -0.282976   | 0.09595  | 0.186864    | no  |
| AA414768       | 3.5498   | 1.60837  | -1.14214    | 0.00035  | 0.0014053   | yes |
| AA415398       | 0.976522 | 1.11383  | 0.189806    | 0.5902   | 0.73177     | no  |
| AA467197       | 23.8479  | 18.6943  | -0.351267   | 0.0837   | 0.166866    | no  |
| AA987161       | 7.22339  | 6.90623  | -0.0647768  | 0.6808   | 0.802355    | no  |
| Aaas           | 30.5781  | 27.2935  | -0.163942   | 0.285    | 0.435314    | no  |
| Aacs           | 4.43146  | 5.42189  | 0.291012    | 0.1114   | 0.211122    | no  |

|          |         |         |              |          |             |     |
|----------|---------|---------|--------------|----------|-------------|-----|
| Aaed1    | 24.5935 | 28.2553 | 0.200241     | 0.2414   | 0.385984    | no  |
| Aagab    | 28.7887 | 29.1361 | 0.0173049    | 0.9045   | 0.947357    | no  |
| Aak1     | 19.6949 | 20.2504 | 0.0401287    | 0.7746   | 0.867107    | no  |
| Aamdc    | 22.1848 | 22.7558 | 0.0366629    | 0.849    | 0.913881    | no  |
| Aamp     | 81.5278 | 79.2853 | -0.0402383   | 0.77655  | 0.868339    | no  |
| Aar2     | 5.52297 | 4.98941 | -0.146575    | 0.4006   | 0.559616    | no  |
| Aars     | 27.8947 | 24.7467 | -0.172756    | 0.22575  | 0.368431    | no  |
| Aars2    | 4.62722 | 4.54333 | -0.026396    | 0.8877   | 0.937033    | no  |
| Aarsd1   | 20.4266 | 21.0937 | 0.0463629    | 0.7848   | 0.874075    | no  |
| Aasdh    | 3.45933 | 3.65782 | 0.0804903    | 0.6689   | 0.793564    | no  |
| Aasdhppt | 7.25086 | 7.63331 | 0.0741561    | 0.66795  | 0.792797    | no  |
| Aatf     | 14.7606 | 16.1964 | 0.133924     | 0.41275  | 0.571521    | no  |
| AB124611 | 70.9444 | 76.7646 | 0.113754     | 0.43205  | 0.590244    | no  |
| Abca2    | 52.0896 | 59.6521 | 0.195578     | 0.1657   | 0.289713    | no  |
| Abca3    | 6.81365 | 12.5177 | 0.877465     | 5.00E-05 | 0.000236281 | yes |
| Abca7    | 34.1567 | 32.531  | -0.0703563   | 0.6196   | 0.755587    | no  |
| Abcb10   | 2.85935 | 3.26972 | 0.193481     | 0.29985  | 0.452165    | no  |
| Abcb1a   | 11.2847 | 7.75339 | -0.541467    | 4.00E-04 | 0.00158415  | yes |
| Abcb1b   | 10.4932 | 11.215  | 0.0959827    | 0.52565  | 0.677169    | no  |
| Abcb6    | 1.16048 | 1.28362 | 0.145501     | 0.59455  | 0.735355    | no  |
| Abcb7    | 11.1832 | 10.947  | -0.0308069   | 0.8336   | 0.904561    | no  |
| Abcb8    | 7.22895 | 8.6444  | 0.25798      | 0.1272   | 0.234922    | no  |
| Abcb9    | 4.84355 | 5.07559 | 0.0675117    | 0.70675  | 0.820782    | no  |
| Abcc1    | 5.71501 | 7.50064 | 0.392259     | 0.0112   | 0.030266    | yes |
| Abcc10   | 4.55678 | 4.93324 | 0.11452      | 0.48815  | 0.64323     | no  |
| Abcc4    | 9.72636 | 9.79294 | 0.00984293   | 0.94715  | 0.971428    | no  |
| Abcc5    | 11.8795 | 12.9087 | 0.119875     | 0.552    | 0.699685    | no  |
| Abcd1    | 19.5575 | 17.8118 | -0.134894    | 0.36785  | 0.526367    | no  |
| Abcd3    | 4.96977 | 5.06959 | 0.0286894    | 0.8738   | 0.929085    | no  |
| Abcd4    | 10.8708 | 9.1064  | -0.255505    | 0.12485  | 0.231412    | no  |
| Abce1    | 30.1208 | 33.5845 | 0.157036     | 0.27985  | 0.429483    | no  |
| Abcf1    | 71.5709 | 71.555  | -0.000320853 | 0.9986   | 0.998812    | no  |
| Abcf2    | 22.2428 | 24.1411 | 0.118155     | 0.4273   | 0.585659    | no  |
| Abcf3    | 14.5681 | 16.2585 | 0.158389     | 0.2945   | 0.446003    | no  |
| Abcg1    | 13.0316 | 13.2755 | 0.0267517    | 0.855    | 0.917876    | no  |
| Abcg2    | 1.02368 | 1.40454 | 0.456333     | 0.12665  | 0.234097    | no  |
| Abcg3    | 11.6553 | 8.75663 | -0.412538    | 0.01105  | 0.0299157   | yes |
| Abhd1    | 1.68458 | 2.04058 | 0.276585     | 0.8855   | 0.93597     | no  |
| Abhd10   | 10.361  | 10.3723 | 0.00157102   | 0.9943   | 0.996304    | no  |
| Abhd11   | 25.0624 | 24.7798 | -0.0163615   | 0.92325  | 0.95818     | no  |
| Abhd12   | 24.0201 | 23.1995 | -0.0501471   | 0.7481   | 0.849282    | no  |
| Abhd13   | 9.22693 | 9.54502 | 0.0488978    | 0.74985  | 0.850448    | no  |
| Abhd14a  | 4.35955 | 7.46213 | 0.775407     | 0.00145  | 0.00501121  | yes |
| Abhd14b  | 8.31725 | 10.2438 | 0.300566     | 0.1165   | 0.218983    | no  |
| Abhd15   | 1.54872 | 2.88034 | 0.895167     | 2.00E-04 | 0.0008488   | yes |
| Abhd16a  | 32.64   | 32.8657 | 0.00994239   | 0.94755  | 0.97174     | no  |
| Abhd17a  | 53.9086 | 54.399  | 0.0130664    | 0.9279   | 0.960632    | no  |
| Abhd17b  | 14.3304 | 12.827  | -0.159895    | 0.31675  | 0.470879    | no  |
| Abhd17c  | 7.63457 | 7.5101  | -0.0237151   | 0.89525  | 0.941567    | no  |
| Abhd2    | 27.6131 | 30.2385 | 0.131034     | 0.36425  | 0.522519    | no  |
| Abhd4    | 2.59707 | 3.14191 | 0.274755     | 0.21665  | 0.35733     | no  |
| Abhd5    | 8.44108 | 7.82827 | -0.108733    | 0.50645  | 0.660292    | no  |
| Abhd6    | 3.70643 | 3.86634 | 0.0609377    | 0.7856   | 0.874428    | no  |
| Abhd8    | 42.7107 | 50.7068 | 0.247581     | 0.08675  | 0.171859    | no  |
| Abi1     | 71.1941 | 65.5614 | -0.118911    | 0.4076   | 0.566479    | no  |
| Abi2     | 3.80634 | 5.90327 | 0.633107     | 3.00E-04 | 0.00122185  | yes |
| Abi3     | 4.52828 | 4.03386 | -0.166803    | 0.40855  | 0.567498    | no  |

|        |          |         |             |         |           |     |
|--------|----------|---------|-------------|---------|-----------|-----|
| Abl1   | 10.3859  | 10.6073 | 0.0304323   | 0.8314  | 0.903229  | no  |
| Abl2   | 4.33057  | 5.11933 | 0.241398    | 0.1051  | 0.201302  | no  |
| Ablim1 | 184.141  | 196.241 | 0.091812    | 0.54085 | 0.690225  | no  |
| Ablim2 | 1.81211  | 2.51291 | 0.471688    | 0.02895 | 0.0684975 | no  |
| Abr    | 39.7491  | 36.5154 | -0.122416   | 0.38835 | 0.547542  | no  |
| Abracl | 467.094  | 382.952 | -0.28655    | 0.04305 | 0.0958625 | no  |
| Abt1   | 8.43313  | 7.73081 | -0.12545    | 0.4237  | 0.58207   | no  |
| Abtb1  | 31.4732  | 31.1394 | -0.0153837  | 0.9225  | 0.957904  | no  |
| Abtb2  | 29.6266  | 23.0721 | -0.360747   | 0.01215 | 0.0324285 | yes |
| Acaa1a | 44.2082  | 44.2516 | 0.00141582  | 0.99155 | 0.994877  | no  |
| Acaa2  | 40.1163  | 35.9674 | -0.157499   | 0.30135 | 0.453854  | no  |
| Acaca  | 5.08921  | 5.06482 | -0.00692885 | 0.96575 | 0.981322  | no  |
| Acad10 | 1.59851  | 1.83046 | 0.195478    | 0.40305 | 0.561993  | no  |
| Acad11 | 4.09558  | 4.51129 | 0.139473    | 0.44825 | 0.605658  | no  |
| Acad8  | 7.78921  | 8.57714 | 0.139021    | 0.411   | 0.569914  | no  |
| Acad9  | 8.21922  | 7.96208 | -0.0458567  | 0.7751  | 0.867419  | no  |
| Acadl  | 55.7068  | 59.1886 | 0.0874667   | 0.5376  | 0.687582  | no  |
| Acadm  | 24.874   | 29.5881 | 0.250383    | 0.1008  | 0.194544  | no  |
| Acads  | 24.0786  | 22.3526 | -0.107307   | 0.48635 | 0.641553  | no  |
| Acadsb | 4.29273  | 4.26365 | -0.00980612 | 0.95485 | 0.975894  | no  |
| Acadvl | 35.06    | 32.5719 | -0.106195   | 0.4688  | 0.625462  | no  |
| Acap1  | 216.771  | 204.817 | -0.081832   | 0.57015 | 0.714822  | no  |
| Acap2  | 24.3643  | 22.0083 | -0.146722   | 0.3973  | 0.556393  | no  |
| Acap3  | 21.6291  | 23.2355 | 0.10336     | 0.47335 | 0.629783  | no  |
| Acat1  | 18.2156  | 19.1572 | 0.0727047   | 0.6219  | 0.757279  | no  |
| Acat2  | 9.60076  | 12.3909 | 0.368061    | 0.0305  | 0.071539  | no  |
| Acat3  | 13.5829  | 14.9007 | 0.133586    | 0.7642  | 0.860034  | no  |
| Acbd3  | 21.6117  | 21.477  | -0.00901766 | 0.95035 | 0.973324  | no  |
| Acbd4  | 8.05969  | 7.7646  | -0.0538134  | 0.7691  | 0.863264  | no  |
| Acbd5  | 13.6328  | 12.8216 | -0.0885088  | 0.56395 | 0.709734  | no  |
| Acbd6  | 39.6401  | 37.9059 | -0.0645386  | 0.68095 | 0.802451  | no  |
| Accs   | 3.84692  | 3.41663 | -0.171126   | 0.3512  | 0.508543  | no  |
| Acd    | 35.4852  | 34.5047 | -0.040424   | 0.87675 | 0.930946  | no  |
| Acer3  | 2.10121  | 1.81917 | -0.207938   | 0.3306  | 0.486285  | no  |
| Acin1  | 94.3666  | 95.1428 | 0.0118187   | 0.9408  | 0.967968  | no  |
| Acly   | 83.3148  | 78.2166 | -0.0910983  | 0.5143  | 0.66715   | no  |
| Acn9   | 4.61579  | 5.19541 | 0.17066     | 0.64245 | 0.773482  | no  |
| Aco1   | 11.3982  | 11.6728 | 0.0343516   | 0.82185 | 0.897384  | no  |
| Aco2   | 70.2274  | 67.1585 | -0.0644626  | 0.64725 | 0.77722   | no  |
| Acot11 | 4.3773   | 3.29033 | -0.411807   | 0.01605 | 0.0411688 | yes |
| Acot13 | 36.7228  | 39.2386 | 0.0955986   | 0.59045 | 0.731926  | no  |
| Acot2  | 5.69529  | 7.04304 | 0.30643     | 0.10365 | 0.199048  | no  |
| Acot7  | 99.2028  | 121.3   | 0.290132    | 0.04335 | 0.0964211 | no  |
| Acot8  | 25.4136  | 23.6827 | -0.101771   | 0.54565 | 0.694167  | no  |
| Acot9  | 46.2258  | 44.1263 | -0.0670595  | 0.65835 | 0.785763  | no  |
| Acox1  | 13.2801  | 11.2672 | -0.237136   | 0.223   | 0.364981  | no  |
| Acox3  | 15.1077  | 14.7565 | -0.0339351  | 0.82055 | 0.896589  | no  |
| Acp1   | 15.1342  | 14.7351 | -0.0385564  | 0.8016  | 0.884717  | no  |
| Acp2   | 3.24369  | 3.70469 | 0.191717    | 0.54005 | 0.689603  | no  |
| Acp5   | 193.707  | 178.24  | -0.120054   | 0.38975 | 0.54888   | no  |
| Acp6   | 9.26145  | 9.99937 | 0.1106      | 0.5386  | 0.688287  | no  |
| Acpp   | 0.837909 | 1.11987 | 0.41846     | 0.12865 | 0.237055  | no  |
| Acrbp  | 7.29262  | 7.60341 | 0.0602104   | 0.7777  | 0.86913   | no  |
| Acsbg1 | 54.9751  | 65.9338 | 0.262239    | 0.06415 | 0.133829  | no  |
| Acsf2  | 6.57195  | 6.97841 | 0.0865764   | 0.6207  | 0.756432  | no  |
| Acsf3  | 5.45376  | 6.21274 | 0.18798     | 0.32505 | 0.480244  | no  |
| Acsl4  | 21.454   | 20.9304 | -0.0356462  | 0.8052  | 0.887012  | no  |

|          |          |         |             |          |             |     |
|----------|----------|---------|-------------|----------|-------------|-----|
| AcsI5    | 58.331   | 56.665  | -0.0418049  | 0.7665   | 0.861524    | no  |
| Acss1    | 29.333   | 29.3116 | -0.00105242 | 0.9948   | 0.996551    | no  |
| Acss2    | 51.0866  | 36.9305 | -0.468134   | 0.0012   | 0.00423153  | yes |
| Actb     | 2799.83  | 2312.89 | -0.275643   | 0.1879   | 0.320208    | no  |
| Actg1    | 2442.13  | 2224.57 | -0.134612   | 0.5056   | 0.659562    | no  |
| ActI6a   | 36.4387  | 34.4329 | -0.081684   | 0.5787   | 0.722117    | no  |
| Actn1    | 41.5732  | 83.9081 | 1.01316     | 5.00E-05 | 0.000236281 | yes |
| Actn2    | 2.09469  | 4.6135  | 1.13913     | 5.00E-05 | 0.000236281 | yes |
| Actn4    | 106.06   | 94.988  | -0.159063   | 0.2671   | 0.414458    | no  |
| Actr10   | 24.9132  | 25.1683 | 0.0146981   | 0.9158   | 0.953785    | no  |
| Actr1a   | 77.729   | 69.3372 | -0.164823   | 0.2438   | 0.388712    | no  |
| Actr1b   | 35.3246  | 34.061  | -0.0525535  | 0.724    | 0.832541    | no  |
| Actr2    | 223.986  | 212.305 | -0.0772705  | 0.59765  | 0.737871    | no  |
| Actr3    | 734.031  | 683.295 | -0.103334   | 0.51645  | 0.669238    | no  |
| Actr5    | 15.1019  | 15.162  | 0.00572689  | 0.97075  | 0.984008    | no  |
| Actr6    | 11.5638  | 11.8498 | 0.0352487   | 0.8448   | 0.911458    | no  |
| Actr8    | 21.434   | 20.7672 | -0.0455899  | 0.76535  | 0.860738    | no  |
| Acvr1b   | 2.71913  | 3.53508 | 0.378599    | 0.0604   | 0.127596    | no  |
| Acy1     | 13.729   | 15.6262 | 0.186738    | 0.2806   | 0.430363    | no  |
| Acyp1    | 23.9245  | 26.406  | 0.142381    | 0.45515  | 0.612858    | no  |
| Acyp2    | 2.09063  | 1.90594 | -0.133438   | 0.76205  | 0.858559    | no  |
| Ada      | 3.31729  | 3.2327  | -0.0372663  | 0.8767   | 0.930935    | no  |
| Adal     | 5.66127  | 5.72823 | 0.0169631   | 0.9444   | 0.969834    | no  |
| Adam10   | 44.7283  | 43.4924 | -0.0404244  | 0.7772   | 0.868861    | no  |
| Adam15   | 2.93934  | 3.30536 | 0.169316    | 0.40725  | 0.56606     | no  |
| Adam17   | 35.6691  | 30.6949 | -0.216675   | 0.16795  | 0.29264     | no  |
| Adam19   | 49.5868  | 75.4729 | 0.606002    | 5.00E-05 | 0.000236281 | yes |
| Adam8    | 16.9139  | 24.9599 | 0.561401    | 2.00E-04 | 0.0008488   | yes |
| Adam9    | 3.81935  | 3.83027 | 0.00411858  | 0.9825   | 0.989933    | no  |
| Adamts10 | 82.9134  | 80.4215 | -0.0440238  | 0.758    | 0.855758    | no  |
| Adamts13 | 26.8367  | 10.1954 | -1.39629    | 5.00E-05 | 0.000236281 | yes |
| Adamts14 | 5.50986  | 5.31245 | -0.0526376  | 0.7483   | 0.8494      | no  |
| Adamts6  | 3.28796  | 3.55402 | 0.11226     | 0.5293   | 0.680443    | no  |
| Adap1    | 17.8444  | 17.7097 | -0.0109374  | 0.94145  | 0.968284    | no  |
| Adar     | 30.9483  | 32.0296 | 0.049543    | 0.7252   | 0.833364    | no  |
| Adarb2   | 1.08198  | 1.03372 | -0.0658347  | 0.79435  | 0.880156    | no  |
| Adat1    | 2.63244  | 2.32881 | -0.176805   | 0.42375  | 0.582093    | no  |
| Adat2    | 4.52705  | 4.36433 | -0.052812   | 0.8832   | 0.934631    | no  |
| Adat3    | 5.5691   | 6.6013  | 0.245305    | 0.6099   | 0.747568    | no  |
| Adck1    | 7.90468  | 8.8626  | 0.165022    | 0.34915  | 0.506457    | no  |
| Adck2    | 13.7592  | 14.4773 | 0.0733988   | 0.62835  | 0.762306    | no  |
| Adck3    | 2.25418  | 2.41375 | 0.0986695   | 0.6388   | 0.770718    | no  |
| Adck4    | 9.60803  | 11.9648 | 0.316487    | 0.05975  | 0.126489    | no  |
| Adck5    | 4.98585  | 5.06131 | 0.0216726   | 0.9713   | 0.984255    | no  |
| Adcy3    | 13.9923  | 15.2271 | 0.122009    | 0.5182   | 0.670607    | no  |
| Adcy6    | 0.450844 | 1.03391 | 1.19742     | 5.00E-05 | 0.000236281 | yes |
| Adcy7    | 115.996  | 123.185 | 0.0867551   | 0.5496   | 0.697721    | no  |
| Add1     | 93.6737  | 101.905 | 0.121506    | 0.38895  | 0.548082    | no  |
| Add3     | 105.006  | 101.035 | -0.0556089  | 0.7014   | 0.816826    | no  |
| Adh5     | 69.146   | 71.6273 | 0.0508648   | 0.72415  | 0.832646    | no  |
| Adi1     | 14.1321  | 16.0477 | 0.183393    | 0.27075  | 0.418667    | no  |
| Adipor1  | 64.2827  | 63.7643 | -0.0116812  | 0.93145  | 0.962557    | no  |
| Adipor2  | 30.1578  | 34.8254 | 0.207606    | 0.148    | 0.264272    | no  |
| Adk      | 6.07461  | 8.65112 | 0.510094    | 0.0106   | 0.0288545   | yes |
| Adnp     | 27.9394  | 27.3812 | -0.0291139  | 0.8393   | 0.907885    | no  |
| Adnp2    | 8.24247  | 8.18135 | -0.010738   | 0.9438   | 0.969593    | no  |
| Ado      | 4.77495  | 4.71082 | -0.0195048  | 0.908    | 0.949374    | no  |

|          |         |          |             |          |             |     |
|----------|---------|----------|-------------|----------|-------------|-----|
| Adora2a  | 39.2822 | 37.8246  | -0.0545476  | 0.70635  | 0.820533    | no  |
| Adpgk    | 11.1104 | 15.1045  | 0.443071    | 0.00665  | 0.0191807   | yes |
| Adprh    | 85.0958 | 77.0689  | -0.142938   | 0.32155  | 0.476419    | no  |
| Adprhl2  | 22.7577 | 22.5044  | -0.0161514  | 0.91785  | 0.955019    | no  |
| Adprm    | 25.3497 | 22.2738  | -0.186618   | 0.24785  | 0.3931      | no  |
| Adrb1    | 2.6297  | 1.40958  | -0.899635   | 0.001    | 0.00359708  | yes |
| Adrb2    | 15.753  | 13.546   | -0.217765   | 0.17465  | 0.301855    | no  |
| Adrbk1   | 276.119 | 283.279  | 0.0369376   | 0.8002   | 0.883821    | no  |
| Adrm1    | 67.6583 | 64.0093  | -0.0799846  | 0.58195  | 0.724903    | no  |
| Adsl     | 18.1415 | 18.9143  | 0.0601824   | 0.68415  | 0.804851    | no  |
| Adss     | 53.9159 | 53.5898  | -0.00875256 | 0.94955  | 0.972844    | no  |
| Aebp2    | 95.4212 | 97.1489  | 0.0258878   | 0.90255  | 0.946129    | no  |
| Aen      | 11.4119 | 15.2974  | 0.422755    | 0.0071   | 0.0203241   | yes |
| Aes      | 454.833 | 428.995  | -0.084376   | 0.5541   | 0.701528    | no  |
| Aff1     | 10.6652 | 9.85649  | -0.11377    | 0.43495  | 0.593081    | no  |
| Aff3     | 5.3951  | 10.5643  | 0.96947     | 5.00E-05 | 0.000236281 | yes |
| Aff4     | 10.8036 | 11.7296  | 0.118636    | 0.4091   | 0.568128    | no  |
| Afg3l1   | 19.1316 | 17.8568  | -0.0994898  | 0.493    | 0.647746    | no  |
| Afg3l2   | 23.3866 | 26.5338  | 0.182144    | 0.2134   | 0.353357    | no  |
| Afmid    | 19.7488 | 17.476   | -0.176386   | 0.35485  | 0.512451    | no  |
| Afp      | 1.22214 | 2.08873  | 0.773221    | 0.0092   | 0.0255019   | yes |
| Aftph    | 36.8972 | 37.1304  | 0.00909019  | 0.9498   | 0.972973    | no  |
| Aga      | 13.5396 | 14.6573  | 0.114434    | 0.51665  | 0.669362    | no  |
| Agap2    | 37.6662 | 38.916   | 0.047093    | 0.7367   | 0.841578    | no  |
| Agap3    | 16.6367 | 16.1226  | -0.0452867  | 0.7638   | 0.859817    | no  |
| Agbl5    | 5.37009 | 5.26199  | -0.0293387  | 0.92905  | 0.961217    | no  |
| Ager     | 2.63159 | 2.1887   | -0.26586    | 0.34925  | 0.506571    | no  |
| Agfg1    | 43.3301 | 52.0154  | 0.263569    | 0.062    | 0.130307    | no  |
| Agfg2    | 25.9663 | 20.1998  | -0.362301   | 0.0169   | 0.0430564   | yes |
| Aggf1    | 31.5746 | 29.9111  | -0.0780797  | 0.5899   | 0.731566    | no  |
| Agk      | 9.8477  | 10.8521  | 0.140119    | 0.4058   | 0.564823    | no  |
| Agl      | 1.445   | 1.25585  | -0.202413   | 0.28535  | 0.435651    | no  |
| Ago1     | 9.63022 | 9.16582  | -0.0713037  | 0.62865  | 0.762539    | no  |
| Ago2     | 16.2052 | 17.6304  | 0.12161     | 0.3902   | 0.549295    | no  |
| Ago3     | 2.4939  | 2.98608  | 0.259851    | 0.12615  | 0.233362    | no  |
| Agpat1   | 45.5935 | 47.3422  | 0.0542998   | 0.70525  | 0.819674    | no  |
| Agpat2   | 8.18923 | 8.26474  | 0.013242    | 0.94845  | 0.972239    | no  |
| Agpat3   | 51.5935 | 46.1391  | -0.161199   | 0.25465  | 0.3993      | no  |
| Agpat4   | 15.7781 | 17.7972  | 0.173726    | 0.2872   | 0.437746    | no  |
| Agpat5   | 5.0125  | 6.34802  | 0.340779    | 0.04725  | 0.103671    | no  |
| Agpat6   | 16.5902 | 16.8722  | 0.0243172   | 0.8649   | 0.923867    | no  |
| Agps     | 13.3712 | 15.2748  | 0.192027    | 0.18015  | 0.309534    | no  |
| Agrr     | 1.16171 | 1.39236  | 0.261285    | 0.2026   | 0.339448    | no  |
| Agtpbp1  | 10.3169 | 11.3137  | 0.133055    | 0.3919   | 0.550996    | no  |
| Agtr1a   | 4.74558 | 0        | #NAME?      | 5.00E-05 | 0.000236281 | yes |
| Agtrap   | 13.7565 | 16.5271  | 0.264716    | 0.0761   | 0.154033    | no  |
| Ahctf1   | 14.2872 | 15.4359  | 0.11157     | 0.4319   | 0.590085    | no  |
| Ahcy     | 53.3106 | 62.0535  | 0.219089    | 0.12     | 0.22423     | no  |
| Ahcyl1   | 26.5128 | 24.2101  | -0.131077   | 0.3678   | 0.526306    | no  |
| Ahcyl2   | 11.9263 | 12.4152  | 0.057953    | 0.6962   | 0.813455    | no  |
| Ahdc1    | 8.6786  | 9.32266  | 0.10328     | 0.48615  | 0.641373    | no  |
| Ahi1     | 2.99412 | 2.9163   | -0.0379911  | 0.8383   | 0.907358    | no  |
| Ahnak    | 242.67  | 241.111  | -0.00929626 | 0.9625   | 0.979895    | no  |
| Ahsa1    | 97.4636 | 89.4283  | -0.124132   | 0.38205  | 0.541114    | no  |
| Ahsa2    | 22.6897 | 22.1661  | -0.0336783  | 0.911    | 0.951116    | no  |
| AI182371 | 1.02227 | 0.668426 | -0.61293    | 0.13055  | 0.239873    | no  |
| AI314180 | 16.3142 | 16.1992  | -0.0102089  | 0.94435  | 0.969811    | no  |



|          |         |         |             |         |           |     |
|----------|---------|---------|-------------|---------|-----------|-----|
| AI413582 | 84.4926 | 82.702  | -0.0309034  | 0.83835 | 0.907358  | no  |
| AI462493 | 66.2154 | 70.5842 | 0.0921792   | 0.5471  | 0.695548  | no  |
| AI467606 | 71.6125 | 75.3199 | 0.0728181   | 0.6059  | 0.74441   | no  |
| AI597479 | 8.60187 | 7.64932 | -0.169318   | 0.30005 | 0.452379  | no  |
| AI837181 | 34.9878 | 35.7265 | 0.0301434   | 0.8376  | 0.906977  | no  |
| AI846148 | 9.1966  | 9.87389 | 0.102518    | 0.5717  | 0.716142  | no  |
| AI987944 | 7.63707 | 7.37138 | -0.0510846  | 0.76805 | 0.862565  | no  |
| Aifm1    | 16.8607 | 14.7983 | -0.18824    | 0.231   | 0.374419  | no  |
| Aifm2    | 1.03543 | 1.14366 | 0.143434    | 0.6734  | 0.79684   | no  |
| Aig1     | 3.05318 | 3.53919 | 0.213107    | 0.46895 | 0.625592  | no  |
| Aim1     | 31.5816 | 28.6051 | -0.142816   | 0.3146  | 0.468422  | no  |
| Aim1l    | 2.1258  | 1.74834 | -0.282024   | 0.17065 | 0.296429  | no  |
| Aim2     | 7.12068 | 7.90155 | 0.150121    | 0.3946  | 0.553843  | no  |
| Aimp1    | 78.7034 | 70.0964 | -0.167085   | 0.25065 | 0.396277  | no  |
| Aimp2    | 23.5548 | 22.2928 | -0.0794462  | 0.81415 | 0.892456  | no  |
| Aip      | 78.669  | 71.674  | -0.134345   | 0.60825 | 0.746168  | no  |
| AK010878 | 12.8489 | 14.7637 | 0.200403    | 0.5138  | 0.666686  | no  |
| Ak2      | 67.5544 | 70.1751 | 0.0549083   | 0.71505 | 0.826464  | no  |
| Ak3      | 55.4584 | 42.6029 | -0.380456   | 0.00955 | 0.0263592 | yes |
| Ak6      | 14.3082 | 15.3486 | 0.101268    | 0.7707  | 0.864414  | no  |
| Akap1    | 1.65911 | 2.27832 | 0.457555    | 0.03905 | 0.0882077 | no  |
| Akap10   | 16.1476 | 16.3802 | 0.0206381   | 0.88965 | 0.938235  | no  |
| Akap11   | 6.54071 | 6.67232 | 0.0287398   | 0.8439  | 0.91092   | no  |
| Akap12   | 2.6292  | 2.29402 | -0.196745   | 0.2805  | 0.430285  | no  |
| Akap13   | 50.7598 | 60.0578 | 0.242666    | 0.0939  | 0.183495  | no  |
| Akap8    | 65.3101 | 67.4107 | 0.0456714   | 0.74415 | 0.846718  | no  |
| Akap8l   | 43.5477 | 42.1686 | -0.0464282  | 0.7532  | 0.852466  | no  |
| Akap9    | 9.34298 | 11.364  | 0.282517    | 0.0467  | 0.102656  | no  |
| Akip1    | 18.3634 | 17.4373 | -0.0746597  | 0.68625 | 0.806301  | no  |
| Akirin1  | 58.0979 | 54.2142 | -0.0998158  | 0.48135 | 0.636993  | no  |
| Akirin2  | 31.1379 | 29.9566 | -0.0557979  | 0.8037  | 0.886148  | no  |
| Akna     | 153.689 | 169.658 | 0.142622    | 0.32995 | 0.485623  | no  |
| Akr1a1   | 214.495 | 201.559 | -0.0897417  | 0.5292  | 0.680352  | no  |
| Akr1b10  | 13.8651 | 13.0558 | -0.0867697  | 0.62765 | 0.761823  | no  |
| Akr1b3   | 22.318  | 22.1159 | -0.0131238  | 0.97245 | 0.98484   | no  |
| Akr1c13  | 21.799  | 26.8399 | 0.300115    | 0.0685  | 0.141242  | no  |
| Akr1e1   | 3.38893 | 3.37918 | -0.00415501 | 0.9878  | 0.992906  | no  |
| Akr7a5   | 6.04772 | 8.31745 | 0.459749    | 0.02095 | 0.0519313 | no  |
| Akt1     | 94.0435 | 92.3773 | -0.0257897  | 0.8575  | 0.919469  | no  |
| Akt1s1   | 9.06378 | 10.3954 | 0.197755    | 0.2855  | 0.435823  | no  |
| Akt2     | 71.1862 | 60.0876 | -0.244531   | 0.0849  | 0.168834  | no  |
| Akt3     | 6.6965  | 6.23427 | -0.103185   | 0.5207  | 0.672757  | no  |
| Aktip    | 10.476  | 8.92653 | -0.230922   | 0.67285 | 0.79639   | no  |
| Alad     | 5.51579 | 5.80055 | 0.0726229   | 0.6669  | 0.79207   | no  |
| Alas1    | 10.3237 | 11.2743 | 0.127076    | 0.4387  | 0.596776  | no  |
| Alcam    | 6.74092 | 6.78051 | 0.00844896  | 0.9574  | 0.977108  | no  |
| Aldh16a1 | 15.0989 | 13.6719 | -0.143229   | 0.48915 | 0.644151  | no  |
| Aldh18a1 | 24.661  | 24.9209 | 0.0151297   | 0.91725 | 0.954634  | no  |
| Aldh1b1  | 1.33343 | 1.34502 | 0.0124931   | 0.9779  | 0.987653  | no  |
| Aldh3a2  | 32.635  | 27.8268 | -0.229948   | 0.10775 | 0.205546  | no  |
| Aldh4a1  | 9.91828 | 9.81673 | -0.014848   | 0.92465 | 0.958829  | no  |
| Aldh6a1  | 1.68128 | 1.92636 | 0.196319    | 0.6433  | 0.774162  | no  |
| Aldh7a1  | 3.78882 | 2.96801 | -0.352253   | 0.3563  | 0.514113  | no  |
| Aldh9a1  | 26.4861 | 27.9137 | 0.0757347   | 0.60145 | 0.741046  | no  |
| Aldoa    | 263.757 | 265.33  | 0.00857664  | 0.95055 | 0.973444  | no  |
| Aldoc    | 1.45919 | 2.01814 | 0.467853    | 0.12495 | 0.231549  | no  |
| Alg1     | 14.1159 | 15.3534 | 0.121241    | 0.57735 | 0.720993  | no  |

|          |         |          |             |          |             |     |
|----------|---------|----------|-------------|----------|-------------|-----|
| Alg10b   | 18.425  | 18.2694  | -0.0122329  | 0.9361   | 0.965285    | no  |
| Alg11    | 2.60299 | 2.5361   | -0.0375584  | 0.8417   | 0.909559    | no  |
| Alg12    | 15.5645 | 15.6176  | 0.00491341  | 0.9766   | 0.987018    | no  |
| Alg13    | 3.78126 | 4.38136  | 0.212513    | 0.34965  | 0.506995    | no  |
| Alg14    | 4.91078 | 3.85871  | -0.347836   | 0.22145  | 0.363041    | no  |
| Alg2     | 3.87563 | 4.02199  | 0.0534805   | 0.77695  | 0.86869     | no  |
| Alg3     | 11.5041 | 11.0724  | -0.0551781  | 0.76605  | 0.86121     | no  |
| Alg5     | 31.9976 | 32.3096  | 0.0140007   | 0.92555  | 0.959382    | no  |
| Alg6     | 2.80064 | 2.23831  | -0.323346   | 0.13685  | 0.249011    | no  |
| Alg8     | 7.54389 | 6.44967  | -0.226084   | 0.2305   | 0.373978    | no  |
| Alg9     | 6.32196 | 6.33224  | 0.00234326  | 0.98945  | 0.993716    | no  |
| Alkbh1   | 15.4289 | 15.7967  | 0.0339935   | 0.92105  | 0.957064    | no  |
| Alkbh2   | 5.68727 | 5.28524  | -0.105769   | 0.6703   | 0.79467     | no  |
| Alkbh3   | 19.7471 | 20.9962  | 0.0884909   | 0.6088   | 0.746674    | no  |
| Alkbh4   | 15.9291 | 16.1957  | 0.0239499   | 0.88255  | 0.934265    | no  |
| Alkbh5   | 23.7138 | 24.0343  | 0.0193667   | 0.89375  | 0.94062     | no  |
| Alkbh6   | 15.9365 | 16.9242  | 0.0867574   | 0.63865  | 0.770603    | no  |
| Alkbh7   | 9.78168 | 10.8777  | 0.153214    | 0.47695  | 0.633093    | no  |
| Alkbh8   | 6.75094 | 7.54447  | 0.16033     | 0.38095  | 0.539913    | no  |
| Alms1    | 1.08111 | 0.706492 | -0.613767   | 0.00385  | 0.0118893   | yes |
| Als2     | 5.6534  | 5.64529  | -0.00207083 | 0.99055  | 0.994241    | no  |
| Als2cl   | 1.16252 | 0.515385 | -1.17353    | 1.00E-04 | 0.000450026 | yes |
| Alyref   | 62.9918 | 56.3848  | -0.159858   | 0.2826   | 0.432556    | no  |
| Alyref2  | 8.71649 | 7.83934  | -0.153015   | 0.45685  | 0.614362    | no  |
| Ambra1   | 16.9245 | 16.321   | -0.0523841  | 0.7159   | 0.826999    | no  |
| Amd1     | 3.43043 | 3.25377  | -0.076276   | 0.91805  | 0.95517     | no  |
| Amd2     | 8.141   | 9.07011  | 0.155913    | 0.777    | 0.868719    | no  |
| Amdhd2   | 22.8806 | 22.9805  | 0.0062849   | 0.96895  | 0.983186    | no  |
| Amfr     | 52.0395 | 50.6917  | -0.0378578  | 0.78625  | 0.874889    | no  |
| Amica1   | 34.6405 | 42.417   | 0.292183    | 0.06325  | 0.132284    | no  |
| Amigo1   | 1.21234 | 1.06133  | -0.191913   | 0.3956   | 0.554695    | no  |
| Amigo3   | 3.47028 | 3.81637  | 0.137151    | 0.8263   | 0.900293    | no  |
| Ammecr1  | 3.75332 | 3.97328  | 0.0821643   | 0.6702   | 0.794599    | no  |
| Ammecr1l | 11.6524 | 11.2813  | -0.0466951  | 0.7559   | 0.854385    | no  |
| Amn1     | 4.96496 | 4.87086  | -0.0276047  | 0.9195   | 0.956073    | no  |
| Ampd2    | 16.3292 | 17.0945  | 0.0660843   | 0.65445  | 0.782802    | no  |
| Amz2     | 9.37623 | 10.4715  | 0.159388    | 0.32415  | 0.479255    | no  |
| Anapc1   | 21.5083 | 22.0635  | 0.0367717   | 0.79785  | 0.882289    | no  |
| Anapc10  | 5.62756 | 4.84158  | -0.217031   | 0.2415   | 0.386065    | no  |
| Anapc11  | 19.1092 | 18.4859  | -0.0478412  | 0.74265  | 0.845624    | no  |
| Anapc13  | 114.278 | 102.442  | -0.157734   | 0.35525  | 0.512902    | no  |
| Anapc15  | 28.2497 | 22.672   | -0.317323   | 0.0745   | 0.151281    | no  |
| Anapc16  | 43.7417 | 39.5096  | -0.146805   | 0.41625  | 0.574879    | no  |
| Anapc2   | 41.2577 | 38.5449  | -0.0981223  | 0.49015  | 0.645155    | no  |
| Anapc4   | 29.0201 | 28.0569  | -0.0486954  | 0.73435  | 0.839777    | no  |
| Anapc5   | 98.649  | 80.9025  | -0.286121   | 0.04515  | 0.0997989   | no  |
| Anapc7   | 22.0312 | 19.7397  | -0.158445   | 0.2911   | 0.442049    | no  |
| Angel1   | 2.17463 | 3.01034  | 0.469159    | 0.02195  | 0.054091    | no  |
| Angel2   | 30.8811 | 31.3965  | 0.0238788   | 0.8712   | 0.927663    | no  |
| Angptl4  | 1.90551 | 2.00115  | 0.070653    | 0.79745  | 0.882095    | no  |
| Angptl6  | 2.74099 | 2.81226  | 0.0370342   | 0.92945  | 0.961433    | no  |
| Ank      | 20.1129 | 20.9436  | 0.0583841   | 0.6913   | 0.809942    | no  |
| Ankfy1   | 17.7229 | 17.3652  | -0.0294159  | 0.834    | 0.904856    | no  |
| Ankhd1   | 20.2087 | 20.6246  | 0.0293913   | 0.83455  | 0.905188    | no  |
| Ankib1   | 21.8116 | 20.84    | -0.0657388  | 0.6449   | 0.7754      | no  |
| Ankle1   | 3.91469 | 3.00622  | -0.380947   | 0.0908   | 0.178559    | no  |
| Ankle2   | 12.2592 | 13.5075  | 0.139899    | 0.3506   | 0.507986    | no  |

|          |         |          |             |          |             |     |
|----------|---------|----------|-------------|----------|-------------|-----|
| Ankmy2   | 14.2039 | 13.7542  | -0.0464123  | 0.76735  | 0.862081    | no  |
| Ankra2   | 21.0273 | 18.0314  | -0.221748   | 0.1619   | 0.284288    | no  |
| Ankrd10  | 60.6975 | 60.726   | 0.000676483 | 0.9951   | 0.996682    | no  |
| Ankrd11  | 59.402  | 59.8909  | 0.0118256   | 0.9327   | 0.963294    | no  |
| Ankrd12  | 14.8994 | 18.166   | 0.285995    | 0.04195  | 0.0937532   | no  |
| Ankrd13a | 97.5172 | 105.862  | 0.118457    | 0.4059   | 0.564884    | no  |
| Ankrd13b | 1.72467 | 2.39323  | 0.472636    | 0.04105  | 0.0920157   | no  |
| Ankrd13c | 21.2727 | 20.5851  | -0.0474061  | 0.7506   | 0.850943    | no  |
| Ankrd13d | 5.58082 | 7.46587  | 0.419835    | 0.02765  | 0.0659032   | no  |
| Ankrd16  | 13.2696 | 12.5185  | -0.0840646  | 0.6033   | 0.742402    | no  |
| Ankrd17  | 19.4312 | 20.2351  | 0.0584848   | 0.68305  | 0.803852    | no  |
| Ankrd23  | 8.2797  | 8.61338  | 0.057001    | 0.751    | 0.851219    | no  |
| Ankrd26  | 3.34735 | 3.14084  | -0.091873   | 0.59895  | 0.738933    | no  |
| Ankrd27  | 18.8331 | 18.7771  | -0.00429623 | 0.9752   | 0.98638     | no  |
| Ankrd28  | 7.49735 | 7.43673  | -0.0117131  | 0.94105  | 0.96807     | no  |
| Ankrd29  | 1.10097 | 0.992557 | -0.149554   | 0.59125  | 0.732493    | no  |
| Ankrd32  | 5.2802  | 5.18818  | -0.0253631  | 0.88855  | 0.937538    | no  |
| Ankrd37  | 3.16226 | 3.63479  | 0.200917    | 0.7116   | 0.824109    | no  |
| Ankrd39  | 8.92715 | 9.28606  | 0.0568663   | 0.75835  | 0.856044    | no  |
| Ankrd40  | 29.0163 | 29.3785  | 0.0178981   | 0.90475  | 0.94752     | no  |
| Ankrd44  | 83.819  | 82.7882  | -0.0178516  | 0.90125  | 0.94537     | no  |
| Ankrd46  | 14.2698 | 14.445   | 0.0175992   | 0.90995  | 0.950442    | no  |
| Ankrd49  | 6.94277 | 8.67928  | 0.322064    | 0.08925  | 0.176006    | no  |
| Ankrd50  | 6.04476 | 5.90387  | -0.0340248  | 0.83455  | 0.905188    | no  |
| Ankrd52  | 20.0711 | 18.9107  | -0.0859148  | 0.5437   | 0.692672    | no  |
| Ankrd54  | 27.6573 | 30.4984  | 0.141073    | 0.35625  | 0.514052    | no  |
| Ankrd9   | 1.65567 | 1.71035  | 0.046876    | 0.86105  | 0.92154     | no  |
| Anks1    | 7.09917 | 7.66251  | 0.110166    | 0.47295  | 0.629453    | no  |
| Anks3    | 19.9719 | 20.2113  | 0.0171955   | 0.91045  | 0.950781    | no  |
| Ankzf1   | 15.7237 | 18.9174  | 0.266772    | 0.18595  | 0.317444    | no  |
| Anln     | 3.85371 | 1.9083   | -1.01396    | 5.00E-05 | 0.000236281 | yes |
| Ano10    | 16.1989 | 27.3807  | 0.757266    | 5.00E-05 | 0.000236281 | yes |
| Ano6     | 20.7325 | 19.0441  | -0.122552   | 0.38855  | 0.547682    | no  |
| Ano8     | 18.148  | 18.5396  | 0.0307989   | 0.90085  | 0.945076    | no  |
| Anp32a   | 147.958 | 156.885  | 0.0845196   | 0.5547   | 0.701998    | no  |
| Anp32b   | 250.831 | 214.445  | -0.226111   | 0.11295  | 0.213452    | no  |
| Anp32e   | 86.4157 | 72.6081  | -0.251162   | 0.07855  | 0.158126    | no  |
| Antxr2   | 20.5249 | 21.594   | 0.0732575   | 0.6088   | 0.746674    | no  |
| Anxa1    | 90.2939 | 119.982  | 0.410117    | 0.00485  | 0.0145831   | yes |
| Anxa11   | 86.9275 | 92.5648  | 0.0906511   | 0.5224   | 0.674299    | no  |
| Anxa2    | 376.618 | 370.59   | -0.0232775  | 0.8717   | 0.927887    | no  |
| Anxa4    | 16.8472 | 9.59658  | -0.811918   | 5.00E-05 | 0.000236281 | yes |
| Anxa5    | 53.8285 | 61.5817  | 0.194132    | 0.1775   | 0.3058      | no  |
| Anxa6    | 778.821 | 760.934  | -0.0335205  | 0.83695  | 0.906579    | no  |
| Anxa7    | 44.2874 | 45.2188  | 0.0300259   | 0.82905  | 0.9018      | no  |
| Anxa9    | 1.29907 | 1.1326   | -0.197834   | 0.79655  | 0.881556    | no  |
| Aoc2     | 5.12596 | 5.67674  | 0.147241    | 0.4346   | 0.592764    | no  |
| Ap1ar    | 29.6867 | 31.0627  | 0.0653623   | 0.65215  | 0.781071    | no  |
| Ap1b1    | 47.455  | 48.6679  | 0.036411    | 0.80325  | 0.885873    | no  |
| Ap1g1    | 18.2451 | 17.9648  | -0.0223365  | 0.8745   | 0.929494    | no  |
| Ap1g2    | 54.2684 | 49.9717  | -0.119002   | 0.4613   | 0.618402    | no  |
| Ap1m1    | 87.138  | 83.2267  | -0.0662561  | 0.63625  | 0.76864     | no  |
| Ap1s1    | 47.3155 | 44.1742  | -0.0991099  | 0.5131   | 0.666169    | no  |
| Ap1s2    | 38.6854 | 33.211   | -0.220125   | 0.13375  | 0.244581    | no  |
| Ap1s3    | 10.938  | 12.1848  | 0.155742    | 0.3221   | 0.477003    | no  |
| Ap2a1    | 34.3162 | 34.1519  | -0.0069246  | 0.964    | 0.980433    | no  |
| Ap2a2    | 21.1756 | 20.7329  | -0.0304862  | 0.83445  | 0.905176    | no  |

|         |          |          |             |          |             |     |
|---------|----------|----------|-------------|----------|-------------|-----|
| Ap2b1   | 47.374   | 45.1322  | -0.0699403  | 0.616    | 0.752796    | no  |
| Ap2m1   | 159.055  | 147.645  | -0.107394   | 0.45635  | 0.613876    | no  |
| Ap2s1   | 211.146  | 188.713  | -0.162043   | 0.2582   | 0.403612    | no  |
| Ap3b1   | 37.4897  | 36.3793  | -0.0433778  | 0.75395  | 0.853001    | no  |
| Ap3d1   | 56.5663  | 56.9036  | 0.00857686  | 0.95335  | 0.975024    | no  |
| Ap3m1   | 16.6928  | 15.3442  | -0.121529   | 0.4054   | 0.564389    | no  |
| Ap3m2   | 15.5777  | 16.9411  | 0.121052    | 0.41795  | 0.576561    | no  |
| Ap3s1   | 65.3703  | 69.4848  | 0.0880612   | 0.53995  | 0.689513    | no  |
| Ap3s2   | 8.93638  | 8.82658  | -0.0178359  | 0.90745  | 0.949052    | no  |
| Ap4b1   | 16.21    | 15.1376  | -0.0987459  | 0.51455  | 0.667389    | no  |
| Ap4e1   | 8.34057  | 8.19272  | -0.025802   | 0.86685  | 0.924942    | no  |
| Ap4m1   | 9.50717  | 10.0655  | 0.0823275   | 0.8008   | 0.884193    | no  |
| Ap4s1   | 24.4481  | 24.3724  | -0.00447771 | 0.98585  | 0.991766    | no  |
| Ap5b1   | 6.40779  | 5.99838  | -0.0952535  | 0.58615  | 0.728348    | no  |
| Ap5m1   | 18.2346  | 15.9747  | -0.190884   | 0.43365  | 0.591891    | no  |
| Ap5s1   | 8.11366  | 8.41632  | 0.0528379   | 0.78955  | 0.877137    | no  |
| Ap5z1   | 16.2453  | 16.9231  | 0.0589733   | 0.6929   | 0.81109     | no  |
| Apaf1   | 23.0015  | 20.6044  | -0.158774   | 0.2619   | 0.408058    | no  |
| Apba3   | 11.7907  | 12.6561  | 0.102183    | 0.6113   | 0.748686    | no  |
| Apbb1   | 2.52367  | 2.16921  | -0.218351   | 0.33875  | 0.495137    | no  |
| Apbb1ip | 156.702  | 132.787  | -0.238913   | 0.0914   | 0.179479    | no  |
| Apbb3   | 13.0103  | 12.186   | -0.09443    | 0.75225  | 0.851938    | no  |
| Apc     | 9.36992  | 9.74466  | 0.0565739   | 0.69425  | 0.811997    | no  |
| Apeh    | 51.7854  | 54.1511  | 0.0644461   | 0.65365  | 0.782283    | no  |
| Apex1   | 3.99073  | 5.49295  | 0.46093     | 0.2875   | 0.438043    | no  |
| Apex2   | 7.48731  | 6.90836  | -0.116104   | 0.53815  | 0.687986    | no  |
| Aph1a   | 42.2214  | 39.4815  | -0.0967991  | 0.50395  | 0.65803     | no  |
| Api5    | 48.1059  | 44.8865  | -0.0999298  | 0.47375  | 0.630149    | no  |
| Apip    | 8.93305  | 10.497   | 0.23275     | 0.29375  | 0.445153    | no  |
| Apitd1  | 7.62829  | 4.38672  | -0.798218   | 0.00265  | 0.0085599   | yes |
| Apif    | 2.36494  | 1.76793  | -0.419746   | 0.0679   | 0.140173    | no  |
| Apip1   | 2.81283  | 2.61043  | -0.107733   | 0.6409   | 0.772222    | no  |
| Apip2   | 36.2013  | 36.5696  | 0.0146057   | 0.9197   | 0.956211    | no  |
| Apmap   | 26.5708  | 24.9618  | -0.0901162  | 0.55235  | 0.700016    | no  |
| Apoa1bp | 41.5214  | 38.1024  | -0.123972   | 0.44875  | 0.606137    | no  |
| Apoa2   | 1.32471  | 0.537444 | -1.30149    | 0.136    | 0.247707    | no  |
| Apobec1 | 3.814    | 3.21871  | -0.24482    | 0.257    | 0.402119    | no  |
| Apobec2 | 29.8372  | 14.8298  | -1.00861    | 5.00E-05 | 0.000236281 | yes |
| Apobec3 | 94.4338  | 104.502  | 0.146152    | 0.3039   | 0.456711    | no  |
| Apobr   | 17.0122  | 11.655   | -0.54562    | 3.00E-04 | 0.00122185  | yes |
| Apoe    | 1.7707   | 2.40695  | 0.442892    | 0.1707   | 0.296487    | no  |
| Apol8   | 1.2925   | 1.66146  | 0.362293    | 0.24655  | 0.391725    | no  |
| Apoo    | 7.04058  | 7.57494  | 0.105539    | 0.6919   | 0.810403    | no  |
| Apool   | 17.8094  | 17.6387  | -0.0138915  | 0.9408   | 0.967968    | no  |
| Apopt1  | 37.5779  | 40.277   | 0.10007     | 0.5401   | 0.689629    | no  |
| App     | 0.605287 | 2.79456  | 2.20693     | 5.00E-05 | 0.000236281 | yes |
| Appbp2  | 15.0559  | 16.0487  | 0.0921268   | 0.5629   | 0.708779    | no  |
| Appl1   | 17.967   | 19.4674  | 0.11571     | 0.41125  | 0.57016     | no  |
| Appl2   | 11.6069  | 18.791   | 0.695056    | 5.00E-05 | 0.000236281 | yes |
| Aprt    | 90.3067  | 89.9631  | -0.0054993  | 0.9688   | 0.98309     | no  |
| Aptx    | 3.01941  | 2.95915  | -0.0290842  | 0.8724   | 0.928391    | no  |
| Aqp3    | 8.57153  | 16.5319  | 0.947632    | 5.00E-05 | 0.000236281 | yes |
| Aqp9    | 5.60765  | 4.9419   | -0.18233    | 0.33135  | 0.487033    | no  |
| Aqr     | 45.4105  | 40.8868  | -0.15139    | 0.2806   | 0.430363    | no  |
| Ar      | 1.41132  | 2.12293  | 0.589014    | 0.0187   | 0.0470228   | yes |
| Araf    | 54.5392  | 55.6721  | 0.0296607   | 0.8447   | 0.911421    | no  |
| Arap1   | 26.644   | 27.7308  | 0.0576765   | 0.6844   | 0.805052    | no  |

|           |          |         |              |          |             |     |
|-----------|----------|---------|--------------|----------|-------------|-----|
| Arap2     | 29.4133  | 25.0974 | -0.228932    | 0.10725  | 0.204714    | no  |
| Arap3     | 1.63786  | 2.35429 | 0.523481     | 0.00915  | 0.0253792   | yes |
| Arc       | 4.06918  | 2.85463 | -0.511435    | 0.01105  | 0.0299157   | yes |
| Arcn1     | 67.9111  | 66.7087 | -0.0257722   | 0.8573   | 0.919339    | no  |
| Arel1     | 21.9026  | 21.7931 | -0.00723361  | 0.9595   | 0.978196    | no  |
| Arf1      | 253.673  | 235.642 | -0.106372    | 0.452    | 0.609477    | no  |
| Arf2      | 8.26639  | 7.9432  | -0.0575366   | 0.7395   | 0.843398    | no  |
| Arf3      | 64.0445  | 67.8027 | 0.0822699    | 0.55885  | 0.705605    | no  |
| Arf4      | 67.3775  | 60.3718 | -0.158394    | 0.268    | 0.415462    | no  |
| Arf5      | 204.487  | 196.16  | -0.0599782   | 0.6637   | 0.789638    | no  |
| Arf6      | 150.025  | 129.02  | -0.217609    | 0.1285   | 0.236821    | no  |
| Arfgap1   | 24.2907  | 23.4391 | -0.0514871   | 0.7278   | 0.835088    | no  |
| Arfgap2   | 40.3346  | 41.4115 | 0.0380153    | 0.79035  | 0.877736    | no  |
| Arfgap3   | 5.97685  | 5.63553 | -0.0848337   | 0.64555  | 0.775838    | no  |
| Arfgef1   | 29.5295  | 32.3872 | 0.133269     | 0.34305  | 0.499828    | no  |
| Arfgef2   | 11.3583  | 11.2334 | -0.0159533   | 0.90825  | 0.949439    | no  |
| Arfip1    | 19.5227  | 17.7256 | -0.13932     | 0.3546   | 0.512163    | no  |
| Arfip2    | 12.4265  | 12.9902 | 0.0640057    | 0.6805   | 0.802095    | no  |
| Arfrp1    | 32.4181  | 29.3325 | -0.144304    | 0.54895  | 0.697121    | no  |
| Arglu1    | 84.227   | 86.2468 | 0.0341882    | 0.8058   | 0.887382    | no  |
| Arhgap1   | 57.3422  | 51.5194 | -0.154481    | 0.27445  | 0.423119    | no  |
| Arhgap10  | 12.8505  | 12.1485 | -0.0810402   | 0.6123   | 0.749586    | no  |
| Arhgap11a | 13.566   | 9.56308 | -0.50445     | 0.00135  | 0.00470245  | yes |
| Arhgap12  | 8.01503  | 7.95379 | -0.0110661   | 0.9404   | 0.967782    | no  |
| Arhgap15  | 60.8133  | 66.3989 | 0.126772     | 0.3694   | 0.527975    | no  |
| Arhgap17  | 26.1589  | 21.062  | -0.31266     | 0.03185  | 0.0742245   | no  |
| Arhgap18  | 13.6562  | 12.8014 | -0.0932481   | 0.5381   | 0.687959    | no  |
| Arhgap19  | 10.9287  | 6.55285 | -0.737934    | 5.00E-05 | 0.000236281 | yes |
| Arhgap21  | 1.23439  | 2.66694 | 1.11138      | 5.00E-05 | 0.000236281 | yes |
| Arhgap25  | 45.6786  | 41.1378 | -0.151052    | 0.28385  | 0.433971    | no  |
| Arhgap26  | 17.2397  | 16.7482 | -0.0417343   | 0.7693   | 0.86342     | no  |
| Arhgap27  | 40.7704  | 43.308  | 0.0871119    | 0.5733   | 0.717548    | no  |
| Arhgap30  | 158.344  | 157.689 | -0.00597125  | 0.96775  | 0.982463    | no  |
| Arhgap31  | 5.51424  | 5.67135 | 0.0405315    | 0.79195  | 0.878683    | no  |
| Arhgap33  | 2.98304  | 1.98188 | -0.589913    | 0.00305  | 0.00969839  | yes |
| Arhgap39  | 1.83348  | 1.80533 | -0.0223226   | 0.91605  | 0.953947    | no  |
| Arhgap4   | 176.389  | 173.735 | -0.0218719   | 0.8798   | 0.932627    | no  |
| Arhgap5   | 0.823577 | 1.02771 | 0.319465     | 0.19935  | 0.335292    | no  |
| Arhgap9   | 184.145  | 188.874 | 0.0365811    | 0.79615  | 0.881293    | no  |
| Arhgdia   | 289.589  | 279.64  | -0.0504338   | 0.7255   | 0.8336      | no  |
| Arhgdib   | 1603.95  | 1519.43 | -0.0781001   | 0.6163   | 0.753033    | no  |
| Arhgef1   | 457.407  | 444.236 | -0.0421516   | 0.7837   | 0.873167    | no  |
| Arhgef11  | 1.22098  | 1.3289  | 0.12219      | 0.6095   | 0.747259    | no  |
| Arhgef12  | 4.77491  | 5.57267 | 0.222894     | 0.1431   | 0.257253    | no  |
| Arhgef18  | 79.224   | 74.6718 | -0.0853727   | 0.5432   | 0.692323    | no  |
| Arhgef2   | 87.7429  | 84.8392 | -0.0485519   | 0.73255  | 0.838548    | no  |
| Arhgef25  | 0.839682 | 1.0238  | 0.286022     | 0.39615  | 0.555146    | no  |
| Arhgef3   | 113.666  | 101.623 | -0.161574    | 0.26415  | 0.410856    | no  |
| Arhgef39  | 2.22047  | 2.7669  | 0.31741      | 0.2441   | 0.389085    | no  |
| Arhgef4   | 11.4543  | 9.21816 | -0.313337    | 0.05905  | 0.125199    | no  |
| Arhgef6   | 57.7761  | 54.6214 | -0.0810072   | 0.565    | 0.710587    | no  |
| Arhgef7   | 16.5769  | 15.7521 | -0.0736302   | 0.6174   | 0.75392     | no  |
| Arid1a    | 63.6087  | 70.2341 | 0.142947     | 0.314    | 0.467796    | no  |
| Arid1b    | 9.06883  | 9.37996 | 0.048666     | 0.73075  | 0.837264    | no  |
| Arid2     | 10.6711  | 12.8536 | 0.26846      | 0.0615   | 0.129452    | no  |
| Arid3a    | 4.56626  | 4.62671 | 0.0189737    | 0.90545  | 0.947916    | no  |
| Arid3b    | 18.8364  | 18.8323 | -0.000315212 | 0.9985   | 0.998741    | no  |

|         |         |         |             |         |            |     |
|---------|---------|---------|-------------|---------|------------|-----|
| Arid4a  | 21.9104 | 23.0268 | 0.071698    | 0.6188  | 0.754963   | no  |
| Arid4b  | 16.9301 | 19.4825 | 0.202589    | 0.15595 | 0.275774   | no  |
| Arid5a  | 23.1054 | 25.1189 | 0.120547    | 0.4028  | 0.5618     | no  |
| Arid5b  | 8.58706 | 9.31563 | 0.11749     | 0.4432  | 0.600986   | no  |
| Arih1   | 32.3569 | 31.1389 | -0.0553524  | 0.7021  | 0.817251   | no  |
| Arih2   | 30.4933 | 30.7939 | 0.0141526   | 0.9244  | 0.958767   | no  |
| Arl1    | 62.5398 | 54.6475 | -0.194621   | 0.2076  | 0.345879   | no  |
| Arl10   | 3.00992 | 4.148   | 0.46269     | 0.10915 | 0.207689   | no  |
| Arl13b  | 4.72015 | 5.35304 | 0.181528    | 0.3006  | 0.453024   | no  |
| Arl14ep | 6.83255 | 7.00201 | 0.0353439   | 0.8357  | 0.905837   | no  |
| Arl15   | 5.66258 | 4.00026 | -0.501365   | 0.00675 | 0.0194405  | yes |
| Arl16   | 7.70405 | 7.06763 | -0.124392   | 0.6468  | 0.776878   | no  |
| Arl2    | 8.18744 | 7.14462 | -0.196555   | 0.42265 | 0.581057   | no  |
| Arl2bp  | 109.046 | 96.4153 | -0.1776     | 0.20455 | 0.341879   | no  |
| Arl3    | 17.4139 | 16.7799 | -0.0535045  | 0.7811  | 0.87126    | no  |
| Arl4a   | 11.1293 | 11.0626 | -0.00867187 | 0.954   | 0.975307   | no  |
| Arl4c   | 240.564 | 234.074 | -0.0394562  | 0.79045 | 0.877778   | no  |
| Arl4d   | 51.1141 | 57.202  | 0.162344    | 0.2618  | 0.407956   | no  |
| Arl5a   | 29.7036 | 23.2157 | -0.355539   | 0.0124  | 0.0330034  | yes |
| Arl5b   | 3.39307 | 3.56904 | 0.072944    | 0.70125 | 0.816773   | no  |
| Arl5c   | 90.4415 | 77.8502 | -0.216283   | 0.1284  | 0.236668   | no  |
| Arl6    | 1.02807 | 1.52532 | 0.569167    | 0.117   | 0.219724   | no  |
| Arl6ip1 | 213.087 | 200.689 | -0.0864791  | 0.54065 | 0.690082   | no  |
| Arl6ip4 | 50.3902 | 48.2065 | -0.0639159  | 0.6718  | 0.795654   | no  |
| Arl6ip5 | 441.085 | 394.832 | -0.159817   | 0.26955 | 0.417315   | no  |
| Arl6ip6 | 10.3726 | 10.1255 | -0.0347799  | 0.83085 | 0.902951   | no  |
| Arl8a   | 32.7285 | 31.6703 | -0.0474197  | 0.7546  | 0.853503   | no  |
| Arl8b   | 25.3488 | 22.9558 | -0.143058   | 0.3283  | 0.48382    | no  |
| Armc1   | 19.341  | 17.1514 | -0.173333   | 0.2472  | 0.392422   | no  |
| Armc10  | 54.1712 | 49.1713 | -0.139709   | 0.3342  | 0.490161   | no  |
| Armc3   | 1.95884 | 1.65149 | -0.246231   | 0.3074  | 0.460598   | no  |
| Armc5   | 15.3618 | 15.1475 | -0.0202681  | 0.8976  | 0.943223   | no  |
| Armc6   | 5.47844 | 4.59633 | -0.253285   | 0.5223  | 0.674207   | no  |
| Armc7   | 120.737 | 95.4173 | -0.339545   | 0.04025 | 0.0905157  | no  |
| Armc8   | 11.5624 | 11.6066 | 0.00550363  | 0.97105 | 0.984157   | no  |
| Armc9   | 1.10879 | 1.40327 | 0.339801    | 0.26625 | 0.413348   | no  |
| Armcx2  | 1.66846 | 2.07899 | 0.317367    | 0.162   | 0.284442   | no  |
| Armcx3  | 1.92355 | 1.93119 | 0.00571882  | 0.9879  | 0.992965   | no  |
| Armcx5  | 6.54577 | 6.43088 | -0.0255472  | 0.91225 | 0.9519     | no  |
| Arnt    | 14.851  | 14.4182 | -0.0426769  | 0.7758  | 0.867913   | no  |
| Arntl   | 19.9385 | 20.9191 | 0.0692622   | 0.641   | 0.77229    | no  |
| Arpc1a  | 57.7624 | 70.2283 | 0.281921    | 0.0529  | 0.114005   | no  |
| Arpc1b  | 622.909 | 564.286 | -0.142596   | 0.3346  | 0.490544   | no  |
| Arpc2   | 685.417 | 636.097 | -0.107734   | 0.46495 | 0.62196    | no  |
| Arpc3   | 511.308 | 495.171 | -0.0462678  | 0.74465 | 0.847027   | no  |
| Arpc4   | 170.371 | 162.607 | -0.0672899  | 0.64555 | 0.775838   | no  |
| Arpc5   | 384.126 | 351.839 | -0.126667   | 0.3759  | 0.534645   | no  |
| Arpc5l  | 115.032 | 92.7191 | -0.3111     | 0.02985 | 0.0702924  | no  |
| Arpp19  | 19.3972 | 18.481  | -0.0698092  | 0.62175 | 0.757188   | no  |
| Arrb1   | 1.83343 | 1.79566 | -0.030027   | 0.8723  | 0.92833    | no  |
| Arrb2   | 184.981 | 207.221 | 0.163795    | 0.2562  | 0.401152   | no  |
| Arrdc1  | 89.454  | 84.7279 | -0.0783092  | 0.57355 | 0.717733   | no  |
| Arrdc2  | 9.69915 | 10.24   | 0.0782866   | 0.63575 | 0.768246   | no  |
| Arrdc3  | 17.144  | 20.1329 | 0.231849    | 0.11065 | 0.210056   | no  |
| Arsa    | 6.61223 | 6.99362 | 0.0809028   | 0.63305 | 0.766217   | no  |
| Arsb    | 50.841  | 37.5852 | -0.435828   | 0.00225 | 0.00740543 | yes |
| Arsk    | 3.294   | 3.6563  | 0.150541    | 0.4194  | 0.577929   | no  |

|          |          |          |            |          |             |     |
|----------|----------|----------|------------|----------|-------------|-----|
| Art2a-ps | 1.22784  | 0.40598  | -1.59664   | 0.0139   | 0.0363906   | yes |
| Art2b    | 13.4022  | 5.23785  | -1.35543   | 5.00E-05 | 0.000236281 | yes |
| Arv1     | 5.58109  | 6.46427  | 0.21194    | 0.36505  | 0.523422    | no  |
| Arxes2   | 0.879933 | 1.45717  | 0.727705   | 0.0528   | 0.113832    | no  |
| As3mt    | 40.6145  | 10.4068  | -1.96447   | 5.00E-05 | 0.000236281 | yes |
| Asah1    | 14.257   | 13.3278  | -0.0972365 | 0.5489   | 0.697083    | no  |
| Asap1    | 17.4018  | 16.6595  | -0.0628922 | 0.667    | 0.792141    | no  |
| Asap2    | 1.68917  | 0.827109 | -1.03016   | 0.0348   | 0.0799692   | no  |
| Asb1     | 8.45685  | 8.15024  | -0.053278  | 0.7231   | 0.831913    | no  |
| Asb13    | 17.3857  | 17.9344  | 0.0448271  | 0.77075  | 0.864428    | no  |
| Asb3     | 5.64432  | 5.68249  | 0.00972235 | 0.9567   | 0.976752    | no  |
| Asb6     | 36.0682  | 34.851   | -0.0495291 | 0.7373   | 0.841964    | no  |
| Asb7     | 3.83072  | 3.73176  | -0.0377578 | 0.831    | 0.903058    | no  |
| Asb8     | 12.6371  | 10.7298  | -0.236048  | 0.15565  | 0.275354    | no  |
| Ascc1    | 18.9166  | 18.5616  | -0.0273338 | 0.91245  | 0.952053    | no  |
| Ascc2    | 13.8803  | 14.5167  | 0.064673   | 0.6772   | 0.799648    | no  |
| Ascc3    | 10.0666  | 9.84741  | -0.0317595 | 0.82295  | 0.898044    | no  |
| Asf1a    | 9.08463  | 8.58056  | -0.082355  | 0.7142   | 0.825928    | no  |
| Asf1b    | 43.1146  | 21.199   | -1.02418   | 5.00E-05 | 0.000236281 | yes |
| Ash1l    | 8.46528  | 8.97917  | 0.085025   | 0.5526   | 0.700194    | no  |
| Ash2l    | 17.3791  | 18.4288  | 0.0846046  | 0.56595  | 0.71135     | no  |
| Asl      | 20.5737  | 21.7925  | 0.0830274  | 0.6048   | 0.743577    | no  |
| Asna1    | 55.2459  | 56.0582  | 0.0210578  | 0.8891   | 0.93788     | no  |
| Asns     | 3.58137  | 3.55616  | -0.0101893 | 0.9667   | 0.981919    | no  |
| Asnsd1   | 59.5657  | 53.9834  | -0.141966  | 0.37405  | 0.53269     | no  |
| Aspm     | 4.25747  | 2.44309  | -0.801285  | 5.00E-05 | 0.000236281 | yes |
| Aspscr1  | 49.9738  | 45.0874  | -0.148447  | 0.3122   | 0.465851    | no  |
| Asrg1    | 27.0066  | 24.1284  | -0.162584  | 0.2812   | 0.431012    | no  |
| Ass1     | 36.1793  | 46.7404  | 0.369503   | 0.013    | 0.0343645   | yes |
| Aste1    | 6.26086  | 6.3749   | 0.0260414  | 0.899    | 0.944076    | no  |
| Asun     | 24.9312  | 29.0489  | 0.220532   | 0.1301   | 0.239233    | no  |
| Asxl1    | 32.3453  | 31.5898  | -0.0341002 | 0.81165  | 0.89103     | no  |
| Asxl2    | 13.8372  | 14.9071  | 0.107449   | 0.4476   | 0.605012    | no  |
| Atad1    | 40.0034  | 41.0982  | 0.0389556  | 0.78925  | 0.876956    | no  |
| Atad2    | 18.9285  | 14.0505  | -0.429944  | 0.00235  | 0.00770045  | yes |
| Atad2b   | 12.9675  | 13.55    | 0.0633894  | 0.65565  | 0.783746    | no  |
| Atad3a   | 8.70552  | 9.82267  | 0.174184   | 0.3126   | 0.466281    | no  |
| Atad5    | 3.35909  | 2.3464   | -0.517619  | 0.0029   | 0.00927196  | yes |
| Atat1    | 3.18972  | 3.29298  | 0.0459646  | 0.85365  | 0.916957    | no  |
| Ate1     | 11.5245  | 11.6303  | 0.0131858  | 0.9331   | 0.963486    | no  |
| Atf1     | 40.4182  | 35.3721  | -0.192395  | 0.18885  | 0.321462    | no  |
| Atf2     | 16.5776  | 15.2148  | -0.123752  | 0.3996   | 0.558606    | no  |
| Atf4     | 233.487  | 231.313  | -0.0135014 | 0.9243   | 0.958705    | no  |
| Atf5     | 4.67926  | 4.24535  | -0.140396  | 0.81835  | 0.895169    | no  |
| Atf6     | 14.1925  | 15.4851  | 0.125749   | 0.3802   | 0.539197    | no  |
| Atf6b    | 30.8955  | 32.3953  | 0.0683868  | 0.63505  | 0.767782    | no  |
| Atf7     | 5.71427  | 5.07342  | -0.171612  | 0.33905  | 0.495411    | no  |
| Atf7ip   | 37.7244  | 36.875   | -0.0328556 | 0.81445  | 0.892604    | no  |
| Atg10    | 3.19036  | 3.89991  | 0.289724   | 0.24065  | 0.385698    | no  |
| Atg101   | 30.4492  | 27.3432  | -0.155222  | 0.335    | 0.490957    | no  |
| Atg12    | 32.0964  | 31.4388  | -0.0298673 | 0.8378   | 0.907041    | no  |
| Atg13    | 15.5729  | 14.6727  | -0.085906  | 0.569    | 0.713824    | no  |
| Atg14    | 3.99551  | 4.80868  | 0.267263   | 0.14035  | 0.253569    | no  |
| Atg16l1  | 20.3495  | 19.6629  | -0.0495189 | 0.74005  | 0.843712    | no  |
| Atg16l2  | 30.2529  | 31.5781  | 0.0618513  | 0.671    | 0.795147    | no  |
| Atg2a    | 18.0072  | 17.4386  | -0.0462891 | 0.74705  | 0.848622    | no  |
| Atg2b    | 7.29046  | 8.32909  | 0.19215    | 0.18085  | 0.310487    | no  |

|          |         |          |             |          |             |     |
|----------|---------|----------|-------------|----------|-------------|-----|
| Atg3     | 43.7603 | 41.7579  | -0.067574   | 0.6512   | 0.780304    | no  |
| Atg4a    | 13.678  | 12.5984  | -0.118621   | 0.4689   | 0.625537    | no  |
| Atg4b    | 17.933  | 17.5169  | -0.0338662  | 0.82335  | 0.898272    | no  |
| Atg4d    | 25.3452 | 18.3933  | -0.46253    | 0.05235  | 0.113017    | no  |
| Atg5     | 28.6331 | 27.8168  | -0.0417275  | 0.77515  | 0.867461    | no  |
| Atg7     | 16.1661 | 14.7829  | -0.129042   | 0.3886   | 0.547742    | no  |
| Atg9a    | 7.47239 | 9.13424  | 0.289716    | 0.0728   | 0.148431    | no  |
| Athl1    | 10.1051 | 10.6155  | 0.0710844   | 0.6543   | 0.782742    | no  |
| Atic     | 45.1946 | 45.4007  | 0.00656446  | 0.96215  | 0.979794    | no  |
| Atl2     | 8.74491 | 7.6491   | -0.193154   | 0.2331   | 0.377069    | no  |
| Atl3     | 22.1627 | 21.6646  | -0.032797   | 0.8173   | 0.894617    | no  |
| Atm      | 12.3778 | 13.4933  | 0.12449     | 0.3796   | 0.538584    | no  |
| Atmin    | 12.1642 | 11.7741  | -0.0470199  | 0.7511   | 0.851264    | no  |
| Atr1     | 4.16557 | 4.83824  | 0.215969    | 0.2147   | 0.354919    | no  |
| Atox1    | 254.516 | 243.113  | -0.0661255  | 0.6621   | 0.788625    | no  |
| Atp10a   | 16.0105 | 17.957   | 0.165525    | 0.2467   | 0.391884    | no  |
| Atp10d   | 22.4067 | 22.2502  | -0.0101132  | 0.9412   | 0.968182    | no  |
| Atp11a   | 7.89642 | 7.45435  | -0.0831144  | 0.57245  | 0.716763    | no  |
| Atp11b   | 94.5852 | 97.9389  | 0.0502666   | 0.72935  | 0.836091    | no  |
| Atp11c   | 8.42228 | 8.24849  | -0.0300795  | 0.83985  | 0.908243    | no  |
| Atp13a1  | 37.5221 | 40.6119  | 0.114165    | 0.4152   | 0.573957    | no  |
| Atp13a2  | 14.9994 | 14.5941  | -0.0395231  | 0.78845  | 0.876494    | no  |
| Atp13a3  | 25.1451 | 27.1099  | 0.10854     | 0.45125  | 0.608721    | no  |
| Atp1a1   | 235.867 | 369.011  | 0.645689    | 5.00E-05 | 0.000236281 | yes |
| Atp1b1   | 1.28704 | 0.808176 | -0.671311   | 0.18005  | 0.309385    | no  |
| Atp1b3   | 556.332 | 622.729  | 0.162658    | 0.2726   | 0.420846    | no  |
| Atp2a1   | 1.49665 | 0.882529 | -0.762019   | 0.26435  | 0.411095    | no  |
| Atp2a2   | 44.3796 | 46.2662  | 0.0600615   | 0.6684   | 0.793118    | no  |
| Atp2a3   | 210.563 | 169.738  | -0.310939   | 0.0373   | 0.0848166   | no  |
| Atp2b1   | 32.5513 | 36.7214  | 0.173905    | 0.217    | 0.357807    | no  |
| Atp2b4   | 42.7054 | 45.0039  | 0.075631    | 0.5964   | 0.736804    | no  |
| Atp2c1   | 20.666  | 18.9996  | -0.121289   | 0.4402   | 0.598194    | no  |
| Atp5a1   | 333.541 | 335.002  | 0.00630636  | 0.96775  | 0.982463    | no  |
| Atp5b    | 448.02  | 440.636  | -0.0239748  | 0.86955  | 0.926633    | no  |
| Atp5c1   | 282.053 | 269.657  | -0.064842   | 0.6483   | 0.778004    | no  |
| Atp5d    | 211.199 | 209.51   | -0.0115879  | 0.93075  | 0.962129    | no  |
| Atp5e    | 685.612 | 684.788  | -0.00173419 | 0.9903   | 0.994103    | no  |
| Atp5f1   | 184.19  | 170.265  | -0.113409   | 0.4595   | 0.616762    | no  |
| Atp5g1   | 84.5621 | 89.6908  | 0.0849493   | 0.5685   | 0.713387    | no  |
| Atp5g2   | 414.094 | 414.651  | 0.00193955  | 0.98895  | 0.993496    | no  |
| Atp5g3   | 395.904 | 380.554  | -0.0570495  | 0.68455  | 0.805134    | no  |
| Atp5h    | 832.358 | 671.823  | -0.309122   | 0.02975  | 0.0701013   | no  |
| Atp5j    | 223.508 | 195.241  | -0.195075   | 0.34105  | 0.497571    | no  |
| Atp5j2   | 317.643 | 302.696  | -0.0695363  | 0.62755  | 0.761741    | no  |
| Atp5k    | 766.652 | 711.871  | -0.106958   | 0.46235  | 0.619456    | no  |
| Atp5l    | 487.556 | 449.413  | -0.117523   | 0.4042   | 0.563151    | no  |
| Atp5o    | 221.039 | 209.865  | -0.0748395  | 0.6021   | 0.741507    | no  |
| Atp5s    | 1.45077 | 1.39645  | -0.0550588  | 0.87     | 0.926916    | no  |
| Atp5sl   | 35.2689 | 34.6602  | -0.0251135  | 0.86895  | 0.926301    | no  |
| Atp6ap1  | 68.166  | 67.0778  | -0.0232174  | 0.86685  | 0.924942    | no  |
| Atp6ap2  | 23.3402 | 23.8155  | 0.0290811   | 0.8495   | 0.914113    | no  |
| Atp6v0a2 | 39.3002 | 35.7408  | -0.136962   | 0.33465  | 0.490586    | no  |
| Atp6v0b  | 68.2741 | 63.6043  | -0.102213   | 0.4959   | 0.650539    | no  |
| Atp6v0c  | 70.7285 | 71.2284  | 0.0101621   | 0.95745  | 0.977108    | no  |
| Atp6v0d1 | 53.4569 | 55.4909  | 0.0538745   | 0.7053   | 0.819691    | no  |
| Atp6v0e  | 155.087 | 147.405  | -0.0732966  | 0.6157   | 0.752547    | no  |
| Atp6v1a  | 19.0914 | 17.9764  | -0.0868129  | 0.5517   | 0.699518    | no  |



|               |         |          |             |          |             |     |
|---------------|---------|----------|-------------|----------|-------------|-----|
| Atp6v1b2      | 33.8647 | 36.8244  | 0.12088     | 0.40015  | 0.559142    | no  |
| Atp6v1c1      | 38.0315 | 34.8356  | -0.126632   | 0.3852   | 0.544221    | no  |
| Atp6v1d       | 83.2499 | 78.9103  | -0.0772343  | 0.5922   | 0.7334      | no  |
| Atp6v1e1      | 68.4022 | 57.9638  | -0.238891   | 0.10365  | 0.199048    | no  |
| Atp6v1f       | 218.451 | 200.228  | -0.12567    | 0.38105  | 0.540011    | no  |
| Atp6v1g1      | 58.1614 | 60.3762  | 0.0539177   | 0.7215   | 0.830898    | no  |
| Atp6v1g2      | 1.66721 | 1.72317  | 0.0476315   | 0.8872   | 0.936799    | no  |
| Atp6v1h       | 39.2753 | 41.697   | 0.0863196   | 0.54865  | 0.696891    | no  |
| Atp7a         | 2.54979 | 2.74411  | 0.105961    | 0.53175  | 0.682412    | no  |
| Atp8a1        | 5.2275  | 6.15128  | 0.234766    | 0.11845  | 0.221886    | no  |
| Atp8b2        | 72.7152 | 78.2203  | 0.105287    | 0.4647   | 0.621755    | no  |
| Atp8b4        | 53.519  | 65.1826  | 0.284437    | 0.0475   | 0.104139    | no  |
| Atp9b         | 16.3169 | 17.2932  | 0.0838399   | 0.5594   | 0.705971    | no  |
| Atpaf1        | 7.02028 | 6.84706  | -0.0360443  | 0.8419   | 0.909652    | no  |
| Atpaf2        | 18.1159 | 17.8635  | -0.0202428  | 0.89885  | 0.944002    | no  |
| Atpif1        | 96.5389 | 90.8832  | -0.0870964  | 0.5832   | 0.72601     | no  |
| Atr           | 9.97705 | 10.8278  | 0.118057    | 0.4181   | 0.5767      | no  |
| Atraid        | 41.0346 | 41.0356  | 3.52E-05    | 0.9999   | 0.9999      | no  |
| Atrip         | 8.83031 | 8.94936  | 0.0193203   | 0.90945  | 0.950074    | no  |
| Atrn          | 5.6927  | 5.52369  | -0.0434812  | 0.7735   | 0.866246    | no  |
| Atrn1         | 1.16111 | 1.00601  | -0.206861   | 0.3378   | 0.494116    | no  |
| Atrx          | 33.2903 | 34.1012  | 0.0347208   | 0.80995  | 0.890105    | no  |
| Atxn1         | 14.1751 | 18.6115  | 0.392837    | 0.0056   | 0.0165249   | yes |
| Atxn10        | 30.089  | 29.0013  | -0.0531181  | 0.71705  | 0.827677    | no  |
| Atxn1l        | 7.73781 | 7.33467  | -0.0771935  | 0.607    | 0.745334    | no  |
| Atxn2         | 6.34406 | 6.72399  | 0.0839108   | 0.60495  | 0.743709    | no  |
| Atxn2l        | 108.881 | 113.909  | 0.065134    | 0.6504   | 0.779663    | no  |
| Atxn3         | 10.1176 | 9.34475  | -0.114641   | 0.6109   | 0.748378    | no  |
| Atxn7         | 15.7243 | 16.6447  | 0.0820683   | 0.56265  | 0.708578    | no  |
| Atxn7l1       | 26.2791 | 24.1697  | -0.355683   | 0.09235  | 0.181017    | no  |
| Atxn7l2       | 8.20819 | 7.56368  | -0.117977   | 0.50115  | 0.655356    | no  |
| Atxn7l3       | 45.1108 | 44.8384  | -0.00873931 | 0.95645  | 0.97668     | no  |
| Atxn7l3b      | 19.8942 | 27.3027  | 0.456693    | 0.0018   | 0.00607738  | yes |
| AU019823      | 15.4523 | 16.1892  | 0.0672145   | 0.6926   | 0.810886    | no  |
| AU022252      | 3.42206 | 3.17404  | -0.108545   | 0.6565   | 0.784258    | no  |
| AU040320      | 19.1627 | 18.5987  | -0.0430979  | 0.79315  | 0.879351    | no  |
| AU041133      | 1.3161  | 1.45909  | 0.148803    | 0.59055  | 0.732024    | no  |
| Auh           | 18.9125 | 18.3282  | -0.0452795  | 0.7853   | 0.874329    | no  |
| Aup1          | 143.855 | 136.625  | -0.074394   | 0.6      | 0.739763    | no  |
| Aurka         | 14.0957 | 8.13105  | -0.793743   | 5.00E-05 | 0.000236281 | yes |
| Aurkaip1      | 72.4937 | 69.9836  | -0.0508396  | 0.7275   | 0.834947    | no  |
| Aurkb         | 23.6387 | 12.637   | -0.903491   | 5.00E-05 | 0.000236281 | yes |
| Aven          | 34.7521 | 31.6573  | -0.134566   | 0.38265  | 0.541724    | no  |
| Avl9          | 13.3001 | 12.52    | -0.0872043  | 0.5385   | 0.688209    | no  |
| Avpi1         | 2.45353 | 2.90615  | 0.244249    | 0.4596   | 0.616861    | no  |
| Avpr2         | 1.34488 | 0.880475 | -0.611126   | 0.7476   | 0.848946    | no  |
| AW146154      | 2.26224 | 2.26013  | -0.00134907 | 0.99     | 0.993915    | no  |
| AW209491      | 2.95176 | 3.33707  | 0.177005    | 0.4405   | 0.598498    | no  |
| AW549877      | 23.469  | 24.9683  | 0.0893436   | 0.5281   | 0.679408    | no  |
| AW554918      | 1.99982 | 2.04871  | 0.0348479   | 0.855    | 0.917876    | no  |
| Axin1         | 41.5606 | 40.6599  | -0.0316072  | 0.8211   | 0.896953    | no  |
| Axin2         | 6.81902 | 10.4668  | 0.618178    | 0.00025  | 0.00103712  | yes |
| Axl           | 3.76831 | 5.50463  | 0.546729    | 0.001    | 0.00359708  | yes |
| AY074887      | 1.14274 | 1.14121  | -0.0019328  | 0.9061   | 0.948301    | no  |
| Azi2          | 47.9592 | 41.8771  | -0.195647   | 0.2394   | 0.384423    | no  |
| Azin1         | 33.7192 | 31.7986  | -0.0846104  | 0.5576   | 0.704468    | no  |
| B230219D22Rik | 22.8071 | 22.9905  | 0.0115586   | 0.93705  | 0.965841    | no  |

|               |          |         |            |          |             |     |
|---------------|----------|---------|------------|----------|-------------|-----|
| B2m           | 4296.16  | 3788.18 | -0.181541  | 0.2986   | 0.450617    | no  |
| B3galnt2      | 11.3392  | 11.2437 | -0.0121961 | 0.95455  | 0.9757      | no  |
| B3galt4       | 11.5558  | 12.015  | 0.0562123  | 0.75245  | 0.852029    | no  |
| B3galt6       | 1.94684  | 2.45539 | 0.334816   | 0.1341   | 0.245062    | no  |
| B3gat2        | 0.853163 | 1.00031 | 0.229557   | 0.8323   | 0.903775    | no  |
| B3gat3        | 65.4079  | 64.5345 | -0.0193944 | 0.8916   | 0.939323    | no  |
| B3glct        | 3.89854  | 2.97425 | -0.390407  | 0.031    | 0.0725382   | no  |
| B3gnt1        | 5.85205  | 6.13561 | 0.068266   | 0.7225   | 0.831616    | no  |
| B3gnt2        | 55.7517  | 51.0335 | -0.127571  | 0.36755  | 0.526034    | no  |
| B3gnt3        | 1.36797  | 1.66147 | 0.280421   | 0.3332   | 0.489009    | no  |
| B3gnt5        | 15.1204  | 14.9168 | -0.0195582 | 0.8949   | 0.941353    | no  |
| B3gnt9        | 3.89662  | 4.15303 | 0.0919413  | 0.7749   | 0.867278    | no  |
| B3gnt11       | 10.3639  | 9.65203 | -0.102668  | 0.72345  | 0.832153    | no  |
| B4galnt1      | 377.432  | 377.892 | 0.00175737 | 0.98935  | 0.99368     | no  |
| B4galnt4      | 0.680748 | 2.37015 | 1.79978    | 5.00E-05 | 0.000236281 | yes |
| B4galt1       | 62.8162  | 60.0066 | -0.066015  | 0.63025  | 0.76385     | no  |
| B4galt3       | 11.0641  | 10.125  | -0.127969  | 0.46375  | 0.620802    | no  |
| B4galt5       | 31.6241  | 27.3868 | -0.207545  | 0.14805  | 0.264354    | no  |
| B4galt7       | 47.5422  | 45.2787 | -0.0703789 | 0.6239   | 0.758877    | no  |
| B630005N14Rik | 3.38671  | 3.02556 | -0.162684  | 0.38335  | 0.542411    | no  |
| B9d2          | 16.1259  | 14.1452 | -0.189065  | 0.3221   | 0.477003    | no  |
| Babam1        | 49.1791  | 45.6734 | -0.106691  | 0.46785  | 0.624561    | no  |
| Bace1         | 2.5524   | 2.74055 | 0.10261    | 0.60045  | 0.740149    | no  |
| Bach1         | 7.03625  | 7.06343 | 0.00556186 | 0.9728   | 0.985025    | no  |
| Bach2         | 1.75012  | 2.269   | 0.374601   | 0.03635  | 0.0829933   | no  |
| Bad           | 20.7198  | 20.275  | -0.0313083 | 0.88495  | 0.935641    | no  |
| Bag1          | 106.172  | 99.8148 | -0.0890716 | 0.53725  | 0.687346    | no  |
| Bag2          | 2.32361  | 2.70099 | 0.217122   | 0.40305  | 0.561993    | no  |
| Bag3          | 4.71858  | 2.52086 | -0.904435  | 2.00E-04 | 0.0008488   | yes |
| Bag4          | 6.37503  | 6.54454 | 0.0378591  | 0.81505  | 0.892999    | no  |
| Bag5          | 12.902   | 12.75   | -0.0171042 | 0.91695  | 0.954462    | no  |
| Bag6          | 58.2007  | 57.7498 | -0.0112217 | 0.9362   | 0.96536     | no  |
| Bahd1         | 12.7779  | 13.1061 | 0.0365959  | 0.80755  | 0.888491    | no  |
| Baiap2        | 15.6436  | 12.8432 | -0.284562  | 0.0814   | 0.162971    | no  |
| Baiap3        | 94.6156  | 82.874  | -0.191159  | 0.19865  | 0.334449    | no  |
| Bak1          | 59.4119  | 50.3793 | -0.237919  | 0.10045  | 0.194006    | no  |
| Banf1         | 143.952  | 128.705 | -0.161525  | 0.42005  | 0.578531    | no  |
| Banp          | 6.43682  | 6.22929 | -0.0472798 | 0.76595  | 0.861125    | no  |
| Bap1          | 28.5931  | 27.7185 | -0.0448208 | 0.7553   | 0.853939    | no  |
| Bard1         | 3.66018  | 2.34046 | -0.645124  | 0.00075  | 0.00278555  | yes |
| Batf          | 63.479   | 73.3357 | 0.208236   | 0.17275  | 0.299289    | no  |
| Bax           | 121.524  | 138.845 | 0.192234   | 0.1789   | 0.307791    | no  |
| Baz1a         | 36.2357  | 36.8797 | 0.0254151  | 0.85885  | 0.920092    | no  |
| Baz1b         | 42.9264  | 39.2847 | -0.127897  | 0.36285  | 0.521093    | no  |
| Baz2a         | 34.0149  | 33.05   | -0.0415154 | 0.76985  | 0.863803    | no  |
| Baz2b         | 4.29141  | 6.80522 | 0.665189   | 5.00E-05 | 0.000236281 | yes |
| Bbc3          | 9.33764  | 9.35834 | 0.00319406 | 0.9828   | 0.990094    | no  |
| Bbip1         | 23.797   | 20.9983 | -0.180505  | 0.67275  | 0.796325    | no  |
| Bbs12         | 2.03386  | 2.06679 | 0.0231699  | 0.92565  | 0.959443    | no  |
| Bbs2          | 2.1605   | 3.20276 | 0.56795    | 0.00995  | 0.0273191   | yes |
| Bbs4          | 4.58764  | 5.8628  | 0.353838   | 0.06275  | 0.131616    | no  |
| Bbs9          | 5.08735  | 6.42658 | 0.337139   | 0.05195  | 0.11227     | no  |
| Bbx           | 4.26985  | 4.85348 | 0.184833   | 0.22835  | 0.371429    | no  |
| BC003331      | 13.0397  | 11.8173 | -0.14201   | 0.77995  | 0.870597    | no  |
| BC003965      | 8.97992  | 9.04462 | 0.0103585  | 0.9501   | 0.973139    | no  |
| BC004004      | 21.6977  | 21.8599 | 0.0107498  | 0.9423   | 0.968678    | no  |
| BC005537      | 121.304  | 126.13  | 0.0562916  | 0.69615  | 0.81341     | no  |

|          |         |         |             |          |             |     |
|----------|---------|---------|-------------|----------|-------------|-----|
| BC005561 | 1.34346 | 1.80331 | 0.42469     | 0.0497   | 0.108233    | no  |
| BC005624 | 50.9083 | 45.4825 | -0.162591   | 0.2776   | 0.426847    | no  |
| BC005764 | 6.41026 | 6.95337 | 0.11733     | 0.8654   | 0.92408     | no  |
| BC017158 | 8.09003 | 9.11616 | 0.172282    | 0.3127   | 0.4664      | no  |
| BC017643 | 44.2649 | 36.3829 | -0.282902   | 0.0551   | 0.11809     | no  |
| BC018507 | 18.5261 | 19.0361 | 0.0391755   | 0.7799   | 0.870555    | no  |
| BC021614 | 73.0555 | 93.1694 | 0.350863    | 0.0219   | 0.0539961   | no  |
| BC023829 | 9.07429 | 10.7843 | 0.249078    | 0.16105  | 0.283091    | no  |
| BC024978 | 2.9214  | 2.89936 | -0.0109282  | 0.98285  | 0.990102    | no  |
| BC027231 | 9.68458 | 9.78632 | 0.0150777   | 0.927    | 0.960222    | no  |
| BC029214 | 30.6545 | 30.5065 | -0.00698522 | 0.9655   | 0.981181    | no  |
| BC030336 | 5.49817 | 4.90151 | -0.165726   | 0.3147   | 0.468532    | no  |
| BC030867 | 3.2415  | 1.76401 | -0.877805   | 0.00055  | 0.0021091   | yes |
| BC031181 | 85.1369 | 88.2407 | 0.0516599   | 0.72     | 0.829861    | no  |
| BC035044 | 2.97745 | 2.2579  | -0.399097   | 0.57175  | 0.716179    | no  |
| BC037034 | 39.3526 | 42.8044 | 0.121301    | 0.4071   | 0.565918    | no  |
| BC048403 | 2.4265  | 3.44783 | 0.50681     | 0.01855  | 0.0466972   | yes |
| BC052040 | 5.81681 | 4.05298 | -0.521245   | 0.0064   | 0.018565    | yes |
| BC053749 | 2.56214 | 2.68821 | 0.0692967   | 0.76545  | 0.860823    | no  |
| BC055324 | 3.0146  | 2.20222 | -0.453007   | 0.3366   | 0.49279     | no  |
| BC068281 | 2.54132 | 2.90798 | 0.194439    | 0.39635  | 0.555372    | no  |
| BC094916 | 35.0519 | 31.3225 | -0.162291   | 0.29775  | 0.44968     | no  |
| Bcap29   | 23.8152 | 26.0831 | 0.131234    | 0.3922   | 0.55133     | no  |
| Bcap31   | 142.742 | 134.548 | -0.0852869  | 0.5443   | 0.693136    | no  |
| Bcas2    | 72.1724 | 66.8253 | -0.111052   | 0.439    | 0.597058    | no  |
| Bcas3    | 13.5747 | 14.5529 | 0.100391    | 0.5147   | 0.667571    | no  |
| Bcat2    | 22.167  | 20.8026 | -0.0916514  | 0.55475  | 0.701998    | no  |
| Bccip    | 49.9158 | 51.5715 | 0.0470776   | 0.7887   | 0.876703    | no  |
| Bcdin3d  | 6.74372 | 6.42951 | -0.0688361  | 0.75895  | 0.856543    | no  |
| Bckdha   | 23.667  | 23.2206 | -0.0274737  | 0.86095  | 0.921489    | no  |
| Bckdhb   | 5.62471 | 5.39096 | -0.0612352  | 0.78485  | 0.874089    | no  |
| Bckdk    | 11.7334 | 12.3332 | 0.0719352   | 0.65575  | 0.783786    | no  |
| Bcl10    | 43.6007 | 42.0951 | -0.0506982  | 0.7246   | 0.832932    | no  |
| Bcl11b   | 42.7961 | 40.9897 | -0.0622187  | 0.6615   | 0.788123    | no  |
| Bcl2     | 4.70118 | 8.12677 | 0.789661    | 5.00E-05 | 0.000236281 | yes |
| Bcl2a1b  | 79.6681 | 69.6605 | -0.193662   | 0.2092   | 0.347962    | no  |
| Bcl2a1d  | 29.6883 | 27.5712 | -0.106734   | 0.5442   | 0.693084    | no  |
| Bcl2l1   | 16.1801 | 14.5817 | -0.150054   | 0.3358   | 0.491813    | no  |
| Bcl2l11  | 16.114  | 14.7045 | -0.132062   | 0.40305  | 0.561993    | no  |
| Bcl2l12  | 16.2821 | 15.7165 | -0.0510022  | 0.79975  | 0.883518    | no  |
| Bcl2l13  | 12.5701 | 10.6995 | -0.23245    | 0.1081   | 0.206075    | no  |
| Bcl2l2   | 1.82636 | 2.16377 | 0.244569    | 0.28125  | 0.431051    | no  |
| Bcl3     | 11.3712 | 10.7189 | -0.0852311  | 0.6258   | 0.760415    | no  |
| Bcl6     | 3.08883 | 3.03979 | -0.0230917  | 0.9084   | 0.949549    | no  |
| Bcl7a    | 4.55696 | 4.82931 | 0.0837461   | 0.63855  | 0.770548    | no  |
| Bcl7b    | 35.6531 | 34.6853 | -0.0397032  | 0.7958   | 0.881085    | no  |
| Bcl7c    | 15.4581 | 15.0281 | -0.0406993  | 0.8342   | 0.904975    | no  |
| Bcl9l    | 36.8078 | 39.9835 | 0.119395    | 0.39635  | 0.555372    | no  |
| Bclaf1   | 34.6463 | 35.3767 | 0.0300966   | 0.83135  | 0.903216    | no  |
| Bcor     | 16.2923 | 18.4448 | 0.179027    | 0.2223   | 0.364054    | no  |
| Bcorl1   | 1.7833  | 1.66007 | -0.103308   | 0.5942   | 0.735129    | no  |
| Bcr      | 4.99152 | 6.44421 | 0.368524    | 0.01825  | 0.0460274   | yes |
| Bcs1l    | 6.39002 | 6.43247 | 0.00955336  | 0.96115  | 0.9791      | no  |
| Bdh1     | 13.2249 | 13.9404 | 0.0760086   | 0.61895  | 0.755068    | no  |
| Bdp1     | 9.32332 | 10.6055 | 0.185896    | 0.1986   | 0.334373    | no  |
| Becn1    | 109.305 | 103.887 | -0.0733384  | 0.60095  | 0.740559    | no  |
| Bend3    | 1.13113 | 1.40279 | 0.310537    | 0.15315  | 0.271776    | no  |

|         |          |          |            |          |             |     |
|---------|----------|----------|------------|----------|-------------|-----|
| Bend4   | 1.43225  | 1.33895  | -0.0971795 | 0.6159   | 0.752739    | no  |
| Bend5   | 0.923188 | 1.32712  | 0.523597   | 0.13045  | 0.239752    | no  |
| Bet1    | 11.0996  | 12.0813  | 0.122267   | 0.4963   | 0.650834    | no  |
| Bet1l   | 20.2758  | 20.9368  | 0.0462817  | 0.7779   | 0.869229    | no  |
| Bfar    | 23.6931  | 23.8311  | 0.00837923 | 0.95555  | 0.976242    | no  |
| Bhlhb9  | 5.32096  | 6.3704   | 0.259699   | 0.1511   | 0.268821    | no  |
| Bhlhe40 | 131.897  | 102.499  | -0.363798  | 0.01105  | 0.0299157   | yes |
| Bicd2   | 19.5602  | 20.3777  | 0.0590748  | 0.68045  | 0.80209     | no  |
| Bid     | 17.2008  | 20.4523  | 0.249783   | 0.1184   | 0.221822    | no  |
| Bik     | 1.48065  | 1.22881  | -0.268971  | 0.54575  | 0.694256    | no  |
| Bin1    | 92.5945  | 85.372   | -0.117164  | 0.4052   | 0.564188    | no  |
| Bin2    | 459.71   | 427.326  | -0.105384  | 0.47045  | 0.627048    | no  |
| Bin3    | 41.8266  | 35.8908  | -0.220807  | 0.3539   | 0.511497    | no  |
| Birc2   | 31.9088  | 34.2164  | 0.100733   | 0.47795  | 0.634039    | no  |
| Birc3   | 19.4112  | 18.1763  | -0.094828  | 0.5283   | 0.679554    | no  |
| Birc5   | 96.4331  | 56.3144  | -0.776024  | 5.00E-05 | 0.000236281 | yes |
| Birc6   | 40.3841  | 44.5862  | 0.142809   | 0.325    | 0.48018     | no  |
| Bivm    | 3.29503  | 3.90168  | 0.243805   | 0.19555  | 0.330262    | no  |
| Blcap   | 5.02369  | 5.09221  | 0.0195463  | 0.92165  | 0.957392    | no  |
| Blm     | 3.20153  | 2.58251  | -0.309988  | 0.09915  | 0.191979    | no  |
| Blmh    | 41.4148  | 38.5394  | -0.103813  | 0.4606   | 0.617792    | no  |
| Bloc1s1 | 126.299  | 122.514  | -0.043899  | 0.77725  | 0.868861    | no  |
| Bloc1s2 | 56.8309  | 56.3205  | -0.0130146 | 0.9326   | 0.963238    | no  |
| Bloc1s3 | 11.7294  | 10.4321  | -0.169103  | 0.33735  | 0.493581    | no  |
| Bloc1s4 | 21.665   | 22.2632  | 0.039294   | 0.81285  | 0.891792    | no  |
| Bloc1s5 | 5.60523  | 5.6473   | 0.0107882  | 0.95435  | 0.975581    | no  |
| Bloc1s6 | 12.882   | 12.0321  | -0.0984733 | 0.5208   | 0.672862    | no  |
| Blvra   | 30.1087  | 29.4324  | -0.032774  | 0.83645  | 0.906302    | no  |
| Blvrb   | 1.86033  | 2.24274  | 0.269704   | 0.47975  | 0.635555    | no  |
| Blzf1   | 5.74179  | 6.41123  | 0.1591     | 0.34455  | 0.501413    | no  |
| Bmf     | 2.38729  | 2.05393  | -0.216986  | 0.277    | 0.426082    | no  |
| Bmi1    | 9.90069  | 11.2649  | 0.186235   | 0.2338   | 0.377803    | no  |
| Bmp2k   | 4.46749  | 5.53182  | 0.308289   | 0.0532   | 0.114547    | no  |
| Bms1    | 27.7303  | 27.8839  | 0.00796974 | 0.956    | 0.976447    | no  |
| Bmyc    | 2.93989  | 3.32295  | 0.176704   | 0.6003   | 0.740042    | no  |
| Bnip1   | 17.1429  | 18.5814  | 0.116249   | 0.51765  | 0.670154    | no  |
| Bnip2   | 25.1652  | 21.1556  | -0.250393  | 0.0797   | 0.160071    | no  |
| Bnip3l  | 63.5037  | 60.5838  | -0.0679086 | 0.6368   | 0.769054    | no  |
| Bod1    | 7.8136   | 7.73386  | -0.0147983 | 0.93825  | 0.96664     | no  |
| Bod1l   | 12.2865  | 13.8234  | 0.170041   | 0.2329   | 0.376806    | no  |
| Bola1   | 9.10937  | 14.2776  | 0.64833    | 0.0062   | 0.0180576   | yes |
| Bola2   | 263.979  | 279.735  | 0.0836378  | 0.59625  | 0.736683    | no  |
| Bola3   | 61.5354  | 69.1282  | 0.167857   | 0.32645  | 0.481778    | no  |
| Bop1    | 34.7534  | 34.8835  | 0.00538988 | 0.97805  | 0.98772     | no  |
| Bora    | 8.28274  | 7.44731  | -0.153388  | 0.38365  | 0.542705    | no  |
| Bpgm    | 12.4031  | 11.5415  | -0.103869  | 0.53065  | 0.681521    | no  |
| Bphl    | 1.96067  | 3.11788  | 0.669218   | 0.03225  | 0.0749809   | no  |
| Bpnt1   | 7.56573  | 9.31216  | 0.299636   | 0.0912   | 0.179166    | no  |
| Bptf    | 22.5908  | 25.0502  | 0.149089   | 0.2965   | 0.448214    | no  |
| Braf    | 4.69666  | 4.74799  | 0.0156821  | 0.91815  | 0.95519     | no  |
| Brap    | 32.2248  | 32.3469  | 0.00545656 | 0.97115  | 0.984202    | no  |
| Brat1   | 11.4958  | 11.3558  | -0.0176713 | 0.90765  | 0.949177    | no  |
| Brca1   | 3.83822  | 2.55698  | -0.586     | 0.00115  | 0.00407292  | yes |
| Brca2   | 1.21483  | 0.860764 | -0.497061  | 0.01155  | 0.0310715   | yes |
| Brcc3   | 30.4806  | 28.9911  | -0.072282  | 0.7023   | 0.817402    | no  |
| Brd1    | 32.3812  | 34.5724  | 0.0944655  | 0.5036   | 0.657707    | no  |
| Brd2    | 94.2619  | 105.696  | 0.165176   | 0.2415   | 0.386065    | no  |

|               |          |         |             |          |             |     |
|---------------|----------|---------|-------------|----------|-------------|-----|
| Brd3          | 10.5216  | 9.05687 | -0.21627    | 0.15125  | 0.26902     | no  |
| Brd4          | 51.3495  | 50.786  | -0.0159193  | 0.915    | 0.953431    | no  |
| Brd7          | 42.7651  | 39.8543 | -0.101699   | 0.47955  | 0.635361    | no  |
| Brd8          | 21.2731  | 20.9017 | -0.0254123  | 0.898    | 0.943447    | no  |
| Brd9          | 62.1079  | 54.2049 | -0.196354   | 0.1704   | 0.296075    | no  |
| Bre           | 35.8142  | 34.2485 | -0.0644933  | 0.67655  | 0.799174    | no  |
| Brf1          | 37.1088  | 41.5687 | 0.163736    | 0.3126   | 0.466281    | no  |
| Brf2          | 7.70787  | 7.58353 | -0.0234632  | 0.90765  | 0.949177    | no  |
| Bri3          | 20.1208  | 21.4184 | 0.0901648   | 0.6184   | 0.754697    | no  |
| Bri3bp        | 2.46619  | 3.14551 | 0.35101     | 0.0437   | 0.0970589   | no  |
| Bricd5        | 7.46553  | 7.22154 | -0.0479376  | 0.9129   | 0.952325    | no  |
| Brip1         | 2.41134  | 1.392   | -0.792675   | 5.00E-05 | 0.000236281 | yes |
| Brix1         | 16.0125  | 16.0617 | 0.00442743  | 0.9757   | 0.986631    | no  |
| Brk1          | 148.765  | 142.097 | -0.0661589  | 0.63995  | 0.771446    | no  |
| Brms1         | 52.1227  | 49.6949 | -0.0688135  | 0.64875  | 0.778346    | no  |
| Brms1l        | 5.08134  | 4.41052 | -0.204259   | 0.28495  | 0.435276    | no  |
| Brpf1         | 22.0465  | 20.8829 | -0.0782263  | 0.5903   | 0.731817    | no  |
| Brpf3         | 11.0447  | 9.56428 | -0.207626   | 0.16315  | 0.286098    | no  |
| Brwd1         | 15.3424  | 16.5582 | 0.110031    | 0.52605  | 0.67745     | no  |
| Brwd3         | 4.44798  | 4.77138 | 0.101254    | 0.52865  | 0.67983     | no  |
| Bscl2         | 116.021  | 100.03  | -0.213946   | 0.13755  | 0.24977     | no  |
| Bsdc1         | 27.0217  | 26.1452 | -0.0475711  | 0.7469   | 0.848547    | no  |
| Bsg           | 160.389  | 159.913 | -0.00428298 | 0.977    | 0.987224    | no  |
| Bspry         | 17.7965  | 17.3471 | -0.0368991  | 0.82495  | 0.899308    | no  |
| Bst2          | 62.711   | 70.3578 | 0.165992    | 0.27725  | 0.42642     | no  |
| Btaf1         | 10.5934  | 11.414  | 0.107635    | 0.45315  | 0.610677    | no  |
| Btbd1         | 32.8103  | 31.8264 | -0.0439234  | 0.7577   | 0.855556    | no  |
| Btbd10        | 17.5245  | 14.52   | -0.27133    | 0.0821   | 0.164121    | no  |
| Btbd11        | 5.955    | 6.12955 | 0.0416801   | 0.7938   | 0.879754    | no  |
| Btbd2         | 10.23    | 11.2014 | 0.130883    | 0.40965  | 0.568634    | no  |
| Btbd6         | 13.1365  | 15.7593 | 0.262625    | 0.40555  | 0.564553    | no  |
| Btbd7         | 10.4024  | 9.81855 | -0.0833394  | 0.5881   | 0.730077    | no  |
| Btbd9         | 4.33951  | 4.42895 | 0.0294302   | 0.85515  | 0.917912    | no  |
| Btd           | 9.57669  | 8.82778 | -0.117477   | 0.5182   | 0.670607    | no  |
| Btf3          | 826.517  | 752.571 | -0.135217   | 0.34305  | 0.499828    | no  |
| Btf3l4        | 8.20146  | 7.76728 | -0.0784714  | 0.63595  | 0.76837     | no  |
| Btg1          | 212.769  | 212.886 | 0.000795216 | 0.99625  | 0.997296    | no  |
| Btg2          | 68.4949  | 74.3014 | 0.117393    | 0.40415  | 0.563115    | no  |
| Btla          | 11.116   | 15.814  | 0.508558    | 0.00115  | 0.00407292  | yes |
| Btrc          | 2.7721   | 2.94156 | 0.0856012   | 0.63135  | 0.764867    | no  |
| Bub1          | 9.33884  | 4.60749 | -1.01926    | 5.00E-05 | 0.000236281 | yes |
| Bub1b         | 17.1577  | 9.44836 | -0.86072    | 5.00E-05 | 0.000236281 | yes |
| Bub3          | 60.5106  | 53.6927 | -0.172462   | 0.22995  | 0.3733      | no  |
| Bud13         | 12.436   | 11.1579 | -0.156452   | 0.3481   | 0.505298    | no  |
| Bud31         | 77.7677  | 66.9004 | -0.217156   | 0.33565  | 0.491664    | no  |
| Bysl          | 24.1538  | 20.5801 | -0.230999   | 0.436    | 0.594076    | no  |
| Bzrap1        | 4.55251  | 3.09932 | -0.55471    | 0.00125  | 0.00438681  | yes |
| Bzw1          | 149.353  | 139.424 | -0.0992453  | 0.48695  | 0.642152    | no  |
| Bzw2          | 35.4114  | 35.3833 | -0.00114528 | 0.9942   | 0.996289    | no  |
| C030006K11Rik | 5.99895  | 6.82858 | 0.186876    | 0.35715  | 0.514961    | no  |
| C030046E11Rik | 11.6394  | 11.6817 | 0.00523209  | 0.9721   | 0.984684    | no  |
| C1d           | 14.6836  | 13.0873 | -0.166041   | 0.2845   | 0.434739    | no  |
| C1galt1       | 24.4798  | 25.7843 | 0.0748987   | 0.62015  | 0.755957    | no  |
| C1galt1c1     | 8.36445  | 8.59222 | 0.0387597   | 0.8365   | 0.906314    | no  |
| C1qbp         | 48.6842  | 52.5505 | 0.110252    | 0.5047   | 0.658765    | no  |
| C1qtnf4       | 0.698395 | 1.19548 | 0.77547     | 0.0782   | 0.157588    | no  |
| C1qtnf6       | 4.16264  | 3.00365 | -0.470781   | 0.02825  | 0.067118    | no  |

|               |         |         |            |          |             |     |
|---------------|---------|---------|------------|----------|-------------|-----|
| C230052I12Rik | 8.74683 | 8.91741 | 0.0278648  | 0.8816   | 0.933694    | no  |
| C2cd2         | 2.04054 | 2.31654 | 0.183021   | 0.3194   | 0.47397     | no  |
| C2cd2l        | 8.01102 | 8.54887 | 0.0937466  | 0.5489   | 0.697083    | no  |
| C2cd3         | 18.9364 | 17.903  | -0.0809619 | 0.56855  | 0.713424    | no  |
| C2cd5         | 17.4204 | 18.1262 | 0.0572976  | 0.68775  | 0.807351    | no  |
| C330006A16Rik | 8.54977 | 9.78259 | 0.194331   | 0.2508   | 0.396461    | no  |
| C330007P06Rik | 14.1652 | 13.7997 | -0.0377188 | 0.8054   | 0.887094    | no  |
| C330018D20Rik | 4.55642 | 5.28381 | 0.213676   | 0.27175  | 0.419846    | no  |
| C330027C09Rik | 12.5589 | 8.18917 | -0.616919  | 5.00E-05 | 0.000236281 | yes |
| C78339        | 3.94072 | 3.30856 | -0.252257  | 0.3303   | 0.485976    | no  |
| C87436        | 7.81459 | 7.60013 | -0.0401471 | 0.8109   | 0.890677    | no  |
| C8g           | 2.95043 | 2.46951 | -0.256702  | 0.7758   | 0.867913    | no  |
| C920025E04Rik | 25.604  | 25.3944 | -0.0118571 | 0.9422   | 0.968641    | no  |
| Caap1         | 9.5496  | 10.1628 | 0.0897904  | 0.60935  | 0.747128    | no  |
| Cab39         | 95.3496 | 86.3716 | -0.14267   | 0.31275  | 0.466426    | no  |
| Cab39l        | 20.3802 | 19.1452 | -0.0901822 | 0.5484   | 0.696673    | no  |
| Cabin1        | 28.4079 | 32.5222 | 0.195132   | 0.1677   | 0.292509    | no  |
| Cables2       | 14.0595 | 16.1218 | 0.197463   | 0.19955  | 0.335548    | no  |
| Cacfd1        | 15.4219 | 14.8168 | -0.0577523 | 0.73485  | 0.840145    | no  |
| Cacna2d4      | 1.5563  | 1.17261 | -0.408395  | 0.0557   | 0.119202    | no  |
| Cacnb1        | 3.07302 | 5.58706 | 0.86243    | 1.00E-04 | 0.000450026 | yes |
| Cacnb3        | 1.47864 | 2.4762  | 0.743856   | 0.0043   | 0.013125    | yes |
| Cactin        | 26.8548 | 26.4448 | -0.0221984 | 0.8796   | 0.932569    | no  |
| Cacul1        | 14.343  | 14.4113 | 0.00685391 | 0.9634   | 0.980274    | no  |
| Cacybp        | 39.68   | 37.947  | -0.0644262 | 0.66205  | 0.788579    | no  |
| Cad           | 12.0985 | 13.6884 | 0.178128   | 0.71725  | 0.827787    | no  |
| Calcoco1      | 19.8212 | 20.2372 | 0.0299675  | 0.8442   | 0.91116     | no  |
| Calcrl        | 3.11375 | 3.07418 | -0.0184479 | 0.91655  | 0.954243    | no  |
| Calhm2        | 8.75914 | 7.29034 | -0.264803  | 0.15155  | 0.269445    | no  |
| Calm1         | 235.363 | 204.833 | -0.200439  | 0.17495  | 0.302233    | no  |
| Calm2         | 315.271 | 265.833 | -0.246075  | 0.0826   | 0.164994    | no  |
| Calm3         | 151.068 | 143.843 | -0.070707  | 0.61085  | 0.748343    | no  |
| Calr          | 313.546 | 334.577 | 0.0936636  | 0.5176   | 0.670113    | no  |
| Calu          | 40.6906 | 35.3938 | -0.2012    | 0.1561   | 0.275998    | no  |
| Camk1d        | 13.0641 | 15.767  | 0.271296   | 0.0621   | 0.130455    | no  |
| Camk2b        | 2.56357 | 2.40189 | -0.0939837 | 0.6442   | 0.774849    | no  |
| Camk2d        | 11.8657 | 14.1986 | 0.258954   | 0.0843   | 0.167877    | no  |
| Camk2g        | 40.3011 | 41.84   | 0.0540625  | 0.7071   | 0.821075    | no  |
| Camk2n1       | 1.57373 | 1.35034 | -0.220866  | 0.36345  | 0.521679    | no  |
| Camk4         | 11.8297 | 14.405  | 0.284164   | 0.04575  | 0.100913    | no  |
| Camkk2        | 4.32715 | 4.17097 | -0.0530331 | 0.7615   | 0.858131    | no  |
| Camkmt        | 1.30746 | 1.77051 | 0.4374     | 0.20165  | 0.338193    | no  |
| Caml          | 17.5226 | 17.5481 | 0.00209486 | 0.9875   | 0.992732    | no  |
| Camsap1       | 3.72636 | 4.27322 | 0.197556   | 0.21235  | 0.35204     | no  |
| Camsap2       | 3.77008 | 3.82776 | 0.0219082  | 0.88935  | 0.937989    | no  |
| Camta1        | 3.12925 | 2.83572 | -0.142105  | 0.5314   | 0.682199    | no  |
| Camta2        | 22.2331 | 23.61   | 0.0866851  | 0.5477   | 0.695997    | no  |
| Cand1         | 13.2487 | 13.7041 | 0.0487489  | 0.7324   | 0.838471    | no  |
| Cant1         | 33.0271 | 33.5134 | 0.0210853  | 0.8854   | 0.935946    | no  |
| Canx          | 62.9648 | 68.3402 | 0.118189   | 0.4046   | 0.563508    | no  |
| Cap1          | 508.365 | 442.235 | -0.201054  | 0.18095  | 0.310651    | no  |
| Capg          | 30.0801 | 26.9433 | -0.158884  | 0.32365  | 0.478736    | no  |
| Capn1         | 103.376 | 107.541 | 0.05699    | 0.69495  | 0.812483    | no  |
| Capn10        | 5.51458 | 5.41149 | -0.0272272 | 0.88025  | 0.932877    | no  |
| Capn11        | 11.0808 | 3.51731 | -1.65552   | 5.00E-05 | 0.000236281 | yes |
| Capn15        | 8.72561 | 9.47551 | 0.118948   | 0.46215  | 0.619259    | no  |
| Capn2         | 116.782 | 90.8128 | -0.362847  | 0.012    | 0.0320694   | yes |

|          |          |         |            |          |             |     |
|----------|----------|---------|------------|----------|-------------|-----|
| Capn7    | 30.8619  | 32.5598 | 0.0772611  | 0.59055  | 0.732024    | no  |
| Capns1   | 230.497  | 219.222 | -0.072353  | 0.61155  | 0.748901    | no  |
| Caprin1  | 68.437   | 65.3852 | -0.065812  | 0.65705  | 0.784623    | no  |
| Caprin2  | 2.49567  | 2.18166 | -0.193997  | 0.36225  | 0.520464    | no  |
| Capza1   | 250.663  | 222.422 | -0.172451  | 0.2384   | 0.383262    | no  |
| Capza2   | 120.543  | 111.565 | -0.111668  | 0.42935  | 0.587636    | no  |
| Capzb    | 455.348  | 390.966 | -0.219926  | 0.12765  | 0.235562    | no  |
| Car15    | 3.57704  | 2.2323  | -0.680238  | 0.02945  | 0.0695104   | no  |
| Car2     | 2.24148  | 1.5963  | -0.489717  | 0.0872   | 0.172624    | no  |
| Car5b    | 11.737   | 8.97981 | -0.386308  | 0.0153   | 0.0395135   | yes |
| Card11   | 66.3718  | 59.7429 | -0.151803  | 0.2826   | 0.432556    | no  |
| Card6    | 21.8327  | 23.1498 | 0.0845122  | 0.5517   | 0.699518    | no  |
| Carhsp1  | 24.7977  | 26.2121 | 0.0800267  | 0.58325  | 0.72601     | no  |
| Carkd    | 18.1133  | 17.8626 | -0.0201085 | 0.9065   | 0.948565    | no  |
| Carm1    | 8.15563  | 8.95348 | 0.134653   | 0.63995  | 0.771446    | no  |
| Carns1   | 6.15071  | 5.84109 | -0.0745158 | 0.6563   | 0.784112    | no  |
| Cars     | 9.47134  | 9.54432 | 0.0110744  | 0.94765  | 0.971828    | no  |
| Cars2    | 20.6966  | 20.0755 | -0.0439585 | 0.77955  | 0.870357    | no  |
| Casc3    | 34.5578  | 35.697  | 0.0467911  | 0.81535  | 0.893175    | no  |
| Casc4    | 6.42445  | 9.28727 | 0.531681   | 0.001    | 0.00359708  | yes |
| Casc5    | 4.32793  | 2.46062 | -0.814655  | 5.00E-05 | 0.000236281 | yes |
| Casd1    | 8.96678  | 10.0016 | 0.157573   | 0.3217   | 0.476591    | no  |
| Caskin2  | 1.96919  | 2.20675 | 0.164319   | 0.4106   | 0.569505    | no  |
| Casp1    | 61.3719  | 54.1452 | -0.180745  | 0.21445  | 0.354638    | no  |
| Casp2    | 21.6555  | 19.8407 | -0.126268  | 0.386    | 0.545024    | no  |
| Casp3    | 31.5361  | 30.2212 | -0.0614442 | 0.67695  | 0.799459    | no  |
| Casp4    | 18.3058  | 18.9245 | 0.0479584  | 0.77345  | 0.866232    | no  |
| Casp6    | 19.716   | 19.3807 | -0.0247457 | 0.8782   | 0.931855    | no  |
| Casp7    | 19.2438  | 16.3026 | -0.23929   | 0.12345  | 0.229274    | no  |
| Casp8    | 59.2397  | 54.753  | -0.113627  | 0.426    | 0.584399    | no  |
| Casp8ap2 | 12.9027  | 11.8531 | -0.122413  | 0.39985  | 0.558878    | no  |
| Casp9    | 7.99231  | 7.1733  | -0.155974  | 0.33465  | 0.490586    | no  |
| Cast     | 89.2939  | 84.3456 | -0.0822493 | 0.5644   | 0.710085    | no  |
| Cat      | 59.9608  | 55.6454 | -0.107757  | 0.45065  | 0.608075    | no  |
| Cbfa2t2  | 4.45843  | 4.28367 | -0.0576871 | 0.72825  | 0.835319    | no  |
| Cbfa2t3  | 0.313353 | 1.19927 | 1.93629    | 5.00E-05 | 0.000236281 | yes |
| Cbfb     | 85.1344  | 74.826  | -0.186203  | 0.19265  | 0.326364    | no  |
| Cbl      | 24.0553  | 34.5302 | 0.521501   | 0.00015  | 0.000653255 | yes |
| Cblb     | 24.6606  | 26.2239 | 0.0886764  | 0.5315   | 0.682265    | no  |
| Cbl1     | 8.42996  | 8.33446 | -0.0164366 | 0.9181   | 0.95519     | no  |
| Cbr1     | 27.7416  | 29.0701 | 0.0674844  | 0.6895   | 0.808665    | no  |
| Cbr4     | 6.66633  | 7.61103 | 0.191199   | 0.4051   | 0.564082    | no  |
| Cbwd1    | 5.04122  | 5.51673 | 0.130041   | 0.52215  | 0.674125    | no  |
| Cbx1     | 33.7545  | 32.2767 | -0.0645852 | 0.6783   | 0.800478    | no  |
| Cbx2     | 2.47236  | 1.87456 | -0.399337  | 0.06335  | 0.132465    | no  |
| Cbx3     | 136.704  | 125.929 | -0.118441  | 0.4061   | 0.565051    | no  |
| Cbx4     | 22.7514  | 25.806  | 0.181754   | 0.19965  | 0.335692    | no  |
| Cbx5     | 11.5953  | 10.0071 | -0.212508  | 0.15165  | 0.269589    | no  |
| Cbx6     | 7.81909  | 8.11609 | 0.0537825  | 0.72345  | 0.832153    | no  |
| Cbx7     | 30.2478  | 34.612  | 0.194444   | 0.16995  | 0.295395    | no  |
| Cbx8     | 10.4619  | 11.2819 | 0.108863   | 0.56175  | 0.707823    | no  |
| Cby1     | 9.23155  | 11.4733 | 0.313629   | 0.119    | 0.222757    | no  |
| Cc2d1a   | 18.046   | 17.3121 | -0.0598942 | 0.6943   | 0.812015    | no  |
| Cc2d1b   | 46.651   | 47.3768 | 0.0222723  | 0.87945  | 0.93248     | no  |
| Ccar1    | 33.222   | 33.9787 | 0.0324909  | 0.81645  | 0.893991    | no  |
| Ccar2    | 30.2251  | 30.7898 | 0.0267085  | 0.88005  | 0.932752    | no  |
| Ccbl1    | 4.74837  | 5.52017 | 0.217279   | 0.2966   | 0.448346    | no  |

|          |          |          |             |         |            |     |
|----------|----------|----------|-------------|---------|------------|-----|
| Ccdc101  | 23.8088  | 23.9314  | 0.00740839  | 0.96215 | 0.979794   | no  |
| Ccdc102a | 8.10099  | 7.21256  | -0.167585   | 0.35515 | 0.512779   | no  |
| Ccdc104  | 17.6427  | 16.3276  | -0.11176    | 0.51025 | 0.66358    | no  |
| Ccdc107  | 18.2859  | 23.5395  | 0.364351    | 0.05215 | 0.11265    | no  |
| Ccdc109b | 8.35108  | 6.09525  | -0.454277   | 0.03285 | 0.0761651  | no  |
| Ccdc115  | 22.809   | 25.4831  | 0.159938    | 0.2993  | 0.45147    | no  |
| Ccdc117  | 14.4739  | 16.5333  | 0.191917    | 0.2071  | 0.34525    | no  |
| Ccdc12   | 164.319  | 160.083  | -0.0376773  | 0.79125 | 0.878196   | no  |
| Ccdc124  | 81.8657  | 79.2622  | -0.0466251  | 0.75125 | 0.851338   | no  |
| Ccdc125  | 9.60617  | 13.2785  | 0.467062    | 0.0467  | 0.102656   | no  |
| Ccdc126  | 2.07464  | 2.23854  | 0.109694    | 0.66535 | 0.790855   | no  |
| Ccdc127  | 8.20974  | 7.8607   | -0.0626788  | 0.7051  | 0.819594   | no  |
| Ccdc130  | 9.97152  | 9.48213  | -0.0726025  | 0.6728  | 0.796357   | no  |
| Ccdc132  | 6.24771  | 6.38213  | 0.0307109   | 0.8542  | 0.917352   | no  |
| Ccdc134  | 18.5608  | 17.8515  | -0.0562092  | 0.7248  | 0.833108   | no  |
| Ccdc137  | 8.67974  | 9.39959  | 0.114946    | 0.56735 | 0.712412   | no  |
| Ccdc138  | 1.79294  | 2.3173   | 0.370117    | 0.1421  | 0.256016   | no  |
| Ccdc14   | 1.1813   | 1.09539  | -0.108935   | 0.6676  | 0.792555   | no  |
| Ccdc142  | 6.31006  | 7.43125  | 0.235951    | 0.26345 | 0.410002   | no  |
| Ccdc15   | 0.912902 | 1.09929  | 0.268037    | 0.3377  | 0.49398    | no  |
| Ccdc157  | 1.09549  | 1.73078  | 0.659837    | 0.0666  | 0.137937   | no  |
| Ccdc163  | 5.97919  | 4.16614  | -0.521239   | 0.03565 | 0.0816672  | no  |
| Ccdc166  | 6.76121  | 6.50014  | -0.0568115  | 0.75155 | 0.851514   | no  |
| Ccdc167  | 10.8218  | 11.1547  | 0.0437104   | 0.9149  | 0.953407   | no  |
| Ccdc17   | 1.73519  | 1.79257  | 0.0469339   | 0.96525 | 0.98104    | no  |
| Ccdc171  | 1.78807  | 2.04143  | 0.191177    | 0.36915 | 0.527767   | no  |
| Ccdc173  | 0.813371 | 1.19837  | 0.559089    | 0.13535 | 0.246804   | no  |
| Ccdc174  | 19.4633  | 18.3413  | -0.0856613  | 0.59835 | 0.738438   | no  |
| Ccdc176  | 0.670848 | 1.21476  | 0.85662     | 0.25015 | 0.395672   | no  |
| Ccdc18   | 1.11842  | 0.767935 | -0.542408   | 0.03735 | 0.0849194  | no  |
| Ccdc181  | 5.68672  | 5.35981  | -0.0854142  | 0.665   | 0.790518   | no  |
| Ccdc22   | 13.8691  | 15.1391  | 0.126406    | 0.4555  | 0.613095   | no  |
| Ccdc23   | 52.8958  | 49.3595  | -0.0998255  | 0.53865 | 0.688326   | no  |
| Ccdc25   | 26.8895  | 26.3312  | -0.030268   | 0.8418  | 0.909585   | no  |
| Ccdc28a  | 6.24113  | 6.87806  | 0.140194    | 0.53675 | 0.686918   | no  |
| Ccdc28b  | 4.02193  | 4.47713  | 0.154689    | 0.60395 | 0.742855   | no  |
| Ccdc30   | 2.3242   | 2.81541  | 0.276607    | 0.20185 | 0.338464   | no  |
| Ccdc32   | 15.7679  | 15.0504  | -0.0671866  | 0.68405 | 0.804761   | no  |
| Ccdc34   | 6.5153   | 4.27683  | -0.60729    | 0.0027  | 0.00870467 | yes |
| Ccdc43   | 14.8508  | 14.3547  | -0.0490182  | 0.75675 | 0.854908   | no  |
| Ccdc47   | 31.8516  | 33.5708  | 0.0758427   | 0.598   | 0.738122   | no  |
| Ccdc50   | 32.0574  | 28.2866  | -0.180535   | 0.20615 | 0.344032   | no  |
| Ccdc51   | 4.67274  | 4.92435  | 0.0756655   | 0.70405 | 0.818778   | no  |
| Ccdc53   | 42.9032  | 42.6245  | -0.00940172 | 0.95175 | 0.97415    | no  |
| Ccdc55   | 11.2851  | 12.2071  | 0.113308    | 0.4706  | 0.627105   | no  |
| Ccdc58   | 9.39383  | 9.0673   | -0.0510406  | 0.8283  | 0.901373   | no  |
| Ccdc59   | 40.0117  | 37.7214  | -0.0850399  | 0.5861  | 0.728325   | no  |
| Ccdc6    | 13.1305  | 14.3695  | 0.13009     | 0.3694  | 0.527975   | no  |
| Ccdc61   | 13.6015  | 13.0815  | -0.0562378  | 0.73225 | 0.838367   | no  |
| Ccdc64   | 27.0923  | 30.4692  | 0.169467    | 0.263   | 0.409437   | no  |
| Ccdc66   | 13.6159  | 12.8835  | -0.0797684  | 0.7644  | 0.860191   | no  |
| Ccdc69   | 37.1009  | 34.7042  | -0.0963444  | 0.53095 | 0.681807   | no  |
| Ccdc71   | 15.0848  | 13.7695  | -0.131614   | 0.4023  | 0.56128    | no  |
| Ccdc71l  | 13.8218  | 11.4537  | -0.271129   | 0.072   | 0.147225   | no  |
| Ccdc77   | 5.32602  | 4.34826  | -0.292618   | 0.63085 | 0.764406   | no  |
| Ccdc84   | 12.9648  | 13.215   | 0.0275863   | 0.9814  | 0.989348   | no  |
| Ccdc85b  | 8.20413  | 8.88707  | 0.115358    | 0.45405 | 0.611727   | no  |



|         |          |          |             |          |             |     |
|---------|----------|----------|-------------|----------|-------------|-----|
| Ccdc86  | 5.72609  | 6.25826  | 0.128211    | 0.4765   | 0.63271     | no  |
| Ccdc88b | 67.6435  | 69.2812  | 0.0345115   | 0.80385  | 0.886272    | no  |
| Ccdc88c | 86.3658  | 85.628   | -0.0123784  | 0.93205  | 0.962853    | no  |
| Ccdc9   | 26.6278  | 27.2252  | 0.0320068   | 0.8291   | 0.901827    | no  |
| Ccdc90b | 2.86155  | 2.64458  | -0.113755   | 0.66485  | 0.790407    | no  |
| Ccdc91  | 3.18761  | 4.25022  | 0.415063    | 0.04945  | 0.107745    | no  |
| Ccdc92  | 9.06133  | 11.1555  | 0.299962    | 0.07925  | 0.159353    | no  |
| Ccdc93  | 10.4099  | 9.9359   | -0.0672377  | 0.64295  | 0.773847    | no  |
| Ccdc94  | 15.4043  | 13.6102  | -0.178639   | 0.3199   | 0.474542    | no  |
| Ccdc97  | 29.6562  | 27.9542  | -0.0852658  | 0.55565  | 0.702722    | no  |
| Cchcr1  | 10.7853  | 7.91171  | -0.447006   | 0.00885  | 0.0246381   | yes |
| Ccin    | 1.19636  | 1.13495  | -0.0760268  | 0.8142   | 0.892483    | no  |
| Ccl25   | 1.37014  | 1.63159  | 0.251956    | 0.5165   | 0.669254    | no  |
| Ccl27a  | 3.64618  | 2.66353  | -0.453047   | 0.41815  | 0.576747    | no  |
| Ccl3    | 178.659  | 65.2524  | -1.45311    | 5.00E-05 | 0.000236281 | yes |
| Ccl4    | 285.446  | 145.813  | -0.969099   | 5.00E-05 | 0.000236281 | yes |
| Ccl5    | 19807.6  | 12463.3  | -0.668369   | 0.018    | 0.0454732   | yes |
| Ccl6    | 2.503    | 1.42108  | -0.816673   | 0.01975  | 0.0492996   | yes |
| Ccl9    | 5.23507  | 2.84873  | -0.877889   | 5.00E-05 | 0.000236281 | yes |
| Ccm2    | 57.983   | 62.2494  | 0.10243     | 0.476    | 0.632212    | no  |
| Ccna2   | 49.0848  | 26.8185  | -0.872045   | 5.00E-05 | 0.000236281 | yes |
| Ccnb1   | 20.9379  | 11.5462  | -0.858701   | 5.00E-05 | 0.000236281 | yes |
| Ccnb2   | 57.9815  | 32.8512  | -0.819648   | 5.00E-05 | 0.000236281 | yes |
| Ccnc    | 15.9982  | 13.819   | -0.211249   | 0.3475   | 0.504634    | no  |
| Ccnd2   | 29.0314  | 25.7612  | -0.172411   | 0.2239   | 0.366131    | no  |
| Ccnd3   | 173.651  | 133.467  | -0.379704   | 0.01975  | 0.0492996   | yes |
| Ccndbp1 | 87.3966  | 81.5871  | -0.0992371  | 0.48955  | 0.644545    | no  |
| Ccne1   | 20.645   | 14.3657  | -0.523163   | 0.00165  | 0.00562393  | yes |
| Ccne2   | 1.65354  | 0.990963 | -0.738657   | 0.342    | 0.498607    | no  |
| Ccnf    | 10.4184  | 6.4639   | -0.68866    | 1.00E-04 | 0.000450026 | yes |
| Ccng1   | 48.0962  | 56.7223  | 0.237993    | 0.0929   | 0.181908    | no  |
| Ccng2   | 37.7837  | 29.6438  | -0.350033   | 0.01635  | 0.041841    | yes |
| Ccnh    | 15.6764  | 14.5436  | -0.10821    | 0.51255  | 0.665639    | no  |
| Ccni    | 87.6162  | 77.5091  | -0.176833   | 0.21185  | 0.351425    | no  |
| Ccnj    | 3.08541  | 3.44622  | 0.159554    | 0.4003   | 0.559285    | no  |
| Ccnk    | 35.9861  | 34.787   | -0.0488941  | 0.7368   | 0.841679    | no  |
| Ccnl1   | 155.824  | 154.795  | -0.00956234 | 0.94565  | 0.970482    | no  |
| Ccnl2   | 95.0603  | 96.1079  | 0.0158115   | 0.9118   | 0.951599    | no  |
| Ccno    | 1.05571  | 0.463176 | -1.18858    | 0.00845  | 0.023657    | yes |
| Ccnt1   | 15.5618  | 15.8869  | 0.0298322   | 0.853    | 0.916538    | no  |
| Ccnt2   | 25.1017  | 26.2224  | 0.0630142   | 0.6629   | 0.789178    | no  |
| Ccny    | 23.3332  | 25.3256  | 0.118208    | 0.40335  | 0.562311    | no  |
| Ccnyl1  | 3.10954  | 2.99764  | -0.0528732  | 0.79225  | 0.878781    | no  |
| Ccp110  | 3.95411  | 3.02824  | -0.384872   | 0.0314   | 0.073338    | no  |
| Ccp1    | 39.9493  | 37.9237  | -0.075071   | 0.6289   | 0.762711    | no  |
| Ccp1os  | 4.40281  | 4.27238  | -0.0433851  | 0.88945  | 0.938066    | no  |
| Ccr10   | 0.508405 | 1.602    | 1.65582     | 7.00E-04 | 0.00261609  | yes |
| Ccr2    | 167.479  | 187.504  | 0.162939    | 0.25645  | 0.401445    | no  |
| Ccr5    | 75.1431  | 58.0739  | -0.371751   | 0.00965  | 0.026603    | yes |
| Ccr7    | 5.68635  | 8.8038   | 0.630623    | 0.0013   | 0.00454533  | yes |
| Ccrl2   | 1.2001   | 1.04313  | -0.202247   | 0.53005  | 0.68106     | no  |
| Ccrn4l  | 5.11454  | 5.73066  | 0.164096    | 0.3644   | 0.522649    | no  |
| Ccs     | 36.2989  | 41.7479  | 0.201776    | 0.202    | 0.338651    | no  |
| Ccsap   | 5.72506  | 4.96212  | -0.206335   | 0.2676   | 0.414997    | no  |
| Ccser2  | 17.5717  | 15.9212  | -0.142302   | 0.32755  | 0.483068    | no  |
| Cct2    | 209.159  | 198.685  | -0.0741173  | 0.60155  | 0.741117    | no  |
| Cct3    | 85.7769  | 90.8937  | 0.0835912   | 0.55875  | 0.70553     | no  |

|         |         |         |             |          |             |     |
|---------|---------|---------|-------------|----------|-------------|-----|
| Cct4    | 136.524 | 118.865 | -0.199825   | 0.1579   | 0.278622    | no  |
| Cct5    | 175.847 | 163.184 | -0.107823   | 0.43965  | 0.597631    | no  |
| Cct6a   | 68.1426 | 74.1833 | 0.122537    | 0.3821   | 0.541152    | no  |
| Cct7    | 95.9229 | 89.6506 | -0.0975618  | 0.4988   | 0.653045    | no  |
| Cct8    | 107.69  | 104.603 | -0.0419614  | 0.7966   | 0.881556    | no  |
| Ccz1    | 44.1702 | 42.8566 | -0.0435537  | 0.76745  | 0.862111    | no  |
| Cd101   | 2.11358 | 1.68382 | -0.327948   | 0.15295  | 0.271483    | no  |
| Cd151   | 4.39837 | 4.04387 | -0.121235   | 0.57725  | 0.720894    | no  |
| Cd160   | 51.6494 | 43.8506 | -0.236156   | 0.1034   | 0.198649    | no  |
| Cd163l1 | 15.824  | 31.8422 | 1.00882     | 5.00E-05 | 0.000236281 | yes |
| Cd164   | 177.596 | 187.895 | 0.0813294   | 0.56965  | 0.714347    | no  |
| Cd1d1   | 22.1226 | 20.5296 | -0.107816   | 0.4925   | 0.647222    | no  |
| Cd2     | 496.474 | 495.641 | -0.00242459 | 0.9869   | 0.992412    | no  |
| Cd200r1 | 1.01373 | 1.17085 | 0.207887    | 0.5466   | 0.695112    | no  |
| Cd200r4 | 11.8483 | 10.1757 | -0.219544   | 0.2233   | 0.365378    | no  |
| Cd209c  | 1.7878  | 2.02336 | 0.178569    | 0.5577   | 0.704519    | no  |
| Cd22    | 2.48474 | 1.60946 | -0.626514   | 0.0042   | 0.0128487   | yes |
| Cd226   | 76.4138 | 73.8759 | -0.0487299  | 0.7301   | 0.836666    | no  |
| Cd244   | 1.5712  | 1.42865 | -0.137212   | 0.56935  | 0.714111    | no  |
| Cd247   | 266.146 | 259.893 | -0.0342972  | 0.8176   | 0.894764    | no  |
| Cd27    | 175.423 | 191.292 | 0.12494     | 0.4834   | 0.638927    | no  |
| Cd274   | 10.5048 | 10.8704 | 0.0493556   | 0.7509   | 0.85116     | no  |
| Cd28    | 52.5749 | 72.0482 | 0.454587    | 0.0015   | 0.00516454  | yes |
| Cd2ap   | 3.37213 | 5.06522 | 0.586966    | 7.00E-04 | 0.00261609  | yes |
| Cd2bp2  | 51.7157 | 51.6413 | -0.00207662 | 0.988    | 0.992966    | no  |
| Cd320   | 1.92048 | 3.55714 | 0.889255    | 0.00025  | 0.00103712  | yes |
| Cd37    | 245.766 | 232.16  | -0.0821687  | 0.5609   | 0.707194    | no  |
| Cd38    | 5.3881  | 5.26433 | -0.0335257  | 0.8545   | 0.917591    | no  |
| Cd3d    | 509.127 | 539.194 | 0.0827782   | 0.5618   | 0.707861    | no  |
| Cd3e    | 358.165 | 330.653 | -0.115306   | 0.41845  | 0.577025    | no  |
| Cd3eap  | 4.36091 | 4.80496 | 0.139896    | 0.6446   | 0.775145    | no  |
| Cd3g    | 687.898 | 679.069 | -0.0186366  | 0.8995   | 0.944432    | no  |
| Cd40lg  | 11.958  | 22.2926 | 0.898584    | 5.00E-05 | 0.000236281 | yes |
| Cd44    | 36.766  | 43.2473 | 0.234239    | 0.1005   | 0.194092    | no  |
| Cd46    | 1.15455 | 1.27618 | 0.144509    | 0.71665  | 0.827514    | no  |
| Cd47    | 180.728 | 185.84  | 0.0402416   | 0.7791   | 0.870074    | no  |
| Cd48    | 658.156 | 596.715 | -0.141387   | 0.3337   | 0.489631    | no  |
| Cd5     | 243.804 | 254.096 | 0.0596535   | 0.67375  | 0.797067    | no  |
| Cd52    | 3538.29 | 2989.95 | -0.242932   | 0.10425  | 0.199972    | no  |
| Cd53    | 165.954 | 190.254 | 0.197141    | 0.16975  | 0.295128    | no  |
| Cd55    | 11.8494 | 20.0132 | 0.756134    | 5.00E-05 | 0.000236281 | yes |
| Cd6     | 237     | 252.668 | 0.092357    | 0.52115  | 0.673215    | no  |
| Cd68    | 27.2851 | 33.1789 | 0.282153    | 0.0772   | 0.155947    | no  |
| Cd69    | 77.5439 | 99.0046 | 0.352482    | 0.01375  | 0.0360527   | yes |
| Cd7     | 205.865 | 322.285 | 0.646644    | 5.00E-05 | 0.000236281 | yes |
| Cd72    | 18.7523 | 33.2414 | 0.825916    | 0.00055  | 0.0021091   | yes |
| Cd74    | 9.21543 | 10.3702 | 0.170325    | 0.3959   | 0.554972    | no  |
| Cd79b   | 5.25972 | 15.7399 | 1.58137     | 5.00E-05 | 0.000236281 | yes |
| Cd80    | 4.13526 | 3.37488 | -0.293142   | 0.2169   | 0.357667    | no  |
| Cd82    | 246.925 | 285.356 | 0.208693    | 0.14645  | 0.262054    | no  |
| Cd84    | 67.208  | 61.2745 | -0.133346   | 0.35135  | 0.508708    | no  |
| Cd86    | 10.354  | 10.5349 | 0.0249846   | 0.88095  | 0.933257    | no  |
| Cd8a    | 561.161 | 501.936 | -0.160911   | 0.301    | 0.453424    | no  |
| Cd8b1   | 1370.36 | 1233.12 | -0.152236   | 0.3285   | 0.484034    | no  |
| Cd9     | 10.8483 | 10.3699 | -0.0650648  | 0.7409   | 0.844367    | no  |
| Cd96    | 129.064 | 138.756 | 0.104456    | 0.4608   | 0.617919    | no  |
| Cd97    | 296.629 | 303.606 | 0.0335391   | 0.82805  | 0.901199    | no  |

|          |         |         |            |          |             |     |
|----------|---------|---------|------------|----------|-------------|-----|
| Cd99l2   | 4.06089 | 4.16754 | 0.0373985  | 0.83955  | 0.908044    | no  |
| Cdadcl   | 18.4524 | 18.2861 | -0.0130551 | 0.93535  | 0.964864    | no  |
| Cdan1    | 8.33897 | 8.20823 | -0.0227985 | 0.8798   | 0.932627    | no  |
| Cdc123   | 47.573  | 44.2412 | -0.104754  | 0.4777   | 0.633814    | no  |
| Cdc14a   | 11.0779 | 10.6843 | -0.0521844 | 0.7308   | 0.837264    | no  |
| Cdc14b   | 7.42835 | 8.6107  | 0.213088   | 0.23315  | 0.377107    | no  |
| Cdc16    | 25.6511 | 24.0472 | -0.0931545 | 0.53015  | 0.681102    | no  |
| Cdc20    | 31.8309 | 18.3573 | -0.794077  | 0.015    | 0.0388553   | yes |
| Cdc20b   | 6.06003 | 2.47102 | -1.29422   | 1.00E-04 | 0.000450026 | yes |
| Cdc23    | 15.3341 | 13.3369 | -0.201321  | 0.4552   | 0.612878    | no  |
| Cdc25a   | 5.12098 | 4.64907 | -0.13948   | 0.42395  | 0.582266    | no  |
| Cdc25b   | 132.896 | 156.182 | 0.232932   | 0.1004   | 0.193942    | no  |
| Cdc25c   | 4.0357  | 2.26876 | -0.830917  | 0.0014   | 0.00485767  | yes |
| Cdc26    | 45.6618 | 42.829  | -0.0923997 | 0.56855  | 0.713424    | no  |
| Cdc27    | 14.2948 | 13.2932 | -0.104807  | 0.47495  | 0.631305    | no  |
| Cdc34    | 86.3945 | 75.4234 | -0.195927  | 0.1733   | 0.300058    | no  |
| Cdc37    | 124.798 | 111.423 | -0.163547  | 0.2464   | 0.391548    | no  |
| Cdc37l1  | 13.4446 | 13.6908 | 0.0261824  | 0.87025  | 0.927043    | no  |
| Cdc40    | 23.2151 | 23.69   | 0.0292096  | 0.8414   | 0.90932     | no  |
| Cdc42    | 483.844 | 429.318 | -0.172497  | 0.2404   | 0.385591    | no  |
| Cdc42bpg | 3.34943 | 3.74272 | 0.160168   | 0.3499   | 0.507232    | no  |
| Cdc42ep3 | 41.9933 | 47.5556 | 0.179458   | 0.21375  | 0.353812    | no  |
| Cdc42se1 | 214.115 | 224.528 | 0.068509   | 0.72065  | 0.830312    | no  |
| Cdc42se2 | 82.2662 | 82.6581 | 0.00685612 | 0.963    | 0.980065    | no  |
| Cdc45    | 16.3589 | 8.77918 | -0.89792   | 5.00E-05 | 0.000236281 | yes |
| Cdc5l    | 46.216  | 42.1441 | -0.133062  | 0.354    | 0.511621    | no  |
| Cdc6     | 4.37959 | 2.03479 | -1.10592   | 5.00E-05 | 0.000236281 | yes |
| Cdc7     | 11.0853 | 8.09505 | -0.453532  | 0.00585  | 0.01717     | yes |
| Cdc73    | 21.9915 | 22.2807 | 0.0188482  | 0.8966   | 0.942579    | no  |
| Cdca2    | 7.50938 | 4.45716 | -0.752568  | 5.00E-05 | 0.000236281 | yes |
| Cdca3    | 41.8486 | 23.797  | -0.814396  | 5.00E-05 | 0.000236281 | yes |
| Cdca4    | 29.6977 | 24.2743 | -0.290921  | 0.0491   | 0.107098    | no  |
| Cdca5    | 14.6953 | 7.552   | -0.960428  | 5.00E-05 | 0.000236281 | yes |
| Cdca7    | 11.1395 | 7.72397 | -0.528267  | 0.002    | 0.0066678   | yes |
| Cdca7l   | 20.8796 | 19.3296 | -0.111283  | 0.51375  | 0.666645    | no  |
| Cdca8    | 39.4533 | 22.8852 | -0.785729  | 5.00E-05 | 0.000236281 | yes |
| Cdh24    | 6.78043 | 7.30703 | 0.107907   | 0.5307   | 0.68156     | no  |
| Cdip1    | 7.50069 | 6.9936  | -0.100988  | 0.66055  | 0.787483    | no  |
| Cdipt    | 75.9838 | 88.0994 | 0.213441   | 0.1313   | 0.241006    | no  |
| Cdk1     | 19.7184 | 10.6824 | -0.884303  | 5.00E-05 | 0.000236281 | yes |
| Cdk10    | 14.1287 | 15.2988 | 0.11479    | 0.50115  | 0.655356    | no  |
| Cdk11b   | 62.9106 | 64.1171 | 0.0274054  | 0.84615  | 0.912062    | no  |
| Cdk12    | 13.1209 | 14.4408 | 0.138285   | 0.36825  | 0.526854    | no  |
| Cdk13    | 22.3673 | 21.9143 | -0.0295149 | 0.8353   | 0.90564     | no  |
| Cdk16    | 16.1929 | 16.8053 | 0.0535466  | 0.72945  | 0.836165    | no  |
| Cdk17    | 47.7318 | 47.0489 | -0.0207882 | 0.88515  | 0.935797    | no  |
| Cdk19    | 17.3106 | 16.3326 | -0.0838982 | 0.56095  | 0.707232    | no  |
| Cdk2     | 21.8298 | 14.261  | -0.614217  | 1.00E-04 | 0.000450026 | yes |
| Cdk2ap1  | 83.9966 | 72.6513 | -0.209341  | 0.1483   | 0.264727    | no  |
| Cdk2ap2  | 195.185 | 206.308 | 0.0799575  | 0.57185  | 0.716241    | no  |
| Cdk4     | 102.186 | 100.627 | -0.0221736 | 0.87295  | 0.928629    | no  |
| Cdk5     | 22.4891 | 21.8805 | -0.0395815 | 0.7975   | 0.882095    | no  |
| Cdk5r1   | 1.2056  | 1.22695 | 0.0253205  | 0.91915  | 0.955836    | no  |
| Cdk5rap1 | 12.836  | 5.98092 | -1.10176   | 5.00E-05 | 0.000236281 | yes |
| Cdk5rap2 | 7.8696  | 8.42132 | 0.0977558  | 0.52035  | 0.67244     | no  |
| Cdk5rap3 | 63.9288 | 62.8989 | -0.0234304 | 0.8644   | 0.923487    | no  |
| Cdk6     | 4.63746 | 6.62211 | 0.513955   | 0.00735  | 0.0209531   | yes |

|            |         |         |             |          |             |     |
|------------|---------|---------|-------------|----------|-------------|-----|
| Cdk7       | 5.65895 | 5.54029 | -0.0305725  | 0.87305  | 0.928694    | no  |
| Cdk8       | 14.3246 | 13.9371 | -0.0395601  | 0.8019   | 0.884923    | no  |
| Cdk9       | 35.8197 | 33.9297 | -0.0782028  | 0.57965  | 0.722944    | no  |
| Cdkal1     | 5.53856 | 5.49535 | -0.0112989  | 0.95395  | 0.975285    | no  |
| Cdkl3      | 2.07517 | 1.44504 | -0.522117   | 0.06315  | 0.132129    | no  |
| Cdkn1a     | 1.78726 | 1.32636 | -0.430277   | 0.1529   | 0.271415    | no  |
| Cdkn1b     | 59.6764 | 56.4471 | -0.0802608  | 0.57375  | 0.717894    | no  |
| Cdkn2a     | 2.44179 | 1.07529 | -1.18322    | 0.00805  | 0.0226766   | yes |
| Cdkn2aip   | 18.8487 | 16.3644 | -0.203904   | 0.17165  | 0.297807    | no  |
| Cdkn2aipnl | 61.0319 | 55.3143 | -0.14191    | 0.32035  | 0.47503     | no  |
| Cdkn2c     | 15.571  | 10.9217 | -0.511657   | 0.0084   | 0.0235339   | yes |
| Cdkn2d     | 8.22026 | 6.77577 | -0.2788     | 0.19345  | 0.327413    | no  |
| Cdkn3      | 17.3451 | 9.32178 | -0.895852   | 0.00045  | 0.0017621   | yes |
| Cdon       | 4.42532 | 5.79203 | 0.388288    | 0.01455  | 0.0378466   | yes |
| Cdpf1      | 21.4835 | 19.0029 | -0.177011   | 0.3281   | 0.483646    | no  |
| Cdr2       | 4.38809 | 4.36814 | -0.00657566 | 0.97525  | 0.986416    | no  |
| Cds2       | 40.679  | 41.8986 | 0.0426186   | 0.7976   | 0.882137    | no  |
| Cdt1       | 27.5183 | 21.0801 | -0.384507   | 0.01165  | 0.0313023   | yes |
| Cdv3       | 42.9587 | 43.5091 | 0.0183673   | 0.8971   | 0.942894    | no  |
| Cdyl       | 6.90748 | 5.85172 | -0.239299   | 0.1578   | 0.278488    | no  |
| Cdyl2      | 4.09812 | 4.1715  | 0.0256036   | 0.86425  | 0.92341     | no  |
| Ceacam16   | 1.42982 | 1.90154 | 0.411342    | 0.1977   | 0.333176    | no  |
| Cebpb      | 8.90613 | 9.96923 | 0.162683    | 0.3851   | 0.544091    | no  |
| Cebpg      | 11.3866 | 10.627  | -0.0995931  | 0.51245  | 0.665533    | no  |
| Cebpz      | 24.2467 | 26.3995 | 0.122721    | 0.4168   | 0.575346    | no  |
| Cecr5      | 92.1531 | 76.5709 | -0.267236   | 0.0605   | 0.127667    | no  |
| Cela1      | 4.85181 | 2.73475 | -0.827116   | 0.00425  | 0.0129847   | yes |
| Celf1      | 33.7165 | 31.1207 | -0.115581   | 0.42195  | 0.580344    | no  |
| Celf2      | 34.2785 | 36.0299 | 0.0718896   | 0.6168   | 0.753448    | no  |
| Celsr1     | 8.33863 | 8.59957 | 0.0444553   | 0.7556   | 0.854155    | no  |
| Cenpa      | 66.8012 | 48.696  | -0.456071   | 0.00195  | 0.00652174  | yes |
| Cenpb      | 30.8145 | 32.0241 | 0.0555487   | 0.7043   | 0.819001    | no  |
| Cenpc1     | 9.89835 | 8.20134 | -0.271329   | 0.09425  | 0.184072    | no  |
| Cenpe      | 10.2208 | 6.23755 | -0.712461   | 5.00E-05 | 0.000236281 | yes |
| Cenpf      | 5.72457 | 3.4733  | -0.720862   | 5.00E-05 | 0.000236281 | yes |
| Cenph      | 9.19773 | 4.8803  | -0.914309   | 2.00E-04 | 0.0008488   | yes |
| Cenpi      | 3.88084 | 2.473   | -0.650107   | 0.002    | 0.0066678   | yes |
| Cenpj      | 6.4989  | 5.84789 | -0.152281   | 0.3562   | 0.514011    | no  |
| Cenpk      | 4.98969 | 3.53309 | -0.498021   | 0.2921   | 0.443205    | no  |
| Cenpl      | 12.6532 | 8.97871 | -0.494925   | 0.0069   | 0.0198135   | yes |
| Cenpm      | 9.95769 | 5.70314 | -0.804055   | 0.00045  | 0.0017621   | yes |
| Cenpn      | 8.31331 | 4.34527 | -0.935976   | 5.00E-05 | 0.000236281 | yes |
| Cenpo      | 7.00433 | 6.50636 | -0.106396   | 0.703    | 0.817934    | no  |
| Cenpp      | 6.00507 | 2.46542 | -1.28435    | 0.01595  | 0.0409554   | yes |
| Cenpq      | 19.8749 | 17.9969 | -0.143194   | 0.3903   | 0.549381    | no  |
| Cenpt      | 8.40086 | 9.69321 | 0.206436    | 0.26165  | 0.407794    | no  |
| Cenpu      | 1.64965 | 1.14445 | -0.527512   | 0.383    | 0.542078    | no  |
| Cenpv      | 8.18922 | 11.2745 | 0.461271    | 0.03145  | 0.0734475   | no  |
| Cenpw      | 8.20625 | 6.16594 | -0.412402   | 0.0425   | 0.0948293   | no  |
| Cep104     | 7.61356 | 7.2925  | -0.0621573  | 0.70565  | 0.819909    | no  |
| Cep120     | 21.2638 | 20.6512 | -0.0421753  | 0.7697   | 0.863704    | no  |
| Cep128     | 2.36436 | 2.02211 | -0.225591   | 0.25145  | 0.396819    | no  |
| Cep135     | 7.59444 | 7.67263 | 0.0147773   | 0.92575  | 0.95949     | no  |
| Cep152     | 6.70621 | 7.10126 | 0.0825775   | 0.5956   | 0.736112    | no  |
| Cep164     | 9.37954 | 10.9931 | 0.229013    | 0.13045  | 0.239752    | no  |
| Cep170     | 2.33697 | 1.98069 | -0.238636   | 0.18675  | 0.318579    | no  |
| Cep170b    | 1.9864  | 2.67628 | 0.430071    | 0.01905  | 0.0477889   | yes |

|         |         |         |             |          |             |     |
|---------|---------|---------|-------------|----------|-------------|-----|
| Cep19   | 9.04131 | 13.2978 | 0.556582    | 0.00225  | 0.00740543  | yes |
| Cep192  | 14.386  | 13.4035 | -0.102055   | 0.4735   | 0.629923    | no  |
| Cep250  | 26.3194 | 24.5109 | -0.102702   | 0.4739   | 0.630289    | no  |
| Cep350  | 19.3233 | 20.1225 | 0.0584639   | 0.67985  | 0.80169     | no  |
| Cep41   | 4.11524 | 4.68176 | 0.186075    | 0.3118   | 0.465451    | no  |
| Cep44   | 10.5568 | 10.1552 | -0.0559597  | 0.76515  | 0.860664    | no  |
| Cep55   | 14.8387 | 8.67324 | -0.774725   | 5.00E-05 | 0.000236281 | yes |
| Cep57   | 25.3373 | 24.3465 | -0.057548   | 0.6944   | 0.812078    | no  |
| Cep5711 | 5.54937 | 5.03497 | -0.140341   | 0.47495  | 0.631305    | no  |
| Cep63   | 12.3469 | 12.5081 | 0.0187056   | 0.9089   | 0.949752    | no  |
| Cep68   | 8.16214 | 9.86395 | 0.273218    | 0.07745  | 0.15638     | no  |
| Cep70   | 3.37691 | 3.46449 | 0.0369411   | 0.85885  | 0.920092    | no  |
| Cep72   | 2.03293 | 1.88433 | -0.109509   | 0.62355  | 0.758687    | no  |
| Cep76   | 8.39175 | 9.57387 | 0.190131    | 0.22515  | 0.367672    | no  |
| Cep78   | 4.83073 | 4.9703  | 0.0410899   | 0.82705  | 0.900735    | no  |
| Cep85   | 13.2747 | 12.6667 | -0.0676409  | 0.65385  | 0.782469    | no  |
| Cep89   | 4.50553 | 4.2975  | -0.0682007  | 0.72625  | 0.834163    | no  |
| Cep95   | 17.9261 | 18.5482 | 0.0492232   | 0.7478   | 0.849091    | no  |
| Cep97   | 17.4307 | 16.8408 | -0.049674   | 0.84895  | 0.913842    | no  |
| Cept1   | 19.6245 | 18.615  | -0.0761911  | 0.75995  | 0.857192    | no  |
| Cercam  | 11.0545 | 9.07887 | -0.284053   | 0.08515  | 0.169235    | no  |
| Cerk    | 7.73794 | 9.18128 | 0.246746    | 0.1173   | 0.220164    | no  |
| Cerkl   | 20.863  | 16.9337 | -0.301046   | 0.82115  | 0.896953    | no  |
| Cers2   | 97.8831 | 93.1137 | -0.0720657  | 0.66005  | 0.787086    | no  |
| Cers4   | 12.6038 | 11.3627 | -0.149558   | 0.32805  | 0.483603    | no  |
| Cers5   | 47.8805 | 44.1914 | -0.115672   | 0.42025  | 0.578739    | no  |
| Cers6   | 1.60927 | 2.57803 | 0.679861    | 0.00235  | 0.00770045  | yes |
| Cetn2   | 64.2701 | 61.2952 | -0.0683736  | 0.63895  | 0.770741    | no  |
| Cetn3   | 52.3243 | 51.1582 | -0.0325166  | 0.835    | 0.905481    | no  |
| Cfdp1   | 64.805  | 65.4305 | 0.0138583   | 0.9209   | 0.956979    | no  |
| Cfl1    | 1986.59 | 1702.59 | -0.222563   | 0.16745  | 0.292115    | no  |
| Cfl2    | 3.93768 | 3.76582 | -0.0643817  | 0.74265  | 0.845624    | no  |
| Cflar   | 24.1849 | 24.1865 | 9.29E-05    | 0.9993   | 0.999342    | no  |
| Cfp     | 3.20726 | 2.65806 | -0.270965   | 0.3012   | 0.453677    | no  |
| Cggbp1  | 44.8425 | 42.1806 | -0.0882875  | 0.53145  | 0.68225     | no  |
| Cgrrf1  | 6.11231 | 6.39437 | 0.0650852   | 0.7701   | 0.863974    | no  |
| Chac2   | 1.70556 | 1.57689 | -0.113159   | 0.8553   | 0.917975    | no  |
| Chaf1a  | 11.6788 | 6.93205 | -0.752541   | 5.00E-05 | 0.000236281 | yes |
| Chaf1b  | 23.5908 | 20.8751 | -0.176443   | 0.2557   | 0.4006      | no  |
| Champ1  | 9.99955 | 10.6093 | 0.0853977   | 0.58205  | 0.724964    | no  |
| Chchd1  | 63.7172 | 63.937  | 0.00496809  | 0.97625  | 0.98689     | no  |
| Chchd10 | 2.73581 | 3.934   | 0.524027    | 0.09155  | 0.179714    | no  |
| Chchd2  | 142.479 | 135.714 | -0.0701748  | 0.6171   | 0.753697    | no  |
| Chchd3  | 60.3369 | 60.7196 | 0.00912356  | 0.94775  | 0.97186     | no  |
| Chchd4  | 7.75109 | 8.18791 | 0.0790973   | 0.70345  | 0.818282    | no  |
| Chchd5  | 11.2827 | 11.3724 | 0.0114318   | 0.94945  | 0.972783    | no  |
| Chchd6  | 1.33729 | 1.02682 | -0.381132   | 0.3671   | 0.525518    | no  |
| Chchd7  | 23.9531 | 26.7162 | 0.157502    | 0.44045  | 0.598453    | no  |
| Chd1    | 17.6767 | 20.5685 | 0.218584    | 0.12065  | 0.2252      | no  |
| Chd1l   | 22.7322 | 21.9804 | -0.0485187  | 0.74305  | 0.845862    | no  |
| Chd2    | 28.272  | 28.2055 | -0.00340195 | 0.9831   | 0.990255    | no  |
| Chd3    | 50.2886 | 55.0394 | 0.130233    | 0.36335  | 0.521546    | no  |
| Chd4    | 67.1672 | 80.7437 | 0.265591    | 0.06045  | 0.127596    | no  |
| Chd6    | 6.08633 | 7.4979  | 0.300914    | 0.0392   | 0.0884928   | no  |
| Chd7    | 29.4272 | 27.003  | -0.124027   | 0.3797   | 0.538661    | no  |
| Chd8    | 32.1562 | 32.9685 | 0.0359908   | 0.79225  | 0.878781    | no  |
| Chd9    | 4.54649 | 5.35164 | 0.235228    | 0.11395  | 0.215026    | no  |

|         |         |          |             |          |             |     |
|---------|---------|----------|-------------|----------|-------------|-----|
| Chek1   | 3.12865 | 1.41095  | -1.14888    | 5.00E-05 | 0.000236281 | yes |
| Chek2   | 4.66837 | 4.31905  | -0.112204   | 0.58105  | 0.724166    | no  |
| Cherp   | 34.3006 | 34.4428  | 0.00596935  | 0.96785  | 0.982494    | no  |
| Chfr    | 56.2955 | 54.3272  | -0.0513456  | 0.7216   | 0.830945    | no  |
| Chic2   | 55.4549 | 51.1033  | -0.117899   | 0.44055  | 0.598519    | no  |
| Chid1   | 5.81718 | 6.65255  | 0.193588    | 0.26015  | 0.405896    | no  |
| Chit1   | 1.93539 | 0.486072 | -1.99338    | 5.00E-05 | 0.000236281 | yes |
| Chka    | 1.97227 | 2.30147  | 0.2227      | 0.35095  | 0.508295    | no  |
| Chkb    | 39.2509 | 38.5186  | -0.0271724  | 0.86195  | 0.921972    | no  |
| Chm     | 9.85163 | 10.4328  | 0.0826929   | 0.58415  | 0.726823    | no  |
| Chml    | 1.50344 | 1.4014   | -0.101401   | 0.62585  | 0.760449    | no  |
| Chmp1a  | 86.8024 | 83.2954  | -0.0594984  | 0.6758   | 0.798689    | no  |
| Chmp1b  | 39.4221 | 40.8455  | 0.0511701   | 0.8081   | 0.888874    | no  |
| Chmp2a  | 141.528 | 127.561  | -0.149903   | 0.29645  | 0.448158    | no  |
| Chmp2b  | 17.4407 | 19.1365  | 0.133873    | 0.40615  | 0.565098    | no  |
| Chmp3   | 27.895  | 22.8508  | -0.287758   | 0.0557   | 0.119202    | no  |
| Chmp4b  | 172.44  | 159.904  | -0.108886   | 0.44395  | 0.601714    | no  |
| Chmp5   | 72.5792 | 69.0152  | -0.0726415  | 0.61845  | 0.754706    | no  |
| Chmp6   | 30.4047 | 26.5215  | -0.197137   | 0.20875  | 0.347377    | no  |
| Chmp7   | 21.9613 | 19.9442  | -0.138996   | 0.3501   | 0.507449    | no  |
| Chn2    | 2.86556 | 2.74163  | -0.0637845  | 0.7611   | 0.85793     | no  |
| Chordc1 | 56.6437 | 57.8276  | 0.0298421   | 0.8359   | 0.905956    | no  |
| Chp1    | 72.5921 | 65.6325  | -0.145403   | 0.29695  | 0.44876     | no  |
| Chpf    | 12.5127 | 12.629   | 0.0133409   | 0.9331   | 0.963486    | no  |
| Chpf2   | 18.6035 | 18.8292  | 0.0173975   | 0.90605  | 0.948291    | no  |
| Chpt1   | 8.90143 | 6.19688  | -0.522495   | 0.01165  | 0.0313023   | yes |
| Chrac1  | 31.7582 | 36.046   | 0.182711    | 0.2812   | 0.431012    | no  |
| Chrna2  | 1.39516 | 1.37464  | -0.0213688  | 0.9281   | 0.960727    | no  |
| Chrnbl  | 0.7851  | 1.65308  | 1.07421     | 0.00255  | 0.00827285  | yes |
| Chrne   | 1.66432 | 0.996329 | -0.740242   | 0.05975  | 0.126489    | no  |
| Chst10  | 21.4183 | 22.9629  | 0.100458    | 0.49045  | 0.645441    | no  |
| Chst11  | 15.5796 | 15.7325  | 0.0140837   | 0.9205   | 0.956718    | no  |
| Chst12  | 17.8845 | 15.737   | -0.184551   | 0.25935  | 0.404979    | no  |
| Chst14  | 1.31514 | 1.24207  | -0.082468   | 0.7853   | 0.874329    | no  |
| Chst2   | 2.48075 | 1.56821  | -0.661662   | 0.00075  | 0.00278555  | yes |
| Chsy1   | 139.537 | 93.3466  | -0.579978   | 5.00E-05 | 0.000236281 | yes |
| Chtf18  | 4.20502 | 2.54344  | -0.725333   | 7.00E-04 | 0.00261609  | yes |
| Chtf8   | 66.3269 | 63.5399  | -0.0619308  | 0.6663   | 0.79161     | no  |
| Chtop   | 89.1009 | 86.5624  | -0.0416996  | 0.77165  | 0.86508     | no  |
| Chuk    | 36.4171 | 35.4751  | -0.0378094  | 0.7906   | 0.877861    | no  |
| Churc1  | 95.8109 | 92.1377  | -0.0563991  | 0.71785  | 0.828249    | no  |
| Ciao1   | 14.0629 | 14.568   | 0.0509054   | 0.73995  | 0.843639    | no  |
| Ciapi1  | 8.16954 | 8.92894  | 0.128234    | 0.4084   | 0.567312    | no  |
| Ciart   | 4.75899 | 4.35786  | -0.127035   | 0.59215  | 0.733351    | no  |
| Cib1    | 88.1571 | 84.0208  | -0.0693303  | 0.63975  | 0.771311    | no  |
| Cib2    | 1.29081 | 0.938699 | -0.459538   | 0.39605  | 0.555039    | no  |
| Cic     | 33.0339 | 30.9089  | -0.0959262  | 0.49945  | 0.653678    | no  |
| Cinp    | 6.60126 | 7.19093  | 0.123438    | 0.5142   | 0.667057    | no  |
| Cipc    | 20.0153 | 17.1153  | -0.225813   | 0.12045  | 0.224922    | no  |
| Cir1    | 27.6983 | 27.5649  | -0.00696637 | 0.96225  | 0.979811    | no  |
| Cirbp   | 42.2239 | 46.9244  | 0.15228     | 0.3148   | 0.468621    | no  |
| Cirh1a  | 16.3467 | 18.1012  | 0.147083    | 0.34735  | 0.504489    | no  |
| Cisd1   | 27.4231 | 28.2272  | 0.041695    | 0.8034   | 0.8859      | no  |
| Cisd2   | 16.1484 | 15.6229  | -0.0477287  | 0.75895  | 0.856543    | no  |
| Cisd3   | 41.3937 | 44.6353  | 0.108772    | 0.5198   | 0.671902    | no  |
| Cish    | 8.5916  | 8.89125  | 0.0494605   | 0.7747   | 0.867136    | no  |
| Cit     | 3.69854 | 2.51418  | -0.556869   | 0.00145  | 0.00501121  | yes |

|         |          |         |            |          |             |     |
|---------|----------|---------|------------|----------|-------------|-----|
| Cited2  | 74.2504  | 65.7207 | -0.176051  | 0.2222   | 0.363924    | no  |
| Ciz1    | 37.8706  | 37.2807 | -0.0226479 | 0.8756   | 0.930257    | no  |
| Ckap2   | 10.6144  | 5.93291 | -0.839217  | 5.00E-05 | 0.000236281 | yes |
| Ckap2l  | 13.6317  | 7.42222 | -0.877044  | 5.00E-05 | 0.000236281 | yes |
| Ckap5   | 18.5865  | 14.5665 | -0.351598  | 0.01575  | 0.0405023   | yes |
| Ckb     | 1.46818  | 1.0851  | -0.43619   | 0.23025  | 0.373649    | no  |
| Cklf    | 40.5046  | 36.5684 | -0.147488  | 0.41625  | 0.574879    | no  |
| Cks1b   | 64.8822  | 38.5237 | -0.752078  | 5.00E-05 | 0.000236281 | yes |
| Cks2    | 129.351  | 102.463 | -0.336186  | 0.0241   | 0.0586359   | no  |
| Clasp1  | 6.25943  | 6.49605 | 0.0535299  | 0.7278   | 0.835088    | no  |
| Clasp2  | 8.53937  | 7.85213 | -0.121046  | 0.4164   | 0.575018    | no  |
| Clasrp  | 31.687   | 30.1058 | -0.0738486 | 0.62055  | 0.756275    | no  |
| Clcc1   | 17.8623  | 16.9633 | -0.0744984 | 0.7216   | 0.830945    | no  |
| Clcf1   | 37.5701  | 39.332  | 0.0661161  | 0.68755  | 0.807197    | no  |
| Clcn3   | 11.8475  | 13.0005 | 0.133984   | 0.36285  | 0.521093    | no  |
| Clcn4-2 | 31.6268  | 30.3427 | -0.0597972 | 0.66765  | 0.792601    | no  |
| Clcn5   | 1.38998  | 1.25289 | -0.149797  | 0.5243   | 0.675998    | no  |
| Clcn6   | 5.98184  | 5.28964 | -0.177419  | 0.32685  | 0.482247    | no  |
| Clcn7   | 11.4598  | 11.7392 | 0.0347559  | 0.81865  | 0.895331    | no  |
| Cldn12  | 1.04382  | 1.52856 | 0.550306   | 0.0262   | 0.0630025   | no  |
| Cldn25  | 31.5773  | 44.7502 | 0.503008   | 0.00085  | 0.00311418  | yes |
| Cldnd2  | 6.56783  | 3.93178 | -0.740234  | 0.03115  | 0.0728457   | no  |
| Clec12a | 0.177819 | 1.10086 | 2.63016    | 0.00085  | 0.00311418  | yes |
| Clec16a | 5.86831  | 5.48969 | -0.0962202 | 0.5368   | 0.686932    | no  |
| Clec2d  | 163.545  | 152.945 | -0.0966673 | 0.4966   | 0.651131    | no  |
| Clec2i  | 28.0962  | 31.9413 | 0.185048   | 0.2307   | 0.374147    | no  |
| Clec3b  | 1.92281  | 1.33353 | -0.527966  | 0.1893   | 0.322088    | no  |
| Clhc1   | 2.34536  | 1.23976 | -0.919751  | 0.01335  | 0.0351488   | yes |
| Clhc1   | 564.479  | 517.103 | -0.126467  | 0.3751   | 0.533809    | no  |
| Clhc3   | 1.64656  | 1.07677 | -0.612745  | 0.20455  | 0.341879    | no  |
| Clhc4   | 18.3289  | 15.1585 | -0.273997  | 0.06595  | 0.136953    | no  |
| Clint1  | 90.7388  | 103.4   | 0.188448   | 0.1893   | 0.322088    | no  |
| Clip1   | 17.3229  | 21.0856 | 0.28358    | 0.05045  | 0.109595    | no  |
| Clk1    | 114.081  | 120.928 | 0.0840825  | 0.567    | 0.712163    | no  |
| Clk2    | 47.3564  | 44.7759 | -0.0808367 | 0.5777   | 0.721175    | no  |
| Clk3    | 43.9013  | 37.3556 | -0.232942  | 0.10615  | 0.202944    | no  |
| Clk4    | 49.5     | 52.0517 | 0.0725178  | 0.61615  | 0.752889    | no  |
| Cln3    | 34.2629  | 28.3005 | -0.275824  | 0.05945  | 0.125933    | no  |
| Cln5    | 18.1615  | 16.4745 | -0.140649  | 0.3683   | 0.526883    | no  |
| Cln6    | 8.281    | 8.43111 | 0.0259182  | 0.88805  | 0.93722     | no  |
| Cln8    | 1.13689  | 1.11077 | -0.0335317 | 0.88     | 0.932727    | no  |
| Clns1a  | 19.0078  | 18.6028 | -0.0310733 | 0.83385  | 0.904707    | no  |
| Clock   | 4.86334  | 5.03633 | 0.0504247  | 0.7385   | 0.842803    | no  |
| Clp1    | 21.3898  | 19.7691 | -0.113679  | 0.4642   | 0.621275    | no  |
| Clpb    | 3.90664  | 3.95085 | 0.0162316  | 0.9263   | 0.959764    | no  |
| Clpp    | 15.301   | 15.5547 | 0.0237226  | 0.89215  | 0.939608    | no  |
| Clptm1  | 28.2529  | 26.7247 | -0.0802219 | 0.57705  | 0.720733    | no  |
| Clptm1l | 76.6855  | 76.0586 | -0.0118422 | 0.93275  | 0.963294    | no  |
| Clpx    | 15.0409  | 14.6328 | -0.0396779 | 0.7983   | 0.882634    | no  |
| Clspn   | 9.30091  | 5.2656  | -0.820772  | 5.00E-05 | 0.000236281 | yes |
| Clstn1  | 11.9163  | 14.9935 | 0.331404   | 0.0257   | 0.0619838   | no  |
| Clta    | 229.408  | 214.713 | -0.0955035 | 0.4986   | 0.652916    | no  |
| Cltb    | 8.73623  | 8.53278 | -0.0339944 | 0.8557   | 0.918195    | no  |
| Cltc    | 39.9571  | 35.707  | -0.162244  | 0.2534   | 0.3978      | no  |
| Cluap1  | 16.8352  | 16.9698 | 0.0114892  | 0.9478   | 0.971897    | no  |
| Cluh    | 9.25315  | 11.933  | 0.36694    | 0.01365  | 0.0358344   | yes |
| Clybl   | 7.06954  | 9.37534 | 0.407255   | 0.0511   | 0.110762    | no  |

|         |          |           |              |          |             |     |
|---------|----------|-----------|--------------|----------|-------------|-----|
| Cma1    | 1.98159  | 0.0656413 | -4.91591     | 0.13725  | 0.24936     | no  |
| Cmah    | 58.323   | 60.6292   | 0.055948     | 0.69495  | 0.812483    | no  |
| Cmas    | 58.6636  | 57.3733   | -0.0320861   | 0.8208   | 0.896737    | no  |
| Cmc1    | 36.6245  | 31.5152   | -0.216762    | 0.53385  | 0.684336    | no  |
| Cmc2    | 17.4515  | 13.9901   | -0.318943    | 0.0653   | 0.135827    | no  |
| Cmip    | 39.6016  | 42.8442   | 0.113539     | 0.41955  | 0.578068    | no  |
| Cmklr1  | 14.0698  | 7.17666   | -0.971223    | 5.00E-05 | 0.000236281 | yes |
| Cml1    | 4.18591  | 4.32222   | 0.0462295    | 0.86635  | 0.924646    | no  |
| Cmpk1   | 82.5121  | 67.0477   | -0.299417    | 0.0365   | 0.0832765   | no  |
| Cmpk2   | 3.30633  | 5.6324    | 0.768519     | 0.00015  | 0.000653255 | yes |
| Cmss1   | 3.3944   | 3.61892   | 0.0924035    | 0.84775  | 0.913147    | no  |
| Cmtm3   | 9.76104  | 10.1178   | 0.0517952    | 0.7732   | 0.866034    | no  |
| Cmtm4   | 1.54014  | 1.30767   | -0.236063    | 0.22465  | 0.367111    | no  |
| Cmtm6   | 49.0702  | 50.4055   | 0.0387361    | 0.7865   | 0.875057    | no  |
| Cmtm7   | 109.925  | 163.206   | 0.570173     | 0.00015  | 0.000653255 | yes |
| Cmtr1   | 45.7837  | 45.775    | -0.000273823 | 0.998    | 0.998396    | no  |
| Cmtr2   | 2.45172  | 2.22962   | -0.136996    | 0.51645  | 0.669238    | no  |
| Cnbd2   | 1.29217  | 1.42955   | 0.145759     | 0.8486   | 0.913632    | no  |
| Cnbp    | 174.381  | 177.188   | 0.0230387    | 0.8705   | 0.927099    | no  |
| Cndp2   | 47.6509  | 47.9572   | 0.00924373   | 0.94965  | 0.972875    | no  |
| Cnep1r1 | 15.7701  | 13.0614   | -0.271882    | 0.09815  | 0.190429    | no  |
| Cnga1   | 1.70112  | 2.25189   | 0.404651     | 0.1038   | 0.199282    | no  |
| Cnih1   | 45.4468  | 43.1388   | -0.075192    | 0.61755  | 0.754025    | no  |
| Cnih2   | 1.11583  | 1.01703   | -0.133752    | 0.8618   | 0.921907    | no  |
| Cnih4   | 6.04535  | 6.42906   | 0.0887831    | 0.6103   | 0.747929    | no  |
| Cnn2    | 643.145  | 615.283   | -0.0638926   | 0.6695   | 0.793996    | no  |
| Cnnm2   | 2.27037  | 1.84705   | -0.297707    | 0.1848   | 0.315847    | no  |
| Cnnm3   | 6.79329  | 7.13004   | 0.0697995    | 0.6564   | 0.784205    | no  |
| Cnnm4   | 4.1829   | 3.53337   | -0.243456    | 0.1713   | 0.297339    | no  |
| Cnot1   | 46.8062  | 47.1187   | 0.00960188   | 0.9488   | 0.972343    | no  |
| Cnot10  | 24.162   | 25.9786   | 0.104589     | 0.47255  | 0.62911     | no  |
| Cnot11  | 20.8559  | 19.6179   | -0.0882842   | 0.55205  | 0.699711    | no  |
| Cnot2   | 42.88    | 42.7781   | -0.00343083  | 0.98155  | 0.989458    | no  |
| Cnot3   | 46.6586  | 48.5166   | 0.0563361    | 0.71725  | 0.827787    | no  |
| Cnot4   | 12.8961  | 12.7383   | -0.0177632   | 0.9074   | 0.949014    | no  |
| Cnot6   | 31.5984  | 33.648    | 0.0906676    | 0.5296   | 0.68073     | no  |
| Cnot6l  | 32.0469  | 35.5552   | 0.149876     | 0.28605  | 0.436493    | no  |
| Cnot7   | 31.9285  | 34.2902   | 0.102951     | 0.5755   | 0.719421    | no  |
| Cnot8   | 43.0009  | 41.906    | -0.0372123   | 0.8042   | 0.886533    | no  |
| Cnp     | 112.659  | 118.904   | 0.0778284    | 0.5862   | 0.728359    | no  |
| Cnppd1  | 63.4789  | 63.7261   | 0.00560711   | 0.96855  | 0.982936    | no  |
| Cnpy2   | 28.3918  | 31.4685   | 0.148434     | 0.37275  | 0.531407    | no  |
| Cnpy3   | 22.3821  | 21.7596   | -0.0406946   | 0.7982   | 0.882551    | no  |
| Cnpy4   | 16.6335  | 15.6125   | -0.0913892   | 0.57545  | 0.719384    | no  |
| Cnr2    | 0.850728 | 1.55012   | 0.865609     | 0.00175  | 0.00592472  | yes |
| Cnrip1  | 3.25331  | 5.46079   | 0.7472       | 0.0024   | 0.00784462  | yes |
| Cnst    | 8.66915  | 8.82518   | 0.0257355    | 0.86845  | 0.926062    | no  |
| Cntf    | 2.49841  | 2.38418   | -0.0675162   | 0.9566   | 0.976752    | no  |
| Cntrob  | 11.7073  | 11.703    | -0.00053795  | 0.99765  | 0.998173    | no  |
| Coa3    | 68.6094  | 64.606    | -0.0867377   | 0.5819   | 0.724854    | no  |
| Coa4    | 16.5742  | 15.441    | -0.102173    | 0.6004   | 0.740127    | no  |
| Coa5    | 49.9817  | 46.2242   | -0.112753    | 0.42515  | 0.583551    | no  |
| Coa6    | 29.0256  | 25.9185   | -0.163341    | 0.3666   | 0.525015    | no  |
| Coa7    | 2.18612  | 1.907     | -0.197074    | 0.41265  | 0.571461    | no  |
| Coasy   | 10.6912  | 11.6566   | 0.124716     | 0.45625  | 0.613777    | no  |
| Cobll1  | 12.0316  | 11.5873   | -0.0542864   | 0.7189   | 0.828972    | no  |
| Cog1    | 23.0247  | 21.9944   | -0.0660468   | 0.7183   | 0.828605    | no  |



|          |          |         |             |         |           |     |
|----------|----------|---------|-------------|---------|-----------|-----|
| Cog2     | 21.218   | 21.485  | 0.0180389   | 0.9038  | 0.946947  | no  |
| Cog3     | 22.4988  | 22.0489 | -0.0291408  | 0.83745 | 0.906898  | no  |
| Cog4     | 18.4597  | 16.6921 | -0.145215   | 0.33765 | 0.493938  | no  |
| Cog5     | 16.8107  | 16.0241 | -0.069137   | 0.76795 | 0.862522  | no  |
| Cog6     | 14.1556  | 12.2044 | -0.213975   | 0.1708  | 0.296624  | no  |
| Cog7     | 4.91022  | 5.75502 | 0.229035    | 0.21255 | 0.35228   | no  |
| Cog8     | 29.4108  | 29.3533 | -0.00282159 | 0.9843  | 0.990884  | no  |
| Coil     | 6.78069  | 7.0525  | 0.0567024   | 0.74715 | 0.848667  | no  |
| Col11a2  | 2.38119  | 2.03448 | -0.227024   | 0.23015 | 0.373539  | no  |
| Col23a1  | 0.666031 | 1.09678 | 0.719607    | 0.0054  | 0.0160104 | yes |
| Col4a3bp | 30.4009  | 27.5352 | -0.142839   | 0.3089  | 0.462227  | no  |
| Colec12  | 2.86516  | 2.83128 | -0.0171624  | 0.9344  | 0.964391  | no  |
| Commd1   | 48.9159  | 45.2529 | -0.112293   | 0.5746  | 0.718576  | no  |
| Commd10  | 18.2869  | 18.1436 | -0.0113488  | 0.94425 | 0.969778  | no  |
| Commd2   | 13.7441  | 12.1398 | -0.179064   | 0.25355 | 0.397956  | no  |
| Commd3   | 69.3882  | 71.6106 | 0.0454821   | 0.7595  | 0.856972  | no  |
| Commd4   | 90.9217  | 87.8202 | -0.0500717  | 0.73695 | 0.841741  | no  |
| Commd5   | 19.0584  | 18.6658 | -0.0300334  | 0.8703  | 0.927054  | no  |
| Commd6   | 47.8051  | 45.1025 | -0.0839574  | 0.59485 | 0.735636  | no  |
| Commd7   | 22.4501  | 22.5172 | 0.00430599  | 0.97855 | 0.987999  | no  |
| Commd8   | 29.763   | 27.7291 | -0.10212    | 0.46835 | 0.624992  | no  |
| Commd9   | 12.2334  | 11.6728 | -0.0676724  | 0.721   | 0.83058   | no  |
| Comt     | 14.3546  | 15.2226 | 0.0847039   | 0.63955 | 0.771188  | no  |
| Comtd1   | 4.13548  | 4.5949  | 0.151977    | 0.81015 | 0.890172  | no  |
| Copa     | 102.81   | 99.3446 | -0.0494622  | 0.75135 | 0.851397  | no  |
| Copb1    | 62.4342  | 61.2835 | -0.0268363  | 0.8476  | 0.913029  | no  |
| Copb2    | 59.4527  | 59.796  | 0.00830825  | 0.95315 | 0.974933  | no  |
| Cope     | 117.687  | 117.538 | -0.00183817 | 0.9896  | 0.993761  | no  |
| Copg1    | 42.7368  | 41.7111 | -0.035049   | 0.81285 | 0.891792  | no  |
| Copg2    | 11.9468  | 10.4515 | -0.192915   | 0.2005  | 0.336713  | no  |
| Cops2    | 34.6921  | 30.4875 | -0.186391   | 0.19855 | 0.334305  | no  |
| Cops3    | 30.6431  | 27.6021 | -0.150781   | 0.33875 | 0.495137  | no  |
| Cops4    | 34.5727  | 29.6382 | -0.222178   | 0.14505 | 0.26005   | no  |
| Cops5    | 38.7573  | 36.1281 | -0.101346   | 0.49615 | 0.650722  | no  |
| Cops6    | 72.4006  | 69.8256 | -0.0522447  | 0.7232  | 0.832014  | no  |
| Cops7a   | 18.7171  | 17.9706 | -0.0587209  | 0.7218  | 0.83104   | no  |
| Cops7b   | 9.33833  | 8.78848 | -0.0875517  | 0.6134  | 0.750568  | no  |
| Cops8    | 36.6204  | 34.2017 | -0.0985825  | 0.5105  | 0.66377   | no  |
| Copz1    | 100.685  | 101.444 | 0.0108309   | 0.93685 | 0.965734  | no  |
| Coq10a   | 6.66913  | 6.8145  | 0.0311079   | 0.86275 | 0.92238   | no  |
| Coq10b   | 16.265   | 14.5944 | -0.15635    | 0.34285 | 0.499629  | no  |
| Coq2     | 16.8447  | 19.7224 | 0.227537    | 0.16    | 0.281617  | no  |
| Coq3     | 2.64984  | 2.48964 | -0.0899686  | 0.6907  | 0.809521  | no  |
| Coq4     | 2.01357  | 2.51868 | 0.322915    | 0.2139  | 0.353994  | no  |
| Coq5     | 10.4291  | 10.9756 | 0.0736864   | 0.66935 | 0.793924  | no  |
| Coq6     | 10.146   | 10.5114 | 0.0510499   | 0.78075 | 0.871049  | no  |
| Coq7     | 6.44712  | 5.85042 | -0.140114   | 0.59045 | 0.731926  | no  |
| Coq9     | 22.8415  | 22.9667 | 0.00788904  | 0.9582  | 0.977478  | no  |
| Coro1a   | 1675.15  | 1554.92 | -0.107453   | 0.5261  | 0.677502  | no  |
| Coro1b   | 198.567  | 182.953 | -0.118151   | 0.4004  | 0.559392  | no  |
| Coro1c   | 35.448   | 30.3943 | -0.221907   | 0.1205  | 0.22498   | no  |
| Coro2a   | 10.999   | 13.3774 | 0.282426    | 0.06155 | 0.129538  | no  |
| Coro7    | 77.416   | 87.6882 | 0.179751    | 0.22275 | 0.364597  | no  |
| Cotl1    | 576.828  | 572.678 | -0.0104177  | 0.942   | 0.968581  | no  |
| Cox10    | 9.42463  | 10.9616 | 0.217949    | 0.1872  | 0.319223  | no  |
| Cox11    | 6.00888  | 6.98074 | 0.216283    | 0.2467  | 0.391884  | no  |
| Cox14    | 45.1362  | 52.4232 | 0.21592     | 0.19685 | 0.332044  | no  |

|         |         |          |             |          |             |     |
|---------|---------|----------|-------------|----------|-------------|-----|
| Cox15   | 8.53344 | 8.68331  | 0.0251174   | 0.8754   | 0.930114    | no  |
| Cox16   | 19.7749 | 19.25    | -0.0388108  | 0.80555  | 0.887217    | no  |
| Cox17   | 275.948 | 264.504  | -0.0611085  | 0.6869   | 0.806742    | no  |
| Cox18   | 13.4519 | 13.5996  | 0.0157545   | 0.93095  | 0.96228     | no  |
| Cox19   | 24.2245 | 21.6032  | -0.165222   | 0.3736   | 0.532275    | no  |
| Cox20   | 171.439 | 168.138  | -0.0280457  | 0.8565   | 0.91869     | no  |
| Cox4i1  | 602.597 | 568.534  | -0.0839454  | 0.5553   | 0.702417    | no  |
| Cox5a   | 305.999 | 286.415  | -0.095421   | 0.5029   | 0.657036    | no  |
| Cox5b   | 394.177 | 341.782  | -0.205766   | 0.14825  | 0.264658    | no  |
| Cox6a1  | 443.706 | 417.847  | -0.0866298  | 0.5399   | 0.689474    | no  |
| Cox6b1  | 551.261 | 497.651  | -0.147602   | 0.29115  | 0.442096    | no  |
| Cox6b2  | 1.22592 | 1.63566  | 0.416015    | 0.47065  | 0.62716     | no  |
| Cox6c   | 391.53  | 370.408  | -0.0800082  | 0.57385  | 0.717969    | no  |
| Cox7a1  | 2.12699 | 2.12458  | -0.00163073 | 0.92685  | 0.960151    | no  |
| Cox7a2  | 143.026 | 124.779  | -0.196904   | 0.1725   | 0.298951    | no  |
| Cox7a2l | 443.172 | 426.983  | -0.0536896  | 0.70025  | 0.816057    | no  |
| Cox7b   | 126.745 | 124.154  | -0.0298022  | 0.83345  | 0.90444     | no  |
| Cox7c   | 210.814 | 196.437  | -0.101902   | 0.50315  | 0.657277    | no  |
| Cox8a   | 548.849 | 490.098  | -0.16334    | 0.2526   | 0.396897    | no  |
| Cpeb2   | 3.4856  | 3.14215  | -0.149654   | 0.3731   | 0.531756    | no  |
| Cpeb4   | 10.0073 | 9.54887  | -0.0676464  | 0.636    | 0.768391    | no  |
| Cpm     | 7.55552 | 11.5788  | 0.615881    | 5.00E-05 | 0.000236281 | yes |
| Cpne1   | 64.9791 | 60.2381  | -0.1093     | 0.48125  | 0.636932    | no  |
| Cpne2   | 2.57721 | 2.83409  | 0.137073    | 0.56065  | 0.706942    | no  |
| Cpne3   | 12.9855 | 14.2154  | 0.130555    | 0.3674   | 0.525862    | no  |
| Cpne7   | 1.03617 | 0.705364 | -0.55482    | 0.10765  | 0.205378    | no  |
| Cpne8   | 23.6881 | 10.8012  | -1.13296    | 5.00E-05 | 0.000236281 | yes |
| Cpox    | 14.7155 | 17.2528  | 0.229494    | 0.13255  | 0.242815    | no  |
| Cpped1  | 5.20927 | 4.23212  | -0.299702   | 0.1243   | 0.230598    | no  |
| Cpsf1   | 28.2112 | 28.7979  | 0.0297001   | 0.83865  | 0.9075      | no  |
| Cpsf2   | 19.8821 | 18.9169  | -0.071796   | 0.61575  | 0.752582    | no  |
| Cpsf3   | 41.473  | 44.882   | 0.113965    | 0.42815  | 0.586437    | no  |
| Cpsf3l  | 31.3274 | 32.1982  | 0.0395514   | 0.8029   | 0.885625    | no  |
| Cpsf4   | 28.6192 | 27.1369  | -0.076727   | 0.6144   | 0.751479    | no  |
| Cpsf6   | 15.7561 | 14.8388  | -0.0865307  | 0.55205  | 0.699711    | no  |
| Cpsf7   | 42.9212 | 40.3308  | -0.0898076  | 0.5292   | 0.680352    | no  |
| Cpt1a   | 22.5256 | 22.7176  | 0.0122432   | 0.9306   | 0.962073    | no  |
| Cpt1b   | 1.24815 | 0.720974 | -0.791776   | 0.4972   | 0.651651    | no  |
| Cpt2    | 6.54654 | 5.50809  | -0.249182   | 0.18255  | 0.312835    | no  |
| Cr1l    | 87.8776 | 89.5283  | 0.0268489   | 0.85225  | 0.915997    | no  |
| Cradd   | 8.08974 | 7.57826  | -0.0942258  | 0.6237   | 0.758764    | no  |
| Cramp1l | 13.356  | 13.3614  | 0.000586188 | 0.996    | 0.997158    | no  |
| Crat    | 1.60508 | 1.83196  | 0.190747    | 0.5608   | 0.707093    | no  |
| Crbn    | 27.1136 | 25.1661  | -0.107536   | 0.5271   | 0.678406    | no  |
| Crcp    | 36.2349 | 35.0425  | -0.0482741  | 0.75235  | 0.851996    | no  |
| Creb1   | 23.3578 | 21.2233  | -0.138259   | 0.3328   | 0.488534    | no  |
| Creb3   | 25.8165 | 26.2487  | 0.0239529   | 0.94455  | 0.969931    | no  |
| Creb3l1 | 2.32183 | 1.94505  | -0.255457   | 0.31335  | 0.467083    | no  |
| Creb3l2 | 1.57478 | 1.73436  | 0.139251    | 0.5711   | 0.715644    | no  |
| Crebbp  | 13.9108 | 14.8658  | 0.0957935   | 0.4959   | 0.650539    | no  |
| Crebl2  | 5.65057 | 5.3195   | -0.0871053  | 0.63665  | 0.768926    | no  |
| Crebrf  | 9.6052  | 8.29298  | -0.211926   | 0.1506   | 0.268107    | no  |
| Crebzf  | 22.1228 | 20.5609  | -0.105629   | 0.5048   | 0.658859    | no  |
| Creg1   | 6.57134 | 8.02317  | 0.287985    | 0.11885  | 0.222523    | no  |
| Creld1  | 2.58335 | 3.09904  | 0.262575    | 0.28325  | 0.433326    | no  |
| Creld2  | 29.5411 | 28.9344  | -0.0299366  | 0.852    | 0.915812    | no  |
| Creml   | 4.52534 | 3.95482  | -0.194415   | 0.37365  | 0.532335    | no  |

|            |          |         |             |         |           |     |
|------------|----------|---------|-------------|---------|-----------|-----|
| Crim1      | 7.29448  | 8.24102 | 0.176017    | 0.31705 | 0.471176  | no  |
| Crip1      | 1704.48  | 1749.29 | 0.037438    | 0.7941  | 0.879976  | no  |
| Crip2      | 6.5222   | 7.18901 | 0.140434    | 0.50025 | 0.654458  | no  |
| Cript      | 53.6698  | 42.7347 | -0.328703   | 0.03315 | 0.0767624 | no  |
| Crk        | 11.4685  | 10.9747 | -0.063493   | 0.6642  | 0.78994   | no  |
| Crkl       | 31.0116  | 28.5153 | -0.121073   | 0.39595 | 0.554976  | no  |
| Crif2      | 33.5317  | 32.2322 | -0.0570209  | 0.712   | 0.824342  | no  |
| Crif3      | 86.5236  | 97.0675 | 0.165894    | 0.24005 | 0.385195  | no  |
| Crls1      | 9.51663  | 8.6477  | -0.138134   | 0.44715 | 0.604612  | no  |
| Crmp1      | 15.8637  | 12.2111 | -0.377538   | 0.01515 | 0.0391806 | yes |
| Crnk1      | 25.0169  | 25.0529 | 0.00207247  | 0.98875 | 0.993395  | no  |
| Crocc      | 2.15895  | 1.83263 | -0.236408   | 0.20825 | 0.3467    | no  |
| Crot       | 51.3928  | 45.862  | -0.164266   | 0.24875 | 0.39412   | no  |
| Crtam      | 43.2391  | 36.2096 | -0.255964   | 0.08245 | 0.164741  | no  |
| Crtap      | 6.97205  | 7.298   | 0.065917    | 0.7351  | 0.84039   | no  |
| Crtc1      | 4.21907  | 5.05883 | 0.261877    | 0.11205 | 0.212064  | no  |
| Crtc2      | 33.7871  | 35.5964 | 0.0752559   | 0.60385 | 0.742771  | no  |
| Crtc3      | 12.6084  | 14.2498 | 0.176559    | 0.22855 | 0.371634  | no  |
| Cry1       | 21.5757  | 21.7233 | 0.00983822  | 0.9431  | 0.96919   | no  |
| Cry2       | 2.62233  | 2.70362 | 0.0440451   | 0.81895 | 0.895575  | no  |
| Cryba4     | 3.36641  | 4.91363 | 0.545579    | 0.0955  | 0.186116  | no  |
| Crybb1     | 8.02748  | 9.75636 | 0.281396    | 0.2361  | 0.380562  | no  |
| Crybg3     | 12.5907  | 12.2949 | -0.034296   | 0.8762  | 0.930614  | no  |
| Cryl1      | 3.82039  | 3.73355 | -0.0331686  | 0.8963  | 0.94239   | no  |
| Cryz       | 0.934702 | 1.49524 | 0.677795    | 0.0595  | 0.126028  | no  |
| Cryz1      | 9.35191  | 11.1895 | 0.258807    | 0.15275 | 0.27123   | no  |
| Cs         | 101.525  | 92.9503 | -0.127302   | 0.37175 | 0.530303  | no  |
| Csad       | 2.5054   | 2.12771 | -0.235741   | 0.3456  | 0.502589  | no  |
| Csde1      | 80.9113  | 71.8031 | -0.172296   | 0.21335 | 0.353307  | no  |
| Cse1l      | 24.1516  | 22.5333 | -0.100059   | 0.49545 | 0.650118  | no  |
| Csf2ra     | 1.46145  | 2.02301 | 0.469108    | 0.1133  | 0.213976  | no  |
| Csgalnact2 | 13.0237  | 10.7646 | -0.274851   | 0.07165 | 0.146654  | no  |
| Csk        | 204.389  | 194.2   | -0.0737751  | 0.60445 | 0.743289  | no  |
| Csnk1a1    | 119.146  | 131.439 | 0.141654    | 0.31135 | 0.464976  | no  |
| Csnk1d     | 61.4221  | 61.2178 | -0.00480746 | 0.97275 | 0.985017  | no  |
| Csnk1e     | 8.76374  | 9.93264 | 0.180631    | 0.2829  | 0.432894  | no  |
| Csnk1g1    | 9.4797   | 9.59831 | 0.0179385   | 0.90415 | 0.947103  | no  |
| Csnk1g2    | 92.5434  | 92.6885 | 0.00226052  | 0.98495 | 0.991326  | no  |
| Csnk1g3    | 10.7767  | 10.9375 | 0.0213749   | 0.8921  | 0.939598  | no  |
| Csnk2a1    | 56.24    | 55.3157 | -0.023908   | 0.86105 | 0.92154   | no  |
| Csnk2a2    | 14.715   | 13.6201 | -0.111547   | 0.4634  | 0.620475  | no  |
| Csnk2b     | 167.028  | 159.634 | -0.0653255  | 0.64705 | 0.777085  | no  |
| Cspp1      | 7.77637  | 7.08765 | -0.13379    | 0.41015 | 0.569104  | no  |
| Csrnp1     | 25.0303  | 28.1595 | 0.169946    | 0.2447  | 0.389804  | no  |
| Csrnp2     | 1.69133  | 1.32598 | -0.351102   | 0.12925 | 0.237899  | no  |
| Csrp1      | 45.9636  | 34.4476 | -0.416088   | 0.00565 | 0.0166536 | yes |
| Csrp2      | 3.33054  | 2.92547 | -0.187087   | 0.56065 | 0.706942  | no  |
| Csrp2bp    | 13.3616  | 12.8642 | -0.0547332  | 0.7276  | 0.834994  | no  |
| Cst3       | 110.51   | 113.451 | 0.0378888   | 0.8023  | 0.885171  | no  |
| Cst7       | 221.846  | 226.134 | 0.0276216   | 0.8478  | 0.913147  | no  |
| Cstb       | 72.6435  | 68.5138 | -0.0844402  | 0.60575 | 0.744356  | no  |
| Cstf1      | 19.4325  | 20.4804 | 0.0757713   | 0.6287  | 0.762573  | no  |
| Cstf2      | 19.2607  | 18.399  | -0.066032   | 0.6743  | 0.797451  | no  |
| Cstf2t     | 12.5738  | 13.919  | 0.146646    | 0.33175 | 0.487449  | no  |
| Cstf3      | 23.0056  | 20.3158 | -0.179385   | 0.3048  | 0.457634  | no  |
| Ctage5     | 41.9215  | 45.2867 | 0.111397    | 0.43145 | 0.589664  | no  |
| Cthp1      | 101.109  | 95.2713 | -0.0857936  | 0.54725 | 0.695613  | no  |

|          |         |         |             |          |             |     |
|----------|---------|---------|-------------|----------|-------------|-----|
| Ctbs     | 2.49209 | 2.71531 | 0.123762    | 0.6633   | 0.789402    | no  |
| Ctc1     | 4.80439 | 4.27676 | -0.167836   | 0.3383   | 0.494653    | no  |
| Ctcf     | 64.7081 | 60.3355 | -0.100938   | 0.47465  | 0.631073    | no  |
| Ctdnep1  | 68.6542 | 68.9354 | 0.00589666  | 0.97075  | 0.984008    | no  |
| Ctdp1    | 22.6198 | 21.6232 | -0.0650018  | 0.65635  | 0.784158    | no  |
| Ctdsp1   | 85.5271 | 78.1295 | -0.130514   | 0.3551   | 0.512728    | no  |
| Ctdsp2   | 22.0027 | 38.7004 | 0.814665    | 5.00E-05 | 0.000236281 | yes |
| Ctdspl2  | 8.47537 | 7.79485 | -0.120754   | 0.4271   | 0.585533    | no  |
| Ctla2a   | 320.118 | 344.029 | 0.103929    | 0.4601   | 0.617344    | no  |
| Ctla2b   | 105.661 | 112.361 | 0.0886965   | 0.5522   | 0.699863    | no  |
| Ctla4    | 13.2905 | 28.3497 | 1.09294     | 5.00E-05 | 0.000236281 | yes |
| Ctnna1   | 14.5625 | 11.9254 | -0.288212   | 0.05995  | 0.126859    | no  |
| Ctnnb1   | 66.1421 | 56.1205 | -0.23704    | 0.0966   | 0.187939    | no  |
| Ctnnbip1 | 5.95641 | 4.38461 | -0.441993   | 0.02075  | 0.0515134   | no  |
| Ctnnb1   | 24.9952 | 24.8981 | -0.00562089 | 0.9686   | 0.982972    | no  |
| Ctns     | 5.17279 | 4.56615 | -0.179967   | 0.32955  | 0.485176    | no  |
| Ctps     | 8.38617 | 8.87303 | 0.0814151   | 0.6313   | 0.764846    | no  |
| Ctps2    | 17.0935 | 17.9562 | 0.0710399   | 0.62425  | 0.759185    | no  |
| Ctrl     | 16.8362 | 17.1714 | 0.0284413   | 0.848    | 0.913251    | no  |
| Ctrl     | 1.66319 | 1.27076 | -0.388264   | 0.37835  | 0.537329    | no  |
| Ctsa     | 128.123 | 121.691 | -0.0742984  | 0.6113   | 0.748686    | no  |
| Ctsb     | 50.2781 | 47.8686 | -0.0708511  | 0.63605  | 0.768438    | no  |
| Ctsc     | 59.292  | 47.0802 | -0.332717   | 0.01895  | 0.0475701   | yes |
| Ctsd     | 988.541 | 771.277 | -0.358052   | 0.02345  | 0.0572656   | no  |
| Ctse     | 9.24265 | 10.5255 | 0.187515    | 0.28105  | 0.430857    | no  |
| Ctso     | 12.1267 | 11.1296 | -0.123777   | 0.4241   | 0.582438    | no  |
| Ctss     | 62.9726 | 68.3908 | 0.119079    | 0.4188   | 0.57744     | no  |
| Ctsw     | 509.76  | 552.731 | 0.116758    | 0.4177   | 0.576306    | no  |
| Ctsz     | 27.4994 | 39.3018 | 0.515192    | 0.02185  | 0.0538879   | no  |
| Ctu1     | 5.96757 | 5.77201 | -0.04807    | 0.79265  | 0.879004    | no  |
| Ctu2     | 12.9112 | 13.931  | 0.109677    | 0.7751   | 0.867419    | no  |
| Ctxn1    | 2.81085 | 2.43499 | -0.207088   | 0.4905   | 0.645459    | no  |
| Cuedc1   | 1.88496 | 1.93776 | 0.0398601   | 0.94215  | 0.968641    | no  |
| Cuedc2   | 22.1046 | 23.1382 | 0.065927    | 0.67965  | 0.801495    | no  |
| Cul1     | 33.1013 | 32.2381 | -0.0381184  | 0.79135  | 0.87828     | no  |
| Cul2     | 8.42059 | 7.84954 | -0.101313   | 0.5175   | 0.670021    | no  |
| Cul3     | 84.7741 | 82.9153 | -0.0319845  | 0.8201   | 0.896347    | no  |
| Cul4a    | 17.3768 | 17.4749 | 0.00811927  | 0.95755  | 0.977134    | no  |
| Cul4b    | 14.4533 | 12.8197 | -0.173031   | 0.2441   | 0.389085    | no  |
| Cul5     | 8.30513 | 8.25387 | -0.0089323  | 0.9558   | 0.976356    | no  |
| Cul7     | 1.2554  | 1.09459 | -0.197756   | 0.38365  | 0.542705    | no  |
| Cul9     | 1.07026 | 1.25668 | 0.231653    | 0.25775  | 0.403015    | no  |
| Cuta     | 115.719 | 110.813 | -0.0624997  | 0.68135  | 0.802748    | no  |
| Cutc     | 12.0799 | 12.1699 | 0.0107071   | 0.95535  | 0.976122    | no  |
| Cux1     | 10.7694 | 12.0066 | 0.156892    | 0.37855  | 0.537559    | no  |
| Cwc15    | 151.296 | 148.076 | -0.0310305  | 0.8246   | 0.899066    | no  |
| Cwc22    | 18.2945 | 17.8008 | -0.039466   | 0.795    | 0.880586    | no  |
| Cwc25    | 10.7589 | 11.6795 | 0.11845     | 0.4453   | 0.602988    | no  |
| Cwc27    | 7.9883  | 8.21887 | 0.0410515   | 0.81715  | 0.894522    | no  |
| Cwf19l1  | 5.66588 | 5.06785 | -0.160925   | 0.36215  | 0.520374    | no  |
| Cwf19l2  | 6.15429 | 6.35647 | 0.0466344   | 0.7807   | 0.871048    | no  |
| Cx3cr1   | 138.188 | 48.0045 | -1.52539    | 5.00E-05 | 0.000236281 | yes |
| Cxcl10   | 3.49485 | 3.57806 | 0.0339508   | 0.907    | 0.948831    | no  |
| Cxcr3    | 164.468 | 203.151 | 0.304747    | 0.03335  | 0.0771723   | no  |
| Cxcr4    | 6.02277 | 7.9393  | 0.398586    | 0.0431   | 0.0959497   | no  |
| Cxcr6    | 216.051 | 237.066 | 0.133913    | 0.4316   | 0.589846    | no  |
| Cxx1a    | 2.12926 | 2.27112 | 0.0930498   | 0.77275  | 0.865736    | no  |

|               |          |           |            |          |             |     |
|---------------|----------|-----------|------------|----------|-------------|-----|
| Cxx1b         | 5.05449  | 4.34152   | -0.219366  | 0.37735  | 0.536232    | no  |
| Cxx1c         | 3.27664  | 3.49802   | 0.0943206  | 0.76     | 0.857221    | no  |
| Cxxc1         | 64.8073  | 63.686    | -0.0251817 | 0.85875  | 0.920092    | no  |
| Cyb5          | 99.1005  | 111.032   | 0.164007   | 0.26685  | 0.414134    | no  |
| Cyb561        | 0.680404 | 1.17714   | 0.790826   | 0.0236   | 0.0575801   | no  |
| Cyb561a3      | 21.2362  | 18.4195   | -0.205294  | 0.1666   | 0.290999    | no  |
| Cyb561d1      | 14.3594  | 14.5586   | 0.0198815  | 0.89295  | 0.9401      | no  |
| Cyb561d2      | 16.3256  | 14.8679   | -0.134942  | 0.41375  | 0.572591    | no  |
| Cyb5b         | 27.962   | 26.0556   | -0.101875  | 0.47435  | 0.630792    | no  |
| Cyb5d1        | 12.6466  | 12.9789   | 0.0374251  | 0.8674   | 0.925375    | no  |
| Cyb5d2        | 2.28752  | 2.09746   | -0.125143  | 0.61075  | 0.748259    | no  |
| Cyb5r1        | 12.0852  | 10.5948   | -0.189883  | 0.2886   | 0.43932     | no  |
| Cyb5r3        | 17.5799  | 16.9412   | -0.0533906 | 0.7377   | 0.842257    | no  |
| Cyb5r4        | 62.2748  | 67.1263   | 0.108231   | 0.4454   | 0.603054    | no  |
| Cyb5rl        | 2.19089  | 2.94914   | 0.428779   | 0.11525  | 0.217032    | no  |
| Cyba          | 653.106  | 578.927   | -0.173935  | 0.2196   | 0.360746    | no  |
| Cyc1          | 84.9243  | 87.7859   | 0.0478118  | 0.73815  | 0.84258     | no  |
| Cyccs         | 29.9035  | 29.3323   | -0.0278263 | 0.84335  | 0.910563    | no  |
| Cyfip1        | 5.37047  | 5.69876   | 0.0855972  | 0.71275  | 0.824832    | no  |
| Cyfip2        | 101.408  | 105.287   | 0.0541646  | 0.7088   | 0.822175    | no  |
| Cyhr1         | 39.2528  | 39.4375   | 0.00677289 | 0.96975  | 0.983653    | no  |
| Cyld          | 25.6798  | 24.264    | -0.0818132 | 0.5605   | 0.706804    | no  |
| Cyp17a1       | 1.01143  | 0.0851652 | -3.56999   | 0.012    | 0.0320694   | yes |
| Cyp20a1       | 6.43488  | 6.25313   | -0.0413363 | 0.8426   | 0.9101      | no  |
| Cyp2s1        | 1.48409  | 3.5305    | 1.25029    | 5.00E-05 | 0.000236281 | yes |
| Cyp4f13       | 5.0743   | 4.84428   | -0.0669253 | 0.758    | 0.855758    | no  |
| Cyp4f17       | 1.81145  | 1.71986   | -0.074849  | 0.80585  | 0.887396    | no  |
| Cyp4v3        | 5.48317  | 6.88948   | 0.329387   | 0.06545  | 0.136078    | no  |
| Cyp51         | 6.77796  | 6.82192   | 0.0093275  | 0.95515  | 0.976045    | no  |
| Cysltr2       | 8.47149  | 6.50213   | -0.381702  | 0.04795  | 0.104956    | no  |
| Cyth1         | 72.0804  | 74.2968   | 0.0436936  | 0.7525   | 0.852029    | no  |
| Cyth2         | 25.7777  | 26.3666   | 0.0325899  | 0.82325  | 0.898232    | no  |
| Cyth3         | 1.24025  | 1.5961    | 0.36392    | 0.13685  | 0.249011    | no  |
| Cyth4         | 190.413  | 171.811   | -0.148312  | 0.30485  | 0.457671    | no  |
| Cytip         | 78.2887  | 75.7395   | -0.0477593 | 0.738    | 0.842491    | no  |
| D030056L22Rik | 11.9746  | 12.3849   | 0.0486055  | 0.77775  | 0.869172    | no  |
| D10Jhu81e     | 42.168   | 48.6035   | 0.204911   | 0.1737   | 0.300588    | no  |
| D10Wsu102e    | 22.2089  | 22.6317   | 0.0272079  | 0.8531   | 0.916547    | no  |
| D11Wsu47e     | 7.52439  | 6.9017    | -0.124621  | 0.48565  | 0.640929    | no  |
| D130040H23Rik | 1.93235  | 1.63638   | -0.239853  | 0.3915   | 0.550576    | no  |
| D15Ertd621e   | 14.6611  | 14.9009   | 0.0234091  | 0.8679   | 0.925713    | no  |
| D16Ertd472e   | 26.8195  | 22.3457   | -0.263288  | 0.0663   | 0.137425    | no  |
| D17H6S53E     | 6.41298  | 5.88107   | -0.124916  | 0.5082   | 0.661816    | no  |
| D17Wsu104e    | 54.2343  | 51.7659   | -0.0672049 | 0.6632   | 0.789362    | no  |
| D17Wsu92e     | 44.1904  | 51.821    | 0.229806   | 0.1066   | 0.203677    | no  |
| D19Bwg1357e   | 20.0216  | 21.8126   | 0.1236     | 0.39845  | 0.557462    | no  |
| D1Ertd622e    | 27.401   | 21.742    | -0.333747  | 0.02635  | 0.0633006   | no  |
| D230025D16Rik | 9.89622  | 9.69065   | -0.0302838 | 0.86665  | 0.924869    | no  |
| D2hgdh        | 14.0298  | 14.7254   | 0.0698134  | 0.64825  | 0.777971    | no  |
| D2Wsu81e      | 14.7847  | 16.3725   | 0.147168   | 0.39315  | 0.552313    | no  |
| D3Ertd751e    | 3.08629  | 3.01058   | -0.0358316 | 0.88615  | 0.936237    | no  |
| D430042O09Rik | 4.58608  | 4.65451   | 0.0213672  | 0.89505  | 0.941426    | no  |
| D5Ertd579e    | 6.31162  | 6.46894   | 0.0355198  | 0.8144   | 0.892563    | no  |
| D6Wsu163e     | 8.5945   | 8.3504    | -0.0415676 | 0.81035  | 0.890267    | no  |
| D8Ertd738e    | 174.406  | 170.628   | -0.0315963 | 0.8301   | 0.902483    | no  |
| D8Ertd82e     | 26.0174  | 19.8886   | -0.387533  | 0.00785  | 0.0221974   | yes |
| D930015E06Rik | 37.7324  | 32.3654   | -0.22135   | 0.11615  | 0.218406    | no  |

|         |         |         |             |          |             |     |
|---------|---------|---------|-------------|----------|-------------|-----|
| Daam1   | 1.61498 | 2.13352 | 0.401718    | 0.03955  | 0.0891973   | no  |
| Dad1    | 224.751 | 221.066 | -0.0238516  | 0.86865  | 0.926163    | no  |
| Dag1    | 1.66969 | 1.95965 | 0.231009    | 0.2505   | 0.396111    | no  |
| Daglb   | 3.87275 | 4.55573 | 0.234324    | 0.20775  | 0.346088    | no  |
| Dak     | 7.8192  | 8.44722 | 0.111455    | 0.5322   | 0.682766    | no  |
| Dalrd3  | 31.4336 | 35.1695 | 0.162016    | 0.4138   | 0.572616    | no  |
| Dand5   | 7.49107 | 6.36195 | -0.235701   | 0.2695   | 0.417265    | no  |
| Dap     | 121.25  | 120.092 | -0.0138455  | 0.92255  | 0.957904    | no  |
| Dap3    | 15.5554 | 17.4781 | 0.16813     | 0.24785  | 0.3931      | no  |
| Dapk2   | 44.2756 | 18.6695 | -1.24582    | 5.00E-05 | 0.000236281 | yes |
| Dapk3   | 33.4116 | 32.1297 | -0.0564404  | 0.7097   | 0.822759    | no  |
| Dapl1   | 21.0423 | 20.8338 | -0.0143664  | 0.94965  | 0.972875    | no  |
| Dapp1   | 22.9515 | 22.6935 | -0.0163056  | 0.9153   | 0.953532    | no  |
| Dars    | 46.028  | 46.9872 | 0.0297563   | 0.84055  | 0.908805    | no  |
| Dars2   | 6.71072 | 6.35556 | -0.0784479  | 0.6421   | 0.773219    | no  |
| Daxx    | 40.5974 | 38.812  | -0.064883   | 0.65285  | 0.781683    | no  |
| Dazap1  | 61.3768 | 61.976  | 0.0140176   | 0.9222   | 0.957808    | no  |
| Dazap2  | 330.194 | 310.164 | -0.0902836  | 0.5272   | 0.678497    | no  |
| Dbf4    | 31.6904 | 26.0837 | -0.280894   | 0.0568   | 0.121163    | no  |
| Dbi     | 110.884 | 89.2425 | -0.313251   | 0.0435   | 0.0966968   | no  |
| Dbndd2  | 2.04367 | 2.24324 | 0.134422    | 0.5317   | 0.68241     | no  |
| Dbnl    | 103.798 | 102.844 | -0.0133281  | 0.92765  | 0.960543    | no  |
| Dbp     | 3.24319 | 3.40674 | 0.0709772   | 0.8938   | 0.940644    | no  |
| Dbr1    | 17.0916 | 16.1594 | -0.0809075  | 0.61275  | 0.749954    | no  |
| Dbt     | 8.33579 | 9.35934 | 0.167089    | 0.3088   | 0.462126    | no  |
| Dcaf10  | 7.51021 | 6.97162 | -0.10736    | 0.47555  | 0.631793    | no  |
| Dcaf11  | 32.6288 | 32.8319 | 0.00895124  | 0.9526   | 0.974596    | no  |
| Dcaf12  | 25.4947 | 25.6604 | 0.00934573  | 0.94825  | 0.972161    | no  |
| Dcaf13  | 42.5215 | 41.5225 | -0.0342982  | 0.8199   | 0.896253    | no  |
| Dcaf15  | 46.2986 | 49.7247 | 0.102997    | 0.47265  | 0.62916     | no  |
| Dcaf17  | 8.27497 | 9.35158 | 0.176457    | 0.3824   | 0.541501    | no  |
| Dcaf4   | 10.2944 | 10.5214 | 0.0314725   | 0.856    | 0.918377    | no  |
| Dcaf5   | 23.5929 | 24.0918 | 0.0301871   | 0.8294   | 0.902042    | no  |
| Dcaf6   | 6.82353 | 7.77069 | 0.187524    | 0.2604   | 0.406187    | no  |
| Dcaf7   | 35.3979 | 35.1208 | -0.0113382  | 0.93545  | 0.964911    | no  |
| Dcaf8   | 36.2606 | 38.2951 | 0.0787599   | 0.56765  | 0.712662    | no  |
| Dcakd   | 7.07268 | 7.23432 | 0.0326018   | 0.8653   | 0.924071    | no  |
| Dcdc2c  | 8.07037 | 7.44013 | -0.117307   | 0.55395  | 0.701363    | no  |
| Dck     | 30.7995 | 30.2679 | -0.0251214  | 0.8627   | 0.92238     | no  |
| Dclk2   | 2.37833 | 1.98926 | -0.257717   | 0.21955  | 0.360689    | no  |
| Dclre1a | 3.77358 | 3.74908 | -0.00939946 | 0.9567   | 0.976752    | no  |
| Dclre1b | 4.05115 | 4.63918 | 0.195538    | 0.2733   | 0.421724    | no  |
| Dclre1c | 10.2135 | 9.35634 | -0.126462   | 0.4353   | 0.593375    | no  |
| Dcp1a   | 13.8645 | 13.8805 | 0.00165803  | 0.9907   | 0.994335    | no  |
| Dcp1b   | 14.577  | 12.1154 | -0.26685    | 0.07775  | 0.156865    | no  |
| Dcp2    | 7.35087 | 8.21373 | 0.160124    | 0.27225  | 0.420434    | no  |
| Dcps    | 69.8356 | 63.9484 | -0.127054   | 0.5742   | 0.718254    | no  |
| Dctd    | 1.06462 | 1.03414 | -0.0419128  | 0.9005   | 0.94492     | no  |
| Dctn1   | 41.8203 | 42.27   | 0.0154295   | 0.91425  | 0.953001    | no  |
| Dctn2   | 66.9    | 70.3175 | 0.0718778   | 0.7162   | 0.827278    | no  |
| Dctn3   | 71.2345 | 63.8783 | -0.157249   | 0.29995  | 0.452277    | no  |
| Dctn4   | 18.5334 | 16.8321 | -0.138911   | 0.3508   | 0.508161    | no  |
| Dctn5   | 85.1591 | 79.6372 | -0.0967192  | 0.4942   | 0.648864    | no  |
| Dctn6   | 73.1559 | 71.1916 | -0.0392673  | 0.7948   | 0.880461    | no  |
| Dctpp1  | 46.8717 | 36.4676 | -0.362103   | 0.0394   | 0.0888959   | no  |
| Dcun1d1 | 11.1174 | 10.526  | -0.0788683  | 0.59935  | 0.739271    | no  |
| Dcun1d2 | 7.43849 | 8.40659 | 0.176511    | 0.4209   | 0.579374    | no  |

|         |         |          |            |         |           |    |
|---------|---------|----------|------------|---------|-----------|----|
| Dcun1d3 | 4.26069 | 4.07489  | -0.0643243 | 0.69775 | 0.814565  | no |
| Dcun1d4 | 7.61715 | 7.35503  | -0.0505204 | 0.7472  | 0.848683  | no |
| Dcun1d5 | 76.0909 | 71.3261  | -0.0932936 | 0.52455 | 0.676234  | no |
| Dcxr    | 3.80186 | 3.50085  | -0.118999  | 0.69725 | 0.814156  | no |
| Dda1    | 56.767  | 53.3901  | -0.0884818 | 0.6148  | 0.751786  | no |
| Ddah2   | 1.77117 | 1.44916  | -0.289481  | 0.3959  | 0.554972  | no |
| Ddb1    | 73.1215 | 77.4758  | 0.0834515  | 0.5598  | 0.706287  | no |
| Ddb2    | 26.5371 | 34.765   | 0.389627   | 0.0215  | 0.0531323 | no |
| Ddhd1   | 10.9274 | 10.5087  | -0.056374  | 0.7102  | 0.823177  | no |
| Ddhd2   | 10.5369 | 11.7696  | 0.159613   | 0.2936  | 0.444993  | no |
| Ddi2    | 15.4908 | 15.1793  | -0.0293046 | 0.86485 | 0.923856  | no |
| Ddit3   | 20.9015 | 18.3802  | -0.185453  | 0.62905 | 0.762841  | no |
| Ddit4   | 16.2288 | 14.2578  | -0.186803  | 0.265   | 0.41186   | no |
| Ddost   | 73.6638 | 75.6721  | 0.0388054  | 0.78515 | 0.874258  | no |
| Ddr1    | 1.39342 | 1.92242  | 0.464286   | 0.0447  | 0.0989529 | no |
| Ddrgk1  | 60.9588 | 61.6554  | 0.0163948  | 0.9094  | 0.950036  | no |
| Ddt     | 81.5626 | 84.4818  | 0.0507316  | 0.74975 | 0.85043   | no |
| Ddx1    | 29.4938 | 28.3019  | -0.0595165 | 0.6844  | 0.805052  | no |
| Ddx10   | 21.4427 | 22.5003  | 0.0694585  | 0.6377  | 0.769746  | no |
| Ddx11   | 6.18511 | 5.75803  | -0.103223  | 0.5362  | 0.686425  | no |
| Ddx17   | 143.996 | 140.973  | -0.0306073 | 0.8376  | 0.906977  | no |
| Ddx18   | 32.9463 | 35.13    | 0.0925898  | 0.52865 | 0.67983   | no |
| Ddx19a  | 26.7335 | 26.1938  | -0.0294217 | 0.8377  | 0.907016  | no |
| Ddx19b  | 11.9698 | 12.1703  | 0.0239648  | 0.86965 | 0.926725  | no |
| Ddx20   | 10.1388 | 9.71264  | -0.061951  | 0.71345 | 0.825398  | no |
| Ddx21   | 53.2753 | 54.228   | 0.0255711  | 0.8557  | 0.918195  | no |
| Ddx23   | 51.5288 | 52.5117  | 0.0272601  | 0.8504  | 0.914663  | no |
| Ddx24   | 52.2262 | 53.1375  | 0.024957   | 0.86255 | 0.922292  | no |
| Ddx26b  | 16.7055 | 18.2273  | 0.125778   | 0.39275 | 0.551883  | no |
| Ddx27   | 33.525  | 37.5803  | 0.164742   | 0.2564  | 0.401376  | no |
| Ddx28   | 21.9505 | 25.6856  | 0.226705   | 0.14105 | 0.254541  | no |
| Ddx31   | 9.08235 | 8.78155  | -0.0485901 | 0.76635 | 0.861424  | no |
| Ddx39   | 72.7444 | 63.8418  | -0.188334  | 0.68555 | 0.805733  | no |
| Ddx39b  | 215.909 | 210.395  | -0.0373173 | 0.7971  | 0.881902  | no |
| Ddx3x   | 79.8308 | 84.9546  | 0.0897475  | 0.53015 | 0.681102  | no |
| Ddx3y   | 25.1573 | 26.4799  | 0.073917   | 0.6059  | 0.74441   | no |
| Ddx41   | 39.2457 | 43.0122  | 0.132213   | 0.3585  | 0.516359  | no |
| Ddx42   | 35.2827 | 36.5771  | 0.0519783  | 0.71855 | 0.828704  | no |
| Ddx43   | 1.50189 | 0.986265 | -0.606732  | 0.05285 | 0.113922  | no |
| Ddx46   | 55.0867 | 57.6823  | 0.0664231  | 0.63905 | 0.770756  | no |
| Ddx47   | 69.4043 | 67.8399  | -0.0328917 | 0.81775 | 0.894804  | no |
| Ddx49   | 23.0058 | 22.5282  | -0.0302665 | 0.84915 | 0.913955  | no |
| Ddx5    | 653.833 | 736.303  | 0.171377   | 0.3075  | 0.460698  | no |
| Ddx50   | 38.0867 | 37.1161  | -0.0372441 | 0.7931  | 0.879323  | no |
| Ddx51   | 5.54477 | 6.64015  | 0.260088   | 0.1114  | 0.211122  | no |
| Ddx52   | 32.3676 | 29.1498  | -0.151065  | 0.2949  | 0.446407  | no |
| Ddx54   | 40.5145 | 43.5044  | 0.102722   | 0.4683  | 0.624949  | no |
| Ddx55   | 14.2384 | 15.9139  | 0.1605     | 0.30195 | 0.454525  | no |
| Ddx56   | 10.3346 | 12.0833  | 0.225539   | 0.1519  | 0.269959  | no |
| Ddx58   | 23.7093 | 22.8029  | -0.0562332 | 0.6969  | 0.813896  | no |
| Ddx59   | 6.0344  | 5.67194  | -0.0893697 | 0.64345 | 0.774264  | no |
| Ddx6    | 75.0819 | 82.7237  | 0.139835   | 0.32605 | 0.481298  | no |
| Deaf1   | 17.8459 | 17.1014  | -0.0614767 | 0.72935 | 0.836091  | no |
| Dear1   | 3.46217 | 3.5145   | 0.0216443  | 0.98425 | 0.990848  | no |
| Deb1    | 22.2804 | 21.6525  | -0.041241  | 0.85525 | 0.917949  | no |
| Decr1   | 4.83201 | 4.60588  | -0.0691458 | 0.7185  | 0.828687  | no |
| Decr2   | 3.50488 | 3.91528  | 0.15975    | 0.4768  | 0.632977  | no |

|         |         |         |            |          |             |     |
|---------|---------|---------|------------|----------|-------------|-----|
| Dedd    | 17.4538 | 17.0985 | -0.0296751 | 0.8766   | 0.930885    | no  |
| Dedd2   | 30.1826 | 37.0306 | 0.294999   | 0.0491   | 0.107098    | no  |
| Def6    | 134.467 | 121.78  | -0.142971  | 0.3153   | 0.469089    | no  |
| Def8    | 6.03507 | 6.09757 | 0.0148651  | 0.93065  | 0.962082    | no  |
| Degs1   | 53.6342 | 58.7238 | 0.130792   | 0.3614   | 0.519571    | no  |
| Degs2   | 28.3454 | 32.053  | 0.177346   | 0.49825  | 0.652591    | no  |
| Dek     | 141.1   | 107.885 | -0.38722   | 0.01275  | 0.0337909   | yes |
| Dennd1a | 6.85455 | 7.3595  | 0.102545   | 0.51995  | 0.672046    | no  |
| Dennd1b | 14.7636 | 14.5458 | -0.0214493 | 0.8778   | 0.931626    | no  |
| Dennd1c | 118.794 | 122.274 | 0.0416557  | 0.77205  | 0.865283    | no  |
| Dennd2d | 22.0612 | 22.7812 | 0.0463333  | 0.8052   | 0.887012    | no  |
| Dennd3  | 3.41001 | 3.34307 | -0.0286022 | 0.86865  | 0.926163    | no  |
| Dennd4a | 14.8495 | 14.6481 | -0.0197008 | 0.88985  | 0.938348    | no  |
| Dennd4b | 26.7843 | 25.7847 | -0.0548734 | 0.7013   | 0.816804    | no  |
| Dennd4c | 23.7954 | 31.9966 | 0.427236   | 0.0019   | 0.00637506  | yes |
| Dennd5a | 26.0378 | 20.4215 | -0.350519  | 0.01525  | 0.0394075   | yes |
| Dennd6a | 5.3911  | 5.40854 | 0.00465834 | 0.9804   | 0.988791    | no  |
| Dennd6b | 2.31752 | 2.53216 | 0.127786   | 0.51935  | 0.671554    | no  |
| Denr    | 33.2148 | 33.8333 | 0.0266165  | 0.8566   | 0.918769    | no  |
| Depdc1a | 12.378  | 6.63624 | -0.899347  | 5.00E-05 | 0.000236281 | yes |
| Depdc1b | 13.8547 | 8.32918 | -0.734126  | 5.00E-05 | 0.000236281 | yes |
| Depdc5  | 7.96213 | 8.27518 | 0.0556368  | 0.7459   | 0.847807    | no  |
| Dera    | 34.7929 | 31.2332 | -0.155711  | 0.29945  | 0.451629    | no  |
| Derl1   | 46.8682 | 44.8062 | -0.0649094 | 0.64895  | 0.778453    | no  |
| Derl2   | 16.1544 | 13.9249 | -0.214265  | 0.2501   | 0.39562     | no  |
| Desi1   | 20.483  | 19.7647 | -0.0514998 | 0.73025  | 0.836797    | no  |
| Desi2   | 16.9226 | 17.9453 | 0.084656   | 0.57205  | 0.71639     | no  |
| Det1    | 6.72061 | 7.86524 | 0.226899   | 0.20945  | 0.348328    | no  |
| Dexi    | 11.1658 | 11.3705 | 0.0262025  | 0.88645  | 0.936386    | no  |
| Dffa    | 20.01   | 21.9675 | 0.134647   | 0.43315  | 0.591369    | no  |
| Dffb    | 16.808  | 16.0091 | -0.0702502 | 0.6627   | 0.789047    | no  |
| Dgat1   | 16.1091 | 14.562  | -0.145672  | 0.38595  | 0.544964    | no  |
| Dgcr14  | 13.01   | 12.1959 | -0.093225  | 0.55255  | 0.700168    | no  |
| Dgcr2   | 25.3423 | 24.0632 | -0.0747199 | 0.60625  | 0.744672    | no  |
| Dgcr6   | 1.20141 | 1.82054 | 0.599635   | 0.0874   | 0.172952    | no  |
| Dgcr8   | 15.866  | 14.9297 | -0.0877574 | 0.64385  | 0.774573    | no  |
| Dgka    | 267.945 | 318.421 | 0.248999   | 0.0839   | 0.167217    | no  |
| Dgkd    | 62.4415 | 59.6215 | -0.0666714 | 0.63975  | 0.771311    | no  |
| Dgke    | 6.31157 | 7.57553 | 0.263347   | 0.09335  | 0.182663    | no  |
| Dgkh    | 5.86202 | 5.92645 | 0.0157705  | 0.92325  | 0.95818     | no  |
| Dgkq    | 8.74895 | 8.23206 | -0.087857  | 0.6992   | 0.815516    | no  |
| Dgkz    | 151.373 | 161.892 | 0.0969171  | 0.49965  | 0.653879    | no  |
| Dguok   | 35.613  | 40.336  | 0.179664   | 0.2528   | 0.397114    | no  |
| Dhcr24  | 8.00125 | 7.43812 | -0.105288  | 0.51485  | 0.667668    | no  |
| Dhcr7   | 19.2283 | 15.6277 | -0.29913   | 0.05295  | 0.114106    | no  |
| Dhdds   | 11.5379 | 10.547  | -0.129548  | 0.41765  | 0.57626     | no  |
| Dhfr    | 3.70588 | 2.07948 | -0.833594  | 0.0163   | 0.0417342   | yes |
| Dhodh   | 6.84724 | 7.68355 | 0.166252   | 0.35785  | 0.51577     | no  |
| Dhps    | 30.4696 | 25.3524 | -0.265249  | 0.17435  | 0.301432    | no  |
| Dhrs1   | 39.4803 | 31.5776 | -0.322231  | 0.0338   | 0.0780192   | no  |
| Dhrs11  | 7.54151 | 9.005   | 0.255874   | 0.199    | 0.334903    | no  |
| Dhrs13  | 2.09159 | 3.07803 | 0.55741    | 0.03755  | 0.0853192   | no  |
| Dhrs3   | 1.1525  | 2.96412 | 1.36283    | 0.00015  | 0.000653255 | yes |
| Dhrs4   | 15.9558 | 13.8489 | -0.204308  | 0.27655  | 0.425566    | no  |
| Dhrs7   | 44.6075 | 45.2283 | 0.0199424  | 0.8946   | 0.941248    | no  |
| Dhrs7b  | 12.0395 | 12.5536 | 0.0603271  | 0.7321   | 0.838291    | no  |
| Dhx15   | 105.788 | 106.576 | 0.0107145  | 0.93945  | 0.967227    | no  |



|         |         |          |             |          |             |     |
|---------|---------|----------|-------------|----------|-------------|-----|
| Dhx16   | 58.5976 | 60.1598  | 0.0379589   | 0.78865  | 0.876675    | no  |
| Dhx29   | 11.784  | 11.3996  | -0.0478463  | 0.7617   | 0.858274    | no  |
| Dhx30   | 24.2975 | 25.808   | 0.0870129   | 0.5469   | 0.695368    | no  |
| Dhx32   | 9.97246 | 9.62621  | -0.0509809  | 0.84075  | 0.908896    | no  |
| Dhx33   | 6.68912 | 7.73107  | 0.208853    | 0.1841   | 0.314971    | no  |
| Dhx34   | 11.5236 | 11.2228  | -0.038159   | 0.8021   | 0.885061    | no  |
| Dhx35   | 10.5199 | 10.5268  | 0.000956017 | 0.99555  | 0.997005    | no  |
| Dhx36   | 14.5253 | 14.2643  | -0.0261609  | 0.85775  | 0.919612    | no  |
| Dhx37   | 9.94109 | 9.76806  | -0.0253313  | 0.86395  | 0.923258    | no  |
| Dhx38   | 28.6362 | 27.023   | -0.0836555  | 0.5523   | 0.699965    | no  |
| Dhx40   | 17.9906 | 16.5792  | -0.117876   | 0.4247   | 0.583103    | no  |
| Dhx57   | 12.3527 | 12.2807  | -0.00843456 | 0.9525   | 0.974593    | no  |
| Dhx58   | 8.91855 | 7.81407  | -0.190734   | 0.27595  | 0.424856    | no  |
| Dhx8    | 21.4117 | 21.8273  | 0.0277339   | 0.84885  | 0.913762    | no  |
| Dhx9    | 66.4027 | 67.0929  | 0.0149186   | 0.9182   | 0.955228    | no  |
| Diablo  | 28.958  | 32.1637  | 0.151469    | 0.3124   | 0.466091    | no  |
| Diap1   | 100.252 | 88.5027  | -0.179838   | 0.2018   | 0.338397    | no  |
| Diap2   | 2.72146 | 3.19098  | 0.229621    | 0.1722   | 0.298607    | no  |
| Diap3   | 7.28284 | 4.60244  | -0.662101   | 0.00015  | 0.000653255 | yes |
| Dicer1  | 11.3009 | 12.5253  | 0.148411    | 0.30305  | 0.455695    | no  |
| Dido1   | 17.6422 | 17.4011  | -0.0198537  | 0.89455  | 0.941209    | no  |
| Diexf   | 3.81767 | 4.83804  | 0.34173     | 0.04205  | 0.0939529   | no  |
| Dimt1   | 6.81781 | 8.52772  | 0.322853    | 0.0695   | 0.14297     | no  |
| Dip2a   | 3.55626 | 3.87285  | 0.123033    | 0.4635   | 0.620573    | no  |
| Dip2b   | 8.69882 | 9.94608  | 0.193309    | 0.1774   | 0.30568     | no  |
| Dirc2   | 2.84849 | 4.46119  | 0.647229    | 3.00E-04 | 0.00122185  | yes |
| Dis3    | 6.29488 | 6.51123  | 0.0487521   | 0.8083   | 0.888984    | no  |
| Dis3l   | 13.3336 | 12.6925  | -0.0710923  | 0.64125  | 0.772512    | no  |
| Dis3l2  | 7.67707 | 8.49794  | 0.146557    | 0.37505  | 0.533748    | no  |
| Disc1   | 1.28584 | 1.63773  | 0.348983    | 0.19985  | 0.335909    | no  |
| Dkc1    | 19.5382 | 21.9705  | 0.169266    | 0.343    | 0.499796    | no  |
| Dkkl1   | 6.31621 | 6.92576  | 0.132913    | 0.59645  | 0.736827    | no  |
| Dlat    | 12.2936 | 12.008   | -0.033905   | 0.82685  | 0.900642    | no  |
| Dld     | 37.1327 | 34.3889  | -0.110751   | 0.4481   | 0.605548    | no  |
| Dlg1    | 26.3815 | 27.6796  | 0.0692937   | 0.62775  | 0.761888    | no  |
| Dlg3    | 1.76428 | 1.98979  | 0.173531    | 0.4357   | 0.593828    | no  |
| Dlg4    | 2.14628 | 1.19659  | -0.842908   | 0.0012   | 0.00423153  | yes |
| Dlgap4  | 30.1776 | 29.6324  | -0.0263033  | 0.85965  | 0.92053     | no  |
| Dlgap5  | 14.6531 | 8.43794  | -0.796243   | 5.00E-05 | 0.000236281 | yes |
| Dlst    | 62.203  | 60.9914  | -0.0283793  | 0.83815  | 0.90728     | no  |
| Dmap1   | 16.8514 | 16.7366  | -0.0098626  | 0.9528   | 0.97473     | no  |
| Dmtf1   | 39.1197 | 40.7486  | 0.0588549   | 0.6938   | 0.811685    | no  |
| Dmwd    | 1.49128 | 1.77187  | 0.248723    | 0.3471   | 0.504209    | no  |
| Dmxl1   | 6.33136 | 6.47712  | 0.0328379   | 0.82465  | 0.899106    | no  |
| Dna2    | 3.61997 | 2.16585  | -0.741048   | 3.00E-04 | 0.00122185  | yes |
| Dnaaf2  | 7.88208 | 7.38245  | -0.0944755  | 0.62635  | 0.760795    | no  |
| Dnah11  | 1.19887 | 0.975388 | -0.297631   | 0.3441   | 0.500944    | no  |
| Dnah8   | 9.16827 | 7.2331   | -0.342034   | 0.01735  | 0.0440075   | yes |
| Dnaja1  | 56.099  | 56.6526  | 0.0141694   | 0.93185  | 0.962759    | no  |
| Dnaja2  | 64.4741 | 63.546   | -0.0209171  | 0.8824   | 0.934191    | no  |
| Dnaja3  | 16.3503 | 16.2745  | -0.00670532 | 0.96525  | 0.98104     | no  |
| Dnaja4  | 9.80844 | 10.2049  | 0.0571665   | 0.7215   | 0.830898    | no  |
| Dnajb1  | 61.7604 | 60.1075  | -0.039137   | 0.7835   | 0.873013    | no  |
| Dnajb11 | 80.0968 | 75.2951  | -0.089188   | 0.53005  | 0.68106     | no  |
| Dnajb12 | 20.1277 | 19.9281  | -0.0143845  | 0.9289   | 0.96116     | no  |
| Dnajb13 | 4.93236 | 3.9016   | -0.338213   | 0.1884   | 0.320843    | no  |
| Dnajb14 | 1.35274 | 1.06674  | -0.342667   | 0.31145  | 0.465086    | no  |

|          |          |         |             |          |             |     |
|----------|----------|---------|-------------|----------|-------------|-----|
| Dnajb2   | 3.00972  | 4.87872 | 0.696871    | 0.0038   | 0.0117554   | yes |
| Dnajb4   | 12.6844  | 11.9166 | -0.0900752  | 0.58055  | 0.723683    | no  |
| Dnajb5   | 2.85193  | 3.06304 | 0.103027    | 0.64885  | 0.778413    | no  |
| Dnajb6   | 145.082  | 144.138 | -0.00941854 | 0.94895  | 0.972412    | no  |
| Dnajb9   | 39.6325  | 40.6104 | 0.0351635   | 0.80765  | 0.88856     | no  |
| Dnajc1   | 26.5949  | 25.4306 | -0.0645849  | 0.7276   | 0.834994    | no  |
| Dnajc10  | 18.1103  | 19.4926 | 0.106114    | 0.474    | 0.630386    | no  |
| Dnajc11  | 15.1003  | 16.8707 | 0.159942    | 0.3015   | 0.454012    | no  |
| Dnajc12  | 1.34315  | 1.76683 | 0.39554     | 0.26395  | 0.41059     | no  |
| Dnajc13  | 16.4762  | 16.485  | 0.000771846 | 0.99555  | 0.997005    | no  |
| Dnajc14  | 29.6428  | 26.585  | -0.15707    | 0.3398   | 0.49624     | no  |
| Dnajc15  | 441.183  | 444.675 | 0.0113757   | 0.9349   | 0.964625    | no  |
| Dnajc16  | 5.80794  | 6.54568 | 0.172516    | 0.3022   | 0.454776    | no  |
| Dnajc17  | 12.2172  | 11.8656 | -0.0421304  | 0.8924   | 0.939773    | no  |
| Dnajc18  | 4.18469  | 4.32494 | 0.0475564   | 0.7799   | 0.870555    | no  |
| Dnajc19  | 40.4643  | 39.7728 | -0.024868   | 0.94205  | 0.968604    | no  |
| Dnajc2   | 48.9555  | 47.4472 | -0.0451508  | 0.75605  | 0.854486    | no  |
| Dnajc21  | 23.676   | 21.8382 | -0.116572   | 0.44745  | 0.604855    | no  |
| Dnajc24  | 10.8313  | 11.7631 | 0.119062    | 0.53425  | 0.684699    | no  |
| Dnajc25  | 5.45681  | 5.31965 | -0.0367256  | 0.85855  | 0.92005     | no  |
| Dnajc27  | 2.63714  | 2.80787 | 0.0905063   | 0.6288   | 0.762642    | no  |
| Dnajc3   | 43       | 46.9422 | 0.126548    | 0.36755  | 0.526034    | no  |
| Dnajc30  | 15.1711  | 15.9394 | 0.0712734   | 0.82605  | 0.900174    | no  |
| Dnajc4   | 10.893   | 10.3957 | -0.0674252  | 0.7663   | 0.861395    | no  |
| Dnajc5   | 54.593   | 53.1895 | -0.0375729  | 0.794    | 0.87992     | no  |
| Dnajc6   | 0.111004 | 1.14359 | 3.36488     | 5.00E-05 | 0.000236281 | yes |
| Dnajc7   | 93.9695  | 102.572 | 0.126367    | 0.369    | 0.527596    | no  |
| Dnajc8   | 130.179  | 126.688 | -0.0392154  | 0.7795   | 0.870328    | no  |
| Dnajc9   | 124.483  | 121.486 | -0.0351668  | 0.80415  | 0.886505    | no  |
| Dnal4    | 4.98616  | 5.9519  | 0.255423    | 0.24845  | 0.393751    | no  |
| Dnase1   | 1.22386  | 1.58362 | 0.371786    | 0.77265  | 0.865679    | no  |
| Dnase1l1 | 11.5086  | 11.1298 | -0.0482791  | 0.79145  | 0.878363    | no  |
| Dnase1l2 | 2.91963  | 3.23296 | 0.147068    | 0.60585  | 0.74441     | no  |
| Dnase2a  | 2.83105  | 2.95535 | 0.061991    | 0.81115  | 0.890758    | no  |
| Dnlz     | 9.02253  | 8.5752  | -0.0733624  | 0.7213   | 0.830763    | no  |
| Dnm1l    | 28.7792  | 27.5418 | -0.063406   | 0.66325  | 0.789382    | no  |
| Dnm2     | 130.01   | 130.576 | 0.00626742  | 0.96625  | 0.981604    | no  |
| Dnmbp    | 2.33608  | 2.69131 | 0.204215    | 0.2617   | 0.407845    | no  |
| Dnmt1    | 54.1764  | 40.6535 | -0.414285   | 0.0036   | 0.0112159   | yes |
| Dnmt3a   | 13.6408  | 14.018  | 0.0393552   | 0.78925  | 0.876955    | no  |
| Dnmt3b   | 4.29846  | 4.47398 | 0.0577407   | 0.75055  | 0.850913    | no  |
| Dnpep    | 27.2161  | 26.6456 | -0.0305643  | 0.84455  | 0.911371    | no  |
| Dnttip1  | 37.6537  | 38.1553 | 0.0190909   | 0.9041   | 0.947103    | no  |
| Dnttip2  | 35.0389  | 35.1672 | 0.00527248  | 0.97285  | 0.985048    | no  |
| Doc2a    | 3.57151  | 3.23115 | -0.144484   | 0.69175  | 0.810294    | no  |
| Doc2g    | 2.45213  | 2.53384 | 0.0472893   | 0.86405  | 0.923309    | no  |
| Dock10   | 72.5413  | 77.4917 | 0.0952379   | 0.5025   | 0.656586    | no  |
| Dock11   | 50.5439  | 48.7629 | -0.0517535  | 0.71595  | 0.82703     | no  |
| Dock2    | 216.43   | 230.563 | 0.0912589   | 0.5483   | 0.696596    | no  |
| Dock5    | 35.6404  | 31.0211 | -0.200265   | 0.1565   | 0.276622    | no  |
| Dock8    | 56.661   | 60.9365 | 0.104951    | 0.4646   | 0.621704    | no  |
| Dock9    | 6.7652   | 8.50158 | 0.329599    | 0.02615  | 0.0628972   | no  |
| Dohh     | 22.502   | 22.5206 | 0.00119238  | 0.9971   | 0.997863    | no  |
| Dok1     | 23.4617  | 22.2387 | -0.0772371  | 0.6145   | 0.751549    | no  |
| Dok2     | 137.582  | 134.587 | -0.0317546  | 0.81785  | 0.894872    | no  |
| Dolk     | 2.65235  | 3.07069 | 0.211293    | 0.3786   | 0.537576    | no  |
| Dolpp1   | 10.4479  | 10.3802 | -0.00937448 | 0.9585   | 0.977656    | no  |

|         |         |         |             |          |             |     |
|---------|---------|---------|-------------|----------|-------------|-----|
| Donson  | 22.3648 | 22.2331 | -0.008522   | 0.9526   | 0.974596    | no  |
| Dopey1  | 5.78062 | 6.93546 | 0.262766    | 0.12755  | 0.235433    | no  |
| Dopey2  | 19.7863 | 21.8424 | 0.142627    | 0.31875  | 0.473184    | no  |
| Dos     | 4.32947 | 4.45099 | 0.0399348   | 0.9268   | 0.960127    | no  |
| Dot1l   | 16.5499 | 15.1192 | -0.130439   | 0.3614   | 0.519571    | no  |
| Dpagt1  | 11.5242 | 11.4652 | -0.00740743 | 0.96375  | 0.980433    | no  |
| Dpcd    | 20.6156 | 20.1519 | -0.032816   | 0.88115  | 0.933399    | no  |
| Dpf2    | 39.5781 | 40.1875 | 0.0220442   | 0.88     | 0.932727    | no  |
| Dph1    | 6.32344 | 8.70796 | 0.461624    | 0.0978   | 0.189881    | no  |
| Dph2    | 7.37903 | 7.48899 | 0.0213402   | 0.9051   | 0.947732    | no  |
| Dph3    | 15.9478 | 14.7054 | -0.117009   | 0.5274   | 0.678705    | no  |
| Dph5    | 15.2164 | 18.31   | 0.267       | 0.10855  | 0.206754    | no  |
| Dph6    | 5.48542 | 6.34721 | 0.210521    | 0.24715  | 0.392352    | no  |
| Dph7    | 6.23301 | 6.1106  | -0.0286151  | 0.9075   | 0.949076    | no  |
| Dpm1    | 17.8707 | 18.1445 | 0.021933    | 0.88545  | 0.935946    | no  |
| Dpm2    | 68.0363 | 57.5481 | -0.241536   | 0.11365  | 0.214534    | no  |
| Dpm3    | 74.6598 | 68.0427 | -0.133891   | 0.433    | 0.591233    | no  |
| Dpp3    | 52.7928 | 49.1522 | -0.103085   | 0.47455  | 0.630963    | no  |
| Dpp4    | 50.8634 | 57.7661 | 0.183596    | 0.19795  | 0.333485    | no  |
| Dpp7    | 5.18305 | 6.26034 | 0.272439    | 0.19455  | 0.328967    | no  |
| Dpp8    | 38.4841 | 35.3563 | -0.122297   | 0.38135  | 0.54035     | no  |
| Dpp9    | 35.1016 | 36.2237 | 0.0453977   | 0.7484   | 0.849445    | no  |
| Dpy19l1 | 32.1663 | 28.3788 | -0.180735   | 0.1999   | 0.335953    | no  |
| Dpy19l3 | 7.22392 | 7.38464 | 0.0317458   | 0.8311   | 0.903098    | no  |
| Dpy19l4 | 3.9619  | 3.76371 | -0.0740362  | 0.69825  | 0.814852    | no  |
| Dpy30   | 71.4528 | 68.4494 | -0.0619534  | 0.6928   | 0.81104     | no  |
| Dpysl2  | 8.53329 | 7.58648 | -0.16967    | 0.2824   | 0.432344    | no  |
| Dqx1    | 4.22389 | 3.79688 | -0.153757   | 0.417    | 0.575543    | no  |
| Dr1     | 39.1334 | 36.7107 | -0.0921972  | 0.52085  | 0.672902    | no  |
| Dram2   | 8.16695 | 6.85813 | -0.251981   | 0.1481   | 0.264424    | no  |
| Drap1   | 121.249 | 117.902 | -0.0403854  | 0.7856   | 0.874428    | no  |
| Drg1    | 56.4723 | 50.7629 | -0.153768   | 0.2882   | 0.438844    | no  |
| Drg2    | 24.2934 | 25.9405 | 0.0946454   | 0.5353   | 0.685671    | no  |
| Drosha  | 12.3613 | 14.2378 | 0.203896    | 0.17335  | 0.30013     | no  |
| Dscc1   | 3.55879 | 1.94071 | -0.874799   | 0.0046   | 0.0139281   | yes |
| Dscr3   | 31.1139 | 25.586  | -0.282205   | 0.0554   | 0.11864     | no  |
| Dse     | 6.72513 | 8.84437 | 0.395197    | 0.01355  | 0.0356024   | yes |
| Dsn1    | 9.88501 | 7.68162 | -0.363832   | 0.0386   | 0.0873254   | no  |
| Dstn    | 43.2083 | 33.5221 | -0.366199   | 0.0131   | 0.0345796   | yes |
| Dtd1    | 15.6698 | 17.0934 | 0.125454    | 0.48     | 0.635766    | no  |
| Dtd2    | 3.51684 | 3.61458 | 0.0395477   | 0.84175  | 0.909559    | no  |
| Dtl     | 5.19117 | 2.8954  | -0.842297   | 1.00E-04 | 0.000450026 | yes |
| Dtnb    | 11.343  | 12.6213 | 0.154066    | 0.353    | 0.510594    | no  |
| Dtnbp1  | 17.6346 | 15.4194 | -0.193654   | 0.2669   | 0.414193    | no  |
| Dtwd1   | 4.35144 | 4.36074 | 0.00307854  | 0.9857   | 0.991728    | no  |
| Dtwd2   | 2.29326 | 2.2807  | -0.00792572 | 0.9696   | 0.983591    | no  |
| Dtx1    | 76.6685 | 83.2355 | 0.118565    | 0.40205  | 0.561064    | no  |
| Dtx2    | 10.5169 | 9.7458  | -0.10986    | 0.51315  | 0.66621     | no  |
| Dtx3    | 36.4112 | 42.8992 | 0.236571    | 0.3109   | 0.464461    | no  |
| Dtx3l   | 26.498  | 24.5844 | -0.108142   | 0.5557   | 0.702747    | no  |
| Dtymk   | 60.8416 | 61.1156 | 0.00648166  | 0.96915  | 0.98329     | no  |
| Dus1l   | 28.8124 | 28.0375 | -0.0393322  | 0.79735  | 0.882068    | no  |
| Dus2    | 18.7597 | 25.4153 | 0.438063    | 0.0064   | 0.018565    | yes |
| Dus3l   | 22.9668 | 23.1833 | 0.0135398   | 0.9311   | 0.962421    | no  |
| Dus4l   | 2.92309 | 3.88357 | 0.409887    | 0.0914   | 0.179479    | no  |
| Dusp1   | 64.5569 | 75.4239 | 0.224451    | 0.1196   | 0.223654    | no  |
| Dusp10  | 10.707  | 12.4132 | 0.213323    | 0.18855  | 0.321067    | no  |

|               |         |         |             |          |             |     |
|---------------|---------|---------|-------------|----------|-------------|-----|
| Dusp11        | 51.7625 | 50.5079 | -0.0353988  | 0.80105  | 0.884317    | no  |
| Dusp12        | 9.24178 | 10.5408 | 0.189736    | 0.32515  | 0.480351    | no  |
| Dusp14        | 2.12936 | 1.606   | -0.406946   | 0.1994   | 0.33536     | no  |
| Dusp19        | 10.7391 | 10.104  | -0.0879583  | 0.6377   | 0.769746    | no  |
| Dusp2         | 337.828 | 281.395 | -0.263692   | 0.06285  | 0.131767    | no  |
| Dusp22        | 7.02926 | 6.21696 | -0.177164   | 0.4626   | 0.619721    | no  |
| Dusp23        | 1.07024 | 1.62108 | 0.599029    | 0.10375  | 0.199202    | no  |
| Dusp28        | 3.37989 | 3.48989 | 0.0462071   | 0.8585   | 0.920038    | no  |
| Dusp4         | 1.61658 | 7.24736 | 2.16451     | 5.00E-05 | 0.000236281 | yes |
| Dusp5         | 71.5778 | 78.2139 | 0.127912    | 0.3856   | 0.544633    | no  |
| Dusp6         | 19.1023 | 24.3626 | 0.35092     | 0.01805  | 0.0455881   | yes |
| Dusp7         | 12.5584 | 17.156  | 0.450055    | 0.0033   | 0.0103917   | yes |
| Dut           | 34.0291 | 29.8958 | -0.186824   | 0.20725  | 0.345443    | no  |
| Dvl1          | 18.3813 | 20.3716 | 0.148321    | 0.31975  | 0.474399    | no  |
| Dvl2          | 13.5682 | 14.6663 | 0.112271    | 0.46755  | 0.624314    | no  |
| Dvl3          | 10.6135 | 11.5562 | 0.122766    | 0.4472   | 0.604668    | no  |
| Dxo           | 21.5873 | 18.4109 | -0.229618   | 0.16775  | 0.292509    | no  |
| Dym           | 19.5274 | 23.9215 | 0.292807    | 0.0528   | 0.113832    | no  |
| Dync1h1       | 51.0244 | 57.4027 | 0.16993     | 0.2498   | 0.395358    | no  |
| Dync1i2       | 56.658  | 53.0521 | -0.0948719  | 0.50575  | 0.659721    | no  |
| Dync1li1      | 40.6482 | 38.375  | -0.0830249  | 0.56645  | 0.711713    | no  |
| Dync1li2      | 21.8932 | 17.9844 | -0.283735   | 0.04925  | 0.107378    | no  |
| Dync2h1       | 1.03053 | 1.02918 | -0.00189379 | 0.99305  | 0.995674    | no  |
| Dynll1        | 103.213 | 107.354 | 0.0567462   | 0.6872   | 0.806974    | no  |
| Dynll2        | 21.537  | 17.2443 | -0.320699   | 0.03315  | 0.0767624   | no  |
| Dynlrb1       | 183.593 | 170.595 | -0.105941   | 0.46145  | 0.618544    | no  |
| Dynlt1a       | 3.4675  | 3.41042 | -0.023946   | 0.92305  | 0.958146    | no  |
| Dynlt1b       | 9.47227 | 7.0151  | -0.433247   | 0.08665  | 0.171709    | no  |
| Dynlt3        | 4.88756 | 7.62214 | 0.641083    | 0.00095  | 0.00343861  | yes |
| Dyrk1a        | 22.7062 | 21.6712 | -0.0673094  | 0.6357   | 0.768246    | no  |
| Dyrk1b        | 8.22202 | 7.35355 | -0.161051   | 0.36005  | 0.518052    | no  |
| Dyrk2         | 20.7463 | 21.6872 | 0.0639902   | 0.67965  | 0.801495    | no  |
| Dyx1c1        | 4.98259 | 4.06268 | -0.294465   | 0.18255  | 0.312835    | no  |
| Dzip1         | 4.72434 | 5.21368 | 0.142189    | 0.3953   | 0.554418    | no  |
| Dzip3         | 3.89518 | 4.18806 | 0.104591    | 0.53455  | 0.684984    | no  |
| E030030I06Rik | 3.25007 | 3.47356 | 0.0959421   | 0.74685  | 0.848518    | no  |
| E130012A19Rik | 3.83356 | 3.83345 | -4.35E-05   | 0.9893   | 0.993664    | no  |
| E130308A19Rik | 1.49521 | 1.3051  | -0.196191   | 0.41745  | 0.576063    | no  |
| E130309D02Rik | 24.7357 | 22.4123 | -0.142301   | 0.34645  | 0.503524    | no  |
| E130311K13Rik | 4.88452 | 5.41476 | 0.148681    | 0.5084   | 0.661942    | no  |
| E2f1          | 5.93312 | 3.15959 | -0.909055   | 5.00E-05 | 0.000236281 | yes |
| E2f2          | 40.3353 | 30.931  | -0.38299    | 0.00735  | 0.0209531   | yes |
| E2f3          | 3.72987 | 3.34512 | -0.157066   | 0.3841   | 0.543156    | no  |
| E2f4          | 79.8563 | 79.2921 | -0.0102287  | 0.93985  | 0.96747     | no  |
| E2f5          | 6.19471 | 7.00527 | 0.177405    | 0.56115  | 0.707371    | no  |
| E2f6          | 7.26226 | 7.97996 | 0.135963    | 0.43775  | 0.595736    | no  |
| E2f7          | 2.42441 | 1.25834 | -0.946112   | 5.00E-05 | 0.000236281 | yes |
| E2f8          | 10.7405 | 5.72423 | -0.907903   | 5.00E-05 | 0.000236281 | yes |
| E330009J07Rik | 1.62672 | 2.29685 | 0.497697    | 0.07355  | 0.149692    | no  |
| E430018J23Rik | 1.36308 | 1.76641 | 0.373952    | 0.1907   | 0.323845    | no  |
| E430025E21Rik | 23.0502 | 22.6836 | -0.023132   | 0.8741   | 0.929334    | no  |
| E4f1          | 23.0071 | 25.4089 | 0.143255    | 0.33975  | 0.496208    | no  |
| Eaf1          | 21.8354 | 24.0243 | 0.137827    | 0.3387   | 0.495105    | no  |
| Eapp          | 61.3153 | 55.7713 | -0.136725   | 0.36325  | 0.521455    | no  |
| Ears2         | 3.6735  | 4.6314  | 0.334291    | 0.1322   | 0.242362    | no  |
| Ebag9         | 16.4175 | 15.6981 | -0.0646512  | 0.69995  | 0.815865    | no  |
| Ebna1bp2      | 22.8264 | 23.3458 | 0.032461    | 0.83065  | 0.902789    | no  |

|         |          |          |            |          |             |     |
|---------|----------|----------|------------|----------|-------------|-----|
| Ebp     | 43.9267  | 39.2677  | -0.161754  | 0.2821   | 0.431988    | no  |
| Ebpl    | 8.63391  | 8.12894  | -0.0869476 | 0.63275  | 0.766038    | no  |
| Ecd     | 18.9355  | 17.9266  | -0.0789968 | 0.5998   | 0.739645    | no  |
| Ece1    | 6.33246  | 8.01267  | 0.339517   | 0.032    | 0.0745101   | no  |
| Ece2    | 5.67891  | 7.8097   | 0.459651   | 0.06115  | 0.128823    | no  |
| Ech1    | 153.217  | 141.343  | -0.11637   | 0.41225  | 0.571075    | no  |
| Echdc1  | 1.19836  | 1.47858  | 0.303142   | 0.6634   | 0.789494    | no  |
| Echdc2  | 3.95025  | 8.26653  | 1.06534    | 5.00E-05 | 0.000236281 | yes |
| Echs1   | 40.4406  | 42.3514  | 0.0666051  | 0.66005  | 0.787086    | no  |
| Eci1    | 21.3696  | 30.5369  | 0.514994   | 0.0028   | 0.00898766  | yes |
| Eci2    | 30.5085  | 29.0153  | -0.0723979 | 0.6419   | 0.773031    | no  |
| Ecm1    | 2.31234  | 2.12936  | -0.118934  | 0.6508   | 0.77997     | no  |
| Ecsit   | 24.6922  | 22.4847  | -0.135112  | 0.48345  | 0.638957    | no  |
| Ect2    | 7.67326  | 4.5421   | -0.756481  | 5.00E-05 | 0.000236281 | yes |
| Edaradd | 1.31022  | 2.19956  | 0.747406   | 5.00E-05 | 0.000236281 | yes |
| Edc3    | 13.2802  | 13.4523  | 0.0185657  | 0.9024   | 0.946084    | no  |
| Edc4    | 20.9287  | 22.3145  | 0.0924962  | 0.52565  | 0.677169    | no  |
| Edem1   | 57.6594  | 54.3362  | -0.0856422 | 0.5474   | 0.695716    | no  |
| Edem2   | 27.9923  | 26.7373  | -0.0661744 | 0.65765  | 0.785193    | no  |
| Edem3   | 10.3306  | 10.4734  | 0.019801   | 0.892    | 0.939573    | no  |
| Edf1    | 281.364  | 287.293  | 0.0300874  | 0.82915  | 0.901867    | no  |
| Edrf1   | 7.74387  | 7.96817  | 0.0411948  | 0.78755  | 0.875839    | no  |
| Eea1    | 4.27374  | 4.11196  | -0.0556735 | 0.7198   | 0.829685    | no  |
| Eed     | 40.4491  | 36.4615  | -0.149733  | 0.30485  | 0.457671    | no  |
| Eef1a1  | 6882.89  | 7150.19  | 0.0549674  | 0.8959   | 0.942106    | no  |
| Eef1b2  | 353.797  | 363.244  | 0.0380193  | 0.7906   | 0.877861    | no  |
| Eef1d   | 127.954  | 125.145  | -0.0320178 | 0.82195  | 0.897424    | no  |
| Eef1e1  | 19.3152  | 22.6933  | 0.23253    | 0.18445  | 0.31541     | no  |
| Eef1g   | 504.728  | 501.24   | -0.0100045 | 0.9427   | 0.968976    | no  |
| Eef2    | 1709.61  | 1599.65  | -0.0959103 | 0.66415  | 0.789894    | no  |
| Eef2k   | 0.998929 | 2.17224  | 1.12073    | 5.00E-05 | 0.000236281 | yes |
| Eefsec  | 8.45718  | 8.17191  | -0.0495032 | 0.76695  | 0.861824    | no  |
| Efcab14 | 11.2288  | 11.1541  | -0.0096275 | 0.9485   | 0.972248    | no  |
| Efcab2  | 1.12276  | 0.974232 | -0.204709  | 0.5104   | 0.663714    | no  |
| Efcab4b | 28.4381  | 24.5137  | -0.214234  | 0.19785  | 0.333349    | no  |
| Efcab7  | 2.43852  | 3.40908  | 0.483376   | 0.0577   | 0.122768    | no  |
| Efemp2  | 1.92285  | 1.54082  | -0.319548  | 0.3062   | 0.45917     | no  |
| Efhhd2  | 196.649  | 178.92   | -0.136314  | 0.3429   | 0.499692    | no  |
| Efr3a   | 34.4854  | 34.1092  | -0.0158269 | 0.9092   | 0.949897    | no  |
| Eftud1  | 7.95739  | 8.62972  | 0.11702    | 0.46595  | 0.622896    | no  |
| Eftud2  | 45.481   | 47.0678  | 0.049479   | 0.72975  | 0.836428    | no  |
| Egfl8   | 1.06633  | 0.787234 | -0.437789  | 0.562    | 0.708012    | no  |
| Egln1   | 27.6022  | 24.6083  | -0.165638  | 0.2476   | 0.392801    | no  |
| Egln2   | 23.2869  | 23.9701  | 0.0417131  | 0.785    | 0.87416     | no  |
| Egr1    | 41.4758  | 38.4917  | -0.107722  | 0.45715  | 0.614683    | no  |
| Egr2    | 0.796956 | 1.10216  | 0.467766   | 0.1237   | 0.22966     | no  |
| Ehbp111 | 46.3759  | 41.7917  | -0.150157  | 0.305    | 0.457798    | no  |
| Ehd1    | 24.8924  | 32.4988  | 0.384681   | 0.0081   | 0.022802    | yes |
| Ehd3    | 57.8955  | 60.1732  | 0.0556708  | 0.6954   | 0.812803    | no  |
| Ehd4    | 8.41661  | 7.28706  | -0.207901  | 0.20775  | 0.346088    | no  |
| Ehhadh  | 2.76371  | 2.78711  | 0.0121598  | 0.9509   | 0.973675    | no  |
| Ehmt1   | 15.6657  | 16.0307  | 0.033228   | 0.816    | 0.893637    | no  |
| Ehmt2   | 71.4566  | 68.7155  | -0.0564312 | 0.69165  | 0.810231    | no  |
| Ei24    | 37.9558  | 39.3774  | 0.0530478  | 0.71565  | 0.826832    | no  |
| Eid1    | 27.0901  | 28.6765  | 0.0821028  | 0.57355  | 0.717733    | no  |
| Eid2    | 2.40758  | 3.16142  | 0.392989   | 0.17395  | 0.300925    | no  |
| Eid2b   | 2.11475  | 2.15623  | 0.0280242  | 0.90705  | 0.948831    | no  |

|           |          |         |              |         |           |     |
|-----------|----------|---------|--------------|---------|-----------|-----|
| Eid3      | 0.953389 | 1.03865 | 0.123578     | 0.7315  | 0.83774   | no  |
| Eif1      | 646.547  | 639.815 | -0.0150991   | 0.91965 | 0.956173  | no  |
| Eif1a     | 13.6438  | 14.0609 | 0.0434417    | 0.7765  | 0.868297  | no  |
| Eif1ad    | 32.7781  | 31.3436 | -0.0645623   | 0.775   | 0.867362  | no  |
| Eif1ax    | 73.5969  | 69.0058 | -0.0929286   | 0.53855 | 0.688248  | no  |
| Eif1b     | 65.6427  | 62.5706 | -0.069149    | 0.6532  | 0.781943  | no  |
| Eif2a     | 39.796   | 33.6341 | -0.2427      | 0.3221  | 0.477003  | no  |
| Eif2ak1   | 39.4627  | 36.5735 | -0.109692    | 0.48445 | 0.639895  | no  |
| Eif2ak2   | 7.16152  | 7.49633 | 0.065918     | 0.6795  | 0.801444  | no  |
| Eif2ak3   | 9.87058  | 10.3632 | 0.0702658    | 0.64395 | 0.774667  | no  |
| Eif2ak4   | 3.09431  | 3.28473 | 0.0861578    | 0.6228  | 0.758009  | no  |
| Eif2b1    | 19.59    | 21.5658 | 0.138627     | 0.3782  | 0.537202  | no  |
| Eif2b2    | 40.4455  | 40.761  | 0.0112119    | 0.9398  | 0.967432  | no  |
| Eif2b3    | 8.11227  | 8.62522 | 0.0884557    | 0.64895 | 0.778453  | no  |
| Eif2b4    | 25.8797  | 25.8629 | -0.000940662 | 0.99925 | 0.999321  | no  |
| Eif2b5    | 30.9229  | 30.6397 | -0.013275    | 0.92495 | 0.958971  | no  |
| Eif2d     | 28.6375  | 26.4402 | -0.115169    | 0.45085 | 0.60831   | no  |
| Eif2s1    | 37.4536  | 35.6356 | -0.0717876   | 0.6173  | 0.75385   | no  |
| Eif2s2    | 56.3894  | 51.1688 | -0.140159    | 0.33065 | 0.486298  | no  |
| Eif2s3x   | 55.694   | 53.7702 | -0.0507152   | 0.7249  | 0.833142  | no  |
| Eif2s3y   | 65.3058  | 50.8228 | -0.361736    | 0.0129  | 0.0341475 | yes |
| Eif3a     | 89.7446  | 89.8947 | 0.00241076   | 0.9855  | 0.991597  | no  |
| Eif3b     | 57.2223  | 59.1496 | 0.0477909    | 0.73525 | 0.840507  | no  |
| Eif3c     | 121.805  | 122.174 | 0.00437054   | 0.97485 | 0.986224  | no  |
| Eif3d     | 111.528  | 108.754 | -0.0363445   | 0.802   | 0.884978  | no  |
| Eif3e     | 323.351  | 311.323 | -0.0546912   | 0.69725 | 0.814156  | no  |
| Eif3f     | 460.104  | 443.28  | -0.0537421   | 0.7101  | 0.823088  | no  |
| Eif3g     | 106.091  | 119.464 | 0.171268     | 0.2282  | 0.371279  | no  |
| Eif3h     | 486.312  | 456.041 | -0.0927187   | 0.5135  | 0.66648   | no  |
| Eif3i     | 184.249  | 175.665 | -0.0688264   | 0.62785 | 0.761896  | no  |
| Eif3j1    | 21.4517  | 14.3727 | -0.577762    | 0.38215 | 0.541201  | no  |
| Eif3j2    | 25.1659  | 30.8603 | 0.294285     | 0.5249  | 0.676524  | no  |
| Eif3k     | 338.842  | 322.204 | -0.0726389   | 0.6058  | 0.744365  | no  |
| Eif3l     | 121.15   | 114.997 | -0.0752027   | 0.5977  | 0.737907  | no  |
| Eif3m     | 225.869  | 213.125 | -0.0837896   | 0.5534  | 0.700969  | no  |
| Eif4a1    | 230.295  | 229.442 | -0.00535127  | 0.97015 | 0.98381   | no  |
| Eif4a2    | 200.256  | 207.201 | 0.0491845    | 0.74785 | 0.849094  | no  |
| Eif4a3    | 97.0422  | 99.7438 | 0.0396152    | 0.7809  | 0.871147  | no  |
| Eif4b     | 132.263  | 134.381 | 0.0229115    | 0.8705  | 0.927099  | no  |
| Eif4e     | 25.8762  | 24.262  | -0.0929234   | 0.5266  | 0.677923  | no  |
| Eif4e2    | 67.2498  | 59.6188 | -0.173761    | 0.24335 | 0.388214  | no  |
| Eif4e3    | 13.6223  | 11.5809 | -0.234223    | 0.1464  | 0.261978  | no  |
| Eif4ebp1  | 13.6351  | 14.5856 | 0.0972163    | 0.6119  | 0.749213  | no  |
| Eif4ebp2  | 97.7061  | 104.058 | 0.0908683    | 0.51225 | 0.665396  | no  |
| Eif4ebp3  | 10.3551  | 9.29293 | -0.15613     | 0.43905 | 0.597091  | no  |
| Eif4enif1 | 30.1785  | 30.9169 | 0.0348769    | 0.8102  | 0.890214  | no  |
| Eif4g1    | 75.0128  | 80.4849 | 0.10158      | 0.4649  | 0.62194   | no  |
| Eif4g2    | 156.311  | 151.427 | -0.045796    | 0.7612  | 0.85793   | no  |
| Eif4g3    | 42.3994  | 44.5766 | 0.0722436    | 0.60625 | 0.744672  | no  |
| Eif4h     | 143.911  | 130.204 | -0.144407    | 0.30485 | 0.457671  | no  |
| Eif5      | 75.3827  | 88.1722 | 0.22609      | 0.11205 | 0.212064  | no  |
| Eif5a     | 328.679  | 332.524 | 0.0167814    | 0.90595 | 0.948214  | no  |
| Eif5a2    | 3.28763  | 2.53164 | -0.376973    | 0.0433  | 0.096322  | no  |
| Eif5b     | 14.9298  | 15.7011 | 0.072674     | 0.6233  | 0.758448  | no  |
| Eif6      | 65.3913  | 62.4834 | -0.0656254   | 0.6523  | 0.78121   | no  |
| Elac1     | 4.68824  | 5.0128  | 0.0965702    | 0.56165 | 0.707735  | no  |
| Elac2     | 15.0331  | 13.9082 | -0.11221     | 0.46575 | 0.622735  | no  |

|         |         |         |             |          |             |     |
|---------|---------|---------|-------------|----------|-------------|-----|
| Elavl1  | 14.8709 | 16.1217 | 0.116503    | 0.41425  | 0.573014    | no  |
| Elf1    | 90.0111 | 97.5565 | 0.116135    | 0.435    | 0.593115    | no  |
| Elf2    | 19.9443 | 19.4861 | -0.0335266  | 0.82195  | 0.897424    | no  |
| Elf4    | 99.3758 | 91.3406 | -0.121638   | 0.39625  | 0.555276    | no  |
| Elk1    | 5.33311 | 6.17128 | 0.210593    | 0.2183   | 0.359237    | no  |
| Elk3    | 23.2006 | 22.0959 | -0.0703874  | 0.6304   | 0.763992    | no  |
| Elk4    | 16.7902 | 18.8047 | 0.163467    | 0.26795  | 0.415421    | no  |
| Ell     | 15.4232 | 15.8138 | 0.0360747   | 0.8125   | 0.891603    | no  |
| Ell2    | 2.70731 | 2.93419 | 0.116103    | 0.5576   | 0.704468    | no  |
| Elmo1   | 34.157  | 32.8941 | -0.0543537  | 0.69935  | 0.815556    | no  |
| Elmo2   | 19.5792 | 17.7539 | -0.141186   | 0.33975  | 0.496208    | no  |
| Elmo3   | 1.8643  | 1.69909 | -0.133876   | 0.58035  | 0.723536    | no  |
| Elmod2  | 5.99031 | 5.72071 | -0.0664369  | 0.6849   | 0.805385    | no  |
| Elmod3  | 6.17461 | 6.98824 | 0.178582    | 0.33095  | 0.486618    | no  |
| Elmsan1 | 13.1409 | 14.3489 | 0.126881    | 0.3841   | 0.543156    | no  |
| Elof1   | 37.2481 | 33.6185 | -0.147911   | 0.35275  | 0.510337    | no  |
| Elovl1  | 55.1697 | 46.6371 | -0.242398   | 0.1877   | 0.319913    | no  |
| Elovl5  | 46.6768 | 55.6728 | 0.254269    | 0.0757   | 0.153364    | no  |
| Elovl6  | 2.17186 | 3.79583 | 0.805484    | 5.00E-05 | 0.000236281 | yes |
| Elovl7  | 3.48731 | 2.77111 | -0.331649   | 0.06515  | 0.135551    | no  |
| Elp2    | 29.1581 | 30.9919 | 0.0879961   | 0.54945  | 0.697593    | no  |
| Elp3    | 15.2963 | 16.5082 | 0.110002    | 0.47595  | 0.632182    | no  |
| Elp4    | 2.34253 | 2.42574 | 0.05036     | 0.80925  | 0.889668    | no  |
| Elp5    | 22.3018 | 19.7226 | -0.177312   | 0.58915  | 0.730905    | no  |
| Elp6    | 4.59885 | 4.38603 | -0.0683562  | 0.745    | 0.847261    | no  |
| Emb     | 84.4283 | 145.335 | 0.783583    | 5.00E-05 | 0.000236281 | yes |
| Emc1    | 5.06781 | 5.91167 | 0.222203    | 0.16365  | 0.286804    | no  |
| Emc10   | 57.4285 | 58.9866 | 0.0386208   | 0.78595  | 0.874679    | no  |
| Emc2    | 60.1669 | 56.8508 | -0.0817892  | 0.58165  | 0.724632    | no  |
| Emc3    | 49.3108 | 49.3407 | 0.000875563 | 0.996    | 0.997158    | no  |
| Emc4    | 44.8086 | 44.5428 | -0.008583   | 0.9787   | 0.988093    | no  |
| Emc6    | 33.0229 | 31.6114 | -0.0630192  | 0.6861   | 0.806191    | no  |
| Emc7    | 51.1495 | 48.4884 | -0.0770813  | 0.60885  | 0.746696    | no  |
| Emc8    | 7.01528 | 6.0569  | -0.211922   | 0.18625  | 0.317879    | no  |
| Emc9    | 10.3408 | 11.4359 | 0.14523     | 0.87415  | 0.92936     | no  |
| Emd     | 50.5002 | 45.8973 | -0.137881   | 0.34325  | 0.500026    | no  |
| Eme1    | 6.32294 | 4.08546 | -0.630096   | 0.144    | 0.258529    | no  |
| Eme2    | 4.9911  | 6.66899 | 0.41811     | 0.0553   | 0.118465    | no  |
| Emg1    | 178.85  | 161.182 | -0.150054   | 0.3326   | 0.488301    | no  |
| Eml2    | 21.6548 | 27.1806 | 0.327889    | 0.02995  | 0.0704362   | no  |
| Eml3    | 79.6518 | 85.9538 | 0.109854    | 0.4339   | 0.592198    | no  |
| Eml4    | 12.5795 | 13.4646 | 0.09809     | 0.50495  | 0.658982    | no  |
| Eml5    | 3.73437 | 4.26995 | 0.193353    | 0.4878   | 0.642865    | no  |
| Emp1    | 26.7784 | 30.2613 | 0.176406    | 0.2295   | 0.372801    | no  |
| Emp3    | 365.689 | 304.967 | -0.261967   | 0.0654   | 0.135991    | no  |
| Enc1    | 7.38464 | 6.15388 | -0.26303    | 0.0976   | 0.189576    | no  |
| Endod1  | 15.3129 | 14.8701 | -0.0423416  | 0.7729   | 0.865808    | no  |
| Endog   | 4.32267 | 4.21888 | -0.0350607  | 0.942    | 0.968581    | no  |
| Endov   | 7.42063 | 8.47716 | 0.19204     | 0.2115   | 0.350977    | no  |
| Engase  | 2.8235  | 3.07145 | 0.121432    | 0.52815  | 0.679435    | no  |
| Enkd1   | 4.13669 | 4.09451 | -0.014786   | 0.95385  | 0.975253    | no  |
| Eno1    | 249.906 | 239.58  | -0.0608814  | 0.67435  | 0.797483    | no  |
| Eno3    | 7.27282 | 6.92359 | -0.0709952  | 0.7272   | 0.834752    | no  |
| Enoph1  | 10.8323 | 12.5489 | 0.212225    | 0.2219   | 0.363585    | no  |
| Enox2   | 2.29151 | 2.53274 | 0.144403    | 0.47435  | 0.630792    | no  |
| Enpp1   | 2.6865  | 3.23505 | 0.268061    | 0.19515  | 0.329721    | no  |
| Enpp4   | 1.63096 | 1.50339 | -0.117496   | 0.5945   | 0.735319    | no  |

|          |         |         |             |          |             |     |
|----------|---------|---------|-------------|----------|-------------|-----|
| Ensa     | 60.6054 | 57.7369 | -0.0699529  | 0.6317   | 0.765147    | no  |
| Enthd2   | 12.7135 | 13.0511 | 0.037809    | 0.81025  | 0.890227    | no  |
| Entpd1   | 4.66296 | 1.77344 | -1.3947     | 5.00E-05 | 0.000236281 | yes |
| Entpd4   | 18.0877 | 23.6617 | 0.387544    | 0.0092   | 0.0255019   | yes |
| Entpd5   | 19.5494 | 26.9783 | 0.464673    | 0.00085  | 0.00311418  | yes |
| Entpd6   | 17.0903 | 17.0471 | -0.00364743 | 0.98165  | 0.989458    | no  |
| Entpd7   | 1.18398 | 1.15196 | -0.0395571  | 0.92265  | 0.95797     | no  |
| Eny2     | 11.5881 | 10.7936 | -0.10247    | 0.60805  | 0.746026    | no  |
| Eogt     | 6.82057 | 7.68825 | 0.172763    | 0.30765  | 0.460884    | no  |
| Eomes    | 31.4723 | 21.442  | -0.553645   | 2.00E-04 | 0.0008488   | yes |
| Ep300    | 29.6469 | 30.0972 | 0.0217507   | 0.8823   | 0.934191    | no  |
| Ep400    | 31.1159 | 31.7779 | 0.0303709   | 0.82615  | 0.900213    | no  |
| Epas1    | 4.9313  | 4.49371 | -0.134061   | 0.4231   | 0.581506    | no  |
| Epb4.1   | 61.3991 | 58.5076 | -0.0695924  | 0.62515  | 0.759913    | no  |
| Epb4.1l2 | 10.3157 | 8.50931 | -0.277734   | 0.07255  | 0.148156    | no  |
| Epc1     | 36.3439 | 35.4545 | -0.0357436  | 0.8552   | 0.917923    | no  |
| Epc2     | 14.0181 | 13.1822 | -0.0886959  | 0.55745  | 0.704329    | no  |
| Epg5     | 5.85866 | 6.44748 | 0.138164    | 0.35215  | 0.509605    | no  |
| Ephb6    | 1.30936 | 1.04494 | -0.325441   | 0.20165  | 0.338193    | no  |
| Ephx1    | 5.77275 | 5.74674 | -0.00651632 | 0.9711   | 0.984179    | no  |
| Epm2aip1 | 6.10689 | 6.42452 | 0.0731511   | 0.63395  | 0.766885    | no  |
| Epn1     | 65.0557 | 62.3659 | -0.0609174  | 0.66655  | 0.791814    | no  |
| Eprs     | 24.0622 | 27.0592 | 0.169354    | 0.2399   | 0.385016    | no  |
| Eps15    | 25.0084 | 23.9097 | -0.064815   | 0.6451   | 0.775548    | no  |
| Eps15l1  | 47.9988 | 53.1754 | 0.14776     | 0.3062   | 0.45917     | no  |
| Eps8l1   | 19.3171 | 6.28136 | -1.62073    | 5.00E-05 | 0.000236281 | yes |
| Epsti1   | 406.89  | 316.87  | -0.360746   | 0.0133   | 0.0350342   | yes |
| Ept1     | 6.02398 | 6.57266 | 0.12576     | 0.41355  | 0.572404    | no  |
| Eral1    | 10.8518 | 11.1141 | 0.0344608   | 0.8381   | 0.907254    | no  |
| Erap1    | 43.9648 | 44.0099 | 0.0014824   | 0.99095  | 0.994458    | no  |
| Erb2     | 0.36358 | 1.24258 | 1.773       | 0.04435  | 0.0982922   | no  |
| Erb2ip   | 44.6338 | 45.1344 | 0.0160914   | 0.9106   | 0.950853    | no  |
| Erb3     | 1.33391 | 2.13456 | 0.678277    | 0.0036   | 0.0112159   | yes |
| Erc1     | 1.18248 | 1.04432 | -0.179261   | 0.3839   | 0.542982    | no  |
| Erc1     | 22.5951 | 21.0173 | -0.104436   | 0.6118   | 0.749116    | no  |
| Erc2     | 12.9521 | 13.925  | 0.104489    | 0.52255  | 0.674419    | no  |
| Erc3     | 30.9844 | 29.2507 | -0.0830679  | 0.5709   | 0.715483    | no  |
| Erc4     | 8.01621 | 8.32102 | 0.0538411   | 0.7248   | 0.833108    | no  |
| Erc5     | 10.7161 | 10.6534 | -0.00846961 | 0.9552   | 0.976068    | no  |
| Erc6     | 8.2418  | 8.84395 | 0.101732    | 0.48465  | 0.640016    | no  |
| Erc6l    | 2.6766  | 1.71935 | -0.638535   | 0.00285  | 0.00913278  | yes |
| Erc6l2   | 7.92032 | 8.2893  | 0.0656913   | 0.6734   | 0.79684     | no  |
| Erc8     | 4.61615 | 5.2132  | 0.175481    | 0.38995  | 0.549063    | no  |
| Erf      | 5.82768 | 4.95282 | -0.23467    | 0.1852   | 0.316416    | no  |
| Ergic1   | 9.27595 | 11.2169 | 0.274106    | 0.09945  | 0.192444    | no  |
| Ergic2   | 23.9958 | 23.4455 | -0.0334723  | 0.8459   | 0.911907    | no  |
| Ergic3   | 62.2495 | 62.7709 | 0.0120342   | 0.9361   | 0.965285    | no  |
| Erh      | 149.888 | 130.776 | -0.196789   | 0.1721   | 0.298456    | no  |
| Eri1     | 14.2138 | 12.3646 | -0.201077   | 0.1721   | 0.298456    | no  |
| Eri2     | 6.05632 | 5.94075 | -0.0277957  | 0.87335  | 0.928845    | no  |
| Eri3     | 7.57649 | 15.96   | 1.07486     | 5.00E-05 | 0.000236281 | yes |
| Erich1   | 11.2198 | 13.7447 | 0.292826    | 0.09445  | 0.184376    | no  |
| Erlec1   | 9.12773 | 8.96292 | -0.0262871  | 0.87065  | 0.927217    | no  |
| Erlin1   | 2.88658 | 3.8369  | 0.41058     | 0.0397   | 0.0894841   | no  |
| Erlin2   | 6.84657 | 6.14327 | -0.156376   | 0.34795  | 0.505142    | no  |
| Ermard   | 10.0764 | 8.75827 | -0.202264   | 0.2763   | 0.425311    | no  |
| Ermp1    | 15.6423 | 15.3064 | -0.0313154  | 0.8267   | 0.900576    | no  |



|             |         |          |             |          |             |     |
|-------------|---------|----------|-------------|----------|-------------|-----|
| Ern1        | 9.8585  | 9.11761  | -0.112713   | 0.46685  | 0.62371     | no  |
| Ero1l       | 17.883  | 21.9745  | 0.297241    | 0.03875  | 0.0876254   | no  |
| Ero1lb      | 4.73153 | 4.91648  | 0.055319    | 0.74735  | 0.848799    | no  |
| Erp27       | 2.04821 | 2.66488  | 0.379705    | 0.2815   | 0.43134     | no  |
| Erp29       | 79.2003 | 77.0779  | -0.0391872  | 0.78405  | 0.873405    | no  |
| Erp44       | 43.0773 | 39.9288  | -0.109497   | 0.4441   | 0.601871    | no  |
| Errfi1      | 22.7411 | 18.4911  | -0.298476   | 0.0433   | 0.096322    | no  |
| Esco1       | 26.9177 | 27.9808  | 0.0558814   | 0.69435  | 0.812046    | no  |
| Esco2       | 8.30193 | 4.16697  | -0.994446   | 5.00E-05 | 0.000236281 | yes |
| Esd         | 65.4258 | 59.9067  | -0.127143   | 0.36965  | 0.528225    | no  |
| Esf1        | 8.49375 | 8.58055  | 0.0146688   | 0.928    | 0.96068     | no  |
| Esm1        | 34.4647 | 19.2779  | -0.838174   | 5.00E-05 | 0.000236281 | yes |
| Espl1       | 7.4671  | 4.15065  | -0.84721    | 5.00E-05 | 0.000236281 | yes |
| Esrra       | 17.6989 | 18.7067  | 0.0798915   | 0.74985  | 0.850448    | no  |
| Esyt1       | 345.628 | 345.252  | -0.00157053 | 0.9925   | 0.99532     | no  |
| Esyt2       | 71.3463 | 81.5842  | 0.193451    | 0.1738   | 0.300717    | no  |
| Etaa1       | 8.92405 | 9.09822  | 0.0278857   | 0.86125  | 0.92164     | no  |
| Etf1        | 45.4033 | 46.867   | 0.045775    | 0.7471   | 0.848652    | no  |
| Etf2        | 50.0638 | 46.1513  | -0.117398   | 0.4288   | 0.587077    | no  |
| Etfb        | 109.881 | 102.342  | -0.102548   | 0.47165  | 0.628137    | no  |
| Etfdh       | 20.9473 | 19.7693  | -0.0835023  | 0.5873   | 0.729379    | no  |
| Ethe1       | 9.80984 | 8.86896  | -0.145464   | 0.4367   | 0.594697    | no  |
| Etnk1       | 30.336  | 29.1381  | -0.0581278  | 0.681    | 0.80247     | no  |
| Etohi1      | 9.81774 | 9.93856  | 0.0176458   | 0.9317   | 0.962703    | no  |
| Ets1        | 349.8   | 330.332  | -0.082614   | 0.60335  | 0.742402    | no  |
| Ets2        | 3.6415  | 3.57115  | -0.0281475  | 0.8832   | 0.934631    | no  |
| Etv3        | 10.9315 | 11.389   | 0.0591574   | 0.6877   | 0.807305    | no  |
| Etv6        | 10.5302 | 13.3054  | 0.337488    | 0.02235  | 0.0549252   | no  |
| Eva1b       | 31.996  | 28.198   | -0.182299   | 0.2487   | 0.39405     | no  |
| Evi2a       | 38.6355 | 40.5801  | 0.0708444   | 0.83265  | 0.903961    | no  |
| Evi2a-evi2b | 2.25582 | 1.47996  | -0.608092   | 0.56415  | 0.709897    | no  |
| Evi2b       | 69.3944 | 64.5622  | -0.104129   | 0.5183   | 0.670724    | no  |
| Evi5l       | 2.55401 | 2.32087  | -0.138096   | 0.6161   | 0.752867    | no  |
| Evl         | 118.001 | 134.146  | 0.185007    | 0.2833   | 0.433383    | no  |
| Ewsr1       | 208.243 | 211.282  | 0.0209038   | 0.8882   | 0.937305    | no  |
| Exd2        | 14.4292 | 14.7247  | 0.0292415   | 0.8504   | 0.914663    | no  |
| Exo1        | 1.37978 | 0.715356 | -0.947703   | 4.00E-04 | 0.00158415  | yes |
| Exo5        | 7.41582 | 7.9407   | 0.0986596   | 0.59275  | 0.733862    | no  |
| Exoc1       | 19.5148 | 17.1167  | -0.189167   | 0.2069   | 0.345006    | no  |
| Exoc2       | 26.6312 | 24.4679  | -0.122229   | 0.39415  | 0.553288    | no  |
| Exoc3       | 20.8122 | 20.415   | -0.0277992  | 0.8455   | 0.911753    | no  |
| Exoc4       | 14.8046 | 15.9727  | 0.109555    | 0.47005  | 0.626668    | no  |
| Exoc5       | 22.0035 | 22.7564  | 0.0485403   | 0.7779   | 0.869229    | no  |
| Exoc6       | 19.1221 | 19.5332  | 0.0306882   | 0.84175  | 0.909559    | no  |
| Exoc6b      | 3.85737 | 3.81937  | -0.0142827  | 0.9349   | 0.964625    | no  |
| Exoc7       | 19.3076 | 19.1341  | -0.0130245  | 0.9314   | 0.962533    | no  |
| Exoc8       | 3.5159  | 3.30888  | -0.0875497  | 0.59575  | 0.736272    | no  |
| Exog        | 2.2409  | 2.20484  | -0.0234063  | 0.912    | 0.951738    | no  |
| Exosc1      | 14.2907 | 14.7911  | 0.0496534   | 0.77265  | 0.865679    | no  |
| Exosc10     | 37.3977 | 38.3989  | 0.0381178   | 0.7894   | 0.877095    | no  |
| Exosc2      | 20.5463 | 22.1305  | 0.107157    | 0.5022   | 0.65634     | no  |
| Exosc3      | 49.5125 | 46.4975  | -0.0906393  | 0.55885  | 0.705605    | no  |
| Exosc4      | 19.1102 | 17.631   | -0.116226   | 0.4706   | 0.627105    | no  |
| Exosc5      | 36.3821 | 38.6081  | 0.085677    | 0.58745  | 0.72954     | no  |
| Exosc6      | 17.3871 | 17.5688  | 0.0149988   | 0.9346   | 0.964438    | no  |
| Exosc7      | 36.7595 | 35.3877  | -0.0548681  | 0.73425  | 0.839704    | no  |
| Exosc8      | 61.1532 | 56.3144  | -0.118925   | 0.4258   | 0.584193    | no  |

|          |         |         |             |          |             |     |
|----------|---------|---------|-------------|----------|-------------|-----|
| Exosc9   | 24.7827 | 23.2127 | -0.0944175  | 0.76015  | 0.857308    | no  |
| Ext1     | 1.6506  | 2.70434 | 0.712285    | 0.00215  | 0.00711112  | yes |
| Ext2     | 24.5356 | 25.6456 | 0.0638362   | 0.667    | 0.792141    | no  |
| Extl2    | 2.38705 | 2.75122 | 0.204844    | 0.3491   | 0.506416    | no  |
| Extl3    | 9.02142 | 10.5599 | 0.227175    | 0.12935  | 0.238021    | no  |
| Eya2     | 6.12929 | 11.1753 | 0.866518    | 5.00E-05 | 0.000236281 | yes |
| Eya3     | 16.1399 | 14.6818 | -0.136602   | 0.3507   | 0.508069    | no  |
| Ezh1     | 26.3266 | 27.0236 | 0.0377012   | 0.7923   | 0.878781    | no  |
| Ezh2     | 46.9362 | 36.2902 | -0.371121   | 0.00975  | 0.0268451   | yes |
| Ezr      | 179.96  | 175.519 | -0.0360517  | 0.80115  | 0.884386    | no  |
| F2r      | 65.8114 | 38.3771 | -0.778092   | 5.00E-05 | 0.000236281 | yes |
| F2rl1    | 13.283  | 16.5679 | 0.318811    | 0.0419   | 0.0936534   | no  |
| F2rl2    | 11.8743 | 7.95628 | -0.577673   | 0.3262   | 0.481479    | no  |
| F2rl3    | 9.47927 | 8.31603 | -0.188881   | 0.30875  | 0.462081    | no  |
| F8a      | 7.25093 | 7.53622 | 0.0556757   | 0.75215  | 0.851893    | no  |
| Faah     | 23.6609 | 44.5717 | 0.913621    | 5.00E-05 | 0.000236281 | yes |
| Fabp5    | 7.21616 | 5.99652 | -0.267105   | 0.27225  | 0.420434    | no  |
| Fadd     | 3.88832 | 4.83053 | 0.313033    | 0.10665  | 0.203745    | no  |
| Fads1    | 5.21332 | 3.90302 | -0.417611   | 0.0225   | 0.0552381   | no  |
| Faf1     | 14.2737 | 13.2529 | -0.10705    | 0.4764   | 0.632625    | no  |
| Faf2     | 17.6751 | 17.0566 | -0.0513886  | 0.72795  | 0.835151    | no  |
| Fah      | 2.71844 | 1.84795 | -0.556851   | 0.05275  | 0.113755    | no  |
| Fahd2a   | 6.833   | 6.15703 | -0.150283   | 0.50675  | 0.660574    | no  |
| Faim     | 34.7722 | 33.6712 | -0.0464202  | 0.7743   | 0.866867    | no  |
| Fam101b  | 1.93098 | 3.57746 | 0.889599    | 5.00E-05 | 0.000236281 | yes |
| Fam102a  | 45.0273 | 60.0722 | 0.415898    | 0.0036   | 0.0112159   | yes |
| Fam102b  | 5.9643  | 4.94717 | -0.269749   | 0.0939   | 0.183495    | no  |
| Fam103a1 | 74.9279 | 68.3999 | -0.131507   | 0.35835  | 0.516238    | no  |
| Fam104a  | 17.2976 | 16.5309 | -0.0654068  | 0.7881   | 0.876216    | no  |
| Fam105a  | 76.291  | 69.5062 | -0.134371   | 0.337    | 0.493202    | no  |
| Fam107b  | 307.269 | 346.907 | 0.175051    | 0.23395  | 0.377968    | no  |
| Fam109a  | 1.90652 | 2.28976 | 0.264256    | 0.29995  | 0.452277    | no  |
| Fam109b  | 1.08624 | 0.71648 | -0.60034    | 0.0659   | 0.136877    | no  |
| Fam110a  | 6.20513 | 5.72756 | -0.115541   | 0.55935  | 0.705971    | no  |
| Fam111a  | 37.4032 | 35.911  | -0.0587353  | 0.68155  | 0.80285     | no  |
| Fam114a2 | 35.9037 | 34.0453 | -0.0766757  | 0.59535  | 0.735997    | no  |
| Fam117a  | 77.349  | 64.5734 | -0.260443   | 0.06675  | 0.138199    | no  |
| Fam117b  | 13.1266 | 14.5037 | 0.143934    | 0.32395  | 0.47905     | no  |
| Fam118a  | 9.04669 | 9.03364 | -0.00208266 | 0.9887   | 0.993358    | no  |
| Fam118b  | 12.692  | 11.4082 | -0.153853   | 0.7129   | 0.824965    | no  |
| Fam120a  | 70.3807 | 71.5883 | 0.0245424   | 0.8592   | 0.920258    | no  |
| Fam120b  | 11.5596 | 12.9936 | 0.168714    | 0.2545   | 0.399163    | no  |
| Fam120c  | 1.60525 | 1.86021 | 0.212667    | 0.2522   | 0.396819    | no  |
| Fam122a  | 9.5657  | 10.6404 | 0.153604    | 0.39935  | 0.558367    | no  |
| Fam122b  | 5.40749 | 4.78188 | -0.177383   | 0.3082   | 0.461414    | no  |
| Fam126a  | 10.513  | 9.04467 | -0.217037   | 0.1519   | 0.269959    | no  |
| Fam126b  | 2.33103 | 2.2815  | -0.0309879  | 0.8589   | 0.920102    | no  |
| Fam129a  | 36.1357 | 48.6752 | 0.429764    | 0.0024   | 0.00784462  | yes |
| Fam129b  | 8.45204 | 10.6763 | 0.337036    | 0.0602   | 0.127251    | no  |
| Fam129c  | 3.71847 | 5.15923 | 0.472445    | 0.01815  | 0.0458046   | yes |
| Fam132a  | 1.1844  | 0.90068 | -0.395067   | 0.33575  | 0.49176     | no  |
| Fam133b  | 14.017  | 13.3483 | -0.0705277  | 0.666    | 0.79138     | no  |
| Fam134a  | 33.8203 | 35.5775 | 0.0730732   | 0.61005  | 0.747674    | no  |
| Fam134b  | 18.8445 | 28.0132 | 0.571962    | 5.00E-05 | 0.000236281 | yes |
| Fam134c  | 61.7331 | 62.7501 | 0.0235743   | 0.8675   | 0.925454    | no  |
| Fam136a  | 9.50902 | 11.7247 | 0.302181    | 0.10015  | 0.193517    | no  |
| Fam13b   | 38.6425 | 40.8845 | 0.0813647   | 0.57165  | 0.716105    | no  |

|          |         |          |             |          |             |     |
|----------|---------|----------|-------------|----------|-------------|-----|
| Fam149b  | 24.0614 | 23.2134  | -0.0517652  | 0.736    | 0.841092    | no  |
| Fam151b  | 1.40095 | 0.98463  | -0.508755   | 0.1892   | 0.321964    | no  |
| Fam160a2 | 12.1076 | 14.3976  | 0.249913    | 0.08335  | 0.166299    | no  |
| Fam160b1 | 16.6733 | 16.5879  | -0.00741144 | 0.959    | 0.977954    | no  |
| Fam160b2 | 18.4063 | 18.788   | 0.0296074   | 0.8366   | 0.906367    | no  |
| Fam161a  | 1.19049 | 0.980703 | -0.279669   | 0.411    | 0.569914    | no  |
| Fam162a  | 48.128  | 54.2184  | 0.171908    | 0.3058   | 0.458716    | no  |
| Fam168a  | 6.6547  | 5.53569  | -0.26561    | 0.08555  | 0.169868    | no  |
| Fam168b  | 62.6997 | 60.8492  | -0.0432196  | 0.75945  | 0.856929    | no  |
| Fam169b  | 30.2969 | 43.3726  | 0.517614    | 0.00035  | 0.0014053   | yes |
| Fam172a  | 18.2082 | 17.0879  | -0.0916115  | 0.53     | 0.681045    | no  |
| Fam173a  | 51.1737 | 47.6411  | -0.103195   | 0.5366   | 0.686776    | no  |
| Fam173b  | 11.9054 | 11.7206  | -0.0225762  | 0.9063   | 0.948468    | no  |
| Fam174a  | 9.40843 | 10.6951  | 0.184919    | 0.28255  | 0.432527    | no  |
| Fam174b  | 3.08904 | 6.5917   | 1.09349     | 5.00E-05 | 0.000236281 | yes |
| Fam175a  | 5.42116 | 5.55193  | 0.0343873   | 0.8556   | 0.918143    | no  |
| Fam175b  | 11.1182 | 10.596   | -0.0694078  | 0.66725  | 0.792259    | no  |
| Fam178a  | 9.06732 | 9.41051  | 0.0535967   | 0.714    | 0.825791    | no  |
| Fam179b  | 10.2924 | 11.8588  | 0.204377    | 0.1629   | 0.285738    | no  |
| Fam185a  | 4.85489 | 4.78512  | -0.0208822  | 0.9105   | 0.950791    | no  |
| Fam188a  | 22.905  | 22.2634  | -0.0409925  | 0.78115  | 0.871302    | no  |
| Fam189b  | 47.9079 | 52.2947  | 0.126402    | 0.3726   | 0.531258    | no  |
| Fam192a  | 42.1481 | 39.5453  | -0.0919616  | 0.5332   | 0.683651    | no  |
| Fam193a  | 12.8108 | 12.4867  | -0.0369772  | 0.7993   | 0.88327     | no  |
| Fam193b  | 36.8139 | 34.8537  | -0.0789409  | 0.5832   | 0.72601     | no  |
| Fam195a  | 1.74058 | 2.5276   | 0.538199    | 0.17855  | 0.307256    | no  |
| Fam195b  | 60.8723 | 59.3863  | -0.0356552  | 0.8054   | 0.887094    | no  |
| Fam199x  | 2.19924 | 2.49007  | 0.179183    | 0.3094   | 0.462838    | no  |
| Fam19a3  | 3.27849 | 2.5196   | -0.379836   | 0.05     | 0.108782    | no  |
| Fam203a  | 9.0947  | 10.3488  | 0.186365    | 0.29275  | 0.443981    | no  |
| Fam207a  | 26.6564 | 26.3227  | -0.0181698  | 0.90265  | 0.946135    | no  |
| Fam209   | 1.13215 | 0.941433 | -0.26614    | 0.652    | 0.780984    | no  |
| Fam20b   | 11.9181 | 12.4452  | 0.0624376   | 0.67675  | 0.79937     | no  |
| Fam21    | 28.933  | 29.4827  | 0.0271491   | 0.85305  | 0.916547    | no  |
| Fam210a  | 2.86041 | 3.24314  | 0.181171    | 0.25995  | 0.405637    | no  |
| Fam210b  | 3.78918 | 4.50943  | 0.251057    | 0.16545  | 0.289334    | no  |
| Fam212a  | 1.01172 | 1.35711  | 0.423727    | 0.3395   | 0.495935    | no  |
| Fam212b  | 1.04011 | 0.954659 | -0.123681   | 0.6181   | 0.754461    | no  |
| Fam213a  | 2.59566 | 3.90265  | 0.588352    | 0.02445  | 0.0593789   | no  |
| Fam214a  | 16.3673 | 12.8777  | -0.345934   | 0.01905  | 0.0477889   | yes |
| Fam214b  | 8.48393 | 7.77454  | -0.125975   | 0.44985  | 0.607297    | no  |
| Fam216a  | 10.29   | 12.1189  | 0.236013    | 0.2556   | 0.400479    | no  |
| Fam219a  | 4.56106 | 4.52864  | -0.0102929  | 0.95985  | 0.978369    | no  |
| Fam219b  | 10.5198 | 11.9578  | 0.184852    | 0.24535  | 0.39046     | no  |
| Fam220a  | 11.0158 | 10.7591  | -0.0340113  | 0.83835  | 0.907358    | no  |
| Fam222b  | 3.50142 | 3.51601  | 0.00600124  | 0.97665  | 0.987026    | no  |
| Fam26f   | 13.9891 | 16.4575  | 0.234439    | 0.2013   | 0.337719    | no  |
| Fam32a   | 79.8661 | 76.4871  | -0.0623662  | 0.65695  | 0.784596    | no  |
| Fam35a   | 5.06751 | 5.55051  | 0.131344    | 0.45305  | 0.610601    | no  |
| Fam3a    | 13.4628 | 12.4571  | -0.112005   | 0.5128   | 0.665853    | no  |
| Fam3c    | 14.0094 | 14.6389  | 0.0634158   | 0.68025  | 0.801948    | no  |
| Fam45a   | 13.7107 | 11.997   | -0.192631   | 0.22795  | 0.370975    | no  |
| Fam46a   | 7.93584 | 7.91061  | -0.00459378 | 0.9758   | 0.986676    | no  |
| Fam46c   | 10.6788 | 17.3903  | 0.70354     | 5.00E-05 | 0.000236281 | yes |
| Fam49a   | 32.9584 | 25.8446  | -0.350785   | 0.0141   | 0.0368458   | yes |
| Fam49b   | 71.0685 | 66.0874  | -0.104835   | 0.45905  | 0.616416    | no  |
| Fam50a   | 34.5379 | 34.1467  | -0.0164363  | 0.914    | 0.952853    | no  |

|         |          |         |            |          |             |     |
|---------|----------|---------|------------|----------|-------------|-----|
| Fam53a  | 24.6397  | 26.3034 | 0.0942624  | 0.53255  | 0.683041    | no  |
| Fam53b  | 27.541   | 24.604  | -0.162684  | 0.2585   | 0.403946    | no  |
| Fam53c  | 16.3514  | 15.8357 | -0.0462324 | 0.75175  | 0.851658    | no  |
| Fam57a  | 1.3305   | 1.83407 | 0.463084   | 0.2637   | 0.410265    | no  |
| Fam58b  | 33.4634  | 30.1369 | -0.15105   | 0.33725  | 0.493465    | no  |
| Fam60a  | 17.0751  | 18.0682 | 0.0815598  | 0.59505  | 0.735806    | no  |
| Fam63a  | 17.3154  | 16.5582 | -0.0645104 | 0.6809   | 0.802406    | no  |
| Fam63b  | 13.7997  | 12.7052 | -0.119218  | 0.40515  | 0.564141    | no  |
| Fam64a  | 11.2388  | 6.46469 | -0.79783   | 5.00E-05 | 0.000236281 | yes |
| Fam65a  | 7.13535  | 6.84925 | -0.0590374 | 0.718    | 0.828395    | no  |
| Fam65b  | 151.999  | 155.601 | 0.0337887  | 0.82505  | 0.89939     | no  |
| Fam65c  | 1.10838  | 1.08721 | -0.0278304 | 0.9231   | 0.958146    | no  |
| Fam69a  | 23.0626  | 21.0827 | -0.129491  | 0.88135  | 0.933555    | no  |
| Fam69b  | 0.983552 | 1.3478  | 0.454537   | 0.20765  | 0.345954    | no  |
| Fam71b  | 9.86878  | 8.68456 | -0.184419  | 0.295    | 0.446511    | no  |
| Fam72a  | 2.32031  | 1.43376 | -0.694514  | 0.0133   | 0.0350342   | yes |
| Fam73a  | 4.02009  | 5.45596 | 0.440605   | 0.00775  | 0.0219463   | yes |
| Fam73b  | 2.33708  | 2.73563 | 0.227169   | 0.28155  | 0.43138     | no  |
| Fam76a  | 19.1154  | 18.5927 | -0.0400025 | 0.7923   | 0.878781    | no  |
| Fam76b  | 20.0263  | 18.2419 | -0.134636  | 0.3607   | 0.518786    | no  |
| Fam78a  | 70.8647  | 84.9911 | 0.262245   | 0.06865  | 0.141502    | no  |
| Fam78b  | 1.68678  | 1.79634 | 0.0907858  | 0.66125  | 0.787998    | no  |
| Fam83d  | 2.42298  | 1.43074 | -0.760021  | 0.00615  | 0.0179275   | yes |
| Fam84b  | 2.674    | 2.82541 | 0.0794636  | 0.68785  | 0.807455    | no  |
| Fam86   | 12.2143  | 12.9477 | 0.0841284  | 0.7015   | 0.816875    | no  |
| Fam89a  | 3.56143  | 3.72589 | 0.0651265  | 0.7998   | 0.883559    | no  |
| Fam89b  | 92.6179  | 74.2729 | -0.318454  | 0.0279   | 0.0663781   | no  |
| Fam92a  | 24.2442  | 22.5018 | -0.107598  | 0.50975  | 0.663088    | no  |
| Fam96a  | 76.4771  | 72.1831 | -0.0833663 | 0.56355  | 0.709382    | no  |
| Fam96b  | 60.0701  | 53.5953 | -0.164541  | 0.31315  | 0.466894    | no  |
| Fam98a  | 13.6093  | 13.1776 | -0.0465018 | 0.7657   | 0.861063    | no  |
| Fam98b  | 32.5475  | 32.6936 | 0.00645956 | 0.9674   | 0.982263    | no  |
| Fam98c  | 21.0475  | 20.6994 | -0.0240601 | 0.8986   | 0.943838    | no  |
| Fan1    | 2.9852   | 3.02389 | 0.0185737  | 0.9245   | 0.958814    | no  |
| Fanca   | 4.09622  | 3.01028 | -0.444392  | 0.21675  | 0.357462    | no  |
| FanCb   | 1.47758  | 1.19721 | -0.303569  | 0.2565   | 0.401514    | no  |
| Fancc   | 3.63079  | 3.01498 | -0.268133  | 0.53445  | 0.684918    | no  |
| FanCd2  | 2.90646  | 1.90272 | -0.611198  | 0.00245  | 0.0079866   | yes |
| Fance   | 11.5877  | 10.7154 | -0.112902  | 0.51215  | 0.665278    | no  |
| FanCf   | 5.04314  | 3.88944 | -0.37476   | 0.09415  | 0.183907    | no  |
| FanCg   | 10.858   | 10.7208 | -0.0183544 | 0.90815  | 0.949429    | no  |
| Fanci   | 3.60143  | 2.21595 | -0.700643  | 0.12705  | 0.234713    | no  |
| FanCl   | 8.25095  | 6.31848 | -0.384982  | 0.2137   | 0.353754    | no  |
| FanCm   | 3.51339  | 2.91397 | -0.269878  | 0.1076   | 0.205299    | no  |
| Far1    | 31.0315  | 29.2639 | -0.0846137 | 0.55635  | 0.703279    | no  |
| Far2    | 2.22276  | 1.9308  | -0.203151  | 0.6921   | 0.810556    | no  |
| Farp1   | 3.00459  | 3.332   | 0.149218   | 0.4148   | 0.573583    | no  |
| Fars2   | 11.1924  | 11.228  | 0.00457983 | 0.9778   | 0.987609    | no  |
| Farsa   | 32.7309  | 33.2934 | 0.0245849  | 0.86905  | 0.926349    | no  |
| Farsb   | 22.3851  | 24.4672 | 0.128309   | 0.39745  | 0.556515    | no  |
| Fas     | 30.5699  | 27.1178 | -0.172867  | 0.36155  | 0.519723    | no  |
| Fasl    | 22.1389  | 13.8052 | -0.681369  | 5.00E-05 | 0.000236281 | yes |
| Fasn    | 12.4163  | 15.0073 | 0.273433   | 0.05305  | 0.11429     | no  |
| Fastk   | 31.7871  | 33.1341 | 0.0598786  | 0.69335  | 0.811428    | no  |
| Fastkd1 | 4.52906  | 5.65473 | 0.320249   | 0.0851   | 0.169169    | no  |
| Fastkd2 | 4.89882  | 6.15688 | 0.329764   | 0.06255  | 0.131251    | no  |
| Fastkd3 | 5.92081  | 6.11983 | 0.047696   | 0.7955   | 0.880877    | no  |

|         |         |         |             |          |             |     |
|---------|---------|---------|-------------|----------|-------------|-----|
| Fastkd5 | 3.45769 | 3.46865 | 0.00456482  | 0.9856   | 0.99167     | no  |
| Fau     | 2806.67 | 2938.87 | 0.0664033   | 0.65375  | 0.782363    | no  |
| Fbf1    | 3.75354 | 4.21019 | 0.165633    | 0.3353   | 0.491284    | no  |
| Fbl     | 79.6415 | 88.8573 | 0.15797     | 0.26905  | 0.416769    | no  |
| Fbrs    | 53.2842 | 57.4317 | 0.108139    | 0.4347   | 0.592843    | no  |
| Fbrsl1  | 7.70209 | 7.89121 | 0.0349964   | 0.8514   | 0.915404    | no  |
| Fbxl12  | 19.8388 | 18.7503 | -0.0814107  | 0.79525  | 0.880766    | no  |
| Fbxl14  | 29.5586 | 31.9706 | 0.113167    | 0.4272   | 0.585602    | no  |
| Fbxl15  | 3.89507 | 3.20033 | -0.283428   | 0.5663   | 0.711626    | no  |
| Fbxl17  | 1.93409 | 2.37843 | 0.298357    | 0.05465  | 0.117268    | no  |
| Fbxl18  | 2.86243 | 3.09887 | 0.1145      | 0.586    | 0.728239    | no  |
| Fbxl19  | 5.27068 | 4.80946 | -0.132114   | 0.4609   | 0.618018    | no  |
| Fbxl2   | 5.58679 | 3.85306 | -0.536014   | 0.30275  | 0.455399    | no  |
| Fbxl20  | 9.42025 | 9.32135 | -0.0152268  | 0.91315  | 0.952493    | no  |
| Fbxl22  | 2.97465 | 2.60058 | -0.193887   | 0.8071   | 0.888135    | no  |
| Fbxl3   | 24.7593 | 25.6216 | 0.0493894   | 0.72755  | 0.834964    | no  |
| Fbxl4   | 5.17428 | 5.36281 | 0.051631    | 0.78275  | 0.872521    | no  |
| Fbxl5   | 25.2833 | 25.3273 | 0.0025085   | 0.9872   | 0.992544    | no  |
| Fbxl6   | 38.7359 | 40.5419 | 0.0657419   | 0.65905  | 0.786332    | no  |
| Fbxl8   | 16.2313 | 14.0026 | -0.213081   | 0.19675  | 0.331892    | no  |
| Fbxo11  | 24.4098 | 24.3082 | -0.00601723 | 0.97095  | 0.984084    | no  |
| Fbxo18  | 21.2851 | 20.7029 | -0.040006   | 0.78505  | 0.874202    | no  |
| Fbxo21  | 6.57837 | 6.56    | -0.00403343 | 0.97975  | 0.988568    | no  |
| Fbxo22  | 31.4451 | 34.5689 | 0.136639    | 0.3674   | 0.525862    | no  |
| Fbxo25  | 13.8565 | 11.5238 | -0.265938   | 0.1119   | 0.211888    | no  |
| Fbxo27  | 1.11531 | 2.1365  | 0.937804    | 0.00315  | 0.00997458  | yes |
| Fbxo28  | 16.211  | 15.033  | -0.108838   | 0.4531   | 0.610657    | no  |
| Fbxo3   | 24.5628 | 24.1109 | -0.0267911  | 0.87905  | 0.932336    | no  |
| Fbxo30  | 2.15659 | 2.28355 | 0.0825245   | 0.6759   | 0.798741    | no  |
| Fbxo31  | 10.5035 | 9.62054 | -0.126681   | 0.40455  | 0.563472    | no  |
| Fbxo32  | 3.88776 | 3.80561 | -0.0308108  | 0.84925  | 0.913955    | no  |
| Fbxo33  | 20.4684 | 21.2247 | 0.052347    | 0.722    | 0.831176    | no  |
| Fbxo34  | 8.23454 | 7.67291 | -0.101915   | 0.54855  | 0.696814    | no  |
| Fbxo38  | 22.1225 | 23.6057 | 0.0936222   | 0.508    | 0.661629    | no  |
| Fbxo4   | 4.41771 | 4.93328 | 0.159246    | 0.37965  | 0.538601    | no  |
| Fbxo42  | 10.0187 | 9.47927 | -0.079849   | 0.5952   | 0.735889    | no  |
| Fbxo44  | 1.4954  | 1.18427 | -0.336535   | 0.3176   | 0.471844    | no  |
| Fbxo45  | 7.76464 | 7.75117 | -0.00250503 | 0.9894   | 0.99368     | no  |
| Fbxo46  | 11.3213 | 11.0335 | -0.0371502  | 0.81385  | 0.892265    | no  |
| Fbxo48  | 2.38858 | 2.00661 | -0.25139    | 0.32915  | 0.484749    | no  |
| Fbxo5   | 24.7191 | 13.7365 | -0.847614   | 5.00E-05 | 0.000236281 | yes |
| Fbxo6   | 13.6368 | 16.27   | 0.254705    | 0.16365  | 0.286804    | no  |
| Fbxo7   | 18.2004 | 19.9246 | 0.130582    | 0.4104   | 0.569351    | no  |
| Fbxo8   | 7.89177 | 7.51526 | -0.0705255  | 0.6658   | 0.79123     | no  |
| Fbxo9   | 26.1243 | 27.0414 | 0.0497775   | 0.74655  | 0.8483      | no  |
| Fbxw11  | 16.5313 | 16.9125 | 0.0328892   | 0.81765  | 0.894764    | no  |
| Fbxw17  | 9.8415  | 9.55527 | -0.0425823  | 0.80675  | 0.887929    | no  |
| Fbxw2   | 43.8984 | 39.9542 | -0.135822   | 0.3486   | 0.505857    | no  |
| Fbxw4   | 17.8369 | 15.526  | -0.200181   | 0.31455  | 0.468378    | no  |
| Fbxw5   | 26.3189 | 26.756  | 0.0237663   | 0.87285  | 0.928593    | no  |
| Fbxw7   | 14.7358 | 14.4682 | -0.0264399  | 0.8599   | 0.920728    | no  |
| Fbxw8   | 10.1456 | 11.499  | 0.18065     | 0.2374   | 0.382072    | no  |
| Fbxw9   | 1.43437 | 1.9724  | 0.459537    | 0.60445  | 0.743289    | no  |
| Fcer1g  | 1.62344 | 2.03876 | 0.328641    | 0.4807   | 0.636407    | no  |
| Fcf1    | 78.7386 | 74.8285 | -0.073484   | 0.63365  | 0.766641    | no  |
| Fcgr2b  | 18.102  | 12.957  | -0.48242    | 0.00555  | 0.0163959   | yes |
| Fcgr3   | 1.12989 | 1.67984 | 0.572143    | 0.1231   | 0.228751    | no  |

|          |          |          |             |          |             |     |
|----------|----------|----------|-------------|----------|-------------|-----|
| Fcgrt    | 36.8017  | 0.107374 | -8.42098    | 0.0058   | 0.017041    | yes |
| Fcho1    | 76.1513  | 71.5859  | -0.0891931  | 0.52345  | 0.675247    | no  |
| Fcho2    | 17.3222  | 18.4204  | 0.0886882   | 0.5372   | 0.687294    | no  |
| Fchsd1   | 10.0499  | 9.40799  | -0.0952218  | 0.5394   | 0.689047    | no  |
| Fchsd2   | 11.3914  | 15.1797  | 0.414197    | 0.00545  | 0.0161396   | yes |
| Fcrl1    | 1.10158  | 0.991356 | -0.152105   | 0.6529   | 0.781717    | no  |
| Fdft1    | 10.712   | 10.4088  | -0.0414186  | 0.91845  | 0.955375    | no  |
| Fdps     | 21.4796  | 21.9517  | 0.0313674   | 0.8505   | 0.914715    | no  |
| Fdx1     | 9.17261  | 9.48812  | 0.0487887   | 0.8276   | 0.900973    | no  |
| Fdx1l    | 17.9007  | 17.1039  | -0.065689   | 0.91545  | 0.953604    | no  |
| Fdxacb1  | 6.09523  | 5.62882  | -0.114849   | 0.5616   | 0.707698    | no  |
| Fdxr     | 20.1241  | 18.5091  | -0.12069    | 0.45295  | 0.610536    | no  |
| Fech     | 8.90691  | 8.48883  | -0.0693605  | 0.67035  | 0.79467     | no  |
| Fem1a    | 9.33474  | 9.65107  | 0.0480795   | 0.74495  | 0.847218    | no  |
| Fem1b    | 7.17863  | 6.25525  | -0.198642   | 0.1973   | 0.332692    | no  |
| Fem1c    | 16.7956  | 18.7377  | 0.157854    | 0.30395  | 0.456727    | no  |
| Fen1     | 20.2134  | 16.6999  | -0.275474   | 0.0809   | 0.162085    | no  |
| Fermt3   | 126.85   | 117.261  | -0.113395   | 0.4175   | 0.576109    | no  |
| Fes      | 1.17629  | 1.57622  | 0.422219    | 0.1192   | 0.223072    | no  |
| Fez2     | 11.5116  | 9.97455  | -0.206765   | 0.45725  | 0.614736    | no  |
| Fgd3     | 22.6542  | 22.7641  | 0.00698523  | 0.96275  | 0.980023    | no  |
| Fgd6     | 1.61515  | 1.81651  | 0.169494    | 0.3596   | 0.517584    | no  |
| Fgf13    | 43.9644  | 45.4375  | 0.0475451   | 0.7457   | 0.847675    | no  |
| Fgfr1op  | 6.96233  | 7.62056  | 0.130328    | 0.43895  | 0.597024    | no  |
| Fgfr1op2 | 85.868   | 84.474   | -0.023612   | 0.86545  | 0.924119    | no  |
| Fgl2     | 12.3518  | 5.45449  | -1.1792     | 5.00E-05 | 0.000236281 | yes |
| Fgr      | 5.0927   | 6.04354  | 0.246964    | 0.1605   | 0.282286    | no  |
| Fh1      | 32.9177  | 33.3815  | 0.0201823   | 0.89265  | 0.939939    | no  |
| Fhit     | 0.741227 | 1.13512  | 0.614853    | 0.21855  | 0.359573    | no  |
| Fhl2     | 34.8145  | 31.046   | -0.165283   | 0.27535  | 0.424182    | no  |
| Fhl3     | 7.25175  | 8.28123  | 0.191517    | 0.3205   | 0.475212    | no  |
| Fhod1    | 18.2543  | 18.514   | 0.0203818   | 0.887    | 0.936686    | no  |
| Fibp     | 44.388   | 40.8467  | -0.119948   | 0.4341   | 0.592357    | no  |
| Ficd     | 3.62744  | 3.44367  | -0.0750077  | 0.7011   | 0.816679    | no  |
| Fig4     | 12.9465  | 12.2054  | -0.0850429  | 0.5842   | 0.726847    | no  |
| Figl1    | 9.07964  | 4.59187  | -0.983553   | 5.00E-05 | 0.000236281 | yes |
| Filip1l  | 7.21086  | 9.73266  | 0.432662    | 0.0123   | 0.0327694   | yes |
| Fip11l   | 50.0153  | 46.5822  | -0.102589   | 0.48075  | 0.636449    | no  |
| Fis1     | 168.36   | 153.857  | -0.129959   | 0.36515  | 0.523501    | no  |
| Fitm2    | 0.981661 | 1.25439  | 0.353686    | 0.32865  | 0.484184    | no  |
| Fiz1     | 13.9132  | 13.7328  | -0.018827   | 0.90715  | 0.948893    | no  |
| Fkbp10   | 1.9895   | 0.207879 | -3.25859    | 0.1031   | 0.198186    | no  |
| Fkbp11   | 1.01413  | 0.36286  | -1.48276    | 0.074    | 0.150438    | no  |
| Fkbp15   | 26.1044  | 26.382   | 0.0152619   | 0.914    | 0.952853    | no  |
| Fkbp1a   | 104.385  | 110.922  | 0.0876206   | 0.53415  | 0.684621    | no  |
| Fkbp2    | 45.4857  | 37.9406  | -0.261673   | 0.13365  | 0.244449    | no  |
| Fkbp3    | 130.387  | 134.796  | 0.0479688   | 0.80985  | 0.890037    | no  |
| Fkbp4    | 64.5647  | 69.0792  | 0.0975064   | 0.4942   | 0.648864    | no  |
| Fkbp5    | 41.7273  | 50.2104  | 0.266994    | 0.05825  | 0.123767    | no  |
| Fkbp7    | 1.44516  | 1.74479  | 0.271824    | 0.5135   | 0.66648     | no  |
| Fkbp8    | 168.785  | 169.35   | 0.00481723  | 0.97465  | 0.986135    | no  |
| Fkbppl   | 2.75545  | 2.79528  | 0.0207067   | 0.937    | 0.965818    | no  |
| Fkrp     | 12.2912  | 13.4998  | 0.135312    | 0.63275  | 0.766038    | no  |
| Fktn     | 1.14339  | 1.41162  | 0.304033    | 0.24415  | 0.389129    | no  |
| Flad1    | 27.6259  | 27.5813  | -0.00232766 | 0.9874   | 0.992674    | no  |
| Flcn     | 14.8478  | 14.6651  | -0.0178572  | 0.905    | 0.947698    | no  |
| Fli1     | 40.3002  | 43.0797  | 0.0962193   | 0.49755  | 0.651977    | no  |

|          |          |         |            |          |             |     |
|----------|----------|---------|------------|----------|-------------|-----|
| Flii     | 75.3944  | 69.1375 | -0.124988  | 0.42685  | 0.585258    | no  |
| Flna     | 273.808  | 258.788 | -0.0813963 | 0.6255   | 0.760155    | no  |
| Flnb     | 13.4652  | 15.351  | 0.189098   | 0.17795  | 0.30644     | no  |
| Flot1    | 62.4711  | 69.9194 | 0.162504   | 0.2492   | 0.394612    | no  |
| Flot2    | 23.0983  | 20.5415 | -0.169243  | 0.2574   | 0.402575    | no  |
| Flt3l    | 100.971  | 61.6584 | -0.711568  | 5.00E-05 | 0.000236281 | yes |
| Flywch1  | 9.90834  | 11.7181 | 0.242022   | 0.14685  | 0.262617    | no  |
| Fmnl1    | 302.34   | 301.092 | -0.0059632 | 0.969    | 0.983223    | no  |
| Fmnl3    | 3.61123  | 4.11935 | 0.189925   | 0.2843   | 0.434499    | no  |
| Fmo5     | 1.79358  | 1.57719 | -0.185486  | 0.3717   | 0.530274    | no  |
| Fmr1     | 23.5934  | 21.8428 | -0.111222  | 0.43925  | 0.597283    | no  |
| Fn3k     | 1.22602  | 2.81961 | 1.20152    | 0.00505  | 0.0151078   | yes |
| Fn3krp   | 3.01897  | 2.87644 | -0.0697731 | 0.7726   | 0.865678    | no  |
| Fnbp1    | 110.539  | 111.868 | 0.0172452  | 0.90575  | 0.948089    | no  |
| Fnbp4    | 39.6013  | 43.3055 | 0.129003   | 0.36425  | 0.522519    | no  |
| Fndc3a   | 8.34293  | 9.68097 | 0.214598   | 0.1529   | 0.271415    | no  |
| Fndc9    | 6.94503  | 6.15336 | -0.174609  | 0.8833   | 0.934706    | no  |
| Fnip1    | 5.00451  | 5.44246 | 0.12103    | 0.4439   | 0.60167     | no  |
| Fnta     | 37.9983  | 34.2062 | -0.151679  | 0.30645  | 0.459486    | no  |
| Fntb     | 5.21279  | 5.59518 | 0.102128   | 0.58785  | 0.729857    | no  |
| Focad    | 4.76584  | 6.11815 | 0.360366   | 0.0243   | 0.0590614   | no  |
| Folr4    | 1.367    | 1.91261 | 0.484525   | 0.1637   | 0.286877    | no  |
| Fopnl    | 37.6695  | 34.9929 | -0.106337  | 0.48645  | 0.641637    | no  |
| Fos      | 131.232  | 155.121 | 0.241271   | 0.0979   | 0.190043    | no  |
| Fosb     | 49.9084  | 65.7629 | 0.397991   | 0.006    | 0.0175533   | yes |
| Fosl2    | 7.84619  | 8.62974 | 0.137325   | 0.36735  | 0.525822    | no  |
| Foxd2    | 1.90815  | 1.19302 | -0.677554  | 0.01425  | 0.0371649   | yes |
| Foxj2    | 13.2574  | 14.0082 | 0.0794704  | 0.5873   | 0.729379    | no  |
| Foxj3    | 16.0947  | 16.635  | 0.0476393  | 0.74545  | 0.847514    | no  |
| Foxk1    | 18.2662  | 19.2559 | 0.0761253  | 0.5845   | 0.727053    | no  |
| Foxk2    | 12.7115  | 12.2427 | -0.0542079 | 0.71435  | 0.825939    | no  |
| Foxm1    | 17.944   | 10.455  | -0.779302  | 5.00E-05 | 0.000236281 | yes |
| Foxn2    | 19.5437  | 18.8934 | -0.0488251 | 0.73135  | 0.837636    | no  |
| Foxn3    | 14.8105  | 13.0895 | -0.178212  | 0.26035  | 0.406127    | no  |
| Foxo1    | 30.3022  | 38.1342 | 0.331661   | 0.02145  | 0.0530292   | no  |
| Foxo3    | 13.6224  | 13.1265 | -0.0535006 | 0.7279   | 0.835107    | no  |
| Foxo4    | 20.3296  | 19.7311 | -0.0431096 | 0.7675   | 0.862126    | no  |
| Foxp1    | 17.2709  | 17.6749 | 0.0333599  | 0.81305  | 0.891845    | no  |
| Foxp4    | 28.3413  | 36.2273 | 0.354172   | 0.0125   | 0.0332244   | yes |
| Foxred1  | 16.2427  | 17.1112 | 0.0751503  | 0.6285   | 0.762422    | no  |
| Foxred2  | 0.919822 | 1.79693 | 0.966105   | 0.00015  | 0.000653255 | yes |
| Fpgs     | 6.41602  | 7.98819 | 0.31619    | 0.08545  | 0.169712    | no  |
| Fpgt     | 4.87901  | 4.97766 | 0.0288776  | 0.86805  | 0.925747    | no  |
| Fra10ac1 | 12.0256  | 13.0216 | 0.114798   | 0.5262   | 0.677593    | no  |
| Frat1    | 5.31307  | 5.41992 | 0.0287254  | 0.87315  | 0.928702    | no  |
| Frat2    | 23.1006  | 23.976  | 0.0536579  | 0.72095  | 0.830536    | no  |
| Frg1     | 89.1591  | 86.1451 | -0.0496128 | 0.73315  | 0.838935    | no  |
| Frm4a    | 0.605655 | 1.03567 | 0.774004   | 0.0024   | 0.00784462  | yes |
| Frm4b    | 3.1403   | 2.51161 | -0.322288  | 0.08025  | 0.160984    | no  |
| Frm46    | 2.65552  | 2.29056 | -0.213293  | 0.27415  | 0.42274     | no  |
| Frm47    | 3.81524  | 4.04473 | 0.0842723  | 0.6324   | 0.765785    | no  |
| Frm48    | 81.8877  | 96.9073 | 0.24296    | 0.0842   | 0.167735    | no  |
| Frrs1    | 13.3099  | 16.8571 | 0.340863   | 0.03125  | 0.0730529   | no  |
| Frs2     | 6.45347  | 6.50774 | 0.0120804  | 0.9378   | 0.966332    | no  |
| Fry      | 4.28864  | 4.31306 | 0.00819025 | 0.9563   | 0.97657     | no  |
| Fryl     | 54.7709  | 57.5225 | 0.0707172  | 0.6164   | 0.75309     | no  |
| Fth1     | 502.51   | 555.07  | 0.143515   | 0.31115  | 0.464756    | no  |

|            |         |         |             |          |             |     |
|------------|---------|---------|-------------|----------|-------------|-----|
| Ftl1       | 528.229 | 520.367 | -0.0216334  | 0.8782   | 0.931855    | no  |
| Fto        | 12.5684 | 13.1613 | 0.0665011   | 0.6671   | 0.792188    | no  |
| Ftsj1      | 4.48793 | 4.24523 | -0.0802068  | 0.659    | 0.786299    | no  |
| Ftsj2      | 5.86244 | 6.03347 | 0.0414879   | 0.85275  | 0.916381    | no  |
| Ftsj3      | 29.1821 | 32.0327 | 0.134461    | 0.35145  | 0.508821    | no  |
| Fubp1      | 19.141  | 19.9925 | 0.0627897   | 0.6635   | 0.789533    | no  |
| Fubp3      | 5.27333 | 6.72909 | 0.351695    | 0.04515  | 0.0997989   | no  |
| Fuca1      | 19.0824 | 19.3809 | 0.0223956   | 0.8869   | 0.936623    | no  |
| Fuca2      | 13.1182 | 13.9934 | 0.0931688   | 0.5415   | 0.690792    | no  |
| Fuk        | 2.63554 | 2.94962 | 0.162432    | 0.4158   | 0.574527    | no  |
| Fundc1     | 14.5266 | 15.6323 | 0.105838    | 0.5227   | 0.674551    | no  |
| Fundc2     | 21.079  | 19.1545 | -0.138128   | 0.346    | 0.503015    | no  |
| Furin      | 15.3861 | 18.3792 | 0.256445    | 0.08085  | 0.161998    | no  |
| Fus        | 137.042 | 128.022 | -0.0982187  | 0.48715  | 0.642368    | no  |
| Fut11      | 9.56774 | 9.26864 | -0.0458216  | 0.77055  | 0.864328    | no  |
| Fut7       | 5.58132 | 7.97216 | 0.514363    | 0.00905  | 0.0251275   | yes |
| Fut8       | 33.9818 | 50.324  | 0.566484    | 5.00E-05 | 0.000236281 | yes |
| Fuz        | 9.03085 | 10.1757 | 0.172188    | 0.68835  | 0.80784     | no  |
| Fv1        | 4.22394 | 3.84243 | -0.136571   | 0.5885   | 0.730368    | no  |
| Fxn        | 12.297  | 12.1246 | -0.0203662  | 0.91675  | 0.954324    | no  |
| Fxr1       | 47.0254 | 46.3669 | -0.0203472  | 0.89385  | 0.940655    | no  |
| Fxr2       | 28.4222 | 28.8758 | 0.0228451   | 0.8795   | 0.932505    | no  |
| Fxyd5      | 773.875 | 754.721 | -0.0361571  | 0.80085  | 0.884221    | no  |
| Fxyd7      | 1.20429 | 1.11568 | -0.110258   | 0.8389   | 0.907619    | no  |
| Fyb        | 113.439 | 123.829 | 0.126428    | 0.3734   | 0.532033    | no  |
| Fyco1      | 18.2386 | 24.7304 | 0.439288    | 0.1006   | 0.194222    | no  |
| Fyn        | 298.79  | 230.475 | -0.374525   | 0.0106   | 0.0288545   | yes |
| Fytd1      | 8.48631 | 8.68329 | 0.033105    | 0.83275  | 0.904041    | no  |
| Fzd5       | 2.95273 | 2.57169 | -0.199337   | 0.24605  | 0.391177    | no  |
| Fzr1       | 31.8626 | 28.5387 | -0.158947   | 0.28575  | 0.436111    | no  |
| G0s2       | 4.70258 | 2.65945 | -0.822327   | 0.0143   | 0.0372788   | yes |
| G2e3       | 4.6422  | 3.91225 | -0.246812   | 0.1293   | 0.237966    | no  |
| G3bp1      | 89.3388 | 88.7759 | -0.00911906 | 0.9499   | 0.973004    | no  |
| G3bp2      | 53.0048 | 53.2814 | 0.00750779  | 0.95535  | 0.976122    | no  |
| G6pc3      | 13.3191 | 16.8367 | 0.338111    | 0.04625  | 0.101841    | no  |
| G6pdx      | 26.6641 | 26.947  | 0.015226    | 0.942    | 0.968581    | no  |
| Gaa        | 6.98779 | 9.57214 | 0.454005    | 0.005    | 0.0149735   | yes |
| Gab3       | 15.5545 | 14.8499 | -0.0668744  | 0.67715  | 0.799615    | no  |
| Gabarap    | 215.821 | 196.822 | -0.132945   | 0.34495  | 0.50183     | no  |
| Gabarap1   | 18.891  | 15.986  | -0.24089    | 0.13855  | 0.25085     | no  |
| Gabarap2   | 258.836 | 244.016 | -0.0850674  | 0.54315  | 0.692322    | no  |
| Gabbr1     | 26.4042 | 24.8452 | -0.0877986  | 0.53455  | 0.684984    | no  |
| Gabpa      | 26.7231 | 24.7472 | -0.110818   | 0.58145  | 0.724485    | no  |
| Gabpb1     | 18.0323 | 15.5758 | -0.211276   | 0.19325  | 0.327176    | no  |
| Gabpb2     | 41.3637 | 41.0632 | -0.0105177  | 0.96665  | 0.981911    | no  |
| Gadd45a    | 13.7063 | 11.8673 | -0.207843   | 0.31595  | 0.469937    | no  |
| Gadd45b    | 49.2746 | 48.7822 | -0.0144893  | 0.92315  | 0.958146    | no  |
| Gadd45g    | 28.5747 | 23.3845 | -0.28918    | 0.08765  | 0.173408    | no  |
| Gadd45gip1 | 23.3377 | 25.2254 | 0.112214    | 0.6545   | 0.782849    | no  |
| Gak        | 44.442  | 44.0215 | -0.0137161  | 0.9221   | 0.957746    | no  |
| Galc       | 1.06937 | 1.49863 | 0.486886    | 0.05635  | 0.120393    | no  |
| Gale       | 9.07528 | 9.01902 | -0.00897152 | 0.9647   | 0.9808      | no  |
| Galk1      | 4.90811 | 5.40291 | 0.13857     | 0.5395   | 0.68915     | no  |
| Galk2      | 20.8555 | 19.7074 | -0.0816878  | 0.58215  | 0.72505     | no  |
| Galm       | 2.81615 | 2.87798 | 0.031334    | 0.89205  | 0.939573    | no  |
| Galns      | 7.66773 | 6.96073 | -0.139561   | 0.4331   | 0.591335    | no  |
| Galnt1     | 47.4451 | 51.4948 | 0.118167    | 0.39325  | 0.552344    | no  |



|         |         |          |             |         |           |     |
|---------|---------|----------|-------------|---------|-----------|-----|
| Galnt10 | 29.6269 | 35.6836  | 0.268355    | 0.0576  | 0.1226    | no  |
| Galnt11 | 8.00045 | 9.20868  | 0.202914    | 0.2362  | 0.380697  | no  |
| Galnt12 | 18.4966 | 19.002   | 0.0388933   | 0.79985 | 0.883587  | no  |
| Galnt2  | 40.1089 | 40.524   | 0.0148566   | 0.91375 | 0.952775  | no  |
| Galnt3  | 12.0027 | 9.06777  | -0.404538   | 0.01095 | 0.0296791 | yes |
| Galnt4  | 4.71827 | 4.43806  | -0.0883272  | 0.6722  | 0.795941  | no  |
| Galnt6  | 35.519  | 38.644   | 0.121654    | 0.38935 | 0.548503  | no  |
| Galnt7  | 19.7806 | 18.8355  | -0.0706299  | 0.625   | 0.759783  | no  |
| Galr3   | 3.06267 | 4.29139  | 0.486657    | 0.1773  | 0.305574  | no  |
| Galt    | 14.6155 | 14.4674  | -0.0146913  | 0.92725 | 0.960312  | no  |
| Gan     | 1.82553 | 1.74597  | -0.0642857  | 0.79605 | 0.881265  | no  |
| Ganab   | 80.4365 | 80.8506  | 0.00740838  | 0.9556  | 0.976279  | no  |
| Ganc    | 7.99801 | 7.86624  | -0.023967   | 0.92545 | 0.959306  | no  |
| Gapdh   | 562.568 | 534.472  | -0.0739119  | 0.60755 | 0.745733  | no  |
| Gapvd1  | 21.1234 | 21.4881  | 0.0246991   | 0.86155 | 0.921781  | no  |
| Gar1    | 19.7451 | 21.1073  | 0.0962482   | 0.56605 | 0.711425  | no  |
| Gars    | 98.02   | 88.4387  | -0.148398   | 0.28795 | 0.438577  | no  |
| Gart    | 17.2488 | 21.3628  | 0.308599    | 0.03765 | 0.0855023 | no  |
| Gas2l1  | 1.15716 | 0.387623 | -1.57786    | 0.00045 | 0.0017621 | yes |
| Gas7    | 3.10153 | 3.40027  | 0.132669    | 0.43355 | 0.591789  | no  |
| Gas8    | 3.10635 | 3.622    | 0.221565    | 0.37325 | 0.531884  | no  |
| Gata3   | 16.7055 | 21.9728  | 0.39539     | 0.009   | 0.0250025 | yes |
| Gatad1  | 17.1277 | 17.5372  | 0.0340891   | 0.8209  | 0.896777  | no  |
| Gatad2a | 37.5244 | 39.0056  | 0.0558521   | 0.6877  | 0.807305  | no  |
| Gatad2b | 22.2376 | 23.1645  | 0.0589176   | 0.6992  | 0.815516  | no  |
| Gatc    | 9.09809 | 8.868    | -0.0369551  | 0.8452  | 0.91164   | no  |
| Gatsl2  | 1.12607 | 1.16973  | 0.0548796   | 0.8194  | 0.895929  | no  |
| Gatsl3  | 10.8633 | 10.0011  | -0.119301   | 0.51815 | 0.670579  | no  |
| Gba     | 49.0018 | 46.4471  | -0.0772458  | 0.59455 | 0.735355  | no  |
| Gba2    | 24.5965 | 22.8128  | -0.108608   | 0.6383  | 0.770352  | no  |
| Gbas    | 10.728  | 9.52397  | -0.171742   | 0.323   | 0.478005  | no  |
| Gbe1    | 2.93844 | 3.86126  | 0.394023    | 0.05295 | 0.114106  | no  |
| Gbf1    | 17.3845 | 18.0434  | 0.0536701   | 0.7132  | 0.82519   | no  |
| Gbp2    | 44.0442 | 36.9009  | -0.255296   | 0.0748  | 0.151807  | no  |
| Gbp3    | 29.6348 | 25.4667  | -0.21868    | 0.1335  | 0.2442    | no  |
| Gbp4    | 42.9918 | 41.0245  | -0.0675732  | 0.6349  | 0.767706  | no  |
| Gbp5    | 13.2848 | 12.8964  | -0.0428027  | 0.78655 | 0.875057  | no  |
| Gbp6    | 6.53979 | 5.6898   | -0.200866   | 0.2233  | 0.365378  | no  |
| Gbp7    | 38.7263 | 36.0579  | -0.102998   | 0.4631  | 0.620226  | no  |
| Gbp8    | 41.0915 | 40.9663  | -0.00439983 | 0.97655 | 0.98701   | no  |
| Gbp9    | 21.9029 | 23.0158  | 0.0715032   | 0.6239  | 0.758877  | no  |
| Gcat    | 4.46439 | 5.42765  | 0.281862    | 0.2341  | 0.378106  | no  |
| Gcc1    | 12.7142 | 12.2266  | -0.0564165  | 0.7134  | 0.825368  | no  |
| Gcc2    | 8.98237 | 8.7433   | -0.0389182  | 0.7966  | 0.881556  | no  |
| Gcdh    | 15.1859 | 16.0194  | 0.07709     | 0.65315 | 0.781937  | no  |
| Gcfc2   | 3.73103 | 3.44464  | -0.115219   | 0.71895 | 0.829003  | no  |
| Gch1    | 3.18209 | 3.44122  | 0.112943    | 0.5813  | 0.724349  | no  |
| Gclc    | 20.4244 | 19.5586  | -0.0624903  | 0.67285 | 0.79639   | no  |
| Gclm    | 14.2232 | 17.4544  | 0.29534     | 0.06785 | 0.140094  | no  |
| Gcn1l1  | 17.1955 | 19.3234  | 0.168323    | 0.23695 | 0.381574  | no  |
| Gcnt1   | 1.22342 | 1.85962  | 0.604083    | 0.00785 | 0.0221974 | yes |
| Gcsh    | 8.74832 | 11.2816  | 0.366894    | 0.06065 | 0.127942  | no  |
| Gdap2   | 15.3287 | 13.8855  | -0.14266    | 0.35585 | 0.513611  | no  |
| Gde1    | 29.121  | 31.7643  | 0.125345    | 0.4139  | 0.57272   | no  |
| Gdf11   | 13.007  | 14.2887  | 0.135586    | 0.4212  | 0.579628  | no  |
| Gdi1    | 88.5986 | 87.7773  | -0.0134365  | 0.92105 | 0.957064  | no  |
| Gdi2    | 151.662 | 141.721  | -0.0978121  | 0.5375  | 0.687541  | no  |

|        |         |         |             |          |             |     |
|--------|---------|---------|-------------|----------|-------------|-----|
| Gdpd3  | 1.37084 | 33.1231 | 4.59471     | 5.00E-05 | 0.000236281 | yes |
| Gdpd5  | 2.537   | 2.25673 | -0.168886   | 0.4196   | 0.578114    | no  |
| Gdpgp1 | 2.72287 | 2.93782 | 0.109621    | 0.58325  | 0.72601     | no  |
| Gem    | 24.4998 | 19.2156 | -0.350491   | 0.0222   | 0.0546175   | no  |
| Gemin2 | 16.3422 | 16.6486 | 0.0268027   | 0.88255  | 0.934265    | no  |
| Gemin4 | 3.93497 | 3.94433 | 0.00342731  | 0.98195  | 0.989605    | no  |
| Gemin5 | 6.94907 | 8.279   | 0.252638    | 0.09815  | 0.190429    | no  |
| Gemin6 | 3.97278 | 3.52126 | -0.17406    | 0.5316   | 0.682344    | no  |
| Gemin7 | 55.7734 | 52.9267 | -0.0755808  | 0.6434   | 0.774217    | no  |
| Gemin8 | 2.8159  | 3.40339 | 0.273375    | 0.26445  | 0.411214    | no  |
| Gen1   | 3.18722 | 2.15775 | -0.562766   | 0.009    | 0.0250025   | yes |
| Get4   | 27.2506 | 23.9486 | -0.186341   | 0.21115  | 0.350577    | no  |
| Gfer   | 6.90129 | 6.2816  | -0.135733   | 0.48825  | 0.643302    | no  |
| Gfi1   | 16.4058 | 13.9932 | -0.229479   | 0.13415  | 0.245135    | no  |
| Gfm1   | 19.7743 | 20.1617 | 0.0279957   | 0.8731   | 0.928702    | no  |
| Gfm2   | 13.1283 | 13.6547 | 0.0567156   | 0.8294   | 0.902042    | no  |
| Gfod1  | 8.84889 | 8.53604 | -0.0519296  | 0.72585  | 0.833799    | no  |
| Gfod2  | 1.10267 | 2.34209 | 1.08679     | 5.00E-04 | 0.00193907  | yes |
| Gfpt1  | 19.365  | 17.4741 | -0.148227   | 0.30185  | 0.454414    | no  |
| Gga1   | 44.1574 | 44.7811 | 0.0202319   | 0.8866   | 0.936446    | no  |
| Gga2   | 1.61068 | 1.68719 | 0.0669516   | 0.75385  | 0.852929    | no  |
| Gga3   | 13.8191 | 12.6779 | -0.124358   | 0.41025  | 0.56921     | no  |
| Ggact  | 13.9954 | 17.0368 | 0.283697    | 0.1299   | 0.23889     | no  |
| Ggct   | 21.3555 | 20.7208 | -0.0435296  | 0.7959   | 0.88114     | no  |
| Ggcx   | 5.43196 | 5.57111 | 0.0364919   | 0.83585  | 0.905916    | no  |
| Ggh    | 44.3602 | 36.4921 | -0.281682   | 0.0663   | 0.137425    | no  |
| Ggnbp2 | 70.2976 | 72.435  | 0.0432101   | 0.75945  | 0.856929    | no  |
| Ggps1  | 12.7845 | 12.7058 | -0.00890142 | 0.95515  | 0.976045    | no  |
| Ggt1   | 20.7994 | 48.3249 | 1.21622     | 5.00E-05 | 0.000236281 | yes |
| Ggta1  | 13.4214 | 13.0611 | -0.0392564  | 0.79915  | 0.883228    | no  |
| Ghdc   | 5.46503 | 4.35638 | -0.3271     | 0.10085  | 0.194608    | no  |
| Ghitm  | 70.1235 | 67.6884 | -0.0509891  | 0.72015  | 0.829966    | no  |
| Gid4   | 5.69611 | 7.02124 | 0.30175     | 0.06705  | 0.138698    | no  |
| Gid8   | 20.5844 | 20.2208 | -0.0257094  | 0.86085  | 0.921424    | no  |
| Gigyf1 | 17.7777 | 20.8043 | 0.22681     | 0.1126   | 0.212882    | no  |
| Gigyf2 | 16.6256 | 16.9892 | 0.0312102   | 0.8273   | 0.900841    | no  |
| Gimap1 | 221.767 | 191.976 | -0.208123   | 0.14075  | 0.254129    | no  |
| Gimap3 | 463.292 | 426.308 | -0.120026   | 0.4146   | 0.573374    | no  |
| Gimap4 | 963.467 | 841.265 | -0.195674   | 0.2232   | 0.365266    | no  |
| Gimap5 | 74.2688 | 68.2578 | -0.121762   | 0.3926   | 0.551749    | no  |
| Gimap6 | 488.226 | 464.851 | -0.0707808  | 0.61505  | 0.752026    | no  |
| Gimap7 | 203.221 | 152.653 | -0.412792   | 0.0029   | 0.00927196  | yes |
| Gimap8 | 151.499 | 141.481 | -0.0986963  | 0.4929   | 0.647651    | no  |
| Gimap9 | 104.503 | 91.2355 | -0.19587    | 0.16485  | 0.288492    | no  |
| Gin1   | 6.63455 | 5.94288 | -0.158836   | 0.4021   | 0.561123    | no  |
| Ginm1  | 16.7927 | 18.1921 | 0.115475    | 0.49015  | 0.645155    | no  |
| Gins1  | 5.9842  | 4.30147 | -0.476329   | 0.114    | 0.215097    | no  |
| Gins2  | 9.65064 | 5.71261 | -0.756474   | 0.22655  | 0.369386    | no  |
| Gins3  | 6.1451  | 4.84387 | -0.343276   | 0.0714   | 0.146205    | no  |
| Gins4  | 28.8057 | 28.2335 | -0.0289461  | 0.85595  | 0.918337    | no  |
| Gipc1  | 16.7    | 16.7978 | 0.00841698  | 0.96275  | 0.980023    | no  |
| Git1   | 19.4177 | 19.1644 | -0.0189423  | 0.89915  | 0.944177    | no  |
| Git2   | 35.8615 | 37.1546 | 0.0511053   | 0.7155   | 0.826713    | no  |
| Gkap1  | 1.74785 | 1.39099 | -0.329472   | 0.3213   | 0.476208    | no  |
| Gla    | 3.52887 | 3.30029 | -0.0966136  | 0.6334   | 0.766483    | no  |
| Glb1   | 15.9166 | 14.3969 | -0.14478    | 0.48065  | 0.636353    | no  |
| Glb1l  | 4.24631 | 4.33755 | 0.0306675   | 0.91905  | 0.955816    | no  |

|          |         |          |            |          |             |     |
|----------|---------|----------|------------|----------|-------------|-----|
| Glcci1   | 9.32368 | 7.88399  | -0.241973  | 0.10955  | 0.208327    | no  |
| Glce     | 1.18818 | 1.21226  | 0.0289466  | 0.9023   | 0.946077    | no  |
| Gle1     | 22.397  | 21.2187  | -0.0779675 | 0.59555  | 0.736102    | no  |
| Glg1     | 34.082  | 37.6615  | 0.144082   | 0.31135  | 0.464976    | no  |
| Glipr1   | 141.179 | 145.284  | 0.0413528  | 0.80815  | 0.888874    | no  |
| Glipr2   | 216.142 | 235.625  | 0.124515   | 0.38275  | 0.541855    | no  |
| Glmn     | 9.02115 | 7.70826  | -0.226905  | 0.42245  | 0.580839    | no  |
| Glo1     | 40.6498 | 43.3785  | 0.0937296  | 0.57395  | 0.718043    | no  |
| Glod4    | 24.5184 | 22.6084  | -0.117004  | 0.44095  | 0.598867    | no  |
| Glrx     | 76.9162 | 71.5301  | -0.104737  | 0.47715  | 0.633216    | no  |
| Glrx2    | 7.57573 | 7.28839  | -0.0557837 | 0.7312   | 0.837573    | no  |
| Glrx3    | 23.6029 | 23.1897  | -0.0254791 | 0.91715  | 0.954586    | no  |
| Glrx5    | 52.4752 | 55.6426  | 0.084554   | 0.58675  | 0.728863    | no  |
| Gls      | 42.8826 | 42.2393  | -0.021806  | 0.8809   | 0.933247    | no  |
| Glt25d1  | 22.2689 | 24.0808  | 0.112854   | 0.4348   | 0.592934    | no  |
| Glt8d1   | 6.47311 | 5.60848  | -0.206848  | 0.65665  | 0.784357    | no  |
| Gltp     | 99.285  | 86.9161  | -0.191952  | 0.17655  | 0.30452     | no  |
| Gltpd1   | 4.12807 | 3.65303  | -0.176374  | 0.373    | 0.531667    | no  |
| Gltscr1  | 17.2384 | 20.3061  | 0.236287   | 0.09905  | 0.191827    | no  |
| Gltscr1l | 21.6325 | 20.8409  | -0.0537833 | 0.70685  | 0.820871    | no  |
| Gltscr2  | 406.825 | 389.412  | -0.0631092 | 0.6517   | 0.780744    | no  |
| Glud1    | 117.319 | 123.368  | 0.0725314  | 0.6147   | 0.751702    | no  |
| Glul     | 40.9883 | 36.7979  | -0.15559   | 0.275    | 0.423782    | no  |
| Glyctk   | 4.66602 | 4.6911   | 0.0077317  | 0.96355  | 0.980356    | no  |
| Glyr1    | 59.5757 | 57.5524  | -0.0498494 | 0.72855  | 0.835527    | no  |
| Gm10094  | 156.661 | 150.159  | -0.0611484 | 0.70855  | 0.82202     | no  |
| Gm10767  | 1.45081 | 0.879846 | -0.721537  | 0.05075  | 0.110149    | no  |
| Gm11127  | 1.62046 | 1.57145  | -0.0442998 | 0.90525  | 0.947805    | no  |
| Gm12250  | 5.80907 | 6.53481  | 0.169838   | 0.3432   | 0.499974    | no  |
| Gm12657  | 1.06568 | 1.20561  | 0.177985   | 0.71     | 0.823039    | no  |
| Gm12942  | 6.36371 | 6.39337  | 0.00670752 | 0.98005  | 0.988636    | no  |
| Gm13051  | 1.13993 | 1.55649  | 0.449359   | 0.10285  | 0.197803    | no  |
| Gm13139  | 4.53322 | 4.09705  | -0.145951  | 0.5451   | 0.693742    | no  |
| Gm13157  | 19.067  | 18.8889  | -0.0135432 | 0.92825  | 0.960812    | no  |
| Gm13212  | 6.45379 | 7.52172  | 0.220917   | 0.2633   | 0.409805    | no  |
| Gm13251  | 1.94095 | 2.17295  | 0.16289    | 0.45465  | 0.612395    | no  |
| Gm13826  | 2.46614 | 1.6517   | -0.5783    | 0.2008   | 0.337104    | no  |
| Gm14295  | 20.8678 | 19.063   | -0.130502  | 0.44495  | 0.602665    | no  |
| Gm14325  | 2.16493 | 2.53983  | 0.230412   | 0.2499   | 0.395392    | no  |
| Gm14326  | 4.54469 | 4.38916  | -0.0502381 | 0.85895  | 0.920102    | no  |
| Gm14378  | 2.34115 | 2.43551  | 0.0570035  | 0.86435  | 0.923447    | no  |
| Gm14420  | 2.17078 | 2.22123  | 0.0331475  | 0.8652   | 0.92402     | no  |
| Gm14446  | 26.4761 | 14.3523  | -0.883405  | 5.00E-05 | 0.000236281 | yes |
| Gm15800  | 11.166  | 12.1948  | 0.127149   | 0.3702   | 0.528786    | no  |
| Gm16515  | 8.26148 | 7.86071  | -0.0717413 | 0.6506   | 0.77981     | no  |
| Gm166    | 8.60455 | 8.10386  | -0.08649   | 0.72645  | 0.834312    | no  |
| Gm17296  | 2.23351 | 2.28901  | 0.0354115  | 0.8523   | 0.916023    | no  |
| Gm1966   | 36.9224 | 39.0478  | 0.0807455  | 0.57285  | 0.717099    | no  |
| Gm20604  | 3.23845 | 2.89378  | -0.162351  | 0.64935  | 0.778814    | no  |
| Gm2382   | 26.3533 | 22.3453  | -0.238011  | 0.1991   | 0.334983    | no  |
| Gm2a     | 41.4425 | 48.0325  | 0.212897   | 0.1296   | 0.238413    | no  |
| Gm4070   | 1.69577 | 1.65069  | -0.0388763 | 0.85855  | 0.92005     | no  |
| Gm4944   | 2.90157 | 3.59348  | 0.308549   | 0.08875  | 0.175197    | no  |
| Gm5141   | 1.38524 | 1.49836  | 0.113243   | 0.657    | 0.784616    | no  |
| Gm5148   | 1.73765 | 1.96543  | 0.177712   | 0.60505  | 0.743793    | no  |
| Gm527    | 1.18087 | 0.793436 | -0.573667  | 0.15795  | 0.278704    | no  |
| Gm561    | 23.5463 | 24.9856  | 0.085594   | 0.71185  | 0.824263    | no  |

|         |          |          |            |          |            |     |
|---------|----------|----------|------------|----------|------------|-----|
| Gm5617  | 7.99467  | 7.49539  | -0.0930358 | 0.73635  | 0.841301   | no  |
| Gm5741  | 0.707345 | 1.15668  | 0.709502   | 0.57905  | 0.722438   | no  |
| Gm5901  | 1.96743  | 3.37268  | 0.777579   | 0.56685  | 0.712038   | no  |
| Gm608   | 6.92006  | 6.50122  | -0.0900744 | 0.53635  | 0.686568   | no  |
| Gm614   | 14.6745  | 13.4581  | -0.124833  | 0.5605   | 0.706804   | no  |
| Gm6904  | 4.94358  | 3.09139  | -0.677301  | 0.0254   | 0.0613714  | no  |
| Gm7102  | 3.42232  | 2.68718  | -0.348882  | 0.17285  | 0.299433   | no  |
| Gm7120  | 3.17384  | 3.40843  | 0.102876   | 0.7479   | 0.849109   | no  |
| Gm7609  | 2.04722  | 1.10271  | -0.89261   | 0.00985  | 0.0270919  | yes |
| Gm8369  | 20.9159  | 22.7359  | 0.120372   | 0.4698   | 0.62643    | no  |
| Gm8817  | 8.4162   | 6.95318  | -0.275495  | 0.3517   | 0.509047   | no  |
| Gmcl1   | 16.8769  | 17.2639  | 0.0327103  | 0.8301   | 0.902483   | no  |
| Gmcls   | 13.1725  | 11.9911  | -0.135574  | 0.4436   | 0.601367   | no  |
| Gmeb1   | 7.31657  | 6.67982  | -0.131359  | 0.3911   | 0.550167   | no  |
| Gmeb2   | 14.959   | 14.1741  | -0.0777605 | 0.60325  | 0.742382   | no  |
| Gmfb    | 29.5499  | 31.0651  | 0.0721412  | 0.61535  | 0.752315   | no  |
| Gmfg    | 435.995  | 420.713  | -0.0514732 | 0.71935  | 0.829342   | no  |
| Gmip    | 51.7273  | 53.8469  | 0.0579366  | 0.6823   | 0.803398   | no  |
| Gmnn    | 37.9489  | 24.0724  | -0.65668   | 3.00E-04 | 0.00122185 | yes |
| Gmppa   | 30.0164  | 30.8498  | 0.0395104  | 0.7926   | 0.878976   | no  |
| Gmppb   | 10.3238  | 10.5819  | 0.0356322  | 0.94015  | 0.967637   | no  |
| Gmpr2   | 25.893   | 22.5211  | -0.201288  | 0.2063   | 0.344193   | no  |
| Gmps    | 17.0684  | 15.9102  | -0.101374  | 0.48085  | 0.636546   | no  |
| Gna11   | 11.6768  | 12.1222  | 0.0539958  | 0.7255   | 0.8336     | no  |
| Gna12   | 7.69118  | 9.26168  | 0.268069   | 0.14155  | 0.255188   | no  |
| Gna13   | 43.2995  | 44.8477  | 0.0506824  | 0.7136   | 0.825504   | no  |
| Gna15   | 51.2025  | 62.5558  | 0.288928   | 0.0432   | 0.0961207  | no  |
| Gnai2   | 463.466  | 434.311  | -0.0937364 | 0.522    | 0.673993   | no  |
| Gnai3   | 98.3006  | 90.9456  | -0.112197  | 0.43185  | 0.590074   | no  |
| Gnal    | 5.58166  | 6.28552  | 0.171338   | 0.6534   | 0.78213    | no  |
| Gnaq    | 1.33641  | 1.39338  | 0.0602267  | 0.78405  | 0.873405   | no  |
| Gnas    | 463.015  | 422.143  | -0.133328  | 0.3603   | 0.518359   | no  |
| Gnb1    | 100.606  | 95.0686  | -0.0816736 | 0.5647   | 0.710349   | no  |
| Gnb1l   | 2.48187  | 2.58422  | 0.0583049  | 0.7779   | 0.869229   | no  |
| Gnb2    | 273.851  | 274.509  | 0.00346183 | 0.98075  | 0.988975   | no  |
| Gnb2l1  | 1713.55  | 1690.34  | -0.0196722 | 0.898    | 0.943447   | no  |
| Gnb4    | 2.40593  | 2.37812  | -0.0167742 | 0.9437   | 0.969552   | no  |
| Gne     | 12.2148  | 13.6726  | 0.162654   | 0.3122   | 0.465851   | no  |
| Gng10   | 79.6834  | 69.1303  | -0.204962  | 0.162    | 0.284442   | no  |
| Gng12   | 1.1459   | 0.979632 | -0.226168  | 0.3709   | 0.529486   | no  |
| Gng2    | 64.3802  | 65.7282  | 0.0298964  | 0.8326   | 0.903961   | no  |
| Gng3    | 1.15657  | 1.03865  | -0.155141  | 0.8996   | 0.944435   | no  |
| Gng5    | 241.519  | 203.552  | -0.246739  | 0.09465  | 0.184725   | no  |
| Gngt2   | 13.6725  | 10.5981  | -0.36747   | 0.42695  | 0.585361   | no  |
| Gnl1    | 16.9231  | 17.5207  | 0.0500673  | 0.74805  | 0.849252   | no  |
| Gnl2    | 23.9643  | 26.7694  | 0.159695   | 0.2843   | 0.434499   | no  |
| Gnl3    | 13.1826  | 13.9177  | 0.0782941  | 0.80005  | 0.883697   | no  |
| Gnl3l   | 11.1377  | 11.8835  | 0.0935037  | 0.5417   | 0.690935   | no  |
| Gnpat   | 35.3036  | 36.847   | 0.0617324  | 0.66835  | 0.793098   | no  |
| Gnpda1  | 34.1946  | 26.2668  | -0.38053   | 0.01105  | 0.0299157  | yes |
| Gnpda2  | 21.565   | 19.8358  | -0.120585  | 0.44745  | 0.604855   | no  |
| Gnpnat1 | 9.65507  | 10.9136  | 0.176772   | 0.50035  | 0.65454    | no  |
| Gnptab  | 50.2273  | 43.0753  | -0.221611  | 0.1176   | 0.220627   | no  |
| Gnptg   | 76.9156  | 75.2972  | -0.03068   | 0.8884   | 0.937435   | no  |
| Gnrh1   | 3.96145  | 3.37134  | -0.232704  | 0.56765  | 0.712662   | no  |
| Gns     | 16.2808  | 15.047   | -0.113697  | 0.4471   | 0.604612   | no  |
| Golga1  | 5.96669  | 5.18341  | -0.203029  | 0.2189   | 0.359931   | no  |

|          |         |         |             |          |             |     |
|----------|---------|---------|-------------|----------|-------------|-----|
| Golga2   | 23.2995 | 22.8664 | -0.0270644  | 0.84885  | 0.913762    | no  |
| Golga3   | 16.1687 | 16.1741 | 0.000476155 | 0.9985   | 0.998741    | no  |
| Golga4   | 18.1024 | 18.9699 | 0.0675341   | 0.633    | 0.766183    | no  |
| Golga5   | 27.4359 | 26.7831 | -0.0347373  | 0.81135  | 0.890853    | no  |
| Golga7   | 62.0222 | 69.9564 | 0.173671    | 0.22295  | 0.364907    | no  |
| Golgb1   | 12.1976 | 13.4438 | 0.140337    | 0.3277   | 0.483238    | no  |
| Golim4   | 18.8518 | 14.1402 | -0.414903   | 0.00455  | 0.0137968   | yes |
| Golm1    | 71.719  | 66.4068 | -0.111024   | 0.4319   | 0.590085    | no  |
| Golph3   | 55.0469 | 52.162  | -0.0776644  | 0.58465  | 0.72715     | no  |
| Golph3l  | 11.8863 | 9.16702 | -0.374781   | 0.02255  | 0.055332    | no  |
| Golt1b   | 12.6436 | 10.5355 | -0.263148   | 0.1022   | 0.196772    | no  |
| Gon4l    | 13.0089 | 12.7151 | -0.0329614  | 0.836    | 0.906023    | no  |
| Gopc     | 16.5981 | 16.7331 | 0.0116806   | 0.9383   | 0.966678    | no  |
| Gorab    | 3.99123 | 3.95274 | -0.0139801  | 0.9447   | 0.970043    | no  |
| Gorasp1  | 4.56053 | 3.99939 | -0.18942    | 0.5914   | 0.732653    | no  |
| Gorasp2  | 46.0793 | 44.7768 | -0.041369   | 0.7686   | 0.862963    | no  |
| Gosr1    | 29.1809 | 26.3074 | -0.149555   | 0.29515  | 0.446671    | no  |
| Gosr2    | 61.077  | 58.1057 | -0.0719501  | 0.6049   | 0.743661    | no  |
| Got1     | 18.5124 | 16.7741 | -0.14225    | 0.3653   | 0.523642    | no  |
| Got2     | 60.4687 | 55.9197 | -0.112832   | 0.42315  | 0.581541    | no  |
| Gp49a    | 16.0416 | 18.6081 | 0.214112    | 0.21195  | 0.35155     | no  |
| Gpaa1    | 21.7503 | 20.4927 | -0.0859282  | 0.57505  | 0.718986    | no  |
| Gpalpp1  | 13.5943 | 12.7195 | -0.0959556  | 0.5096   | 0.662979    | no  |
| Gpam     | 3.31765 | 3.16196 | -0.069344   | 0.71345  | 0.825398    | no  |
| Gpank1   | 28.16   | 27.3062 | -0.0444146  | 0.7805   | 0.870921    | no  |
| Gpatch1  | 7.29447 | 7.21784 | -0.015236   | 0.9289   | 0.96116     | no  |
| Gpatch11 | 9.00274 | 9.06801 | 0.0104221   | 0.9458   | 0.970594    | no  |
| Gpatch2  | 6.29888 | 6.88572 | 0.128511    | 0.434    | 0.592277    | no  |
| Gpatch2l | 18.5435 | 17.3263 | -0.0979467  | 0.50405  | 0.658124    | no  |
| Gpatch3  | 5.71278 | 6.23356 | 0.125864    | 0.5188   | 0.671125    | no  |
| Gpatch4  | 8.70539 | 10.4865 | 0.268548    | 0.14575  | 0.261014    | no  |
| Gpatch8  | 11.3071 | 11.6016 | 0.0370947   | 0.795    | 0.880586    | no  |
| Gpbp1    | 56.3624 | 56.5798 | 0.00555348  | 0.96635  | 0.981677    | no  |
| Gpbp1l1  | 45.4001 | 48.442  | 0.0935639   | 0.51525  | 0.668051    | no  |
| Gpc1     | 6.94143 | 6.91979 | -0.00450574 | 0.97825  | 0.987837    | no  |
| Gpcpd1   | 40.0853 | 39.5732 | -0.0185506  | 0.895    | 0.941402    | no  |
| Gpd1l    | 25.516  | 26.5549 | 0.0575744   | 0.6887   | 0.808063    | no  |
| Gpd2     | 10.3355 | 6.67523 | -0.630715   | 5.00E-05 | 0.000236281 | yes |
| Gphn     | 5.89258 | 5.8296  | -0.0155018  | 0.9294   | 0.961424    | no  |
| Gpi1     | 211.184 | 218.133 | 0.0467051   | 0.75155  | 0.851514    | no  |
| Gpkow    | 19.1588 | 17.5358 | -0.127706   | 0.38615  | 0.545148    | no  |
| Gpld1    | 6.76774 | 6.90812 | 0.0296179   | 0.85525  | 0.917949    | no  |
| Gpn1     | 13.7813 | 13.9803 | 0.0206859   | 0.8986   | 0.943838    | no  |
| Gpn2     | 15.5577 | 16.5373 | 0.0880913   | 0.603    | 0.742191    | no  |
| Gpn3     | 26.3771 | 29.2851 | 0.150884    | 0.342    | 0.498607    | no  |
| Gpr107   | 15.0312 | 15.3403 | 0.0293656   | 0.8458   | 0.911855    | no  |
| Gpr108   | 38.641  | 36.7189 | -0.073612   | 0.61055  | 0.748131    | no  |
| Gpr114   | 39.0262 | 25.9358 | -0.589501   | 5.00E-05 | 0.000236281 | yes |
| Gpr132   | 72.4046 | 77.2659 | 0.0937502   | 0.5072   | 0.660867    | no  |
| Gpr137   | 8.51271 | 8.19925 | -0.0541264  | 0.8471   | 0.912671    | no  |
| Gpr146   | 6.74996 | 8.41064 | 0.317337    | 0.0489   | 0.106734    | no  |
| Gpr15    | 1.95929 | 3.09165 | 0.658051    | 0.0308   | 0.072142    | no  |
| Gpr155   | 2.01507 | 1.77276 | -0.184833   | 0.35965  | 0.517624    | no  |
| Gpr160   | 11.312  | 12.3717 | 0.129181    | 0.44855  | 0.605948    | no  |
| Gpr171   | 44.5721 | 38.3621 | -0.216458   | 0.2367   | 0.381311    | no  |
| Gpr174   | 22.5792 | 20.636  | -0.129831   | 0.35975  | 0.517737    | no  |
| Gpr18    | 42.1592 | 42.1619 | 9.27E-05    | 0.99885  | 0.99902     | no  |

|         |          |          |             |          |             |     |
|---------|----------|----------|-------------|----------|-------------|-----|
| Gpr180  | 8.23437  | 9.2376   | 0.165861    | 0.3164   | 0.470477    | no  |
| Gpr183  | 17.9814  | 30.6775  | 0.770676    | 0.0047   | 0.0141816   | yes |
| Gpr19   | 2.20609  | 1.95443  | -0.174742   | 0.5246   | 0.676249    | no  |
| Gpr55   | 8.88449  | 6.61145  | -0.426321   | 0.01645  | 0.0420542   | yes |
| Gpr65   | 20.5142  | 19.8971  | -0.044066   | 0.77535  | 0.867547    | no  |
| Gpr68   | 38.927   | 43.0348  | 0.144731    | 0.31915  | 0.473658    | no  |
| Gpr89   | 13.6268  | 13.4944  | -0.0140839  | 0.9358   | 0.965116    | no  |
| Gprasp1 | 3.29528  | 3.63163  | 0.140216    | 0.5316   | 0.682344    | no  |
| Gprin3  | 9.58931  | 11.2027  | 0.224342    | 0.1652   | 0.288997    | no  |
| Gps1    | 38.8569  | 34.7223  | -0.162307   | 0.2756   | 0.424465    | no  |
| Gps2    | 93.0958  | 87.1622  | -0.0950142  | 0.4987   | 0.652962    | no  |
| Gpsm1   | 5.85206  | 5.60515  | -0.0621936  | 0.7975   | 0.882095    | no  |
| Gpsm2   | 9.03618  | 6.24881  | -0.532132   | 0.03175  | 0.0740403   | no  |
| Gpsm3   | 171.738  | 161.663  | -0.0872167  | 0.53175  | 0.682412    | no  |
| Gpt     | 3.31937  | 2.90559  | -0.192076   | 0.44165  | 0.599518    | no  |
| Gpx1    | 86.4662  | 92.8653  | 0.103003    | 0.48115  | 0.636847    | no  |
| Gpx4    | 105.611  | 111.053  | 0.072494    | 0.6186   | 0.754811    | no  |
| Gpx8    | 9.18531  | 2.03432  | -2.17478    | 5.00E-05 | 0.000236281 | yes |
| Gramd1a | 210.181  | 226.202  | 0.10598     | 0.46105  | 0.618172    | no  |
| Gramd1b | 34.7903  | 36.5273  | 0.0702889   | 0.62595  | 0.760532    | no  |
| Gramd1c | 1.68738  | 1.9668   | 0.221061    | 0.3363   | 0.492433    | no  |
| Gramd3  | 147.743  | 147.623  | -0.00116356 | 0.9932   | 0.995754    | no  |
| Gramd4  | 45.9151  | 51.8424  | 0.175164    | 0.21465  | 0.354869    | no  |
| Grap    | 187.455  | 198.205  | 0.0804492   | 0.56425  | 0.70996     | no  |
| Grap2   | 119.541  | 109.873  | -0.121669   | 0.40265  | 0.561635    | no  |
| Grasp   | 5.12996  | 4.91775  | -0.0609483  | 0.77155  | 0.865023    | no  |
| Grb2    | 104.672  | 104.883  | 0.00289605  | 0.98405  | 0.990703    | no  |
| Grb7    | 0.953991 | 1.6372   | 0.779182    | 0.01185  | 0.031749    | yes |
| Grcc10  | 219.213  | 226.422  | 0.0466786   | 0.7545   | 0.853431    | no  |
| Grhpr   | 9.2927   | 10.2748  | 0.144935    | 0.4647   | 0.621755    | no  |
| Grifin  | 0.460441 | 1.16973  | 1.34508     | 0.13405  | 0.244984    | no  |
| Grik5   | 1.27899  | 1.98857  | 0.636721    | 0.00835  | 0.0234077   | yes |
| Grina   | 56.2307  | 52.4722  | -0.099806   | 0.49075  | 0.645619    | no  |
| Gripap1 | 34.756   | 34.6212  | -0.00560425 | 0.96745  | 0.982271    | no  |
| Grk4    | 1.45104  | 1.53605  | 0.0821341   | 0.7557   | 0.854227    | no  |
| Grk5    | 1.78864  | 1.19278  | -0.584538   | 0.02505  | 0.06064     | no  |
| Grk6    | 139.288  | 149.64   | 0.103424    | 0.4733   | 0.629752    | no  |
| Grn     | 6.75067  | 6.0285   | -0.163232   | 0.3739   | 0.532595    | no  |
| Grpel1  | 17.4559  | 17.797   | 0.0279219   | 0.87665  | 0.930896    | no  |
| Grpel2  | 6.7068   | 7.25005  | 0.112366    | 0.4881   | 0.6432      | no  |
| Grsf1   | 24.6133  | 23.5148  | -0.0658661  | 0.65995  | 0.78702     | no  |
| Grwd1   | 7.21144  | 8.75727  | 0.280193    | 0.13345  | 0.244127    | no  |
| Gsap    | 34.0703  | 22.2718  | -0.613294   | 5.00E-05 | 0.000236281 | yes |
| Gsdmd   | 38.1795  | 35.6698  | -0.0980976  | 0.51385  | 0.666738    | no  |
| Gse1    | 14.0059  | 15.7859  | 0.172595    | 0.2406   | 0.385698    | no  |
| Gsg2    | 10.9967  | 7.90146  | -0.476885   | 0.0086   | 0.0240265   | yes |
| Gsk3a   | 82.5386  | 81.3495  | -0.0209354  | 0.8907   | 0.938768    | no  |
| Gsk3b   | 17.3732  | 16.5619  | -0.0689958  | 0.6234   | 0.758543    | no  |
| Gskip   | 13.1073  | 12.1516  | -0.109232   | 0.48635  | 0.641553    | no  |
| Gsn     | 21.3241  | 25.5166  | 0.258951    | 0.0776   | 0.156638    | no  |
| Gspt1   | 18.0801  | 17.5111  | -0.0461275  | 0.75025  | 0.850751    | no  |
| Gsr     | 22.793   | 23.4954  | 0.04379     | 0.7642   | 0.860034    | no  |
| Gss     | 10.8576  | 7.7749   | -0.481815   | 0.0079   | 0.0223218   | yes |
| Gstcd   | 5.6594   | 5.72082  | 0.0155726   | 0.93085  | 0.962205    | no  |
| Gstk1   | 3.62905  | 3.48422  | -0.0587524  | 0.8483   | 0.91342     | no  |
| Gstm1   | 1.03478  | 0.764256 | -0.4372     | 0.3239   | 0.479016    | no  |
| Gstm4   | 1.50689  | 1.87843  | 0.317951    | 0.32525  | 0.480459    | no  |

|          |          |         |             |          |             |     |
|----------|----------|---------|-------------|----------|-------------|-----|
| Gsto1    | 11.2153  | 18.1618 | 0.695437    | 1.00E-04 | 0.000450026 | yes |
| Gstp1    | 73.5334  | 80.8447 | 0.136753    | 0.3755   | 0.534227    | no  |
| Gstt1    | 1.01188  | 1.03409 | 0.0313285   | 0.95785  | 0.97729     | no  |
| Gstt2    | 23.5909  | 35.0982 | 0.573168    | 0.00035  | 0.0014053   | yes |
| Gstt3    | 0.911744 | 1.81065 | 0.98981     | 0.00495  | 0.0148433   | yes |
| Gstz1    | 5.14521  | 5.48425 | 0.0920644   | 0.7193   | 0.829325    | no  |
| Gtdc1    | 7.90949  | 6.95341 | -0.185864   | 0.2918   | 0.442873    | no  |
| Gtf2a1   | 8.56799  | 8.01739 | -0.0958235  | 0.5241   | 0.675814    | no  |
| Gtf2a2   | 40.8154  | 35.898  | -0.185208   | 0.25955  | 0.405219    | no  |
| Gtf2b    | 55.0144  | 50.1982 | -0.132174   | 0.3776   | 0.536533    | no  |
| Gtf2e1   | 9.78971  | 9.93506 | 0.0212628   | 0.89435  | 0.941055    | no  |
| Gtf2e2   | 23.1185  | 21.2649 | -0.120569   | 0.45065  | 0.608075    | no  |
| Gtf2f1   | 48.3568  | 48.8225 | 0.0138264   | 0.92515  | 0.959108    | no  |
| Gtf2f2   | 25.3506  | 24.794  | -0.0320309  | 0.8387   | 0.9075      | no  |
| Gtf2h1   | 28.8064  | 28.5488 | -0.0129605  | 0.92795  | 0.960656    | no  |
| Gtf2h2   | 16.3859  | 16.0488 | -0.0299911  | 0.85945  | 0.920358    | no  |
| Gtf2h3   | 13.7336  | 14.1581 | 0.0439111   | 0.77985  | 0.870554    | no  |
| Gtf2h4   | 8.65311  | 8.51443 | -0.0233079  | 0.9035   | 0.946731    | no  |
| Gtf2h5   | 38.5638  | 36.4503 | -0.0813139  | 0.59815  | 0.738281    | no  |
| Gtf2i    | 97.7239  | 101.962 | 0.0612417   | 0.6665   | 0.791781    | no  |
| Gtf2ird2 | 3.61893  | 4.8219  | 0.414037    | 0.0279   | 0.0663781   | no  |
| Gtf3a    | 47.7238  | 47.2037 | -0.015809   | 0.93535  | 0.964864    | no  |
| Gtf3c1   | 15.6305  | 14.5129 | -0.10702    | 0.45415  | 0.611838    | no  |
| Gtf3c2   | 29.9635  | 29.0729 | -0.0435314  | 0.9161   | 0.953971    | no  |
| Gtf3c3   | 7.86212  | 8.25046 | 0.0695569   | 0.68165  | 0.802887    | no  |
| Gtf3c4   | 4.59757  | 4.7743  | 0.0544175   | 0.72845  | 0.83544     | no  |
| Gtf3c5   | 12.7166  | 11.9258 | -0.0926285  | 0.5533   | 0.70088     | no  |
| Gtf3c6   | 29.4461  | 29.5028 | 0.00277153  | 0.98825  | 0.993076    | no  |
| Gtf3     | 16.8042  | 18.5908 | 0.14577     | 0.39595  | 0.554976    | no  |
| Gtpbp1   | 59.8403  | 63.7175 | 0.0905722   | 0.52565  | 0.677169    | no  |
| Gtpbp10  | 5.32309  | 6.36302 | 0.257447    | 0.1507   | 0.268265    | no  |
| Gtpbp2   | 62.1858  | 60.2988 | -0.0444556  | 0.75895  | 0.856543    | no  |
| Gtpbp3   | 11.141   | 10.2865 | -0.115127   | 0.4796   | 0.63538     | no  |
| Gtpbp4   | 30.079   | 30.3261 | 0.011802    | 0.933    | 0.963439    | no  |
| Gtpbp6   | 19.5609  | 19.399  | -0.0119964  | 0.94095  | 0.968023    | no  |
| Gtpbp8   | 5.52893  | 5.46237 | -0.0174742  | 0.93455  | 0.964438    | no  |
| Gtse1    | 8.50776  | 5.21092 | -0.707243   | 5.00E-05 | 0.000236281 | yes |
| Gucd1    | 26.4364  | 24.3052 | -0.121264   | 0.40455  | 0.563472    | no  |
| Guf1     | 7.83448  | 8.34023 | 0.0902487   | 0.5771   | 0.720757    | no  |
| Guk1     | 40.9959  | 42.79   | 0.061793    | 0.7017   | 0.816974    | no  |
| Gusb     | 25.2762  | 27.2696 | 0.109514    | 0.46155  | 0.618643    | no  |
| Gxyt1    | 7.90231  | 7.05971 | -0.162666   | 0.29035  | 0.44127     | no  |
| Gyg      | 28.6716  | 29.3202 | 0.0322742   | 0.8317   | 0.90343     | no  |
| Gyk      | 2.40329  | 2.60301 | 0.115169    | 0.55705  | 0.703975    | no  |
| Gypc     | 12.3787  | 11.6121 | -0.0922341  | 0.5783   | 0.721745    | no  |
| Gys1     | 2.37797  | 3.54278 | 0.575152    | 0.00435  | 0.0132558   | yes |
| Gzf1     | 5.02381  | 5.02593 | 0.000606838 | 0.9951   | 0.996682    | no  |
| Gzma     | 3011.63  | 1235.31 | -1.28568    | 5.00E-05 | 0.000236281 | yes |
| Gzmb     | 813.974  | 505.418 | -0.687505   | 5.00E-05 | 0.000236281 | yes |
| Gzmc     | 1.37318  | 1.20928 | -0.183368   | 0.6828   | 0.803692    | no  |
| Gzmk     | 258.508  | 227.857 | -0.18208    | 0.20755  | 0.34582     | no  |
| Gzmm     | 22.6094  | 16.3951 | -0.463653   | 0.00645  | 0.0186894   | yes |
| H13      | 47.5994  | 52.4726 | 0.140621    | 0.4605   | 0.617728    | no  |
| H1f0     | 20.8392  | 21.4137 | 0.039231    | 0.79615  | 0.881293    | no  |
| H2-Aa    | 4.12251  | 4.97226 | 0.270379    | 0.3044   | 0.457267    | no  |
| H2-Ab1   | 3.81233  | 4.26418 | 0.161594    | 0.54     | 0.689552    | no  |
| H2afj    | 45.5699  | 46.7438 | 0.0366946   | 0.7961   | 0.881279    | no  |

|        |         |         |             |          |             |     |
|--------|---------|---------|-------------|----------|-------------|-----|
| H2afv  | 56.9791 | 47.174  | -0.27244    | 0.0632   | 0.132195    | no  |
| H2afx  | 88.9015 | 60.8707 | -0.546461   | 0.00015  | 0.000653255 | yes |
| H2afy  | 267.089 | 270.173 | 0.0165612   | 0.90885  | 0.949752    | no  |
| H2afz  | 622.87  | 447.657 | -0.476539   | 0.00065  | 0.00244919  | yes |
| H2-D1  | 2067.68 | 1836.48 | -0.171064   | 0.36575  | 0.524127    | no  |
| H2-DMa | 8.72346 | 10.2316 | 0.230059    | 0.2177   | 0.358559    | no  |
| H2-Eb1 | 2.4233  | 3.16723 | 0.386251    | 0.1386   | 0.250908    | no  |
| H2-K1  | 2270.19 | 2104.91 | -0.109057   | 0.56015  | 0.706615    | no  |
| H2-Ke2 | 82.6768 | 77.3089 | -0.0968487  | 0.5451   | 0.693742    | no  |
| H2-Ke6 | 71.4269 | 78.2143 | 0.130965    | 0.37655  | 0.535376    | no  |
| H2-L   | 175.192 | 186.133 | 0.0873979   | 0.9234   | 0.958246    | no  |
| H2-M3  | 50.7931 | 42.9607 | -0.241614   | 0.103    | 0.198021    | no  |
| H2-Oa  | 5.03713 | 7.78761 | 0.628579    | 0.00965  | 0.026603    | yes |
| H2-Ob  | 2.16948 | 4.57112 | 1.0752      | 5.00E-05 | 0.000236281 | yes |
| H2-Q10 | 61.9043 | 50.4613 | -0.294862   | 0.04505  | 0.0996184   | no  |
| H2-Q4  | 375.025 | 295.553 | -0.34357    | 0.01875  | 0.0471368   | yes |
| H2-Q7  | 626.019 | 511.812 | -0.290593   | 0.15265  | 0.271094    | no  |
| H2-Q8  | 309.127 | 293.164 | -0.0764877  | 0.58635  | 0.728507    | no  |
| H2-Q9  | 382.917 | 293.834 | -0.382031   | 0.08075  | 0.161826    | no  |
| H2-T10 | 20.3177 | 18.2998 | -0.150912   | 0.3188   | 0.473228    | no  |
| H2-T22 | 45.6982 | 43.8778 | -0.0586453  | 0.80415  | 0.886505    | no  |
| H2-T23 | 327.518 | 292.432 | -0.163473   | 0.266    | 0.413033    | no  |
| H2-T24 | 15.8476 | 12.3403 | -0.360886   | 0.47485  | 0.63122     | no  |
| H2-T9  | 83.8773 | 71.9575 | -0.221134   | 0.235    | 0.379256    | no  |
| H3f3a  | 534.844 | 499.033 | -0.0999826  | 0.48345  | 0.638957    | no  |
| H3f3b  | 497.29  | 497.435 | 0.000421094 | 0.9982   | 0.998525    | no  |
| H6pd   | 7.57251 | 7.0712  | -0.0988165  | 0.53325  | 0.683678    | no  |
| Haao   | 34.1811 | 34.4326 | 0.0105775   | 0.94565  | 0.970482    | no  |
| Habp4  | 9.89626 | 11.517  | 0.218811    | 0.18485  | 0.315925    | no  |
| Hace1  | 11.0536 | 8.29093 | -0.414904   | 0.0084   | 0.0235339   | yes |
| Hacl1  | 2.94407 | 2.73748 | -0.104963   | 0.6331   | 0.766251    | no  |
| Hadh   | 24.7306 | 28.4976 | 0.204543    | 0.18125  | 0.311053    | no  |
| Hadha  | 51.8822 | 48.1703 | -0.107095   | 0.44475  | 0.602498    | no  |
| Hadhb  | 59.7455 | 53.5414 | -0.158175   | 0.2703   | 0.418201    | no  |
| Hagh   | 14.7057 | 16.1674 | 0.136707    | 0.4508   | 0.608265    | no  |
| Haghl  | 7.60255 | 7.20387 | -0.0777097  | 0.81485  | 0.892849    | no  |
| Harbi1 | 3.80538 | 3.74982 | -0.0212178  | 0.918    | 0.955147    | no  |
| Hars   | 47.3266 | 43.9172 | -0.107863   | 0.45545  | 0.613086    | no  |
| Hars2  | 14.6525 | 14.5446 | -0.0106641  | 0.94605  | 0.97078     | no  |
| Hat1   | 36.8948 | 31.2403 | -0.240008   | 0.11145  | 0.2112      | no  |
| Haus1  | 10.4231 | 10.5396 | 0.0160269   | 0.9337   | 0.963951    | no  |
| Haus2  | 9.91203 | 9.19899 | -0.107704   | 0.61155  | 0.748901    | no  |
| Haus3  | 32.1437 | 27.7117 | -0.214042   | 0.1522   | 0.270424    | no  |
| Haus4  | 39.5902 | 36.1357 | -0.131719   | 0.3795   | 0.538496    | no  |
| Haus5  | 9.37331 | 8.8685  | -0.0798686  | 0.6428   | 0.773706    | no  |
| Haus6  | 8.84936 | 7.53106 | -0.232721   | 0.14885  | 0.265561    | no  |
| Haus7  | 12.2006 | 9.5187  | -0.358115   | 0.0614   | 0.129284    | no  |
| Haus8  | 33.482  | 29.973  | -0.159722   | 0.2907   | 0.441679    | no  |
| Havcr2 | 19.6154 | 13.7604 | -0.511469   | 0.00095  | 0.00343861  | yes |
| Hax1   | 32.773  | 33.2373 | 0.0202951   | 0.8975   | 0.943174    | no  |
| Hba-a1 | 2.90149 | 2.89474 | -0.00335617 | 0.96275  | 0.980023    | no  |
| Hbb-b1 | 4.67053 | 5.22542 | 0.161961    | 0.62025  | 0.756053    | no  |
| Hbb-bt | 1.13998 | 1.66006 | 0.54222     | 0.32675  | 0.482109    | no  |
| Hbp1   | 26.5264 | 26.4852 | -0.0022419  | 0.99175  | 0.994922    | no  |
| Hbs1l  | 34.5431 | 31.8514 | -0.117041   | 0.4299   | 0.588183    | no  |
| Hccs   | 16.8347 | 16.0489 | -0.0689622  | 0.659    | 0.786299    | no  |
| Hcfc1  | 39.0937 | 37.4584 | -0.0616475  | 0.6614   | 0.788097    | no  |



|         |         |          |             |          |             |     |
|---------|---------|----------|-------------|----------|-------------|-----|
| Hcfc1r1 | 29.5426 | 28.6275  | -0.0453976  | 0.82135  | 0.897088    | no  |
| Hcfc2   | 6.95113 | 6.09029  | -0.190736   | 0.29925  | 0.451414    | no  |
| Hcls1   | 277.906 | 242.389  | -0.197275   | 0.1646   | 0.288154    | no  |
| Hcst    | 668.096 | 628.855  | -0.0873268  | 0.5367   | 0.686866    | no  |
| Hdac1   | 121.886 | 106.615  | -0.193131   | 0.1734   | 0.300165    | no  |
| Hdac10  | 16.5073 | 19.7581  | 0.259341    | 0.08925  | 0.176006    | no  |
| Hdac2   | 33.351  | 30.2611  | -0.140265   | 0.34665  | 0.503711    | no  |
| Hdac3   | 40.7649 | 38.8391  | -0.0698178  | 0.6386   | 0.770569    | no  |
| Hdac4   | 5.50897 | 6.31024  | 0.195912    | 0.2431   | 0.387938    | no  |
| Hdac5   | 23.2195 | 22.1371  | -0.0688702  | 0.6365   | 0.768811    | no  |
| Hdac6   | 4.22687 | 3.24021  | -0.383506   | 0.039    | 0.0881202   | no  |
| Hdac7   | 114.001 | 144.764  | 0.344659    | 0.02245  | 0.0551326   | no  |
| Hdac8   | 9.3729  | 9.95531  | 0.0869701   | 0.62975  | 0.763466    | no  |
| Hddc2   | 24.6269 | 25.2352  | 0.0352003   | 0.84975  | 0.914255    | no  |
| Hddc3   | 1.92125 | 3.07494  | 0.678517    | 0.0701   | 0.143986    | no  |
| Hdgf    | 86.7393 | 77.4614  | -0.163208   | 0.2526   | 0.396897    | no  |
| Hdgfrp2 | 42.5543 | 40.1029  | -0.0855997  | 0.5474   | 0.695716    | no  |
| Hdgfrp3 | 18.9018 | 15.5549  | -0.281158   | 0.14925  | 0.266167    | no  |
| Hdhd2   | 9.03529 | 8.51439  | -0.0856674  | 0.6226   | 0.757883    | no  |
| Hdlbp   | 29.9251 | 27.66    | -0.113554   | 0.4213   | 0.579687    | no  |
| Heatr1  | 8.85444 | 10.2191  | 0.20679     | 0.16355  | 0.286693    | no  |
| Heatr2  | 19.3934 | 18.8967  | -0.0374353  | 0.8034   | 0.8859      | no  |
| Heatr3  | 9.02598 | 11.4651  | 0.345089    | 0.0297   | 0.0700139   | no  |
| Heatr5a | 2.68603 | 3.2593   | 0.279087    | 0.09555  | 0.186188    | no  |
| Heatr5b | 11.1498 | 10.1307  | -0.138279   | 0.34235  | 0.499024    | no  |
| Heatr6  | 12.2752 | 11.8815  | -0.0470292  | 0.7489   | 0.849835    | no  |
| Heca    | 48.3481 | 46.6984  | -0.0500835  | 0.7184   | 0.82864     | no  |
| Hectd1  | 42.8955 | 47.5146  | 0.147544    | 0.30825  | 0.461469    | no  |
| Hectd3  | 34.9902 | 33.4689  | -0.064129   | 0.65015  | 0.779442    | no  |
| Heg1    | 6.2631  | 8.17366  | 0.384106    | 0.01705  | 0.0433541   | yes |
| Helb    | 13.4473 | 12.3647  | -0.121084   | 0.4097   | 0.56867     | no  |
| Hells   | 12.7968 | 10.4009  | -0.299076   | 0.0587   | 0.124558    | no  |
| Helq    | 6.34968 | 6.93923  | 0.128092    | 0.443    | 0.600796    | no  |
| Helz    | 15.8018 | 16.28    | 0.0430128   | 0.7659   | 0.861124    | no  |
| Helz2   | 24.5651 | 24.9601  | 0.0230147   | 0.87     | 0.926916    | no  |
| Hemk1   | 3.43567 | 3.37948  | -0.0237901  | 0.9125   | 0.952077    | no  |
| Herc1   | 21.7103 | 19.6226  | -0.145858   | 0.3135   | 0.467238    | no  |
| Herc2   | 24.2579 | 26.6059  | 0.133288    | 0.3451   | 0.501996    | no  |
| Herc3   | 20.6077 | 20.7878  | 0.0125482   | 0.9307   | 0.962092    | no  |
| Herc4   | 30.6595 | 29.7568  | -0.0431145  | 0.7612   | 0.85793     | no  |
| Herc6   | 10.0495 | 9.20485  | -0.126659   | 0.4044   | 0.563352    | no  |
| Herpud1 | 33.5173 | 33.4844  | -0.00141554 | 0.9927   | 0.99545     | no  |
| Herpud2 | 30.8422 | 29.393   | -0.0694328  | 0.63355  | 0.766572    | no  |
| Hes6    | 43.5348 | 39.5033  | -0.140196   | 0.3532   | 0.510799    | no  |
| Hexa    | 26.6554 | 27.1807  | 0.0281537   | 0.8562   | 0.918508    | no  |
| Hexb    | 65.0074 | 53.2193  | -0.288654   | 0.0863   | 0.171126    | no  |
| Hexim1  | 35.1355 | 37.3807  | 0.0893644   | 0.52785  | 0.679123    | no  |
| Hexim2  | 1.16574 | 0.796446 | -0.5496     | 0.1182   | 0.221518    | no  |
| Hgs     | 22.7951 | 21.2188  | -0.103382   | 0.48085  | 0.636546    | no  |
| Hgsnat  | 23.9156 | 22.9705  | -0.0581682  | 0.68995  | 0.808991    | no  |
| Hiat1   | 29.8433 | 27.8125  | -0.101672   | 0.48415  | 0.639607    | no  |
| Hiat11  | 34.8797 | 32.9938  | -0.0801925  | 0.569    | 0.713824    | no  |
| Hibadh  | 27.3014 | 29.2855  | 0.101208    | 0.505    | 0.658998    | no  |
| Hibch   | 15.0225 | 17.1005  | 0.186916    | 0.25755  | 0.402765    | no  |
| Hic1    | 2.3711  | 2.21606  | -0.0975607  | 0.65165  | 0.780723    | no  |
| Hid1    | 70.5901 | 44.8569  | -0.654136   | 5.00E-05 | 0.000236281 | yes |
| Hif1a   | 29.0952 | 30.0655  | 0.0473248   | 0.73515  | 0.840433    | no  |

|           |          |           |             |          |            |     |
|-----------|----------|-----------|-------------|----------|------------|-----|
| Hif1an    | 12.351   | 11.5968   | -0.0909014  | 0.52945  | 0.680574   | no  |
| Higd1a    | 24.8962  | 28.0301   | 0.171052    | 0.2604   | 0.406187   | no  |
| Higd2a    | 133.025  | 126.048   | -0.077718   | 0.60215  | 0.741507   | no  |
| Hilpda    | 10.8271  | 12.3547   | 0.190408    | 0.35355  | 0.511127   | no  |
| Hinfp     | 8.77927  | 8.79596   | 0.00273853  | 0.9826   | 0.989978   | no  |
| Hint1     | 357.554  | 365.404   | 0.0313287   | 0.82335  | 0.898272   | no  |
| Hint2     | 23.4284  | 26.0815   | 0.154769    | 0.4382   | 0.596188   | no  |
| Hint3     | 29.9946  | 32.1219   | 0.0988531   | 0.5839   | 0.726576   | no  |
| Hip1      | 24.6124  | 22.5518   | -0.126143   | 0.3711   | 0.529654   | no  |
| Hip1r     | 38.9863  | 52.8019   | 0.43762     | 0.0017   | 0.005774   | yes |
| Hipk1     | 35.5841  | 48.5556   | 0.448406    | 0.00245  | 0.0079866  | yes |
| Hipk2     | 2.13931  | 2.64464   | 0.305922    | 0.12755  | 0.235433   | no  |
| Hipk3     | 13.8937  | 12.6591   | -0.134253   | 0.35695  | 0.514778   | no  |
| Hira      | 17.236   | 17.0785   | -0.0132469  | 0.92865  | 0.961056   | no  |
| Hirip3    | 6.62611  | 6.29924   | -0.0729829  | 0.6875   | 0.807191   | no  |
| Hist1h1b  | 2.42834  | 0.235012  | -3.36917    | 0.01315  | 0.0346908  | yes |
| Hist1h1c  | 29.2352  | 18.2904   | -0.67662    | 6.00E-04 | 0.00228064 | yes |
| Hist1h1d  | 3.63048  | 1.27108   | -1.5141     | 0.002    | 0.0066678  | yes |
| Hist1h1e  | 4.20692  | 2.42178   | -0.796696   | 0.02645  | 0.063502   | no  |
| Hist1h2ab | 1.25271  | 0.0961737 | -3.70327    | 0.25255  | 0.396863   | no  |
| Hist1h2ae | 2.42026  | 0.779653  | -1.63426    | 0.02685  | 0.064307   | no  |
| Hist1h2ak | 1.52394  | 0.50797   | -1.58499    | 0.0679   | 0.140173   | no  |
| Hist1h2bb | 1.5361   | 0.585839  | -1.3907     | 0.11485  | 0.2164     | no  |
| Hist1h2bc | 4.70802  | 2.61977   | -0.845679   | 0.02475  | 0.0600125  | no  |
| Hist1h2be | 2.19091  | 1.04017   | -1.07472    | 0.18825  | 0.320657   | no  |
| Hist1h2bg | 3.24311  | 2.93618   | -0.143436   | 0.76155  | 0.85816    | no  |
| Hist1h2bh | 1.59232  | 0.884575  | -0.848076   | 0.20785  | 0.346206   | no  |
| Hist1h2bj | 1.41033  | 1.0147    | -0.47498    | 0.55515  | 0.702303   | no  |
| Hist1h2bl | 1.01393  | 0.249675  | -2.02184    | 0.17015  | 0.295706   | no  |
| Hist1h2bm | 1.48672  | 0.409967  | -1.85855    | 0.09     | 0.177228   | no  |
| Hist1h2bn | 2.00066  | 0.121417  | -4.04243    | 0.25235  | 0.396819   | no  |
| Hist1h3a  | 1.51454  | 1.33374   | -0.1834     | 0.77305  | 0.865894   | no  |
| Hist1h3c  | 2.35575  | 0.508175  | -2.21279    | 0.041    | 0.0919182  | no  |
| Hist1h3e  | 1.95703  | 0.849052  | -1.20474    | 0.1118   | 0.211721   | no  |
| Hist1h3i  | 1.04292  | 0.502593  | -1.05316    | 0.24805  | 0.393356   | no  |
| Hist1h4a  | 0.939486 | 1.02294   | 0.122782    | 0.9065   | 0.948565   | no  |
| Hist1h4b  | 1.56476  | 1.37959   | -0.181695   | 0.7861   | 0.87475    | no  |
| Hist1h4c  | 3.8092   | 2.17339   | -0.809538   | 0.18165  | 0.311641   | no  |
| Hist1h4d  | 3.13327  | 2.44648   | -0.356962   | 0.56195  | 0.707987   | no  |
| Hist1h4f  | 2.07717  | 0.571213  | -1.86252    | 0.13415  | 0.245135   | no  |
| Hist1h4h  | 1.99188  | 0.722269  | -1.46352    | 0.0991   | 0.191903   | no  |
| Hist1h4i  | 19.4115  | 18.219    | -0.0914665  | 0.73925  | 0.843304   | no  |
| Hist1h4k  | 2.37293  | 1.10875   | -1.09774    | 0.1465   | 0.262131   | no  |
| Hist2h2ac | 1.1504   | 1.94298   | 0.756134    | 0.2596   | 0.40527    | no  |
| Hist2h2bb | 2.61157  | 1.35974   | -0.941586   | 0.11225  | 0.212346   | no  |
| Hist2h2be | 3.95166  | 4.50107   | 0.187809    | 0.34005  | 0.496512   | no  |
| Hist2h4   | 2.71084  | 1.4377    | -0.914976   | 0.2025   | 0.339312   | no  |
| Hist3h2a  | 11.7711  | 15.0495   | 0.354473    | 0.1774   | 0.30568    | no  |
| Hist3h2ba | 20.8628  | 18.6482   | -0.161897   | 0.50765  | 0.661271   | no  |
| Hist4h4   | 1.56037  | 0.729517  | -1.09687    | 0.19745  | 0.332866   | no  |
| Hivep1    | 6.14499  | 7.06681   | 0.201649    | 0.17935  | 0.308385   | no  |
| Hivep2    | 18.8567  | 19.9406   | 0.0806351   | 0.5659   | 0.7113     | no  |
| Hjurp     | 7.0761   | 5.26263   | -0.427171   | 0.09395  | 0.183582   | no  |
| Hk1       | 43.417   | 40.8504   | -0.0879102  | 0.53555  | 0.685904   | no  |
| Hk2       | 2.11782  | 2.72349   | 0.362878    | 0.0539   | 0.115867   | no  |
| Hlcs      | 5.43152  | 6.53381   | 0.266569    | 0.10285  | 0.197803   | no  |
| Hltf      | 26.4134  | 26.3601   | -0.00291518 | 0.98345  | 0.99041    | no  |

|           |         |         |             |          |             |     |
|-----------|---------|---------|-------------|----------|-------------|-----|
| Hmbox1    | 6.57382 | 6.90103 | 0.0700794   | 0.68975  | 0.808891    | no  |
| Hmbs      | 15.2954 | 14.6373 | -0.063446   | 0.7027   | 0.817693    | no  |
| Hmces     | 21.0743 | 22.9426 | 0.122545    | 0.4521   | 0.6096      | no  |
| Hmg20a    | 17.5411 | 18.034  | 0.0399795   | 0.78715  | 0.875546    | no  |
| Hmg20b    | 23.0036 | 24.8539 | 0.111608    | 0.483    | 0.638614    | no  |
| Hmga1     | 25.3073 | 28.0174 | 0.14677     | 0.6194   | 0.755434    | no  |
| Hmga1-rs1 | 40.0727 | 43.4039 | 0.115204    | 0.60845  | 0.746348    | no  |
| Hmgb1     | 191.852 | 174.954 | -0.133015   | 0.3507   | 0.508069    | no  |
| Hmgb2     | 398.416 | 294.619 | -0.435428   | 0.0035   | 0.010941    | yes |
| Hmgb3     | 15.4108 | 13.0439 | -0.240563   | 0.16425  | 0.28767     | no  |
| Hmgcl     | 24.6344 | 25.4478 | 0.0468616   | 0.771    | 0.864626    | no  |
| Hmgcr     | 23.6639 | 21.3979 | -0.145221   | 0.30905  | 0.462412    | no  |
| Hmgn1     | 57.1984 | 64.794  | 0.179885    | 0.2273   | 0.370233    | no  |
| Hmgn2     | 384.914 | 296.859 | -0.37476    | 0.0083   | 0.0232972   | yes |
| Hmgn5     | 21.9378 | 19.7878 | -0.148813   | 0.33895  | 0.495326    | no  |
| Hmgxb3    | 8.19827 | 9.0271  | 0.138942    | 0.36335  | 0.521546    | no  |
| Hmgxb4    | 12.5472 | 11.3238 | -0.148014   | 0.3422   | 0.498867    | no  |
| Hmha1     | 642.4   | 640.769 | -0.00366701 | 0.98505  | 0.991399    | no  |
| Hmmr      | 12.3952 | 6.82768 | -0.86032    | 5.00E-05 | 0.000236281 | yes |
| Hmox1     | 5.27767 | 5.25882 | -0.00516378 | 0.98795  | 0.992966    | no  |
| Hmox2     | 39.649  | 33.7303 | -0.233241   | 0.2297   | 0.373031    | no  |
| Hn1       | 267.6   | 213.478 | -0.325996   | 0.0234   | 0.0571554   | no  |
| Hn1l      | 3.76371 | 2.83861 | -0.406971   | 0.0578   | 0.122925    | no  |
| Hnrnpa0   | 105.819 | 113.78  | 0.104652    | 0.4622   | 0.619303    | no  |
| Hnrnpa1   | 134.757 | 154.566 | 0.19787     | 0.4193   | 0.577825    | no  |
| Hnrnpa2b1 | 442.126 | 421.678 | -0.0683129  | 0.6428   | 0.773706    | no  |
| Hnrnpa3   | 66.5228 | 57.0487 | -0.221656   | 0.4781   | 0.634154    | no  |
| Hnrnpab   | 152.693 | 169.245 | 0.148474    | 0.307    | 0.460096    | no  |
| Hnrnpc    | 152.856 | 145.291 | -0.0732269  | 0.6092   | 0.746983    | no  |
| Hnrnpd    | 31.0909 | 27.5704 | -0.173372   | 0.2299   | 0.373244    | no  |
| Hnrnpdl   | 71.7254 | 67.7109 | -0.0830966  | 0.549    | 0.697159    | no  |
| Hnrnpf    | 537.198 | 532.534 | -0.0125812  | 0.9319   | 0.962782    | no  |
| Hnrnpf1   | 156.086 | 147.135 | -0.0852064  | 0.5466   | 0.695112    | no  |
| Hnrnpf2   | 45.6005 | 45.2195 | -0.0121067  | 0.9312   | 0.962482    | no  |
| Hnrnpf3   | 16.7811 | 16.3263 | -0.0396384  | 0.8667   | 0.924908    | no  |
| Hnrnpk    | 366.345 | 350.982 | -0.0618053  | 0.68145  | 0.802799    | no  |
| Hnrnpl    | 182.654 | 175.687 | -0.0561059  | 0.7011   | 0.816679    | no  |
| Hnrnp1l   | 19.8733 | 16.8211 | -0.240559   | 0.1107   | 0.210123    | no  |
| Hnrnpm    | 171.302 | 172.911 | 0.0134849   | 0.92465  | 0.958829    | no  |
| Hnrnpr    | 18.8608 | 18.66   | -0.0154447  | 0.91045  | 0.950781    | no  |
| Hnrnpu    | 192.323 | 189.674 | -0.0200078  | 0.89155  | 0.939299    | no  |
| Hnrnpul1  | 114.267 | 110.105 | -0.0535222  | 0.69945  | 0.815605    | no  |
| Hnrnpul2  | 87.2171 | 86.1718 | -0.017396   | 0.90275  | 0.946212    | no  |
| Homer1    | 2.44935 | 2.94816 | 0.267417    | 0.26615  | 0.413247    | no  |
| Homez     | 1.98912 | 1.77447 | -0.164742   | 0.40125  | 0.560269    | no  |
| Hook1     | 2.77432 | 3.37117 | 0.281112    | 0.14265  | 0.256562    | no  |
| Hook2     | 2.95051 | 2.80881 | -0.0710029  | 0.74595  | 0.847836    | no  |
| Hook3     | 5.2408  | 5.1143  | -0.0352514  | 0.80515  | 0.887012    | no  |
| Hopx      | 205.455 | 202.554 | -0.0205182  | 0.8856   | 0.93602     | no  |
| Hoxb4     | 1.06834 | 1.10054 | 0.0428391   | 0.88975  | 0.938285    | no  |
| Hp1bp3    | 79.5801 | 84.7616 | 0.0910034   | 0.51915  | 0.671406    | no  |
| Hpcal1    | 65.234  | 64.9443 | -0.00642141 | 0.9637   | 0.980396    | no  |
| Hprt      | 127.389 | 116.077 | -0.134163   | 0.34175  | 0.498325    | no  |
| Hps1      | 21.8182 | 23.2058 | 0.0889512   | 0.54455  | 0.693342    | no  |
| Hps3      | 22.8959 | 21.9311 | -0.0621099  | 0.6828   | 0.803692    | no  |
| Hps4      | 6.95547 | 8.32048 | 0.258518    | 0.13095  | 0.240464    | no  |
| Hps5      | 14.8983 | 14.0854 | -0.0809479  | 0.58575  | 0.728005    | no  |

|               |         |          |             |          |             |     |
|---------------|---------|----------|-------------|----------|-------------|-----|
| Hps6          | 8.36555 | 8.73293  | 0.0620051   | 0.7096   | 0.822684    | no  |
| Hpse          | 1.40435 | 0.732588 | -0.938828   | 0.0024   | 0.00784462  | yes |
| Hras          | 15.4615 | 15.3064  | -0.014538   | 0.9289   | 0.96116     | no  |
| Hrh2          | 17.8243 | 18.0282  | 0.0164078   | 0.9247   | 0.958862    | no  |
| Hrsp12        | 16.557  | 20.1595  | 0.284018    | 0.1184   | 0.221822    | no  |
| Hs1bp3        | 2.68587 | 3.30558  | 0.299514    | 0.1623   | 0.284855    | no  |
| Hs2st1        | 4.33547 | 4.20368  | -0.0445363  | 0.7993   | 0.88327     | no  |
| Hs3st3b1      | 5.35356 | 7.1988   | 0.427259    | 0.00665  | 0.0191807   | yes |
| Hs6st1        | 6.54919 | 9.04024  | 0.465045    | 0.0042   | 0.0128487   | yes |
| Hsbp1         | 55.7455 | 51.6515  | -0.110046   | 0.4629   | 0.62004     | no  |
| Hscb          | 59.2422 | 53.1579  | -0.156341   | 0.32035  | 0.47503     | no  |
| Hsd11b1       | 137.496 | 127.874  | -0.104666   | 0.4602   | 0.617443    | no  |
| Hsd17b10      | 59.9419 | 59.5886  | -0.00852928 | 0.95535  | 0.976122    | no  |
| Hsd17b11      | 22.8606 | 34.0309  | 0.573978    | 5.00E-05 | 0.000236281 | yes |
| Hsd17b12      | 18.7808 | 23.4169  | 0.318293    | 0.04015  | 0.0903455   | no  |
| Hsd17b4       | 23.426  | 23.3371  | -0.00548589 | 0.9706   | 0.983969    | no  |
| Hsd17b7       | 1.31061 | 1.40704  | 0.102422    | 0.65495  | 0.783148    | no  |
| Hsd3b7        | 1.24817 | 1.39042  | 0.155707    | 0.62645  | 0.760851    | no  |
| Hsd1          | 15.784  | 17.0747  | 0.113401    | 0.45925  | 0.616579    | no  |
| Hsd12         | 14.9856 | 14.2966  | -0.0679043  | 0.6615   | 0.788123    | no  |
| Hsf1          | 37.4671 | 36.92    | -0.0212237  | 0.88545  | 0.935946    | no  |
| Hsf2          | 2.46824 | 2.13118  | -0.211831   | 0.37625  | 0.535057    | no  |
| Hsf4          | 3.64845 | 3.03896  | -0.263704   | 0.2817   | 0.431534    | no  |
| Hsh2d         | 17.3961 | 18.4492  | 0.0847989   | 0.6264   | 0.760816    | no  |
| Hsp90aa1      | 163.988 | 164.903  | 0.00802122  | 0.95395  | 0.975285    | no  |
| Hsp90ab1      | 628.692 | 620.145  | -0.0197485  | 0.89965  | 0.944435    | no  |
| Hsp90b1       | 219.835 | 206.276  | -0.0918448  | 0.5259   | 0.677368    | no  |
| Hspa13        | 4.86179 | 5.07943  | 0.0631783   | 0.71455  | 0.826089    | no  |
| Hspa14        | 56.1772 | 48.9091  | -0.199882   | 0.18355  | 0.314228    | no  |
| Hspa2         | 3.61286 | 3.99618  | 0.145478    | 0.47665  | 0.632861    | no  |
| Hspa4         | 38.1758 | 36.8758  | -0.0499832  | 0.71835  | 0.828622    | no  |
| Hspa4l        | 11.4013 | 8.87325  | -0.361661   | 0.02235  | 0.0549252   | no  |
| Hspa5         | 340.957 | 390.383  | 0.195301    | 0.18205  | 0.312168    | no  |
| Hspa8         | 1664.93 | 1470.06  | -0.179593   | 0.32385  | 0.478962    | no  |
| Hspa9         | 40.8166 | 48.2117  | 0.240225    | 0.09045  | 0.17799     | no  |
| Hspb11        | 16.6853 | 20.6579  | 0.308116    | 0.1755   | 0.303027    | no  |
| Hspb6         | 2.16969 | 1.83276  | -0.243467   | 0.44715  | 0.604612    | no  |
| Hspbap1       | 2.54829 | 2.9367   | 0.204666    | 0.28375  | 0.433856    | no  |
| Hspbp1        | 15.6006 | 20.3822  | 0.385705    | 0.0229   | 0.0561128   | no  |
| Hspd1         | 87.8173 | 84.9929  | -0.0471628  | 0.74065  | 0.844205    | no  |
| Hspe1         | 145.235 | 160.397  | 0.143253    | 0.32035  | 0.47503     | no  |
| Hsph1         | 64.8433 | 68.3205  | 0.0753617   | 0.5888   | 0.730625    | no  |
| Htatip2       | 36.4866 | 34.4924  | -0.0810868  | 0.61155  | 0.748901    | no  |
| Htatsf1       | 27.1132 | 27.8759  | 0.0400261   | 0.78715  | 0.875546    | no  |
| Htra2         | 11.0703 | 10.7547  | -0.0417372  | 0.81485  | 0.892849    | no  |
| Htt           | 8.93893 | 9.44528  | 0.0794919   | 0.576    | 0.719867    | no  |
| Hus1          | 4.25172 | 4.57237  | 0.104895    | 0.54395  | 0.692878    | no  |
| Huwe1         | 39.7352 | 45.1232  | 0.183452    | 0.19595  | 0.330819    | no  |
| Hvcn1         | 21.3084 | 24.3054  | 0.189856    | 0.36995  | 0.528526    | no  |
| Hyal2         | 1.31722 | 1.39706  | 0.0849028   | 0.7914   | 0.878321    | no  |
| Hyi           | 14.0162 | 14.4762  | 0.0465835   | 0.94155  | 0.968358    | no  |
| Hyls1         | 8.86578 | 7.87187  | -0.17154    | 0.56975  | 0.71446     | no  |
| Hyou1         | 24.2454 | 27.0387  | 0.157316    | 0.2696   | 0.417365    | no  |
| Hypk          | 197.216 | 187.52   | -0.0727306  | 0.62015  | 0.755957    | no  |
| I830012O16Rik | 1.22453 | 0.768608 | -0.671911   | 0.0621   | 0.130455    | no  |
| lah1          | 49.8046 | 47.9014  | -0.0562102  | 0.8569   | 0.918993    | no  |
| lars          | 17.6838 | 18.3423  | 0.0527442   | 0.70815  | 0.821722    | no  |

|          |         |          |             |          |             |     |
|----------|---------|----------|-------------|----------|-------------|-----|
| lars2    | 26.5748 | 26.1202  | -0.0248947  | 0.8952   | 0.941528    | no  |
| lba57    | 2.78035 | 2.80161  | 0.0109892   | 0.9545   | 0.975691    | no  |
| lbtck    | 9.88617 | 10.6196  | 0.10325     | 0.4839   | 0.639384    | no  |
| lca1     | 1.11553 | 0.749274 | -0.574166   | 0.1525   | 0.270916    | no  |
| lcam1    | 50.8683 | 47.7504  | -0.0912541  | 0.5239   | 0.675642    | no  |
| lcam2    | 60.01   | 60.109   | 0.00237815  | 0.9855   | 0.991597    | no  |
| lck      | 1.39492 | 1.74472  | 0.322815    | 0.10265  | 0.197499    | no  |
| lcmt     | 11.7673 | 11.9608  | 0.023529    | 0.8743   | 0.929435    | no  |
| lcos     | 36.7467 | 48.1246  | 0.389161    | 0.0063   | 0.0183103   | yes |
| lcosl    | 3.77092 | 5.24455  | 0.475904    | 0.01475  | 0.0382892   | yes |
| lct1     | 95.1559 | 79.3237  | -0.262541   | 0.0852   | 0.169316    | no  |
| ld2      | 641.274 | 671.386  | 0.0662015   | 0.6503   | 0.779569    | no  |
| ld3      | 6.76446 | 10.0557  | 0.571965    | 0.01595  | 0.0409554   | yes |
| lde      | 31.9716 | 29.3644  | -0.122722   | 0.3812   | 0.540192    | no  |
| ldh1     | 4.31623 | 3.98757  | -0.114264   | 0.577    | 0.720722    | no  |
| ldh2     | 21.1899 | 23.6342  | 0.157496    | 0.31255  | 0.466245    | no  |
| ldh3a    | 48.9148 | 52.3426  | 0.0977152   | 0.49625  | 0.650805    | no  |
| ldh3b    | 117.743 | 108.493  | -0.118043   | 0.53245  | 0.68295     | no  |
| ldh3g    | 78.8771 | 76.5777  | -0.0426826  | 0.76745  | 0.862111    | no  |
| ldi1     | 11.8399 | 9.8874   | -0.259998   | 0.1078   | 0.205619    | no  |
| ldnk     | 31.4229 | 32.2919  | 0.0393555   | 0.7925   | 0.878934    | no  |
| lds      | 13.2555 | 13.4709  | 0.0232497   | 0.8724   | 0.928391    | no  |
| ldua     | 6.876   | 6.42639  | -0.0975616  | 0.7127   | 0.824828    | no  |
| ler2     | 203.572 | 204.585  | 0.00716156  | 0.9596   | 0.978255    | no  |
| ler3     | 18.5007 | 32.5547  | 0.815287    | 5.00E-05 | 0.000236281 | yes |
| ler3ip1  | 40.2658 | 43.7113  | 0.118449    | 0.43465  | 0.592798    | no  |
| ler5     | 102.123 | 102.417  | 0.00415575  | 0.97595  | 0.986779    | no  |
| lffo1    | 16.237  | 15.7862  | -0.0406218  | 0.7856   | 0.874428    | no  |
| lffo2    | 3.71118 | 3.32946  | -0.15659    | 0.3652   | 0.523541    | no  |
| lfi203   | 130.088 | 125.081  | -0.0566273  | 0.6828   | 0.803692    | no  |
| lfi27    | 108.905 | 91.8177  | -0.246232   | 0.1457   | 0.26095     | no  |
| lfi27l2a | 105.196 | 69.5113  | -0.597761   | 0.06675  | 0.138199    | no  |
| lfi30    | 21.0546 | 17.1688  | -0.294347   | 0.1089   | 0.207297    | no  |
| lfi35    | 46.8917 | 43.8944  | -0.0952934  | 0.53015  | 0.681102    | no  |
| lfi47    | 114.092 | 97.2921  | -0.229806   | 0.12485  | 0.231412    | no  |
| lfih1    | 3.39377 | 3.24803  | -0.0633238  | 0.715    | 0.826433    | no  |
| lfit1    | 3.29997 | 2.87959  | -0.196586   | 0.3553   | 0.512964    | no  |
| lfit2    | 18.3697 | 10.3625  | -0.825956   | 5.00E-05 | 0.000236281 | yes |
| lfit3    | 7.04173 | 4.84917  | -0.53819    | 0.00755  | 0.0214505   | yes |
| lfitm1   | 16.4499 | 79.1406  | 2.26634     | 5.00E-05 | 0.000236281 | yes |
| lfitm10  | 9.14807 | 5.62622  | -0.701302   | 1.00E-04 | 0.000450026 | yes |
| lfitm2   | 1.24983 | 3.27581  | 1.39012     | 0.011    | 0.0297986   | yes |
| lfitm3   | 2.53204 | 5.10329  | 1.01113     | 0.0103   | 0.0281508   | yes |
| lfnar1   | 31.8104 | 31.8223  | 0.000536762 | 0.9971   | 0.997863    | no  |
| lfnar2   | 52.6094 | 48.9047  | -0.105346   | 0.53875  | 0.688416    | no  |
| lfng     | 324.236 | 275.086  | -0.23716    | 0.0989   | 0.1916      | no  |
| lfngr1   | 136.138 | 141.509  | 0.0558274   | 0.6901   | 0.809087    | no  |
| lfrd1    | 37.0989 | 40.9849  | 0.143719    | 0.33405  | 0.490033    | no  |
| lfrd2    | 4.7285  | 6.70938  | 0.504796    | 0.01245  | 0.0331127   | yes |
| lft140   | 5.20102 | 5.1793   | -0.00603632 | 0.97125  | 0.984246    | no  |
| lft172   | 1.79461 | 2.32645  | 0.37446     | 0.4591   | 0.616471    | no  |
| lft20    | 52.4179 | 51.3617  | -0.0293653  | 0.85765  | 0.919546    | no  |
| lft27    | 20.1715 | 15.1954  | -0.40868    | 0.02525  | 0.0610571   | no  |
| lft46    | 7.08689 | 5.41982  | -0.386908   | 0.02575  | 0.0620811   | no  |
| lft52    | 33.393  | 30.6837  | -0.122074   | 0.4079   | 0.566774    | no  |
| lft57    | 1.08285 | 1.45833  | 0.429489    | 0.13875  | 0.251148    | no  |
| lft74    | 1.36799 | 1.36907  | 0.00113796  | 0.99215  | 0.995139    | no  |

|         |          |          |            |          |             |     |
|---------|----------|----------|------------|----------|-------------|-----|
| ift80   | 4.68955  | 5.78101  | 0.301873   | 0.07825  | 0.157662    | no  |
| lgbp1   | 92.703   | 87.3978  | -0.0850187 | 0.5478   | 0.696086    | no  |
| lgf2bp3 | 2.90277  | 2.08193  | -0.479508  | 0.0169   | 0.0430564   | yes |
| lgf2r   | 41.4503  | 51.0266  | 0.299864   | 0.0354   | 0.0811656   | no  |
| lgflr1  | 18.8983  | 25.6255  | 0.439326   | 0.01005  | 0.0275561   | yes |
| lghmbp2 | 4.95247  | 5.1204   | 0.0481089  | 0.76625  | 0.861366    | no  |
| lgip    | 2.26356  | 2.47425  | 0.1284     | 0.6654   | 0.790887    | no  |
| lgsf10  | 1.36682  | 0.732738 | -0.899451  | 0.0977   | 0.189739    | no  |
| lgsf8   | 5.97767  | 6.30471  | 0.0768471  | 0.68325  | 0.804007    | no  |
| lgtp    | 39.7332  | 37.9117  | -0.0677036 | 0.63635  | 0.768735    | no  |
| lk      | 102.766  | 98.4142  | -0.0624249 | 0.65895  | 0.786266    | no  |
| lkbip   | 1.99861  | 1.20796  | -0.726426  | 0.06025  | 0.12733     | no  |
| lkbkap  | 5.81082  | 6.57267  | 0.177738   | 0.38965  | 0.548783    | no  |
| lkbkb   | 56.5189  | 65.4411  | 0.211463   | 0.1333   | 0.243891    | no  |
| lkbke   | 51.9235  | 69.6512  | 0.423762   | 0.00235  | 0.00770045  | yes |
| lkbkg   | 11.071   | 11.5603  | 0.0623837  | 0.74955  | 0.850353    | no  |
| lkzf1   | 129.331  | 120.059  | -0.107328  | 0.45515  | 0.612858    | no  |
| lkzf2   | 0.613104 | 1.69963  | 1.47102    | 5.00E-05 | 0.000236281 | yes |
| lkzf3   | 156.27   | 119.476  | -0.387318  | 0.00675  | 0.0194405   | yes |
| lkzf5   | 13.8647  | 13.454   | -0.0433812 | 0.7735   | 0.866246    | no  |
| ll10ra  | 42.125   | 39.6492  | -0.0873846 | 0.537    | 0.687126    | no  |
| ll10rb  | 58.6911  | 54.9912  | -0.0939422 | 0.507    | 0.660729    | no  |
| ll11ra1 | 2.02948  | 2.52265  | 0.313833   | 0.28125  | 0.431051    | no  |
| ll12rb1 | 20.8716  | 22.0285  | 0.0778316  | 0.60775  | 0.745839    | no  |
| ll12rb2 | 22.4613  | 20.6314  | -0.122602  | 0.4092   | 0.568222    | no  |
| ll15    | 1.78765  | 2.60968  | 0.545807   | 0.088    | 0.173998    | no  |
| ll15ra  | 17.0552  | 16.3666  | -0.0594569 | 0.72575  | 0.833752    | no  |
| ll16    | 56.1641  | 54.2834  | -0.0491365 | 0.7264   | 0.834268    | no  |
| ll17ra  | 100.596  | 102.512  | 0.0272177  | 0.8494   | 0.914061    | no  |
| ll18    | 2.71697  | 4.21876  | 0.634822   | 0.0529   | 0.114005    | no  |
| ll18bp  | 2.75196  | 2.38831  | -0.20447   | 0.4726   | 0.629153    | no  |
| ll18r1  | 168.659  | 248.039  | 0.556462   | 0.00045  | 0.0017621   | yes |
| ll18rap | 208.488  | 129.648  | -0.685364  | 5.00E-05 | 0.000236281 | yes |
| ll1rap  | 5.98491  | 5.30208  | -0.17477   | 0.321    | 0.475844    | no  |
| ll1rl2  | 1.46024  | 1.88268  | 0.366574   | 0.20735  | 0.345569    | no  |
| ll20rb  | 1.96269  | 1.94768  | -0.0110765 | 0.9593   | 0.978091    | no  |
| ll21r   | 78.3096  | 74.2395  | -0.0770019 | 0.5878   | 0.729833    | no  |
| ll27ra  | 89.1259  | 112.17   | 0.331777   | 0.02045  | 0.0508419   | no  |
| ll2ra   | 7.14213  | 7.6711   | 0.103081   | 0.5094   | 0.662877    | no  |
| ll2rb   | 219.911  | 247.828  | 0.17242    | 0.2353   | 0.379601    | no  |
| ll2rg   | 526.818  | 517.588  | -0.0255024 | 0.86075  | 0.921345    | no  |
| ll31ra  | 0.594796 | 1.57716  | 1.40686    | 5.00E-05 | 0.000236281 | yes |
| ll3ra   | 9.94034  | 8.32187  | -0.256388  | 0.18715  | 0.319153    | no  |
| ll4ra   | 13.426   | 13.1964  | -0.0248823 | 0.86455  | 0.923577    | no  |
| ll6ra   | 5.20126  | 14.6665  | 1.49559    | 5.00E-05 | 0.000236281 | yes |
| ll6st   | 8.71063  | 10.5825  | 0.280836   | 0.0637   | 0.133079    | no  |
| ll7r    | 78.0996  | 156.146  | 0.99951    | 5.00E-05 | 0.000236281 | yes |
| lldr1   | 8.00746  | 7.70989  | -0.0546342 | 0.7443   | 0.84682     | no  |
| llf2    | 29.9582  | 27.7621  | -0.109834  | 0.57445  | 0.718465    | no  |
| llf3    | 25.6796  | 23.6958  | -0.11599   | 0.42545  | 0.583838    | no  |
| llk     | 130.824  | 115.543  | -0.1792    | 0.3398   | 0.49624     | no  |
| llkap   | 60.933   | 57.2714  | -0.0894099 | 0.5398   | 0.689458    | no  |
| llvbl   | 17.8389  | 17.6564  | -0.0148362 | 0.92345  | 0.958246    | no  |
| lmp1l   | 29.5584  | 28.5776  | -0.0486824 | 0.77445  | 0.86698     | no  |
| lmp2l   | 1.74079  | 1.79339  | 0.0429456  | 0.9124   | 0.952014    | no  |
| lmmt    | 37.6939  | 34.7016  | -0.11933   | 0.4091   | 0.568128    | no  |
| lmp3    | 90.1384  | 87.7614  | -0.0385543 | 0.7904   | 0.877763    | no  |

|        |          |         |             |          |             |     |
|--------|----------|---------|-------------|----------|-------------|-----|
| Imp4   | 28.1434  | 29.2862 | 0.0574246   | 0.698    | 0.814708    | no  |
| Impa1  | 42.9027  | 39.2633 | -0.127887   | 0.37695  | 0.535826    | no  |
| Impa2  | 12.7971  | 14.955  | 0.224813    | 0.2029   | 0.339821    | no  |
| Impact | 9.969    | 9.99799 | 0.00418937  | 0.97925  | 0.988366    | no  |
| Impad1 | 19.188   | 18.806  | -0.0290149  | 0.83955  | 0.908044    | no  |
| Impdh1 | 44.5345  | 41.0377 | -0.117973   | 0.40715  | 0.565954    | no  |
| Impdh2 | 49.0221  | 46.2951 | -0.0825748  | 0.572    | 0.716352    | no  |
| Inadl  | 0.699754 | 1.28121 | 0.872591    | 0.00455  | 0.0137968   | yes |
| Incenp | 40.4145  | 26.754  | -0.595117   | 5.00E-05 | 0.000236281 | yes |
| Inf2   | 16.4497  | 17.6367 | 0.100517    | 0.48635  | 0.641553    | no  |
| Ing1   | 32.3349  | 29.9519 | -0.110443   | 0.4482   | 0.605626    | no  |
| Ing2   | 11.9294  | 10.3787 | -0.200902   | 0.2183   | 0.359237    | no  |
| Ing3   | 12.9929  | 11.7655 | -0.143155   | 0.34735  | 0.504489    | no  |
| Ing4   | 43.9805  | 39.9146 | -0.139947   | 0.3511   | 0.508471    | no  |
| Ing5   | 9.47651  | 8.59476 | -0.140898   | 0.36245  | 0.52072     | no  |
| Inip   | 10.9641  | 10.0182 | -0.130159   | 0.41665  | 0.57524     | no  |
| Ino80  | 13.6483  | 13.5065 | -0.0150612  | 0.91895  | 0.955755    | no  |
| Ino80b | 42.7267  | 39.4432 | -0.115362   | 0.45765  | 0.615109    | no  |
| Ino80c | 25.6948  | 22.3633 | -0.200338   | 0.1866   | 0.318377    | no  |
| Ino80d | 11.3087  | 11.6558 | 0.0436107   | 0.7561   | 0.854502    | no  |
| Ino80e | 37.2324  | 37.4953 | 0.0101539   | 0.9513   | 0.973958    | no  |
| Inpp1  | 37.6311  | 34.2716 | -0.134911   | 0.3714   | 0.529943    | no  |
| Inpp4a | 15.7731  | 12.7913 | -0.302304   | 0.04585  | 0.101087    | no  |
| Inpp4b | 5.87154  | 7.80353 | 0.410387    | 0.0132   | 0.0348032   | yes |
| Inpp5a | 1.08321  | 1.18309 | 0.127256    | 0.66045  | 0.787391    | no  |
| Inpp5b | 36.142   | 32.5957 | -0.148994   | 0.29075  | 0.441745    | no  |
| Inpp5d | 54.0422  | 55.5731 | 0.0402983   | 0.7746   | 0.867107    | no  |
| Inpp5e | 19.4112  | 19.6114 | 0.0148016   | 0.94055  | 0.967851    | no  |
| Inpp5f | 3.24137  | 2.65928 | -0.285569   | 0.12715  | 0.234836    | no  |
| Inpp5k | 55.2396  | 49.6103 | -0.155064   | 0.27685  | 0.425907    | no  |
| Inpp11 | 4.4636   | 4.41186 | -0.0168217  | 0.92255  | 0.957904    | no  |
| Insig1 | 14.4006  | 12.9837 | -0.149428   | 0.3453   | 0.502214    | no  |
| Insig2 | 7.03089  | 6.72412 | -0.0643601  | 0.7151   | 0.826494    | no  |
| Insl3  | 6.14567  | 10.4897 | 0.771332    | 0.58035  | 0.723536    | no  |
| Insl6  | 45.6589  | 22.7227 | -1.00676    | 5.00E-05 | 0.000236281 | yes |
| Insr   | 0.651325 | 1.04833 | 0.686639    | 0.00145  | 0.00501121  | yes |
| Ints1  | 20.5449  | 20.8252 | 0.0195457   | 0.89095  | 0.938933    | no  |
| Ints10 | 18.3101  | 18.927  | 0.0478012   | 0.7563   | 0.854564    | no  |
| Ints12 | 8.33138  | 7.5269  | -0.1465     | 0.3821   | 0.541152    | no  |
| Ints2  | 3.45426  | 4.03441 | 0.223982    | 0.19345  | 0.327413    | no  |
| Ints3  | 24.4254  | 25.5175 | 0.0631066   | 0.6615   | 0.788123    | no  |
| Ints4  | 15.3227  | 15.4925 | 0.0159003   | 0.91265  | 0.952149    | no  |
| Ints5  | 11.6052  | 11.4404 | -0.0206242  | 0.8915   | 0.939274    | no  |
| Ints6  | 11.1158  | 12.5661 | 0.176932    | 0.2341   | 0.378106    | no  |
| Ints7  | 21.5866  | 21.4834 | -0.0069074  | 0.9614   | 0.979284    | no  |
| Ints8  | 22.5517  | 21.7508 | -0.0521691  | 0.7272   | 0.834752    | no  |
| Ints9  | 19.5312  | 18.142  | -0.106445   | 0.48645  | 0.641637    | no  |
| Invs   | 4.49044  | 4.54835 | 0.0184841   | 0.95115  | 0.973847    | no  |
| Ip6k1  | 46.084   | 46.6808 | 0.018563    | 0.8942   | 0.940925    | no  |
| Ip6k2  | 18.175   | 17.2194 | -0.0779263  | 0.6255   | 0.760155    | no  |
| Ipcef1 | 39.2728  | 43.4398 | 0.145486    | 0.33845  | 0.494831    | no  |
| lpmk   | 6.615    | 6.23504 | -0.085341   | 0.5863   | 0.728458    | no  |
| lpo11  | 7.18858  | 7.14807 | -0.00815366 | 0.95905  | 0.977972    | no  |
| lpo13  | 11.9345  | 13.4401 | 0.1714      | 0.2644   | 0.411163    | no  |
| lpo4   | 5.95278  | 8.37047 | 0.491746    | 0.00325  | 0.0102567   | yes |
| lpo5   | 29.652   | 28.9103 | -0.0365493  | 0.80195  | 0.884965    | no  |
| lpo7   | 35.0557  | 33.8526 | -0.0503818  | 0.7202   | 0.829997    | no  |

|         |          |         |              |          |             |     |
|---------|----------|---------|--------------|----------|-------------|-----|
| lpo8    | 16.3114  | 16.6653 | 0.0309637    | 0.8295   | 0.902081    | no  |
| lpo9    | 14.6754  | 13.256  | -0.146758    | 0.315    | 0.46881     | no  |
| lpp     | 10.1454  | 9.24101 | -0.134704    | 0.4342   | 0.592413    | no  |
| lppk    | 6.05832  | 7.16424 | 0.241896     | 0.1672   | 0.291758    | no  |
| lqcc    | 7.60572  | 8.71234 | 0.195975     | 0.2736   | 0.422104    | no  |
| lqce    | 13.2339  | 14.3277 | 0.114566     | 0.4376   | 0.595624    | no  |
| lqcg    | 10.0618  | 10.035  | -0.00385009  | 0.988    | 0.992966    | no  |
| lqgap1  | 120.111  | 127.629 | 0.0875851    | 0.5549   | 0.702113    | no  |
| lqgap2  | 53.4956  | 61.4205 | 0.199299     | 0.1741   | 0.301118    | no  |
| lqgap3  | 2.10823  | 1.06282 | -0.988141    | 5.00E-05 | 0.000236281 | yes |
| lqsec1  | 16.559   | 14.2921 | -0.212401    | 0.1393   | 0.252014    | no  |
| lrak1   | 35.9304  | 35.9041 | -0.00105823  | 0.99325  | 0.995761    | no  |
| lrak2   | 11.1483  | 11.8592 | 0.0891854    | 0.5693   | 0.714061    | no  |
| lrak3   | 0.402208 | 1.67999 | 2.06244      | 5.00E-05 | 0.000236281 | yes |
| lrak4   | 17.8121  | 17.8514 | 0.00317815   | 0.98445  | 0.990979    | no  |
| lreb2   | 14.768   | 15.7996 | 0.0974153    | 0.49695  | 0.651396    | no  |
| lrf1    | 159.006  | 156.225 | -0.0254518   | 0.85815  | 0.919829    | no  |
| lrf2    | 59.3751  | 49.6248 | -0.258797    | 0.07335  | 0.149362    | no  |
| lrf2bp1 | 18.4235  | 18.416  | -0.000589709 | 0.99725  | 0.997929    | no  |
| lrf2bp2 | 19.6389  | 25.0193 | 0.349327     | 0.01325  | 0.0349155   | yes |
| lrf2bpl | 25.3798  | 23.586  | -0.105754    | 0.45615  | 0.613736    | no  |
| lrf3    | 67.1673  | 64.346  | -0.0619084   | 0.65575  | 0.783786    | no  |
| lrf4    | 8.68229  | 9.47048 | 0.125362     | 0.40595  | 0.564909    | no  |
| lrf5    | 3.02955  | 3.24877 | 0.100789     | 0.6608   | 0.787701    | no  |
| lrf7    | 38.3038  | 33.8565 | -0.178052    | 0.2333   | 0.377298    | no  |
| lrf8    | 8.18496  | 7.85692 | -0.0590118   | 0.7237   | 0.832372    | no  |
| lrf9    | 41.644   | 39.0268 | -0.0936427   | 0.5213   | 0.673372    | no  |
| lrgm1   | 30.5759  | 28.9843 | -0.0771223   | 0.6079   | 0.745881    | no  |
| lrgm2   | 6.69691  | 6.74617 | 0.0105724    | 0.9498   | 0.972973    | no  |
| lrgq    | 4.02122  | 4.23943 | 0.0762357    | 0.64245  | 0.773482    | no  |
| lsca1   | 28.7677  | 29.0791 | 0.0155309    | 0.9202   | 0.956519    | no  |
| lsca2   | 26.9116  | 23.7488 | -0.180376    | 0.31135  | 0.464976    | no  |
| lscu    | 43.6018  | 49.0895 | 0.171029     | 0.28045  | 0.430236    | no  |
| lsg15   | 16.1873  | 18.4122 | 0.185801     | 0.34965  | 0.506995    | no  |
| lsg20   | 5.91708  | 6.31761 | 0.0944939    | 0.68535  | 0.805619    | no  |
| lsg20l2 | 31.9315  | 29.1962 | -0.1292      | 0.36845  | 0.527001    | no  |
| lsl2    | 14.9449  | 27.1546 | 0.861544     | 5.00E-05 | 0.000236281 | yes |
| lsoc1   | 9.46183  | 11.9594 | 0.33795      | 0.0415   | 0.0928711   | no  |
| lsoc2a  | 18.389   | 23.0398 | 0.325285     | 0.06205  | 0.130384    | no  |
| lsoc2b  | 16.3101  | 16.1984 | -0.00991318  | 0.9582   | 0.977478    | no  |
| lst1    | 53.6101  | 50.1323 | -0.0967649   | 0.49875  | 0.652992    | no  |
| lsy1    | 69.8137  | 67.7143 | -0.0440497   | 0.75795  | 0.855743    | no  |
| lsyna1  | 42.2752  | 49.288  | 0.221423     | 0.1324   | 0.242603    | no  |
| ltch    | 25.2571  | 26.7737 | 0.0841273    | 0.5506   | 0.698575    | no  |
| ltfg1   | 20.5482  | 21.4879 | 0.0645112    | 0.66635  | 0.79163     | no  |
| ltfg2   | 9.2552   | 8.27336 | -0.16179     | 0.3598   | 0.517766    | no  |
| ltfg3   | 10.7151  | 11.6772 | 0.124037     | 0.4371   | 0.59507     | no  |
| ltga1   | 13.7167  | 17.7013 | 0.367923     | 0.02155  | 0.0532373   | no  |
| ltga2   | 3.92997  | 3.77526 | -0.0579453   | 0.7474   | 0.848815    | no  |
| ltga4   | 330.06   | 298.427 | -0.145348    | 0.41915  | 0.577742    | no  |
| ltga6   | 13.2479  | 15.1771 | 0.196138     | 0.1692   | 0.29436     | no  |
| ltgad   | 1.87572  | 1.47236 | -0.349313    | 0.12405  | 0.230219    | no  |
| ltgae   | 0.868945 | 2.41284 | 1.4734       | 0.0064   | 0.018565    | yes |
| ltgal   | 445.374  | 363.981 | -0.291153    | 0.07585  | 0.153615    | no  |
| ltgam   | 48.0976  | 27.647  | -0.798842    | 5.00E-05 | 0.000236281 | yes |
| ltgav   | 4.67693  | 4.42855 | -0.0787259   | 0.6186   | 0.754811    | no  |
| ltgax   | 249.433  | 233.856 | -0.0930353   | 0.52975  | 0.680848    | no  |



|          |         |          |              |          |             |     |
|----------|---------|----------|--------------|----------|-------------|-----|
| ltgb1    | 612.028 | 786.278  | 0.361441     | 0.0424   | 0.0946331   | no  |
| ltgb1bp1 | 37.5744 | 33.3013  | -0.174175    | 0.25875  | 0.404256    | no  |
| ltgb2    | 597.001 | 425.541  | -0.488435    | 0.0019   | 0.00637506  | yes |
| ltgb3    | 4.65258 | 11.0521  | 1.24822      | 5.00E-05 | 0.000236281 | yes |
| ltgb3bp  | 2.65102 | 3.31931  | 0.324335     | 0.13455  | 0.245688    | no  |
| ltgb7    | 477.65  | 589.359  | 0.303192     | 0.04965  | 0.108137    | no  |
| ltk      | 158.492 | 160.988  | 0.0225494    | 0.88695  | 0.936647    | no  |
| ltm2a    | 7.0538  | 4.86836  | -0.534965    | 0.01065  | 0.0289694   | yes |
| ltm2b    | 565.17  | 542.682  | -0.0585769   | 0.6881   | 0.807668    | no  |
| ltm2c    | 38.203  | 43.4793  | 0.186641     | 0.20405  | 0.341294    | no  |
| ltpa     | 48.2001 | 48.1858  | -0.000426804 | 0.99725  | 0.997929    | no  |
| ltpk1    | 27.659  | 28.3261  | 0.0343857    | 0.81845  | 0.895251    | no  |
| ltpkb    | 41.5842 | 46.6203  | 0.164921     | 0.24055  | 0.385698    | no  |
| ltpkc    | 5.48635 | 5.65008  | 0.0424231    | 0.8121   | 0.891358    | no  |
| ltpr1    | 11.477  | 11.5468  | 0.00874694   | 0.9521   | 0.974325    | no  |
| ltpr2    | 13.7737 | 14.1913  | 0.0430892    | 0.75755  | 0.855483    | no  |
| ltpr3    | 30.0868 | 36.1665  | 0.265525     | 0.0566   | 0.12081     | no  |
| ltprip   | 16.8697 | 18.0308  | 0.0960231    | 0.51165  | 0.664813    | no  |
| ltpripl1 | 9.54053 | 8.64274  | -0.142581    | 0.36995  | 0.528526    | no  |
| ltpripl2 | 2.75388 | 3.04639  | 0.145633     | 0.39435  | 0.553525    | no  |
| ltsn1    | 1.46216 | 2.93635  | 1.00592      | 5.00E-05 | 0.000236281 | yes |
| ltsn2    | 51.1787 | 50.5839  | -0.016863    | 0.9125   | 0.952077    | no  |
| lvd      | 12.6707 | 15.2704  | 0.269247     | 0.1037   | 0.199134    | no  |
| lvns1abp | 95.2855 | 99.2757  | 0.0591837    | 0.6766   | 0.799206    | no  |
| lws1     | 7.6985  | 7.62649  | -0.013559    | 0.92295  | 0.958094    | no  |
| lzumo4   | 23.8594 | 23.0001  | -0.0529195   | 0.76325  | 0.85939     | no  |
| Jade1    | 5.41586 | 5.83515  | 0.107579     | 0.50235  | 0.656463    | no  |
| Jade2    | 16.9064 | 15.2254  | -0.151085    | 0.29135  | 0.442324    | no  |
| Jade3    | 2.45567 | 2.4962   | 0.0236183    | 0.90415  | 0.947103    | no  |
| Jagn1    | 16.1666 | 17.53    | 0.11681      | 0.51695  | 0.669604    | no  |
| Jak1     | 449.391 | 341.468  | -0.396222    | 0.0142   | 0.037055    | yes |
| Jak2     | 41.829  | 47.2737  | 0.176534     | 0.2125   | 0.352214    | no  |
| Jak3     | 85.4889 | 90.1714  | 0.0769335    | 0.59315  | 0.734229    | no  |
| Jakmip1  | 42.994  | 56.1904  | 0.386189     | 0.0081   | 0.022802    | yes |
| Jarid2   | 12.4796 | 12.6879  | 0.0238795    | 0.86995  | 0.926916    | no  |
| Jazf1    | 1.20848 | 0.991484 | -0.285531    | 0.3219   | 0.476807    | no  |
| Jdp2     | 5.5509  | 7.35872  | 0.406732     | 0.0435   | 0.0966968   | no  |
| Jkamp    | 16.2477 | 13.8126  | -0.234257    | 0.1547   | 0.273997    | no  |
| Jmjd1c   | 16.8861 | 18.3663  | 0.121225     | 0.389    | 0.548141    | no  |
| Jmjd4    | 4.33682 | 4.79312  | 0.144327     | 0.3982   | 0.557234    | no  |
| Jmjd6    | 35.8238 | 36.6711  | 0.0337241    | 0.8248   | 0.899228    | no  |
| Jmjd7    | 13.1122 | 13.7767  | 0.071327     | 0.7845   | 0.873796    | no  |
| Jmjd8    | 10.5506 | 11.2287  | 0.0898656    | 0.7555   | 0.854083    | no  |
| Jmy      | 3.19416 | 3.41198  | 0.0951723    | 0.55205  | 0.699711    | no  |
| Josd1    | 13.3456 | 15.9301  | 0.255393     | 0.088    | 0.173998    | no  |
| Josd2    | 30.5209 | 27.6893  | -0.140471    | 0.4106   | 0.569505    | no  |
| Jtb      | 66.6754 | 69.6803  | 0.0635958    | 0.6685   | 0.793209    | no  |
| Jun      | 63.0886 | 80.1364  | 0.345079     | 0.01695  | 0.043162    | yes |
| Junb     | 392.485 | 419.784  | 0.0970109    | 0.50355  | 0.657666    | no  |
| Jund     | 140.43  | 147.949  | 0.0752422    | 0.5969   | 0.737254    | no  |
| Jup      | 1.52924 | 0.36869  | -2.05233     | 5.00E-05 | 0.000236281 | yes |
| Kank3    | 0.9432  | 1.09652  | 0.2173       | 0.47475  | 0.631146    | no  |
| Kansl1   | 31.6804 | 33.1494  | 0.0653957    | 0.6424   | 0.773482    | no  |
| Kansl1l  | 2.22323 | 2.44105  | 0.134845     | 0.7037   | 0.818479    | no  |
| Kansl2   | 18.187  | 20.1831  | 0.150241     | 0.30875  | 0.462081    | no  |
| Kansl3   | 20.4999 | 20.9478  | 0.0311809    | 0.83265  | 0.903961    | no  |
| Kars     | 90.0772 | 81.2513  | -0.14877     | 0.29585  | 0.447481    | no  |

|         |          |         |             |          |             |     |
|---------|----------|---------|-------------|----------|-------------|-----|
| Kat2a   | 20.2544  | 23.2307 | 0.1978      | 0.1808   | 0.310417    | no  |
| Kat2b   | 12.174   | 13.0963 | 0.105363    | 0.4905   | 0.645459    | no  |
| Kat5    | 29.3798  | 25.8421 | -0.1851     | 0.226    | 0.368677    | no  |
| Kat6a   | 28.3487  | 28.9162 | 0.028596    | 0.839    | 0.907699    | no  |
| Kat6b   | 2.93351  | 3.42614 | 0.223956    | 0.17285  | 0.299433    | no  |
| Kat7    | 21.3046  | 18.7678 | -0.18291    | 0.20175  | 0.338329    | no  |
| Kat8    | 17.4887  | 18.9517 | 0.115902    | 0.48305  | 0.638632    | no  |
| Katna1  | 47.1937  | 40.4453 | -0.222623   | 0.1288   | 0.237263    | no  |
| Katna1  | 0.883186 | 1.13581 | 0.362931    | 0.1193   | 0.223229    | no  |
| Katnb1  | 23.8032  | 19.5752 | -0.282128   | 0.0529   | 0.114005    | no  |
| Katnb1  | 4.94194  | 4.20364 | -0.233436   | 0.22165  | 0.363302    | no  |
| Kbtbd11 | 33.407   | 52.5072 | 0.652367    | 5.00E-05 | 0.000236281 | yes |
| Kbtbd2  | 27.0779  | 25.5452 | -0.0840612  | 0.55595  | 0.702988    | no  |
| Kbtbd3  | 4.40991  | 4.36317 | -0.0153743  | 0.9395   | 0.96725     | no  |
| Kbtbd4  | 12.0684  | 11.3108 | -0.0935333  | 0.57215  | 0.716464    | no  |
| Kbtbd7  | 3.51435  | 3.23167 | -0.120979   | 0.49965  | 0.653879    | no  |
| Kbtbd8  | 1.6902   | 1.78281 | 0.0769544   | 0.717    | 0.82766     | no  |
| Kcmf1   | 20.7301  | 20.2607 | -0.0330406  | 0.82675  | 0.900589    | no  |
| Kcna3   | 12.1293  | 18.1602 | 0.582281    | 3.00E-04 | 0.00122185  | yes |
| Kcnab2  | 162.846  | 144.592 | -0.171519   | 0.23345  | 0.377445    | no  |
| Kcnc1   | 0.661138 | 1.39142 | 1.07353     | 5.00E-05 | 0.000236281 | yes |
| Kcnj8   | 7.84622  | 2.49032 | -1.65567    | 5.00E-05 | 0.000236281 | yes |
| Kcnk5   | 29.6901  | 23.9427 | -0.310397   | 0.0314   | 0.073338    | no  |
| Kcnk6   | 4.20777  | 4.28657 | 0.0267703   | 0.88165  | 0.933705    | no  |
| Kcnk7   | 3.34231  | 2.67203 | -0.322906   | 0.27675  | 0.425791    | no  |
| Kcnmb4  | 1.243    | 1.49047 | 0.261939    | 0.55195  | 0.699659    | no  |
| Kcnn4   | 61.0591  | 71.1041 | 0.219727    | 0.12315  | 0.228808    | no  |
| Kctd1   | 2.49978  | 2.38165 | -0.0698427  | 0.752    | 0.851846    | no  |
| Kctd10  | 48.7219  | 48.6091 | -0.00334483 | 0.9804   | 0.988791    | no  |
| Kctd11  | 1.87838  | 2.06767 | 0.138521    | 0.57225  | 0.716538    | no  |
| Kctd12  | 1.14323  | 2.88713 | 1.33653     | 5.00E-05 | 0.000236281 | yes |
| Kctd13  | 10.8054  | 11.1752 | 0.04855     | 0.7863   | 0.874903    | no  |
| Kctd17  | 5.53386  | 4.90175 | -0.17499    | 0.4135   | 0.572369    | no  |
| Kctd18  | 17.2269  | 17.0223 | -0.0172323  | 0.91115  | 0.95123     | no  |
| Kctd2   | 36.577   | 28.2787 | -0.371221   | 0.0144   | 0.0375076   | yes |
| Kctd20  | 33.7078  | 30.96   | -0.122675   | 0.3997   | 0.558712    | no  |
| Kctd3   | 6.54763  | 6.73548 | 0.0408069   | 0.80825  | 0.888943    | no  |
| Kctd5   | 18.035   | 17.58   | -0.0368647  | 0.81295  | 0.891805    | no  |
| Kctd6   | 2.61908  | 2.37687 | -0.139996   | 0.60205  | 0.7415      | no  |
| Kctd9   | 13.2884  | 11.7868 | -0.172991   | 0.26035  | 0.406127    | no  |
| Kdelc1  | 4.0879   | 5.17819 | 0.34109     | 0.0882   | 0.17434     | no  |
| Kdelc2  | 2.47604  | 2.82141 | 0.188384    | 0.35645  | 0.514225    | no  |
| Kdelr1  | 52.9538  | 44.0545 | -0.265443   | 0.06875  | 0.141667    | no  |
| Kdelr2  | 18.5186  | 17.7089 | -0.0645001  | 0.68695  | 0.806774    | no  |
| Kdm1a   | 29.3778  | 30.2746 | 0.0433797   | 0.7625   | 0.85886     | no  |
| Kdm1b   | 10.9462  | 10.7279 | -0.0290661  | 0.93605  | 0.965275    | no  |
| Kdm2a   | 24.5065  | 27.6873 | 0.176059    | 0.21135  | 0.350777    | no  |
| Kdm2b   | 14.9094  | 13.5693 | -0.135881   | 0.37445  | 0.533142    | no  |
| Kdm3a   | 29.101   | 28.6087 | -0.0246156  | 0.86655  | 0.924804    | no  |
| Kdm3b   | 29.8829  | 32.2435 | 0.109689    | 0.43775  | 0.595736    | no  |
| Kdm4a   | 46.5902  | 48.2123 | 0.0493755   | 0.7281   | 0.835296    | no  |
| Kdm4b   | 12.7288  | 13.4066 | 0.0748454   | 0.621    | 0.756653    | no  |
| Kdm4c   | 17.2982  | 17.1776 | -0.0100875  | 0.94565  | 0.970482    | no  |
| Kdm5a   | 17.3575  | 18.4335 | 0.086771    | 0.55485  | 0.702062    | no  |
| Kdm5b   | 5.65317  | 6.97652 | 0.303447    | 0.053    | 0.1142      | no  |
| Kdm5c   | 13.5679  | 13.5066 | -0.00652722 | 0.9625   | 0.979895    | no  |
| Kdm5d   | 13.0888  | 12.4625 | -0.0707341  | 0.6284   | 0.76234     | no  |

|           |          |         |            |          |             |     |
|-----------|----------|---------|------------|----------|-------------|-----|
| Kdm6a     | 14.3797  | 15.3831 | 0.0973125  | 0.49975  | 0.653973    | no  |
| Kdm6b     | 6.62932  | 6.69162 | 0.0134963  | 0.93275  | 0.963294    | no  |
| Kdm7a     | 15.8476  | 17.2699 | 0.124001   | 0.37735  | 0.536232    | no  |
| Kdm8      | 5.74159  | 4.38696 | -0.388229  | 0.0465   | 0.102286    | no  |
| Kdsr      | 3.72473  | 4.23848 | 0.186411   | 0.2713   | 0.419307    | no  |
| Keap1     | 28.9377  | 26.3877 | -0.133088  | 0.356    | 0.513775    | no  |
| Khdc3     | 1.67234  | 1.62284 | -0.0433481 | 0.88655  | 0.936435    | no  |
| Khdrbs1   | 73.6272  | 74.8628 | 0.0240103  | 0.8654   | 0.92408     | no  |
| Khk       | 4.17155  | 4.22206 | 0.0173624  | 0.95115  | 0.973847    | no  |
| Khbyn     | 35.3303  | 36.8189 | 0.0595423  | 0.6756   | 0.798466    | no  |
| Khsrp     | 33.3956  | 33.5369 | 0.00609211 | 0.9666   | 0.981874    | no  |
| Kidins220 | 32.7401  | 31.9071 | -0.0371802 | 0.78895  | 0.876884    | no  |
| Kif11     | 28.3436  | 15.8706 | -0.836668  | 5.00E-05 | 0.000236281 | yes |
| Kif13b    | 9.79984  | 10.8607 | 0.148287   | 0.3314   | 0.487087    | no  |
| Kif14     | 3.37121  | 2.09173 | -0.688568  | 5.00E-05 | 0.000236281 | yes |
| Kif15     | 10.9386  | 5.84334 | -0.904558  | 5.00E-05 | 0.000236281 | yes |
| Kif16b    | 5.58922  | 5.49179 | -0.0253718 | 0.8781   | 0.931847    | no  |
| Kif18a    | 4.59938  | 2.60918 | -0.817846  | 5.00E-05 | 0.000236281 | yes |
| Kif18b    | 12.1411  | 6.49798 | -0.901839  | 5.00E-05 | 0.000236281 | yes |
| Kif1b     | 7.35797  | 7.25863 | -0.0196095 | 0.89555  | 0.941854    | no  |
| Kif1c     | 14.9887  | 14.7451 | -0.0236392 | 0.86775  | 0.925637    | no  |
| Kif20a    | 15.4336  | 8.12216 | -0.926139  | 0.0189   | 0.0474682   | yes |
| Kif20b    | 7.08616  | 5.31859 | -0.41396   | 0.0089   | 0.0247598   | yes |
| Kif21b    | 126.013  | 112.091 | -0.168898  | 0.25765  | 0.402877    | no  |
| Kif22     | 30.2662  | 18.9324 | -0.676849  | 5.00E-05 | 0.000236281 | yes |
| Kif23     | 19.9777  | 13.5893 | -0.555916  | 0.00035  | 0.0014053   | yes |
| Kif2a     | 28.9455  | 26.9372 | -0.103735  | 0.46915  | 0.625787    | no  |
| Kif2c     | 10.312   | 5.29247 | -0.962316  | 5.00E-05 | 0.000236281 | yes |
| Kif3b     | 18.8151  | 19.3843 | 0.0429949  | 0.76015  | 0.857308    | no  |
| Kif3c     | 3.08631  | 2.95988 | -0.0603405 | 0.7699   | 0.863818    | no  |
| Kif4      | 7.53625  | 4.02408 | -0.905187  | 5.00E-05 | 0.000236281 | yes |
| Kif5b     | 42.3411  | 43.9588 | 0.0540933  | 0.70235  | 0.817447    | no  |
| Kif7      | 1.05841  | 1.31858 | 0.317087   | 0.44295  | 0.600774    | no  |
| Kifap3    | 0.551297 | 1.15877 | 1.0717     | 0.00055  | 0.0021091   | yes |
| Kifc1     | 16.002   | 9.4599  | -0.758352  | 5.00E-05 | 0.000236281 | yes |
| Kifc2     | 3.66444  | 3.8631  | 0.0761696  | 0.6956   | 0.812956    | no  |
| Kifc5b    | 4.36593  | 2.83476 | -0.62306   | 0.0029   | 0.00927196  | yes |
| Kin       | 27.4784  | 28.6967 | 0.0625873  | 0.6909   | 0.809662    | no  |
| Kiz       | 7.55908  | 7.86061 | 0.0564315  | 0.7538   | 0.852913    | no  |
| Klc1      | 33.6256  | 32.2554 | -0.0600208 | 0.6968   | 0.813846    | no  |
| Klc2      | 4.58979  | 4.85259 | 0.080328   | 0.66905  | 0.793649    | no  |
| Klc3      | 5.82891  | 5.95821 | 0.031653   | 0.93165  | 0.962679    | no  |
| Klc4      | 8.97639  | 8.37773 | -0.0995747 | 0.5615   | 0.707609    | no  |
| Klf10     | 15.8715  | 12.7186 | -0.3195    | 0.03715  | 0.0845382   | no  |
| Klf11     | 6.63904  | 5.99721 | -0.146685  | 0.38015  | 0.539169    | no  |
| Klf12     | 1.65996  | 2.53306 | 0.609734   | 0.00235  | 0.00770045  | yes |
| Klf13     | 50.2875  | 55.5564 | 0.143752   | 0.30785  | 0.461086    | no  |
| Klf16     | 13.9726  | 13.091  | -0.0940176 | 0.5496   | 0.697721    | no  |
| Klf2      | 311.208  | 261.292 | -0.252216  | 0.0736   | 0.149776    | no  |
| Klf3      | 83.6964  | 79.2611 | -0.0785515 | 0.5775   | 0.721078    | no  |
| Klf4      | 6.25354  | 12.574  | 1.0077     | 5.00E-05 | 0.000236281 | yes |
| Klf6      | 110.496  | 123.205 | 0.157062   | 0.2692   | 0.416947    | no  |
| Klf7      | 8.24322  | 8.8888  | 0.108781   | 0.5898   | 0.731493    | no  |
| Klf8      | 1.51809  | 1.71253 | 0.173873   | 0.43445  | 0.592628    | no  |
| Klhdc1    | 9.07095  | 13.4051 | 0.563459   | 0.0013   | 0.00454533  | yes |
| Klhdc10   | 5.03473  | 5.01758 | -0.0049216 | 0.975    | 0.986277    | no  |
| Klhdc2    | 20.3002  | 23.149  | 0.189459   | 0.225    | 0.367521    | no  |

|         |          |          |            |          |             |     |
|---------|----------|----------|------------|----------|-------------|-----|
| Klhdc3  | 29.2892  | 31.6628  | 0.112423   | 0.65795  | 0.785418    | no  |
| Klhdc4  | 25.6074  | 25.7678  | 0.00900723 | 0.9547   | 0.975769    | no  |
| Klhdc8b | 0.837979 | 1.06491  | 0.345747   | 0.5763   | 0.720115    | no  |
| Klhl11  | 6.3263   | 6.49328  | 0.0375849  | 0.8364   | 0.906302    | no  |
| Klhl12  | 6.1358   | 6.83865  | 0.156461   | 0.3643   | 0.522559    | no  |
| Klhl15  | 2.35292  | 2.51109  | 0.0938592  | 0.69165  | 0.810231    | no  |
| Klhl17  | 11.2753  | 13.4681  | 0.256382   | 0.09785  | 0.189967    | no  |
| Klhl18  | 10.2467  | 10.1699  | -0.010851  | 0.94425  | 0.969778    | no  |
| Klhl2   | 8.59375  | 9.46579  | 0.139435   | 0.38985  | 0.54901     | no  |
| Klhl20  | 15.678   | 15.2054  | -0.0441602 | 0.76965  | 0.863675    | no  |
| Klhl21  | 10.7559  | 11.8134  | 0.135306   | 0.37425  | 0.532911    | no  |
| Klhl22  | 4.34435  | 5.33165  | 0.295442   | 0.12015  | 0.224457    | no  |
| Klhl24  | 9.05399  | 8.74186  | -0.0506127 | 0.73845  | 0.842773    | no  |
| Klhl25  | 18.5066  | 17.8818  | -0.0495472 | 0.75055  | 0.850913    | no  |
| Klhl26  | 4.18793  | 4.38833  | 0.0674348  | 0.71715  | 0.827725    | no  |
| Klhl28  | 7.62515  | 7.42674  | -0.038037  | 0.82735  | 0.900881    | no  |
| Klhl3   | 1.32485  | 1.91893  | 0.534474   | 0.065    | 0.135282    | no  |
| Klhl36  | 9.97225  | 10.0824  | 0.0158501  | 0.92765  | 0.960543    | no  |
| Klhl42  | 3.38706  | 3.98982  | 0.236287   | 0.15745  | 0.277967    | no  |
| Klhl5   | 5.12813  | 6.75285  | 0.397065   | 0.02245  | 0.0551326   | no  |
| Klhl6   | 112.679  | 143.535  | 0.34918    | 0.01335  | 0.0351488   | yes |
| Klhl7   | 3.87429  | 4.51904  | 0.222084   | 0.2269   | 0.369786    | no  |
| Klhl8   | 1.1399   | 1.21421  | 0.0911213  | 0.73975  | 0.843547    | no  |
| Klhl9   | 13.3463  | 12.6176  | -0.0810099 | 0.59515  | 0.735853    | no  |
| Klk8    | 80.1699  | 93.7173  | 0.225254   | 0.11765  | 0.220704    | no  |
| Klra18  | 3.19025  | 1.20806  | -1.40098   | 0.0208   | 0.0516212   | no  |
| Klra3   | 15.1863  | 4.70211  | -1.69139   | 5.00E-05 | 0.000236281 | yes |
| Klra4   | 2.47711  | 0.408911 | -2.5988    | 0.02835  | 0.0673307   | no  |
| Klra7   | 1.72741  | 0.733294 | -1.23615   | 0.13985  | 0.252821    | no  |
| Klra8   | 3.88846  | 1.05909  | -1.87638   | 0.00655  | 0.0189418   | yes |
| Klra9   | 3.51878  | 1.04577  | -1.75051   | 0.01415  | 0.0369478   | yes |
| Klrb1c  | 18.5648  | 12.2267  | -0.602529  | 2.00E-04 | 0.0008488   | yes |
| Klrb1f  | 4.26934  | 3.53008  | -0.274315  | 0.2354   | 0.379737    | no  |
| Klrc1   | 311.846  | 236.621  | -0.398253  | 0.0053   | 0.0157596   | yes |
| Klrc2   | 21.3221  | 17.3186  | -0.300025  | 0.1322   | 0.242362    | no  |
| Klrc3   | 4.43949  | 4.05788  | -0.129667  | 0.69485  | 0.812442    | no  |
| Klrd1   | 613.561  | 590.895  | -0.0543051 | 0.70065  | 0.81633     | no  |
| Klre1   | 25.9599  | 3.77743  | -2.78081   | 5.00E-05 | 0.000236281 | yes |
| Klrg1   | 204.405  | 54.5997  | -1.90447   | 5.00E-05 | 0.000236281 | yes |
| Klrk1   | 208.414  | 228.868  | 0.135064   | 0.35825  | 0.516125    | no  |
| Kmt2a   | 30.3904  | 33.7814  | 0.152612   | 0.28775  | 0.438338    | no  |
| Kmt2b   | 30.1627  | 32.8523  | 0.123228   | 0.39045  | 0.549526    | no  |
| Kmt2c   | 11.4984  | 11.8782  | 0.0468846  | 0.74235  | 0.845433    | no  |
| Kmt2d   | 26.8441  | 30.4047  | 0.179693   | 0.21125  | 0.350677    | no  |
| Kmt2e   | 44.1549  | 46.7248  | 0.0816162  | 0.62285  | 0.758031    | no  |
| Knop1   | 5.19635  | 5.11241  | -0.0234961 | 0.8858   | 0.936091    | no  |
| Knstrn  | 12.3111  | 7.21931  | -0.770023  | 5.00E-05 | 0.000236281 | yes |
| Kntc1   | 3.60625  | 2.12107  | -0.765706  | 5.00E-05 | 0.000236281 | yes |
| Kpna1   | 17.9779  | 17.0486  | -0.0765696 | 0.59865  | 0.738692    | no  |
| Kpna2   | 72.3462  | 46.2859  | -0.644345  | 5.00E-05 | 0.000236281 | yes |
| Kpna3   | 13.2277  | 11.1941  | -0.240821  | 0.1116   | 0.211428    | no  |
| Kpna4   | 62.1615  | 58.7079  | -0.0824666 | 0.5604   | 0.706741    | no  |
| Kpna6   | 13.1002  | 12.3136  | -0.0893447 | 0.54125  | 0.690548    | no  |
| Kpnb1   | 59.764   | 60.0413  | 0.00667831 | 0.9629   | 0.980057    | no  |
| Kptn    | 17.4673  | 17.7244  | 0.0210852  | 0.8983   | 0.943664    | no  |
| Kras    | 21.219   | 18.8276  | -0.172507  | 0.23375  | 0.377757    | no  |
| Krba1   | 3.07789  | 4.49154  | 0.545269   | 0.0011   | 0.00391273  | yes |

|         |         |         |            |          |             |     |
|---------|---------|---------|------------|----------|-------------|-----|
| Krcc1   | 36.0505 | 37.2309 | 0.0464795  | 0.75485  | 0.853649    | no  |
| Kremen1 | 8.56633 | 9.61138 | 0.166065   | 0.28195  | 0.431833    | no  |
| Kremen2 | 5.19338 | 7.27649 | 0.486569   | 0.0129   | 0.0341475   | yes |
| Kri1    | 44.5673 | 45.927  | 0.0433555  | 0.80975  | 0.889968    | no  |
| Krit1   | 17.0402 | 17.3886 | 0.0291941  | 0.84365  | 0.910734    | no  |
| Krr1    | 10.1768 | 10.6403 | 0.0642514  | 0.80775  | 0.888614    | no  |
| Krtcap2 | 302.036 | 262.667 | -0.201485  | 0.16585  | 0.289911    | no  |
| Krtcap3 | 5.79169 | 6.5753  | 0.183071   | 0.91855  | 0.955437    | no  |
| Ksr1    | 10.7235 | 12.7956 | 0.254884   | 0.1015   | 0.195622    | no  |
| Kti12   | 27.8335 | 31.152  | 0.1625     | 0.3996   | 0.558606    | no  |
| Ktn1    | 8.85908 | 9.62471 | 0.119586   | 0.44005  | 0.598059    | no  |
| Kxd1    | 85.5719 | 75.2716 | -0.185031  | 0.201    | 0.337352    | no  |
| L1cam   | 10.1397 | 7.68796 | -0.399342  | 0.00955  | 0.0263592   | yes |
| L3mbtl2 | 18.7154 | 19.2122 | 0.0377945  | 0.7972   | 0.881985    | no  |
| L3mbtl3 | 13.9515 | 13.7412 | -0.0219179 | 0.88585  | 0.93613     | no  |
| l7Rn6   | 36.2447 | 35.4535 | -0.0318434 | 0.84435  | 0.91128     | no  |
| Lace1   | 3.10488 | 2.65568 | -0.225458  | 0.3171   | 0.47123     | no  |
| Lactb   | 14.5668 | 11.9    | -0.291717  | 0.08075  | 0.161826    | no  |
| Lactb2  | 16.7618 | 14.6386 | -0.195397  | 0.22885  | 0.372002    | no  |
| Lag3    | 26.1781 | 27.9025 | 0.0920315  | 0.54975  | 0.697811    | no  |
| Lage3   | 32.7882 | 33.4826 | 0.0302372  | 0.8623   | 0.922218    | no  |
| Lair1   | 13.7559 | 12.1581 | -0.178134  | 0.24455  | 0.389617    | no  |
| Lamb3   | 1.76078 | 1.66562 | -0.0801584 | 0.71805  | 0.828439    | no  |
| Lamc1   | 12.8611 | 8.98734 | -0.517052  | 0.00025  | 0.00103712  | yes |
| Lamp1   | 93.1886 | 95.9348 | 0.041901   | 0.76665  | 0.861583    | no  |
| Lamp2   | 14.6775 | 15.8946 | 0.114932   | 0.4926   | 0.647329    | no  |
| Lamtor1 | 71.4623 | 73.0462 | 0.0316275  | 0.8311   | 0.903098    | no  |
| Lamtor2 | 115.67  | 114.597 | -0.0134424 | 0.9278   | 0.960628    | no  |
| Lamtor3 | 38.3636 | 32.0408 | -0.259831  | 0.09505  | 0.185393    | no  |
| Lamtor4 | 73.3311 | 65.288  | -0.167609  | 0.2726   | 0.420846    | no  |
| Lamtor5 | 93.2422 | 83.6071 | -0.157357  | 0.2892   | 0.439977    | no  |
| Lancl1  | 6.90198 | 8.58519 | 0.314839   | 0.0448   | 0.0991463   | no  |
| Lancl2  | 2.17649 | 2.29367 | 0.075655   | 0.72175  | 0.831037    | no  |
| Lancl3  | 4.39273 | 5.92609 | 0.431962   | 0.01295  | 0.0342503   | yes |
| Lap3    | 7.69526 | 9.35812 | 0.282248   | 0.11065  | 0.210056    | no  |
| Laptm4a | 32.3739 | 27.9154 | -0.213771  | 0.1526   | 0.271025    | no  |
| Laptm5  | 1272.77 | 1150.94 | -0.145153  | 0.4081   | 0.566985    | no  |
| Larp1   | 34.8843 | 36.0973 | 0.049314   | 0.725    | 0.833216    | no  |
| Larp1b  | 9.53616 | 10.0508 | 0.0758261  | 0.6793   | 0.801283    | no  |
| Larp4   | 10.5761 | 12.1073 | 0.195061   | 0.18415  | 0.315026    | no  |
| Larp4b  | 18.4536 | 18.0709 | -0.030236  | 0.83495  | 0.905469    | no  |
| Larp7   | 39.7417 | 35.046  | -0.181404  | 0.2155   | 0.355883    | no  |
| Lars    | 18.9132 | 19.9616 | 0.0778316  | 0.59495  | 0.735708    | no  |
| Lars2   | 839.88  | 201.754 | -2.05758   | 5.00E-05 | 0.000236281 | yes |
| Las1l   | 19.3607 | 21.3172 | 0.138891   | 0.35495  | 0.512574    | no  |
| Lasp1   | 155.002 | 136.324 | -0.185251  | 0.20015  | 0.336253    | no  |
| Lat     | 601.718 | 589.657 | -0.0292119 | 0.8398   | 0.908203    | no  |
| Lat2    | 5.77193 | 10.3309 | 0.839842   | 5.00E-05 | 0.000236281 | yes |
| Lats1   | 7.70467 | 8.1863  | 0.0874788  | 0.56205  | 0.708062    | no  |
| Lats2   | 23.2638 | 19.222  | -0.275328  | 0.1217   | 0.226704    | no  |
| Lax1    | 125.615 | 125.755 | 0.00160837 | 0.9899   | 0.993885    | no  |
| Lbh     | 67.7498 | 69.2957 | 0.0325503  | 0.8193   | 0.895847    | no  |
| Lbr     | 108.381 | 109.928 | 0.0204539  | 0.88095  | 0.933257    | no  |
| Lca5    | 1.28134 | 2.22315 | 0.794949   | 0.00055  | 0.0021091   | yes |
| Lck     | 886.166 | 810.212 | -0.129277  | 0.4154   | 0.574143    | no  |
| Lclat1  | 1.7877  | 2.84941 | 0.672559   | 8.00E-04 | 0.0029486   | yes |
| Lcmt1   | 25.1345 | 20.363  | -0.303717  | 0.06415  | 0.133829    | no  |

|          |          |          |             |          |             |     |
|----------|----------|----------|-------------|----------|-------------|-----|
| Lcmt2    | 4.77137  | 5.30704  | 0.153503    | 0.47455  | 0.630963    | no  |
| Lcn4     | 17.6799  | 22.2576  | 0.332191    | 0.0846   | 0.16837     | no  |
| Lcor     | 1.71889  | 2.21609  | 0.366536    | 0.07785  | 0.15703     | no  |
| Lcorl    | 3.44748  | 2.78348  | -0.308652   | 0.3329   | 0.48865     | no  |
| Lcp1     | 603.755  | 592.55   | -0.0270263  | 0.87035  | 0.927079    | no  |
| Lcp2     | 133.221  | 134.601  | 0.0148762   | 0.91485  | 0.953387    | no  |
| Ldb1     | 138.898  | 131.356  | -0.080548   | 0.56145  | 0.707584    | no  |
| Ldha     | 348.662  | 336.109  | -0.0529002  | 0.7073   | 0.82111     | no  |
| Ldlr     | 3.2583   | 3.25568  | -0.00116138 | 0.994    | 0.996202    | no  |
| Ldlrad4  | 2.744    | 2.90052  | 0.0800345   | 0.72075  | 0.830387    | no  |
| Ldlrap1  | 17.2383  | 19.8502  | 0.203539    | 0.18055  | 0.310078    | no  |
| Ldoc1l   | 1.40555  | 2.05006  | 0.544531    | 0.0147   | 0.0381777   | yes |
| Lef1     | 34.83    | 40.9625  | 0.233973    | 0.11335  | 0.214042    | no  |
| Lemd2    | 26.209   | 24.9023  | -0.0737832  | 0.61915  | 0.755221    | no  |
| Lemd3    | 9.97653  | 10.9692  | 0.136846    | 0.36885  | 0.527403    | no  |
| Lenep    | 10.8515  | 8.49015  | -0.354038   | 0.1624   | 0.284981    | no  |
| Leng1    | 12.7258  | 12.7825  | 0.0064117   | 0.98515  | 0.991429    | no  |
| Leng8    | 52.6075  | 49.6319  | -0.0840006  | 0.5563   | 0.703241    | no  |
| Leng9    | 5.08903  | 4.85758  | -0.0671541  | 0.75625  | 0.854548    | no  |
| Leo1     | 11.2574  | 11.3159  | 0.00747228  | 0.96475  | 0.9808      | no  |
| Lepre1   | 1.67245  | 1.38278  | -0.274397   | 0.2718   | 0.419896    | no  |
| Leprel4  | 2.99034  | 0.968667 | -1.62624    | 5.00E-05 | 0.000236281 | yes |
| Leprot   | 38.8647  | 39.2667  | 0.0148442   | 0.9191   | 0.955826    | no  |
| Leprotl1 | 94.7796  | 89.3565  | -0.0850044  | 0.545    | 0.693702    | no  |
| Letm1    | 30.2994  | 29.1055  | -0.0579969  | 0.686    | 0.806087    | no  |
| Letm2    | 4.55316  | 5.30136  | 0.219495    | 0.27875  | 0.428224    | no  |
| Letmd1   | 22.3961  | 20.7293  | -0.111577   | 0.4568   | 0.61433     | no  |
| Lfng     | 230.455  | 206.878  | -0.155705   | 0.27395  | 0.422477    | no  |
| Lgals1   | 2005.35  | 1544     | -0.377183   | 0.0127   | 0.0336825   | yes |
| Lgals3   | 133.488  | 124.205  | -0.103986   | 0.4686   | 0.625278    | no  |
| Lgals3bp | 78.2139  | 87.5558  | 0.162779    | 0.2555   | 0.400375    | no  |
| Lgals4   | 14.8929  | 15.5807  | 0.0651401   | 0.7255   | 0.8336      | no  |
| Lgals6   | 0.805339 | 1.21311  | 0.591043    | 0.7497   | 0.850401    | no  |
| Lgals8   | 31.079   | 29.9457  | -0.0535885  | 0.71635  | 0.827357    | no  |
| Lgals9   | 122.394  | 117.823  | -0.0549042  | 0.70165  | 0.816974    | no  |
| Lgalsl   | 4.87138  | 4.83655  | -0.010352   | 0.95325  | 0.974964    | no  |
| Lhpp     | 0.829109 | 1.25184  | 0.59442     | 0.1266   | 0.234023    | no  |
| Lias     | 18.941   | 18.5849  | -0.0273763  | 0.8661   | 0.924505    | no  |
| Lig1     | 24.4955  | 14.7092  | -0.735798   | 5.00E-05 | 0.000236281 | yes |
| Lig3     | 6.48926  | 7.44539  | 0.198294    | 0.2684   | 0.415936    | no  |
| Lig4     | 2.11675  | 2.19377  | 0.0515669   | 0.80835  | 0.889011    | no  |
| Lilrb4   | 10.717   | 11.0702  | 0.0467785   | 0.80485  | 0.886917    | no  |
| Limd1    | 42.7381  | 42.8367  | 0.00332603  | 0.98105  | 0.989178    | no  |
| Limd2    | 220.518  | 240.552  | 0.125449    | 0.3836   | 0.542666    | no  |
| Lime1    | 192.711  | 183.636  | -0.069586   | 0.6263   | 0.76076     | no  |
| Limk1    | 16.2802  | 16.9681  | 0.0597052   | 0.69105  | 0.809743    | no  |
| Limk2    | 26.5125  | 31.8728  | 0.265656    | 0.06485  | 0.135026    | no  |
| Lims1    | 27.1492  | 23.8529  | -0.186745   | 0.19395  | 0.328101    | no  |
| Lin37    | 37.3076  | 37.0047  | -0.0117598  | 0.9413   | 0.968242    | no  |
| Lin52    | 6.7013   | 6.84605  | 0.0308311   | 0.86365  | 0.923007    | no  |
| Lin54    | 3.89836  | 3.24591  | -0.264243   | 0.1364   | 0.248314    | no  |
| Lin7c    | 25.2251  | 25.9373  | 0.0401688   | 0.7796   | 0.870399    | no  |
| Lin9     | 6.14977  | 5.4704   | -0.168886   | 0.375    | 0.533699    | no  |
| Lins     | 2.25167  | 2.86073  | 0.345385    | 0.06705  | 0.138698    | no  |
| Lipa     | 22.9174  | 20.5908  | -0.154446   | 0.29915  | 0.451292    | no  |
| Lipe     | 1.82613  | 2.09199  | 0.196087    | 0.4213   | 0.579687    | no  |
| Lipo1    | 1.30425  | 1.22929  | -0.0853918  | 0.7552   | 0.853895    | no  |

|           |         |         |            |          |            |     |
|-----------|---------|---------|------------|----------|------------|-----|
| Lipt1     | 1.11368 | 1.95242 | 0.809924   | 0.02225  | 0.0547157  | no  |
| Litaf     | 7.06679 | 4.56188 | -0.631429  | 0.0015   | 0.00516454 | yes |
| Lgl1      | 16.5736 | 15.5626 | -0.0908028 | 0.781    | 0.871204   | no  |
| Lgl2      | 11.9335 | 12.5917 | 0.0774509  | 0.61935  | 0.755399   | no  |
| Llph      | 64.2522 | 66.6007 | 0.051791   | 0.71625  | 0.827322   | no  |
| Lman1     | 10.8826 | 10.253  | -0.085975  | 0.6273   | 0.761556   | no  |
| Lman2     | 50.2446 | 59.8914 | 0.25338    | 0.0727   | 0.148354   | no  |
| Lman2l    | 6.41685 | 6.00144 | -0.0965549 | 0.60835  | 0.746264   | no  |
| Lmbr1l    | 43.6187 | 45.2934 | 0.0543534  | 0.7081   | 0.821714   | no  |
| Lmbrd1    | 6.4448  | 5.20866 | -0.307223  | 0.0564   | 0.120485   | no  |
| Lmbrd2    | 2.52161 | 2.37992 | -0.0834303 | 0.74675  | 0.848431   | no  |
| Lmf1      | 10.6119 | 10.9728 | 0.0482477  | 0.78315  | 0.872788   | no  |
| Lmf2      | 28.6463 | 26.3588 | -0.12006   | 0.4073   | 0.566107   | no  |
| Lmna      | 2.22412 | 2.92368 | 0.394552   | 0.11875  | 0.222359   | no  |
| Lmnb1     | 118.345 | 79.9761 | -0.565363  | 2.00E-04 | 0.0008488  | yes |
| Lmnb2     | 6.78816 | 6.87026 | 0.0173447  | 0.9191   | 0.955826   | no  |
| Lmo4      | 9.92143 | 9.81341 | -0.0157929 | 0.93265  | 0.963275   | no  |
| Lmtk2     | 8.57186 | 9.20445 | 0.102724   | 0.48195  | 0.637536   | no  |
| Lmtk3     | 1.39497 | 1.8847  | 0.434099   | 0.04315  | 0.0960307  | no  |
| Lnp       | 3.36505 | 2.99993 | -0.165701  | 0.30835  | 0.461609   | no  |
| Lnpep     | 50.2496 | 51.2076 | 0.0272447  | 0.84295  | 0.910312   | no  |
| Lnx1      | 1.98351 | 1.51001 | -0.3935    | 0.68525  | 0.805608   | no  |
| Lnx2      | 12.4387 | 12.35   | -0.0103279 | 0.94245  | 0.968776   | no  |
| LOC547349 | 2.0752  | 1.68135 | -0.303633  | 0.86945  | 0.926554   | no  |
| Loh12cr1  | 13.2702 | 11.4419 | -0.21387   | 0.21445  | 0.354638   | no  |
| Lonp1     | 19.0514 | 20.1232 | 0.0789642  | 0.598    | 0.738122   | no  |
| Lonp2     | 49.1546 | 47.61   | -0.0460622 | 0.74965  | 0.850399   | no  |
| Lpar2     | 2.23338 | 2.53699 | 0.183888   | 0.32245  | 0.477382   | no  |
| Lpar5     | 12.6481 | 14.6328 | 0.210291   | 0.23805  | 0.382839   | no  |
| Lpar6     | 25.5149 | 26.3576 | 0.0468813  | 0.83725  | 0.906751   | no  |
| Lpcat1    | 8.31172 | 7.46867 | -0.154296  | 0.4206   | 0.579096   | no  |
| Lpcat3    | 12.8807 | 13.1414 | 0.0289144  | 0.9314   | 0.962533   | no  |
| Lpcat4    | 51.5546 | 62.5    | 0.277756   | 0.05255  | 0.113396   | no  |
| Lpgat1    | 6.77157 | 7.36489 | 0.121176   | 0.42545  | 0.583838   | no  |
| Lphn1     | 11.1471 | 11.2144 | 0.00869273 | 0.9505   | 0.973421   | no  |
| Lpin1     | 24.0644 | 17.1235 | -0.49092   | 0.00045  | 0.0017621  | yes |
| Lpin2     | 10.6134 | 12.4172 | 0.226451   | 0.1234   | 0.2292     | no  |
| Lpp       | 2.25632 | 2.21616 | -0.0259067 | 0.8789   | 0.932261   | no  |
| Lpxn      | 81.778  | 82.1849 | 0.00715982 | 0.9581   | 0.97746    | no  |
| Lrba      | 12.1002 | 12.3062 | 0.0243496  | 0.86695  | 0.925021   | no  |
| Lrch1     | 14.0563 | 13.7232 | -0.0345999 | 0.81235  | 0.891521   | no  |
| Lrch3     | 17.9978 | 18.7157 | 0.0564344  | 0.73385  | 0.839409   | no  |
| Lrch4     | 87.7362 | 80.7767 | -0.119233  | 0.523    | 0.674765   | no  |
| Lrif1     | 18.5412 | 17.9411 | -0.0474668 | 0.78215  | 0.872073   | no  |
| Lrig2     | 5.7096  | 5.83582 | 0.0315451  | 0.83615  | 0.906116   | no  |
| Lrmp      | 94.2263 | 81.6043 | -0.207486  | 0.13955  | 0.252356   | no  |
| Lrp10     | 118.11  | 120.063 | 0.0236591  | 0.86765  | 0.925544   | no  |
| Lrp5      | 1.187   | 1.84537 | 0.636594   | 0.0037   | 0.0114853  | yes |
| Lrp6      | 3.25672 | 3.53193 | 0.117037   | 0.4586   | 0.616081   | no  |
| Lrp8      | 2.12471 | 1.38971 | -0.612483  | 0.00175  | 0.00592472 | yes |
| Lrpap1    | 17.3171 | 17.9532 | 0.0520402  | 0.7344   | 0.839821   | no  |
| Lrpprc    | 12.4688 | 13.6202 | 0.127425   | 0.392    | 0.551114   | no  |
| Lrr1      | 2.74789 | 1.45642 | -0.915897  | 0.0053   | 0.0157596  | yes |
| Lrrc1     | 2.49514 | 2.85572 | 0.194736   | 0.3585   | 0.516359   | no  |
| Lrrc14    | 7.18512 | 7.7563  | 0.110356   | 0.5383   | 0.688066   | no  |
| Lrrc20    | 2.85249 | 2.95206 | 0.0495013  | 0.82425  | 0.898947   | no  |
| Lrrc23    | 2.08864 | 3.72597 | 0.835051   | 0.0038   | 0.0117554  | yes |

|         |         |          |             |          |             |     |
|---------|---------|----------|-------------|----------|-------------|-----|
| Lrrc28  | 6.07539 | 5.56928  | -0.125485   | 0.49785  | 0.6522      | no  |
| Lrrc29  | 1.29552 | 0.899984 | -0.525563   | 0.13285  | 0.243238    | no  |
| Lrrc39  | 1.13455 | 1.19765  | 0.0780896   | 0.89025  | 0.938598    | no  |
| Lrrc40  | 5.04599 | 4.53813  | -0.153042   | 0.4161   | 0.574784    | no  |
| Lrrc41  | 9.42267 | 10.4421  | 0.148209    | 0.46385  | 0.6209      | no  |
| Lrrc42  | 13.1529 | 12.858   | -0.0327244  | 0.84535  | 0.91169     | no  |
| Lrrc45  | 13.0254 | 12.5134  | -0.0578504  | 0.7173   | 0.827817    | no  |
| Lrrc47  | 27.0766 | 27.5483  | 0.0249166   | 0.87905  | 0.932336    | no  |
| Lrrc51  | 1.38115 | 1.37558  | -0.00583507 | 0.98915  | 0.993584    | no  |
| Lrrc56  | 2.08827 | 2.51437  | 0.26789     | 0.3517   | 0.509047    | no  |
| Lrrc57  | 17.0052 | 14.6318  | -0.216868   | 0.3161   | 0.47011     | no  |
| Lrrc58  | 4.13861 | 4.63003  | 0.161875    | 0.2963   | 0.447988    | no  |
| Lrrc59  | 32.3486 | 31.7964  | -0.0248386  | 0.8679   | 0.925713    | no  |
| Lrrc61  | 16.4289 | 15.8215  | -0.0543486  | 0.7247   | 0.83302     | no  |
| Lrrc8a  | 21.3674 | 21.7545  | 0.0259033   | 0.8581   | 0.919819    | no  |
| Lrrc8b  | 4.1632  | 3.50637  | -0.247716   | 0.20995  | 0.348979    | no  |
| Lrrc8c  | 67.0104 | 60.5151  | -0.147089   | 0.29765  | 0.449577    | no  |
| Lrrc8d  | 5.7852  | 8.47649  | 0.5511      | 0.001    | 0.00359708  | yes |
| Lrrcc1  | 7.64547 | 7.66196  | 0.00310815  | 0.98405  | 0.990703    | no  |
| Lrrfip1 | 135.659 | 139.497  | 0.040252    | 0.78065  | 0.871034    | no  |
| Lrrfip2 | 8.62608 | 6.37353  | -0.436611   | 0.0085   | 0.0237772   | yes |
| Lrrk1   | 13.9825 | 7.82052  | -0.838289   | 5.00E-05 | 0.000236281 | yes |
| Lrsam1  | 3.40538 | 3.00446  | -0.180713   | 0.54945  | 0.697593    | no  |
| Lrwd1   | 46.8078 | 49.3607  | 0.0766151   | 0.59125  | 0.732493    | no  |
| Lsg1    | 24.1894 | 25.2692  | 0.063005    | 0.67455  | 0.797572    | no  |
| Lsm1    | 14.8853 | 13.6628  | -0.123637   | 0.44115  | 0.59907     | no  |
| Lsm10   | 24.9354 | 23.9401  | -0.0587683  | 0.73645  | 0.841374    | no  |
| Lsm11   | 2.41151 | 2.21457  | -0.12291    | 0.50725  | 0.660896    | no  |
| Lsm12   | 35.2506 | 32.6769  | -0.10938    | 0.48305  | 0.638632    | no  |
| Lsm14a  | 96.5244 | 90.3499  | -0.0953707  | 0.49665  | 0.651172    | no  |
| Lsm14b  | 21.6241 | 22.1941  | 0.0375339   | 0.8026   | 0.885364    | no  |
| Lsm2    | 29.6776 | 27.4552  | -0.112296   | 0.5174   | 0.669941    | no  |
| Lsm3    | 68.6241 | 73.8721  | 0.106315    | 0.5072   | 0.660867    | no  |
| Lsm4    | 139.249 | 134.88   | -0.0459911  | 0.74995  | 0.850506    | no  |
| Lsm5    | 114.293 | 98.2957  | -0.21754    | 0.1767   | 0.304726    | no  |
| Lsm6    | 15.1132 | 13.1298  | -0.202969   | 0.1772   | 0.305439    | no  |
| Lsm7    | 82.7816 | 96.0887  | 0.215057    | 0.1944   | 0.328752    | no  |
| Lsm8    | 69.9238 | 66.5522  | -0.0712962  | 0.6478   | 0.777589    | no  |
| Lsp1    | 1119.48 | 1182.18  | 0.0786261   | 0.62365  | 0.758764    | no  |
| Lsr     | 2.06363 | 2.42301  | 0.231615    | 0.36465  | 0.522923    | no  |
| Lss     | 6.12999 | 7.66661  | 0.322705    | 0.0594   | 0.125854    | no  |
| Lst1    | 6.34815 | 4.81323  | -0.39933    | 0.3214   | 0.476267    | no  |
| Lta     | 4.48738 | 8.86519  | 0.982278    | 5.00E-05 | 0.000236281 | yes |
| Lta4h   | 80.4667 | 82.2294  | 0.0312629   | 0.82755  | 0.90096     | no  |
| Ltb     | 402.695 | 571.682  | 0.505525    | 0.00035  | 0.0014053   | yes |
| Ltb4r1  | 3.33473 | 1.76736  | -0.915972   | 0.00305  | 0.00969839  | yes |
| Ltk     | 3.67068 | 4.24545  | 0.209868    | 0.31655  | 0.470651    | no  |
| Ltn1    | 16.9962 | 16.6151  | -0.0327215  | 0.81395  | 0.89232     | no  |
| Ltv1    | 21.646  | 24.3962  | 0.172558    | 0.27365  | 0.422135    | no  |
| Luc7l   | 35.5394 | 37.6859  | 0.0846065   | 0.60095  | 0.740559    | no  |
| Luc7l2  | 78.3963 | 76.6913  | -0.0317239  | 0.8305   | 0.90271     | no  |
| Luc7l3  | 29.9993 | 27.4489  | -0.12818    | 0.3729   | 0.531546    | no  |
| Luzp1   | 1.26304 | 0.961541 | -0.393478   | 0.0629   | 0.131837    | no  |
| Lxn     | 22.7763 | 22.6624  | -0.00723008 | 0.9778   | 0.987609    | no  |
| Ly6a    | 269.323 | 316.047  | 0.230801    | 0.10065  | 0.194297    | no  |
| Ly6c1   | 12.6205 | 8.01624  | -0.654772   | 0.01075  | 0.0292077   | yes |
| Ly6c2   | 1934.05 | 1506.13  | -0.36078    | 0.01815  | 0.0458046   | yes |



|          |          |          |             |          |             |     |
|----------|----------|----------|-------------|----------|-------------|-----|
| Ly6e     | 352.058  | 468.893  | 0.413445    | 0.00445  | 0.0135244   | yes |
| Ly6g5b   | 2.69784  | 5.12572  | 0.925952    | 0.0028   | 0.00898766  | yes |
| Ly75     | 8.95015  | 12.7422  | 0.509635    | 7.00E-04 | 0.00261609  | yes |
| Ly9      | 146.876  | 132.985  | -0.143336   | 0.30885  | 0.462172    | no  |
| Ly96     | 5.16572  | 5.3983   | 0.0635354   | 0.8453   | 0.911678    | no  |
| Lyar     | 24.9534  | 22.1347  | -0.172929   | 0.2755   | 0.424367    | no  |
| Lypd6b   | 1.11061  | 2.12802  | 0.938165    | 0.0017   | 0.005774    | yes |
| Lypla1   | 58.9726  | 53.9117  | -0.129447   | 0.36325  | 0.521455    | no  |
| Lypla2   | 133.713  | 134.298  | 0.0062954   | 0.96295  | 0.980057    | no  |
| Lyrm1    | 6.92989  | 7.94059  | 0.196414    | 0.39565  | 0.554743    | no  |
| Lyrm2    | 23.768   | 23.2373  | -0.0325752  | 0.84365  | 0.910734    | no  |
| Lyrm4    | 5.56704  | 5.02652  | -0.147348   | 0.5041   | 0.658153    | no  |
| Lyrm5    | 10.5632  | 11.1175  | 0.0737947   | 0.69085  | 0.809616    | no  |
| Lyrm7    | 1.40367  | 1.32726  | -0.0807484  | 0.7932   | 0.879351    | no  |
| Lyrm9    | 3.36387  | 3.15477  | -0.0925876  | 0.6077   | 0.745817    | no  |
| Lysmd1   | 9.22335  | 9.7496   | 0.0800524   | 0.7981   | 0.882482    | no  |
| Lysmd2   | 9.39527  | 13.0935  | 0.478845    | 0.01415  | 0.0369478   | yes |
| Lysmd3   | 12.4607  | 12.4911  | 0.00351731  | 0.9799   | 0.988598    | no  |
| Lysmd4   | 3.05967  | 2.35023  | -0.380573   | 0.0723   | 0.147727    | no  |
| Lyst     | 11.9548  | 15.3052  | 0.356437    | 0.01205  | 0.0321932   | yes |
| Lzic     | 19.409   | 19.1735  | -0.0176177  | 0.91335  | 0.952555    | no  |
| Lztf1    | 3.37365  | 3.93233  | 0.221072    | 0.24975  | 0.395297    | no  |
| Lztr1    | 26.9541  | 24.8576  | -0.116815   | 0.4243   | 0.582645    | no  |
| M6pr     | 133.512  | 124.341  | -0.10267    | 0.46495  | 0.62196     | no  |
| Macf1    | 115.321  | 119.534  | 0.0517664   | 0.77205  | 0.865283    | no  |
| Macrod1  | 1.09315  | 1.29648  | 0.246109    | 0.54075  | 0.690147    | no  |
| Mad11    | 10.2504  | 8.78625  | -0.222356   | 0.1877   | 0.319913    | no  |
| Mad21    | 31.1607  | 20.997   | -0.569541   | 0.00035  | 0.0014053   | yes |
| Mad211bp | 34.3378  | 29.468   | -0.220647   | 0.1579   | 0.278622    | no  |
| Mad212   | 11.7561  | 11.4541  | -0.0375539  | 0.84625  | 0.912062    | no  |
| Madd     | 59.088   | 65.5757  | 0.150294    | 0.28615  | 0.436598    | no  |
| Maea     | 61.9464  | 56.8621  | -0.123552   | 0.3832   | 0.542264    | no  |
| Maf      | 1.96706  | 2.57177  | 0.38672     | 0.0761   | 0.154033    | no  |
| Maf1     | 90.6153  | 83.8108  | -0.112619   | 0.42925  | 0.587533    | no  |
| Mafa     | 1.08733  | 0.382736 | -1.50637    | 0.02295  | 0.0562099   | no  |
| Mafg     | 3.04045  | 3.42524  | 0.171918    | 0.48735  | 0.642511    | no  |
| Mafk     | 21.792   | 25.3967  | 0.220842    | 0.1383   | 0.250474    | no  |
| Maged2   | 1.07639  | 1.00711  | -0.0959864  | 0.77075  | 0.864428    | no  |
| Magee1   | 2.30222  | 1.91404  | -0.266402   | 0.2329   | 0.376806    | no  |
| Magi3    | 1.07451  | 0.813159 | -0.402074   | 0.0832   | 0.166033    | no  |
| Magoh    | 126.915  | 119.004  | -0.0928466  | 0.52785  | 0.679123    | no  |
| Magohb   | 24.1381  | 23.0002  | -0.0696663  | 0.7107   | 0.823553    | no  |
| Magt1    | 19.2745  | 16.2402  | -0.247128   | 0.0888   | 0.175271    | no  |
| Mak16    | 41.9132  | 43.4565  | 0.052167    | 0.7472   | 0.848683    | no  |
| Mal      | 0.38029  | 1.32995  | 1.8062      | 1.00E-04 | 0.000450026 | yes |
| Malsu1   | 17.7534  | 16.8028  | -0.0793887  | 0.68585  | 0.805965    | no  |
| Malt1    | 56.2412  | 52.8969  | -0.0884467  | 0.52855  | 0.679751    | no  |
| Maml1    | 13.886   | 13.9859  | 0.0103414   | 0.94385  | 0.969593    | no  |
| Maml2    | 12.5371  | 12.3799  | -0.0182054  | 0.9007   | 0.945017    | no  |
| Man1a    | 30.7336  | 28.5292  | -0.107377   | 0.44515  | 0.602843    | no  |
| Man1a2   | 10.3789  | 10.3322  | -0.00649695 | 0.96365  | 0.980388    | no  |
| Man1b1   | 26.0506  | 25.2334  | -0.0459824  | 0.74755  | 0.848903    | no  |
| Man1c1   | 0.748525 | 1.88954  | 1.33591     | 5.00E-05 | 0.000236281 | yes |
| Man2a1   | 30.614   | 34.1372  | 0.157152    | 0.2627   | 0.409024    | no  |
| Man2a2   | 12.239   | 15.5026  | 0.341026    | 0.01905  | 0.0477889   | yes |
| Man2b1   | 60.2853  | 56.3571  | -0.0972068  | 0.48895  | 0.643971    | no  |
| Man2b2   | 33.2129  | 34.0203  | 0.0346509   | 0.8061   | 0.887546    | no  |

|           |         |         |             |          |             |     |
|-----------|---------|---------|-------------|----------|-------------|-----|
| Man2c1    | 14.4003 | 17.0791 | 0.246133    | 0.10635  | 0.20326     | no  |
| Manba     | 15.226  | 15.3699 | 0.013574    | 0.92785  | 0.960632    | no  |
| Manbal    | 29.7743 | 28.4397 | -0.0661644  | 0.68635  | 0.806378    | no  |
| Manea     | 4.40004 | 4.05728 | -0.117004   | 0.50455  | 0.658618    | no  |
| Maneal    | 1.17356 | 1.06405 | -0.141325   | 0.8093   | 0.889668    | no  |
| Manf      | 48.7209 | 48.2583 | -0.0137658  | 0.92345  | 0.958246    | no  |
| Mansc1    | 1.22349 | 1.36548 | 0.158406    | 0.5849   | 0.727358    | no  |
| Map1lc3a  | 5.84483 | 5.60199 | -0.0612234  | 0.7962   | 0.88132     | no  |
| Map1lc3b  | 139.643 | 132.846 | -0.0719825  | 0.6016   | 0.741153    | no  |
| Map1s     | 15.3364 | 15.3685 | 0.00301387  | 0.98335  | 0.990366    | no  |
| Map2k1    | 44.2389 | 43.0438 | -0.0395104  | 0.78485  | 0.874089    | no  |
| Map2k2    | 56.0839 | 54.2727 | -0.047358   | 0.7407   | 0.844235    | no  |
| Map2k3    | 35.7456 | 35.1723 | -0.023325   | 0.87665  | 0.930896    | no  |
| Map2k4    | 23.1829 | 21.969  | -0.0775917  | 0.5932   | 0.734278    | no  |
| Map2k5    | 15.7483 | 17.5642 | 0.157446    | 0.3127   | 0.4664      | no  |
| Map2k6    | 9.34575 | 7.2308  | -0.370156   | 0.04135  | 0.0926      | no  |
| Map2k7    | 31.0793 | 30.9881 | -0.00423942 | 0.9779   | 0.987653    | no  |
| Map3k1    | 14.6799 | 14.4833 | -0.0194431  | 0.89065  | 0.938743    | no  |
| Map3k10   | 2.4038  | 2.52548 | 0.0712404   | 0.7273   | 0.834785    | no  |
| Map3k11   | 23.6617 | 24.1499 | 0.0294638   | 0.83525  | 0.905627    | no  |
| Map3k12   | 12.6294 | 11.3935 | -0.148566   | 0.6954   | 0.812803    | no  |
| Map3k14   | 13.1926 | 16.9905 | 0.364998    | 0.0147   | 0.0381777   | yes |
| Map3k15   | 1.29726 | 1.15861 | -0.16307    | 0.83365  | 0.904573    | no  |
| Map3k2    | 9.84954 | 9.73125 | -0.0174314  | 0.902    | 0.945889    | no  |
| Map3k3    | 28.596  | 32.0654 | 0.165203    | 0.24995  | 0.395436    | no  |
| Map3k4    | 9.84872 | 10.6678 | 0.11526     | 0.44265  | 0.600494    | no  |
| Map3k5    | 7.15253 | 9.79117 | 0.453027    | 0.00265  | 0.0085599   | yes |
| Map3k7    | 22.0144 | 20.6947 | -0.0891852  | 0.5355   | 0.685865    | no  |
| Map3k8    | 19.5628 | 18.7671 | -0.0599076  | 0.6964   | 0.813581    | no  |
| Map4      | 46.6388 | 43.8224 | -0.0898622  | 0.52285  | 0.674633    | no  |
| Map4k1    | 66.5659 | 62.4359 | -0.0924082  | 0.5074   | 0.661043    | no  |
| Map4k2    | 108.625 | 108.352 | -0.00363708 | 0.9816   | 0.989458    | no  |
| Map4k4    | 62.8823 | 65.9425 | 0.0685554   | 0.62665  | 0.760976    | no  |
| Map4k5    | 1.21764 | 1.13395 | -0.102729   | 0.8208   | 0.896737    | no  |
| Map7      | 1.49916 | 1.44522 | -0.0528638  | 0.82185  | 0.897384    | no  |
| Map7d1    | 53.6775 | 46.1113 | -0.219197   | 0.12225  | 0.227531    | no  |
| Mapk1     | 95.6478 | 90.3955 | -0.0814806  | 0.6125   | 0.749804    | no  |
| Mapk11    | 5.4152  | 10.0096 | 0.886301    | 5.00E-05 | 0.000236281 | yes |
| Mapk14    | 51.2001 | 49.1078 | -0.0601958  | 0.66965  | 0.79412     | no  |
| Mapk1ip1  | 10.5256 | 11.1035 | 0.077105    | 0.67015  | 0.79458     | no  |
| Mapk1ip1l | 29.7443 | 27.487  | -0.113865   | 0.4214   | 0.579802    | no  |
| Mapk3     | 40.0818 | 25.2425 | -0.667092   | 5.00E-05 | 0.000236281 | yes |
| Mapk6     | 25.6704 | 25.7387 | 0.00383     | 0.97855  | 0.987999    | no  |
| Mapk7     | 11.284  | 9.98336 | -0.176681   | 0.2751   | 0.423899    | no  |
| Mapk8     | 3.63635 | 3.8469  | 0.0812075   | 0.6365   | 0.768811    | no  |
| Mapk8ip3  | 33.6912 | 34.444  | 0.0318775   | 0.8278   | 0.901065    | no  |
| Mapk9     | 12.4701 | 11.5177 | -0.114627   | 0.44385  | 0.601637    | no  |
| Mapkap1   | 18.2318 | 18.9951 | 0.0591636   | 0.6951   | 0.812573    | no  |
| Mapkapk2  | 25.5758 | 24.4942 | -0.0623408  | 0.6778   | 0.800142    | no  |
| Mapkapk3  | 35.3119 | 34.3905 | -0.0381471  | 0.78665  | 0.875141    | no  |
| Mapkapk5  | 27.9684 | 28.0651 | 0.00498262  | 0.9736   | 0.985538    | no  |
| Mapkbp1   | 4.11061 | 4.35836 | 0.084433    | 0.59195  | 0.73318     | no  |
| Mapre1    | 37.4869 | 33.6053 | -0.157699   | 0.26455  | 0.411324    | no  |
| Mapre2    | 51.8936 | 43.0925 | -0.268121   | 0.05985  | 0.12667     | no  |
| Mapre3    | 2.16715 | 2.28686 | 0.0775705   | 0.7726   | 0.865678    | no  |
| 2-Mar     | 33.178  | 34.6375 | 0.0621083   | 0.6707   | 0.794951    | no  |
| 2-Mar     | 69.5209 | 68.6543 | -0.0180948  | 0.89595  | 0.942106    | no  |

|          |          |         |             |          |             |     |
|----------|----------|---------|-------------|----------|-------------|-----|
| 3-Mar    | 2.98123  | 3.53733 | 0.246752    | 0.31285  | 0.466535    | no  |
| 5-Mar    | 39.517   | 36.1884 | -0.126946   | 0.4604   | 0.617641    | no  |
| 6-Mar    | 19.7865  | 20.5391 | 0.0538542   | 0.70795  | 0.821648    | no  |
| 7-Mar    | 50.5139  | 53.2861 | 0.0770795   | 0.5847   | 0.727161    | no  |
| 9-Mar    | 1.81112  | 1.44919 | -0.321634   | 0.2682   | 0.415681    | no  |
| Marcks1  | 6.9489   | 5.47093 | -0.344998   | 0.0987   | 0.191302    | no  |
| Marf1    | 23.2537  | 22.9352 | -0.0198966  | 0.88825  | 0.937305    | no  |
| Mark2    | 63.1875  | 64.105  | 0.0207987   | 0.88295  | 0.934535    | no  |
| Mark3    | 33.8744  | 31.8587 | -0.088508   | 0.53855  | 0.688248    | no  |
| Mark4    | 14.873   | 15.58   | 0.0669951   | 0.67545  | 0.798329    | no  |
| Mars     | 24.9977  | 24.3366 | -0.0386669  | 0.81095  | 0.890677    | no  |
| Mars2    | 6.18763  | 6.68308 | 0.111128    | 0.5284   | 0.679633    | no  |
| Marveld1 | 12.6653  | 10.5569 | -0.262695   | 0.0977   | 0.189739    | no  |
| Marveld2 | 2.62187  | 4.11362 | 0.649811    | 0.0022   | 0.00725609  | yes |
| Mast2    | 5.13421  | 3.88854 | -0.400915   | 0.016    | 0.0410584   | yes |
| Mast3    | 50.5427  | 51.2902 | 0.021183    | 0.8847   | 0.935461    | no  |
| Mast4    | 0.680239 | 1.09822 | 0.691058    | 0.00115  | 0.00407292  | yes |
| Mastl    | 2.59966  | 1.39264 | -0.900499   | 5.00E-05 | 0.000236281 | yes |
| Mat2a    | 40.9759  | 41.2656 | 0.010164    | 0.94425  | 0.969778    | no  |
| Mat2b    | 95.5828  | 85.7192 | -0.157132   | 0.27035  | 0.41826     | no  |
| Matk     | 9.18328  | 9.23017 | 0.00734672  | 0.96685  | 0.981973    | no  |
| Matr3    | 51.4468  | 50.7411 | -0.0199273  | 0.88705  | 0.936711    | no  |
| Mau2     | 30.0236  | 30.1105 | 0.00417069  | 0.97635  | 0.986921    | no  |
| Mavs     | 13.6041  | 13.3414 | -0.0281353  | 0.85405  | 0.917261    | no  |
| Max      | 48.743   | 49.0858 | 0.0101108   | 0.9441   | 0.969778    | no  |
| Maz      | 123.16   | 123.537 | 0.00441594  | 0.97455  | 0.986118    | no  |
| Mb21d1   | 4.37848  | 3.31388 | -0.401908   | 0.0273   | 0.0652033   | no  |
| Mbd1     | 21.7761  | 22.0951 | 0.0209768   | 0.88825  | 0.937305    | no  |
| Mbd2     | 188.417  | 176.816 | -0.091679   | 0.5205   | 0.672573    | no  |
| Mbd3     | 58.0683  | 54.693  | -0.0863933  | 0.54695  | 0.695407    | no  |
| Mbd4     | 2.98416  | 2.22722 | -0.422078   | 0.04415  | 0.0979227   | no  |
| Mbd5     | 1.32395  | 1.36749 | 0.0466767   | 0.8244   | 0.898984    | no  |
| Mbd6     | 22.4795  | 25.7772 | 0.197485    | 0.37275  | 0.531407    | no  |
| Mbip     | 15.1466  | 16.4787 | 0.121615    | 0.4773   | 0.633367    | no  |
| Mblac2   | 2.03032  | 2.10621 | 0.0529402   | 0.8052   | 0.887012    | no  |
| Mbnl1    | 260.335  | 283.078 | 0.120827    | 0.42735  | 0.585705    | no  |
| Mbnl2    | 9.15942  | 7.46391 | -0.295326   | 0.05805  | 0.123397    | no  |
| Mbnl3    | 4.54054  | 3.59717 | -0.336001   | 0.03195  | 0.0744133   | no  |
| Mboat1   | 6.18956  | 6.57073 | 0.0862164   | 0.61985  | 0.755787    | no  |
| Mboat4   | 1.221    | 1.54729 | 0.341684    | 0.2828   | 0.432769    | no  |
| Mboat7   | 10.933   | 11.7156 | 0.0997363   | 0.5294   | 0.680547    | no  |
| Mbp      | 55.0508  | 57.1889 | 0.0549716   | 0.7018   | 0.817009    | no  |
| Mbtd1    | 9.75248  | 11.8569 | 0.281891    | 0.06245  | 0.131065    | no  |
| Mbtps1   | 29.9313  | 33.4738 | 0.161378    | 0.24885  | 0.394243    | no  |
| Mbtps2   | 4.43946  | 4.70597 | 0.084108    | 0.6773   | 0.799725    | no  |
| Mcam     | 1.20524  | 0.57791 | -1.06041    | 0.0031   | 0.00983478  | yes |
| Mcat     | 9.78287  | 9.74613 | -0.00542758 | 0.9728   | 0.985025    | no  |
| Mccc1    | 5.01804  | 5.91928 | 0.238296    | 0.1925   | 0.326196    | no  |
| Mccc2    | 1.27381  | 1.90811 | 0.582999    | 0.045    | 0.0995421   | no  |
| Mcee     | 12.945   | 11.8934 | -0.122235   | 0.5935   | 0.734507    | no  |
| Mcf2     | 13.3092  | 14.8043 | 0.153597    | 0.3503   | 0.507677    | no  |
| Mcl1     | 151.914  | 147.331 | -0.0441905  | 0.75765  | 0.855527    | no  |
| Mcm10    | 5.71382  | 3.06695 | -0.897654   | 5.00E-05 | 0.000236281 | yes |
| Mcm2     | 30.5654  | 23.0281 | -0.408507   | 0.0055   | 0.0162672   | yes |
| Mcm3     | 44.4445  | 33.4536 | -0.409842   | 0.00405  | 0.012441    | yes |
| Mcm3ap   | 19.4847  | 18.8334 | -0.0490435  | 0.7343   | 0.839734    | no  |
| Mcm4     | 45.9416  | 37.3434 | -0.298949   | 0.03505  | 0.0804834   | no  |

|        |         |         |              |          |             |     |
|--------|---------|---------|--------------|----------|-------------|-----|
| Mcm5   | 46.369  | 30.3722 | -0.610407    | 5.00E-05 | 0.000236281 | yes |
| Mcm6   | 92.4198 | 69.3995 | -0.413277    | 0.0033   | 0.0103917   | yes |
| Mcm7   | 51.8399 | 36.7401 | -0.496707    | 0.00045  | 0.0017621   | yes |
| Mcm8   | 1.80164 | 1.39291 | -0.371208    | 0.12385  | 0.229896    | no  |
| Mcm9   | 4.59476 | 4.87661 | 0.0858891    | 0.70255  | 0.817599    | no  |
| Mcmbp  | 27.4661 | 27.2736 | -0.0101515   | 0.94315  | 0.969199    | no  |
| Mcoln1 | 14.8271 | 13.9847 | -0.0843865   | 0.609    | 0.746776    | no  |
| Mcoln2 | 7.09052 | 13.2062 | 0.897249     | 5.00E-05 | 0.000236281 | yes |
| Mcph1  | 4.02946 | 3.95663 | -0.026314    | 0.8811   | 0.933374    | no  |
| Mcrs1  | 41.7211 | 37.8798 | -0.13935     | 0.3445   | 0.501371    | no  |
| Mctp2  | 17.2835 | 15.2937 | -0.176456    | 0.22425  | 0.366593    | no  |
| Mcts1  | 62.7366 | 56.7683 | -0.14422     | 0.3437   | 0.500516    | no  |
| Mcts2  | 7.25408 | 8.27702 | 0.190321     | 0.85065  | 0.914834    | no  |
| Mcu    | 10.0315 | 10.0601 | 0.00411354   | 0.98185  | 0.989603    | no  |
| Mcur1  | 9.66969 | 10.8945 | 0.17206      | 0.2631   | 0.409566    | no  |
| Mdc1   | 12.5483 | 13.2241 | 0.0756722    | 0.5983   | 0.738389    | no  |
| Mdfic  | 7.72793 | 6.86148 | -0.171562    | 0.30005  | 0.452379    | no  |
| Mdh1   | 96.3771 | 91.7873 | -0.0703955   | 0.6182   | 0.754531    | no  |
| Mdh2   | 205.849 | 195.824 | -0.072029    | 0.611    | 0.748487    | no  |
| Mdk    | 5.07329 | 4.34321 | -0.224162    | 0.521    | 0.673046    | no  |
| Mdm1   | 8.2262  | 4.93297 | -0.737769    | 5.00E-05 | 0.000236281 | yes |
| Mdm2   | 44.3455 | 42.7577 | -0.0526023   | 0.7139   | 0.825689    | no  |
| Mdm4   | 53.7319 | 55.2372 | 0.0398628    | 0.77635  | 0.868226    | no  |
| Mdn1   | 6.48914 | 9.4652  | 0.544606     | 0.00025  | 0.00103712  | yes |
| Mdp1   | 61.6013 | 60.7444 | -0.0202086   | 0.89     | 0.93838     | no  |
| Me2    | 77.0257 | 67.7817 | -0.184445    | 0.18915  | 0.321887    | no  |
| Mea1   | 67.2252 | 63.5086 | -0.0820516   | 0.77615  | 0.86814     | no  |
| Meaf6  | 23.9301 | 21.995  | -0.121652    | 0.47015  | 0.626742    | no  |
| Mecp2  | 7.60126 | 8.09795 | 0.0913168    | 0.535    | 0.685399    | no  |
| Mecr   | 8.88911 | 10.6194 | 0.256587     | 0.18425  | 0.315136    | no  |
| Med1   | 22.4237 | 22.0254 | -0.0258576   | 0.86915  | 0.92636     | no  |
| Med10  | 90.9725 | 86.1617 | -0.0783829   | 0.5937   | 0.734665    | no  |
| Med11  | 46.49   | 48.2162 | 0.0525979    | 0.73785  | 0.842374    | no  |
| Med12  | 39.2742 | 39.2607 | -0.000495921 | 0.99775  | 0.998245    | no  |
| Med12l | 3.17046 | 1.87755 | -0.755839    | 0.0274   | 0.065409    | no  |
| Med13  | 19.6065 | 19.3357 | -0.0200677   | 0.8864   | 0.936386    | no  |
| Med13l | 11.6545 | 12.9045 | 0.146987     | 0.3081   | 0.461362    | no  |
| Med14  | 15.6225 | 15.4775 | -0.0134538   | 0.92625  | 0.959764    | no  |
| Med15  | 38.798  | 36.0733 | -0.105052    | 0.45735  | 0.614788    | no  |
| Med16  | 13.6735 | 13.1848 | -0.0525031   | 0.7348   | 0.840115    | no  |
| Med17  | 15.0854 | 16.0726 | 0.0914566    | 0.5377   | 0.68766     | no  |
| Med18  | 2.17033 | 2.18931 | 0.0125626    | 0.9666   | 0.981874    | no  |
| Med19  | 8.15086 | 7.463   | -0.127196    | 0.7867   | 0.875183    | no  |
| Med20  | 18.7605 | 16.1129 | -0.219484    | 0.1676   | 0.292362    | no  |
| Med21  | 35.8083 | 33.4293 | -0.099178    | 0.5656   | 0.711151    | no  |
| Med22  | 14.392  | 15.721  | 0.127422     | 0.4243   | 0.582645    | no  |
| Med23  | 8.53678 | 8.60993 | 0.012309     | 0.9346   | 0.964438    | no  |
| Med24  | 21.9781 | 21.3693 | -0.0405286   | 0.7774   | 0.868973    | no  |
| Med25  | 26.5507 | 29.3538 | 0.144798     | 0.3299   | 0.485559    | no  |
| Med26  | 10.0352 | 9.753   | -0.0411482   | 0.7999   | 0.883614    | no  |
| Med27  | 21.0777 | 20.7715 | -0.0211099   | 0.9001   | 0.944711    | no  |
| Med28  | 15.5109 | 13.7143 | -0.1776      | 0.22885  | 0.372002    | no  |
| Med29  | 6.71096 | 7.0617  | 0.0734968    | 0.6805   | 0.802095    | no  |
| Med30  | 78.994  | 66.5763 | -0.246734    | 0.1027   | 0.197568    | no  |
| Med31  | 4.64814 | 3.85766 | -0.26893     | 0.299    | 0.451104    | no  |
| Med4   | 28.5446 | 25.0003 | -0.191273    | 0.23675  | 0.381348    | no  |
| Med6   | 20.8154 | 18.7701 | -0.149218    | 0.4045   | 0.563425    | no  |

|          |         |         |            |          |             |     |
|----------|---------|---------|------------|----------|-------------|-----|
| Med7     | 11.1724 | 9.8932  | -0.175436  | 0.2877   | 0.438272    | no  |
| Med8     | 33.6282 | 30.6702 | -0.132832  | 0.37925  | 0.538249    | no  |
| Med9     | 5.72968 | 5.84631 | 0.0290716  | 0.8757   | 0.930307    | no  |
| Mef2a    | 26.1585 | 23.1469 | -0.17646   | 0.2173   | 0.358151    | no  |
| Mef2d    | 50.0559 | 55.8793 | 0.158773   | 0.2652   | 0.412071    | no  |
| Megf9    | 2.36052 | 1.83653 | -0.36212   | 0.12225  | 0.227531    | no  |
| Meis3    | 20.9229 | 20.7766 | -0.0101278 | 0.95155  | 0.974058    | no  |
| Melk     | 5.50396 | 3.06766 | -0.843333  | 5.00E-05 | 0.000236281 | yes |
| Memo1    | 31.0915 | 28.5926 | -0.120878  | 0.4273   | 0.585659    | no  |
| Men1     | 23.1861 | 21.8289 | -0.0870224 | 0.5594   | 0.705971    | no  |
| Mepce    | 21.2189 | 21.5518 | 0.0224581  | 0.88055  | 0.933044    | no  |
| Mesdc1   | 7.90937 | 7.41572 | -0.0929763 | 0.5735   | 0.717722    | no  |
| Mesdc2   | 6.67007 | 7.85181 | 0.235324   | 0.1381   | 0.250474    | no  |
| Metap1   | 16.7553 | 17.6726 | 0.0768941  | 0.61315  | 0.75034     | no  |
| Metap1d  | 9.65347 | 11.5025 | 0.252823   | 0.1923   | 0.32592     | no  |
| Metap2   | 29.886  | 28.8083 | -0.0529835 | 0.71055  | 0.823433    | no  |
| Metrn    | 18.6382 | 14.2902 | -0.383232  | 0.0313   | 0.0731359   | no  |
| Mettl1   | 3.55474 | 5.56807 | 0.647433   | 0.0271   | 0.0647848   | no  |
| Mettl10  | 23.5807 | 22.2328 | -0.0849193 | 0.61815  | 0.754496    | no  |
| Mettl13  | 3.78442 | 4.55906 | 0.268665   | 0.16535  | 0.289202    | no  |
| Mettl14  | 12.928  | 12.976  | 0.00535584 | 0.9723   | 0.984802    | no  |
| Mettl15  | 3.01939 | 2.9345  | -0.041142  | 0.8683   | 0.925972    | no  |
| Mettl16  | 11.107  | 12.1999 | 0.135399   | 0.40075  | 0.559737    | no  |
| Mettl17  | 22.394  | 23.3523 | 0.0604539  | 0.70565  | 0.819909    | no  |
| Mettl18  | 4.59074 | 4.41423 | -0.0565657 | 0.81215  | 0.891385    | no  |
| Mettl2   | 11.1529 | 12.0619 | 0.113035   | 0.4837   | 0.639216    | no  |
| Mettl20  | 5.21638 | 6.497   | 0.316724   | 0.13745  | 0.249659    | no  |
| Mettl21a | 7.35616 | 7.15277 | -0.0404501 | 0.8168   | 0.894236    | no  |
| Mettl22  | 5.50312 | 6.71125 | 0.286331   | 0.19895  | 0.33485     | no  |
| Mettl23  | 129.3   | 114.482 | -0.17559   | 0.2166   | 0.357281    | no  |
| Mettl25  | 3.94251 | 3.71369 | -0.0862597 | 0.69365  | 0.811604    | no  |
| Mettl3   | 27.8064 | 25.1441 | -0.145197  | 0.59095  | 0.73234     | no  |
| Mettl4   | 8.87536 | 8.48894 | -0.0642209 | 0.7226   | 0.831649    | no  |
| Mettl5   | 18.2343 | 17.8022 | -0.0345944 | 0.9537   | 0.975156    | no  |
| Mettl6   | 13.2451 | 12.4683 | -0.0872021 | 0.6059   | 0.74441     | no  |
| Mettl7a1 | 17.3054 | 19.5066 | 0.17274    | 0.2812   | 0.431012    | no  |
| Mettl8   | 8.73152 | 10.6041 | 0.280316   | 0.1031   | 0.198186    | no  |
| Mettl9   | 20.4492 | 24.4076 | 0.255287   | 0.10375  | 0.199202    | no  |
| Mex3b    | 5.56544 | 4.89343 | -0.185649  | 0.2925   | 0.443678    | no  |
| Mex3c    | 10.8484 | 10.4828 | -0.0494629 | 0.75305  | 0.852379    | no  |
| Mex3d    | 2.29037 | 2.36693 | 0.0474377  | 0.8306   | 0.902777    | no  |
| Mfap1a   | 15.8442 | 14.902  | -0.0884517 | 0.55275  | 0.700334    | no  |
| Mfap1b   | 4.9217  | 4.95612 | 0.0100542  | 0.9596   | 0.978255    | no  |
| Mfap3    | 9.4446  | 8.98869 | -0.0713788 | 0.63885  | 0.770726    | no  |
| Mff      | 45.6565 | 41.3051 | -0.144497  | 0.3194   | 0.47397     | no  |
| Mfge8    | 12.229  | 11.4508 | -0.0948591 | 0.5707   | 0.715295    | no  |
| Mfhas1   | 4.61804 | 4.11289 | -0.167126  | 0.30775  | 0.461005    | no  |
| Mfn1     | 6.86957 | 6.65643 | -0.0454708 | 0.7773   | 0.868875    | no  |
| Mfn2     | 16.6886 | 17.3231 | 0.0538317  | 0.7091   | 0.822415    | no  |
| Mfng     | 75.5397 | 89.8398 | 0.250119   | 0.076    | 0.153866    | no  |
| Mfsd1    | 41.6556 | 40.5623 | -0.0383725 | 0.7912   | 0.878168    | no  |
| Mfsd10   | 19.0964 | 19.8686 | 0.0571875  | 0.71745  | 0.82795     | no  |
| Mfsd11   | 9.72108 | 9.50194 | -0.0328946 | 0.8375   | 0.906924    | no  |
| Mfsd12   | 1.34127 | 2.09546 | 0.643666   | 0.0487   | 0.10635     | no  |
| Mfsd2a   | 0.69719 | 1.43827 | 1.04471    | 0.00385  | 0.0118893   | yes |
| Mfsd3    | 1.70262 | 1.82158 | 0.0974293  | 0.766    | 0.861167    | no  |
| Mfsd4    | 5.75197 | 6.22447 | 0.113896   | 0.5258   | 0.677276    | no  |

|          |         |         |             |          |             |     |
|----------|---------|---------|-------------|----------|-------------|-----|
| Mfsd5    | 24.7477 | 24.7556 | 0.000459171 | 0.99735  | 0.998       | no  |
| Mfsd6    | 7.54808 | 7.71823 | 0.0321602   | 0.83995  | 0.908323    | no  |
| Mfsd7b   | 5.55663 | 5.68467 | 0.0328661   | 0.85505  | 0.917912    | no  |
| Mfsd8    | 8.37264 | 7.93883 | -0.0767576  | 0.64435  | 0.774937    | no  |
| Mga      | 8.32918 | 9.7454  | 0.226547    | 0.1083   | 0.206383    | no  |
| Mgat1    | 41.1411 | 40.2311 | -0.0322684  | 0.8174   | 0.894657    | no  |
| Mgat2    | 45.0245 | 47.5808 | 0.0796677   | 0.5784   | 0.721806    | no  |
| Mgat4a   | 5.11178 | 4.90369 | -0.0599591  | 0.7003   | 0.816057    | no  |
| Mgat4b   | 3.07188 | 4.02893 | 0.391274    | 0.0664   | 0.137579    | no  |
| Mgat5    | 2.80193 | 3.4094  | 0.283098    | 0.16505  | 0.28877     | no  |
| Mgea5    | 100.526 | 104.653 | 0.0580368   | 0.6923   | 0.810683    | no  |
| Mgme1    | 3.50371 | 4.00576 | 0.193191    | 0.33385  | 0.48979     | no  |
| Mgrn1    | 5.24698 | 7.0708  | 0.430388    | 0.1664   | 0.290707    | no  |
| Mgst2    | 68.0504 | 64.453  | -0.0783552  | 0.6401   | 0.771535    | no  |
| Mgst3    | 4.67721 | 4.15325 | -0.17141    | 0.6167   | 0.753339    | no  |
| Mib1     | 5.92652 | 7.1799  | 0.27678     | 0.098    | 0.190196    | no  |
| Mib2     | 13.5345 | 13.5576 | 0.00246499  | 0.9856   | 0.99167     | no  |
| Mical1   | 105.784 | 94.2138 | -0.16711    | 0.2449   | 0.390017    | no  |
| Mical2   | 2.01474 | 1.39289 | -0.532516   | 0.00805  | 0.0226766   | yes |
| Micall1  | 8.30975 | 9.11759 | 0.133847    | 0.38205  | 0.541114    | no  |
| Micu1    | 14.1195 | 13.3158 | -0.0845577  | 0.59715  | 0.737447    | no  |
| Micu2    | 55.097  | 53.2949 | -0.0479762  | 0.73635  | 0.841301    | no  |
| Micu3    | 1.91797 | 2.34274 | 0.288619    | 0.2011   | 0.337447    | no  |
| Mid1ip1  | 22.1893 | 18.7085 | -0.246172   | 0.1075   | 0.205141    | no  |
| Midn     | 27.6604 | 30.9805 | 0.163539    | 0.2528   | 0.397114    | no  |
| Mief1    | 8.68418 | 8.77842 | 0.015572    | 0.91755  | 0.954805    | no  |
| Mief2    | 10.8259 | 10.0366 | -0.109216   | 0.51205  | 0.665173    | no  |
| Mien1    | 133.604 | 133.327 | -0.00299869 | 0.984    | 0.990695    | no  |
| Mier1    | 38.9352 | 37.8436 | -0.0410232  | 0.7723   | 0.865479    | no  |
| Mier2    | 6.30713 | 6.17732 | -0.0300014  | 0.8737   | 0.929049    | no  |
| Mier3    | 4.44693 | 3.93531 | -0.176332   | 0.30145  | 0.453957    | no  |
| Mif      | 191.572 | 246.922 | 0.366165    | 0.012    | 0.0320694   | yes |
| Mif4gd   | 45.8542 | 51.6093 | 0.170579    | 0.2558   | 0.400712    | no  |
| Miip     | 39.3487 | 35.98   | -0.129121   | 0.38765  | 0.546839    | no  |
| Milr1    | 4.52197 | 5.20411 | 0.202701    | 0.51015  | 0.663486    | no  |
| Mina     | 60.7586 | 57.3709 | -0.0827691  | 0.65295  | 0.781737    | no  |
| Mink1    | 38.7729 | 38.281  | -0.0184206  | 0.90045  | 0.944896    | no  |
| Minos1   | 30.2897 | 28.8782 | -0.0688433  | 0.6422   | 0.773313    | no  |
| Minpp1   | 18.3253 | 18.3528 | 0.00216253  | 0.9881   | 0.993038    | no  |
| Mios     | 9.5874  | 9.36033 | -0.0345805  | 0.82545  | 0.899714    | no  |
| Mipep    | 5.15644 | 5.54969 | 0.106032    | 0.57835  | 0.721769    | no  |
| Mipol1   | 1.02248 | 1.1976  | 0.22807     | 0.83725  | 0.906751    | no  |
| Mis12    | 13.2951 | 11.6789 | -0.186987   | 0.43095  | 0.58922     | no  |
| Mis18a   | 32.3979 | 28.3312 | -0.193509   | 0.2193   | 0.360396    | no  |
| Mis18bp1 | 6.22256 | 3.80178 | -0.710832   | 0.00015  | 0.000653255 | yes |
| Mitd1    | 27.956  | 30.1262 | 0.107858    | 0.50485  | 0.6589      | no  |
| Mki67    | 63.2054 | 38.2537 | -0.724447   | 5.00E-05 | 0.000236281 | yes |
| Mkks     | 8.04815 | 7.2419  | -0.152289   | 0.43075  | 0.589004    | no  |
| Mkl1     | 53.3364 | 51.4626 | -0.0515962  | 0.72225  | 0.831409    | no  |
| Mkl2     | 3.67974 | 4.21484 | 0.195874    | 0.2425   | 0.387295    | no  |
| Mkln1    | 19.0546 | 18.4067 | -0.049906   | 0.73185  | 0.838059    | no  |
| Mknk1    | 30.5493 | 28.9436 | -0.0778938  | 0.58885  | 0.730661    | no  |
| Mknk2    | 231.98  | 228.101 | -0.0243315  | 0.8691   | 0.926349    | no  |
| Mkrn1    | 58.7711 | 57.2638 | -0.0374826  | 0.78885  | 0.876842    | no  |
| Mkrn2    | 18.0539 | 16.8495 | -0.0996055  | 0.7907   | 0.877931    | no  |
| Mks1     | 6.36067 | 7.80327 | 0.2949      | 0.1054   | 0.20175     | no  |
| Mlec     | 36.2204 | 38.3069 | 0.0808007   | 0.5665   | 0.711763    | no  |

|           |         |          |             |         |           |     |
|-----------|---------|----------|-------------|---------|-----------|-----|
| Mlf1      | 1.26479 | 0.788866 | -0.681047   | 0.12895 | 0.237483  | no  |
| Mlf2      | 87.1709 | 80.5666  | -0.113664   | 0.42815 | 0.586437  | no  |
| Mlh1      | 10.6364 | 11.1044  | 0.0621193   | 0.70675 | 0.820782  | no  |
| Mlh3      | 2.0238  | 2.12948  | 0.0734343   | 0.70505 | 0.819563  | no  |
| Mlkl      | 3.30013 | 3.43519  | 0.057869    | 0.8118  | 0.891125  | no  |
| Mllt1     | 34.3603 | 34.6435  | 0.0118449   | 0.93555 | 0.964971  | no  |
| Mllt10    | 19.6159 | 19.2873  | -0.0243697  | 0.91345 | 0.952575  | no  |
| Mllt11    | 6.20947 | 6.73113  | 0.11638     | 0.92575 | 0.95949   | no  |
| Mllt3     | 15.8131 | 15.6418  | -0.0157181  | 0.9129  | 0.952325  | no  |
| Mllt4     | 1.06038 | 1.41072  | 0.411856    | 0.0475  | 0.104139  | no  |
| Mllt6     | 49.5372 | 53.4167  | 0.108778    | 0.44715 | 0.604612  | no  |
| Mlst8     | 11.933  | 12.0619  | 0.0155018   | 0.92115 | 0.957136  | no  |
| Mlx       | 43.3555 | 42.4176  | -0.0315523  | 0.83255 | 0.903961  | no  |
| Mlxip     | 15.8385 | 18.0529  | 0.1888      | 0.19075 | 0.323899  | no  |
| Mlycd     | 11.006  | 12.0203  | 0.127181    | 0.4505  | 0.607965  | no  |
| Mmaa      | 2.47626 | 2.75014  | 0.151339    | 0.50135 | 0.655472  | no  |
| Mmab      | 2.48087 | 3.00478  | 0.276412    | 0.1933  | 0.327229  | no  |
| Mmachc    | 1.96397 | 2.42599  | 0.304802    | 0.24975 | 0.395297  | no  |
| Mmadhc    | 42.6842 | 40.9392  | -0.0602171  | 0.69145 | 0.810091  | no  |
| Mmd       | 14.2575 | 16.2476  | 0.188504    | 0.21905 | 0.360102  | no  |
| Mmgt1     | 7.83747 | 6.32617  | -0.309056   | 0.05395 | 0.115957  | no  |
| Mmgt2     | 15.1306 | 11.5077  | -0.394866   | 0.0206  | 0.0511824 | no  |
| Mms19     | 27.7841 | 25.1496  | -0.143723   | 0.36365 | 0.521902  | no  |
| Mms22l    | 7.80135 | 6.00127  | -0.378456   | 0.0172  | 0.0436852 | yes |
| Mnat1     | 6.099   | 5.91227  | -0.0448613  | 0.8069  | 0.888011  | no  |
| Mndal     | 191.022 | 172.69   | -0.145557   | 0.30505 | 0.457844  | no  |
| Mns1      | 18.0028 | 15.1949  | -0.244642   | 0.2243  | 0.366649  | no  |
| Mnt       | 11.676  | 11.6072  | -0.0085245  | 0.95345 | 0.975084  | no  |
| Moap1     | 0.79827 | 1.02086  | 0.354833    | 0.68355 | 0.804239  | no  |
| Mob1a     | 106.29  | 98.5999  | -0.108346   | 0.44125 | 0.599148  | no  |
| Mob1b     | 6.53044 | 6.74953  | 0.0476059   | 0.77935 | 0.870257  | no  |
| Mob2      | 40.6763 | 44.5678  | 0.131812    | 0.3875  | 0.546672  | no  |
| Mob3a     | 99.9008 | 100.891  | 0.0142302   | 0.91945 | 0.956049  | no  |
| Mob3c     | 9.09086 | 10.2143  | 0.168098    | 0.3119  | 0.465551  | no  |
| Mob4      | 18.6587 | 17.5912  | -0.0849905  | 0.5712  | 0.715719  | no  |
| Mocos     | 3.29796 | 3.57436  | 0.116109    | 0.56295 | 0.708817  | no  |
| Mocs1     | 8.70852 | 8.67342  | -0.00582661 | 0.97145 | 0.98428   | no  |
| Mocs2     | 18.177  | 17.5814  | -0.0480682  | 0.7661  | 0.861239  | no  |
| Mocs3     | 7.15613 | 6.55829  | -0.12586    | 0.5181  | 0.670564  | no  |
| Mogs      | 24.8872 | 30.0797  | 0.27339     | 0.0601  | 0.127104  | no  |
| Mon1a     | 17.306  | 17.0456  | -0.0218753  | 0.8948  | 0.941332  | no  |
| Mon1b     | 15.7025 | 14.0596  | -0.159435   | 0.27425 | 0.422884  | no  |
| Mon2      | 14.6427 | 14.5316  | -0.0109815  | 0.93495 | 0.964634  | no  |
| Morc2a    | 11.3097 | 14.0468  | 0.312681    | 0.03455 | 0.0794645 | no  |
| Morc3     | 36.421  | 33.7687  | -0.109083   | 0.44405 | 0.601827  | no  |
| Morf4l1   | 144.439 | 131.393  | -0.136573   | 0.33815 | 0.494475  | no  |
| Morf4l2   | 34.0631 | 30.3972  | -0.164274   | 0.2863  | 0.436752  | no  |
| Morn2     | 0.94304 | 1.30303  | 0.466481    | 0.7503  | 0.85078   | no  |
| Mospd1    | 10.2589 | 7.32494  | -0.485985   | 0.0061  | 0.0177994 | yes |
| Mospd2    | 4.60572 | 4.274    | -0.107841   | 0.5616  | 0.707698  | no  |
| Mospd3    | 57.1618 | 53.9102  | -0.0844954  | 0.56745 | 0.712487  | no  |
| Mov10     | 8.24533 | 9.33359  | 0.178855    | 0.2703  | 0.418201  | no  |
| Mpc1      | 54.7188 | 50.5229  | -0.115098   | 0.639   | 0.770756  | no  |
| Mpc2      | 40.9298 | 41.0913  | 0.00568074  | 0.97245 | 0.98484   | no  |
| Mpdu1     | 53.8752 | 53.9046  | 0.000786542 | 0.9936  | 0.995999  | no  |
| Mpg       | 9.92428 | 8.99302  | -0.142156   | 0.5837  | 0.726417  | no  |
| Mphosph10 | 15.1708 | 16.7074  | 0.139195    | 0.37695 | 0.535826  | no  |

|          |         |         |             |         |           |    |
|----------|---------|---------|-------------|---------|-----------|----|
| Mphosph6 | 20.2004 | 19.4553 | -0.0542192  | 0.7554  | 0.854011  | no |
| Mphosph8 | 15.4005 | 15.161  | -0.0226063  | 0.89355 | 0.940507  | no |
| Mphosph9 | 5.912   | 5.6202  | -0.0730259  | 0.62995 | 0.763617  | no |
| Mpi      | 5.76233 | 5.18702 | -0.151747   | 0.46375 | 0.620802  | no |
| Mplkip   | 11.6199 | 12.5302 | 0.108812    | 0.5033  | 0.657436  | no |
| Mpnd     | 56.3622 | 47.2952 | -0.253032   | 0.31735 | 0.471512  | no |
| Mpp1     | 11.9702 | 11.1767 | -0.0989591  | 0.7119  | 0.824281  | no |
| Mpp6     | 11.3103 | 10.4347 | -0.116249   | 0.48785 | 0.642918  | no |
| Mpp7     | 1.40565 | 1.47385 | 0.068354    | 0.78895 | 0.876884  | no |
| Mppe1    | 48.034  | 51.9761 | 0.113793    | 0.6073  | 0.745534  | no |
| Mprip    | 11.342  | 13.2517 | 0.224506    | 0.11285 | 0.213292  | no |
| Mpst     | 26.3032 | 23.4793 | -0.163849   | 0.3099  | 0.463389  | no |
| Mpv17    | 14.8532 | 14.2319 | -0.0616402  | 0.94545 | 0.970455  | no |
| Mpv17l   | 8.04734 | 9.37142 | 0.219756    | 0.1771  | 0.305319  | no |
| Mpv17l2  | 28.7838 | 25.7476 | -0.16082    | 0.35785 | 0.51577   | no |
| Mpzl3    | 4.79874 | 5.3928  | 0.168379    | 0.52105 | 0.673098  | no |
| Mr1      | 7.13319 | 6.5457  | -0.123998   | 0.49175 | 0.646465  | no |
| Mre11a   | 10.2743 | 10.0525 | -0.0314781  | 0.8403  | 0.908618  | no |
| Mrfap1   | 78.316  | 88.9485 | 0.183663    | 0.19645 | 0.331465  | no |
| Mrgbp    | 18.1416 | 17.6143 | -0.0425561  | 0.8101  | 0.890159  | no |
| Mri1     | 17.6833 | 20.1789 | 0.190458    | 0.2166  | 0.357281  | no |
| Mrm1     | 6.74652 | 5.92208 | -0.188039   | 0.2969  | 0.448713  | no |
| Mroh1    | 11.9722 | 13.3927 | 0.161757    | 0.44235 | 0.600226  | no |
| Mrpl1    | 8.13294 | 7.87924 | -0.0457192  | 0.81385 | 0.892266  | no |
| Mrpl10   | 47.8336 | 44.5426 | -0.102838   | 0.48045 | 0.63616   | no |
| Mrpl11   | 7.8556  | 7.88169 | 0.00478313  | 0.9776  | 0.987534  | no |
| Mrpl12   | 60.3641 | 58.6141 | -0.0424434  | 0.78165 | 0.871722  | no |
| Mrpl13   | 55.4092 | 50.6566 | -0.129376   | 0.4136  | 0.572462  | no |
| Mrpl14   | 43.506  | 37.528  | -0.213246   | 0.23375 | 0.377757  | no |
| Mrpl15   | 16.3793 | 14.9689 | -0.129903   | 0.4411  | 0.599013  | no |
| Mrpl16   | 29.8529 | 26.8151 | -0.154824   | 0.3431  | 0.49988   | no |
| Mrpl17   | 3.09319 | 3.65082 | 0.239127    | 0.16155 | 0.283835  | no |
| Mrpl18   | 94.1947 | 86.4772 | -0.123326   | 0.3993  | 0.558319  | no |
| Mrpl19   | 8.2566  | 8.28111 | 0.00427629  | 0.9794  | 0.988433  | no |
| Mrpl2    | 26.6556 | 27.8226 | 0.0618169   | 0.7055  | 0.819802  | no |
| Mrpl20   | 73.6902 | 70.5701 | -0.0624148  | 0.69695 | 0.813914  | no |
| Mrpl21   | 31.9347 | 32.6489 | 0.0319094   | 0.8456  | 0.911779  | no |
| Mrpl22   | 26.3576 | 28.399  | 0.107622    | 0.55955 | 0.706072  | no |
| Mrpl23   | 42.9404 | 47.0436 | 0.131663    | 0.45935 | 0.616666  | no |
| Mrpl24   | 91.5317 | 98.977  | 0.112822    | 0.5252  | 0.6768    | no |
| Mrpl27   | 56.9418 | 49.5293 | -0.201207   | 0.216   | 0.356516  | no |
| Mrpl28   | 31.6982 | 29.6064 | -0.0984944  | 0.5515  | 0.699365  | no |
| Mrpl3    | 30.6961 | 29.9426 | -0.0358527  | 0.8118  | 0.891125  | no |
| Mrpl30   | 110.097 | 88.9736 | -0.307323   | 0.0421  | 0.0940408 | no |
| Mrpl32   | 59.6626 | 55.4974 | -0.104407   | 0.51445 | 0.667284  | no |
| Mrpl33   | 307.14  | 284.552 | -0.110203   | 0.44875 | 0.606137  | no |
| Mrpl34   | 60.6888 | 60.6225 | -0.00157638 | 0.99275 | 0.995486  | no |
| Mrpl35   | 6.74735 | 6.73879 | -0.00183076 | 0.9871  | 0.992486  | no |
| Mrpl36   | 51.9162 | 53.7955 | 0.051301    | 0.7408  | 0.844294  | no |
| Mrpl37   | 29.5232 | 28.6071 | -0.0454766  | 0.76535 | 0.860738  | no |
| Mrpl38   | 18.3781 | 19.0147 | 0.0491255   | 0.77165 | 0.86508   | no |
| Mrpl39   | 20.4971 | 22.2363 | 0.117499    | 0.45655 | 0.614099  | no |
| Mrpl4    | 70.2907 | 63.6794 | -0.142505   | 0.3237  | 0.47878   | no |
| Mrpl40   | 46.9697 | 44.4803 | -0.0785645  | 0.60785 | 0.745881  | no |
| Mrpl41   | 11.2387 | 10.2629 | -0.131041   | 0.51815 | 0.670579  | no |
| Mrpl42   | 80.2269 | 70.4916 | -0.186635   | 0.22795 | 0.370975  | no |
| Mrpl43   | 49.4509 | 47.9235 | -0.0452646  | 0.76835 | 0.862724  | no |



|         |         |         |              |          |             |     |
|---------|---------|---------|--------------|----------|-------------|-----|
| Mrpl44  | 20.8745 | 20.7085 | -0.0115169   | 0.94485  | 0.970126    | no  |
| Mrpl45  | 11.6371 | 11.6314 | -0.000700673 | 0.9955   | 0.997005    | no  |
| Mrpl46  | 27.1989 | 26.8556 | -0.0183255   | 0.9134   | 0.952565    | no  |
| Mrpl47  | 11.6944 | 12.05   | 0.043222     | 0.8367   | 0.906434    | no  |
| Mrpl48  | 37.0636 | 35.28   | -0.0711524   | 0.81775  | 0.894804    | no  |
| Mrpl49  | 24.8861 | 24.0802 | -0.0474922   | 0.841    | 0.909041    | no  |
| Mrpl50  | 11.5815 | 10.5735 | -0.131372    | 0.43195  | 0.59013     | no  |
| Mrpl51  | 26.7506 | 28.3537 | 0.0839649    | 0.58925  | 0.730965    | no  |
| Mrpl52  | 164.385 | 183.884 | 0.161716     | 0.3021   | 0.454664    | no  |
| Mrpl53  | 32.032  | 29.3624 | -0.125545    | 0.64025  | 0.771584    | no  |
| Mrpl54  | 74.3098 | 63.486  | -0.227113    | 0.1691   | 0.294222    | no  |
| Mrpl55  | 16.5694 | 16.729  | 0.0138317    | 0.9443   | 0.969787    | no  |
| Mrpl9   | 88.7523 | 87.4082 | -0.0220154   | 0.87725  | 0.931183    | no  |
| Mrps10  | 13.1152 | 13.4826 | 0.0398504    | 0.8372   | 0.906751    | no  |
| Mrps11  | 19.6301 | 19.9227 | 0.0213444    | 0.9035   | 0.946731    | no  |
| Mrps12  | 40.4582 | 44.3031 | 0.130977     | 0.4396   | 0.597586    | no  |
| Mrps14  | 21.0877 | 21.6231 | 0.0361717    | 0.8172   | 0.894549    | no  |
| Mrps15  | 51.7574 | 51.9566 | 0.00554297   | 0.97045  | 0.983916    | no  |
| Mrps16  | 245.514 | 226.329 | -0.117382    | 0.4118   | 0.570698    | no  |
| Mrps17  | 31.855  | 33.3501 | 0.0661703    | 0.67385  | 0.797138    | no  |
| Mrps18a | 32.3961 | 31.5728 | -0.037138    | 0.83005  | 0.902457    | no  |
| Mrps18b | 21.7211 | 25.5882 | 0.236383     | 0.16515  | 0.288923    | no  |
| Mrps18c | 105.085 | 96.2086 | -0.127315    | 0.4279   | 0.586231    | no  |
| Mrps2   | 13.1403 | 13.7827 | 0.0688539    | 0.67235  | 0.796011    | no  |
| Mrps21  | 181.227 | 170.678 | -0.0865134   | 0.5846   | 0.727126    | no  |
| Mrps22  | 9.99138 | 8.68602 | -0.201987    | 0.3174   | 0.471567    | no  |
| Mrps23  | 68.2829 | 61.5548 | -0.149654    | 0.3241   | 0.479191    | no  |
| Mrps24  | 50.7033 | 55.3656 | 0.12691      | 0.41375  | 0.572591    | no  |
| Mrps25  | 17.0008 | 15.2934 | -0.152693    | 0.40965  | 0.568634    | no  |
| Mrps26  | 66.2207 | 68.6621 | 0.0522324    | 0.72985  | 0.836447    | no  |
| Mrps27  | 6.81211 | 7.71984 | 0.180469     | 0.3543   | 0.511887    | no  |
| Mrps28  | 13.6146 | 17.68   | 0.376958     | 0.07855  | 0.158126    | no  |
| Mrps30  | 27.2531 | 25.4817 | -0.0969583   | 0.53565  | 0.685983    | no  |
| Mrps31  | 11.3786 | 10.0269 | -0.182442    | 0.3199   | 0.474542    | no  |
| Mrps33  | 42.2124 | 42.9256 | 0.0241724    | 0.88025  | 0.932877    | no  |
| Mrps34  | 34.7786 | 36.9836 | 0.0886861    | 0.5969   | 0.737254    | no  |
| Mrps35  | 36.0472 | 37.3337 | 0.050592     | 0.7536   | 0.852755    | no  |
| Mrps36  | 53.7864 | 48.8005 | -0.140344    | 0.38815  | 0.547348    | no  |
| Mrps5   | 25.4835 | 32.2855 | 0.341323     | 0.0313   | 0.0731359   | no  |
| Mrps6   | 26.6811 | 35.0151 | 0.392163     | 0.0413   | 0.0924997   | no  |
| Mrps7   | 33.1712 | 33.7375 | 0.0244223    | 0.87245  | 0.928391    | no  |
| Mrps9   | 35.6858 | 33.59   | -0.0873182   | 0.57065  | 0.715258    | no  |
| Mrrf    | 6.00823 | 6.23515 | 0.0534832    | 0.8653   | 0.924071    | no  |
| Mrs2    | 16.385  | 16.7348 | 0.0304765    | 0.84915  | 0.913955    | no  |
| Mrto4   | 18.3954 | 19.0212 | 0.0482587    | 0.7785   | 0.869611    | no  |
| Ms4a4b  | 1787.89 | 1645.28 | -0.119919    | 0.45525  | 0.612934    | no  |
| Ms4a4c  | 9.5711  | 10.8778 | 0.184628     | 0.3081   | 0.461362    | no  |
| Ms4a4d  | 2.11306 | 2.10317 | -0.00677029  | 0.97935  | 0.988425    | no  |
| Ms4a6b  | 492.203 | 512.927 | 0.0594987    | 0.6818   | 0.802997    | no  |
| Ms4a6c  | 16.0591 | 14.0878 | -0.188943    | 0.3851   | 0.544091    | no  |
| Ms4a6d  | 10.0592 | 8.49165 | -0.244392    | 0.21115  | 0.350577    | no  |
| Msantd2 | 9.15408 | 9.21997 | 0.0103476    | 0.9546   | 0.975709    | no  |
| Msantd4 | 7.73552 | 7.11045 | -0.121558    | 0.4813   | 0.63695     | no  |
| Msc     | 8.7115  | 3.2711  | -1.41314     | 5.00E-05 | 0.000236281 | yes |
| Msh2    | 28.0024 | 28.1002 | 0.00503013   | 0.973    | 0.985143    | no  |
| Msh3    | 11.1709 | 10.5059 | -0.0885383   | 0.63335  | 0.766435    | no  |
| Msh6    | 10.7326 | 9.42799 | -0.186971    | 0.4734   | 0.629814    | no  |

|         |          |          |              |          |            |     |
|---------|----------|----------|--------------|----------|------------|-----|
| Msi2    | 9.52803  | 11.1055  | 0.221022     | 0.13145  | 0.241206   | no  |
| Msl1    | 32.133   | 31.9083  | -0.0101268   | 0.9595   | 0.978196   | no  |
| Msl2    | 39.9472  | 40.4824  | 0.0191997    | 0.892    | 0.939573   | no  |
| Msl3    | 15.9999  | 14.4421  | -0.147783    | 0.33255  | 0.488258   | no  |
| MsmP    | 13.4085  | 15.7046  | 0.228046     | 0.7623   | 0.85869    | no  |
| Msn     | 431.531  | 414.659  | -0.0575378   | 0.7182   | 0.828558   | no  |
| Msra    | 10.2545  | 10.2886  | 0.00479303   | 0.9782   | 0.987801   | no  |
| MsrB1   | 51.942   | 44.5962  | -0.21998     | 0.16425  | 0.28767    | no  |
| MsrB2   | 3.68732  | 3.94491  | 0.0974208    | 0.71665  | 0.827514   | no  |
| Mss51   | 2.24737  | 2.34355  | 0.0604559    | 0.82045  | 0.896521   | no  |
| Mst01   | 17.6978  | 17.961   | 0.0212944    | 0.9443   | 0.969787   | no  |
| Mt1     | 36.0256  | 34.6265  | -0.0571451   | 0.7649   | 0.860534   | no  |
| Mt2     | 14.5005  | 13.0193  | -0.155455    | 0.5384   | 0.688131   | no  |
| Mt3     | 9.93827  | 6.61089  | -0.58815     | 0.0516   | 0.111667   | no  |
| Mta1    | 44.5103  | 44.575   | 0.00209724   | 0.988    | 0.992966   | no  |
| Mta2    | 144.246  | 147.196  | 0.0292007    | 0.8385   | 0.907423   | no  |
| Mta3    | 76.6464  | 80.661   | 0.0736547    | 0.616    | 0.752796   | no  |
| Mtap    | 18.4399  | 17.7774  | -0.0527829   | 0.73125  | 0.837589   | no  |
| Mtap7d3 | 0.58187  | 1.11308  | 0.935782     | 0.00835  | 0.0234077  | yes |
| Mtbp    | 9.13159  | 8.19072  | -0.156875    | 0.3381   | 0.494422   | no  |
| Mtch1   | 62.4213  | 59.5841  | -0.0671123   | 0.6367   | 0.768973   | no  |
| Mtch2   | 32.0858  | 35.5602  | 0.148328     | 0.31295  | 0.466655   | no  |
| Mtcp1   | 10.272   | 10.1818  | -0.0127258   | 0.9524   | 0.974547   | no  |
| Mtdh    | 37.5522  | 46.5737  | 0.310619     | 0.03     | 0.0705373  | no  |
| Mterf1a | 4.35805  | 4.40217  | 0.0145306    | 0.95305  | 0.974859   | no  |
| Mterf1b | 2.38256  | 2.27325  | -0.0677544   | 0.8188   | 0.895453   | no  |
| Mterfd1 | 27.6919  | 28.1368  | 0.022997     | 0.93275  | 0.963294   | no  |
| Mterfd2 | 3.39471  | 3.40499  | 0.0043625    | 0.9771   | 0.987283   | no  |
| Mterfd3 | 7.87851  | 7.84058  | -0.00696198  | 0.9747   | 0.986157   | no  |
| Mtf1    | 5.56042  | 5.88643  | 0.0821995    | 0.6118   | 0.749116   | no  |
| Mtf2    | 12.3471  | 11.9294  | -0.0496546   | 0.74585  | 0.847777   | no  |
| Mtfmt   | 12.8043  | 13.2187  | 0.0459614    | 0.7798   | 0.870512   | no  |
| Mtfp1   | 0.981654 | 1.04301  | 0.0874615    | 0.8278   | 0.901065   | no  |
| Mtfr1   | 12.211   | 12.1519  | -0.00699819  | 0.96395  | 0.980433   | no  |
| Mtfr1l  | 33.4341  | 34.0426  | 0.0260236    | 0.8619   | 0.921932   | no  |
| Mtfr2   | 4.01669  | 2.21211  | -0.860583    | 5.00E-04 | 0.00193907 | yes |
| Mtg1    | 10.1314  | 10.4154  | 0.0398913    | 0.8243   | 0.898947   | no  |
| Mtg2    | 17.0144  | 17.9369  | 0.0761775    | 0.64765  | 0.777449   | no  |
| Mthfd1  | 9.44213  | 10.6457  | 0.173083     | 0.271    | 0.418962   | no  |
| Mthfd1l | 15.8016  | 14.6618  | -0.108013    | 0.47305  | 0.629514   | no  |
| Mthfd2  | 26.8534  | 28.2486  | 0.0730763    | 0.6333   | 0.766414   | no  |
| Mthfd2l | 1.20163  | 1.41967  | 0.240561     | 0.41435  | 0.573129   | no  |
| Mthfr   | 4.18928  | 3.95003  | -0.0848404   | 0.6141   | 0.751177   | no  |
| Mthfs   | 19.37    | 18.7938  | -0.0435685   | 0.8235   | 0.89838    | no  |
| Mthfsd  | 7.37169  | 7.28018  | -0.0180202   | 0.929    | 0.961217   | no  |
| Mtif2   | 19.4096  | 19.8565  | 0.0328421    | 0.8242   | 0.898921   | no  |
| Mtif3   | 8.08761  | 8.24842  | 0.0284044    | 0.89925  | 0.94424    | no  |
| Mtm1    | 1.01447  | 0.980368 | -0.0493256   | 0.86095  | 0.921489   | no  |
| Mtmr1   | 27.6188  | 30.9023  | 0.162064     | 0.25415  | 0.398747   | no  |
| Mtmr10  | 2.11038  | 1.95822  | -0.107964    | 0.58035  | 0.723536   | no  |
| Mtmr12  | 29.7883  | 26.8832  | -0.148044    | 0.29735  | 0.449239   | no  |
| Mtmr14  | 20.2801  | 18.3595  | -0.143531    | 0.34175  | 0.498325   | no  |
| Mtmr2   | 16.4802  | 15.9791  | -0.0445502   | 0.774    | 0.866696   | no  |
| Mtmr3   | 27.5379  | 27.5245  | -0.000698871 | 0.9967   | 0.997633   | no  |
| Mtmr4   | 9.23193  | 9.47449  | 0.0374167    | 0.8047   | 0.886863   | no  |
| Mtmr6   | 37.0535  | 34.7229  | -0.0937198   | 0.5113   | 0.664492   | no  |
| Mtmr7   | 1.82185  | 1.85302  | 0.0244768    | 0.97135  | 0.984263   | no  |

|         |         |          |            |          |             |     |
|---------|---------|----------|------------|----------|-------------|-----|
| Mtmr9   | 17.9376 | 15.5118  | -0.209622  | 0.1748   | 0.302062    | no  |
| Mto1    | 8.81266 | 8.57621  | -0.0392368 | 0.82115  | 0.896953    | no  |
| Mtor    | 7.22587 | 8.42793  | 0.222007   | 0.129    | 0.237557    | no  |
| Mtpap   | 19.1146 | 18.5327  | -0.0446001 | 0.77115  | 0.864712    | no  |
| Mtpn    | 101.729 | 88.7312  | -0.197219  | 0.166    | 0.290101    | no  |
| Mtr     | 8.30603 | 10.1429  | 0.288238   | 0.06415  | 0.133829    | no  |
| Mtrf1   | 3.21211 | 3.17237  | -0.0179585 | 0.93815  | 0.966566    | no  |
| Mtrf1l  | 7.15408 | 7.25858  | 0.0209217  | 0.90875  | 0.949752    | no  |
| Mtrr    | 6.17011 | 6.4126   | 0.0556139  | 0.73825  | 0.84264     | no  |
| Mturn   | 3.33112 | 3.11333  | -0.0975473 | 0.6018   | 0.741309    | no  |
| Mtx1    | 18.0451 | 17.811   | -0.0188401 | 0.9089   | 0.949752    | no  |
| Mtx2    | 14.3027 | 13.6803  | -0.0641828 | 0.7226   | 0.831649    | no  |
| Mtx3    | 1.94611 | 2.22742  | 0.194784   | 0.29725  | 0.449107    | no  |
| Mul1    | 5.09392 | 5.00603  | -0.0251097 | 0.88465  | 0.935436    | no  |
| Mum1    | 20.0184 | 20.2499  | 0.016592   | 0.9095   | 0.950084    | no  |
| Mus81   | 20.3766 | 19.0806  | -0.0948093 | 0.54655  | 0.695074    | no  |
| Mut     | 9.05637 | 9.71015  | 0.100562   | 0.523    | 0.674765    | no  |
| Mutyh   | 6.25233 | 5.60194  | -0.158466  | 0.45235  | 0.609879    | no  |
| Mvb12a  | 55.5776 | 52.9926  | -0.0687132 | 0.66145  | 0.788123    | no  |
| Mvb12b  | 3.01057 | 5.34787  | 0.828926   | 5.00E-05 | 0.000236281 | yes |
| Mvd     | 16.4525 | 14.3229  | -0.199988  | 0.2234   | 0.3655      | no  |
| Mvk     | 3.39409 | 3.51975  | 0.0524494  | 0.8348   | 0.905362    | no  |
| Mvp     | 15.1151 | 14.8764  | -0.0229659 | 0.87885  | 0.93225     | no  |
| Mx1     | 24.1225 | 19.385   | -0.315442  | 0.0339   | 0.0782142   | no  |
| Mxd1    | 7.37869 | 6.6905   | -0.14125   | 0.3773   | 0.536204    | no  |
| Mxd3    | 21.0291 | 12.5977  | -0.739224  | 0.26145  | 0.407519    | no  |
| Mxd4    | 57.715  | 44.0005  | -0.391426  | 0.00925  | 0.0256214   | yes |
| Mxi1    | 7.16685 | 5.76212  | -0.31474   | 0.0483   | 0.105617    | no  |
| Myadm   | 20.1885 | 17.8861  | -0.174693  | 0.24785  | 0.3931      | no  |
| Myb     | 6.98682 | 6.85942  | -0.0265491 | 0.8751   | 0.929879    | no  |
| Mybbp1a | 30.0292 | 35.2306  | 0.230465   | 0.11075  | 0.21019     | no  |
| Mybl1   | 1.06276 | 0.599986 | -0.824818  | 0.00325  | 0.0102567   | yes |
| Mybl2   | 7.34144 | 6.11123  | -0.2646    | 0.1107   | 0.210123    | no  |
| Myc     | 13.8707 | 17.5158  | 0.336621   | 0.03375  | 0.0779242   | no  |
| Mycbp   | 9.11766 | 7.9746   | -0.193251  | 0.31565  | 0.46957     | no  |
| Mycbp2  | 27.1406 | 34.1779  | 0.332609   | 0.021    | 0.0520425   | no  |
| Myd88   | 53.6996 | 51.5441  | -0.059105  | 0.6794   | 0.801374    | no  |
| Myef2   | 13.39   | 12.9555  | -0.0475919 | 0.76525  | 0.860736    | no  |
| Myeov2  | 224.578 | 221.947  | -0.0169961 | 0.91185  | 0.951623    | no  |
| Myg1    | 27.2766 | 25.1408  | -0.117634  | 0.45945  | 0.61673     | no  |
| Myh9    | 377.849 | 418.758  | 0.148308   | 0.40685  | 0.565693    | no  |
| Myl12a  | 392.541 | 356.132  | -0.140431  | 0.33455  | 0.490511    | no  |
| Myl12b  | 650.283 | 657.386  | 0.0156742  | 0.91365  | 0.952699    | no  |
| Myl4    | 3.96342 | 4.56156  | 0.202778   | 0.4853   | 0.640587    | no  |
| Myl6    | 1983.99 | 1845.06  | -0.104736  | 0.4764   | 0.632625    | no  |
| Myl6b   | 2.40771 | 1.76757  | -0.445894  | 0.21185  | 0.351425    | no  |
| Mylip   | 23.2986 | 20.5076  | -0.184081  | 0.21785  | 0.358714    | no  |
| Mylpf   | 6.50634 | 6.43502  | -0.0159023 | 0.9498   | 0.972973    | no  |
| Mynn    | 7.71466 | 7.97587  | 0.0480397  | 0.75665  | 0.854822    | no  |
| Myo18a  | 22.1877 | 19.2667  | -0.203648  | 0.155    | 0.274438    | no  |
| Myo19   | 2.64892 | 3.15625  | 0.252809   | 0.3049   | 0.457687    | no  |
| Myo1c   | 6.30591 | 6.21682  | -0.020528  | 0.8965   | 0.942516    | no  |
| Myo1e   | 1.44264 | 1.7189   | 0.252766   | 0.23855  | 0.383425    | no  |
| Myo1f   | 232.164 | 240.775  | 0.0525379  | 0.723    | 0.831852    | no  |
| Myo1g   | 211.473 | 199.978  | -0.0806261 | 0.572    | 0.716352    | no  |
| Myo5a   | 4.82166 | 4.33188  | -0.154538  | 0.3048   | 0.457634    | no  |
| Myo9a   | 1.32512 | 1.13443  | -0.224149  | 0.2206   | 0.361951    | no  |

|         |         |         |             |          |             |     |
|---------|---------|---------|-------------|----------|-------------|-----|
| Myo9b   | 53.7647 | 60.7336 | 0.175836    | 0.2175   | 0.358339    | no  |
| Mypop   | 3.37636 | 3.29667 | -0.0344585  | 0.87825  | 0.931866    | no  |
| Mysm1   | 10.4711 | 10.4435 | -0.00380285 | 0.98     | 0.988614    | no  |
| Mzt1    | 27.0983 | 26.7514 | -0.0185895  | 0.90055  | 0.944944    | no  |
| Mzt2    | 7.09348 | 7.05254 | -0.00834892 | 0.96575  | 0.981322    | no  |
| N4bp1   | 25.6122 | 18.9466 | -0.434896   | 0.00255  | 0.00827285  | yes |
| N4bp2   | 4.58096 | 10.6745 | 1.22044     | 5.00E-05 | 0.000236281 | yes |
| N4bp2l1 | 28.0445 | 29.3825 | 0.0672439   | 0.65925  | 0.786465    | no  |
| N4bp2l2 | 7.26211 | 7.53077 | 0.0524072   | 0.72125  | 0.830732    | no  |
| N4bp3   | 7.71081 | 7.76502 | 0.0101071   | 0.95655  | 0.976726    | no  |
| N6amt1  | 8.95177 | 10.4602 | 0.224659    | 0.2165   | 0.357175    | no  |
| N6amt2  | 31.4147 | 29.6786 | -0.0820149  | 0.63285  | 0.766106    | no  |
| Naa10   | 66.4107 | 60.7926 | -0.127521   | 0.40235  | 0.561294    | no  |
| Naa15   | 20.1685 | 19.4105 | -0.0552669  | 0.7014   | 0.816826    | no  |
| Naa16   | 13.0192 | 11.3172 | -0.202124   | 0.18565  | 0.317039    | no  |
| Naa20   | 36.094  | 36.3119 | 0.00868341  | 0.95535  | 0.976122    | no  |
| Naa25   | 7.22154 | 9.40586 | 0.381254    | 0.0223   | 0.0548291   | no  |
| Naa30   | 12.7295 | 13.7392 | 0.110132    | 0.45385  | 0.611481    | no  |
| Naa35   | 20.2616 | 20.4948 | 0.0165131   | 0.9146   | 0.953169    | no  |
| Naa38   | 67.9818 | 59.8298 | -0.184286   | 0.3011   | 0.453536    | no  |
| Naa40   | 19.5585 | 18.7987 | -0.0571624  | 0.69385  | 0.81173     | no  |
| Naa50   | 20.0307 | 17.5846 | -0.187903   | 0.1944   | 0.328752    | no  |
| Naa60   | 69.4355 | 62.6413 | -0.148558   | 0.2927   | 0.443915    | no  |
| Naaa    | 5.71715 | 5.26007 | -0.120213   | 0.5223   | 0.674207    | no  |
| Nab1    | 42.037  | 33.562  | -0.324829   | 0.0227   | 0.0556652   | no  |
| Nab2    | 11.7668 | 11.5612 | -0.0254237  | 0.9625   | 0.979895    | no  |
| Nabp1   | 36.745  | 29.0816 | -0.337442   | 0.0204   | 0.0507373   | no  |
| Nabp2   | 77.1566 | 70.4566 | -0.131055   | 0.3717   | 0.530274    | no  |
| Naca    | 747.905 | 757.711 | 0.0187932   | 0.89845  | 0.943765    | no  |
| Nacc1   | 31.5836 | 32.8707 | 0.0576273   | 0.68615  | 0.806237    | no  |
| Nadk    | 39.3774 | 40.9278 | 0.0557137   | 0.69325  | 0.811338    | no  |
| Nadk2   | 6.49931 | 6.96389 | 0.0996072   | 0.57775  | 0.721212    | no  |
| Nadsyn1 | 7.50032 | 6.68034 | -0.16703    | 0.3475   | 0.504634    | no  |
| Nae1    | 32.2014 | 31.7695 | -0.0194832  | 0.89655  | 0.942555    | no  |
| Naf1    | 3.32917 | 3.91928 | 0.235424    | 0.23395  | 0.377968    | no  |
| Naga    | 19.3798 | 17.2928 | -0.164379   | 0.30335  | 0.456049    | no  |
| Nagk    | 7.54236 | 6.73214 | -0.163952   | 0.43395  | 0.592232    | no  |
| Naglu   | 4.80173 | 5.39448 | 0.16793     | 0.37895  | 0.537954    | no  |
| Nagpa   | 14.6397 | 14.4334 | -0.0204677  | 0.8986   | 0.943838    | no  |
| Naif1   | 2.01009 | 1.88531 | -0.0924584  | 0.7932   | 0.879351    | no  |
| Naip2   | 3.34515 | 2.77019 | -0.272089   | 0.1394   | 0.252143    | no  |
| Nampt   | 7.33824 | 6.64573 | -0.143007   | 0.37115  | 0.529704    | no  |
| Nanos1  | 1.90528 | 1.88423 | -0.0160291  | 0.94485  | 0.970126    | no  |
| Nanp    | 7.35486 | 6.91468 | -0.0890349  | 0.66965  | 0.79412     | no  |
| Nans    | 59.2014 | 49.4351 | -0.260098   | 0.07025  | 0.144244    | no  |
| Nap1l1  | 216.278 | 182.457 | -0.245334   | 0.1033   | 0.198522    | no  |
| Nap1l4  | 93.6423 | 94.5423 | 0.0137997   | 0.9246   | 0.958829    | no  |
| Napa    | 38.2267 | 40.1421 | 0.0705359   | 0.6229   | 0.758052    | no  |
| Napepld | 1.32411 | 1.45455 | 0.135549    | 0.57785  | 0.721285    | no  |
| Napg    | 19.857  | 18.0148 | -0.140464   | 0.3453   | 0.502214    | no  |
| Napsa   | 1.76341 | 1.41004 | -0.322636   | 0.32985  | 0.485516    | no  |
| Narf    | 10.4314 | 11.5235 | 0.143646    | 0.34035  | 0.496796    | no  |
| Narfl   | 10.8025 | 10.4523 | -0.0475473  | 0.7944   | 0.880197    | no  |
| Narg2   | 6.31952 | 7.30282 | 0.208638    | 0.20635  | 0.34426     | no  |
| Nars    | 52.5785 | 51.5978 | -0.0271648  | 0.8492   | 0.913955    | no  |
| Nars2   | 1.451   | 1.70126 | 0.229553    | 0.3318   | 0.487502    | no  |
| Nasp    | 32.2232 | 24.8645 | -0.374014   | 0.0142   | 0.037055    | yes |

|         |         |         |            |          |             |     |
|---------|---------|---------|------------|----------|-------------|-----|
| Nat10   | 20.054  | 24.1462 | 0.267903   | 0.0638   | 0.133252    | no  |
| Nat14   | 1.77338 | 1.66443 | -0.0914736 | 0.7666   | 0.86154     | no  |
| Nat2    | 8.88577 | 8.23885 | -0.109053  | 0.5726   | 0.716862    | no  |
| Nat6    | 4.35464 | 4.74826 | 0.124846   | 0.5535   | 0.701032    | no  |
| Nat9    | 6.55098 | 7.04211 | 0.104295   | 0.65345  | 0.782157    | no  |
| Nbas    | 4.36141 | 5.56038 | 0.350391   | 0.02725  | 0.0650993   | no  |
| Nbeal1  | 1.43114 | 1.70439 | 0.252095   | 0.1464   | 0.261978    | no  |
| Nbeal2  | 106.818 | 114.23  | 0.0967897  | 0.51175  | 0.664893    | no  |
| Nbn     | 6.25592 | 6.09313 | -0.038039  | 0.83635  | 0.906263    | no  |
| Nbr1    | 28.2367 | 28.5581 | 0.0163287  | 0.90905  | 0.949825    | no  |
| Ncald   | 31.8902 | 27.3855 | -0.219703  | 0.1256   | 0.232643    | no  |
| Ncapd2  | 38.8633 | 28.1115 | -0.467247  | 0.00095  | 0.00343861  | yes |
| Ncapd3  | 16.9793 | 13.6119 | -0.31891   | 0.02795  | 0.0664836   | no  |
| Ncapg   | 14.0441 | 8.00014 | -0.811863  | 0.00055  | 0.0021091   | yes |
| Ncapg2  | 7.93824 | 4.62934 | -0.778011  | 5.00E-05 | 0.000236281 | yes |
| Ncaph   | 21.2479 | 12.0506 | -0.818219  | 5.00E-05 | 0.000236281 | yes |
| Ncaph2  | 47.3339 | 41.17   | -0.201278  | 0.19695  | 0.332181    | no  |
| Ncbp1   | 50.8315 | 49.8527 | -0.0280509 | 0.84175  | 0.909559    | no  |
| Ncbp2   | 30.9934 | 30.1037 | -0.0420186 | 0.7762   | 0.868154    | no  |
| Nccrp1  | 3.29822 | 4.60024 | 0.480024   | 0.0471   | 0.103403    | no  |
| Ncdn    | 21.2004 | 23.3508 | 0.139379   | 0.32785  | 0.483419    | no  |
| Nceh1   | 6.20984 | 7.57569 | 0.286822   | 0.0739   | 0.1503      | no  |
| Ncf1    | 6.92208 | 7.26049 | 0.0688608  | 0.70515  | 0.819625    | no  |
| Ncf4    | 39.0943 | 33.6514 | -0.216292  | 0.15975  | 0.281275    | no  |
| Nck1    | 37.4473 | 33.9873 | -0.139865  | 0.3528   | 0.510378    | no  |
| Nck2    | 17.6528 | 20.6554 | 0.226628   | 0.13555  | 0.247066    | no  |
| Nckap1  | 5.54281 | 6.0843  | 0.134474   | 0.41605  | 0.574749    | no  |
| Nckap1l | 103.846 | 93.8443 | -0.146099  | 0.303    | 0.455659    | no  |
| Nckap5l | 8.56503 | 10.5004 | 0.293908   | 0.05225  | 0.112842    | no  |
| Nckipsd | 5.12545 | 5.47695 | 0.0956946  | 0.5982   | 0.73833     | no  |
| Ncl     | 70.6395 | 67.4595 | -0.0664535 | 0.64415  | 0.774815    | no  |
| Ncln    | 56.82   | 55.0959 | -0.0444559 | 0.7545   | 0.853431    | no  |
| Ncoa1   | 9.50345 | 8.90202 | -0.0943176 | 0.5222   | 0.674152    | no  |
| Ncoa2   | 21.3882 | 21.7751 | 0.0258651  | 0.85105  | 0.915125    | no  |
| Ncoa3   | 19.3778 | 18.8424 | -0.0404233 | 0.77675  | 0.868536    | no  |
| Ncoa4   | 28.2079 | 25.9196 | -0.122053  | 0.3973   | 0.556393    | no  |
| Ncoa5   | 25.4226 | 28.0457 | 0.141668   | 0.33525  | 0.491242    | no  |
| Ncoa6   | 14.9423 | 15.1843 | 0.0231834  | 0.8719   | 0.92803     | no  |
| Ncoa7   | 6.33443 | 6.42255 | 0.0199315  | 0.9067   | 0.948633    | no  |
| Ncor1   | 66.7574 | 72.4586 | 0.118231   | 0.43865  | 0.596743    | no  |
| Ncor2   | 13.6976 | 16.1088 | 0.233921   | 0.0997   | 0.192785    | no  |
| Ncstn   | 38.2039 | 34.5276 | -0.145973  | 0.66195  | 0.78854     | no  |
| Ndc1    | 3.79876 | 3.30269 | -0.201886  | 0.3347   | 0.490609    | no  |
| Ndc80   | 18.5464 | 11.7027 | -0.664298  | 5.00E-05 | 0.000236281 | yes |
| Nde1    | 55.1352 | 46.5181 | -0.245181  | 0.08725  | 0.172699    | no  |
| Ndel1   | 23.1218 | 22.4985 | -0.0394285 | 0.794    | 0.87992     | no  |
| Ndfip1  | 246.861 | 239.828 | -0.0417011 | 0.7689   | 0.863149    | no  |
| Ndfip2  | 31.7221 | 29.5244 | -0.103582  | 0.48325  | 0.638819    | no  |
| Ndni2   | 21.8117 | 18.99   | -0.199865  | 0.22495  | 0.367448    | no  |
| Ndor1   | 16.8047 | 18.8218 | 0.163546   | 0.26505  | 0.411902    | no  |
| Ndr1    | 2.73139 | 2.66946 | -0.0330879 | 0.87755  | 0.931417    | no  |
| Ndr2    | 2.39176 | 1.48952 | -0.683223  | 0.0129   | 0.0341475   | yes |
| Ndr3    | 40.9735 | 36.025  | -0.185692  | 0.1978   | 0.333288    | no  |
| Ndst1   | 8.80196 | 9.74721 | 0.147165   | 0.32455  | 0.479696    | no  |
| Ndst2   | 7.54517 | 8.40539 | 0.155761   | 0.33005  | 0.48574     | no  |
| Ndufa1  | 216.01  | 186.855 | -0.209179  | 0.16045  | 0.282254    | no  |
| Ndufa10 | 110.332 | 106.285 | -0.0539075 | 0.7054   | 0.819753    | no  |

|         |         |         |              |          |             |     |
|---------|---------|---------|--------------|----------|-------------|-----|
| Ndufa11 | 15.4076 | 14.7296 | -0.0649244   | 0.67445  | 0.797534    | no  |
| Ndufa12 | 69.8815 | 79.8179 | 0.191802     | 0.24065  | 0.385698    | no  |
| Ndufa13 | 105.706 | 100.367 | -0.0747774   | 0.6005   | 0.740198    | no  |
| Ndufa2  | 175.556 | 167.267 | -0.0697852   | 0.6913   | 0.809942    | no  |
| Ndufa3  | 427.015 | 413.224 | -0.0473633   | 0.7521   | 0.851891    | no  |
| Ndufa4  | 412.197 | 368.523 | -0.16158     | 0.2609   | 0.406841    | no  |
| Ndufa5  | 49.7073 | 50.7355 | 0.0295364    | 0.8665   | 0.924779    | no  |
| Ndufa6  | 252.852 | 219.792 | -0.202154    | 0.1604   | 0.282173    | no  |
| Ndufa7  | 154.513 | 162.283 | 0.070789     | 0.63085  | 0.764406    | no  |
| Ndufa8  | 104.146 | 99.1441 | -0.0710052   | 0.6335   | 0.766551    | no  |
| Ndufa9  | 78.2872 | 77.8971 | -0.00720539  | 0.9623   | 0.979819    | no  |
| Ndufab1 | 37.5938 | 39.516  | 0.0719436    | 0.67355  | 0.796951    | no  |
| Ndufaf1 | 12.1669 | 11.7214 | -0.0538194   | 0.7647   | 0.860364    | no  |
| Ndufaf2 | 15.7459 | 15.2949 | -0.0419243   | 0.84455  | 0.911371    | no  |
| Ndufaf3 | 16.0882 | 16.2706 | 0.0162641    | 0.9287   | 0.96108     | no  |
| Ndufaf4 | 4.96794 | 5.66358 | 0.189067     | 0.2773   | 0.426451    | no  |
| Ndufaf5 | 5.16529 | 5.61266 | 0.119837     | 0.5165   | 0.669254    | no  |
| Ndufaf6 | 3.93066 | 4.64433 | 0.240698     | 0.36955  | 0.528115    | no  |
| Ndufaf7 | 10.1154 | 11.8831 | 0.232354     | 0.1667   | 0.291087    | no  |
| Ndufb10 | 186.779 | 191.187 | 0.0336517    | 0.81975  | 0.896145    | no  |
| Ndufb11 | 195.925 | 179.481 | -0.126472    | 0.52535  | 0.676906    | no  |
| Ndufb2  | 82.7674 | 87.4573 | 0.0795166    | 0.6438   | 0.77454     | no  |
| Ndufb3  | 130.812 | 129.468 | -0.0148977   | 0.927    | 0.960222    | no  |
| Ndufb4  | 110.288 | 113.951 | 0.0471402    | 0.76925  | 0.863377    | no  |
| Ndufb5  | 95.3018 | 90.4666 | -0.0751186   | 0.60455  | 0.74336     | no  |
| Ndufb6  | 90.5665 | 86.4924 | -0.0664033   | 0.6772   | 0.799648    | no  |
| Ndufb7  | 257.437 | 227.371 | -0.179172    | 0.21535  | 0.355743    | no  |
| Ndufb8  | 110.006 | 101.991 | -0.109141    | 0.47865  | 0.634574    | no  |
| Ndufb9  | 163.982 | 149.198 | -0.136309    | 0.3555   | 0.513179    | no  |
| Ndufc1  | 78.5564 | 87.902  | 0.162166     | 0.35635  | 0.514133    | no  |
| Ndufc2  | 82.6797 | 73.7873 | -0.16416     | 0.29315  | 0.444464    | no  |
| Ndufs1  | 38.5266 | 36.9398 | -0.0606763   | 0.6864   | 0.806383    | no  |
| Ndufs2  | 115.426 | 112.351 | -0.0389576   | 0.7807   | 0.871048    | no  |
| Ndufs3  | 84.7519 | 87.4633 | 0.0454315    | 0.7563   | 0.854564    | no  |
| Ndufs4  | 41.7379 | 38.0643 | -0.13292     | 0.37775  | 0.536714    | no  |
| Ndufs5  | 88.0597 | 81.8737 | -0.105083    | 0.5298   | 0.680875    | no  |
| Ndufs6  | 110.096 | 100.079 | -0.137617    | 0.3787   | 0.537685    | no  |
| Ndufs7  | 76.6559 | 75.4865 | -0.0221777   | 0.8844   | 0.935354    | no  |
| Ndufs8  | 90.9272 | 86.2144 | -0.0767825   | 0.6083   | 0.746216    | no  |
| Ndufv1  | 45.7794 | 45.7629 | -0.000520875 | 0.9985   | 0.998741    | no  |
| Ndufv2  | 56.0878 | 51.7884 | -0.115059    | 0.4217   | 0.580102    | no  |
| Ndufv3  | 189.503 | 182.169 | -0.0569482   | 0.72765  | 0.835024    | no  |
| Nebi    | 7.48633 | 5.84741 | -0.356462    | 0.039    | 0.0881202   | no  |
| Necap1  | 9.35378 | 7.85326 | -0.252258    | 0.151    | 0.268684    | no  |
| Necap2  | 43.0372 | 41.5043 | -0.0523232   | 0.71025  | 0.823207    | no  |
| Nedd1   | 11.8766 | 10.7921 | -0.138141    | 0.373    | 0.531667    | no  |
| Nedd4   | 27.1366 | 23.8388 | -0.186929    | 0.1912   | 0.324476    | no  |
| Nedd4l  | 1.82531 | 2.48161 | 0.443133     | 0.0117   | 0.0313912   | yes |
| Nedd8   | 236.792 | 231.281 | -0.033973    | 0.8168   | 0.894236    | no  |
| Nedd9   | 35.5776 | 36.0542 | 0.0191967    | 0.8877   | 0.937033    | no  |
| Nefh    | 2.202   | 4.20929 | 0.934766     | 0.12895  | 0.237483    | no  |
| Neil1   | 10.7565 | 12.0398 | 0.162608     | 0.3976   | 0.556681    | no  |
| Neil3   | 9.33891 | 4.33958 | -1.1057      | 5.00E-05 | 0.000236281 | yes |
| Nek1    | 2.58975 | 3.19196 | 0.301631     | 0.1119   | 0.211888    | no  |
| Nek2    | 12.0377 | 6.53083 | -0.882219    | 5.00E-05 | 0.000236281 | yes |
| Nek3    | 3.43074 | 2.99716 | -0.194923    | 0.39265  | 0.551764    | no  |
| Nek7    | 36.2192 | 39.8236 | 0.136871     | 0.3393   | 0.495684    | no  |

|          |         |         |             |         |            |     |
|----------|---------|---------|-------------|---------|------------|-----|
| Nek8     | 3.72295 | 3.40287 | -0.129694   | 0.5175  | 0.670021   | no  |
| Nek9     | 28.2519 | 29.8354 | 0.0786812   | 0.56785 | 0.71285    | no  |
| Nelfa    | 16.7605 | 16.4586 | -0.0262205  | 0.86805 | 0.925747   | no  |
| Nelfb    | 63.2058 | 60.2435 | -0.0692514  | 0.6175  | 0.75399    | no  |
| Nelfcd   | 24.8361 | 25.5688 | 0.0419456   | 0.8255  | 0.899755   | no  |
| Nelfe    | 18.3049 | 16.1768 | -0.17831    | 0.29515 | 0.446671   | no  |
| Nemf     | 25.845  | 26.2912 | 0.0246982   | 0.865   | 0.92389    | no  |
| Nenf     | 5.6818  | 4.10908 | -0.467533   | 0.1519  | 0.269959   | no  |
| Net1     | 9.26329 | 10.1929 | 0.137975    | 0.3743  | 0.532971   | no  |
| Neu1     | 13.4338 | 15.7993 | 0.23399     | 0.1212  | 0.225976   | no  |
| Neu3     | 1.4568  | 1.18851 | -0.293651   | 0.2556  | 0.400479   | no  |
| Neurl2   | 2.47397 | 1.87161 | -0.402543   | 0.82885 | 0.901694   | no  |
| Neurl3   | 24.6889 | 28.5805 | 0.211169    | 0.1572  | 0.277582   | no  |
| Neurl4   | 13.6076 | 15.2549 | 0.164856    | 0.26115 | 0.407159   | no  |
| Nf2      | 17.783  | 22.108  | 0.314072    | 0.0372  | 0.0846301  | no  |
| Nfat5    | 12.9155 | 12.8147 | -0.011301   | 0.94035 | 0.967782   | no  |
| Nfatc1   | 51.4299 | 58.9029 | 0.195729    | 0.17015 | 0.295706   | no  |
| Nfatc2   | 24.3399 | 28.0238 | 0.203333    | 0.1515  | 0.269377   | no  |
| Nfatc2ip | 11.571  | 11.2664 | -0.0384873  | 0.79975 | 0.883518   | no  |
| Nfatc3   | 125.343 | 124.629 | -0.00824481 | 0.9557  | 0.976338   | no  |
| Nfe2     | 1.13958 | 2.58323 | 1.18067     | 0.00095 | 0.00343861 | yes |
| Nfe2l1   | 21.3763 | 22.1608 | 0.0519974   | 0.71985 | 0.829729   | no  |
| Nfe2l2   | 19.2071 | 26.6091 | 0.470283    | 0.0021  | 0.00696828 | yes |
| Nfic     | 8.73625 | 8.09143 | -0.110618   | 0.46075 | 0.617899   | no  |
| Nfil3    | 6.04718 | 6.43587 | 0.0898723   | 0.6423  | 0.773394   | no  |
| Nfkb1    | 67.7272 | 76.8274 | 0.181886    | 0.199   | 0.334903   | no  |
| Nfkb2    | 23.9096 | 27.3104 | 0.191864    | 0.20855 | 0.347118   | no  |
| Nfkbia   | 328.09  | 389.763 | 0.248503    | 0.08315 | 0.165947   | no  |
| Nfkbib   | 26.1732 | 26.3374 | 0.00902291  | 0.95305 | 0.974859   | no  |
| Nfkbid   | 28.609  | 27.5268 | -0.0556314  | 0.7142  | 0.825928   | no  |
| Nfkbie   | 17.4479 | 17.4044 | -0.00360697 | 0.98225 | 0.98978    | no  |
| Nfkbil1  | 14.8606 | 14.6762 | -0.0180146  | 0.9153  | 0.953532   | no  |
| Nfkbiz   | 38.0013 | 50.6638 | 0.414906    | 0.0046  | 0.0139281  | yes |
| Nfrkb    | 21.582  | 22.7988 | 0.0791288   | 0.58455 | 0.72709    | no  |
| Nfs1     | 23.6861 | 24.2943 | 0.0365748   | 0.83645 | 0.906302   | no  |
| Nfu1     | 41.2958 | 42.6346 | 0.0460307   | 0.76955 | 0.86359    | no  |
| Nfx1     | 25.6166 | 26.4538 | 0.0463958   | 0.739   | 0.843196   | no  |
| Nfxl1    | 4.72602 | 4.67635 | -0.0152423  | 0.93025 | 0.961894   | no  |
| Nfya     | 25.1327 | 22.4859 | -0.160544   | 0.2672  | 0.414586   | no  |
| Nfyb     | 33.5903 | 30.5265 | -0.137983   | 0.3488  | 0.506106   | no  |
| Nfyc     | 36.2079 | 31.4855 | -0.201618   | 0.1755  | 0.303027   | no  |
| Ngdn     | 70.2943 | 72.9963 | 0.0544153   | 0.71195 | 0.824312   | no  |
| Ngfrap1  | 44.0735 | 38.3291 | -0.201471   | 0.2119  | 0.351492   | no  |
| Ngly1    | 32.4502 | 37.2899 | 0.200559    | 0.1955  | 0.330217   | no  |
| Ngrn     | 20.7465 | 22.8315 | 0.138158    | 0.399   | 0.558043   | no  |
| Nhej1    | 5.04651 | 4.13309 | -0.288067   | 0.29145 | 0.442447   | no  |
| Nhlrc2   | 10.7869 | 11.2649 | 0.0625509   | 0.6844  | 0.805052   | no  |
| Nhlrc3   | 8.41371 | 8.96482 | 0.0915325   | 0.63695 | 0.76917    | no  |
| Nhp2     | 59.0485 | 58.7384 | -0.00759588 | 0.97605 | 0.986787   | no  |
| Nhp2l1   | 98.0941 | 91.927  | -0.0936782  | 0.5113  | 0.664492   | no  |
| Nhsl2    | 3.77157 | 4.44665 | 0.237552    | 0.12625 | 0.23351    | no  |
| Nif3l1   | 10.5264 | 11.5061 | 0.12838     | 0.4454  | 0.603054   | no  |
| Nifk     | 23.235  | 23.7781 | 0.0333295   | 0.8238  | 0.898568   | no  |
| Nin      | 26.1228 | 27.5039 | 0.0743273   | 0.59765 | 0.737871   | no  |
| Ninj1    | 4.53123 | 4.76118 | 0.0714161   | 0.78215 | 0.872073   | no  |
| Nip7     | 12.6191 | 13.7654 | 0.125434    | 0.42355 | 0.581955   | no  |
| Nipa2    | 17.2432 | 16.319  | -0.079475   | 0.6805  | 0.802095   | no  |

|           |         |          |              |         |           |     |
|-----------|---------|----------|--------------|---------|-----------|-----|
| Nipal1    | 1.15836 | 1.71675  | 0.567597     | 0.0181  | 0.0456948 | yes |
| Nipal3    | 40.86   | 39.3692  | -0.0536228   | 0.70775 | 0.821483  | no  |
| Nipbl     | 29.5696 | 30.1584  | 0.0284457    | 0.8435  | 0.910669  | no  |
| Nipsnap1  | 13.4012 | 15.8011  | 0.237665     | 0.15005 | 0.267344  | no  |
| Nipsnap3b | 26.5188 | 23.8573  | -0.152584    | 0.33805 | 0.49438   | no  |
| Nisch     | 41.8238 | 48.8251  | 0.223297     | 0.11245 | 0.212667  | no  |
| Nit1      | 24.6742 | 22.3287  | -0.144104    | 0.5502  | 0.698193  | no  |
| Nit2      | 9.60297 | 11.8442  | 0.302627     | 0.1136  | 0.214463  | no  |
| Nkap      | 6.95032 | 6.72268  | -0.0480425   | 0.76335 | 0.859475  | no  |
| Nkg7      | 1975.35 | 1724.96  | -0.195545    | 0.1985  | 0.334252  | no  |
| Nkiras1   | 2.37821 | 2.37657  | -0.000996044 | 0.99445 | 0.996356  | no  |
| Nkiras2   | 5.99049 | 5.50164  | -0.122811    | 0.6498  | 0.779129  | no  |
| Nkrf      | 2.65539 | 3.21583  | 0.276267     | 0.17495 | 0.302233  | no  |
| Nktr      | 33.7929 | 33.2367  | -0.0239445   | 0.86315 | 0.922654  | no  |
| Nle1      | 7.04597 | 8.566    | 0.281824     | 0.14045 | 0.253698  | no  |
| Nlk       | 15.5778 | 16.8574  | 0.113888     | 0.43515 | 0.593227  | no  |
| Nln       | 5.52993 | 5.88792  | 0.0904976    | 0.59745 | 0.737753  | no  |
| Nlrc3     | 45.6078 | 45.5135  | -0.00298613  | 0.98395 | 0.990673  | no  |
| Nlrc5     | 94.6258 | 80.7377  | -0.228991    | 0.10985 | 0.20879   | no  |
| Nlrp1a    | 1.80916 | 1.59533  | -0.181467    | 0.3971  | 0.556202  | no  |
| Nlrx1     | 3.18159 | 4.2291   | 0.410604     | 0.02975 | 0.0701013 | no  |
| Nmb       | 27.8326 | 23.7672  | -0.227803    | 0.23045 | 0.37394   | no  |
| Nmd3      | 30.7704 | 30.6524  | -0.00554284  | 0.97    | 0.983728  | no  |
| Nme1      | 73.751  | 72.7832  | -0.0190576   | 0.8979  | 0.94337   | no  |
| Nme2      | 457.294 | 529.485  | 0.211466     | 0.13945 | 0.252201  | no  |
| Nme3      | 40.1099 | 44.1838  | 0.139561     | 0.7499  | 0.850477  | no  |
| Nme6      | 2.64113 | 2.42752  | -0.121672    | 0.71975 | 0.829654  | no  |
| Nme7      | 9.02951 | 8.03162  | -0.168957    | 0.39595 | 0.554976  | no  |
| Nmi       | 57.3052 | 54.5789  | -0.0703232   | 0.6327  | 0.766017  | no  |
| Nmnat1    | 5.19066 | 5.56045  | 0.099284     | 0.7019  | 0.817085  | no  |
| Nmnat2    | 1.26563 | 0.783952 | -0.691016    | 0.00805 | 0.0226766 | yes |
| Nmnat3    | 1.48022 | 1.69033  | 0.191491     | 0.4985  | 0.652797  | no  |
| Nmral1    | 10.4765 | 7.10161  | -0.560941    | 0.00505 | 0.0151078 | yes |
| Nmrk1     | 11.5436 | 13.1236  | 0.185077     | 0.29105 | 0.442011  | no  |
| Nmt1      | 62.2418 | 54.4231  | -0.193665    | 0.1748  | 0.302062  | no  |
| Nmt2      | 9.21792 | 9.09241  | -0.0197777   | 0.89855 | 0.943838  | no  |
| Nnt       | 6.64714 | 6.23802  | -0.0916444   | 0.5881  | 0.730077  | no  |
| Noa1      | 13.9287 | 14.837   | 0.0911368    | 0.5729  | 0.717136  | no  |
| Nob1      | 26.1175 | 27.8529  | 0.0928113    | 0.5432  | 0.692323  | no  |
| Noc3l     | 7.44657 | 8.31268  | 0.158737     | 0.32315 | 0.478177  | no  |
| Noc4l     | 16.8405 | 18.3736  | 0.125695     | 0.43005 | 0.588343  | no  |
| Nod1      | 69.4521 | 53.1856  | -0.384983    | 0.0062  | 0.0180576 | yes |
| Nol10     | 11.2366 | 9.89999  | -0.182709    | 0.2545  | 0.399163  | no  |
| Nol11     | 13.3309 | 14.1788  | 0.0889588    | 0.5588  | 0.70558   | no  |
| Nol12     | 14.7748 | 14.519   | -0.0251966   | 0.87345 | 0.928895  | no  |
| Nol6      | 15.5282 | 18.1758  | 0.227125     | 0.1186  | 0.222108  | no  |
| Nol7      | 84.7494 | 77.4555  | -0.129836    | 0.53005 | 0.68106   | no  |
| Nol8      | 12.4307 | 11.9368  | -0.0584962   | 0.69915 | 0.815511  | no  |
| Nol9      | 15.3268 | 16.2078  | 0.0806353    | 0.597   | 0.737326  | no  |
| Nolc1     | 19.3771 | 22.1673  | 0.194082     | 0.18825 | 0.320657  | no  |
| Nom1      | 14.602  | 14.8269  | 0.022054     | 0.88565 | 0.936042  | no  |
| Nomo1     | 17.3449 | 19.6103  | 0.1771       | 0.2174  | 0.358274  | no  |
| Nono      | 203.025 | 202.71   | -0.00223964  | 0.9879  | 0.992965  | no  |
| Nop10     | 71.7408 | 74.4794  | 0.0540474    | 0.7274  | 0.834859  | no  |
| Nop14     | 16.1773 | 17.6404  | 0.124916     | 0.4125  | 0.57131   | no  |
| Nop16     | 9.34702 | 11.8673  | 0.344408     | 0.05645 | 0.120577  | no  |
| Nop2      | 14.4698 | 15.9158  | 0.137413     | 0.38185 | 0.540917  | no  |



|         |         |          |             |          |             |     |
|---------|---------|----------|-------------|----------|-------------|-----|
| Nop56   | 71.0316 | 67.4572  | -0.0744904  | 0.7249   | 0.833142    | no  |
| Nop58   | 41.4489 | 47.707   | 0.202869    | 0.158    | 0.278778    | no  |
| Nop9    | 13.1043 | 13.401   | 0.0323002   | 0.8326   | 0.903961    | no  |
| Nosip   | 42.6179 | 38.9942  | -0.1282     | 0.37015  | 0.528747    | no  |
| Notch1  | 24.3474 | 26.2293  | 0.107414    | 0.4466   | 0.604181    | no  |
| Notch2  | 13.6704 | 13.9444  | 0.0286239   | 0.8427   | 0.910112    | no  |
| Notch3  | 2.86493 | 0.71543  | -2.00162    | 5.00E-05 | 0.000236281 | yes |
| Nox1    | 1.63145 | 1.30764  | -0.319191   | 0.6679   | 0.792797    | no  |
| Npat    | 6.01375 | 5.75757  | -0.0628057  | 0.67875  | 0.800728    | no  |
| Npc1    | 14.135  | 16.2271  | 0.199133    | 0.32655  | 0.481865    | no  |
| Npc2    | 97.2639 | 96.3046  | -0.0142996  | 0.9188   | 0.955641    | no  |
| Npdc1   | 0.99665 | 2.2688   | 1.18677     | 0.0019   | 0.00637506  | yes |
| Npep1   | 35.7453 | 37.2883  | 0.0609676   | 0.67295  | 0.796468    | no  |
| Npepps  | 13.1106 | 12.1026  | -0.115415   | 0.45475  | 0.612471    | no  |
| Npff    | 3.11659 | 3.68585  | 0.242031    | 0.5844   | 0.726993    | no  |
| Nploc4  | 21.6047 | 20.8142  | -0.0537722  | 0.7085   | 0.821976    | no  |
| Npm1    | 478.715 | 479.858  | 0.00343906  | 0.98105  | 0.989178    | no  |
| Npm3    | 179.455 | 152.847  | -0.231536   | 0.10185  | 0.196206    | no  |
| Npr12   | 26.4774 | 24.5681  | -0.107975   | 0.4999   | 0.654145    | no  |
| Npr13   | 9.44559 | 11.1573  | 0.240272    | 0.20685  | 0.344939    | no  |
| Nptn    | 109.798 | 132.182  | 0.267672    | 0.05905  | 0.125199    | no  |
| Nqo2    | 15.0104 | 14.987   | -0.00225479 | 0.991    | 0.994494    | no  |
| Nr1d2   | 6.59802 | 6.67448  | 0.0166204   | 0.917    | 0.9545      | no  |
| Nr1h2   | 65.8666 | 60.9319  | -0.112349   | 0.4405   | 0.598498    | no  |
| Nr1h3   | 1.10845 | 0.920236 | -0.268472   | 0.45255  | 0.610102    | no  |
| Nr2c1   | 1.4086  | 1.81967  | 0.369409    | 0.11465  | 0.216075    | no  |
| Nr2c2   | 9.5254  | 8.97748  | -0.0854692  | 0.69095  | 0.809693    | no  |
| Nr2c2ap | 31.2024 | 34.291   | 0.136174    | 0.5232   | 0.674974    | no  |
| Nr2f6   | 3.82682 | 4.08863  | 0.0954708   | 0.65475  | 0.782976    | no  |
| Nr3c1   | 23.1688 | 19.1687  | -0.273433   | 0.056    | 0.119757    | no  |
| Nr4a1   | 24.3045 | 24.69    | 0.0226997   | 0.8796   | 0.932569    | no  |
| Nr4a2   | 5.74913 | 6.25091  | 0.120722    | 0.49805  | 0.65239     | no  |
| Nr4a3   | 2.06863 | 1.73277  | -0.255599   | 0.35745  | 0.515299    | no  |
| Nradd   | 12.0444 | 10.4996  | -0.19802    | 0.30515  | 0.457965    | no  |
| Nrarp   | 8.02894 | 3.1399   | -1.35449    | 5.00E-05 | 0.000236281 | yes |
| Nras    | 33.553  | 31.4399  | -0.0938488  | 0.51375  | 0.666645    | no  |
| Nrbf2   | 26.9807 | 23.2029  | -0.217621   | 0.15685  | 0.277088    | no  |
| Nrbp1   | 76.0213 | 71.9489  | -0.07943    | 0.82805  | 0.901199    | no  |
| Nrbp2   | 1.41407 | 1.90674  | 0.43126     | 0.1046   | 0.200469    | no  |
| Nrd1    | 40.2742 | 39.5376  | -0.026628   | 0.89045  | 0.938644    | no  |
| Nrde2   | 9.65046 | 9.32611  | -0.0493232  | 0.75405  | 0.8531      | no  |
| Nrf1    | 26.1354 | 24.706   | -0.0811436  | 0.5903   | 0.731817    | no  |
| Nrg4    | 3.70654 | 3.53945  | -0.0665482  | 0.8928   | 0.94004     | no  |
| Nrip1   | 8.76018 | 12.1418  | 0.470947    | 0.00225  | 0.00740543  | yes |
| Nrm     | 37.7752 | 29.3509  | -0.364032   | 0.0201   | 0.050067    | no  |
| Nrn1l   | 1.07128 | 0.342564 | -1.64488    | 0.0872   | 0.172624    | no  |
| Nrp1    | 18.3766 | 27.3232  | 0.572262    | 5.00E-05 | 0.000236281 | yes |
| Nrp2    | 2.30043 | 2.12123  | -0.117004   | 0.5196   | 0.671705    | no  |
| Nrros   | 36.6453 | 38.2168  | 0.0605788   | 0.6619   | 0.788507    | no  |
| Nsa2    | 127.261 | 120.153  | -0.0829161  | 0.5595   | 0.706035    | no  |
| Nsd1    | 19.7878 | 22.2683  | 0.170383    | 0.2326   | 0.376398    | no  |
| Nsdhl   | 12.7758 | 11.6019  | -0.139052   | 0.39605  | 0.555039    | no  |
| Nsf     | 28.26   | 24.6051  | -0.199807   | 0.1604   | 0.282173    | no  |
| Nsfl1c  | 54.8479 | 53.0549  | -0.0479505  | 0.74225  | 0.845387    | no  |
| Nsg2    | 7.98696 | 14.0655  | 0.816439    | 5.00E-05 | 0.000236281 | yes |
| Nsl1    | 4.01033 | 2.46713  | -0.700888   | 0.00105  | 0.00375607  | yes |
| Nsmaf   | 88.1508 | 86.5367  | -0.0266603  | 0.8501   | 0.91448     | no  |

|          |         |          |             |          |             |     |
|----------|---------|----------|-------------|----------|-------------|-----|
| Nsmce1   | 44.5597 | 40.2411  | -0.147069   | 0.34775  | 0.504935    | no  |
| Nsmce2   | 26.0436 | 23.9471  | -0.12108    | 0.467    | 0.623816    | no  |
| Nsmce4a  | 65.708  | 58.125   | -0.17691    | 0.2198   | 0.36099     | no  |
| Nsmf     | 7.22237 | 6.34033  | -0.187914   | 0.27655  | 0.425566    | no  |
| Nsun2    | 25.2756 | 27.6557  | 0.129828    | 0.3684   | 0.526962    | no  |
| Nsun3    | 6.63621 | 8.07202  | 0.28257     | 0.17985  | 0.309124    | no  |
| Nsun4    | 3.54441 | 3.75918  | 0.084871    | 0.65425  | 0.782736    | no  |
| Nsun5    | 6.95753 | 7.66754  | 0.14019     | 0.7433   | 0.84601     | no  |
| Nsun6    | 5.05868 | 5.63797  | 0.156414    | 0.3954   | 0.554503    | no  |
| Nt5c     | 129.636 | 137.248  | 0.0823227   | 0.7718   | 0.865207    | no  |
| Nt5c2    | 5.84345 | 5.74405  | -0.0247508  | 0.88605  | 0.936215    | no  |
| Nt5c3    | 36.553  | 34.9704  | -0.063857   | 0.6655   | 0.790993    | no  |
| Nt5c3b   | 68.6976 | 57.6036  | -0.2541     | 0.0822   | 0.164298    | no  |
| Nt5dc1   | 21.3625 | 20.6326  | -0.0501547  | 0.73585  | 0.841002    | no  |
| Nt5dc2   | 1.50587 | 0.824401 | -0.86918    | 0.03335  | 0.0771723   | no  |
| Nt5dc3   | 3.41844 | 4.22376  | 0.30519     | 0.07325  | 0.14918     | no  |
| Nt5e     | 10.1856 | 11.9045  | 0.224981    | 0.15015  | 0.267482    | no  |
| Nt5m     | 12.5529 | 13.343   | 0.0880518   | 0.6299   | 0.763596    | no  |
| Ntan1    | 71.4356 | 70.2364  | -0.0244245  | 0.89175  | 0.939411    | no  |
| Nthl1    | 1.63071 | 1.78114  | 0.127305    | 0.7332   | 0.838951    | no  |
| Ntmt1    | 9.58595 | 9.4826   | -0.0156387  | 0.9438   | 0.969593    | no  |
| Ntng2    | 5.12001 | 5.86344  | 0.1956      | 0.6198   | 0.755739    | no  |
| Ntpcr    | 13.8014 | 13.3215  | -0.0510596  | 0.7877   | 0.875895    | no  |
| Nub1     | 59.1826 | 53.1492  | -0.155124   | 0.26945  | 0.417242    | no  |
| Nubp1    | 28.7569 | 25.1057  | -0.195893   | 0.21775  | 0.358608    | no  |
| Nubp2    | 52.5865 | 52.7761  | 0.00519204  | 0.9698   | 0.983653    | no  |
| Nubpl    | 2.38088 | 2.79349  | 0.230572    | 0.45125  | 0.608721    | no  |
| Nucb1    | 85.6558 | 87.6023  | 0.0324165   | 0.81045  | 0.890336    | no  |
| Nucb2    | 1.81645 | 2.14239  | 0.238099    | 0.41595  | 0.574656    | no  |
| Nucks1   | 18.162  | 15.8574  | -0.195768   | 0.1691   | 0.294222    | no  |
| Nudc     | 76.4615 | 80.0279  | 0.0657689   | 0.6445   | 0.775078    | no  |
| Nudcd1   | 4.9963  | 4.61702  | -0.113898   | 0.65955  | 0.786663    | no  |
| Nudcd2   | 18.2049 | 18.2514  | 0.00368026  | 0.9818   | 0.989581    | no  |
| Nudcd3   | 27.2287 | 21.8135  | -0.319908   | 0.02675  | 0.0641066   | no  |
| Nudt1    | 17.9299 | 13.9009  | -0.367188   | 0.0554   | 0.11864     | no  |
| Nudt13   | 3.75477 | 4.00282  | 0.0922904   | 0.65815  | 0.785591    | no  |
| Nudt14   | 19.1527 | 19.2072  | 0.00410169  | 0.9774   | 0.987431    | no  |
| Nudt15   | 2.29414 | 1.88064  | -0.286729   | 0.2447   | 0.389804    | no  |
| Nudt16   | 16.5154 | 16.4969  | -0.00162087 | 0.99455  | 0.996371    | no  |
| Nudt16l1 | 60.9549 | 58.3635  | -0.0626752  | 0.7034   | 0.818264    | no  |
| Nudt17   | 2.68482 | 2.51823  | -0.092417   | 0.8835   | 0.934836    | no  |
| Nudt18   | 7.04954 | 7.01845  | -0.00637682 | 0.9696   | 0.983591    | no  |
| Nudt19   | 17.3504 | 18.2932  | 0.0763369   | 0.63225  | 0.765669    | no  |
| Nudt2    | 5.53999 | 5.79906  | 0.0659366   | 0.8095   | 0.889777    | no  |
| Nudt21   | 108.687 | 100.15   | -0.11802    | 0.4105   | 0.569445    | no  |
| Nudt22   | 10.2893 | 8.19134  | -0.328978   | 0.1298   | 0.238737    | no  |
| Nudt3    | 43.1493 | 41.7068  | -0.0490547  | 0.7335   | 0.839077    | no  |
| Nudt4    | 25.9361 | 18.6445  | -0.476213   | 0.00115  | 0.00407292  | yes |
| Nudt5    | 20.2946 | 19.68    | -0.0443639  | 0.7849   | 0.87409     | no  |
| Nudt6    | 9.52246 | 9.92106  | 0.0591597   | 0.77585  | 0.867942    | no  |
| Nudt7    | 9.73744 | 11.2188  | 0.204305    | 0.37435  | 0.533021    | no  |
| Nudt8    | 8.22976 | 11.1503  | 0.438157    | 0.0637   | 0.133079    | no  |
| Nudt9    | 25.2148 | 26.5733  | 0.0757074   | 0.6327   | 0.766017    | no  |
| Nuf2     | 14.2401 | 7.76698  | -0.874535   | 5.00E-05 | 0.000236281 | yes |
| Nufip1   | 6.93654 | 7.43867  | 0.100829    | 0.53745  | 0.68749     | no  |
| Nufip2   | 10.7878 | 11.4424  | 0.0849881   | 0.55505  | 0.702214    | no  |
| Numa1    | 49.9895 | 50.8563  | 0.0248022   | 0.8631   | 0.922629    | no  |

|        |         |         |             |          |             |     |
|--------|---------|---------|-------------|----------|-------------|-----|
| Numb   | 9.04139 | 8.39282 | -0.107389   | 0.50025  | 0.654458    | no  |
| Numb1  | 2.74519 | 2.11176 | -0.37846    | 0.0994   | 0.192357    | no  |
| Nup107 | 19.419  | 16.5575 | -0.229979   | 0.1283   | 0.236527    | no  |
| Nup133 | 4.0706  | 3.18868 | -0.352284   | 0.03825  | 0.0866614   | no  |
| Nup153 | 45.6794 | 45.8008 | 0.00382823  | 0.9796   | 0.988479    | no  |
| Nup155 | 5.94901 | 5.3887  | -0.142713   | 0.36215  | 0.520374    | no  |
| Nup160 | 8.27152 | 7.78092 | -0.0882112  | 0.5645   | 0.71016     | no  |
| Nup188 | 16.4453 | 16.3414 | -0.0091463  | 0.9507   | 0.973541    | no  |
| Nup205 | 12.4009 | 11.9595 | -0.0522876  | 0.7164   | 0.827374    | no  |
| Nup210 | 100.422 | 96.0002 | -0.0649613  | 0.65065  | 0.779843    | no  |
| Nup214 | 13.4537 | 12.9552 | -0.0544679  | 0.7036   | 0.818403    | no  |
| Nup35  | 8.81613 | 8.28321 | -0.0899566  | 0.5939   | 0.734848    | no  |
| Nup37  | 14.0344 | 13.1372 | -0.0953149  | 0.60115  | 0.740754    | no  |
| Nup43  | 6.9505  | 5.92761 | -0.229666   | 0.29785  | 0.449802    | no  |
| Nup50  | 37.1052 | 29.5382 | -0.329043   | 0.0203   | 0.050517    | no  |
| Nup54  | 19.3886 | 17.5793 | -0.141327   | 0.35655  | 0.514316    | no  |
| Nup62  | 31.5555 | 25.1602 | -0.326752   | 0.10375  | 0.199202    | no  |
| Nup85  | 25.9014 | 24.5378 | -0.0780237  | 0.6042   | 0.743072    | no  |
| Nup88  | 39.8317 | 36.1469 | -0.140047   | 0.42865  | 0.586894    | no  |
| Nup93  | 21.4185 | 18.5796 | -0.205139   | 0.1779   | 0.306377    | no  |
| Nup98  | 15.2796 | 15.4271 | 0.0138552   | 0.93125  | 0.962491    | no  |
| Nupl1  | 27.1135 | 28.7816 | 0.0861318   | 0.55925  | 0.705908    | no  |
| Nupl2  | 2.59319 | 3.11226 | 0.263234    | 0.21665  | 0.35733     | no  |
| Nus1   | 20.7285 | 21.2194 | 0.033769    | 0.8113   | 0.890853    | no  |
| Nusap1 | 23.9552 | 13.0563 | -0.875594   | 5.00E-05 | 0.000236281 | yes |
| Nutf2  | 1.6977  | 2.02265 | 0.252662    | 0.68295  | 0.803802    | no  |
| Nvl    | 28.4847 | 33.9008 | 0.251133    | 0.0807   | 0.161767    | no  |
| Nxf1   | 95.0321 | 97.5483 | 0.0377008   | 0.7962   | 0.88132     | no  |
| Nxn    | 9.06139 | 8.69686 | -0.0592375  | 0.72225  | 0.831409    | no  |
| Nxn11  | 0.38733 | 1.19029 | 1.61968     | 3.00E-04 | 0.00122185  | yes |
| Nxpe3  | 10.3882 | 10.6968 | 0.0422226   | 0.77635  | 0.868226    | no  |
| Nxt1   | 36.0516 | 26.3226 | -0.45376    | 0.0066   | 0.0190676   | yes |
| Nxt2   | 2.10482 | 1.58457 | -0.409601   | 0.107    | 0.20432     | no  |
| Nyap1  | 3.59202 | 2.60116 | -0.465639   | 0.02015  | 0.0501845   | no  |
| Oard1  | 41.7615 | 37.7657 | -0.145098   | 0.3636   | 0.521852    | no  |
| Oas1a  | 4.37701 | 3.14895 | -0.475075   | 0.0374   | 0.0850194   | no  |
| Oas1b  | 9.53723 | 9.11373 | -0.0655273  | 0.71505  | 0.826464    | no  |
| Oas1c  | 10.3092 | 9.76642 | -0.0780288  | 0.6437   | 0.774472    | no  |
| Oas3   | 17.6944 | 18.0499 | 0.0286971   | 0.8448   | 0.911458    | no  |
| Oat    | 20.1173 | 16.2409 | -0.308804   | 0.04875  | 0.106446    | no  |
| Oaz1   | 232.663 | 203.806 | -0.191048   | 0.4465   | 0.604103    | no  |
| Oaz2   | 15.5617 | 14.7641 | -0.0759067  | 0.6475   | 0.777348    | no  |
| Obfc1  | 18.3123 | 17.8051 | -0.0405165  | 0.8057   | 0.887327    | no  |
| Ocel1  | 11.7281 | 10.0217 | -0.226839   | 0.20425  | 0.341531    | no  |
| Ociad1 | 141.068 | 148.868 | 0.0776467   | 0.58835  | 0.730259    | no  |
| Ocr1   | 1.90664 | 2.09952 | 0.139028    | 0.4801   | 0.635815    | no  |
| Odc1   | 80.743  | 85.0275 | 0.0745926   | 0.60335  | 0.742402    | no  |
| Odf2   | 39.3241 | 36.8718 | -0.0928954  | 0.5266   | 0.677923    | no  |
| Odf2l  | 3.15324 | 2.73799 | -0.203721   | 0.3683   | 0.526883    | no  |
| Ofd1   | 7.0686  | 7.29994 | 0.0464606   | 0.7743   | 0.866867    | no  |
| Ogdh   | 50.7673 | 53.9464 | 0.0876272   | 0.54155  | 0.690806    | no  |
| Ogfod1 | 8.34257 | 8.25207 | -0.0157358  | 0.9146   | 0.953169    | no  |
| Ogfod2 | 14.2766 | 14.1887 | -0.00890808 | 0.95575  | 0.976347    | no  |
| Ogfod3 | 1.01551 | 1.08269 | 0.0924163   | 0.93315  | 0.963496    | no  |
| Ogfr   | 60.1148 | 61.0572 | 0.0224397   | 0.87565  | 0.930296    | no  |
| Ogg1   | 7.61522 | 6.90808 | -0.1406     | 0.4861   | 0.641355    | no  |
| Ogt    | 75.6535 | 78.9889 | 0.0622426   | 0.6579   | 0.785372    | no  |

|         |         |         |             |          |             |     |
|---------|---------|---------|-------------|----------|-------------|-----|
| Oip5    | 3.34908 | 1.81197 | -0.886202   | 0.1678   | 0.292509    | no  |
| Ola1    | 47.5639 | 45.2201 | -0.0729021  | 0.65505  | 0.783215    | no  |
| Olfr613 | 7.76431 | 7.05699 | -0.137804   | 0.37655  | 0.535376    | no  |
| Olfr99  | 1.61849 | 1.48198 | -0.127129   | 0.7681   | 0.86258     | no  |
| Oma1    | 15.7138 | 16.5767 | 0.0771318   | 0.6415   | 0.772721    | no  |
| Omd     | 2.72719 | 3.042   | 0.157603    | 0.64015  | 0.771569    | no  |
| Opa1    | 14.6338 | 14.1762 | -0.0458306  | 0.74875  | 0.849774    | no  |
| Opa3    | 10.3661 | 8.66844 | -0.258027   | 0.1377   | 0.249978    | no  |
| Oplah   | 2.65818 | 2.05186 | -0.373509   | 0.1478   | 0.263981    | no  |
| Orai1   | 13.6582 | 13.9722 | 0.0327863   | 0.84175  | 0.909559    | no  |
| Orai2   | 75.6975 | 81.6996 | 0.110083    | 0.4358   | 0.593907    | no  |
| Orai3   | 14.703  | 17.0052 | 0.209865    | 0.1951   | 0.32966     | no  |
| Oraov1  | 14.6081 | 13.0039 | -0.167828   | 0.31105  | 0.464646    | no  |
| Orc1    | 1.76376 | 0.80786 | -1.12647    | 0.00035  | 0.0014053   | yes |
| Orc2    | 10.962  | 11.5595 | 0.0765714   | 0.61565  | 0.752538    | no  |
| Orc3    | 11.0609 | 10.9224 | -0.0181737  | 0.92105  | 0.957064    | no  |
| Orc4    | 15.393  | 14.2356 | -0.112776   | 0.52195  | 0.67399     | no  |
| Orc5    | 21.5364 | 19.9778 | -0.108378   | 0.4841   | 0.639589    | no  |
| Orc6    | 19.4903 | 14.4806 | -0.428642   | 0.00875  | 0.0243973   | yes |
| Ormdl1  | 33.2962 | 30.1779 | -0.141866   | 0.3476   | 0.504738    | no  |
| Ormdl2  | 24.4585 | 22.4002 | -0.126823   | 0.63455  | 0.767414    | no  |
| Ormdl3  | 18.0293 | 17.1641 | -0.0709556  | 0.6546   | 0.782916    | no  |
| Os9     | 81.0808 | 81.768  | 0.0121769   | 0.9347   | 0.964461    | no  |
| Osbp    | 22.2993 | 21.5103 | -0.0519716  | 0.71765  | 0.828153    | no  |
| Osbp11  | 11.5606 | 11.2303 | -0.04182    | 0.7819   | 0.871904    | no  |
| Osbp12  | 11.8762 | 11.1681 | -0.0886869  | 0.5856   | 0.727883    | no  |
| Osbp13  | 32.4969 | 21.1842 | -0.617313   | 5.00E-05 | 0.000236281 | yes |
| Osbp15  | 30.9644 | 36.8147 | 0.24967     | 0.07975  | 0.160153    | no  |
| Osbp17  | 15.4774 | 16.2901 | 0.0738257   | 0.62115  | 0.756758    | no  |
| Osbp18  | 19.4626 | 17.4349 | -0.158724   | 0.2568   | 0.401868    | no  |
| Osbp19  | 54.3776 | 51.1778 | -0.0874938  | 0.6679   | 0.792797    | no  |
| Oser1   | 53.8409 | 50.7921 | -0.0840982  | 0.5645   | 0.71016     | no  |
| Osgep   | 21.2592 | 25.2134 | 0.246102    | 0.12105  | 0.225762    | no  |
| Osgepl1 | 4.25147 | 3.98636 | -0.0928895  | 0.6747   | 0.79771     | no  |
| Osgin2  | 8.88471 | 9.32749 | 0.0701628   | 0.66795  | 0.792797    | no  |
| Osm     | 6.11123 | 6.90609 | 0.176406    | 0.36685  | 0.525266    | no  |
| Ost4    | 203.823 | 191.542 | -0.0896526  | 0.5838   | 0.72649     | no  |
| Ostc    | 116.351 | 115.207 | -0.0142559  | 0.92     | 0.956396    | no  |
| Ostf1   | 253.781 | 242.326 | -0.0666315  | 0.639    | 0.770756    | no  |
| Ostm1   | 32.9791 | 27.9039 | -0.241085   | 0.0953   | 0.185799    | no  |
| Otub1   | 51.0645 | 47.8653 | -0.0933422  | 0.525    | 0.676591    | no  |
| Otub2   | 1.33746 | 1.55039 | 0.21313     | 0.41455  | 0.57335     | no  |
| Otud1   | 7.75934 | 8.09719 | 0.0614882   | 0.72665  | 0.834446    | no  |
| Otud3   | 7.69622 | 7.72429 | 0.00525213  | 0.9768   | 0.987093    | no  |
| Otud4   | 28.2256 | 28.938  | 0.0359598   | 0.80065  | 0.884125    | no  |
| Otud5   | 57.3835 | 57.7968 | 0.0103534   | 0.94085  | 0.967977    | no  |
| Otud6b  | 9.8921  | 9.52678 | -0.0542874  | 0.73705  | 0.841815    | no  |
| Otud7b  | 6.1527  | 5.62289 | -0.129909   | 0.39135  | 0.550431    | no  |
| Ovca2   | 10.7808 | 10.0587 | -0.100015   | 0.61415  | 0.751212    | no  |
| Oxa1l   | 30.8431 | 28.3027 | -0.124005   | 0.39525  | 0.55438     | no  |
| Oxct1   | 25.4852 | 27.4509 | 0.107198    | 0.45225  | 0.609756    | no  |
| Oxld1   | 6.20318 | 4.83571 | -0.359279   | 0.2001   | 0.336209    | no  |
| Oxnad1  | 6.5757  | 6.65803 | 0.0179503   | 0.92095  | 0.957003    | no  |
| Oxr1    | 17.0075 | 17.2683 | 0.0219558   | 0.8837   | 0.934961    | no  |
| Oxsm    | 5.40753 | 5.55878 | 0.0397969   | 0.90885  | 0.949752    | no  |
| Oxsr1   | 16.3988 | 16.3382 | -0.00534513 | 0.97185  | 0.984473    | no  |
| P2rx4   | 1.07151 | 1.36766 | 0.352064    | 0.27865  | 0.428098    | no  |

|          |          |          |             |         |            |     |
|----------|----------|----------|-------------|---------|------------|-----|
| P2ry10   | 33.1194  | 41.1953  | 0.314802    | 0.03015 | 0.0708499  | no  |
| P2ry12   | 5.21555  | 2.59186  | -1.00883    | 0.1072  | 0.204624   | no  |
| P2ry14   | 4.14475  | 4.28447  | 0.0478307   | 0.94715 | 0.971428   | no  |
| P4ha1    | 9.56252  | 8.65459  | -0.143926   | 0.35165 | 0.509017   | no  |
| P4hb     | 119.312  | 117.423  | -0.0230308  | 0.87265 | 0.928534   | no  |
| P4htm    | 2.59621  | 3.28159  | 0.337989    | 0.17245 | 0.298872   | no  |
| Pa2g4    | 55.6003  | 52.3048  | -0.0881492  | 0.5381  | 0.687959   | no  |
| Pabpc1   | 672.226  | 586.585  | -0.196606   | 0.2206  | 0.361951   | no  |
| Pabpc4   | 25.6577  | 27.0973  | 0.0787534   | 0.5956  | 0.736112   | no  |
| Pabpn1   | 91.4618  | 91.5037  | 0.000660614 | 0.9952  | 0.996768   | no  |
| Pacrgl   | 4.83562  | 4.946    | 0.0325614   | 0.88535 | 0.935946   | no  |
| Pacs1    | 50.6053  | 51.3114  | 0.0199919   | 0.889   | 0.937844   | no  |
| Pacs2    | 17.8091  | 20.4     | 0.195957    | 0.1713  | 0.297339   | no  |
| Pacsin1  | 1.3023   | 1.26112  | -0.0463599  | 0.84595 | 0.911947   | no  |
| Pacsin2  | 25.5957  | 23.8469  | -0.102101   | 0.48495 | 0.640268   | no  |
| Padi2    | 40.3833  | 37.9338  | -0.0902736  | 0.5306  | 0.681469   | no  |
| Paf1     | 42.2012  | 43.1538  | 0.032203    | 0.82375 | 0.898541   | no  |
| Pafah1b1 | 56.7044  | 53.6705  | -0.0793318  | 0.5776  | 0.721101   | no  |
| Pafah1b2 | 19.2321  | 18.6876  | -0.0414351  | 0.78105 | 0.871246   | no  |
| Pafah1b3 | 7.02671  | 7.9364   | 0.175635    | 0.47375 | 0.630149   | no  |
| Pag1     | 21.4601  | 25.5223  | 0.2501      | 0.0752  | 0.152509   | no  |
| Pagr1a   | 48.6868  | 47.6869  | -0.0299378  | 0.84125 | 0.909214   | no  |
| Paics    | 65.8894  | 62.0236  | -0.087231   | 0.5766  | 0.720362   | no  |
| Paip1    | 9.09396  | 8.92167  | -0.0275946  | 0.8582  | 0.919829   | no  |
| Paip2    | 129.502  | 128.901  | -0.00671779 | 0.9634  | 0.980274   | no  |
| Paip2b   | 14.4091  | 14.6479  | 0.0237089   | 0.87605 | 0.930497   | no  |
| Pak1ip1  | 45.5593  | 44.5036  | -0.0338219  | 0.81855 | 0.895291   | no  |
| Pak2     | 63.7338  | 65.1768  | 0.0322996   | 0.81975 | 0.896145   | no  |
| Pak4     | 3.77926  | 3.70406  | -0.0289966  | 0.888   | 0.937209   | no  |
| Pak6     | 1.31519  | 1.59583  | 0.279037    | 0.249   | 0.394375   | no  |
| Palb2    | 2.14319  | 1.51206  | -0.503249   | 0.03475 | 0.0798699  | no  |
| Pald1    | 2.76107  | 2.49148  | -0.148224   | 0.44525 | 0.602932   | no  |
| Palm     | 16.9213  | 23.4707  | 0.472025    | 0.0024  | 0.00784462 | yes |
| Palm3    | 4.41521  | 5.29681  | 0.262642    | 0.70945 | 0.822649   | no  |
| Pam16    | 42.964   | 42.1001  | -0.0293064  | 0.87635 | 0.930717   | no  |
| Pan2     | 15.9455  | 15.6256  | -0.0292377  | 0.8444  | 0.911306   | no  |
| Pan3     | 32.7924  | 34.7234  | 0.0825463   | 0.5614  | 0.707547   | no  |
| Pank2    | 20.249   | 18.5193  | -0.128821   | 0.39725 | 0.556368   | no  |
| Pank3    | 8.88673  | 9.44527  | 0.0879386   | 0.5529  | 0.700474   | no  |
| Pank4    | 17.3731  | 18.4505  | 0.0868105   | 0.5775  | 0.721078   | no  |
| Panx1    | 46.1489  | 47.8219  | 0.0513757   | 0.72195 | 0.831132   | no  |
| Paox     | 8.2999   | 8.47143  | 0.029512    | 0.8751  | 0.929879   | no  |
| Papd4    | 37.5468  | 33.8918  | -0.147756   | 0.32215 | 0.477068   | no  |
| Papd5    | 24.4425  | 22.9122  | -0.093273   | 0.5196  | 0.671705   | no  |
| Papd7    | 6.5822   | 5.89164  | -0.159899   | 0.331   | 0.486681   | no  |
| Papola   | 64.083   | 62.9404  | -0.0259546  | 0.85285 | 0.91646    | no  |
| Papolg   | 12.2705  | 12.4424  | 0.0200745   | 0.89355 | 0.940507   | no  |
| Papss1   | 13.3009  | 13.0385  | -0.0287531  | 0.85715 | 0.919206   | no  |
| Paqr4    | 9.29349  | 9.51638  | 0.0341926   | 0.8849  | 0.935616   | no  |
| Paqr7    | 11.1184  | 10.1409  | -0.132758   | 0.38995 | 0.549063   | no  |
| Pard6a   | 6.97033  | 5.24837  | -0.409358   | 0.0726  | 0.14825    | no  |
| Pard6b   | 0.734078 | 1.01785  | 0.471525    | 0.1157  | 0.217763   | no  |
| Parg     | 20.6795  | 20.3303  | -0.0245679  | 0.8649  | 0.923867   | no  |
| Park7    | 172.401  | 161.899  | -0.0906747  | 0.52845 | 0.679635   | no  |
| Parl     | 32.8326  | 32.6696  | -0.0071782  | 0.96615 | 0.981559   | no  |
| Parm1    | 1.39422  | 0.353509 | -1.97964    | 0.00025 | 0.00103712 | yes |
| Parn     | 15.8583  | 16.2574  | 0.0358562   | 0.8127  | 0.891697   | no  |

|         |         |          |             |          |             |     |
|---------|---------|----------|-------------|----------|-------------|-----|
| Parp1   | 33.4023 | 33.5023  | 0.00431343  | 0.97635  | 0.986921    | no  |
| Parp10  | 32.0968 | 32.5204  | 0.0189147   | 0.89295  | 0.9401      | no  |
| Parp11  | 4.8399  | 4.64216  | -0.0601809  | 0.7267   | 0.834477    | no  |
| Parp12  | 2.29229 | 2.61196  | 0.188338    | 0.3817   | 0.540759    | no  |
| Parp14  | 25.1629 | 23.5697  | -0.0943639  | 0.50555  | 0.659521    | no  |
| Parp16  | 3.88212 | 3.89881  | 0.00618894  | 0.97385  | 0.985692    | no  |
| Parp2   | 25.7678 | 26.3786  | 0.0338011   | 0.8309   | 0.902978    | no  |
| Parp3   | 24.0979 | 25.2142  | 0.0653245   | 0.65975  | 0.786848    | no  |
| Parp4   | 21.9593 | 23.3274  | 0.087192    | 0.5399   | 0.689474    | no  |
| Parp6   | 15.2516 | 18.4823  | 0.277179    | 0.07365  | 0.149869    | no  |
| Parp8   | 13.2871 | 21.4292  | 0.689548    | 5.00E-05 | 0.000236281 | yes |
| Parp9   | 25.4778 | 25.3773  | -0.00570336 | 0.9788   | 0.98811     | no  |
| Parppb  | 4.39498 | 2.18253  | -1.00986    | 5.00E-05 | 0.000236281 | yes |
| Pars2   | 2.19162 | 1.94437  | -0.172693   | 0.49615  | 0.650722    | no  |
| Parvg   | 71.3595 | 79.9163  | 0.163384    | 0.24775  | 0.392977    | no  |
| Pask    | 1.60234 | 0.832801 | -0.944134   | 1.00E-04 | 0.000450026 | yes |
| Patl1   | 18.5963 | 17.7754  | -0.0651334  | 0.65445  | 0.782802    | no  |
| Patz1   | 10.9833 | 12.8861  | 0.230506    | 0.1429   | 0.256933    | no  |
| Paxbp1  | 24.264  | 24.0504  | -0.012759   | 0.9499   | 0.973004    | no  |
| Paxip1  | 13.5535 | 12.3657  | -0.132322   | 0.3691   | 0.527707    | no  |
| Pbdc1   | 13.6047 | 12.3248  | -0.142549   | 0.4164   | 0.575018    | no  |
| Pbk     | 8.43719 | 4.04528  | -1.06052    | 5.00E-05 | 0.000236281 | yes |
| Pbrm1   | 26.4667 | 25.5765  | -0.0493561  | 0.72495  | 0.833185    | no  |
| Pbx2    | 18.7761 | 16.4307  | -0.1925     | 0.2038   | 0.340948    | no  |
| Pbx4    | 1.83469 | 1.81945  | -0.0120337  | 0.97635  | 0.986921    | no  |
| Pbxip1  | 55.2382 | 69.8461  | 0.338513    | 0.01665  | 0.0425054   | yes |
| Pcbd2   | 49.8263 | 41.1387  | -0.27641    | 0.1292   | 0.23782     | no  |
| Pcbp1   | 141.569 | 137.668  | -0.0403132  | 0.7748   | 0.867207    | no  |
| Pcbp2   | 137.773 | 128.941  | -0.0955817  | 0.5383   | 0.688066    | no  |
| Pcbp4   | 7.16245 | 6.87981  | -0.0580837  | 0.75535  | 0.853982    | no  |
| Pcca    | 5.33    | 6.85289  | 0.362576    | 0.0452   | 0.0998906   | no  |
| Pccb    | 7.60027 | 10.7839  | 0.504761    | 0.0044   | 0.0133909   | yes |
| Pcdhgc3 | 6.46285 | 5.97638  | -0.112899   | 0.6398   | 0.771331    | no  |
| Pcdhgc4 | 1.43339 | 0.584887 | -1.2932     | 0.0622   | 0.130614    | no  |
| Pced1a  | 12.4122 | 12.4674  | 0.00640969  | 0.98265  | 0.990014    | no  |
| Pced1b  | 42.4495 | 35.3832  | -0.262685   | 0.0726   | 0.14825     | no  |
| Pcf11   | 32.3324 | 34.3217  | 0.0861399   | 0.54115  | 0.690446    | no  |
| Pcgf1   | 20.4792 | 20.9109  | 0.0300954   | 0.87055  | 0.927138    | no  |
| Pcgf2   | 5.21669 | 5.6779   | 0.122223    | 0.5192   | 0.671446    | no  |
| Pcgf3   | 5.4811  | 5.71357  | 0.0599253   | 0.7291   | 0.835927    | no  |
| Pcgf5   | 11.1342 | 11.9258  | 0.0990938   | 0.58555  | 0.727859    | no  |
| Pcgf6   | 7.50647 | 7.88097  | 0.0702399   | 0.7033   | 0.818216    | no  |
| Pcid2   | 16.9917 | 18.4797  | 0.121107    | 0.4382   | 0.596188    | no  |
| Pcif1   | 40.9479 | 38.7767  | -0.0785981  | 0.58875  | 0.730589    | no  |
| Pck2    | 1.51919 | 1.4573   | -0.0600085  | 0.81135  | 0.890853    | no  |
| Pcm1    | 10.415  | 11.4083  | 0.131415    | 0.36015  | 0.518175    | no  |
| Pcmt1   | 29.6932 | 29.5114  | -0.00885695 | 0.9518   | 0.974159    | no  |
| Pcmtd1  | 14.7422 | 16.5369  | 0.165734    | 0.2517   | 0.396819    | no  |
| Pcmtd2  | 27.4589 | 27.5612  | 0.00536474  | 0.9718   | 0.98445     | no  |
| Pcna    | 272.973 | 214.446  | -0.348143   | 0.01335  | 0.0351488   | yes |
| Pcnp    | 74.6246 | 66.7285  | -0.161348   | 0.2541   | 0.398677    | no  |
| Pcnt    | 11.9793 | 11.5247  | -0.0558198  | 0.69765  | 0.814489    | no  |
| Pcnx    | 2.50791 | 2.81083  | 0.164511    | 0.3028   | 0.455445    | no  |
| Pcnxl3  | 27.8452 | 28.145   | 0.0154511   | 0.91225  | 0.9519      | no  |
| Pcnxl4  | 1.72873 | 2.12602  | 0.298442    | 0.15525  | 0.274798    | no  |
| Pcsk7   | 24.2168 | 24.0783  | -0.00827171 | 0.9607   | 0.978896    | no  |
| Pcyox1  | 2.28284 | 2.56111  | 0.165938    | 0.40235  | 0.561294    | no  |

|         |         |         |            |          |             |     |
|---------|---------|---------|------------|----------|-------------|-----|
| Pcyox1l | 3.48398 | 3.90506 | 0.164608   | 0.46355  | 0.620617    | no  |
| Pcyt1a  | 7.45294 | 6.7968  | -0.132953  | 0.4015   | 0.560496    | no  |
| Pcyt2   | 26.5563 | 29.2902 | 0.14136    | 0.35345  | 0.511056    | no  |
| Pdap1   | 42.105  | 40.0457 | -0.0723453 | 0.6185   | 0.754728    | no  |
| Pdcd1   | 10.429  | 14.5563 | 0.481043   | 0.0057   | 0.016787    | yes |
| Pdcd10  | 70.6815 | 62.7253 | -0.172286  | 0.2276   | 0.370516    | no  |
| Pdcd11  | 11.7038 | 13.6172 | 0.218455   | 0.137    | 0.249239    | no  |
| Pdcd2   | 36.8463 | 38.1892 | 0.0516457  | 0.7395   | 0.843398    | no  |
| Pdcd2l  | 13.0539 | 12.4193 | -0.0718973 | 0.6941   | 0.811888    | no  |
| Pdcd4   | 155.246 | 145.897 | -0.0896033 | 0.59625  | 0.736683    | no  |
| Pdcd5   | 86.5342 | 82.3183 | -0.0720585 | 0.64265  | 0.773631    | no  |
| Pdcd6   | 68.6927 | 69.9226 | 0.0256014  | 0.8594   | 0.920318    | no  |
| Pdcd6ip | 79.4532 | 82.0016 | 0.0455467  | 0.7528   | 0.852246    | no  |
| Pdcd7   | 12.1023 | 11.3393 | -0.0939615 | 0.5728   | 0.717062    | no  |
| Pdcl    | 14.6146 | 13.0666 | -0.16153   | 0.2992   | 0.451348    | no  |
| Pdcl3   | 33.5277 | 31.5142 | -0.0893546 | 0.56125  | 0.707421    | no  |
| Pddc1   | 36.3374 | 35.9393 | -0.0158939 | 0.9155   | 0.953642    | no  |
| Pde12   | 13.3947 | 13.0853 | -0.0337221 | 0.82515  | 0.899457    | no  |
| Pde1b   | 12.1016 | 9.13677 | -0.405444  | 0.0121   | 0.0323073   | yes |
| Pde2a   | 29.7944 | 17.6464 | -0.755672  | 5.00E-05 | 0.000236281 | yes |
| Pde3b   | 25.3655 | 24.8806 | -0.0278456 | 0.8505   | 0.914715    | no  |
| Pde4a   | 2.78021 | 2.19736 | -0.339427  | 0.0849   | 0.168834    | no  |
| Pde4b   | 21.5923 | 24.285  | 0.169549   | 0.2488   | 0.394182    | no  |
| Pde4d   | 5.45234 | 5.96178 | 0.128867   | 0.3982   | 0.557234    | no  |
| Pde4dip | 9.08975 | 10.5258 | 0.211611   | 0.1526   | 0.271025    | no  |
| Pde6d   | 19.07   | 16.5398 | -0.205366  | 0.25495  | 0.399673    | no  |
| Pde7a   | 41.5124 | 42.2709 | 0.0261238  | 0.8552   | 0.917923    | no  |
| Pde8a   | 4.90989 | 4.31024 | -0.187922  | 0.32785  | 0.483419    | no  |
| Pdf     | 15.3523 | 12.5806 | -0.287254  | 0.10185  | 0.196206    | no  |
| Pdgb    | 6.08717 | 4.048   | -0.588561  | 0.0019   | 0.00637506  | yes |
| Pdha1   | 55.3042 | 53.8802 | -0.0376324 | 0.8005   | 0.884028    | no  |
| Pdha2   | 71.8743 | 66.137  | -0.120019  | 0.40555  | 0.564553    | no  |
| Pdhx    | 6.7351  | 6.81798 | 0.0176453  | 0.92225  | 0.957832    | no  |
| Pdia3   | 202.9   | 237.597 | 0.227747   | 0.1139   | 0.214949    | no  |
| Pdia4   | 51.2994 | 54.5515 | 0.0886764  | 0.52715  | 0.678445    | no  |
| Pdia6   | 61.3268 | 68.8149 | 0.166204   | 0.24505  | 0.390123    | no  |
| Pdik1l  | 4.42694 | 4.17559 | -0.0843318 | 0.6188   | 0.754963    | no  |
| Pdk1    | 6.06158 | 4.89853 | -0.307346  | 0.05655  | 0.120762    | no  |
| Pdk2    | 1.8049  | 2.15082 | 0.252971   | 0.332    | 0.487664    | no  |
| Pdk3    | 20.5412 | 17.7647 | -0.20951   | 0.182    | 0.312105    | no  |
| Pdlim1  | 70.719  | 83.9609 | 0.247619   | 0.087    | 0.172315    | no  |
| Pdlim2  | 65.3304 | 60.2458 | -0.116895  | 0.4193   | 0.577825    | no  |
| Pdlim5  | 17.2941 | 18.1846 | 0.0724369  | 0.63505  | 0.767782    | no  |
| Pdlim7  | 5.81398 | 6.07539 | 0.0634511  | 0.7786   | 0.869667    | no  |
| Pdp1    | 2.35763 | 2.19185 | -0.10519   | 0.59985  | 0.739681    | no  |
| Pdp2    | 2.96621 | 2.98393 | 0.00859387 | 0.9627   | 0.980023    | no  |
| Pdpk1   | 23.2396 | 22.8964 | -0.0214651 | 0.87985  | 0.932638    | no  |
| Pdpr    | 8.91585 | 9.23902 | 0.0513672  | 0.76815  | 0.862623    | no  |
| Pdrg1   | 64.1764 | 66.4096 | 0.04935    | 0.7298   | 0.836444    | no  |
| Pds5a   | 49.9109 | 50.0737 | 0.00469849 | 0.9746   | 0.986135    | no  |
| Pds5b   | 13.7436 | 13.1839 | -0.0599876 | 0.67435  | 0.797483    | no  |
| Pdss1   | 4.31939 | 2.89561 | -0.576962  | 0.61025  | 0.74788     | no  |
| Pdss2   | 2.83214 | 2.97618 | 0.0715677  | 0.7794   | 0.870285    | no  |
| Pdxc1   | 11.433  | 11.6727 | 0.0299266  | 0.901    | 0.945163    | no  |
| Pdxk    | 4.90415 | 5.81335 | 0.245366   | 0.1344   | 0.245503    | no  |
| Pdyp    | 11.5811 | 11.2424 | -0.0428212 | 0.79855  | 0.882786    | no  |
| Pdzd11  | 25.494  | 25.2351 | -0.0147229 | 0.932    | 0.962815    | no  |

|         |         |         |              |          |             |     |
|---------|---------|---------|--------------|----------|-------------|-----|
| Pdzd8   | 10.5613 | 13.8627 | 0.392424     | 0.00645  | 0.0186894   | yes |
| Pdzk1   | 2.61276 | 2.44142 | -0.0978557   | 0.666    | 0.79138     | no  |
| Pea15a  | 63.0064 | 59.0481 | -0.0936082   | 0.51155  | 0.664695    | no  |
| Peak1   | 19.9088 | 16.8811 | -0.237993    | 0.08865  | 0.175058    | no  |
| Pear1   | 13.0321 | 14.8928 | 0.192547     | 0.20115  | 0.337523    | no  |
| Pebp1   | 92.3745 | 119.124 | 0.366898     | 0.01085  | 0.0294352   | yes |
| Pecam1  | 10.8123 | 19.9989 | 0.887247     | 5.00E-05 | 0.000236281 | yes |
| Pef1    | 27.8324 | 27.8563 | 0.00123856   | 0.9915   | 0.994869    | no  |
| Peli1   | 37.2487 | 39.4171 | 0.0816319    | 0.5703   | 0.714921    | no  |
| Pelo    | 18.3171 | 19.9426 | 0.122664     | 0.6926   | 0.810886    | no  |
| Pelp1   | 9.53896 | 10.2418 | 0.10256      | 0.51935  | 0.671554    | no  |
| Peo1    | 3.84278 | 4.87344 | 0.342789     | 0.06295  | 0.131918    | no  |
| Pepd    | 29.4778 | 27.8713 | -0.0808495   | 0.6008   | 0.740426    | no  |
| Per1    | 10.2807 | 11.1582 | 0.118163     | 0.4311   | 0.58938     | no  |
| Perp    | 2.77031 | 1.98981 | -0.477411    | 0.07185  | 0.146982    | no  |
| Pes1    | 26.2402 | 29.0238 | 0.145457     | 0.3136   | 0.467328    | no  |
| Pet100  | 16.7963 | 15.4374 | -0.121715    | 0.4968   | 0.651333    | no  |
| Pet112  | 3.92159 | 3.70936 | -0.0802711   | 0.70615  | 0.820368    | no  |
| Pet117  | 6.65217 | 8.77726 | 0.399945     | 0.7604   | 0.857521    | no  |
| Pex1    | 2.78971 | 3.13569 | 0.168668     | 0.5115   | 0.664679    | no  |
| Pex10   | 3.08902 | 3.36946 | 0.125369     | 0.61315  | 0.75034     | no  |
| Pex11b  | 18.9322 | 21.9051 | 0.210419     | 0.2835   | 0.433605    | no  |
| Pex11g  | 2.20398 | 3.08294 | 0.484195     | 0.12385  | 0.229896    | no  |
| Pex12   | 3.96292 | 4.20614 | 0.0859332    | 0.6868   | 0.806665    | no  |
| Pex13   | 6.1708  | 5.74066 | -0.104242    | 0.6475   | 0.777348    | no  |
| Pex14   | 11.6629 | 11.1256 | -0.0680462   | 0.69185  | 0.810385    | no  |
| Pex16   | 19.3208 | 19.0921 | -0.0171787   | 0.92085  | 0.956941    | no  |
| Pex19   | 16.0975 | 16.1384 | 0.00366735   | 0.97995  | 0.988614    | no  |
| Pex2    | 15.7002 | 16.8134 | 0.0988286    | 0.5324   | 0.682923    | no  |
| Pex26   | 8.9739  | 15.0544 | 0.746381     | 5.00E-05 | 0.000236281 | yes |
| Pex3    | 6.36783 | 8.19077 | 0.363198     | 0.0851   | 0.169169    | no  |
| Pex5    | 19.1746 | 20.8342 | 0.119761     | 0.4197   | 0.578207    | no  |
| Pex6    | 17.8175 | 18.2094 | 0.0313862    | 0.831    | 0.903058    | no  |
| Pex7    | 11.2958 | 11.6833 | 0.0486634    | 0.7792   | 0.870158    | no  |
| Pfas    | 3.22634 | 3.07241 | -0.0705284   | 0.67955  | 0.801444    | no  |
| Pfdn1   | 42.6317 | 41.4561 | -0.0403416   | 0.79835  | 0.882662    | no  |
| Pfdn2   | 64.3706 | 69.118  | 0.102659     | 0.53465  | 0.685038    | no  |
| Pfdn4   | 23.7128 | 20.8891 | -0.182914    | 0.31525  | 0.469034    | no  |
| Pfdn5   | 418.742 | 403.19  | -0.0546006   | 0.699    | 0.815377    | no  |
| Pfkfb1  | 2.03867 | 2.26472 | 0.151706     | 0.58365  | 0.726393    | no  |
| Pfkfb2  | 3.83755 | 4.51324 | 0.233979     | 0.22105  | 0.362562    | no  |
| Pfkfb3  | 15.4805 | 17.0301 | 0.13763      | 0.3512   | 0.508543    | no  |
| Pfkl    | 11.2619 | 11.2588 | -0.000397636 | 0.99755  | 0.998087    | no  |
| Pfkm    | 2.26701 | 1.37428 | -0.722112    | 0.23205  | 0.375698    | no  |
| Pfkp    | 91.4322 | 72.9224 | -0.32634     | 0.0351   | 0.080572    | no  |
| Pfn1    | 2803.06 | 2595.03 | -0.11125     | 0.496    | 0.650622    | no  |
| Pgam1   | 81.8407 | 84.635  | 0.0484366    | 0.73285  | 0.838741    | no  |
| Pgam2   | 2.76973 | 3.28002 | 0.243959     | 0.45315  | 0.610677    | no  |
| Pgam5   | 27.382  | 26.4511 | -0.0499004   | 0.7408   | 0.844294    | no  |
| Pgap1   | 1.53964 | 1.91316 | 0.313366     | 0.0744   | 0.151143    | no  |
| Pgap2   | 17.2269 | 14.0778 | -0.291241    | 0.07805  | 0.157357    | no  |
| Pgap3   | 7.02589 | 9.16689 | 0.383752     | 0.0315   | 0.0735497   | no  |
| Pgd     | 37.3447 | 40.7173 | 0.124741     | 0.3926   | 0.551749    | no  |
| Pggt1b  | 8.36546 | 9.2734  | 0.148654     | 0.37405  | 0.53269     | no  |
| Pgk1    | 145.896 | 132.69  | -0.136885    | 0.33685  | 0.493054    | no  |
| Pgl5    | 75.821  | 84.1265 | 0.149964     | 0.32225  | 0.477176    | no  |
| Pglyrp1 | 170.648 | 190.503 | 0.158793     | 0.26775  | 0.415184    | no  |



|          |         |         |             |         |            |     |
|----------|---------|---------|-------------|---------|------------|-----|
| Pglyrp2  | 45.9795 | 49.338  | 0.101709    | 0.47515 | 0.631452   | no  |
| Pgm1     | 23.0248 | 24.4591 | 0.0871832   | 0.5672  | 0.712325   | no  |
| Pgm2     | 13.6026 | 14.8602 | 0.127574    | 0.4158  | 0.574527   | no  |
| Pgm2l1   | 9.53738 | 7.01038 | -0.444101   | 0.00235 | 0.00770045 | yes |
| Pgm3     | 4.92717 | 5.1358  | 0.0598298   | 0.8295  | 0.902081   | no  |
| Pgp      | 22.1507 | 19.6568 | -0.17232    | 0.33025 | 0.485923   | no  |
| Pgrmc1   | 42.9392 | 40.2029 | -0.0949953  | 0.5196  | 0.671705   | no  |
| Pgrmc2   | 11.195  | 11.1586 | -0.00469539 | 0.97835 | 0.987896   | no  |
| Pgs1     | 20.1487 | 22.1721 | 0.13806     | 0.3627  | 0.520941   | no  |
| Phactr4  | 6.32474 | 5.35978 | -0.238833   | 0.14345 | 0.257725   | no  |
| Phax     | 33.0763 | 28.9948 | -0.190004   | 0.237   | 0.381629   | no  |
| Phb      | 32.4544 | 35.5388 | 0.130979    | 0.3864  | 0.545458   | no  |
| Phb2     | 131.542 | 133.356 | 0.019764    | 0.8854  | 0.935946   | no  |
| Phc1     | 10.4499 | 8.53459 | -0.292092   | 0.06415 | 0.133829   | no  |
| Phc2     | 39.6687 | 41.3754 | 0.0607721   | 0.6726  | 0.796214   | no  |
| Phc3     | 14.0307 | 15.0076 | 0.0971075   | 0.49765 | 0.652059   | no  |
| Phf1     | 55.0079 | 52.2627 | -0.0738578  | 0.60655 | 0.744885   | no  |
| Phf10    | 17.2485 | 18.4333 | 0.0958439   | 0.68065 | 0.802218   | no  |
| Phf11a   | 28.1464 | 19.6374 | -0.519345   | 0.00135 | 0.00470245 | yes |
| Phf11b   | 107.547 | 90.8306 | -0.243722   | 0.09085 | 0.178643   | no  |
| Phf11c   | 19.0843 | 19.9696 | 0.0654157   | 0.688   | 0.80759    | no  |
| Phf12    | 31.6979 | 32.8015 | 0.0493773   | 0.73    | 0.836592   | no  |
| Phf13    | 17.5052 | 17.7581 | 0.0206968   | 0.8903  | 0.938598   | no  |
| Phf14    | 29.9617 | 29.5175 | -0.0215462  | 0.88205 | 0.934016   | no  |
| Phf19    | 4.76713 | 3.72132 | -0.357304   | 0.04785 | 0.104766   | no  |
| Phf2     | 24.7608 | 25.2571 | 0.028633    | 0.84235 | 0.909915   | no  |
| Phf20    | 7.04063 | 7.31853 | 0.0558482   | 0.72025 | 0.830041   | no  |
| Phf20l1  | 44.9984 | 40.5088 | -0.151638   | 0.2853  | 0.435584   | no  |
| Phf21a   | 26.3172 | 27.5834 | 0.0677926   | 0.6329  | 0.766127   | no  |
| Phf21b   | 5.9247  | 4.93205 | -0.264557   | 0.12755 | 0.235433   | no  |
| Phf23    | 33.1887 | 31.8136 | -0.0610485  | 0.6783  | 0.800478   | no  |
| Phf3     | 19.6046 | 21.0212 | 0.100655    | 0.47855 | 0.634525   | no  |
| Phf5a    | 42.8239 | 35.5447 | -0.268784   | 0.07225 | 0.147659   | no  |
| Phf6     | 13.6603 | 13.528  | -0.0140387  | 0.92425 | 0.958705   | no  |
| Phf7     | 6.91207 | 6.41034 | -0.108718   | 0.5691  | 0.713886   | no  |
| Phf8     | 15.8424 | 17.1191 | 0.111812    | 0.4465  | 0.604103   | no  |
| Phgdh    | 41.3354 | 39.8806 | -0.0516901  | 0.72245 | 0.831572   | no  |
| Phip     | 11.1513 | 12.0158 | 0.107724    | 0.4491  | 0.606517   | no  |
| Phka2    | 5.29048 | 4.68584 | -0.175088   | 0.30815 | 0.461398   | no  |
| Phkb     | 7.95932 | 8.7693  | 0.139817    | 0.364   | 0.522277   | no  |
| Phkg2    | 23.0914 | 23.0022 | -0.00558821 | 0.9779  | 0.987653   | no  |
| Phlda1   | 18.9768 | 21.2503 | 0.163246    | 0.29095 | 0.441925   | no  |
| Phldb3   | 5.70166 | 8.28685 | 0.539442    | 0.0038  | 0.0117554  | yes |
| Phlpp1   | 1.54565 | 1.68997 | 0.128783    | 0.52355 | 0.675351   | no  |
| Phlpp2   | 3.4708  | 3.47187 | 0.000445158 | 0.9958  | 0.997114   | no  |
| Phospho2 | 13.1572 | 14.1487 | 0.104822    | 0.5273  | 0.678601   | no  |
| Phpt1    | 34.5387 | 42.4771 | 0.298471    | 0.1045  | 0.200332   | no  |
| Phrf1    | 25.6521 | 25.8315 | 0.0100528   | 0.9436  | 0.969464   | no  |
| Phtf1    | 31.4964 | 30.1489 | -0.0630829  | 0.73695 | 0.841741   | no  |
| Phtf2    | 2.07019 | 2.49776 | 0.270873    | 0.16525 | 0.28907    | no  |
| Phyh     | 19.3098 | 21.5176 | 0.156183    | 0.33855 | 0.494937   | no  |
| Phyhd1   | 12.0005 | 12.6005 | 0.0703908   | 0.7055  | 0.819802   | no  |
| Phykpl   | 6.51762 | 5.17429 | -0.332984   | 0.69375 | 0.811681   | no  |
| Pi4k2a   | 12.5951 | 13.3589 | 0.0849433   | 0.57755 | 0.721101   | no  |
| Pi4k2b   | 2.05137 | 1.87494 | -0.129742   | 0.5793  | 0.722648   | no  |
| Pi4ka    | 28.7431 | 26.6429 | -0.109463   | 0.50425 | 0.658275   | no  |
| Pi4kb    | 23.6145 | 21.6947 | -0.122326   | 0.471   | 0.627496   | no  |

|         |         |         |              |          |             |     |
|---------|---------|---------|--------------|----------|-------------|-----|
| Pias1   | 13.1205 | 12.0025 | -0.128492    | 0.3911   | 0.550167    | no  |
| Pias2   | 11.3805 | 11.8254 | 0.0553212    | 0.76445  | 0.860206    | no  |
| Pias3   | 14.5338 | 14.5308 | -0.000302986 | 0.99815  | 0.998504    | no  |
| Pias4   | 21.2429 | 20.2193 | -0.0712459   | 0.65855  | 0.785895    | no  |
| Pibf1   | 4.77575 | 4.52888 | -0.0765747   | 0.76165  | 0.858232    | no  |
| Picalm  | 129.203 | 120.383 | -0.101997    | 0.4776   | 0.633694    | no  |
| Pick1   | 6.67633 | 8.98809 | 0.428959     | 0.0211   | 0.0522701   | no  |
| Piezo1  | 28.9434 | 29.18   | 0.0117482    | 0.9398   | 0.967432    | no  |
| Pif1    | 4.28061 | 2.85026 | -0.586721    | 0.0022   | 0.00725609  | yes |
| Piga    | 6.95636 | 7.60934 | 0.129438     | 0.4331   | 0.591335    | no  |
| Pigb    | 6.93659 | 6.64215 | -0.0625764   | 0.88815  | 0.937284    | no  |
| Pigc    | 7.25288 | 6.04015 | -0.263969    | 0.12085  | 0.225484    | no  |
| Pigf    | 12.031  | 15.3927 | 0.355482     | 0.1727   | 0.299232    | no  |
| Pigg    | 1.46043 | 1.50065 | 0.0391936    | 0.87405  | 0.929309    | no  |
| Pigh    | 7.86215 | 8.16022 | 0.0536838    | 0.76305  | 0.859247    | no  |
| Pigk    | 10.8515 | 10.7613 | -0.0120422   | 0.93435  | 0.964382    | no  |
| Pigl    | 11.496  | 10.4392 | -0.139113    | 0.42985  | 0.588138    | no  |
| Pigm    | 11.2604 | 10.9393 | -0.041738    | 0.7714   | 0.86491     | no  |
| Pign    | 4.24133 | 4.12781 | -0.03914     | 0.8043   | 0.886588    | no  |
| Pigo    | 13.0542 | 12.5561 | -0.0561269   | 0.70795  | 0.821648    | no  |
| Pigp    | 23.0393 | 24.6308 | 0.0963635    | 0.7631   | 0.859289    | no  |
| Pigq    | 24.3491 | 22.9962 | -0.082477    | 0.56255  | 0.708503    | no  |
| Pigs    | 48.342  | 48.3404 | -5.01E-05    | 0.999    | 0.999127    | no  |
| Pigt    | 54.4727 | 51.418  | -0.0832591   | 0.55775  | 0.704569    | no  |
| Pigu    | 15.953  | 16.1004 | 0.0132635    | 0.93685  | 0.965734    | no  |
| Pigv    | 11.8546 | 11.3825 | -0.058629    | 0.7228   | 0.831757    | no  |
| Pigw    | 1.95504 | 2.19105 | 0.164422     | 0.6829   | 0.803769    | no  |
| Pigx    | 40.5803 | 47.0852 | 0.214496     | 0.17775  | 0.306171    | no  |
| Pigyl   | 19.4939 | 18.6809 | -0.0614559   | 0.76265  | 0.858961    | no  |
| Pih1d1  | 40.2018 | 30.3207 | -0.406955    | 0.06235  | 0.13089     | no  |
| Pik3ap1 | 39.2051 | 26.7997 | -0.548821    | 0.00015  | 0.000653255 | yes |
| Pik3c2a | 4.47932 | 4.90075 | 0.129722     | 0.40395  | 0.562914    | no  |
| Pik3c3  | 25.737  | 23.2078 | -0.149234    | 0.3085   | 0.461765    | no  |
| Pik3ca  | 13.385  | 13.5054 | 0.0129169    | 0.9321   | 0.962876    | no  |
| Pik3cb  | 1.12196 | 1.08032 | -0.0545744   | 0.82125  | 0.897021    | no  |
| Pik3cd  | 175.744 | 192.655 | 0.132548     | 0.37105  | 0.529625    | no  |
| Pik3cg  | 20.9583 | 19.6698 | -0.0915351   | 0.5177   | 0.670194    | no  |
| Pik3ip1 | 19.3454 | 41.811  | 1.11189      | 5.00E-05 | 0.000236281 | yes |
| Pik3r1  | 33.6972 | 32.9423 | -0.0326842   | 0.81585  | 0.893487    | no  |
| Pik3r2  | 2.08945 | 2.64685 | 0.341154     | 0.12465  | 0.231114    | no  |
| Pik3r4  | 12.8187 | 13.7362 | 0.0997372    | 0.49505  | 0.649738    | no  |
| Pik3r5  | 99.6588 | 115.795 | 0.2165       | 0.13315  | 0.243673    | no  |
| Pikfyve | 3.39469 | 4.35642 | 0.359863     | 0.01985  | 0.0495212   | yes |
| Pim1    | 184.946 | 234.622 | 0.343235     | 0.0162   | 0.0415068   | yes |
| Pim2    | 38.9578 | 59.4826 | 0.610557     | 5.00E-05 | 0.000236281 | yes |
| Pim3    | 19.4427 | 19.9145 | 0.0345901    | 0.81865  | 0.895331    | no  |
| Pin1    | 9.22067 | 9.37097 | 0.0233268    | 0.87705  | 0.931124    | no  |
| Pin4    | 89.9469 | 97.2116 | 0.112055     | 0.5006   | 0.654746    | no  |
| Pink1   | 45.4567 | 38.9326 | -0.223517    | 0.1176   | 0.220627    | no  |
| Pinx1   | 10.9902 | 12.7007 | 0.208694     | 0.25945  | 0.405081    | no  |
| Pip4k2a | 35.191  | 39.3181 | 0.159988     | 0.26525  | 0.412131    | no  |
| Pip4k2b | 27.0913 | 29.2225 | 0.109251     | 0.4392   | 0.597226    | no  |
| Pip4k2c | 33.0839 | 32.111  | -0.043062    | 0.8127   | 0.891697    | no  |
| Pip5k1a | 22.904  | 23.9159 | 0.0623732    | 0.67605  | 0.798824    | no  |
| Pip5k1c | 32.6517 | 34.0638 | 0.0610809    | 0.66805  | 0.792889    | no  |
| Pisd    | 17.3748 | 17.9488 | 0.0468857    | 0.76735  | 0.862081    | no  |
| Pithd1  | 33.7313 | 35.2034 | 0.0616284    | 0.6845   | 0.805134    | no  |

|          |         |         |             |          |             |     |
|----------|---------|---------|-------------|----------|-------------|-----|
| Pitpna   | 68.3791 | 63.2813 | -0.111776   | 0.427    | 0.585407    | no  |
| Pitpnb   | 30.971  | 28.9083 | -0.0994301  | 0.49495  | 0.649619    | no  |
| Pitpnc1  | 44.6943 | 44.469  | -0.00728855 | 0.9608   | 0.978922    | no  |
| Pitpnm1  | 68.1967 | 71.4519 | 0.0672705   | 0.6996   | 0.815699    | no  |
| Pitpnm2  | 7.62176 | 7.20455 | -0.0812152  | 0.59375  | 0.734714    | no  |
| Pitrm1   | 13.8803 | 16.0832 | 0.212514    | 0.5695   | 0.71421     | no  |
| Pja1     | 18.0171 | 18.1512 | 0.0106974   | 0.94575  | 0.970556    | no  |
| Pja2     | 6.732   | 6.33499 | -0.0876923  | 0.5862   | 0.728359    | no  |
| Pkd1     | 9.37344 | 10.3832 | 0.147598    | 0.4222   | 0.58062     | no  |
| Pkd2l2   | 2.63896 | 2.82649 | 0.099044    | 0.8977   | 0.943244    | no  |
| Pkig     | 3.0267  | 3.28044 | 0.116145    | 0.69845  | 0.814978    | no  |
| Pkm      | 219.267 | 220.292 | 0.00672567  | 0.96225  | 0.979811    | no  |
| Pkmyt1   | 15.779  | 13.5116 | -0.223799   | 0.2815   | 0.43134     | no  |
| Pkn1     | 81.8649 | 89.973  | 0.136248    | 0.4175   | 0.576109    | no  |
| Pkn2     | 12.6076 | 13.1197 | 0.0574392   | 0.68185  | 0.803016    | no  |
| Pknox1   | 22.17   | 20.4773 | -0.114585   | 0.4212   | 0.579628    | no  |
| Pkp3     | 35.1482 | 43.1788 | 0.296873    | 0.0399   | 0.0898546   | no  |
| Pkp4     | 7.69205 | 8.36091 | 0.120292    | 0.44235  | 0.600226    | no  |
| Pla2g12a | 5.28315 | 5.50906 | 0.0604072   | 0.7786   | 0.869667    | no  |
| Pla2g15  | 3.47939 | 3.18811 | -0.126134   | 0.5456   | 0.694153    | no  |
| Pla2g16  | 22.1058 | 20.2934 | -0.123415   | 0.40105  | 0.560067    | no  |
| Pla2g6   | 3.15526 | 3.44044 | 0.124837    | 0.5225   | 0.674391    | no  |
| Plaa     | 16.1122 | 15.2765 | -0.0768346  | 0.59715  | 0.737447    | no  |
| Plac8    | 347.606 | 420.964 | 0.276245    | 0.05315  | 0.114464    | no  |
| Plag12   | 11.0838 | 10.3736 | -0.0955353  | 0.5232   | 0.674974    | no  |
| Plbd2    | 10.4259 | 11.1442 | 0.096115    | 0.53175  | 0.682412    | no  |
| Plcb2    | 32.4003 | 33.0325 | 0.0278789   | 0.8394   | 0.907951    | no  |
| Plcb3    | 3.63909 | 3.33642 | -0.125277   | 0.49555  | 0.650165    | no  |
| Plcd1    | 2.2917  | 2.40392 | 0.0689725   | 0.77425  | 0.866852    | no  |
| Plcg1    | 88.5356 | 99.0806 | 0.162346    | 0.2509   | 0.396574    | no  |
| Plcg2    | 5.14687 | 4.77625 | -0.107818   | 0.5276   | 0.678888    | no  |
| Plcl2    | 30.2566 | 29.3966 | -0.0416028  | 0.7705   | 0.864285    | no  |
| Plcxd1   | 1.10457 | 1.04858 | -0.0750498  | 0.8852   | 0.935836    | no  |
| Plcxd2   | 10.7495 | 12.9227 | 0.265634    | 0.06395  | 0.133491    | no  |
| Pld2     | 5.22908 | 3.634   | -0.525001   | 0.0035   | 0.010941    | yes |
| Pld3     | 105.193 | 97.1798 | -0.114314   | 0.42125  | 0.579663    | no  |
| Pld4     | 3.03245 | 1.24504 | -1.28429    | 5.00E-05 | 0.000236281 | yes |
| Plec     | 50.211  | 53.0193 | 0.078514    | 0.597    | 0.737326    | no  |
| Plek     | 136.871 | 108.022 | -0.341503   | 0.0169   | 0.0430564   | yes |
| Plekha1  | 6.24445 | 8.66598 | 0.472789    | 0.00605  | 0.0176784   | yes |
| Plekha2  | 36.7612 | 40.6933 | 0.146605    | 0.302    | 0.454581    | no  |
| Plekha3  | 18.4578 | 18.2961 | -0.0126952  | 0.93255  | 0.963228    | no  |
| Plekha5  | 11.7735 | 12.6275 | 0.10103     | 0.4976   | 0.65203     | no  |
| Plekha6  | 1.76395 | 1.94173 | 0.138537    | 0.45625  | 0.613777    | no  |
| Plekhb2  | 45.9356 | 42.9275 | -0.0977113  | 0.49405  | 0.648751    | no  |
| Plekhf1  | 7.30029 | 4.13288 | -0.820808   | 0.00025  | 0.00103712  | yes |
| Plekhf2  | 15.9764 | 13.6175 | -0.230481   | 0.13545  | 0.246948    | no  |
| Plekhg2  | 24.119  | 25.0981 | 0.0574059   | 0.6823   | 0.803398    | no  |
| Plekhg3  | 9.29034 | 8.45631 | -0.135703   | 0.37345  | 0.532083    | no  |
| Plekhg5  | 4.08482 | 5.34869 | 0.388913    | 0.0287   | 0.0680223   | no  |
| Plekhj1  | 61.8436 | 56.8464 | -0.121554   | 0.40995  | 0.568872    | no  |
| Plekhm1  | 15.441  | 15.0472 | -0.0372707  | 0.798    | 0.882386    | no  |
| Plekhm2  | 10.5937 | 10.9611 | 0.049184    | 0.7521   | 0.851891    | no  |
| Plekhm3  | 2.30428 | 3.33443 | 0.533126    | 0.00175  | 0.00592472  | yes |
| Plekhn1  | 6.16479 | 7.20231 | 0.224409    | 0.22425  | 0.366593    | no  |
| Plekho1  | 15.9739 | 8.27001 | -0.949754   | 5.00E-05 | 0.000236281 | yes |
| Plekho2  | 32.8234 | 31.2252 | -0.0720172  | 0.60895  | 0.746776    | no  |

|         |          |         |             |          |             |     |
|---------|----------|---------|-------------|----------|-------------|-----|
| Plgrkt  | 91.3862  | 73.4836 | -0.314554   | 0.03795  | 0.0860922   | no  |
| Plin2   | 6.26357  | 5.35075 | -0.227242   | 0.25125  | 0.396819    | no  |
| Plin3   | 13.7782  | 16.7329 | 0.280296    | 0.0822   | 0.164298    | no  |
| Plk1    | 24.5063  | 14.4723 | -0.759854   | 5.00E-05 | 0.000236281 | yes |
| Plk3    | 13.9036  | 13.9118 | 0.000851858 | 0.99635  | 0.997367    | no  |
| Plk4    | 8.53307  | 5.89543 | -0.533468   | 0.0016   | 0.00547227  | yes |
| Plod1   | 5.36929  | 5.62185 | 0.0663145   | 0.7094   | 0.822641    | no  |
| Plod2   | 0.887723 | 1.14957 | 0.372907    | 0.1699   | 0.295337    | no  |
| Plod3   | 4.16152  | 4.77948 | 0.199743    | 0.38765  | 0.546839    | no  |
| Plp2    | 120.162  | 110.237 | -0.124361   | 0.4962   | 0.650763    | no  |
| Plrg1   | 28.8343  | 27.5642 | -0.0649869  | 0.6701   | 0.794547    | no  |
| Pls1    | 1.54273  | 2.18471 | 0.501955    | 0.02865  | 0.0679243   | no  |
| Plscr1  | 11.667   | 13.6516 | 0.226637    | 0.16855  | 0.293468    | no  |
| Plscr3  | 1.53835  | 1.51998 | -0.0173331  | 0.94995  | 0.973027    | no  |
| Pltp    | 6.28079  | 6.72051 | 0.0976248   | 0.922    | 0.957671    | no  |
| Plxdc1  | 3.83391  | 5.43511 | 0.503492    | 0.0091   | 0.0252515   | yes |
| Plxnc1  | 8.73856  | 9.67578 | 0.146983    | 0.3163   | 0.470348    | no  |
| Pmaip1  | 30.5598  | 30.1022 | -0.0217641  | 0.88255  | 0.934265    | no  |
| Pmel    | 2.64699  | 2.81422 | 0.088378    | 0.77755  | 0.869031    | no  |
| Pmf1    | 33.7396  | 23.8061 | -0.503111   | 0.0031   | 0.00983478  | yes |
| Pml     | 19.5809  | 19.083  | -0.0371544  | 0.80175  | 0.884827    | no  |
| Pmm1    | 18.4299  | 18.537  | 0.00836252  | 0.961    | 0.979004    | no  |
| Pmm2    | 54.2817  | 59.4116 | 0.13028     | 0.36265  | 0.520901    | no  |
| Pmpca   | 23.033   | 23.6053 | 0.0354087   | 0.86655  | 0.924804    | no  |
| Pmpcb   | 29.1044  | 27.9158 | -0.060153   | 0.69655  | 0.813702    | no  |
| Pms1    | 5.53407  | 5.08177 | -0.12301    | 0.48835  | 0.643373    | no  |
| Pms2    | 9.61002  | 9.26214 | -0.0531944  | 0.74505  | 0.847264    | no  |
| Pmvk    | 17.395   | 17.5339 | 0.0114708   | 0.9449   | 0.970135    | no  |
| Pnkd    | 34.0482  | 34.532  | 0.020354    | 0.9224   | 0.957889    | no  |
| Pnkp    | 35.6447  | 35.0842 | -0.0228665  | 0.87585  | 0.930424    | no  |
| Pnn     | 66.0069  | 65.8959 | -0.00242926 | 0.9858   | 0.991758    | no  |
| Pno1    | 17.9545  | 18.232  | 0.0221251   | 0.89225  | 0.939658    | no  |
| Pnp     | 20.1555  | 19.5855 | -0.0413894  | 0.77765  | 0.869129    | no  |
| Pnpla2  | 32.4267  | 32.3718 | -0.00244584 | 0.98615  | 0.991912    | no  |
| Pnpla6  | 10.2805  | 11.6314 | 0.178116    | 0.24515  | 0.390247    | no  |
| Pnpla7  | 21.2914  | 27.8897 | 0.389462    | 0.00605  | 0.0176784   | yes |
| Pnpla8  | 5.61994  | 5.20234 | -0.111395   | 0.50515  | 0.659121    | no  |
| Pnpo    | 12.8331  | 14.0921 | 0.135017    | 0.41605  | 0.574749    | no  |
| Pnpt1   | 18.083   | 20.0799 | 0.151117    | 0.3149   | 0.468711    | no  |
| Pnrc1   | 105.373  | 104.219 | -0.0158882  | 0.9078   | 0.949278    | no  |
| Pnrc2   | 84.0673  | 75.7809 | -0.149711   | 0.29575  | 0.447358    | no  |
| Poc1a   | 9.16309  | 5.85168 | -0.646983   | 0.00155  | 0.00531723  | yes |
| Poc1b   | 8.467    | 7.56219 | -0.163047   | 0.4755   | 0.631762    | no  |
| Poc5    | 7.88259  | 8.09735 | 0.0387807   | 0.8225   | 0.897733    | no  |
| Podnl1  | 6.77195  | 11.4121 | 0.752924    | 0.00015  | 0.000653255 | yes |
| Pofut1  | 7.01445  | 6.47652 | -0.115112   | 0.4652   | 0.622165    | no  |
| Pofut2  | 16.1772  | 16.3235 | 0.0129917   | 0.93585  | 0.96514     | no  |
| Pogk    | 21.5277  | 18.7424 | -0.199889   | 0.2293   | 0.372562    | no  |
| Poglut1 | 11.032   | 12.5341 | 0.184156    | 0.2566   | 0.401617    | no  |
| Pogz    | 6.95968  | 7.4303  | 0.0943992   | 0.5239   | 0.675642    | no  |
| Pola1   | 8.32691  | 6.36117 | -0.388489   | 0.0141   | 0.0368458   | yes |
| Pola2   | 23.3801  | 21.4537 | -0.124055   | 0.41215  | 0.571015    | no  |
| Polb    | 26.4428  | 30.4665 | 0.204349    | 0.2596   | 0.40527     | no  |
| Pold1   | 20.433   | 16.7625 | -0.28566    | 0.0558   | 0.11938     | no  |
| Pold2   | 24.1644  | 22.4498 | -0.106179   | 0.4941   | 0.648793    | no  |
| Pold3   | 21.8038  | 21.4609 | -0.0228673  | 0.87715  | 0.931161    | no  |
| Pold4   | 57.7198  | 53.3834 | -0.112675   | 0.47075  | 0.627258    | no  |

|         |         |         |             |          |             |     |
|---------|---------|---------|-------------|----------|-------------|-----|
| Poldip2 | 13.7171 | 13.5669 | -0.0158872  | 0.9232   | 0.95817     | no  |
| Poldip3 | 45.2453 | 43.041  | -0.0720572  | 0.6064   | 0.744778    | no  |
| Pole    | 5.62848 | 3.50878 | -0.681774   | 5.00E-05 | 0.000236281 | yes |
| Pole2   | 10.9816 | 9.3761  | -0.228025   | 0.20675  | 0.344821    | no  |
| Pole3   | 31.593  | 31.1575 | -0.0200262  | 0.9165   | 0.954219    | no  |
| Pole4   | 45.1238 | 37.7384 | -0.257856   | 0.08365  | 0.166775    | no  |
| Polg    | 21.3445 | 22.0245 | 0.0452475   | 0.75995  | 0.857192    | no  |
| Polg2   | 7.12137 | 8.2989  | 0.220764    | 0.35085  | 0.508213    | no  |
| Polh    | 11.3773 | 9.0973  | -0.32265    | 0.05385  | 0.11577     | no  |
| Poli    | 14.4705 | 15.9892 | 0.143975    | 0.3583   | 0.516187    | no  |
| Polk    | 8.69335 | 8.39186 | -0.0509214  | 0.7388   | 0.843077    | no  |
| Poll    | 11.3783 | 11.7417 | 0.0453547   | 0.7854   | 0.874343    | no  |
| Polm    | 23.6121 | 20.894  | -0.176433   | 0.23655  | 0.381148    | no  |
| Polq    | 2.29463 | 1.42171 | -0.690637   | 1.00E-04 | 0.000450026 | yes |
| Polr1a  | 7.57976 | 9.02449 | 0.251693    | 0.10055  | 0.194152    | no  |
| Polr1b  | 5.3959  | 6.67525 | 0.306959    | 0.0683   | 0.140888    | no  |
| Polr1c  | 31.3492 | 30.6504 | -0.0325241  | 0.8355   | 0.905703    | no  |
| Polr1d  | 225.257 | 194.389 | -0.212625   | 0.13745  | 0.249659    | no  |
| Polr1e  | 7.78069 | 8.49381 | 0.126513    | 0.4364   | 0.594438    | no  |
| Polr2a  | 69.2863 | 63.1534 | -0.13371    | 0.34     | 0.49646     | no  |
| Polr2b  | 29.7152 | 29.5507 | -0.00800735 | 0.9536   | 0.975139    | no  |
| Polr2c  | 32.4703 | 32.8507 | 0.0168052   | 0.91525  | 0.953522    | no  |
| Polr2d  | 47.0559 | 50.77   | 0.1096      | 0.4767   | 0.632916    | no  |
| Polr2e  | 67.1564 | 69.8095 | 0.0558984   | 0.7023   | 0.817402    | no  |
| Polr2f  | 85.2898 | 92.7405 | 0.120826    | 0.45865  | 0.616125    | no  |
| Polr2g  | 82.7629 | 77.6708 | -0.0916111  | 0.54115  | 0.690446    | no  |
| Polr2h  | 31.602  | 34.6973 | 0.134809    | 0.4351   | 0.593194    | no  |
| Polr2i  | 28.6007 | 27.1624 | -0.0744403  | 0.69175  | 0.810294    | no  |
| Polr2j  | 107.868 | 97.7851 | -0.141584   | 0.35915  | 0.517052    | no  |
| Polr2k  | 81.5982 | 80.4964 | -0.0196142  | 0.90845  | 0.949549    | no  |
| Polr2l  | 21.9652 | 27.1525 | 0.305865    | 0.04985  | 0.108516    | no  |
| Polr2m  | 84.3142 | 79.5269 | -0.0843315  | 0.5519   | 0.699659    | no  |
| Polr3a  | 10.8848 | 11.5674 | 0.0877464   | 0.564    | 0.709784    | no  |
| Polr3b  | 14.0984 | 14.8839 | 0.0782193   | 0.591    | 0.732364    | no  |
| Polr3c  | 67.0399 | 58.4814 | -0.197041   | 0.17195  | 0.298255    | no  |
| Polr3d  | 7.35875 | 8.49718 | 0.207522    | 0.25785  | 0.403145    | no  |
| Polr3e  | 8.27337 | 10.5117 | 0.345448    | 0.027    | 0.0645939   | no  |
| Polr3f  | 9.88552 | 9.06611 | -0.124833   | 0.4159   | 0.57462     | no  |
| Polr3g  | 4.87967 | 4.88655 | 0.00203142  | 0.994    | 0.996202    | no  |
| Polr3gl | 19.9316 | 17.5725 | -0.181736   | 0.2796   | 0.429184    | no  |
| Polr3h  | 3.02179 | 4.00825 | 0.40757     | 0.56035  | 0.706741    | no  |
| Polr3k  | 17.9262 | 19.0067 | 0.0844413   | 0.5752   | 0.71916     | no  |
| Polrmt  | 10.4124 | 10.9079 | 0.0670599   | 0.66605  | 0.79138     | no  |
| Pom121  | 15.0167 | 15.9854 | 0.0901929   | 0.5757   | 0.719594    | no  |
| Pomc    | 1.641   | 1.6609  | 0.0173851   | 0.96185  | 0.979615    | no  |
| Pomgnt1 | 8.38304 | 8.1127  | -0.047292   | 0.7834   | 0.872957    | no  |
| Pomk    | 3.51108 | 4.48216 | 0.35228     | 0.05865  | 0.124463    | no  |
| Pomp    | 250.362 | 236.119 | -0.0844988  | 0.5502   | 0.698193    | no  |
| Pomt1   | 2.65541 | 2.05546 | -0.369476   | 0.4558   | 0.613347    | no  |
| Pomt2   | 1.26462 | 1.58045 | 0.321634    | 0.23535  | 0.379673    | no  |
| Pon2    | 43.8373 | 41.1378 | -0.0916935  | 0.52905  | 0.680221    | no  |
| Pop1    | 5.30236 | 7.0254  | 0.405945    | 0.01915  | 0.0480107   | yes |
| Pop4    | 34.2438 | 34.422  | 0.00748782  | 0.9615   | 0.979344    | no  |
| Pop5    | 38.0427 | 40.1606 | 0.0781616   | 0.6233   | 0.758448    | no  |
| Pop7    | 37.5381 | 35.0965 | -0.0970287  | 0.5583   | 0.705087    | no  |
| Popdc2  | 3.51997 | 4.32091 | 0.295772    | 0.1639   | 0.287206    | no  |
| Por     | 21.2679 | 21.3236 | 0.0037679   | 0.97945  | 0.988455    | no  |

|          |         |         |            |         |            |     |
|----------|---------|---------|------------|---------|------------|-----|
| Pot1a    | 15.4032 | 15.6799 | 0.0256906  | 0.86785 | 0.925713   | no  |
| Pot1b    | 14.2644 | 13.315  | -0.0993649 | 0.51375 | 0.666645   | no  |
| Pou2af1  | 1.50857 | 2.32759 | 0.625658   | 0.0146  | 0.0379571  | yes |
| Pou2f1   | 2.92642 | 2.78189 | -0.073069  | 0.8874  | 0.936912   | no  |
| Pou2f2   | 8.89934 | 10.6952 | 0.265195   | 0.1026  | 0.197413   | no  |
| Pou6f1   | 14.3367 | 19.591  | 0.45048    | 0.00215 | 0.00711112 | yes |
| Pp2d1    | 1.09466 | 1.07546 | -0.0255258 | 0.97425 | 0.98597    | no  |
| Ppa1     | 18.208  | 19.2392 | 0.0794789  | 0.6389  | 0.770741   | no  |
| Ppa2     | 20.0986 | 18.9742 | -0.0830581 | 0.6329  | 0.766127   | no  |
| Ppan     | 17.2874 | 21.3895 | 0.307186   | 0.0601  | 0.127104   | no  |
| Ppap2c   | 1.43189 | 1.34394 | -0.0914438 | 0.7872  | 0.87556    | no  |
| Ppapdc1b | 4.21869 | 5.25372 | 0.316546   | 0.17295 | 0.299562   | no  |
| Ppapdc2  | 8.67969 | 9.28437 | 0.0971607  | 0.55835 | 0.705125   | no  |
| Ppard    | 5.8741  | 6.93774 | 0.240098   | 0.16855 | 0.293468   | no  |
| Ppargc1b | 1.67221 | 2.44086 | 0.545628   | 0.01655 | 0.0422807  | yes |
| Ppat     | 8.50658 | 9.36715 | 0.139032   | 0.66735 | 0.792338   | no  |
| Ppcdc    | 16.0656 | 16.9113 | 0.0740123  | 0.63015 | 0.763768   | no  |
| Ppcs     | 15.5397 | 17.8962 | 0.203698   | 0.2361  | 0.380562   | no  |
| Ppdpf    | 76.9667 | 81.5455 | 0.0833721  | 0.58495 | 0.727408   | no  |
| Ppfia1   | 18.7047 | 19.127  | 0.032208   | 0.8224  | 0.897707   | no  |
| Ppfibp1  | 1.46664 | 1.34984 | -0.119727  | 0.58935 | 0.73105    | no  |
| Pphn1    | 11.9287 | 12.029  | 0.0120721  | 0.9368  | 0.965724   | no  |
| Ppia     | 2626.32 | 2345    | -0.163451  | 0.2835  | 0.433605   | no  |
| Ppib     | 309.168 | 285.704 | -0.11387   | 0.5062  | 0.660149   | no  |
| Ppic     | 13.2209 | 17.1771 | 0.377672   | 0.0324  | 0.0752751  | no  |
| Ppid     | 40.5888 | 39.0403 | -0.0561185 | 0.70165 | 0.816974   | no  |
| Ppie     | 31.1652 | 36.1464 | 0.213916   | 0.1773  | 0.305574   | no  |
| Ppif     | 26.7189 | 24.8945 | -0.102038  | 0.5315  | 0.682265   | no  |
| Ppig     | 19.1858 | 18.0203 | -0.090411  | 0.51735 | 0.6699     | no  |
| Ppih     | 40.6041 | 34.025  | -0.255033  | 0.14155 | 0.255188   | no  |
| Ppil1    | 52.8452 | 47.0531 | -0.167481  | 0.26595 | 0.412991   | no  |
| Ppil2    | 82.2344 | 79.9698 | -0.0402868 | 0.78455 | 0.873838   | no  |
| Ppil3    | 37.7521 | 36.9526 | -0.0308801 | 0.8497  | 0.914245   | no  |
| Ppil4    | 35.4307 | 34.4209 | -0.0417159 | 0.76875 | 0.863077   | no  |
| Ppip5k1  | 2.64575 | 2.42179 | -0.127601  | 0.50535 | 0.659346   | no  |
| Ppip5k2  | 14.8693 | 15.9324 | 0.0996249  | 0.492   | 0.646685   | no  |
| Ppm1a    | 32.1767 | 30.1224 | -0.0951806 | 0.5073  | 0.660937   | no  |
| Ppm1b    | 42.119  | 40.0589 | -0.0723452 | 0.6331  | 0.766251   | no  |
| Ppm1d    | 12.6519 | 12.7163 | 0.00732549 | 0.96225 | 0.979811   | no  |
| Ppm1f    | 9.50464 | 11.3658 | 0.25799    | 0.0887  | 0.175127   | no  |
| Ppm1g    | 109.349 | 101.352 | -0.109568  | 0.73345 | 0.839077   | no  |
| Ppm1h    | 24.2235 | 26.7334 | 0.142233   | 0.3323  | 0.487993   | no  |
| Ppm1j    | 45.1888 | 42.1779 | -0.0994768 | 0.50015 | 0.654375   | no  |
| Ppm1k    | 3.20292 | 3.71991 | 0.21588    | 0.2163  | 0.356895   | no  |
| Ppm1m    | 42.8992 | 45.2185 | 0.0759624  | 0.609   | 0.746776   | no  |
| Ppm1n    | 0.60165 | 1.14722 | 0.931145   | 0.03    | 0.0705373  | no  |
| Ppme1    | 25.0399 | 23.3959 | -0.0979745 | 0.5173  | 0.669872   | no  |
| Ppox     | 16.4434 | 16.8465 | 0.034946   | 0.8303  | 0.902603   | no  |
| Ppp1ca   | 638.125 | 624.058 | -0.0321593 | 0.83205 | 0.903643   | no  |
| Ppp1cb   | 61.463  | 56.9383 | -0.11032   | 0.43495 | 0.593081   | no  |
| Ppp1cc   | 193.418 | 182.687 | -0.0823453 | 0.5643  | 0.71001    | no  |
| Ppp1r10  | 12.3481 | 13.0185 | 0.0762717  | 0.6082  | 0.746168   | no  |
| Ppp1r11  | 27.1959 | 26.9615 | -0.0124864 | 0.93655 | 0.965608   | no  |
| Ppp1r12a | 127.869 | 128.566 | 0.00784524 | 0.9565  | 0.976703   | no  |
| Ppp1r12b | 4.23128 | 3.84274 | -0.138958  | 0.4647  | 0.621755   | no  |
| Ppp1r12c | 52.6659 | 49.8169 | -0.0802352 | 0.5684  | 0.713312   | no  |
| Ppp1r13b | 11.3671 | 11.7757 | 0.0509468  | 0.7361  | 0.841138   | no  |

|          |         |         |             |          |             |     |
|----------|---------|---------|-------------|----------|-------------|-----|
| Ppp1r14b | 42.9344 | 47.6596 | 0.150631    | 0.34155  | 0.498115    | no  |
| Ppp1r15a | 132.686 | 148.285 | 0.16036     | 0.25795  | 0.403274    | no  |
| Ppp1r15b | 51.9492 | 51.7618 | -0.00521416 | 0.9714   | 0.984271    | no  |
| Ppp1r16a | 5.79594 | 6.07603 | 0.0680865   | 0.7059   | 0.820118    | no  |
| Ppp1r16b | 14.9542 | 17.1409 | 0.196893    | 0.17215  | 0.298528    | no  |
| Ppp1r18  | 195.745 | 183.568 | 0           | 1        | 1           | no  |
| Ppp1r2   | 16.1111 | 14.4757 | -0.154425   | 0.57765  | 0.721138    | no  |
| Ppp1r21  | 24.8891 | 23.5731 | -0.0783746  | 0.5877   | 0.729748    | no  |
| Ppp1r35  | 36.9327 | 33.4451 | -0.143101   | 0.38565  | 0.54466     | no  |
| Ppp1r37  | 12.6199 | 13.5581 | 0.103457    | 0.50955  | 0.662938    | no  |
| Ppp1r3e  | 2.36363 | 2.74305 | 0.214776    | 0.4097   | 0.56867     | no  |
| Ppp1r3f  | 1.22068 | 1.87386 | 0.618331    | 0.16185  | 0.284228    | no  |
| Ppp1r7   | 13.3245 | 12.046  | -0.145533   | 0.338    | 0.494358    | no  |
| Ppp1r8   | 35.7994 | 34.0205 | -0.0735335  | 0.61415  | 0.751212    | no  |
| Ppp1r9b  | 89.3476 | 99.6034 | 0.156765    | 0.26925  | 0.417006    | no  |
| Ppp2ca   | 147.725 | 144.502 | -0.031825   | 0.82285  | 0.897976    | no  |
| Ppp2cb   | 66.279  | 64.172  | -0.0466076  | 0.77975  | 0.870483    | no  |
| Ppp2r1a  | 109.602 | 114.572 | 0.06398     | 0.6457   | 0.775979    | no  |
| Ppp2r1b  | 17.4792 | 16.909  | -0.0478514  | 0.77265  | 0.865679    | no  |
| Ppp2r2a  | 21.9929 | 20.7526 | -0.0837509  | 0.56425  | 0.70996     | no  |
| Ppp2r2d  | 25.9662 | 24.5899 | -0.0785692  | 0.6052   | 0.743887    | no  |
| Ppp2r3c  | 16.204  | 14.9753 | -0.113763   | 0.5073   | 0.660937    | no  |
| Ppp2r4   | 74.334  | 70.434  | -0.0777511  | 0.58335  | 0.726109    | no  |
| Ppp2r5a  | 159.14  | 160.875 | 0.0156397   | 0.9141   | 0.952915    | no  |
| Ppp2r5b  | 12.2614 | 11.5602 | -0.0849625  | 0.59745  | 0.737753    | no  |
| Ppp2r5c  | 122.883 | 105.642 | -0.218105   | 0.14255  | 0.256492    | no  |
| Ppp2r5d  | 29.7282 | 28.0812 | -0.0822288  | 0.69715  | 0.81408     | no  |
| Ppp2r5e  | 19.8705 | 18.6918 | -0.0882218  | 0.5359   | 0.686191    | no  |
| Ppp3ca   | 41.3727 | 43.2421 | 0.0637561   | 0.6603   | 0.787291    | no  |
| Ppp3cb   | 47.0389 | 43.3534 | -0.117708   | 0.4192   | 0.577777    | no  |
| Ppp3cc   | 91.497  | 91.1637 | -0.00526407 | 0.97075  | 0.984008    | no  |
| Ppp3r1   | 61.9881 | 57.1708 | -0.116714   | 0.41105  | 0.569928    | no  |
| Ppp4c    | 160.175 | 146.357 | -0.130154   | 0.35425  | 0.511846    | no  |
| Ppp4r1   | 21.6733 | 21.2819 | -0.0262914  | 0.85735  | 0.919364    | no  |
| Ppp4r2   | 63.3812 | 51.7815 | -0.291618   | 0.03805  | 0.0862719   | no  |
| Ppp5c    | 42.2176 | 44.5946 | 0.0790247   | 0.5903   | 0.731817    | no  |
| Ppp6c    | 45.2699 | 37.8721 | -0.257415   | 0.0856   | 0.169958    | no  |
| Ppp6r1   | 129.11  | 152.286 | 0.238186    | 0.09995  | 0.193183    | no  |
| Ppp6r2   | 12.1197 | 11.9926 | -0.0152142  | 0.92505  | 0.95906     | no  |
| Ppp6r3   | 35.165  | 32.9109 | -0.0955724  | 0.50015  | 0.654375    | no  |
| Pprc1    | 5.76178 | 7.0404  | 0.289142    | 0.0694   | 0.142789    | no  |
| Ppt1     | 28.9322 | 29.5442 | 0.0301996   | 0.8392   | 0.907818    | no  |
| Ppt2     | 8.83454 | 9.52863 | 0.109113    | 0.55225  | 0.699914    | no  |
| Pptc7    | 12.4818 | 11.3412 | -0.138257   | 0.3614   | 0.519571    | no  |
| Ppwd1    | 6.66119 | 6.92882 | 0.0568299   | 0.7877   | 0.875895    | no  |
| Pqbp1    | 72.5046 | 70.9707 | -0.0308483  | 0.8353   | 0.90564     | no  |
| Pqlc1    | 6.81269 | 7.19821 | 0.0794143   | 0.67655  | 0.799174    | no  |
| Pqlc2    | 2.44295 | 1.8708  | -0.384967   | 0.1444   | 0.259102    | no  |
| Pqlc3    | 54.298  | 51.1908 | -0.0850147  | 0.5518   | 0.699582    | no  |
| Pradc1   | 9.3238  | 8.58003 | -0.119935   | 0.87585  | 0.930424    | no  |
| Praf2    | 14.2584 | 14.1351 | -0.0125351  | 0.94275  | 0.968999    | no  |
| Pramef8  | 12.0247 | 11.7196 | -0.0370736  | 0.81025  | 0.890227    | no  |
| Prc1     | 29.1053 | 16.7546 | -0.79672    | 5.00E-05 | 0.000236281 | yes |
| Prcc     | 32.0861 | 33.6852 | 0.0701635   | 0.63685  | 0.769075    | no  |
| Prcp     | 8.41022 | 7.92527 | -0.0856846  | 0.6046   | 0.743396    | no  |
| Prdm1    | 10.8953 | 8.6861  | -0.326926   | 0.0333   | 0.0770819   | no  |
| Prdm10   | 3.26412 | 3.19513 | -0.0308193  | 0.87275  | 0.928543    | no  |

|          |         |         |             |          |             |     |
|----------|---------|---------|-------------|----------|-------------|-----|
| Prdm11   | 2.38923 | 3.23053 | 0.435226    | 0.0821   | 0.164121    | no  |
| Prdm15   | 5.73331 | 5.58469 | -0.0378923  | 0.809    | 0.889504    | no  |
| Prdm2    | 23.561  | 23.771  | 0.0127978   | 0.92745  | 0.960434    | no  |
| Prdm4    | 12.7419 | 15.6922 | 0.300465    | 0.0438   | 0.0972473   | no  |
| Prdm9    | 1.1196  | 1.43343 | 0.356484    | 0.176    | 0.303705    | no  |
| Prdx1    | 204.528 | 177.471 | -0.204708   | 0.1442   | 0.258822    | no  |
| Prdx2    | 110.279 | 109.477 | -0.0105348  | 0.94065  | 0.967884    | no  |
| Prdx3    | 51.5015 | 55.0568 | 0.0963041   | 0.5126   | 0.665679    | no  |
| Prdx4    | 23.4109 | 17.7058 | -0.402958   | 0.02465  | 0.0598153   | no  |
| Prdx5    | 120.156 | 113.496 | -0.0822738  | 0.58285  | 0.725743    | no  |
| Prdx6    | 46.5242 | 57.7755 | 0.312478    | 0.0293   | 0.0692096   | no  |
| Preb     | 21.0433 | 21.196  | 0.0104338   | 0.9823   | 0.989788    | no  |
| Prelid1  | 334.124 | 305.628 | -0.128607   | 0.37405  | 0.53269     | no  |
| Prep     | 19.9716 | 20.0577 | 0.00620324  | 0.96725  | 0.982195    | no  |
| Prepl    | 7.11577 | 7.42601 | 0.0615675   | 0.7136   | 0.825504    | no  |
| Prex1    | 164.487 | 178.475 | 0.117746    | 0.42975  | 0.588024    | no  |
| Prf1     | 90.5748 | 69.5792 | -0.380453   | 0.0081   | 0.022802    | yes |
| Prg4     | 1.47404 | 1.50844 | 0.0332826   | 0.9887   | 0.993358    | no  |
| Prickle3 | 15.1672 | 16.7931 | 0.146912    | 0.5938   | 0.734763    | no  |
| Prim1    | 25.1542 | 16.6781 | -0.592844   | 0.00035  | 0.0014053   | yes |
| Prim2    | 11.0601 | 8.64926 | -0.354715   | 0.04595  | 0.101282    | no  |
| Primpol  | 9.40634 | 9.41118 | 0.000741347 | 0.9967   | 0.997633    | no  |
| Prkaa1   | 16.1563 | 16.1932 | 0.00329792  | 0.98205  | 0.98965     | no  |
| Prkab1   | 44.8562 | 37.3275 | -0.26507    | 0.06645  | 0.137663    | no  |
| Prkab2   | 5.36628 | 5.22895 | -0.0373998  | 0.8244   | 0.898984    | no  |
| Prkaca   | 22.0455 | 20.5043 | -0.104555   | 0.4878   | 0.642865    | no  |
| Prkacb   | 86.3509 | 84.763  | -0.026776   | 0.848    | 0.913251    | no  |
| Prkag1   | 110.65  | 99.5458 | -0.152568   | 0.2845   | 0.434739    | no  |
| Prkag2   | 19.3073 | 17.3561 | -0.153706   | 0.32815  | 0.48368     | no  |
| Prkar1a  | 181.698 | 200.171 | 0.139688    | 0.3341   | 0.490086    | no  |
| Prkar2a  | 10.2209 | 11.2995 | 0.144734    | 0.3457   | 0.502703    | no  |
| Prkar2b  | 1.37761 | 0.87423 | -0.656086   | 0.0196   | 0.0489684   | yes |
| Prkca    | 13.0071 | 12.4476 | -0.0634345  | 0.66215  | 0.788645    | no  |
| Prkcb    | 38.189  | 38.3015 | 0.00424097  | 0.9765   | 0.986974    | no  |
| Prkcd    | 33.8361 | 31.8636 | -0.0866517  | 0.55045  | 0.698435    | no  |
| Prkce    | 2.53905 | 2.36865 | -0.100225   | 0.5794   | 0.72276     | no  |
| Prkch    | 123.36  | 113.372 | -0.121818   | 0.39305  | 0.552206    | no  |
| Prkci    | 3.6094  | 3.67247 | 0.0249911   | 0.89105  | 0.938954    | no  |
| Prkcq    | 141.006 | 136.616 | -0.0456274  | 0.74695  | 0.848577    | no  |
| Prkcsh   | 65.0803 | 67.4818 | 0.0522788   | 0.7153   | 0.826577    | no  |
| Prkcz    | 7.88586 | 9.49934 | 0.26856     | 0.08615  | 0.170881    | no  |
| Prkd2    | 85.2334 | 96.1976 | 0.174581    | 0.22005  | 0.361309    | no  |
| Prkd3    | 16.4757 | 22.0329 | 0.419321    | 0.00395  | 0.0121693   | yes |
| Prkdc    | 9.23603 | 10.7386 | 0.217458    | 0.12935  | 0.238021    | no  |
| Prkra    | 2.47714 | 2.22889 | -0.152354   | 0.59035  | 0.731854    | no  |
| Prkrip1  | 10.7295 | 11.8266 | 0.140453    | 0.4272   | 0.585602    | no  |
| Prkrir   | 27.9433 | 28.3139 | 0.0190062   | 0.891    | 0.938944    | no  |
| Prkx     | 32.1747 | 35.9189 | 0.15882     | 0.26655  | 0.413732    | no  |
| Prmt1    | 62.8255 | 65.412  | 0.0582064   | 0.68915  | 0.808362    | no  |
| Prmt10   | 13.6307 | 13.1347 | -0.0534672  | 0.7334   | 0.839077    | no  |
| Prmt2    | 4.15908 | 5.22626 | 0.329515    | 0.1101   | 0.209209    | no  |
| Prmt3    | 11.2569 | 12.7765 | 0.182682    | 0.25515  | 0.399916    | no  |
| Prmt5    | 40.8666 | 43.2862 | 0.0829821   | 0.5577   | 0.704519    | no  |
| Prmt6    | 10.5037 | 11.2894 | 0.104077    | 0.52605  | 0.67745     | no  |
| Prmt7    | 10.405  | 10.6575 | 0.0345853   | 0.8355   | 0.905703    | no  |
| Prnp     | 193.476 | 87.8406 | -1.1392     | 5.00E-05 | 0.000236281 | yes |
| Prorsd1  | 8.06974 | 9.15953 | 0.182752    | 0.30615  | 0.459124    | no  |



|         |          |         |             |          |             |     |
|---------|----------|---------|-------------|----------|-------------|-----|
| Prosc   | 19.1127  | 18.695  | -0.0318769  | 0.8531   | 0.916547    | no  |
| Proser1 | 14.6116  | 13.9385 | -0.0680386  | 0.6501   | 0.779435    | no  |
| Proz    | 2.35611  | 2.22309 | -0.0838403  | 0.72755  | 0.834964    | no  |
| Prpf18  | 32.6864  | 31.7922 | -0.0400181  | 0.78265  | 0.872451    | no  |
| Prpf19  | 20.6746  | 21.2451 | 0.0392723   | 0.78315  | 0.872788    | no  |
| Prpf3   | 17.4488  | 17.2176 | -0.0192452  | 0.90065  | 0.945017    | no  |
| Prpf31  | 15.8791  | 15.7492 | -0.0118488  | 0.9405   | 0.967814    | no  |
| Prpf38a | 33.4928  | 31.416  | -0.0923514  | 0.5438   | 0.69275     | no  |
| Prpf38b | 79.4849  | 82.2598 | 0.0495067   | 0.72925  | 0.836058    | no  |
| Prpf39  | 22.8966  | 23.4662 | 0.0354502   | 0.86125  | 0.92164     | no  |
| Prpf4   | 10.8011  | 10.6896 | -0.0149697  | 0.91945  | 0.956049    | no  |
| Prpf40a | 36.8699  | 33.6796 | -0.130567   | 0.3537   | 0.511261    | no  |
| Prpf4b  | 48.8785  | 47.0668 | -0.0544909  | 0.69455  | 0.812172    | no  |
| Prpf6   | 33.6461  | 33.4425 | -0.00875744 | 0.95205  | 0.974325    | no  |
| Prpf8   | 63.5806  | 63.4658 | -0.0026067  | 0.9852   | 0.991465    | no  |
| Prps1   | 26.1887  | 31.2896 | 0.256739    | 0.092    | 0.180451    | no  |
| Prps1l3 | 16.0312  | 16.4056 | 0.0333031   | 0.82215  | 0.897559    | no  |
| Prps2   | 20.4766  | 19.5216 | -0.0689099  | 0.63595  | 0.76837     | no  |
| Prpsap1 | 43.8528  | 43.7207 | -0.00435212 | 0.97465  | 0.986135    | no  |
| Prpsap2 | 23.2643  | 23.9547 | 0.0421898   | 0.79265  | 0.879004    | no  |
| Prr11   | 9.4839   | 5.60428 | -0.758951   | 5.00E-05 | 0.000236281 | yes |
| Prr12   | 11.4951  | 11.8562 | 0.0446333   | 0.75755  | 0.855483    | no  |
| Prr13   | 334.809  | 359.406 | 0.102275    | 0.4664   | 0.623262    | no  |
| Prr14   | 61.829   | 56.6503 | -0.126199   | 0.37325  | 0.531884    | no  |
| Prr14l  | 9.99678  | 10.2833 | 0.040764    | 0.77425  | 0.866852    | no  |
| Prr24   | 9.02183  | 8.47903 | -0.0895204  | 0.6365   | 0.768811    | no  |
| Prr3    | 16.5243  | 17.986  | 0.122285    | 0.50585  | 0.659815    | no  |
| Prr5    | 3.73556  | 5.73898 | 0.619469    | 0.00605  | 0.0176784   | yes |
| Prr5l   | 1.59753  | 2.30249 | 0.527354    | 0.01435  | 0.0373953   | yes |
| Prr7    | 11.2836  | 18.1379 | 0.684776    | 0.00015  | 0.000653255 | yes |
| Prrc1   | 8.88064  | 9.23121 | 0.0558564   | 0.71895  | 0.829003    | no  |
| Prrc2a  | 89.2252  | 96.023  | 0.105928    | 0.45725  | 0.614736    | no  |
| Prrc2b  | 71.468   | 73.2363 | 0.0352608   | 0.81235  | 0.891521    | no  |
| Prrc2c  | 44.6701  | 49.4849 | 0.147679    | 0.3038   | 0.45658     | no  |
| Prrg2   | 1.4562   | 1.23506 | -0.237622   | 0.52905  | 0.680221    | no  |
| Prrt1   | 0.912531 | 1.47799 | 0.695693    | 0.1451   | 0.26012     | no  |
| Prrt2   | 1.34347  | 2.23175 | 0.732205    | 0.0061   | 0.0177994   | yes |
| Prss12  | 0.490741 | 1.27588 | 1.37846     | 0.00055  | 0.0021091   | yes |
| Prss16  | 3.35082  | 5.79813 | 0.791074    | 4.00E-04 | 0.00158415  | yes |
| Prss2   | 1.02342  | 1.04521 | 0.0304      | 0.95265  | 0.974605    | no  |
| Prss30  | 2.97182  | 5.66236 | 0.930056    | 3.00E-04 | 0.00122185  | yes |
| Prss53  | 4.16035  | 4.26778 | 0.0367833   | 0.94325  | 0.969259    | no  |
| Prss57  | 1.44349  | 1.09491 | -0.398748   | 0.1899   | 0.322883    | no  |
| Prune   | 24.8916  | 22.9132 | -0.119484   | 0.4106   | 0.569505    | no  |
| Psap    | 265.607  | 237.648 | -0.160471   | 0.263    | 0.409437    | no  |
| Psat1   | 24.7782  | 20.1778 | -0.296305   | 0.0503   | 0.109327    | no  |
| Psd     | 1.49739  | 1.65499 | 0.144365    | 0.79045  | 0.877778    | no  |
| Psd4    | 66.666   | 65.3836 | -0.0280219  | 0.8408   | 0.908936    | no  |
| Psen1   | 32.8686  | 31.7641 | -0.0493123  | 0.7334   | 0.839077    | no  |
| Psen2   | 19.8017  | 20.6124 | 0.0578909   | 0.7073   | 0.82111     | no  |
| Psenen  | 182.924  | 167.349 | -0.128386   | 0.37405  | 0.53269     | no  |
| Psip1   | 61.8883  | 52.8464 | -0.227863   | 0.12105  | 0.225762    | no  |
| Pskh1   | 12.8667  | 14.9867 | 0.220036    | 0.1535   | 0.27224     | no  |
| Psma1   | 131.363  | 122.996 | -0.094946   | 0.50455  | 0.658618    | no  |
| Psma2   | 202.129  | 181.693 | -0.153772   | 0.27555  | 0.424425    | no  |
| Psma3   | 122.589  | 121.665 | -0.0109156  | 0.943    | 0.969172    | no  |
| Psma4   | 147.762  | 137.093 | -0.108119   | 0.4511   | 0.608577    | no  |

|         |         |         |             |         |           |    |
|---------|---------|---------|-------------|---------|-----------|----|
| Psma5   | 86.9543 | 80.1468 | -0.117614   | 0.4149  | 0.573677  | no |
| Psma6   | 149.463 | 135.084 | -0.145929   | 0.3059  | 0.458837  | no |
| Psma7   | 152.935 | 151.912 | -0.009681   | 0.94655 | 0.971104  | no |
| Psemb1  | 280.179 | 262.607 | -0.0934452  | 0.5094  | 0.662877  | no |
| Psemb10 | 156.546 | 152.424 | -0.038495   | 0.78495 | 0.874132  | no |
| Psemb2  | 127.622 | 118.545 | -0.106447   | 0.4614  | 0.618489  | no |
| Psemb3  | 274.208 | 247.648 | -0.146978   | 0.30365 | 0.456403  | no |
| Psemb4  | 228.973 | 224.65  | -0.0275014  | 0.84625 | 0.912062  | no |
| Psemb5  | 120.062 | 121.795 | 0.0206847   | 0.88445 | 0.935379  | no |
| Psemb6  | 90.8258 | 82.1297 | -0.145198   | 0.31985 | 0.474498  | no |
| Psemb7  | 140.915 | 123.874 | -0.185953   | 0.19525 | 0.329874  | no |
| Psemb8  | 299.256 | 308.712 | 0.0448839   | 0.75425 | 0.853272  | no |
| Psemb9  | 266.209 | 238.796 | -0.156781   | 0.2706  | 0.418509  | no |
| Psmc1   | 80.5105 | 74.4808 | -0.112309   | 0.4359  | 0.593997  | no |
| Psmc2   | 63.1623 | 56.219  | -0.168007   | 0.23815 | 0.382939  | no |
| Psmc3   | 92.7492 | 89.3515 | -0.0538442  | 0.7028  | 0.817755  | no |
| Psmc3ip | 4.04979 | 3.90085 | -0.054058   | 0.9405  | 0.967814  | no |
| Psmc4   | 80.4241 | 76.2004 | -0.077829   | 0.58045 | 0.723609  | no |
| Psmc5   | 76.1277 | 76.0352 | -0.00175381 | 0.9904  | 0.994175  | no |
| Psmc6   | 61.233  | 56.9062 | -0.105725   | 0.4663  | 0.623187  | no |
| Psmc1   | 29.6001 | 28.3893 | -0.0602534  | 0.67165 | 0.79553   | no |
| Psmc10  | 24.5105 | 22.6755 | -0.112266   | 0.47705 | 0.63313   | no |
| Psmc11  | 42.4501 | 39.8936 | -0.0896105  | 0.5436  | 0.692607  | no |
| Psmc12  | 45.3035 | 39.9422 | -0.181709   | 0.2196  | 0.360746  | no |
| Psmc13  | 87.4255 | 83.9641 | -0.0582816  | 0.6848  | 0.805334  | no |
| Psmc14  | 80.4427 | 71.7189 | -0.165608   | 0.24395 | 0.388916  | no |
| Psmc2   | 81.6817 | 82.1807 | 0.008787    | 0.95205 | 0.974325  | no |
| Psmc3   | 59.975  | 60.9581 | 0.0234562   | 0.8762  | 0.930614  | no |
| Psmc4   | 119.614 | 113.418 | -0.0767387  | 0.5924  | 0.73357   | no |
| Psmc5   | 24.7908 | 24.3798 | -0.024121   | 0.8723  | 0.92833   | no |
| Psmc6   | 68.1139 | 65.6221 | -0.0537675  | 0.7189  | 0.828972  | no |
| Psmc7   | 44.1117 | 44.4368 | 0.0105922   | 0.94145 | 0.968284  | no |
| Psmc8   | 142.808 | 130.717 | -0.127625   | 0.36885 | 0.527403  | no |
| Psmc9   | 10.8686 | 10.8115 | -0.00760009 | 0.9639  | 0.980433  | no |
| Psmc1   | 374.811 | 376.95  | 0.00820976  | 0.9537  | 0.975156  | no |
| Psmc2   | 295.933 | 296.684 | 0.00365568  | 0.9799  | 0.988598  | no |
| Psmc2b  | 22.2799 | 24.4783 | 0.135762    | 0.71445 | 0.826014  | no |
| Psmc3   | 66.414  | 69.2071 | 0.0594308   | 0.67405 | 0.797222  | no |
| Psmc4   | 19.6447 | 18.7066 | -0.0705963  | 0.62255 | 0.757849  | no |
| Psmf1   | 13.7226 | 13.5604 | -0.0171515  | 0.9116  | 0.951475  | no |
| Psmg1   | 15.9746 | 18.8917 | 0.241973    | 0.1924  | 0.326066  | no |
| Psmg2   | 35.2368 | 44.0757 | 0.3229      | 0.0419  | 0.0936534 | no |
| Psmg3   | 19.5556 | 17.2147 | -0.183939   | 0.3342  | 0.490161  | no |
| Psmg4   | 39.7616 | 40.4969 | 0.0264384   | 0.8926  | 0.939914  | no |
| Pspc1   | 19.1546 | 18.4155 | -0.0567723  | 0.7132  | 0.82519   | no |
| Psph    | 24.1821 | 23.4819 | -0.0423891  | 0.79255 | 0.878976  | no |
| Psrc1   | 3.39852 | 2.53636 | -0.422147   | 0.09145 | 0.179557  | no |
| Pstk    | 26.7413 | 28.9026 | 0.11213     | 0.4961  | 0.650693  | no |
| Pstpip1 | 133.19  | 141.047 | 0.0826895   | 0.55515 | 0.702303  | no |
| Ptar1   | 7.12792 | 6.69838 | -0.089669   | 0.632   | 0.765445  | no |
| Ptbp1   | 152.665 | 150.741 | -0.0182937  | 0.90475 | 0.94752   | no |
| Ptbp2   | 9.41892 | 8.67096 | -0.11937    | 0.46005 | 0.617312  | no |
| Ptbp3   | 75.5993 | 65.5993 | -0.204693   | 0.1424  | 0.256459  | no |
| Ptcd1   | 16.2377 | 16.4496 | 0.0187098   | 0.92385 | 0.958492  | no |
| Ptcd2   | 33.244  | 32.1715 | -0.0473082  | 0.7599  | 0.857177  | no |
| Ptcd3   | 19.1    | 19.3501 | 0.0187675   | 0.90495 | 0.947673  | no |
| Ptch1   | 6.78357 | 7.3915  | 0.123824    | 0.43985 | 0.597857  | no |

|         |          |          |             |          |             |     |
|---------|----------|----------|-------------|----------|-------------|-----|
| Ptdss1  | 28.914   | 28.9177  | 0.000183118 | 0.99875  | 0.998948    | no  |
| Ptdss2  | 5.75837  | 6.87547  | 0.255796    | 0.17445  | 0.301561    | no  |
| Pten    | 21.0428  | 25.1383  | 0.256557    | 0.0678   | 0.140008    | no  |
| Ptger1  | 51.6846  | 49.9981  | -0.0478615  | 0.8651   | 0.923927    | no  |
| Ptger2  | 0.531842 | 1.16962  | 1.13698     | 6.00E-04 | 0.00228064  | yes |
| Ptger4  | 25.0064  | 18.9936  | -0.396783   | 0.0068   | 0.0195677   | yes |
| Ptges2  | 7.22736  | 6.96764  | -0.0527992  | 0.77155  | 0.865023    | no  |
| Ptges3  | 49.581   | 47.942   | -0.0484997  | 0.7388   | 0.843077    | no  |
| Ptges3l | 1.33785  | 1.6738   | 0.323211    | 0.6728   | 0.796357    | no  |
| Ptgr1   | 1.33844  | 0.463158 | -1.53097    | 4.00E-04 | 0.00158415  | yes |
| Ptgr2   | 13.016   | 13.7547  | 0.0796404   | 0.61265  | 0.749884    | no  |
| Ptk2b   | 200.102  | 84.4987  | -1.24374    | 5.00E-05 | 0.000236281 | yes |
| Ptma    | 918.617  | 838.787  | -0.131158   | 0.37545  | 0.534178    | no  |
| Ptms    | 98.8141  | 67.7532  | -0.544427   | 0.00025  | 0.00103712  | yes |
| Ptov1   | 1.46086  | 1.79885  | 0.300256    | 0.30395  | 0.456727    | no  |
| Ptp4a1  | 5.76616  | 7.45437  | 0.370476    | 0.32135  | 0.476252    | no  |
| Ptp4a2  | 146.777  | 130.408  | -0.170593   | 0.2285   | 0.371604    | no  |
| Ptp4a3  | 51.6076  | 40.1883  | -0.36081    | 0.0122   | 0.0325386   | yes |
| Ptplad1 | 19.9809  | 22.8539  | 0.193822    | 0.1939   | 0.328056    | no  |
| Ptplb   | 4.70277  | 4.13278  | -0.186395   | 0.30185  | 0.454413    | no  |
| Ptpmt1  | 10.5664  | 11.7767  | 0.156452    | 0.40715  | 0.565954    | no  |
| Ptpn1   | 52.6438  | 48.7458  | -0.110986   | 0.4313   | 0.589516    | no  |
| Ptpn11  | 23.9018  | 24.633   | 0.0434733   | 0.76015  | 0.857308    | no  |
| Ptpn12  | 31.5759  | 22.0271  | -0.519548   | 3.00E-04 | 0.00122185  | yes |
| Ptpn13  | 6.20231  | 6.63386  | 0.0970428   | 0.51875  | 0.671098    | no  |
| Ptpn18  | 110.034  | 102.528  | -0.10192    | 0.47705  | 0.63313     | no  |
| Ptpn2   | 68.4669  | 61.0526  | -0.165355   | 0.2782   | 0.427574    | no  |
| Ptpn21  | 1.33574  | 1.70115  | 0.348872    | 0.0944   | 0.184293    | no  |
| Ptpn22  | 202.054  | 196.205  | -0.0423819  | 0.76935  | 0.863448    | no  |
| Ptpn23  | 9.07714  | 8.83156  | -0.039571   | 0.7936   | 0.879656    | no  |
| Ptpn3   | 1.05366  | 1.54216  | 0.549543    | 0.0106   | 0.0288545   | yes |
| Ptpn4   | 18.5962  | 16.8605  | -0.141358   | 0.3282   | 0.483723    | no  |
| Ptpn6   | 334.333  | 285.127  | -0.229683   | 0.11125  | 0.210895    | no  |
| Ptpn7   | 55.617   | 56.0851  | 0.0120915   | 0.9307   | 0.962092    | no  |
| Ptpn9   | 9.46975  | 9.46484  | -0.00074747 | 0.99755  | 0.998087    | no  |
| Ptpra   | 35.5319  | 36.5489  | 0.040713    | 0.7764   | 0.868254    | no  |
| Ptprc   | 839.057  | 741.407  | -0.178502   | 0.38035  | 0.539355    | no  |
| Ptprcap | 703.071  | 678.779  | -0.0507285  | 0.7255   | 0.8336      | no  |
| Ptpre   | 10.9557  | 10.0693  | -0.121717   | 0.46025  | 0.617499    | no  |
| Ptprj   | 8.70254  | 10.0162  | 0.202825    | 0.1667   | 0.291087    | no  |
| Ptprs   | 3.1332   | 3.94076  | 0.330836    | 0.05135  | 0.111205    | no  |
| Ptprv   | 2.94577  | 3.1757   | 0.108432    | 0.5318   | 0.682439    | no  |
| Ptrh1   | 3.70817  | 4.20753  | 0.182265    | 0.5455   | 0.694076    | no  |
| Ptrh2   | 6.36963  | 6.08819  | -0.065197   | 0.71105  | 0.823756    | no  |
| Ptrhd1  | 2.45259  | 2.36872  | -0.0501975  | 0.92275  | 0.95797     | no  |
| Pts     | 46.7131  | 50.0024  | 0.0981676   | 0.526    | 0.677422    | no  |
| Pttg1   | 86.1607  | 89.7203  | 0.0584044   | 0.7058   | 0.820029    | no  |
| Pttg1ip | 44.9872  | 41.8763  | -0.10338    | 0.46755  | 0.624314    | no  |
| Puf60   | 116.545  | 113.276  | -0.0410501  | 0.773    | 0.865892    | no  |
| Pum1    | 25.0874  | 26.6541  | 0.0873906   | 0.55     | 0.69804     | no  |
| Pum2    | 59.9875  | 58.032   | -0.047811   | 0.74225  | 0.845387    | no  |
| Pura    | 12.2333  | 14.5877  | 0.253942    | 0.1446   | 0.259382    | no  |
| Purb    | 29.266   | 29.1302  | -0.00671313 | 0.9609   | 0.97893     | no  |
| Purg    | 2.07233  | 1.82654  | -0.182134   | 0.5671   | 0.712238    | no  |
| Pus1    | 22.5699  | 25.1071  | 0.153693    | 0.3335   | 0.489388    | no  |
| Pus10   | 9.51109  | 9.74484  | 0.0350268   | 0.8662   | 0.924556    | no  |
| Pus3    | 15.0673  | 15.4336  | 0.0346516   | 0.8548   | 0.917841    | no  |

|           |         |         |             |          |             |     |
|-----------|---------|---------|-------------|----------|-------------|-----|
| Pus7      | 3.31608 | 4.75751 | 0.520727    | 0.0045   | 0.0136593   | yes |
| Pus7l     | 5.5594  | 6.04525 | 0.120872    | 0.50135  | 0.655472    | no  |
| Pusl1     | 9.96043 | 10.6081 | 0.0908867   | 0.82375  | 0.898541    | no  |
| Pvr       | 14.7599 | 12.7828 | -0.207483   | 0.1838   | 0.314527    | no  |
| Pwp1      | 14.9477 | 14.4832 | -0.0455484  | 0.771    | 0.864626    | no  |
| Pwp2      | 7.35231 | 8.99271 | 0.290559    | 0.07065  | 0.144922    | no  |
| Pwvp2a    | 11.3418 | 12.1543 | 0.0998155   | 0.51885  | 0.671141    | no  |
| Pxk       | 26.1817 | 24.6438 | -0.087337   | 0.5534   | 0.700969    | no  |
| Pxmp2     | 3.22267 | 2.80882 | -0.198292   | 0.52225  | 0.674192    | no  |
| Pxmp4     | 15.0297 | 12.0982 | -0.31302    | 0.07445  | 0.151222    | no  |
| Pxn       | 45.3013 | 43.1332 | -0.0707538  | 0.62295  | 0.7581      | no  |
| Pycard    | 151.934 | 113.561 | -0.41998    | 0.00295  | 0.00941349  | yes |
| Pycr2     | 29.8266 | 32.6172 | 0.129035    | 0.39775  | 0.556825    | no  |
| Pyctl     | 14.9554 | 12.8442 | -0.219557   | 0.2153   | 0.355685    | no  |
| Pydc3     | 55.4551 | 57.1068 | 0.0423429   | 0.76085  | 0.857796    | no  |
| Pydc4     | 13.9922 | 14.5872 | 0.0600861   | 0.6998   | 0.815802    | no  |
| Pygb      | 37.6312 | 36.6749 | -0.037139   | 0.795    | 0.880586    | no  |
| Pygm      | 1.32159 | 1.56329 | 0.242302    | 0.35915  | 0.517052    | no  |
| Pygo2     | 23.1601 | 24.6217 | 0.0882915   | 0.54645  | 0.694959    | no  |
| Pyhin1    | 89.8588 | 91.8199 | 0.031147    | 0.8234   | 0.898312    | no  |
| Pyroxd1   | 6.89752 | 6.87539 | -0.00463758 | 0.9898   | 0.993841    | no  |
| Pyurf     | 1.31681 | 1.4377  | 0.126715    | 0.5626   | 0.708528    | no  |
| Qars      | 75.7734 | 71.6559 | -0.080606   | 0.56645  | 0.711713    | no  |
| Qdpr      | 38.9801 | 31.9099 | -0.288734   | 0.0585   | 0.124212    | no  |
| Qk        | 13.6758 | 13.8484 | 0.0180978   | 0.90355  | 0.946769    | no  |
| Qpct      | 1.51451 | 3.31866 | 1.13175     | 1.00E-04 | 0.000450026 | yes |
| Qpctl     | 5.5704  | 6.3066  | 0.179081    | 0.34705  | 0.504147    | no  |
| Qprt      | 13.6194 | 10.2812 | -0.405658   | 0.0328   | 0.0760742   | no  |
| Qrich1    | 40.8302 | 40.5972 | -0.00825683 | 0.95455  | 0.9757      | no  |
| Qrsl1     | 10.7231 | 10.6587 | -0.00868502 | 0.95985  | 0.978369    | no  |
| Qsox1     | 26.1865 | 27.1233 | 0.0507071   | 0.73265  | 0.83858     | no  |
| Qsox2     | 2.99576 | 3.59235 | 0.262005    | 0.2247   | 0.367158    | no  |
| Qtrt1     | 15.3473 | 19.5363 | 0.348173    | 0.0452   | 0.0998906   | no  |
| Qtrtd1    | 3.31452 | 4.70641 | 0.505826    | 0.01255  | 0.0333435   | yes |
| R3hcc1    | 12.0603 | 12.3105 | 0.0296287   | 0.86445  | 0.923526    | no  |
| R3hcc1l   | 10.9301 | 11.2685 | 0.0439951   | 0.784    | 0.873391    | no  |
| R3hdm1    | 15.7567 | 15.6615 | -0.00874136 | 0.9537   | 0.975156    | no  |
| R3hdm2    | 23.3586 | 22.6043 | -0.0473551  | 0.74025  | 0.843872    | no  |
| R3hdm4    | 88.5386 | 88.0507 | -0.00797172 | 0.95735  | 0.977108    | no  |
| Rab1      | 43.8217 | 37.1814 | -0.237065   | 0.1007   | 0.194372    | no  |
| Rab10     | 61.2989 | 60.0983 | -0.0285371  | 0.8447   | 0.911421    | no  |
| Rab11a    | 27.6072 | 25.5986 | -0.108979   | 0.46655  | 0.623415    | no  |
| Rab11b    | 32.633  | 30.1878 | -0.11237    | 0.4257   | 0.584124    | no  |
| Rab11fip1 | 5.67548 | 7.45879 | 0.3942      | 0.01345  | 0.0353818   | yes |
| Rab11fip2 | 4.14014 | 4.75098 | 0.198546    | 0.22555  | 0.368181    | no  |
| Rab11fip3 | 2.39506 | 2.67686 | 0.160477    | 0.39765  | 0.556729    | no  |
| Rab11fip4 | 26.7982 | 25.5432 | -0.0691966  | 0.63865  | 0.770603    | no  |
| Rab12     | 10.1849 | 10.0648 | -0.0171105  | 0.92175  | 0.957467    | no  |
| Rab14     | 45.7575 | 41.5527 | -0.139065   | 0.3345   | 0.490509    | no  |
| Rab18     | 24.2997 | 23.5863 | -0.0429867  | 0.76415  | 0.860034    | no  |
| Rab19     | 47.3697 | 49.5772 | 0.0657112   | 0.6636   | 0.789572    | no  |
| Rab1b     | 135.757 | 130.166 | -0.0606731  | 0.6641   | 0.789874    | no  |
| Rab20     | 3.31486 | 3.54636 | 0.0973928   | 0.78265  | 0.872451    | no  |
| Rab21     | 50.2239 | 51.2719 | 0.0297929   | 0.841    | 0.909041    | no  |
| Rab22a    | 22.7379 | 22.2558 | -0.0309183  | 0.8392   | 0.907818    | no  |
| Rab23     | 2.04789 | 2.02089 | -0.0191496  | 0.92495  | 0.958971    | no  |
| Rab24     | 29.5225 | 29.6527 | 0.00634833  | 0.96545  | 0.981181    | no  |

|          |         |          |            |          |             |     |
|----------|---------|----------|------------|----------|-------------|-----|
| Rab27a   | 56.071  | 54.809   | -0.0328437 | 0.81765  | 0.894764    | no  |
| Rab28    | 14.4165 | 17.8037  | 0.304456   | 0.0689   | 0.14193     | no  |
| Rab2a    | 50.1245 | 42.5715  | -0.235629  | 0.1063   | 0.203198    | no  |
| Rab2b    | 7.44902 | 5.98376  | -0.315999  | 0.49735  | 0.651763    | no  |
| Rab31    | 2.39547 | 2.65087  | 0.146157   | 0.48465  | 0.640016    | no  |
| Rab32    | 1.26287 | 2.00129  | 0.66422    | 0.0246   | 0.0597062   | no  |
| Rab33b   | 16.1612 | 12.405   | -0.381611  | 0.0127   | 0.0336825   | yes |
| Rab35    | 77.1419 | 70.7723  | -0.124329  | 0.3804   | 0.539404    | no  |
| Rab37    | 50.0141 | 46.4876  | -0.105489  | 0.45535  | 0.613022    | no  |
| Rab39b   | 1.04118 | 1.05409  | 0.0177745  | 0.94565  | 0.970482    | no  |
| Rab3a    | 1.83612 | 1.85114  | 0.0117543  | 0.9854   | 0.991539    | no  |
| Rab3d    | 5.97888 | 5.51903  | -0.11546   | 0.49695  | 0.651396    | no  |
| Rab3gap1 | 19.3459 | 19.9288  | 0.0428279  | 0.76835  | 0.862724    | no  |
| Rab3gap2 | 8.42452 | 8.55157  | 0.0215942  | 0.92595  | 0.959669    | no  |
| Rab3ip   | 6.71068 | 6.47357  | -0.0518972 | 0.76925  | 0.863377    | no  |
| Rab40c   | 9.20997 | 9.49394  | 0.0438103  | 0.7978   | 0.882247    | no  |
| Rab43    | 18.9989 | 18.821   | -0.0135727 | 0.92805  | 0.960717    | no  |
| Rab4a    | 3.21378 | 11.2043  | 1.80171    | 5.00E-05 | 0.000236281 | yes |
| Rab4b    | 78.2679 | 77.2904  | -0.0181304 | 0.9004   | 0.944896    | no  |
| Rab5a    | 37.6864 | 34.156   | -0.141904  | 0.3416   | 0.498157    | no  |
| Rab5b    | 28.346  | 27.7985  | -0.0281397 | 0.84815  | 0.913356    | no  |
| Rab5c    | 143.972 | 128.614  | -0.162736  | 0.2488   | 0.394182    | no  |
| Rab6a    | 32.9543 | 30.0207  | -0.134506  | 0.4063   | 0.565285    | no  |
| Rab6b    | 1.49899 | 2.07624  | 0.469985   | 0.02985  | 0.0702924   | no  |
| Rab7     | 215.35  | 209.633  | -0.0388182 | 0.7922   | 0.878781    | no  |
| Rab7l1   | 34.628  | 29.4736  | -0.232517  | 0.1472   | 0.26311     | no  |
| Rab8a    | 195.306 | 199.362  | 0.02965    | 0.8341   | 0.904922    | no  |
| Rab8b    | 65.6002 | 59.8009  | -0.133532  | 0.34665  | 0.503711    | no  |
| Rab9     | 15.8409 | 15.3963  | -0.0410684 | 0.80735  | 0.888368    | no  |
| Rabac1   | 105.721 | 112.024  | 0.0835508  | 0.56845  | 0.713362    | no  |
| Rabep1   | 9.03746 | 8.17885  | -0.14402   | 0.5629   | 0.708779    | no  |
| Rabep2   | 30.9074 | 29.039   | -0.0899628 | 0.54925  | 0.697439    | no  |
| Rabepk   | 9.64517 | 10.4965  | 0.122035   | 0.48655  | 0.641732    | no  |
| Rabgap1  | 8.88428 | 8.89416  | 0.001602   | 0.99255  | 0.995342    | no  |
| Rabgap1l | 28.7004 | 33.5529  | 0.225363   | 0.13695  | 0.249161    | no  |
| Rabgef1  | 10.2883 | 9.81156  | -0.0684527 | 0.67535  | 0.798238    | no  |
| Rabggtta | 21.1039 | 21.3166  | 0.01447    | 0.924    | 0.958591    | no  |
| Rabggtb  | 33.1138 | 38.5222  | 0.218256   | 0.16115  | 0.283224    | no  |
| Rabif    | 30.9425 | 27.3386  | -0.178648  | 0.2413   | 0.385894    | no  |
| Rabl3    | 3.966   | 3.78024  | -0.0692066 | 0.75285  | 0.852262    | no  |
| Rabl6    | 22.0316 | 22.2382  | 0.013462   | 0.9261   | 0.95974     | no  |
| Rac1     | 190.984 | 173.858  | -0.135542  | 0.3441   | 0.500944    | no  |
| Rac2     | 753.949 | 668.406  | -0.173742  | 0.2955   | 0.447047    | no  |
| Rac3     | 1.08274 | 0.639984 | -0.758575  | 0.1409   | 0.254348    | no  |
| Racgap1  | 138.157 | 93.6978  | -0.560227  | 5.00E-05 | 0.000236281 | yes |
| Rad1     | 13.8196 | 14.6172  | 0.0809475  | 0.66715  | 0.792194    | no  |
| Rad17    | 15.2175 | 15.0276  | -0.0181157 | 0.90565  | 0.947998    | no  |
| Rad18    | 5.44418 | 5.01456  | -0.118591  | 0.52455  | 0.676234    | no  |
| Rad21    | 108.615 | 87.7515  | -0.307733  | 0.03295  | 0.0763493   | no  |
| Rad23a   | 41.5208 | 40.5849  | -0.0328929 | 0.8502   | 0.914573    | no  |
| Rad23b   | 35.1929 | 37.9714  | 0.109627   | 0.4341   | 0.592357    | no  |
| Rad50    | 8.76951 | 8.40682  | -0.0609346 | 0.69855  | 0.815067    | no  |
| Rad51    | 14.6261 | 7.90843  | -0.887085  | 5.00E-05 | 0.000236281 | yes |
| Rad51ap1 | 8.9599  | 4.53158  | -0.983469  | 5.00E-05 | 0.000236281 | yes |
| Rad51c   | 2.38257 | 1.2714   | -0.906101  | 0.00075  | 0.00278555  | yes |
| Rad51d   | 8.97284 | 9.25896  | 0.0452851  | 0.8264   | 0.900347    | no  |
| Rad52    | 11.8212 | 11.684   | -0.016844  | 0.9246   | 0.958829    | no  |

|          |         |          |             |          |             |     |
|----------|---------|----------|-------------|----------|-------------|-----|
| Rad54b   | 2.68916 | 1.35453  | -0.989361   | 0.00035  | 0.0014053   | yes |
| Rad54l   | 6.03042 | 3.73947  | -0.689423   | 0.0569   | 0.121351    | no  |
| Rad54l2  | 9.75429 | 8.83493  | -0.142819   | 0.3278   | 0.483366    | no  |
| Rad9a    | 51.8492 | 48.6304  | -0.0924621  | 0.8272   | 0.900787    | no  |
| Rad9b    | 2.08726 | 2.69635  | 0.369395    | 0.19245  | 0.326142    | no  |
| Rae1     | 50.6873 | 53.2038  | 0.0699033   | 0.6229   | 0.758052    | no  |
| Raf1     | 73.3069 | 78.5106  | 0.0989378   | 0.5103   | 0.66362     | no  |
| Rai1     | 11.5918 | 14.0597  | 0.278469    | 0.2055   | 0.343166    | no  |
| Rala     | 19.2708 | 18.1306  | -0.0879847  | 0.5658   | 0.711238    | no  |
| Ralb     | 2.21822 | 4.18838  | 0.916987    | 2.00E-04 | 0.0008488   | yes |
| Ralbp1   | 33.696  | 31.3635  | -0.103488   | 0.4657   | 0.62268     | no  |
| Ralgapa1 | 12.7825 | 14.4049  | 0.172389    | 0.23055  | 0.374016    | no  |
| Ralgapa2 | 9.88788 | 9.75994  | -0.0187886  | 0.8989   | 0.944041    | no  |
| Ralgapb  | 22.7731 | 22.9232  | 0.00947813  | 0.9432   | 0.969222    | no  |
| Ralgds   | 4.45308 | 7.37832  | 0.728488    | 5.00E-05 | 0.000236281 | yes |
| Raly     | 270.838 | 254.715  | -0.0885444  | 0.5402   | 0.68972     | no  |
| Ran      | 142.518 | 122.876  | -0.213946   | 0.1312   | 0.240848    | no  |
| Ranbp1   | 91.8496 | 82.1755  | -0.160566   | 0.28265  | 0.432614    | no  |
| Ranbp10  | 22.1634 | 32.9945  | 0.574049    | 1.00E-04 | 0.000450026 | yes |
| Ranbp2   | 25.4591 | 25.5084  | 0.00279225  | 0.98535  | 0.991539    | no  |
| Ranbp3   | 39.8108 | 38.6887  | -0.0412452  | 0.78005  | 0.870653    | no  |
| Ranbp6   | 9.0544  | 9.13721  | 0.013136    | 0.9342   | 0.964269    | no  |
| Ranbp9   | 56.2532 | 57.9999  | 0.0441171   | 0.8201   | 0.896347    | no  |
| Rangap1  | 64.3221 | 62.8581  | -0.0332151  | 0.8139   | 0.892306    | no  |
| Rangrf   | 4.59811 | 6.16584  | 0.423258    | 0.2181   | 0.359009    | no  |
| Rap1a    | 99.5566 | 95.9879  | -0.052664   | 0.7093   | 0.822552    | no  |
| Rap1b    | 576.063 | 421.349  | -0.451213   | 0.0027   | 0.00870467  | yes |
| Rap1gap2 | 51.9213 | 41.4481  | -0.325022   | 0.0227   | 0.0556652   | no  |
| Rap1gds1 | 47.2728 | 44.068   | -0.101279   | 0.47775  | 0.633845    | no  |
| Rap2a    | 16.8854 | 10.3209  | -0.710203   | 5.00E-05 | 0.000236281 | yes |
| Rap2b    | 23.5644 | 19.6763  | -0.260153   | 0.0721   | 0.147378    | no  |
| Rap2c    | 35.7175 | 33.5999  | -0.0881723  | 0.5298   | 0.680875    | no  |
| Rapgef1  | 60.2795 | 55.4149  | -0.121395   | 0.38495  | 0.543955    | no  |
| Rapgef2  | 13.243  | 14.9906  | 0.178826    | 0.2147   | 0.354919    | no  |
| Rapgef4  | 3.83633 | 5.3406   | 0.477276    | 0.00685  | 0.0196859   | yes |
| Rapgef6  | 32.8007 | 38.065   | 0.214738    | 0.1258   | 0.232923    | no  |
| Raph1    | 2.86905 | 3.79381  | 0.403075    | 0.01285  | 0.0340304   | yes |
| Rara     | 41.7014 | 51.5346  | 0.305446    | 0.02975  | 0.0701013   | no  |
| Rarg     | 7.80677 | 9.79665  | 0.327563    | 0.05645  | 0.120577    | no  |
| Rarres2  | 1.52124 | 1.28303  | -0.245695   | 0.85885  | 0.920092    | no  |
| Rars     | 28.4919 | 28.4443  | -0.00241359 | 0.987    | 0.99247     | no  |
| Rars2    | 13.4685 | 14.0459  | 0.0605628   | 0.7201   | 0.829963    | no  |
| Rasa1    | 33.371  | 29.7256  | -0.166892   | 0.2327   | 0.376526    | no  |
| Rasa2    | 6.985   | 8.62395  | 0.30409     | 0.04985  | 0.108516    | no  |
| Rasa3    | 212.225 | 222.976  | 0.0712931   | 0.6263   | 0.76076     | no  |
| Rasa4    | 2.44185 | 2.56961  | 0.0735749   | 0.7376   | 0.842198    | no  |
| Rasal1   | 9.08325 | 8.06996  | -0.170647   | 0.29335  | 0.444681    | no  |
| Rasal3   | 193.533 | 204.854  | 0.0820169   | 0.5907   | 0.732133    | no  |
| Rasd1    | 2.57862 | 2.69485  | 0.0636028   | 0.88235  | 0.934191    | no  |
| Rasgrp1  | 58.7191 | 64.7225  | 0.140436    | 0.32145  | 0.476301    | no  |
| Rasgrp2  | 282.245 | 260.498  | -0.115678   | 0.4191   | 0.57773     | no  |
| Rasgrp4  | 1.65243 | 1.4477   | -0.190829   | 0.59355  | 0.734543    | no  |
| Rasl11a  | 2.55539 | 3.18488  | 0.317695    | 0.2914   | 0.44238     | no  |
| Rasl11b  | 6.35237 | 4.90748  | -0.372313   | 0.0769   | 0.155412    | no  |
| Rasl12   | 1.57157 | 0.694792 | -1.17755    | 0.0014   | 0.00485767  | yes |
| Rassf1   | 59.2136 | 57.486   | -0.0427185  | 0.76405  | 0.859975    | no  |
| Rassf2   | 41.8085 | 49.1225  | 0.232588    | 0.10175  | 0.19605     | no  |

|            |         |          |             |         |           |    |
|------------|---------|----------|-------------|---------|-----------|----|
| Rassf3     | 9.88822 | 10.887   | 0.138821    | 0.3798  | 0.538781  | no |
| Rassf5     | 120.25  | 120.11   | -0.0016748  | 0.9899  | 0.993885  | no |
| Rassf7     | 5.30781 | 6.34229  | 0.256886    | 0.2299  | 0.373244  | no |
| Raver1     | 54.5269 | 52.6363  | -0.0509086  | 0.72775 | 0.835057  | no |
| Raver2     | 2.12115 | 2.87006  | 0.436238    | 0.8413  | 0.90924   | no |
| Rb1        | 19.5369 | 18.03    | -0.115803   | 0.544   | 0.692929  | no |
| Rb1cc1     | 12.9069 | 12.0229  | -0.102353   | 0.47515 | 0.631452  | no |
| Rbak       | 6.45093 | 6.93486  | 0.104359    | 0.53705 | 0.687165  | no |
| Rbbp4      | 53.7219 | 50.2998  | -0.0949596  | 0.505   | 0.658998  | no |
| Rbbp5      | 19.6602 | 19.6727  | 0.000918412 | 0.99435 | 0.99634   | no |
| Rbbp6      | 26.8952 | 28.871   | 0.102268    | 0.48605 | 0.641325  | no |
| Rbbp7      | 77.7027 | 65.2979  | -0.250928   | 0.15895 | 0.280125  | no |
| Rbbp8      | 12.8826 | 11.1336  | -0.210509   | 0.17125 | 0.297274  | no |
| Rbbp9      | 1.50528 | 1.8112   | 0.266907    | 0.3405  | 0.496964  | no |
| Rbck1      | 125.706 | 125.902  | 0.00224608  | 0.98825 | 0.993076  | no |
| Rbfa       | 41.0502 | 40.4597  | -0.0209035  | 0.89285 | 0.940051  | no |
| Rbks       | 7.60316 | 7.81441  | 0.0395386   | 0.8562  | 0.918508  | no |
| Rbl1       | 22.9996 | 20.1883  | -0.188088   | 0.21395 | 0.354052  | no |
| Rbl2       | 53.9566 | 58.2264  | 0.109874    | 0.4407  | 0.598585  | no |
| Rbm10      | 37.084  | 36.6487  | -0.0170329  | 0.932   | 0.962815  | no |
| Rbm12      | 12.4031 | 12.4243  | 0.00246836  | 0.9943  | 0.996304  | no |
| Rbm12b1    | 3.6354  | 3.57889  | -0.0226018  | 0.90565 | 0.947998  | no |
| Rbm12b2    | 4.94519 | 4.95189  | 0.00195533  | 0.99485 | 0.996573  | no |
| Rbm14      | 19.9024 | 18.3581  | -0.116526   | 0.51215 | 0.665278  | no |
| Rbm14-rbm4 | 1.61682 | 0.107258 | -3.914      | 0.18115 | 0.310934  | no |
| Rbm15      | 10.8502 | 10.9875  | 0.0181318   | 0.90845 | 0.949549  | no |
| Rbm15b     | 16.4118 | 17.2486  | 0.0717469   | 0.63885 | 0.770726  | no |
| Rbm17      | 78.0957 | 75.6385  | -0.0461225  | 0.7446  | 0.847025  | no |
| Rbm18      | 19.9383 | 20.2985  | 0.0258329   | 0.88105 | 0.933335  | no |
| Rbm19      | 7.32436 | 8.23063  | 0.1683      | 0.3049  | 0.457687  | no |
| Rbm22      | 58.8907 | 57.7758  | -0.0275751  | 0.8447  | 0.911421  | no |
| Rbm25      | 50.0444 | 47.367   | -0.079326   | 0.5744  | 0.718415  | no |
| Rbm26      | 13.4357 | 14.4634  | 0.106331    | 0.5387  | 0.688377  | no |
| Rbm27      | 14.5818 | 14.0344  | -0.0551933  | 0.7002  | 0.816048  | no |
| Rbm28      | 26.5289 | 25.3956  | -0.0629832  | 0.65995 | 0.78702   | no |
| Rbm3       | 508.094 | 453.842  | -0.162906   | 0.25925 | 0.404867  | no |
| Rbm33      | 24.2084 | 24.6829  | 0.0280073   | 0.84515 | 0.91164   | no |
| Rbm34      | 10.4957 | 11.6697  | 0.152965    | 0.32925 | 0.484866  | no |
| Rbm38      | 80.7202 | 71.7995  | -0.168954   | 0.23665 | 0.381257  | no |
| Rbm39      | 218.491 | 220.657  | 0.0142327   | 0.9217  | 0.95743   | no |
| Rbm4       | 9.28822 | 9.71707  | 0.0651184   | 0.83765 | 0.907003  | no |
| Rbm41      | 5.59976 | 5.86314  | 0.0663089   | 0.67765 | 0.800018  | no |
| Rbm42      | 80.863  | 81.2382  | 0.00667934  | 0.96175 | 0.979528  | no |
| Rbm43      | 27.3376 | 27.6473  | 0.0162482   | 0.9127  | 0.952173  | no |
| Rbm45      | 31.8283 | 29.6539  | -0.102088   | 0.49375 | 0.648466  | no |
| Rbm48      | 9.76958 | 9.19924  | -0.0867813  | 0.6683  | 0.793066  | no |
| Rbm4b      | 7.57014 | 6.87638  | -0.138672   | 0.46775 | 0.624463  | no |
| Rbm5       | 74.8502 | 83.9009  | 0.164679    | 0.24275 | 0.387511  | no |
| Rbm6       | 31.8155 | 31.4572  | -0.0163421  | 0.9113  | 0.951289  | no |
| Rbm7       | 38.5298 | 33.6296  | -0.196241   | 0.1826  | 0.312913  | no |
| Rbm8a      | 29.2659 | 28.2365  | -0.0516595  | 0.7235  | 0.832197  | no |
| Rbms1      | 67.7854 | 61.0424  | -0.151163   | 0.2825  | 0.43246   | no |
| Rbms2      | 7.33012 | 6.25229  | -0.229453   | 0.14245 | 0.256492  | no |
| Rbmx       | 26.3387 | 25.1736  | -0.0652755  | 0.66575 | 0.791197  | no |
| Rbmx2      | 7.22735 | 6.96702  | -0.0529249  | 0.7833  | 0.872886  | no |
| Rbmx11     | 38.5921 | 34.7136  | -0.152807   | 0.3101  | 0.46362   | no |
| Rbpj       | 10.3969 | 12.9949  | 0.321794    | 0.0297  | 0.0700139 | no |

|        |          |         |            |          |             |     |
|--------|----------|---------|------------|----------|-------------|-----|
| Rbpms  | 0.124776 | 1.22906 | 3.30014    | 0.00015  | 0.000653255 | yes |
| Rbx1   | 52.2872  | 47.8636 | -0.127529  | 0.37585  | 0.534596    | no  |
| Rc3h1  | 11.5724  | 11.6017 | 0.0036485  | 0.97945  | 0.988455    | no  |
| Rc3h2  | 6.19725  | 6.52263 | 0.0738268  | 0.6203   | 0.756088    | no  |
| Rcan1  | 2.98545  | 3.01116 | 0.0123704  | 0.95555  | 0.976242    | no  |
| Rcan3  | 3.97004  | 3.58555 | -0.146961  | 0.3942   | 0.553337    | no  |
| Rcbtb1 | 20.7079  | 19.9205 | -0.0559275 | 0.69795  | 0.814691    | no  |
| Rcbtb2 | 18.7663  | 16.4238 | -0.192355  | 0.1918   | 0.325314    | no  |
| Rcc1   | 17.0777  | 14.5111 | -0.23496   | 0.13675  | 0.248855    | no  |
| Rcc2   | 32.9044  | 34.2269 | 0.056851   | 0.6893   | 0.808484    | no  |
| Rccd1  | 5.28209  | 6.45032 | 0.288262   | 0.1261   | 0.233282    | no  |
| Rce1   | 21.5426  | 21.3158 | -0.0152711 | 0.9292   | 0.961287    | no  |
| Rchy1  | 49.2433  | 45.7597 | -0.10585   | 0.4932   | 0.647937    | no  |
| Rcl1   | 10.3997  | 12.9932 | 0.321218   | 0.06545  | 0.136078    | no  |
| Rcn1   | 18.8015  | 21.7967 | 0.213264   | 0.152    | 0.270102    | no  |
| Rcn2   | 14.3502  | 14.0038 | -0.0352442 | 0.8282   | 0.901292    | no  |
| Rcn3   | 33.7488  | 0.29079 | -6.85872   | 5.00E-05 | 0.000236281 | yes |
| Rcor1  | 18.5764  | 19.9597 | 0.10362    | 0.4936   | 0.648366    | no  |
| Rcor2  | 1.2439   | 1.05679 | -0.235191  | 0.4787   | 0.634628    | no  |
| Rcor3  | 5.69134  | 6.01993 | 0.0809795  | 0.68535  | 0.805619    | no  |
| Rcsd1  | 59.8446  | 88.2567 | 0.560484   | 1.00E-04 | 0.000450026 | yes |
| Rdh10  | 6.78023  | 7.01733 | 0.0495882  | 0.7871   | 0.875545    | no  |
| Rdh11  | 12.3153  | 11.7567 | -0.0669684 | 0.7026   | 0.817617    | no  |
| Rdh12  | 3.40515  | 4.36863 | 0.359461   | 0.1282   | 0.236404    | no  |
| Rdh13  | 3.24849  | 3.98322 | 0.294168   | 0.13785  | 0.250179    | no  |
| Rdh14  | 7.77008  | 8.27426 | 0.0907011  | 0.644    | 0.774701    | no  |
| Rdm1   | 30.8972  | 26.8098 | -0.204717  | 0.21005  | 0.349137    | no  |
| Rdx    | 44.01    | 41.0774 | -0.0994848 | 0.4899   | 0.64491     | no  |
| Reck   | 5.0915   | 5.69042 | 0.160445   | 0.33755  | 0.493812    | no  |
| Recql  | 32.2705  | 29.1485 | -0.146793  | 0.35915  | 0.517052    | no  |
| Recql4 | 1.8936   | 1.08545 | -0.802839  | 0.0039   | 0.0120284   | yes |
| Recql5 | 9.49791  | 9.73243 | 0.0351893  | 0.8258   | 0.900013    | no  |
| Reep3  | 8.13675  | 8.87249 | 0.124886   | 0.4096   | 0.568598    | no  |
| Reep4  | 29.0348  | 28.3788 | -0.0329665 | 0.8304   | 0.902643    | no  |
| Reep5  | 88.821   | 69.1184 | -0.36183   | 0.01075  | 0.0292077   | yes |
| Rel    | 10.3393  | 11.7955 | 0.190103   | 0.24505  | 0.390123    | no  |
| Rela   | 56.6346  | 55.8386 | -0.0204195 | 0.88315  | 0.93462     | no  |
| Relb   | 18.1849  | 20.694  | 0.186471   | 0.2259   | 0.36859     | no  |
| Rel1   | 6.9059   | 9.78185 | 0.502277   | 0.00245  | 0.0079866   | yes |
| Relt   | 15.3379  | 17.4778 | 0.188423   | 0.218    | 0.358911    | no  |
| Repin1 | 1.50218  | 1.84942 | 0.300023   | 0.21375  | 0.353812    | no  |
| Reps1  | 46.7198  | 40.3341 | -0.212036  | 0.1419   | 0.255689    | no  |
| Rer1   | 98.6999  | 94.5828 | -0.0614712 | 0.65775  | 0.785273    | no  |
| Rere   | 10.3767  | 12.4356 | 0.26112    | 0.0701   | 0.143986    | no  |
| Rest   | 6.35078  | 7.91843 | 0.318279   | 0.04925  | 0.107378    | no  |
| Ret    | 2.28312  | 3.18186 | 0.478861   | 0.0059   | 0.0172945   | yes |
| Retsat | 1.53802  | 1.43735 | -0.0976612 | 0.741    | 0.844386    | no  |
| Rev1   | 2.97581  | 2.72655 | -0.126205  | 0.79635  | 0.881431    | no  |
| Rev3l  | 10.2089  | 10.3286 | 0.0168097  | 0.90645  | 0.94854     | no  |
| Rexo1  | 27.6725  | 27.2688 | -0.0212028 | 0.8793   | 0.932391    | no  |
| Rexo2  | 78.4714  | 67.8518 | -0.20978   | 0.15415  | 0.27318     | no  |
| Rexo4  | 39.8037  | 39.2144 | -0.0215192 | 0.8807   | 0.933133    | no  |
| Rfc1   | 18.6157  | 17.7333 | -0.0700581 | 0.6308   | 0.764385    | no  |
| Rfc2   | 49.7673  | 45.8115 | -0.11949   | 0.41775  | 0.576353    | no  |
| Rfc3   | 15.1914  | 10.1504 | -0.581714  | 0.0034   | 0.0106624   | yes |
| Rfc4   | 16.6406  | 12.5099 | -0.411635  | 0.6547   | 0.782942    | no  |
| Rfc5   | 23.4381  | 17.5468 | -0.417646  | 0.0086   | 0.0240265   | yes |



|         |         |          |             |          |             |     |
|---------|---------|----------|-------------|----------|-------------|-----|
| Rfesd   | 5.35959 | 5.34979  | -0.00263888 | 0.9894   | 0.99368     | no  |
| Rffl    | 4.51186 | 4.40884  | -0.0333203  | 0.91425  | 0.953001    | no  |
| Rfk     | 21.5522 | 23.479   | 0.123535    | 0.41745  | 0.576063    | no  |
| Rfng    | 17.8184 | 17.6375  | -0.0147224  | 0.9263   | 0.959764    | no  |
| Rft1    | 6.43547 | 6.73436  | 0.0654953   | 0.72065  | 0.830312    | no  |
| Rftn1   | 33.6392 | 47.4427  | 0.496044    | 0.00065  | 0.00244919  | yes |
| Rfwd2   | 11.6276 | 11.5717  | -0.00695009 | 0.9622   | 0.979811    | no  |
| Rfwd3   | 21.396  | 17.8057  | -0.265      | 0.0661   | 0.137204    | no  |
| Rfx1    | 26.0998 | 38.2322  | 0.550749    | 5.00E-05 | 0.000236281 | yes |
| Rfx2    | 2.43555 | 2.24133  | -0.119895   | 0.5797   | 0.722981    | no  |
| Rfx3    | 3.68448 | 4.57068  | 0.310947    | 0.04505  | 0.0996184   | no  |
| Rfx5    | 8.7039  | 6.99737  | -0.314849   | 0.0511   | 0.110762    | no  |
| Rfx7    | 20.2393 | 20.8272  | 0.0413084   | 0.77195  | 0.865279    | no  |
| Rfxank  | 9.57226 | 9.77772  | 0.0306386   | 0.8843   | 0.935318    | no  |
| Rfxap   | 15.7913 | 15.0292  | -0.0713645  | 0.654    | 0.782569    | no  |
| Rgcc    | 5.3136  | 6.07352  | 0.192844    | 0.4621   | 0.619204    | no  |
| Rgl2    | 43.9176 | 47.6123  | 0.116535    | 0.4121   | 0.570957    | no  |
| Rgp1    | 14.4442 | 15.5697  | 0.108245    | 0.625    | 0.759783    | no  |
| Rgs1    | 75.8724 | 66.7958  | -0.183817   | 0.2076   | 0.345879    | no  |
| Rgs10   | 14.2212 | 19.1856  | 0.431982    | 0.02735  | 0.0653051   | no  |
| Rgs11   | 2.89738 | 3.87327  | 0.418804    | 0.07665  | 0.155013    | no  |
| Rgs14   | 55.6079 | 59.9061  | 0.107413    | 0.45065  | 0.608075    | no  |
| Rgs16   | 1.96924 | 0.895626 | -1.13667    | 8.00E-04 | 0.0029486   | yes |
| Rgs19   | 82.6679 | 90.9348  | 0.137504    | 0.36275  | 0.520992    | no  |
| Rgs2    | 25.6641 | 29.2662  | 0.189486    | 0.19205  | 0.325621    | no  |
| Rgs3    | 70.7825 | 63.3064  | -0.161042   | 0.25585  | 0.400764    | no  |
| Rhbdd1  | 8.46173 | 8.42796  | -0.00576875 | 0.97025  | 0.983869    | no  |
| Rhbdd2  | 2.57999 | 3.01795  | 0.226203    | 0.24445  | 0.389493    | no  |
| Rhbdd3  | 2.0518  | 2.36163  | 0.202898    | 0.45265  | 0.610202    | no  |
| Rhbdf2  | 16.0432 | 15.1678  | -0.0809456  | 0.58755  | 0.7296      | no  |
| Rhbdl1  | 7.01027 | 5.75455  | -0.284767   | 0.1687   | 0.293635    | no  |
| Rheb    | 48.4215 | 42.2186  | -0.19777    | 0.1859   | 0.317382    | no  |
| Rhebl1  | 5.90067 | 5.57523  | -0.0818462  | 0.7229   | 0.831818    | no  |
| Rhoa    | 261.544 | 237.206  | -0.14091    | 0.32985  | 0.485516    | no  |
| Rhob    | 3.82817 | 2.96656  | -0.367861   | 0.1018   | 0.196136    | no  |
| Rhobtb2 | 6.62584 | 8.81106  | 0.411211    | 0.008    | 0.0225529   | yes |
| Rhoc    | 16.8579 | 25.0143  | 0.569329    | 0.0014   | 0.00485767  | yes |
| Rhof    | 91.7092 | 75.5126  | -0.280349   | 0.0494   | 0.107649    | no  |
| Rhog    | 185.756 | 152.647  | -0.283211   | 0.04755  | 0.104226    | no  |
| Rhoh    | 26.3279 | 30.2714  | 0.201363    | 0.1556   | 0.275314    | no  |
| Rhoq    | 3.55378 | 2.9491   | -0.269081   | 0.24985  | 0.395366    | no  |
| Rhot1   | 13.7294 | 12.7917  | -0.102059   | 0.5024   | 0.656504    | no  |
| Rhot2   | 41.2266 | 40.0403  | -0.0421228  | 0.79055  | 0.877833    | no  |
| Ric8    | 51.699  | 56.3095  | 0.123243    | 0.40575  | 0.564776    | no  |
| Ric8b   | 7.4943  | 8.16526  | 0.123704    | 0.4272   | 0.585602    | no  |
| Rictor  | 16.9161 | 18.0819  | 0.0961425   | 0.4912   | 0.645994    | no  |
| Rif1    | 11.7938 | 12.8098  | 0.119218    | 0.40115  | 0.560185    | no  |
| Rilpl2  | 75.9753 | 88.7118  | 0.223597    | 0.1215   | 0.226433    | no  |
| Rin3    | 33.3431 | 36.8313  | 0.143545    | 0.3092   | 0.462568    | no  |
| Ring1   | 15.7666 | 16.8249  | 0.0937252   | 0.5574   | 0.704316    | no  |
| Rinl    | 225.528 | 218.714  | -0.0442615  | 0.7601   | 0.857308    | no  |
| Rint1   | 6.62294 | 6.84001  | 0.0465252   | 0.78655  | 0.875057    | no  |
| Riok1   | 23.7211 | 25.379   | 0.0974654   | 0.5062   | 0.660149    | no  |
| Riok2   | 9.53129 | 10.4896  | 0.138211    | 0.3912   | 0.550242    | no  |
| Riok3   | 44.5645 | 43.6892  | -0.028619   | 0.84445  | 0.911333    | no  |
| Ripk1   | 26.4182 | 25.6631  | -0.0418364  | 0.7729   | 0.865808    | no  |
| Ripk2   | 8.306   | 7.97004  | -0.0595682  | 0.7418   | 0.84512     | no  |

|          |          |          |             |          |             |     |
|----------|----------|----------|-------------|----------|-------------|-----|
| Ripk3    | 38.8288  | 36.2037  | -0.100989   | 0.4916   | 0.646364    | no  |
| Rit1     | 18.6454  | 15.7044  | -0.24765    | 0.10695  | 0.204241    | no  |
| Rita1    | 1.95393  | 1.94203  | -0.00881294 | 0.9758   | 0.986676    | no  |
| Rlf      | 13.5785  | 14.0499  | 0.049239    | 0.72835  | 0.835379    | no  |
| Rlim     | 6.40791  | 6.75233  | 0.0755324   | 0.6157   | 0.752547    | no  |
| Rln3     | 0.617176 | 1.03551  | 0.746595    | 0.38825  | 0.547434    | no  |
| Rltpr    | 37.4277  | 48.5988  | 0.376814    | 0.0273   | 0.0652033   | no  |
| Rmdn1    | 3.48576  | 4.14676  | 0.250513    | 0.271    | 0.418962    | no  |
| Rmdn2    | 2.19798  | 2.18065  | -0.0114183  | 0.96785  | 0.982494    | no  |
| Rmdn3    | 9.32848  | 10.8913  | 0.223462    | 0.1909   | 0.324068    | no  |
| Rmi1     | 15.6063  | 15.0058  | -0.0566026  | 0.91675  | 0.954324    | no  |
| Rmi2     | 1.19782  | 0.786511 | -0.606867   | 0.0304   | 0.0713542   | no  |
| Rmnd1    | 12.8761  | 13.3556  | 0.0527495   | 0.75615  | 0.854504    | no  |
| Rmnd5a   | 30.1402  | 28.4     | -0.0857997  | 0.54345  | 0.692504    | no  |
| Rmnd5b   | 52.9961  | 62.7367  | 0.243424    | 0.15825  | 0.279128    | no  |
| Rnaseh1  | 17.3878  | 19.2267  | 0.145036    | 0.378    | 0.536994    | no  |
| Rnaseh2a | 12.8894  | 13.4795  | 0.0645812   | 0.6952   | 0.812609    | no  |
| Rnaseh2b | 27.1929  | 19.7469  | -0.461605   | 0.005    | 0.0149735   | yes |
| Rnaseh2c | 61.8159  | 54.9065  | -0.171003   | 0.30085  | 0.453314    | no  |
| Rnasek   | 138.154  | 130.605  | -0.0810588  | 0.58995  | 0.731602    | no  |
| Rnasel   | 22.2517  | 27.3874  | 0.299595    | 0.03635  | 0.0829933   | no  |
| Rnaset2a | 11.2856  | 9.59937  | -0.233471   | 0.69215  | 0.810561    | no  |
| Rnaset2b | 18.3251  | 19.5479  | 0.0931942   | 0.6062   | 0.744662    | no  |
| Rnf10    | 69.6735  | 68.7314  | -0.019641   | 0.89105  | 0.938954    | no  |
| Rnf103   | 6.29355  | 6.76144  | 0.103456    | 0.54445  | 0.693265    | no  |
| Rnf11    | 10.9429  | 9.90551  | -0.143691   | 0.4009   | 0.559891    | no  |
| Rnf111   | 22.6301  | 23.2932  | 0.0416641   | 0.77245  | 0.865592    | no  |
| Rnf113a1 | 5.16004  | 4.64792  | -0.150796   | 0.54975  | 0.697811    | no  |
| Rnf113a2 | 28.261   | 28.3228  | 0.00315511  | 0.98535  | 0.991539    | no  |
| Rnf114   | 69.7634  | 63.9829  | -0.124785   | 0.42915  | 0.587442    | no  |
| Rnf115   | 56.4546  | 56.1683  | -0.00733491 | 0.9589   | 0.977909    | no  |
| Rnf121   | 18.2825  | 19.8457  | 0.118361    | 0.4816   | 0.637216    | no  |
| Rnf123   | 33.7807  | 38.1335  | 0.174859    | 0.25535  | 0.400167    | no  |
| Rnf125   | 44.5186  | 53.252   | 0.258429    | 0.0887   | 0.175127    | no  |
| Rnf126   | 30.9227  | 30.5143  | -0.0191763  | 0.90095  | 0.945139    | no  |
| Rnf13    | 39.0022  | 37.6313  | -0.0516235  | 0.7398   | 0.843563    | no  |
| Rnf130   | 6.17108  | 7.72484  | 0.323981    | 0.11315  | 0.213745    | no  |
| Rnf135   | 3.94973  | 4.52451  | 0.19601     | 0.3665   | 0.524914    | no  |
| Rnf138   | 43.1273  | 50.8308  | 0.237101    | 0.09215  | 0.180675    | no  |
| Rnf139   | 13.6576  | 13.5435  | -0.0121005  | 0.94065  | 0.967884    | no  |
| Rnf14    | 33.427   | 32.0031  | -0.0628008  | 0.66805  | 0.792889    | no  |
| Rnf141   | 4.88626  | 5.4005   | 0.144365    | 0.58615  | 0.728348    | no  |
| Rnf144a  | 11.6683  | 18.7382  | 0.683388    | 5.00E-05 | 0.000236281 | yes |
| Rnf145   | 45.9569  | 48.4617  | 0.0765623   | 0.58705  | 0.729184    | no  |
| Rnf146   | 18.9363  | 18.739   | -0.0151052  | 0.92245  | 0.957899    | no  |
| Rnf149   | 11.5232  | 11.8134  | 0.0358869   | 0.8287   | 0.9016      | no  |
| Rnf157   | 1.14472  | 0.837188 | -0.451371   | 0.0811   | 0.162453    | no  |
| Rnf166   | 156.499  | 135.218  | -0.210871   | 0.1382   | 0.250474    | no  |
| Rnf167   | 136.377  | 153.169  | 0.167526    | 0.23585  | 0.380271    | no  |
| Rnf168   | 5.33834  | 5.1703   | -0.0461448  | 0.778    | 0.869258    | no  |
| Rnf169   | 7.59042  | 7.42375  | -0.0320311  | 0.8349   | 0.905456    | no  |
| Rnf170   | 8.58596  | 8.21282  | -0.0641022  | 0.6862   | 0.806255    | no  |
| Rnf181   | 59.8739  | 61.3703  | 0.0356115   | 0.80655  | 0.887792    | no  |
| Rnf185   | 5.67994  | 5.2763   | -0.106349   | 0.55645  | 0.70338     | no  |
| Rnf187   | 96.362   | 93.4407  | -0.0444137  | 0.7518   | 0.85166     | no  |
| Rnf19a   | 15.8958  | 13.953   | -0.188066   | 0.20325  | 0.34023     | no  |
| Rnf19b   | 27.1556  | 29.8623  | 0.137076    | 0.35     | 0.507346    | no  |

|         |          |         |             |          |            |     |
|---------|----------|---------|-------------|----------|------------|-----|
| Rnf2    | 16.4306  | 19.7953 | 0.26877     | 0.07905  | 0.159006   | no  |
| Rnf20   | 37.2586  | 36.6794 | -0.0226011  | 0.87295  | 0.928629   | no  |
| Rnf214  | 8.53923  | 7.8156  | -0.127749   | 0.6683   | 0.793065   | no  |
| Rnf215  | 12.9621  | 14.129  | 0.124358    | 0.5055   | 0.659468   | no  |
| Rnf216  | 15.6747  | 15.7461 | 0.00655985  | 0.96255  | 0.979918   | no  |
| Rnf219  | 4.28985  | 4.5211  | 0.0757475   | 0.68365  | 0.804344   | no  |
| Rnf220  | 32.8674  | 31.1819 | -0.0759474  | 0.59635  | 0.736768   | no  |
| Rnf24   | 1.87341  | 1.5509  | -0.272557   | 0.5527   | 0.700283   | no  |
| Rnf25   | 16.9123  | 17.7016 | 0.0658077   | 0.6981   | 0.814744   | no  |
| Rnf26   | 13.4005  | 11.2423 | -0.253348   | 0.12445  | 0.230816   | no  |
| Rnf31   | 29.8914  | 29.7841 | -0.005189   | 0.9715   | 0.984288   | no  |
| Rnf34   | 17.5291  | 24.3846 | 0.476217    | 0.0023   | 0.0075545  | yes |
| Rnf38   | 28.8649  | 30.8251 | 0.0947875   | 0.5055   | 0.659468   | no  |
| Rnf4    | 47.4943  | 44.0322 | -0.109196   | 0.44245  | 0.600304   | no  |
| Rnf40   | 35.2854  | 35.3541 | 0.00280578  | 0.98465  | 0.991109   | no  |
| Rnf41   | 6.1714   | 6.73541 | 0.126169    | 0.4349   | 0.593047   | no  |
| Rnf43   | 1.99216  | 2.02078 | 0.0205733   | 0.9201   | 0.956443   | no  |
| Rnf44   | 57.6467  | 59.4152 | 0.0435955   | 0.75905  | 0.856601   | no  |
| Rnf5    | 24.5046  | 27.558  | 0.169419    | 0.3064   | 0.459441   | no  |
| Rnf6    | 26.9918  | 26.8769 | -0.00615811 | 0.96515  | 0.981023   | no  |
| Rnf7    | 51.6102  | 59.1736 | 0.197297    | 0.1954   | 0.330088   | no  |
| Rnf8    | 15.9722  | 15.906  | -0.00598582 | 0.97035  | 0.983894   | no  |
| Rnft1   | 6.88243  | 6.68992 | -0.0409311  | 0.80055  | 0.884028   | no  |
| Rngtt   | 11.1955  | 10.3047 | -0.119617   | 0.4327   | 0.590915   | no  |
| Rnh1    | 59.0235  | 61.5752 | 0.061059    | 0.67145  | 0.795399   | no  |
| Rnls    | 0.812692 | 1.09046 | 0.424154    | 0.298    | 0.449961   | no  |
| Rnmt    | 6.60903  | 6.35496 | -0.0565566  | 0.71705  | 0.827677   | no  |
| Rnmtl1  | 2.38865  | 2.78513 | 0.221545    | 0.43065  | 0.588935   | no  |
| Rnpc3   | 15.2563  | 13.4021 | -0.186945   | 0.24795  | 0.393232   | no  |
| Rnpep   | 38.763   | 40.5589 | 0.0653355   | 0.6551   | 0.783261   | no  |
| Rnpepl1 | 34.3271  | 34.856  | 0.0220579   | 0.87915  | 0.932366   | no  |
| Rnps1   | 89.3238  | 76.5083 | -0.223429   | 0.12115  | 0.225889   | no  |
| Rock1   | 30.3969  | 32.7712 | 0.108502    | 0.4466   | 0.604181   | no  |
| Rock2   | 9.02327  | 8.98692 | -0.00582336 | 0.9709   | 0.984084   | no  |
| Rogdi   | 2.72943  | 3.63782 | 0.414475    | 0.1266   | 0.234022   | no  |
| Rom1    | 31.983   | 35.9093 | 0.167056    | 0.2714   | 0.419434   | no  |
| Romo1   | 75.9832  | 80.5445 | 0.0841062   | 0.76995  | 0.863847   | no  |
| Ropn1l  | 1.29039  | 1.81217 | 0.489914    | 0.245    | 0.39007    | no  |
| Rora    | 20.5278  | 20.8923 | 0.0253935   | 0.8579   | 0.919703   | no  |
| Rp2h    | 8.25379  | 7.14404 | -0.208317   | 0.32295  | 0.477961   | no  |
| Rp9     | 60.1839  | 60.4196 | 0.00564036  | 0.9715   | 0.984288   | no  |
| Rpa1    | 91.9703  | 78.7982 | -0.223006   | 0.11425  | 0.215482   | no  |
| Rpa2    | 79.6991  | 56.2343 | -0.503113   | 5.00E-04 | 0.00193907 | yes |
| Rpa3    | 49.9008  | 39.0043 | -0.355433   | 0.041    | 0.0919182  | no  |
| Rpain   | 9.95541  | 9.3188  | -0.0953367  | 0.7984   | 0.882703   | no  |
| Rpap1   | 12.6375  | 12.8655 | 0.0257899   | 0.8626   | 0.922304   | no  |
| Rpap2   | 14.5089  | 13.6339 | -0.0897397  | 0.6321   | 0.76554    | no  |
| Rpap3   | 7.10904  | 7.43566 | 0.0648076   | 0.7239   | 0.832507   | no  |
| Rpe     | 19.6111  | 19.7218 | 0.00812611  | 0.957    | 0.976917   | no  |
| Rpf1    | 37.2442  | 38.1281 | 0.0338381   | 0.82715  | 0.900787   | no  |
| Rpf2    | 15.137   | 16.5804 | 0.131395    | 0.4414   | 0.599271   | no  |
| Rpgr    | 1.91336  | 1.84718 | -0.0507811  | 0.8365   | 0.906314   | no  |
| Rpgrip1 | 1.67146  | 2.33969 | 0.485208    | 0.3894   | 0.548541   | no  |
| Rph3al  | 2.29324  | 2.91119 | 0.344221    | 0.15715  | 0.2775     | no  |
| Rpia    | 32.3212  | 34.8461 | 0.108514    | 0.46325  | 0.620356   | no  |
| Rpl10   | 1857.26  | 1890.17 | 0.02534     | 0.863    | 0.92255    | no  |
| Rpl10a  | 1245.21  | 1248.65 | 0.00398635  | 0.97765  | 0.987556   | no  |

|           |          |         |              |         |           |     |
|-----------|----------|---------|--------------|---------|-----------|-----|
| Rpl11     | 2646.67  | 2679.57 | 0.0178259    | 0.90295 | 0.946337  | no  |
| Rpl12     | 2171.35  | 2332.29 | 0.103155     | 0.4804  | 0.636141  | no  |
| Rpl13     | 1979.69  | 1996    | 0.0118313    | 0.93895 | 0.966952  | no  |
| Rpl13a    | 3752.32  | 2679.99 | -0.485555    | 0.0058  | 0.017041  | yes |
| Rpl14     | 1049.79  | 1070.7  | 0.0284507    | 0.84445 | 0.911333  | no  |
| Rpl15     | 451.406  | 453.378 | 0.00628925   | 0.96685 | 0.981973  | no  |
| Rpl17     | 2863.6   | 2869.47 | 0.00295261   | 0.9854  | 0.991539  | no  |
| Rpl18     | 2373.21  | 2612.78 | 0.138744     | 0.36145 | 0.519611  | no  |
| Rpl18a    | 1328.33  | 1329.14 | 0.000883594  | 0.9956  | 0.997041  | no  |
| Rpl19     | 2597.16  | 2682.66 | 0.0467253    | 0.7573  | 0.855392  | no  |
| Rpl21     | 704.882  | 742.76  | 0.0755145    | 0.6218  | 0.757223  | no  |
| Rpl22     | 183.109  | 191.142 | 0.0619391    | 0.66305 | 0.78925   | no  |
| Rpl22l1   | 448.413  | 388.122 | -0.20832     | 0.1459  | 0.261249  | no  |
| Rpl23     | 1206.34  | 1259.9  | 0.0626783    | 0.67225 | 0.79596   | no  |
| Rpl23a    | 3573.63  | 3539.34 | -0.0139117   | 0.92615 | 0.95975   | no  |
| Rpl24     | 1628.83  | 1501.81 | -0.117132    | 0.41595 | 0.574656  | no  |
| Rpl26     | 31.479   | 12.0643 | -1.38365     | 0.48165 | 0.63727   | no  |
| Rpl27     | 1357.34  | 1344.54 | -0.013668    | 0.92655 | 0.959953  | no  |
| Rpl27a    | 1089.77  | 1074.06 | -0.0209513   | 0.8886  | 0.937548  | no  |
| Rpl28     | 2281     | 2242.48 | -0.0245681   | 0.86635 | 0.924646  | no  |
| Rpl29     | 1719.73  | 2033.38 | 0.241697     | 0.104   | 0.199606  | no  |
| Rpl3      | 1250.29  | 1257.64 | 0.00845908   | 0.9563  | 0.97657   | no  |
| Rpl30     | 56.7422  | 59.342  | 0.0646306    | 0.9567  | 0.976752  | no  |
| Rpl31     | 758.393  | 718.207 | -0.0785467   | 0.5862  | 0.728359  | no  |
| Rpl32     | 4263.11  | 4026.08 | -0.0825286   | 0.5891  | 0.730869  | no  |
| Rpl34     | 262.891  | 242.922 | -0.113968    | 0.8042  | 0.886533  | no  |
| Rpl34-ps1 | 3034.51  | 3027.29 | -0.00343954  | 0.98295 | 0.990175  | no  |
| Rpl35     | 2038.24  | 2071.73 | 0.0235124    | 0.87135 | 0.927752  | no  |
| Rpl35a    | 2117.3   | 2095.27 | -0.0150875   | 0.9177  | 0.954919  | no  |
| Rpl36     | 1981.48  | 2015.75 | 0.0247384    | 0.86155 | 0.921781  | no  |
| Rpl36a    | 901.359  | 995.47  | 0.143277     | 0.312   | 0.465661  | no  |
| Rpl36al   | 840.008  | 821.025 | -0.0329764   | 0.8131  | 0.891845  | no  |
| Rpl37     | 635.092  | 624.939 | -0.0232511   | 0.86925 | 0.926453  | no  |
| Rpl37a    | 1713.65  | 1740.07 | 0.0220694    | 0.8823  | 0.934191  | no  |
| Rpl38     | 4155.9   | 4095.24 | -0.0212132   | 0.8854  | 0.935946  | no  |
| Rpl39     | 4131.36  | 4129.93 | -0.000501517 | 0.99745 | 0.998044  | no  |
| Rpl39l    | 1.15105  | 1.17218 | 0.0262537    | 0.9514  | 0.974004  | no  |
| Rpl4      | 2176.16  | 2167.23 | -0.00593353  | 0.97545 | 0.986548  | no  |
| Rpl41     | 4242.07  | 4216.44 | -0.00874295  | 0.9525  | 0.974593  | no  |
| Rpl5      | 844.802  | 828.598 | -0.0279406   | 0.8603  | 0.920989  | no  |
| Rpl6      | 1254.25  | 1238.23 | -0.0185438   | 0.90255 | 0.946129  | no  |
| Rpl7      | 2118.9   | 2068.74 | -0.0345616   | 0.82675 | 0.900589  | no  |
| Rpl7a     | 1761.4   | 1680.7  | -0.0676638   | 0.65705 | 0.784623  | no  |
| Rpl7l1    | 27.1606  | 26.4799 | -0.0366171   | 0.8031  | 0.885749  | no  |
| Rpl8      | 1834.57  | 1830.08 | -0.00353296  | 0.98215 | 0.989722  | no  |
| Rpl9      | 2356.11  | 2400.16 | 0.0267207    | 0.8617  | 0.921858  | no  |
| Rplp0     | 2705.77  | 2777.67 | 0.0378328    | 0.83845 | 0.907423  | no  |
| Rplp1     | 4485.27  | 4865.78 | 0.117476     | 0.4454  | 0.603054  | no  |
| Rplp2     | 3509.43  | 3617.02 | 0.0435634    | 0.76375 | 0.859817  | no  |
| Rpn1      | 46.7651  | 45.4716 | -0.0404672   | 0.7764  | 0.868254  | no  |
| Rpn2      | 85.3328  | 85.5931 | 0.00439464   | 0.9734  | 0.985449  | no  |
| Rpp14     | 8.31404  | 8.70633 | 0.0665142    | 0.70345 | 0.818282  | no  |
| Rpp21     | 80.5523  | 74.6836 | -0.109135    | 0.5133  | 0.666343  | no  |
| Rpp25l    | 28.2399  | 26.8138 | -0.0747586   | 0.6706  | 0.794859  | no  |
| Rpp30     | 9.70397  | 9.67065 | -0.00496251  | 0.9749  | 0.986246  | no  |
| Rpp38     | 2.26335  | 2.2615  | -0.00118321  | 0.97295 | 0.985135  | no  |
| Rpp40     | 0.653123 | 1.06091 | 0.699873     | 0.038   | 0.0861807 | no  |

|          |          |         |             |          |            |     |
|----------|----------|---------|-------------|----------|------------|-----|
| Rprd1a   | 2.89999  | 3.017   | 0.0570688   | 0.7668   | 0.861724   | no  |
| Rprd1b   | 12.4776  | 11.019  | -0.179342   | 0.23245  | 0.37619    | no  |
| Rprd2    | 9.4381   | 10.5343 | 0.158523    | 0.2739   | 0.422428   | no  |
| Rps10    | 2894.98  | 2791.86 | -0.0523268  | 0.7273   | 0.834785   | no  |
| Rps11    | 3812.8   | 2667.56 | -0.515332   | 9.00E-04 | 0.00327966 | yes |
| Rps12    | 3107.79  | 3171.73 | 0.0293798   | 0.8406   | 0.908831   | no  |
| Rps13    | 2471.8   | 2456.56 | -0.00892256 | 0.95325  | 0.974964   | no  |
| Rps14    | 2799.17  | 2837.27 | 0.0195041   | 0.893    | 0.940125   | no  |
| Rps15    | 3217.91  | 3412.56 | 0.0847289   | 0.56245  | 0.708402   | no  |
| Rps15a   | 229.631  | 235.264 | 0.0349665   | 0.81885  | 0.895494   | no  |
| Rps16    | 2843.42  | 2967.68 | 0.0617123   | 0.67925  | 0.801237   | no  |
| Rps17    | 1742.54  | 1625.28 | -0.100501   | 0.47485  | 0.63122    | no  |
| Rps18    | 3264.93  | 3342.25 | 0.0337676   | 0.822    | 0.897451   | no  |
| Rps19    | 1571.51  | 1709.31 | 0.121258    | 0.4016   | 0.560602   | no  |
| Rps19bp1 | 17.8841  | 19.3071 | 0.11046     | 0.55865  | 0.705416   | no  |
| Rps2     | 1513.3   | 1497.02 | -0.015601   | 0.92085  | 0.956941   | no  |
| Rps20    | 2195.57  | 2328.48 | 0.0847899   | 0.5536   | 0.701084   | no  |
| Rps21    | 2645.96  | 2915    | 0.139701    | 0.32225  | 0.477176   | no  |
| Rps23    | 2532.91  | 2576.81 | 0.0247914   | 0.8694   | 0.926543   | no  |
| Rps24    | 2203.55  | 2183.61 | -0.0131196  | 0.93235  | 0.96305    | no  |
| Rps25    | 1271.42  | 1266.86 | -0.00518679 | 0.9727   | 0.984995   | no  |
| Rps26    | 2296.91  | 2203.18 | -0.0601086  | 0.6709   | 0.795108   | no  |
| Rps27    | 126.391  | 126.398 | 7.92E-05    | 0.9993   | 0.999343   | no  |
| Rps27a   | 1580.45  | 1678.6  | 0.0869218   | 0.55165  | 0.69948    | no  |
| Rps27l   | 160.512  | 155.835 | -0.0426632  | 0.7775   | 0.869002   | no  |
| Rps27rt  | 7692.66  | 7591.59 | -0.0190815  | 0.8978   | 0.943293   | no  |
| Rps28    | 3215.38  | 3656.98 | 0.185664    | 0.19265  | 0.326364   | no  |
| Rps29    | 2861.97  | 2872.63 | 0.00536368  | 0.9704   | 0.983894   | no  |
| Rps3     | 1016.81  | 990.586 | -0.0376958  | 0.8079   | 0.888752   | no  |
| Rps3a1   | 2430.84  | 2416.71 | -0.00841452 | 0.9599   | 0.978377   | no  |
| Rps4x    | 2559.7   | 2507.91 | -0.0294894  | 0.8517   | 0.915587   | no  |
| Rps5     | 1913.02  | 1909.1  | -0.00295546 | 0.98345  | 0.99041    | no  |
| Rps6     | 1651.88  | 1627.45 | -0.0214934  | 0.8926   | 0.939914   | no  |
| Rps6ka1  | 119.968  | 118.51  | -0.0176482  | 0.89965  | 0.944435   | no  |
| Rps6ka3  | 41.3759  | 40.4068 | -0.0341918  | 0.80815  | 0.888874   | no  |
| Rps6ka4  | 30.3183  | 29.8108 | -0.0243535  | 0.85865  | 0.920073   | no  |
| Rps6ka5  | 3.61065  | 4.53769 | 0.329698    | 0.061    | 0.128572   | no  |
| Rps6kb1  | 16.4586  | 16.5595 | 0.00882576  | 0.9516   | 0.97409    | no  |
| Rps6kb2  | 26.7502  | 25.5199 | -0.0679274  | 0.66645  | 0.791735   | no  |
| Rps6kc1  | 2.12804  | 2.21182 | 0.0557102   | 0.7883   | 0.876397   | no  |
| Rps7     | 1696.3   | 1725.66 | 0.024763    | 0.8691   | 0.926349   | no  |
| Rps8     | 2201.52  | 2231.06 | 0.0192274   | 0.8982   | 0.943615   | no  |
| Rps9     | 2302.64  | 2424.52 | 0.07441     | 0.6228   | 0.758009   | no  |
| Rpsa     | 1827.47  | 1727.31 | -0.0813228  | 0.6485   | 0.778165   | no  |
| Rptor    | 16.9241  | 19.3608 | 0.194059    | 0.16995  | 0.295395   | no  |
| Rpusd1   | 4.09029  | 3.3589  | -0.284215   | 0.2288   | 0.371955   | no  |
| Rpusd2   | 0.996517 | 1.41732 | 0.508195    | 0.0313   | 0.0731359  | no  |
| Rpusd3   | 6.26381  | 5.73068 | -0.128335   | 0.5731   | 0.717374   | no  |
| Rpusd4   | 25.5154  | 26.2814 | 0.0426723   | 0.78075  | 0.871049   | no  |
| Rqcd1    | 21.5386  | 19.4455 | -0.147488   | 0.5113   | 0.664492   | no  |
| Rrad     | 12.3634  | 13.3185 | 0.107357    | 0.5376   | 0.687582   | no  |
| Rraga    | 38.5102  | 35.4008 | -0.121456   | 0.4131   | 0.571882   | no  |
| Rragb    | 4.44857  | 6.35361 | 0.514236    | 0.00895  | 0.0248832  | yes |
| Rragc    | 37.6721  | 36.466  | -0.046947   | 0.74715  | 0.848667   | no  |
| Rras     | 23.3444  | 18.863  | -0.307515   | 0.09255  | 0.181324   | no  |
| Rras2    | 28.3146  | 23.034  | -0.29778    | 0.0485   | 0.105972   | no  |
| Rrbp1    | 27.5028  | 27.8118 | 0.0161187   | 0.91205  | 0.951748   | no  |

|         |          |          |             |          |             |     |
|---------|----------|----------|-------------|----------|-------------|-----|
| Rreb1   | 4.3847   | 5.49928  | 0.326765    | 0.03285  | 0.0761651   | no  |
| Rrm1    | 33.0674  | 21.9155  | -0.593457   | 1.00E-04 | 0.000450026 | yes |
| Rrm2    | 79.5377  | 46.0088  | -0.78973    | 5.00E-05 | 0.000236281 | yes |
| Rrm2b   | 10.4894  | 9.87027  | -0.0877768  | 0.56385  | 0.709646    | no  |
| Rrn3    | 16.1174  | 16.232   | 0.0102265   | 0.94645  | 0.971035    | no  |
| Rrnad1  | 15.0187  | 15.7312  | 0.0668697   | 0.777    | 0.868719    | no  |
| Rrp1    | 89.5199  | 93.0462  | 0.055739    | 0.69295  | 0.811108    | no  |
| Rrp12   | 6.38795  | 8.98702  | 0.492489    | 0.0025   | 0.00813232  | yes |
| Rrp15   | 11.97    | 14.5272  | 0.27933     | 0.13275  | 0.243118    | no  |
| Rrp1b   | 10.6937  | 10.6374  | -0.00761033 | 0.9621   | 0.979771    | no  |
| Rrp36   | 35.2759  | 34.7752  | -0.0206261  | 0.89135  | 0.9392      | no  |
| Rrp7a   | 44.211   | 46.396   | 0.0695941   | 0.66205  | 0.788579    | no  |
| Rrp8    | 14.8948  | 15.3724  | 0.0455314   | 0.9128   | 0.952249    | no  |
| Rrp9    | 18.3522  | 21.2956  | 0.214604    | 0.18905  | 0.321732    | no  |
| Rrs1    | 19.9978  | 21.1996  | 0.0841921   | 0.58345  | 0.726195    | no  |
| Rsad1   | 0.931092 | 1.14048  | 0.292646    | 0.2557   | 0.4006      | no  |
| Rsad2   | 0.86193  | 1.17754  | 0.45014     | 0.09685  | 0.188331    | no  |
| Rsbn1   | 5.97809  | 6.15475  | 0.042016    | 0.88075  | 0.933144    | no  |
| Rsbn1l  | 24.8325  | 23.3285  | -0.0901344  | 0.54305  | 0.692219    | no  |
| Rsc1a1  | 3.87322  | 5.13789  | 0.40764     | 0.44275  | 0.600595    | no  |
| Rsf1    | 8.16528  | 7.9251   | -0.043073   | 0.76645  | 0.861509    | no  |
| Rsl1    | 4.60366  | 4.7086   | 0.0325163   | 0.87525  | 0.929983    | no  |
| Rsl1d1  | 65.6908  | 65.7795  | 0.00194668  | 0.99125  | 0.99466     | no  |
| Rsl24d1 | 38.5663  | 37.9457  | -0.0234046  | 0.876    | 0.930458    | no  |
| Rsph1   | 1.07512  | 0.816435 | -0.397085   | 0.3858   | 0.544829    | no  |
| Rsph3a  | 3.66996  | 3.35947  | -0.127533   | 0.5843   | 0.726907    | no  |
| Rsph3b  | 1.72758  | 1.39017  | -0.313494   | 0.3312   | 0.486884    | no  |
| Rspry1  | 14.1321  | 14.7358  | 0.0603498   | 0.6875   | 0.807192    | no  |
| Rsrc1   | 5.28443  | 5.81937  | 0.139115    | 0.43045  | 0.588765    | no  |
| Rsrc2   | 74.4421  | 75.5324  | 0.0209769   | 0.88095  | 0.933257    | no  |
| Rsrp1   | 226.813  | 210.943  | -0.104648   | 0.46545  | 0.622405    | no  |
| Rsu1    | 45.0966  | 45.5629  | 0.0148405   | 0.92275  | 0.957971    | no  |
| Rtca    | 27.1661  | 26.6543  | -0.027439   | 0.86045  | 0.921093    | no  |
| Rtcb    | 82.0332  | 81.2462  | -0.0139082  | 0.9227   | 0.95797     | no  |
| Rtel1   | 15.9276  | 15.2729  | -0.0605508  | 0.6891   | 0.808357    | no  |
| Rtf1    | 27.5707  | 25.9978  | -0.084743   | 0.55855  | 0.70534     | no  |
| Rtfdc1  | 64.6888  | 64.9145  | 0.00502477  | 0.9713   | 0.984255    | no  |
| Rtn3    | 79.1036  | 68.3205  | -0.211425   | 0.1532   | 0.271845    | no  |
| Rtn4    | 28.6969  | 27.5732  | -0.0576315  | 0.69415  | 0.811933    | no  |
| Rtn4ip1 | 4.59009  | 4.6382   | 0.0150405   | 0.9372   | 0.965939    | no  |
| Rtn4rl1 | 13.2461  | 16.0472  | 0.276752    | 0.06955  | 0.143052    | no  |
| Rtp4    | 3.28787  | 3.22218  | -0.0291161  | 0.904    | 0.947072    | no  |
| Rttn    | 2.86469  | 2.76878  | -0.0491322  | 0.7739   | 0.866598    | no  |
| Rufy1   | 12.2636  | 13.2827  | 0.115167    | 0.47055  | 0.627074    | no  |
| Rufy2   | 5.68538  | 5.66816  | -0.00437689 | 0.9812   | 0.989259    | no  |
| Rufy3   | 3.11007  | 2.20694  | -0.494896   | 0.01615  | 0.0413937   | yes |
| Rundc1  | 13.6987  | 14.9427  | 0.125411    | 0.42675  | 0.585167    | no  |
| Rundc3a | 5.2788   | 6.45931  | 0.291168    | 0.11775  | 0.220868    | no  |
| Rundc3b | 4.44957  | 3.16535  | -0.491302   | 0.008    | 0.0225529   | yes |
| Runx1   | 16.8739  | 13.2582  | -0.347908   | 0.01705  | 0.0433541   | yes |
| Runx2   | 27.642   | 34.519   | 0.320529    | 0.03135  | 0.0732382   | no  |
| Runx3   | 66.7992  | 64.1529  | -0.0583167  | 0.6784   | 0.800569    | no  |
| Rusc1   | 35.5416  | 37.2228  | 0.0666767   | 0.65015  | 0.779442    | no  |
| Ruvbl1  | 19.7449  | 21.6981  | 0.136085    | 0.3938   | 0.552929    | no  |
| Ruvbl2  | 24.7779  | 26.6458  | 0.104855    | 0.49465  | 0.649346    | no  |
| Rwdd1   | 78.4739  | 75.5891  | -0.0540355  | 0.71025  | 0.823207    | no  |
| Rwdd2a  | 1.56836  | 1.12327  | -0.481544   | 0.20745  | 0.345686    | no  |

|         |         |         |             |          |             |     |
|---------|---------|---------|-------------|----------|-------------|-----|
| Rwdd2b  | 8.74741 | 7.21268 | -0.278321   | 0.12555  | 0.232569    | no  |
| Rwdd4a  | 13.4971 | 13.5968 | 0.010624    | 0.9455   | 0.970455    | no  |
| Rxra    | 11.4275 | 11.6867 | 0.0323598   | 0.8261   | 0.900187    | no  |
| Rxrb    | 38.9276 | 38.7125 | -0.00799349 | 0.95725  | 0.977087    | no  |
| Rybp    | 10.2878 | 10.2241 | -0.00894978 | 0.95395  | 0.975285    | no  |
| Ryk     | 4.37411 | 3.68207 | -0.248474   | 0.18525  | 0.316494    | no  |
| S100a1  | 6.37429 | 6.29393 | -0.0183053  | 0.93775  | 0.966332    | no  |
| S100a10 | 2341.24 | 2287.03 | -0.0337974  | 0.82115  | 0.896953    | no  |
| S100a11 | 1185.56 | 1153.66 | -0.0393573  | 0.78175  | 0.87182     | no  |
| S100a13 | 221.797 | 182.721 | -0.279599   | 0.05155  | 0.111566    | no  |
| S100a2  | 0.73012 | 1.27402 | 0.80318     | 0.53595  | 0.68623     | no  |
| S100a3  | 1.47317 | 1.32305 | -0.155058   | 0.76515  | 0.860664    | no  |
| S100a4  | 2998.03 | 3396.01 | 0.179827    | 0.22205  | 0.363763    | no  |
| S100a6  | 1864.69 | 2089.47 | 0.1642      | 0.27355  | 0.422045    | no  |
| S100pbp | 15.7136 | 13.7103 | -0.196754   | 0.25325  | 0.397617    | no  |
| S1pr1   | 156.545 | 177.033 | 0.177435    | 0.21945  | 0.360558    | no  |
| S1pr2   | 5.57139 | 4.76031 | -0.226982   | 0.22555  | 0.368181    | no  |
| S1pr4   | 157.844 | 150.96  | -0.0643343  | 0.657    | 0.784616    | no  |
| S1pr5   | 110.575 | 21.4333 | -2.3671     | 5.00E-05 | 0.000236281 | yes |
| Saal1   | 4.58307 | 4.12664 | -0.151349   | 0.37955  | 0.538545    | no  |
| Sac3d1  | 7.31948 | 6.78172 | -0.110089   | 0.5995   | 0.739405    | no  |
| Sacm1l  | 31.1238 | 30.1189 | -0.0473466  | 0.74035  | 0.843959    | no  |
| Sacs    | 3.27776 | 3.36443 | 0.0376523   | 0.8498   | 0.914255    | no  |
| Sae1    | 70.5891 | 64.2806 | -0.135061   | 0.34645  | 0.503524    | no  |
| Safb    | 46.9154 | 47.9264 | 0.0307587   | 0.82875  | 0.901627    | no  |
| Safb2   | 43.1908 | 44.7183 | 0.0501421   | 0.72095  | 0.830536    | no  |
| Samd1   | 17.3425 | 14.1483 | -0.293681   | 0.0654   | 0.135991    | no  |
| Samd10  | 5.81723 | 6.20438 | 0.0929547   | 0.61945  | 0.755482    | no  |
| Samd3   | 22.6612 | 12.1762 | -0.896161   | 5.00E-05 | 0.000236281 | yes |
| Samd4b  | 13.6552 | 14.0827 | 0.0444768   | 0.7658   | 0.861107    | no  |
| Samd8   | 3.3658  | 3.42342 | 0.0244882   | 0.88495  | 0.935641    | no  |
| Samd9l  | 51.9022 | 50.0122 | -0.0535162  | 0.70395  | 0.818702    | no  |
| Samhd1  | 227.18  | 270.385 | 0.25118     | 0.0869   | 0.172142    | no  |
| Samm50  | 66.408  | 64.6884 | -0.0378495  | 0.7919   | 0.878683    | no  |
| Samsn1  | 27.2769 | 24.0607 | -0.181002   | 0.23335  | 0.377353    | no  |
| Sap130  | 23.1864 | 20.8043 | -0.156401   | 0.27155  | 0.419592    | no  |
| Sap18   | 9.08099 | 8.24547 | -0.139247   | 0.6394   | 0.77106     | no  |
| Sap25   | 40.0887 | 35.3827 | -0.180154   | 0.67685  | 0.799435    | no  |
| Sap30   | 9.9518  | 8.00587 | -0.313899   | 0.1324   | 0.242603    | no  |
| Sap30bp | 20.1429 | 20.5973 | 0.0321839   | 0.83295  | 0.904133    | no  |
| Sap30l  | 25.9138 | 23.299  | -0.15345    | 0.32555  | 0.480811    | no  |
| Sapcd2  | 2.92898 | 1.96412 | -0.576513   | 0.0094   | 0.0259848   | yes |
| Sar1a   | 54.1019 | 51.7058 | -0.0653512  | 0.64435  | 0.774937    | no  |
| Sar1b   | 47.6021 | 41.2953 | -0.205048   | 0.17465  | 0.301855    | no  |
| Sarnp   | 102.754 | 94.6756 | -0.118125   | 0.40935  | 0.568374    | no  |
| Sars    | 59.3654 | 52.2167 | -0.185111   | 0.19255  | 0.326273    | no  |
| Sars2   | 14.3082 | 14.4593 | 0.0151576   | 0.9303   | 0.961904    | no  |
| Sart1   | 32.9507 | 32.7462 | -0.00898269 | 0.94965  | 0.972875    | no  |
| Sart3   | 21.4812 | 21.3947 | -0.00581982 | 0.96985  | 0.983661    | no  |
| Sash3   | 222.062 | 219.163 | -0.0189609  | 0.89565  | 0.941903    | no  |
| Sass6   | 4.0149  | 3.27984 | -0.291741   | 0.24375  | 0.388659    | no  |
| Sat1    | 74.6395 | 72.0528 | -0.0508857  | 0.7273   | 0.834785    | no  |
| Satb1   | 47.1061 | 47.2701 | 0.00501172  | 0.97305  | 0.985165    | no  |
| Sav1    | 15.3218 | 15.2398 | -0.00774561 | 0.9624   | 0.979878    | no  |
| Saysd1  | 5.50001 | 5.06807 | -0.117997   | 0.53915  | 0.688778    | no  |
| Sbds    | 34.2665 | 39.7592 | 0.21449     | 0.15995  | 0.281543    | no  |
| Sbf1    | 67.3391 | 67.1446 | -0.00417341 | 0.9766   | 0.987018    | no  |

|         |         |          |             |         |            |     |
|---------|---------|----------|-------------|---------|------------|-----|
| Sbk1    | 33.8506 | 32.5613  | -0.0560245  | 0.69635 | 0.813563   | no  |
| Sbno1   | 19.6415 | 18.415   | -0.0930179  | 0.50945 | 0.662906   | no  |
| Sbno2   | 22.506  | 22.4773  | -0.00183712 | 0.9905  | 0.994205   | no  |
| Sc5d    | 9.08037 | 10.4991  | 0.209446    | 0.2255  | 0.368133   | no  |
| Scaf1   | 30.0584 | 29.2674  | -0.0384731  | 0.78575 | 0.874526   | no  |
| Scaf11  | 23.1895 | 23.2205  | 0.00192518  | 0.98975 | 0.993841   | no  |
| Scaf4   | 17.9556 | 18.8645  | 0.0712393   | 0.6208  | 0.756488   | no  |
| Scaf8   | 27.7004 | 28.9119  | 0.0617592   | 0.66375 | 0.789644   | no  |
| Scai    | 4.1364  | 5.66118  | 0.452725    | 0.00305 | 0.00969839 | yes |
| Scamp2  | 38.0242 | 34.6793  | -0.132843   | 0.35765 | 0.515534   | no  |
| Scamp3  | 103.787 | 105.262  | 0.0203602   | 0.88785 | 0.937107   | no  |
| Scamp4  | 41.3109 | 43.1254  | 0.0620149   | 0.6822  | 0.803321   | no  |
| Scand1  | 114.764 | 113.392  | -0.0173523  | 0.9108  | 0.951016   | no  |
| Scap    | 22.1306 | 26.3782  | 0.253307    | 0.0784  | 0.157901   | no  |
| Scaper  | 4.72484 | 5.59709  | 0.244411    | 0.13395 | 0.244864   | no  |
| Scarb1  | 5.64238 | 5.32394  | -0.0838088  | 0.6597  | 0.786802   | no  |
| Scarb2  | 29.6081 | 36.5032  | 0.302034    | 0.0405  | 0.0910054  | no  |
| Scd2    | 26.8312 | 26.3051  | -0.0285719  | 0.84175 | 0.909559   | no  |
| Scfd1   | 29.8693 | 28.0708  | -0.0895919  | 0.54985 | 0.697887   | no  |
| Scfd2   | 9.46547 | 9.2146   | -0.0387529  | 0.8098  | 0.89001    | no  |
| Scimp   | 1.42078 | 0.819831 | -0.793288   | 0.0861  | 0.170801   | no  |
| Sclt1   | 3.20957 | 3.40214  | 0.0840643   | 0.6815  | 0.802831   | no  |
| Scly    | 25.0904 | 25.7596  | 0.0379738   | 0.8044  | 0.886642   | no  |
| Scmh1   | 1.10669 | 1.43789  | 0.377691    | 0.14635 | 0.261929   | no  |
| Scml4   | 18.5344 | 18.2013  | -0.0261614  | 0.85375 | 0.917009   | no  |
| Scnm1   | 44.4163 | 41.146   | -0.11034    | 0.4978  | 0.652171   | no  |
| Sco1    | 3.13251 | 3.31503  | 0.0817024   | 0.65575 | 0.783786   | no  |
| Sco2    | 24.6079 | 25.9191  | 0.0748929   | 0.84415 | 0.911134   | no  |
| Scoc    | 8.9981  | 7.6044   | -0.242786   | 0.18845 | 0.32092    | no  |
| Scp2    | 83.5108 | 85.1514  | 0.0280689   | 0.8375  | 0.906924   | no  |
| Scpep1  | 17.318  | 23.2229  | 0.423278    | 0.0058  | 0.017041   | yes |
| Scrib   | 18.0074 | 19.0035  | 0.0776721   | 0.58785 | 0.729857   | no  |
| Scrn2   | 5.00209 | 5.06097  | 0.016881    | 0.94225 | 0.968641   | no  |
| Scrn3   | 4.17184 | 3.5275   | -0.242038   | 0.20555 | 0.343233   | no  |
| Scyl1   | 26.661  | 27.0289  | 0.0197759   | 0.89    | 0.93838    | no  |
| Scyl2   | 22.7543 | 19.9875  | -0.187041   | 0.19925 | 0.335172   | no  |
| Scyl3   | 16.3668 | 15.6566  | -0.0640013  | 0.67375 | 0.797067   | no  |
| Sdad1   | 11.311  | 13.8496  | 0.292122    | 0.0502  | 0.109143   | no  |
| Sdcbp   | 99.9024 | 86.9502  | -0.20033    | 0.15215 | 0.270348   | no  |
| Sdcbp2  | 27.1551 | 25.6562  | -0.0819176  | 0.6036  | 0.742593   | no  |
| Sdccag3 | 75.499  | 66.8902  | -0.174663   | 0.2241  | 0.366399   | no  |
| Sdccag8 | 13.4751 | 12.1426  | -0.150212   | 0.33955 | 0.495967   | no  |
| Sde2    | 14.194  | 14.945   | 0.0743804   | 0.6351  | 0.767829   | no  |
| Sdf2    | 65.7218 | 60.9383  | -0.109022   | 0.45565 | 0.613239   | no  |
| Sdf2l1  | 43.7581 | 39.0123  | -0.165619   | 0.2847  | 0.435007   | no  |
| Sdf4    | 53.2265 | 55.9532  | 0.072077    | 0.60515 | 0.743864   | no  |
| Sdha    | 85.4205 | 87.2136  | 0.0299708   | 0.83085 | 0.902951   | no  |
| Sdhaf1  | 14.4802 | 15.2448  | 0.0742305   | 0.70355 | 0.818358   | no  |
| Sdhaf2  | 27.014  | 23.9957  | -0.170934   | 0.2433  | 0.388152   | no  |
| Sdhb    | 152.222 | 128.158  | -0.24825    | 0.08475 | 0.168602   | no  |
| Sdhc    | 70.0201 | 64.5492  | -0.11737    | 0.4217  | 0.580102   | no  |
| Sdhd    | 80.9657 | 82.6887  | 0.0303793   | 0.8324  | 0.903856   | no  |
| Sdr39u1 | 43.7447 | 44.1868  | 0.0145075   | 0.92235 | 0.957865   | no  |
| Sdr42e1 | 1.18989 | 1.28175  | 0.107284    | 0.6984  | 0.81496    | no  |
| Sec11a  | 144.446 | 150.915  | 0.0632073   | 0.65825 | 0.78567    | no  |
| Sec11c  | 171.799 | 164.405  | -0.0634692  | 0.65695 | 0.784596   | no  |
| Sec13   | 73.4864 | 71.4737  | -0.0400647  | 0.7845  | 0.873796   | no  |



|           |          |          |             |         |            |     |
|-----------|----------|----------|-------------|---------|------------|-----|
| Sec141l   | 15.6156  | 14.7443  | -0.082829   | 0.5976  | 0.737871   | no  |
| Sec16a    | 18.6579  | 20.687   | 0.14894     | 0.29205 | 0.443177   | no  |
| Sec22a    | 1.49134  | 1.49646  | 0.00494367  | 0.9862  | 0.99192    | no  |
| Sec22b    | 38.8038  | 36.2776  | -0.0971188  | 0.51695 | 0.669604   | no  |
| Sec22c    | 5.2973   | 5.14935  | -0.0408685  | 0.79645 | 0.881486   | no  |
| Sec23a    | 8.30914  | 6.67903  | -0.315061   | 0.05065 | 0.109962   | no  |
| Sec23b    | 31.446   | 29.9962  | -0.0680954  | 0.6401  | 0.771535   | no  |
| Sec23ip   | 21.5143  | 22.7294  | 0.079266    | 0.5876  | 0.729649   | no  |
| Sec24a    | 8.92875  | 9.35807  | 0.067753    | 0.6442  | 0.774849   | no  |
| Sec24b    | 29.4755  | 29.9359  | 0.0223606   | 0.87445 | 0.929494   | no  |
| Sec24c    | 58.7317  | 55.3095  | -0.0866127  | 0.54265 | 0.691797   | no  |
| Sec24d    | 10.0678  | 10.4763  | 0.0573802   | 0.7092  | 0.822477   | no  |
| Sec31a    | 37.6321  | 39.0274  | 0.052522    | 0.70805 | 0.821714   | no  |
| Sec31b    | 0.998046 | 1.10092  | 0.141537    | 0.59735 | 0.737655   | no  |
| Sec61a1   | 86.0412  | 83.7098  | -0.039632   | 0.78305 | 0.872787   | no  |
| Sec61a2   | 3.14901  | 2.95158  | -0.0934097  | 0.6787  | 0.800728   | no  |
| Sec61b    | 343.181  | 323.177  | -0.0866444  | 0.54215 | 0.691334   | no  |
| Sec61g    | 152.102  | 143.879  | -0.0801798  | 0.5759  | 0.719781   | no  |
| Sec62     | 31.8444  | 31.2137  | -0.0288583  | 0.84075 | 0.908896   | no  |
| Sec63     | 16.9428  | 17.0224  | 0.00676085  | 0.9644  | 0.980642   | no  |
| Secisbp2  | 26.2278  | 25.9977  | -0.0127137  | 0.93015 | 0.961819   | no  |
| Secisbp2l | 15.1967  | 14.8051  | -0.0376625  | 0.79555 | 0.880905   | no  |
| Seh1l     | 21.4106  | 21.1443  | -0.0180536  | 0.90695 | 0.948796   | no  |
| Sel1l     | 17.5474  | 17.3498  | -0.0163404  | 0.90755 | 0.949115   | no  |
| Selk      | 112.077  | 105.444  | -0.0880186  | 0.53935 | 0.688996   | no  |
| Sell      | 19.2039  | 26.6628  | 0.473428    | 0.00185 | 0.00622713 | yes |
| Selm      | 7.51807  | 8.77573  | 0.223157    | 0.35685 | 0.514644   | no  |
| Selo      | 20.081   | 18.2102  | -0.141084   | 0.56645 | 0.711713   | no  |
| Selplg    | 710.147  | 701.754  | -0.0171534  | 0.91655 | 0.954243   | no  |
| Selt      | 74.2957  | 78.2406  | 0.0746396   | 0.59535 | 0.735997   | no  |
| Sema4a    | 178.658  | 172.023  | -0.0545985  | 0.7101  | 0.823088   | no  |
| Sema4b    | 6.55212  | 7.439    | 0.183147    | 0.26385 | 0.410453   | no  |
| Sema4d    | 100.098  | 112.678  | 0.170789    | 0.2258  | 0.36847    | no  |
| Sema4f    | 14.3357  | 12.3024  | -0.220674   | 0.14055 | 0.253839   | no  |
| Sema7a    | 2.96993  | 3.11589  | 0.0692163   | 0.7397  | 0.843531   | no  |
| Senp1     | 12.7964  | 12.0521  | -0.0864548  | 0.5715  | 0.715955   | no  |
| Senp2     | 23.7228  | 23.6233  | -0.00606307 | 0.9669  | 0.98201    | no  |
| Senp3     | 43.6305  | 42.9509  | -0.0226479  | 0.87275 | 0.928543   | no  |
| Senp5     | 11.5703  | 11.734   | 0.020269    | 0.8891  | 0.93788    | no  |
| Senp6     | 34.8033  | 38.3868  | 0.141387    | 0.3181  | 0.472438   | no  |
| Senp7     | 24.2088  | 21.9629  | -0.140463   | 0.4372  | 0.595171   | no  |
| 15-Sep    | 125.225  | 122.675  | -0.0296817  | 0.83295 | 0.904133   | no  |
| Sephs1    | 9.78453  | 9.57974  | -0.0305146  | 0.8404  | 0.908712   | no  |
| Sephs2    | 33.0089  | 28.3301  | -0.220519   | 0.1396  | 0.25244    | no  |
| Sepn1     | 4.72826  | 4.59162  | -0.0423059  | 0.81515 | 0.893039   | no  |
| Seppp1    | 36.1043  | 50.1923  | 0.475294    | 0.00115 | 0.00407292 | yes |
| Sepsecs   | 5.64756  | 6.07151  | 0.104426    | 0.59685 | 0.737231   | no  |
| 1-Sep     | 592.952  | 541.098  | -0.132025   | 0.36045 | 0.518522   | no  |
| 10-Sep    | 1.04286  | 0.869289 | -0.26264    | 0.43695 | 0.594946   | no  |
| 11-Sep    | 58.0346  | 49.7294  | -0.222814   | 0.1161  | 0.21833    | no  |
| 2-Sep     | 45.128   | 39.1905  | -0.203517   | 0.15565 | 0.275354   | no  |
| 4-Sep     | 1.36348  | 1.30394  | -0.0644098  | 0.8523  | 0.916023   | no  |
| 6-Sep     | 95.4275  | 87.4865  | -0.125346   | 0.3831  | 0.542187   | no  |
| 7-Sep     | 115.701  | 102.471  | -0.175187   | 0.2146  | 0.354828   | no  |
| 8-Sep     | 1.29411  | 1.29878  | 0.00519669  | 0.98165 | 0.989458   | no  |
| 9-Sep     | 231.605  | 236.681  | 0.0312754   | 0.82745 | 0.900921   | no  |
| Sepw1     | 254.152  | 252.708  | -0.00822203 | 0.9536  | 0.975139   | no  |

|           |          |          |             |          |             |     |
|-----------|----------|----------|-------------|----------|-------------|-----|
| Serac1    | 1.54419  | 1.5707   | 0.024559    | 0.93215  | 0.962914    | no  |
| Serbp1    | 79.4221  | 76.401   | -0.0559503  | 0.6959   | 0.813212    | no  |
| Serf1     | 1.63103  | 1.74379  | 0.0964398   | 0.84625  | 0.912062    | no  |
| Serf2     | 118.604  | 114.597  | -0.049582   | 0.73915  | 0.843258    | no  |
| Sergef    | 7.76687  | 8.33485  | 0.101822    | 0.60615  | 0.74464     | no  |
| Serhl     | 15.2824  | 14.5216  | -0.0736721  | 0.83355  | 0.90452     | no  |
| Serinc1   | 43.645   | 40.381   | -0.112139   | 0.42765  | 0.586014    | no  |
| Serinc3   | 127.599  | 133.841  | 0.0689019   | 0.634    | 0.76692     | no  |
| Serinc4   | 17.8501  | 19.5845  | 0.133779    | 0.75235  | 0.851996    | no  |
| Serinc5   | 4.02304  | 4.38037  | 0.122767    | 0.4679   | 0.624592    | no  |
| Serp1     | 69.2364  | 67.0754  | -0.0457478  | 0.78825  | 0.876355    | no  |
| Serp2     | 14.0954  | 12.6822  | -0.152421   | 0.46125  | 0.618358    | no  |
| Serpina3g | 11.4657  | 9.63389  | -0.251134   | 0.1605   | 0.282286    | no  |
| Serpib1a  | 13.7377  | 14.8738  | 0.11463     | 0.4939   | 0.648627    | no  |
| Serpib1b  | 1.13389  | 0.710439 | -0.674503   | 0.09085  | 0.178643    | no  |
| Serpib6a  | 29.422   | 29.3776  | -0.00218052 | 0.99205  | 0.995095    | no  |
| Serpib6b  | 106.393  | 88.2416  | -0.26987    | 0.0572   | 0.121917    | no  |
| Serpib9   | 32.327   | 20.8208  | -0.634713   | 5.00E-05 | 0.000236281 | yes |
| Serpini1  | 6.418    | 11.8315  | 0.882443    | 5.00E-05 | 0.000236281 | yes |
| Sertad1   | 40.044   | 38.3946  | -0.060679   | 0.69935  | 0.815556    | no  |
| Sertad2   | 8.85678  | 8.04555  | -0.138592   | 0.3644   | 0.522649    | no  |
| Sertad3   | 10.407   | 9.15764  | -0.184501   | 0.35345  | 0.511056    | no  |
| Sesn1     | 15.8363  | 16.9994  | 0.102247    | 0.50675  | 0.660574    | no  |
| Sesn2     | 3.2421   | 4.30412  | 0.408789    | 0.0451   | 0.0997164   | no  |
| Sesn3     | 18.8765  | 20.5039  | 0.119312    | 0.43625  | 0.594291    | no  |
| Sestd1    | 0.232211 | 1.15794  | 2.31805     | 5.00E-05 | 0.000236281 | yes |
| Set       | 116.81   | 117.419  | 0.0075084   | 0.95805  | 0.977423    | no  |
| Setd1a    | 15.9621  | 15.813   | -0.0135435  | 0.9298   | 0.961598    | no  |
| Setd1b    | 11.6413  | 11.8899  | 0.0304848   | 0.8329   | 0.904133    | no  |
| Setd2     | 24.5666  | 23.9792  | -0.034913   | 0.8063   | 0.887697    | no  |
| Setd3     | 44.1595  | 44.8036  | 0.0208904   | 0.8806   | 0.933083    | no  |
| Setd4     | 4.79153  | 5.87081  | 0.293072    | 0.1607   | 0.282595    | no  |
| Setd5     | 31.1199  | 32.3071  | 0.0540127   | 0.7025   | 0.817554    | no  |
| Setd6     | 15.9603  | 15.4245  | -0.0492727  | 0.76445  | 0.860206    | no  |
| Setd7     | 17.5137  | 17.954   | 0.0358239   | 0.8043   | 0.886588    | no  |
| Setd8     | 39.7286  | 38.1211  | -0.0595892  | 0.67535  | 0.798238    | no  |
| Setdb1    | 15.3034  | 15.7602  | 0.042431    | 0.873    | 0.928655    | no  |
| Setdb2    | 14.2977  | 14.5341  | 0.0236555   | 0.8782   | 0.931855    | no  |
| Setmar    | 1.3095   | 1.33934  | 0.0325137   | 0.92355  | 0.958322    | no  |
| Setx      | 33.7791  | 37.2327  | 0.14044     | 0.3248   | 0.480005    | no  |
| Sf1       | 86.6499  | 84.2408  | -0.040679   | 0.7784   | 0.869554    | no  |
| Sf3a1     | 25.1053  | 26.9223  | 0.100809    | 0.4848   | 0.640142    | no  |
| Sf3a2     | 53.8768  | 56.7959  | 0.0761229   | 0.59515  | 0.735853    | no  |
| Sf3a3     | 46.935   | 44.5173  | -0.0762967  | 0.59705  | 0.737362    | no  |
| Sf3b1     | 165.347  | 169.369  | 0.0346726   | 0.8183   | 0.895142    | no  |
| Sf3b2     | 133.126  | 125.616  | -0.0837746  | 0.55075  | 0.698678    | no  |
| Sf3b3     | 52.9517  | 55.0628  | 0.0564016   | 0.6864   | 0.806383    | no  |
| Sf3b4     | 53.2727  | 50.3532  | -0.0813147  | 0.57285  | 0.717099    | no  |
| Sf3b5     | 117.829  | 107.764  | -0.128815   | 0.3904   | 0.549467    | no  |
| Sfi1      | 10.1511  | 8.98579  | -0.175922   | 0.5409   | 0.690239    | no  |
| Sfmbt1    | 1.78075  | 1.51922  | -0.229157   | 0.22355  | 0.365703    | no  |
| Sfmbt2    | 0.669232 | 1.19669  | 0.838471    | 0.0024   | 0.00784462  | yes |
| Sfn       | 32.0825  | 33.6356  | 0.0682021   | 0.6542   | 0.782716    | no  |
| Sfpq      | 171.141  | 188.226  | 0.137277    | 0.34985  | 0.507202    | no  |
| Sfr1      | 71.2668  | 70.6635  | -0.0122647  | 0.92935  | 0.9614      | no  |
| Sfswap    | 25.446   | 25.407   | -0.00221096 | 0.9868   | 0.992339    | no  |
| Sft2d1    | 82.7362  | 74.6259  | -0.148842   | 0.4106   | 0.569505    | no  |

|          |         |         |             |          |             |     |
|----------|---------|---------|-------------|----------|-------------|-----|
| Sft2d2   | 17.0911 | 18.1878 | 0.0897282   | 0.5356   | 0.685944    | no  |
| Sft2d3   | 2.51445 | 2.44006 | -0.043326   | 0.8488   | 0.913762    | no  |
| Sfxn1    | 28.0474 | 29.1332 | 0.054796    | 0.7073   | 0.82111     | no  |
| Sfxn2    | 4.5115  | 4.06599 | -0.149999   | 0.4231   | 0.581506    | no  |
| Sfxn3    | 42.1309 | 38.5585 | -0.127831   | 0.3748   | 0.5335      | no  |
| Sgcb     | 6.49302 | 5.35648 | -0.277606   | 0.1042   | 0.199903    | no  |
| Sgk1     | 97.4997 | 85.777  | -0.184807   | 0.19915  | 0.335051    | no  |
| Sgk3     | 2.31906 | 2.80211 | 0.272976    | 0.1439   | 0.258389    | no  |
| Sgms1    | 19.4662 | 31.3661 | 0.688235    | 5.00E-05 | 0.000236281 | yes |
| Sgol1    | 6.65195 | 3.81276 | -0.80294    | 5.00E-05 | 0.000236281 | yes |
| Sgol2    | 4.47954 | 2.69982 | -0.730489   | 1.00E-04 | 0.000450026 | yes |
| Sgpl1    | 19.6934 | 18.4218 | -0.0963002  | 0.51355  | 0.666496    | no  |
| Sgpp1    | 24.0945 | 23.6797 | -0.025054   | 0.8638   | 0.923153    | no  |
| Sgsh     | 13.3417 | 17.1614 | 0.363227    | 0.0129   | 0.0341475   | yes |
| Sgsm2    | 2.0782  | 2.24377 | 0.110585    | 0.57725  | 0.720894    | no  |
| Sgsm3    | 1.96507 | 1.98731 | 0.0162338   | 0.98735  | 0.992652    | no  |
| Sgta     | 39.8033 | 39.7327 | -0.00256086 | 0.9854   | 0.991539    | no  |
| Sh2b1    | 62.3286 | 64.1512 | 0.0415818   | 0.7714   | 0.86491     | no  |
| Sh2b3    | 14.3163 | 15.8922 | 0.15066     | 0.3271   | 0.482505    | no  |
| Sh2d1a   | 185.347 | 176.532 | -0.0703044  | 0.6265   | 0.760899    | no  |
| Sh2d2a   | 76.1066 | 67.5214 | -0.172676   | 0.2199   | 0.361113    | no  |
| Sh2d3c   | 108.651 | 99.3562 | -0.129015   | 0.3632   | 0.521415    | no  |
| Sh2d5    | 1.06193 | 2.071   | 0.963636    | 0.00065  | 0.00244919  | yes |
| Sh3bgrl  | 43.4909 | 43.3882 | -0.0034127  | 0.9817   | 0.989495    | no  |
| Sh3bgrl3 | 1356.58 | 1192.3  | -0.186223   | 0.20375  | 0.340873    | no  |
| Sh3bp1   | 70.3156 | 72.5519 | 0.0451668   | 0.751    | 0.851219    | no  |
| Sh3bp2   | 9.14032 | 6.48899 | -0.494251   | 0.004    | 0.0123078   | yes |
| Sh3bp5   | 15.3885 | 26.5106 | 0.784721    | 5.00E-05 | 0.000236281 | yes |
| Sh3bp5l  | 12.1238 | 11.5128 | -0.0745957  | 0.63505  | 0.767782    | no  |
| Sh3gl1   | 85.6929 | 78.5253 | -0.126018   | 0.4751   | 0.631445    | no  |
| Sh3glb1  | 46.4318 | 40.304  | -0.20419    | 0.18225  | 0.312435    | no  |
| Sh3glb2  | 38.6298 | 36.6836 | -0.0745791  | 0.6161   | 0.752867    | no  |
| Sh3kbp1  | 131.515 | 136.162 | 0.0501022   | 0.7294   | 0.836135    | no  |
| Sh3rf1   | 1.9133  | 1.66622 | -0.199483   | 0.32955  | 0.485176    | no  |
| Sharpin  | 54.8093 | 54.4454 | -0.00961218 | 0.94925  | 0.972663    | no  |
| Shc1     | 38.0353 | 37.7307 | -0.0115991  | 0.93525  | 0.964803    | no  |
| Shcbp1   | 11.8167 | 6.04519 | -0.966973   | 5.00E-05 | 0.000236281 | yes |
| Shf      | 1.67799 | 1.54854 | -0.115832   | 0.71565  | 0.826832    | no  |
| Shfm1    | 384.213 | 371.399 | -0.0489371  | 0.7335   | 0.839077    | no  |
| Shisa5   | 955.196 | 1015.75 | 0.0886696   | 0.5637   | 0.709508    | no  |
| Shkbp1   | 41.0356 | 40.4377 | -0.0211752  | 0.8857   | 0.936042    | no  |
| Shmt1    | 2.91907 | 2.73062 | -0.096281   | 0.69235  | 0.810692    | no  |
| Shmt2    | 31.7526 | 34.8201 | 0.133042    | 0.3582   | 0.516064    | no  |
| Shoc2    | 15.5592 | 15.2292 | -0.0309254  | 0.9316   | 0.962642    | no  |
| Shpk     | 3.67049 | 3.78008 | 0.0424439   | 0.82985  | 0.902323    | no  |
| Shprh    | 6.50756 | 6.46404 | -0.00968044 | 0.94955  | 0.972844    | no  |
| Shq1     | 2.61983 | 2.8736  | 0.133383    | 0.58725  | 0.729368    | no  |
| Siae     | 5.19376 | 5.71604 | 0.138238    | 0.4371   | 0.59507     | no  |
| Siah1a   | 11.203  | 11.4115 | 0.0266101   | 0.87125  | 0.927688    | no  |
| Siah1b   | 2.16269 | 2.02229 | -0.0968411  | 0.73455  | 0.839952    | no  |
| Siah2    | 14.8371 | 15.4031 | 0.0540102   | 0.72955  | 0.836253    | no  |
| Sidt1    | 88.2607 | 119.083 | 0.43213     | 0.00205  | 0.00681807  | yes |
| Sidt2    | 78.1366 | 77.9153 | -0.00409224 | 0.9778   | 0.987609    | no  |
| Sigirr   | 38.0119 | 40.9753 | 0.108304    | 0.45     | 0.60743     | no  |
| Sigmar1  | 9.28881 | 11.8576 | 0.352241    | 0.0512   | 0.110945    | no  |
| Sik1     | 10.1272 | 12.1918 | 0.267675    | 0.0792   | 0.159257    | no  |
| Sik2     | 6.20119 | 6.42231 | 0.0505478   | 0.8587   | 0.920085    | no  |

|              |         |          |             |          |             |     |
|--------------|---------|----------|-------------|----------|-------------|-----|
| Sik3         | 18.2729 | 18.4545  | 0.0142712   | 0.91985  | 0.95631     | no  |
| Sike1        | 55.4431 | 44.8899  | -0.304618   | 0.03295  | 0.0763493   | no  |
| Sil1         | 4.63881 | 5.45839  | 0.234721    | 0.2695   | 0.417265    | no  |
| Simc1        | 1.98517 | 2.07794  | 0.0658899   | 0.86755  | 0.925479    | no  |
| Sin3a        | 22.2308 | 21.1361  | -0.0728511  | 0.61065  | 0.748228    | no  |
| Sin3b        | 120.066 | 112.834  | -0.0896355  | 0.5841   | 0.726773    | no  |
| Sipa1        | 129.283 | 132.528  | 0.0357622   | 0.80515  | 0.887012    | no  |
| Sipa1l1      | 9.34298 | 13.768   | 0.559361    | 1.00E-04 | 0.000450026 | yes |
| Sipa1l2      | 1.09691 | 0.996826 | -0.138028   | 0.54475  | 0.693497    | no  |
| Sipa1l3      | 5.65813 | 6.23788  | 0.140731    | 0.35385  | 0.511446    | no  |
| Sirt1        | 16.2088 | 16.282   | 0.0065004   | 0.96425  | 0.98056     | no  |
| Sirt2        | 77.913  | 69.9076  | -0.156415   | 0.28725  | 0.437785    | no  |
| Sirt3        | 13.8076 | 13.0331  | -0.0832871  | 0.8668   | 0.924931    | no  |
| Sirt4        | 3.1745  | 3.22636  | 0.0233792   | 0.9254   | 0.959282    | no  |
| Sirt5        | 2.68966 | 2.96402  | 0.140132    | 0.61035  | 0.747977    | no  |
| Sirt6        | 15.2215 | 16.3476  | 0.102966    | 0.53875  | 0.688416    | no  |
| Sirt7        | 117.064 | 117.232  | 0.00207472  | 0.98755  | 0.99274     | no  |
| Sit1         | 38.3187 | 45.0811  | 0.234477    | 0.12475  | 0.231251    | no  |
| Siva1        | 21.0299 | 16.8343  | -0.321039   | 0.10345  | 0.198724    | no  |
| Ska1         | 4.24428 | 2.37981  | -0.834671   | 1.00E-04 | 0.000450026 | yes |
| Ska2         | 16.4342 | 13.4746  | -0.286458   | 0.10525  | 0.201529    | no  |
| Ska3         | 7.8421  | 4.34691  | -0.85125    | 5.00E-05 | 0.000236281 | yes |
| Skap1        | 126.682 | 129.638  | 0.0332819   | 0.8124   | 0.891562    | no  |
| Skap2        | 9.4548  | 9.17856  | -0.042779   | 0.82235  | 0.897707    | no  |
| Ski          | 20.9766 | 22.6421  | 0.110232    | 0.4463   | 0.603972    | no  |
| Skil         | 6.77147 | 7.93188  | 0.228194    | 0.1291   | 0.237679    | no  |
| Skiv2l       | 54.5332 | 54.2196  | -0.00832033 | 0.9518   | 0.974159    | no  |
| Skiv2l2      | 25.5975 | 23.8295  | -0.103258   | 0.47415  | 0.630574    | no  |
| Skp1a        | 84.809  | 92.9498  | 0.132235    | 0.3581   | 0.515972    | no  |
| Skp2         | 1.53435 | 1.22254  | -0.327747   | 0.338    | 0.494358    | no  |
| Sla          | 193.188 | 157.525  | -0.294426   | 0.0403   | 0.0906108   | no  |
| Sla2         | 45.3011 | 48.6153  | 0.101866    | 0.54525  | 0.693846    | no  |
| Slain1       | 29.663  | 27.9165  | -0.0875427  | 0.5531   | 0.700664    | no  |
| Slain2       | 25.0318 | 26.7203  | 0.0941706   | 0.50645  | 0.660293    | no  |
| Slamf1       | 15.1251 | 16.3798  | 0.114973    | 0.45015  | 0.607586    | no  |
| Slamf6       | 47.9473 | 65.7266  | 0.455029    | 0.00115  | 0.00407292  | yes |
| Slamf7       | 83.57   | 71.0894  | -0.23335    | 0.0954   | 0.185947    | no  |
| Slbp         | 68.3913 | 52.3592  | -0.38537    | 0.00675  | 0.0194405   | yes |
| Slc10a3      | 12.7953 | 11.6155  | -0.139563   | 0.5803   | 0.723525    | no  |
| Slc10a3-ubl4 | 14.5445 | 12.352   | -0.235729   | 0.4936   | 0.648366    | no  |
| Slc10a7      | 9.03923 | 8.98962  | -0.00793978 | 0.96065  | 0.978873    | no  |
| Slc11a2      | 15.387  | 25.8505  | 0.748485    | 5.00E-05 | 0.000236281 | yes |
| Slc12a2      | 1.80317 | 2.00982  | 0.156533    | 0.40095  | 0.55995     | no  |
| Slc12a4      | 11.7341 | 10.8347  | -0.11505    | 0.45225  | 0.609756    | no  |
| Slc12a6      | 20.7322 | 20.5265  | -0.0143855  | 0.92685  | 0.960151    | no  |
| Slc12a7      | 31.7842 | 29.3254  | -0.116161   | 0.41035  | 0.569315    | no  |
| Slc12a9      | 7.87002 | 7.69282  | -0.0328543  | 0.8385   | 0.907423    | no  |
| Slc14a1      | 5.50414 | 5.87239  | 0.0934296   | 0.59065  | 0.73211     | no  |
| Slc15a2      | 31.1022 | 20.5171  | -0.60019    | 5.00E-05 | 0.000236281 | yes |
| Slc15a3      | 1.44866 | 1.87483  | 0.372036    | 0.1846   | 0.315597    | no  |
| Slc15a4      | 9.70985 | 9.08181  | -0.0964691  | 0.56025  | 0.706678    | no  |
| Slc16a1      | 8.88093 | 10.9535  | 0.302605    | 0.05165  | 0.111748    | no  |
| Slc16a10     | 1.59332 | 2.30127  | 0.53039     | 0.0159   | 0.0408449   | yes |
| Slc16a13     | 2.20551 | 1.9505   | -0.17727    | 0.47335  | 0.629783    | no  |
| Slc16a3      | 2.66333 | 2.42175  | -0.137185   | 0.5483   | 0.696596    | no  |
| Slc16a6      | 18.6308 | 18.361   | -0.021039   | 0.88995  | 0.93838     | no  |
| Slc17a5      | 4.30405 | 4.54134  | 0.0774217   | 0.6766   | 0.799206    | no  |

|          |          |          |            |          |             |     |
|----------|----------|----------|------------|----------|-------------|-----|
| Slc17a9  | 26.1239  | 38.3384  | 0.553422   | 2.00E-04 | 0.0008488   | yes |
| Slc19a1  | 3.9634   | 4.59035  | 0.211864   | 0.29515  | 0.446671    | no  |
| Slc19a2  | 2.79837  | 2.24418  | -0.318397  | 0.12595  | 0.233047    | no  |
| Slc1a5   | 145.559  | 160.084  | 0.137222   | 0.3337   | 0.489631    | no  |
| Slc20a1  | 166.423  | 145.081  | -0.197997  | 0.1759   | 0.303577    | no  |
| Slc20a2  | 4.12315  | 3.77455  | -0.127443  | 0.60825  | 0.746168    | no  |
| Slc22a5  | 7.87076  | 7.16377  | -0.135786  | 0.4247   | 0.583103    | no  |
| Slc23a2  | 11.0726  | 9.32956  | -0.247118  | 0.09365  | 0.183123    | no  |
| Slc25a1  | 9.52594  | 8.76043  | -0.12086   | 0.51075  | 0.664022    | no  |
| Slc25a10 | 2.13     | 1.86182  | -0.194137  | 0.3664   | 0.524792    | no  |
| Slc25a11 | 57.994   | 54.8491  | -0.0804357 | 0.5749   | 0.718824    | no  |
| Slc25a12 | 28.1251  | 25.3633  | -0.149118  | 0.303    | 0.455659    | no  |
| Slc25a13 | 1.74247  | 1.775    | 0.0266805  | 0.9088   | 0.949752    | no  |
| Slc25a14 | 5.92455  | 5.09886  | -0.216532  | 0.3147   | 0.468532    | no  |
| Slc25a15 | 2.24839  | 2.56675  | 0.191052   | 0.3601   | 0.518114    | no  |
| Slc25a16 | 9.27778  | 9.14529  | -0.0207519 | 0.8972   | 0.942971    | no  |
| Slc25a17 | 31.1832  | 29.2717  | -0.0912624 | 0.5502   | 0.698193    | no  |
| Slc25a19 | 15.9557  | 17.3158  | 0.118013   | 0.4494   | 0.606806    | no  |
| Slc25a20 | 20.2477  | 19.504   | -0.0539857 | 0.73265  | 0.83858     | no  |
| Slc25a22 | 13.5498  | 15.0104  | 0.147683   | 0.34515  | 0.502038    | no  |
| Slc25a23 | 1.75284  | 1.89166  | 0.10996    | 0.64585  | 0.776106    | no  |
| Slc25a24 | 29.0318  | 32.5683  | 0.165832   | 0.24345  | 0.388338    | no  |
| Slc25a25 | 6.49703  | 6.83164  | 0.0724511  | 0.69935  | 0.815556    | no  |
| Slc25a26 | 2.51597  | 2.75619  | 0.131559   | 0.6473   | 0.777227    | no  |
| Slc25a27 | 0.979256 | 1.3347   | 0.446755   | 0.132    | 0.242071    | no  |
| Slc25a28 | 16.4975  | 16.1964  | -0.0265764 | 0.87555  | 0.930232    | no  |
| Slc25a29 | 3.44026  | 3.38482  | -0.0234381 | 0.9214   | 0.957217    | no  |
| Slc25a3  | 230.049  | 217.732  | -0.0793872 | 0.5795   | 0.722795    | no  |
| Slc25a30 | 20.1796  | 19.5631  | -0.0447609 | 0.7808   | 0.871077    | no  |
| Slc25a32 | 9.57549  | 9.13454  | -0.0680138 | 0.67865  | 0.800728    | no  |
| Slc25a33 | 11.5833  | 15.7884  | 0.44682    | 0.00795  | 0.022437    | yes |
| Slc25a35 | 3.90072  | 3.41284  | -0.192766  | 0.4425   | 0.600337    | no  |
| Slc25a36 | 11.4668  | 12.5963  | 0.135533   | 0.3847   | 0.543743    | no  |
| Slc25a37 | 12.8487  | 15.4226  | 0.263425   | 0.0788   | 0.158543    | no  |
| Slc25a38 | 27.7158  | 28.1282  | 0.0213094  | 0.8909   | 0.938922    | no  |
| Slc25a39 | 27.5058  | 27.8626  | 0.0185941  | 0.90185  | 0.945774    | no  |
| Slc25a4  | 204.701  | 202.553  | -0.0152229 | 0.91325  | 0.952493    | no  |
| Slc25a40 | 16.1787  | 15.7737  | -0.036575  | 0.80655  | 0.887792    | no  |
| Slc25a42 | 1.87979  | 2.10274  | 0.161698   | 0.49035  | 0.64537     | no  |
| Slc25a44 | 12.6856  | 11.9619  | -0.0847382 | 0.58555  | 0.727859    | no  |
| Slc25a45 | 47.6408  | 45.3219  | -0.0719898 | 0.62185  | 0.757245    | no  |
| Slc25a46 | 18.3788  | 18.1633  | -0.0170177 | 0.9088   | 0.949752    | no  |
| Slc25a5  | 415.574  | 390.116  | -0.0912023 | 0.52685  | 0.678158    | no  |
| Slc25a51 | 30.5458  | 27.8551  | -0.133034  | 0.34915  | 0.506457    | no  |
| Slc25a53 | 11.1688  | 10.776   | -0.0516547 | 0.8143   | 0.892523    | no  |
| Slc26a10 | 1.42768  | 1.51194  | 0.0827303  | 0.7752   | 0.86749     | no  |
| Slc26a11 | 12.3885  | 22.2324  | 0.843667   | 5.00E-05 | 0.000236281 | yes |
| Slc26a2  | 3.16308  | 3.40759  | 0.107418   | 0.56605  | 0.711425    | no  |
| Slc26a6  | 3.80286  | 4.21926  | 0.149904   | 0.4304   | 0.588708    | no  |
| Slc27a1  | 1.22695  | 1.95873  | 0.674836   | 0.01225  | 0.0326559   | yes |
| Slc27a3  | 1.04182  | 0.656542 | -0.666142  | 0.06535  | 0.135915    | no  |
| Slc27a4  | 14.891   | 13.1193  | -0.182754  | 0.2251   | 0.367608    | no  |
| Slc28a2  | 54.2772  | 48.0227  | -0.176629  | 0.2149   | 0.355174    | no  |
| Slc29a1  | 33.5829  | 25.4188  | -0.401834  | 0.007    | 0.0200761   | yes |
| Slc29a3  | 6.70186  | 5.84443  | -0.197498  | 0.22025  | 0.361536    | no  |
| Slc29a4  | 1.81537  | 2.11914  | 0.223219   | 0.36065  | 0.518725    | no  |
| Slc2a1   | 29.1067  | 31.021   | 0.0918905  | 0.5254   | 0.676934    | no  |

|          |         |          |             |          |           |     |
|----------|---------|----------|-------------|----------|-----------|-----|
| Slc2a3   | 46.7624 | 47.2934  | 0.0162909   | 0.9112   | 0.951255  | no  |
| Slc2a8   | 2.82326 | 3.92224  | 0.474314    | 0.04085  | 0.0916489 | no  |
| Slc2a9   | 2.22254 | 2.41715  | 0.121101    | 0.5589   | 0.705605  | no  |
| Slc30a1  | 5.1267  | 5.10131  | -0.00716218 | 0.96305  | 0.980074  | no  |
| Slc30a4  | 2.56647 | 3.49224  | 0.444367    | 0.0121   | 0.0323073 | yes |
| Slc30a5  | 20.1394 | 20.341   | 0.0143722   | 0.92335  | 0.958227  | no  |
| Slc30a6  | 8.6171  | 8.15252  | -0.0799562  | 0.6498   | 0.779129  | no  |
| Slc30a7  | 7.02049 | 6.92106  | -0.0205788  | 0.8903   | 0.938598  | no  |
| Slc30a9  | 22.749  | 22.1804  | -0.0365154  | 0.7973   | 0.882054  | no  |
| Slc31a1  | 3.6709  | 3.37021  | -0.123297   | 0.503    | 0.65713   | no  |
| Slc31a2  | 3.43918 | 3.43083  | -0.00350378 | 0.9877   | 0.992848  | no  |
| Slc33a1  | 10.419  | 9.1639   | -0.185178   | 0.24985  | 0.395366  | no  |
| Slc35a1  | 9.40702 | 9.93544  | 0.0788455   | 0.6533   | 0.782023  | no  |
| Slc35a2  | 12.9073 | 11.5229  | -0.163683   | 0.32305  | 0.478059  | no  |
| Slc35a3  | 13.6099 | 13.0754  | -0.0578079  | 0.69815  | 0.814789  | no  |
| Slc35a4  | 28.4994 | 27.4831  | -0.0523846  | 0.7466   | 0.848329  | no  |
| Slc35a5  | 4.39319 | 3.83795  | -0.194932   | 0.2772   | 0.426362  | no  |
| Slc35b1  | 41.4952 | 42.9892  | 0.0510287   | 0.7389   | 0.843136  | no  |
| Slc35b2  | 13.947  | 13.7421  | -0.0213518  | 0.8934   | 0.940434  | no  |
| Slc35b3  | 19.6917 | 20.0846  | 0.0285049   | 0.8574   | 0.919376  | no  |
| Slc35b4  | 12.0746 | 11.9559  | -0.0142524  | 0.9254   | 0.959282  | no  |
| Slc35c1  | 38.6482 | 43.4297  | 0.168278    | 0.2453   | 0.390416  | no  |
| Slc35c2  | 23.3484 | 24.7067  | 0.081577    | 0.596    | 0.736491  | no  |
| Slc35d1  | 3.33888 | 3.69975  | 0.148062    | 0.4617   | 0.618797  | no  |
| Slc35d2  | 17.334  | 14.8297  | -0.22511    | 0.15565  | 0.275354  | no  |
| Slc35e1  | 15.9815 | 17.6709  | 0.144967    | 0.31055  | 0.464096  | no  |
| Slc35e2  | 4.50584 | 4.33761  | -0.0548959  | 0.741    | 0.844386  | no  |
| Slc35e3  | 6.33022 | 6.30956  | -0.0047162  | 0.9777   | 0.987578  | no  |
| Slc35e4  | 3.3487  | 1.86016  | -0.848171   | 2.00E-04 | 0.0008488 | yes |
| Slc35f2  | 7.46644 | 8.01871  | 0.10295     | 0.5494   | 0.69758   | no  |
| Slc35f6  | 4.80003 | 4.82244  | 0.00672038  | 0.9699   | 0.983692  | no  |
| Slc35g1  | 8.18504 | 8.69231  | 0.0867499   | 0.59525  | 0.735925  | no  |
| Slc36a1  | 12.3104 | 12.3453  | 0.00409189  | 0.977    | 0.987224  | no  |
| Slc36a4  | 1.14796 | 1.28916  | 0.167364    | 0.6164   | 0.75309   | no  |
| Slc37a1  | 30.4632 | 30.7415  | 0.0131172   | 0.9303   | 0.961904  | no  |
| Slc37a2  | 1.04624 | 0.607923 | -0.783254   | 0.0067   | 0.0193115 | yes |
| Slc37a3  | 10.5395 | 11.4713  | 0.122221    | 0.4328   | 0.59104   | no  |
| Slc37a4  | 15.845  | 15.6206  | -0.0205796  | 0.8977   | 0.943244  | no  |
| Slc38a1  | 26.127  | 28.1855  | 0.109412    | 0.4416   | 0.599485  | no  |
| Slc38a10 | 37.467  | 36.5358  | -0.0363116  | 0.80635  | 0.88771   | no  |
| Slc38a2  | 32.7658 | 30.3356  | -0.111176   | 0.42725  | 0.585636  | no  |
| Slc38a6  | 3.59851 | 4.04684  | 0.169393    | 0.38075  | 0.539749  | no  |
| Slc38a7  | 4.40237 | 4.48341  | 0.0263146   | 0.8881   | 0.937245  | no  |
| Slc38a9  | 4.34633 | 4.25207  | -0.03163    | 0.8369   | 0.906539  | no  |
| Slc39a1  | 19.1394 | 18.9439  | -0.0148163  | 0.92095  | 0.957003  | no  |
| Slc39a10 | 4.46833 | 4.64642  | 0.0563828   | 0.741    | 0.844386  | no  |
| Slc39a11 | 3.52388 | 4.82131  | 0.45226     | 0.02015  | 0.0501845 | no  |
| Slc39a13 | 6.0362  | 5.83226  | -0.0495849  | 0.79745  | 0.882095  | no  |
| Slc39a14 | 3.0489  | 3.492    | 0.195764    | 0.2766   | 0.425634  | no  |
| Slc39a3  | 7.83119 | 7.56319  | -0.0502381  | 0.76095  | 0.857881  | no  |
| Slc39a4  | 6.18787 | 7.31662  | 0.241734    | 0.1897   | 0.322613  | no  |
| Slc39a6  | 15.9362 | 18.499   | 0.215141    | 0.145    | 0.25998   | no  |
| Slc39a7  | 62.0295 | 61.0407  | -0.023182   | 0.86675  | 0.924919  | no  |
| Slc39a9  | 14.0648 | 13.6739  | -0.0406628  | 0.7795   | 0.870328  | no  |
| Slc3a2   | 51.8186 | 56.1632  | 0.116154    | 0.41905  | 0.577683  | no  |
| Slc41a1  | 8.17675 | 8.01192  | -0.0293809  | 0.85335  | 0.916732  | no  |
| Slc43a1  | 2.3865  | 3.34127  | 0.485499    | 0.03085  | 0.0722327 | no  |

|          |         |         |             |          |             |     |
|----------|---------|---------|-------------|----------|-------------|-----|
| Slc43a2  | 9.49643 | 10.1005 | 0.0889641   | 0.54425  | 0.693135    | no  |
| Slc43a3  | 10.5032 | 7.41236 | -0.50283    | 0.00345  | 0.0108043   | yes |
| Slc44a1  | 1.79899 | 2.36108 | 0.392261    | 0.13495  | 0.246252    | no  |
| Slc44a2  | 155.588 | 132.958 | -0.226756   | 0.10955  | 0.208327    | no  |
| Slc45a4  | 4.81648 | 4.71485 | -0.0307678  | 0.85935  | 0.920307    | no  |
| Slc46a3  | 10.9169 | 10.2486 | -0.0911296  | 0.5889   | 0.730698    | no  |
| Slc48a1  | 17.684  | 15.6271 | -0.17839    | 0.74565  | 0.847673    | no  |
| Slc4a1ap | 15.5112 | 16.2105 | 0.0636213   | 0.6848   | 0.805334    | no  |
| Slc4a2   | 19.4069 | 18.2349 | -0.0898641  | 0.54335  | 0.692451    | no  |
| Slc4a7   | 16.4698 | 20.4496 | 0.312252    | 0.02885  | 0.068348    | no  |
| Slc4a8   | 1.71131 | 1.42458 | -0.264565   | 0.12775  | 0.235716    | no  |
| Slc50a1  | 102.721 | 102.02  | -0.00987814 | 0.94545  | 0.970455    | no  |
| Slc52a2  | 6.23512 | 6.26108 | 0.00599413  | 0.9711   | 0.984179    | no  |
| Slc52a3  | 2.68771 | 2.32488 | -0.209221   | 0.3683   | 0.526883    | no  |
| Slc5a6   | 2.7044  | 2.19169 | -0.303261   | 0.86275  | 0.92238     | no  |
| Slc6a12  | 1.30422 | 1.617   | 0.310135    | 0.26125  | 0.407279    | no  |
| Slc6a13  | 379.971 | 637.913 | 0.747469    | 5.00E-05 | 0.000236281 | yes |
| Slc6a6   | 12.2671 | 11.3247 | -0.115317   | 0.42985  | 0.588138    | no  |
| Slc7a1   | 7.70785 | 7.5321  | -0.0332767  | 0.8204   | 0.896508    | no  |
| Slc7a5   | 7.43286 | 7.3312  | -0.0198679  | 0.9017   | 0.945645    | no  |
| Slc7a6   | 15.1699 | 16.4103 | 0.113396    | 0.4499   | 0.607341    | no  |
| Slc7a6os | 34.4569 | 37.0969 | 0.106505    | 0.4819   | 0.637505    | no  |
| Slc8b1   | 10.9342 | 11.8865 | 0.120473    | 0.45     | 0.60743     | no  |
| Slc9a1   | 20.427  | 20.7027 | 0.0193441   | 0.88935  | 0.937989    | no  |
| Slc9a3r1 | 195.879 | 177.063 | -0.145696   | 0.30315  | 0.455807    | no  |
| Slc9a6   | 5.82325 | 4.35955 | -0.417645   | 0.0122   | 0.0325386   | yes |
| Slc9a7   | 13.5129 | 13.2644 | -0.0267772  | 0.86845  | 0.926062    | no  |
| Slc9a8   | 13.4822 | 13.4989 | 0.00177898  | 0.98995  | 0.993893    | no  |
| Slc9a9   | 19.3202 | 25.9657 | 0.426496    | 0.0035   | 0.010941    | yes |
| Slco3a1  | 57.5483 | 55.5982 | -0.0497351  | 0.7328   | 0.838711    | no  |
| Slco4a1  | 1.82126 | 1.95972 | 0.10571     | 0.6629   | 0.789178    | no  |
| Sln1     | 46.7229 | 30.1165 | -0.633579   | 5.00E-05 | 0.000236281 | yes |
| Sln2     | 206.248 | 195.235 | -0.0791695  | 0.57365  | 0.717782    | no  |
| Sln3     | 5.33928 | 4.09413 | -0.383087   | 0.0762   | 0.154209    | no  |
| Sln5     | 2.76973 | 4.91578 | 0.827674    | 5.00E-05 | 0.000236281 | yes |
| Sln8     | 17.0238 | 18.161  | 0.0932861   | 0.53135  | 0.682147    | no  |
| Sln9     | 3.58157 | 2.90565 | -0.301731   | 0.1109   | 0.210401    | no  |
| Slnp     | 59.0704 | 54.2566 | -0.122637   | 0.82035  | 0.896495    | no  |
| Slk      | 33.9916 | 34.2079 | 0.00914766  | 0.94555  | 0.970464    | no  |
| Slmap    | 18.5512 | 19.8124 | 0.0948939   | 0.5092   | 0.66269     | no  |
| Slmo2    | 44.6225 | 42.6289 | -0.0659406  | 0.66195  | 0.78854     | no  |
| Sltm     | 50.3497 | 47.2409 | -0.0919493  | 0.51275  | 0.665813    | no  |
| Slu7     | 34.4311 | 31.4816 | -0.129206   | 0.3711   | 0.529654    | no  |
| Slx1b    | 3.36518 | 3.07983 | -0.127833   | 0.5074   | 0.661043    | no  |
| Slx4     | 11.8898 | 11.5172 | -0.045934   | 0.74965  | 0.850399    | no  |
| Slx4ip   | 3.70199 | 3.70843 | 0.00250445  | 0.99375  | 0.996079    | no  |
| Smad1    | 2.95892 | 3.88204 | 0.391744    | 0.0504   | 0.109514    | no  |
| Smad2    | 8.49458 | 7.89231 | -0.106095   | 0.4664   | 0.623262    | no  |
| Smad3    | 51.6275 | 46.251  | -0.158656   | 0.25995  | 0.405637    | no  |
| Smad4    | 34.892  | 34.9848 | 0.00383016  | 0.97815  | 0.987778    | no  |
| Smad5    | 4.44515 | 4.81592 | 0.115579    | 0.4693   | 0.625928    | no  |
| Smad7    | 22.9496 | 27.531  | 0.26259     | 0.06745  | 0.139379    | no  |
| Smadp1   | 82.7655 | 81.8359 | -0.0162961  | 0.9104   | 0.950781    | no  |
| Smadp2   | 157.432 | 189.04  | 0.263963    | 0.06515  | 0.135551    | no  |
| Smarca2  | 23.5999 | 23.5093 | -0.00555226 | 0.9723   | 0.984802    | no  |
| Smarca4  | 35.7726 | 34.4884 | -0.0527443  | 0.7136   | 0.825504    | no  |
| Smarca5  | 39.8419 | 37.7605 | -0.0774109  | 0.58     | 0.723253    | no  |

|          |         |         |              |          |             |     |
|----------|---------|---------|--------------|----------|-------------|-----|
| Smarcad1 | 5.83737 | 5.8722  | 0.00858372   | 0.95575  | 0.976347    | no  |
| Smarcal1 | 4.80077 | 4.79786 | -0.000877201 | 0.9963   | 0.997331    | no  |
| Smarcb1  | 40.7089 | 38.6781 | -0.0738278   | 0.62185  | 0.757245    | no  |
| Smarcc1  | 14.0188 | 16.4152 | 0.227662     | 0.11315  | 0.213745    | no  |
| Smarcc2  | 36.4099 | 35.2914 | -0.0450145   | 0.75685  | 0.854993    | no  |
| Smarcd1  | 19.7633 | 18.8841 | -0.0656493   | 0.6557   | 0.78378     | no  |
| Smarcd2  | 102.6   | 105.767 | 0.0438492    | 0.7602   | 0.857351    | no  |
| Smarce1  | 55.7083 | 56.5887 | 0.0226226    | 0.8716   | 0.92785     | no  |
| Smc1a    | 57.7274 | 55.3034 | -0.0618872   | 0.6584   | 0.785796    | no  |
| Smc2     | 21.8014 | 15.2078 | -0.519613    | 0.00015  | 0.000653255 | yes |
| Smc3     | 39.0035 | 35.7351 | -0.126261    | 0.3753   | 0.533986    | no  |
| Smc4     | 82.1307 | 74.6338 | -0.138092    | 0.32175  | 0.476635    | no  |
| Smc5     | 17.2141 | 15.6376 | -0.138572    | 0.33455  | 0.490511    | no  |
| Smc6     | 34.3436 | 32.0548 | -0.0994997   | 0.48155  | 0.637174    | no  |
| Smchd1   | 36.3337 | 32.6692 | -0.153378    | 0.2765   | 0.425527    | no  |
| Smco4    | 8.52932 | 16.1087 | 0.917336     | 5.00E-05 | 0.000236281 | yes |
| Smcr8    | 12.7935 | 13.224  | 0.0477432    | 0.74315  | 0.845934    | no  |
| Smdt1    | 205.744 | 196.966 | -0.0629031   | 0.66435  | 0.790038    | no  |
| Smek1    | 40.6714 | 42.4883 | 0.06305      | 0.6832   | 0.803975    | no  |
| Smek2    | 46.185  | 46.4463 | 0.0081367    | 0.9547   | 0.975769    | no  |
| Smg1     | 47.5299 | 56.4957 | 0.249306     | 0.0907   | 0.178382    | no  |
| Smg5     | 37.5555 | 37.15   | -0.0156603   | 0.91365  | 0.952699    | no  |
| Smg6     | 15.7998 | 16.4115 | 0.0547965    | 0.70535  | 0.819722    | no  |
| Smg7     | 26.5687 | 25.3287 | -0.0689566   | 0.63325  | 0.766367    | no  |
| Smg8     | 9.1431  | 8.84314 | -0.0481246   | 0.76645  | 0.861509    | no  |
| Smg9     | 30.6071 | 29.3592 | -0.0600533   | 0.6827   | 0.803655    | no  |
| Smim1    | 8.6114  | 8.62654 | 0.00253467   | 0.9949   | 0.996594    | no  |
| Smim11   | 68.9792 | 64.7068 | -0.0922454   | 0.5952   | 0.735889    | no  |
| Smim12   | 21.063  | 22.1333 | 0.0715062    | 0.68125  | 0.802671    | no  |
| Smim13   | 2.4331  | 2.64671 | 0.121406     | 0.53585  | 0.686139    | no  |
| Smim14   | 29.2004 | 27.2427 | -0.100123    | 0.5049   | 0.658941    | no  |
| Smim15   | 53.2711 | 47.2218 | -0.1739      | 0.2299   | 0.373244    | no  |
| Smim19   | 14.7217 | 14.3224 | -0.039664    | 0.8596   | 0.92049     | no  |
| Smim20   | 41.0788 | 36.2792 | -0.179254    | 0.2715   | 0.419551    | no  |
| Smim3    | 9.51662 | 9.98895 | 0.0698838    | 0.68545  | 0.805688    | no  |
| Smim7    | 21.8951 | 21.4207 | -0.0316008   | 0.8322   | 0.903735    | no  |
| Smim8    | 21.4779 | 20.1366 | -0.0930313   | 0.6055   | 0.744126    | no  |
| Smn1     | 23.0985 | 22.7716 | -0.0205658   | 0.9046   | 0.947419    | no  |
| Smndc1   | 65.5667 | 62.985  | -0.0579543   | 0.6825   | 0.80358     | no  |
| Smox     | 4.20995 | 5.25947 | 0.321112     | 0.1344   | 0.245503    | no  |
| Smpd1    | 30.1252 | 28.8312 | -0.0633373   | 0.6683   | 0.793065    | no  |
| Smpd2    | 14.1891 | 13.4559 | -0.0765486   | 0.66115  | 0.787959    | no  |
| Smpd4    | 11.7336 | 12.5208 | 0.0936786    | 0.5379   | 0.687841    | no  |
| Smpd5    | 6.53014 | 7.00328 | 0.100916     | 0.6603   | 0.787291    | no  |
| Smpdl3a  | 74.6374 | 74.2393 | -0.0077149   | 0.9591   | 0.977972    | no  |
| Smpdl3b  | 37.6808 | 20.5492 | -0.87475     | 5.00E-05 | 0.000236281 | yes |
| Sms      | 41.6938 | 44.2989 | 0.0874397    | 0.5383   | 0.688066    | no  |
| Smtn     | 3.86156 | 2.90531 | -0.410492    | 0.0358   | 0.0819417   | no  |
| Smu1     | 39.3737 | 37.7576 | -0.0604641   | 0.8352   | 0.905615    | no  |
| Smug1    | 2.86251 | 2.60626 | -0.135297    | 0.50425  | 0.658275    | no  |
| Smurf1   | 9.2349  | 8.08739 | -0.191421    | 0.2056   | 0.343301    | no  |
| Smurf2   | 7.2973  | 6.11153 | -0.255829    | 0.1053   | 0.201608    | no  |
| Smyd1    | 4.83848 | 4.25437 | -0.18561     | 0.3077   | 0.460939    | no  |
| Smyd2    | 3.04723 | 4.18123 | 0.456427     | 0.06285  | 0.131767    | no  |
| Smyd3    | 3.05741 | 3.41014 | 0.157524     | 0.40805  | 0.566937    | no  |
| Smyd4    | 3.71381 | 3.53983 | -0.0692185   | 0.70975  | 0.822804    | no  |
| Smyd5    | 4.01919 | 5.10658 | 0.345452     | 0.0786   | 0.158213    | no  |



|          |         |         |             |          |             |     |
|----------|---------|---------|-------------|----------|-------------|-----|
| Snai3    | 17.9061 | 23.5981 | 0.398219    | 0.01425  | 0.0371649   | yes |
| Snap23   | 21.0203 | 20.8262 | -0.0133899  | 0.9291   | 0.961226    | no  |
| Snap29   | 19.3084 | 16.9662 | -0.186564   | 0.4979   | 0.652242    | no  |
| Snap47   | 7.80508 | 6.75379 | -0.208716   | 0.27615  | 0.425118    | no  |
| Snapc1   | 12.896  | 13.3796 | 0.0531129   | 0.74505  | 0.847264    | no  |
| Snapc2   | 14.1924 | 12.7149 | -0.158598   | 0.3747   | 0.533444    | no  |
| Snapc3   | 19.4877 | 17.7714 | -0.133004   | 0.43285  | 0.591085    | no  |
| Snapc4   | 9.38358 | 10.9725 | 0.225682    | 0.14035  | 0.253569    | no  |
| Snapc5   | 80.4304 | 74.2421 | -0.115503   | 0.4427   | 0.600551    | no  |
| Snapin   | 27.4431 | 25.9962 | -0.0781457  | 0.7082   | 0.821722    | no  |
| Snd1     | 41.8114 | 43.5915 | 0.0601503   | 0.67025  | 0.794631    | no  |
| Snf8     | 87.9634 | 83.8896 | -0.0684101  | 0.6431   | 0.773988    | no  |
| Snip1    | 25.8414 | 24.96   | -0.0500668  | 0.74395  | 0.846545    | no  |
| Snrk     | 21.185  | 24.4997 | 0.209722    | 0.14335  | 0.257631    | no  |
| Snrnp200 | 46.3296 | 46.2513 | -0.00243976 | 0.9864   | 0.992008    | no  |
| Snrnp25  | 25.1066 | 23.5083 | -0.0948962  | 0.5983   | 0.738389    | no  |
| Snrnp27  | 49.7189 | 47.7905 | -0.0570689  | 0.72055  | 0.830278    | no  |
| Snrnp35  | 4.90783 | 4.58115 | -0.0993742  | 0.6984   | 0.81496     | no  |
| Snrnp40  | 55.6888 | 53.1577 | -0.0671091  | 0.63775  | 0.769754    | no  |
| Snrnp48  | 30.7871 | 30.0405 | -0.0354185  | 0.81435  | 0.892536    | no  |
| Snrnp70  | 212.626 | 211.226 | -0.00953215 | 0.94705  | 0.971396    | no  |
| Snrpa    | 51.2532 | 47.2106 | -0.11853    | 0.44775  | 0.605168    | no  |
| Snrpa1   | 36.7135 | 32.848  | -0.160501   | 0.3024   | 0.454989    | no  |
| Snrpb    | 212.511 | 203.384 | -0.0633313  | 0.6469   | 0.776945    | no  |
| Snrpb2   | 68.7039 | 68.8528 | 0.00312274  | 0.9815   | 0.989434    | no  |
| Snrpc    | 105.694 | 91.6821 | -0.205186   | 0.17135  | 0.297411    | no  |
| Snrpd1   | 75.502  | 60.2727 | -0.32501    | 0.03435  | 0.0790638   | no  |
| Snrpd2   | 277.505 | 256.201 | -0.115238   | 0.42535  | 0.583769    | no  |
| Snrpd3   | 226.332 | 220.733 | -0.0361403  | 0.80515  | 0.887012    | no  |
| Snrpe    | 384.936 | 353.076 | -0.12464    | 0.3861   | 0.545111    | no  |
| Snrpf    | 87.9343 | 89.8625 | 0.0312924   | 0.8421   | 0.90977     | no  |
| Snrpg    | 631.631 | 587.606 | -0.104233   | 0.46055  | 0.617772    | no  |
| Sntb1    | 13.1938 | 19.613  | 0.571947    | 0.00025  | 0.00103712  | yes |
| Sntb2    | 17.4454 | 23.2107 | 0.41194     | 0.00405  | 0.012441    | yes |
| Snupn    | 8.19286 | 8.63919 | 0.076529    | 0.70495  | 0.819514    | no  |
| Snw1     | 59.7639 | 59.2769 | -0.0118059  | 0.94145  | 0.968284    | no  |
| Snx1     | 59.9026 | 59.1531 | -0.018164   | 0.89845  | 0.943765    | no  |
| Snx10    | 56.0968 | 35.2253 | -0.671307   | 5.00E-05 | 0.000236281 | yes |
| Snx11    | 15.4186 | 13.872  | -0.152489   | 0.328    | 0.483549    | no  |
| Snx12    | 31.8772 | 29.0293 | -0.135015   | 0.4406   | 0.598519    | no  |
| Snx13    | 5.09371 | 5.42931 | 0.0920509   | 0.5601   | 0.70659     | no  |
| Snx14    | 27.7781 | 30.1497 | 0.118196    | 0.4111   | 0.569974    | no  |
| Snx15    | 12.9896 | 12.8779 | -0.0124557  | 0.9449   | 0.970135    | no  |
| Snx16    | 1.57219 | 2.08773 | 0.409162    | 0.1056   | 0.202062    | no  |
| Snx17    | 57.8774 | 55.326  | -0.0650422  | 0.8869   | 0.936623    | no  |
| Snx18    | 8.88403 | 6.54008 | -0.441906   | 0.006    | 0.0175533   | yes |
| Snx19    | 12.1718 | 12.8167 | 0.0744876   | 0.6127   | 0.749932    | no  |
| Snx2     | 57.7832 | 56.2572 | -0.0386112  | 0.79085  | 0.877973    | no  |
| Snx20    | 36.6317 | 33.92   | -0.110954   | 0.46925  | 0.625874    | no  |
| Snx21    | 1.37014 | 1.40808 | 0.0394045   | 0.9471   | 0.971419    | no  |
| Snx22    | 47.0363 | 46.0705 | -0.0299304  | 0.89975  | 0.944512    | no  |
| Snx25    | 15.1465 | 14.6977 | -0.0433921  | 0.77805  | 0.869301    | no  |
| Snx27    | 12.5136 | 11.2899 | -0.148467   | 0.31305  | 0.466774    | no  |
| Snx29    | 1.87721 | 1.75542 | -0.09678    | 0.70455  | 0.819184    | no  |
| Snx3     | 112.913 | 94.7195 | -0.253475   | 0.07495  | 0.152072    | no  |
| Snx30    | 1.63351 | 1.55403 | -0.0719635  | 0.7038   | 0.818541    | no  |
| Snx32    | 6.46008 | 7.44391 | 0.204508    | 0.3117   | 0.465361    | no  |

|          |          |          |             |          |             |     |
|----------|----------|----------|-------------|----------|-------------|-----|
| Snx33    | 4.00217  | 3.48018  | -0.201619   | 0.2591   | 0.404705    | no  |
| Snx4     | 80.8727  | 84.384   | 0.0613168   | 0.66285  | 0.789178    | no  |
| Snx5     | 200.813  | 174.323  | -0.204087   | 0.1583   | 0.279196    | no  |
| Snx6     | 53.131   | 51.1354  | -0.0552316  | 0.69795  | 0.814691    | no  |
| Snx8     | 1.27016  | 1.57265  | 0.308181    | 0.26265  | 0.408983    | no  |
| Snx9     | 2.0645   | 3.19035  | 0.62792     | 0.01385  | 0.0362772   | yes |
| Soat1    | 5.72312  | 7.76284  | 0.439783    | 0.00645  | 0.0186894   | yes |
| Soat2    | 16.0632  | 15.9963  | -0.00602906 | 0.96915  | 0.98329     | no  |
| Socs1    | 8.23612  | 11.5049  | 0.482217    | 0.0167   | 0.0426207   | yes |
| Socs2    | 1.51198  | 1.22866  | -0.299355   | 0.30695  | 0.46007     | no  |
| Socs3    | 9.13774  | 17.4203  | 0.93086     | 5.00E-05 | 0.000236281 | yes |
| Socs4    | 13.9299  | 12.9192  | -0.10867    | 0.50755  | 0.661177    | no  |
| Socs5    | 0.692984 | 1.10301  | 0.670558    | 0.01585  | 0.0407327   | yes |
| Socs6    | 6.14591  | 6.21588  | 0.0163331   | 0.9269   | 0.960189    | no  |
| Socs7    | 5.58152  | 5.48929  | -0.0240389  | 0.8792   | 0.932366    | no  |
| Sod1     | 320.98   | 286.277  | -0.165076   | 0.2423   | 0.387064    | no  |
| Sod2     | 10.6134  | 14.8214  | 0.481804    | 0.00185  | 0.00622713  | yes |
| Son      | 74.7646  | 76.7328  | 0.037488    | 0.79475  | 0.880461    | no  |
| Sorbs1   | 6.02648  | 5.72488  | -0.0740684  | 0.6364   | 0.768782    | no  |
| Sorbs3   | 1.50022  | 1.72372  | 0.200351    | 0.4571   | 0.614639    | no  |
| Sord     | 7.76403  | 2.89436  | -1.42356    | 5.00E-05 | 0.000236281 | yes |
| Sorl1    | 43.69    | 52.2191  | 0.257276    | 0.0697   | 0.143306    | no  |
| Sos1     | 5.84277  | 5.50337  | -0.0863391  | 0.5669   | 0.712088    | no  |
| Sos2     | 11.6983  | 13.0713  | 0.160114    | 0.27485  | 0.423578    | no  |
| Sowahc   | 1.57193  | 1.62146  | 0.0447569   | 0.8405   | 0.908779    | no  |
| Sp1      | 26.0199  | 26.8391  | 0.0447215   | 0.7539   | 0.852971    | no  |
| Sp100    | 412.834  | 333.16   | -0.309348   | 0.03265  | 0.0757811   | no  |
| Sp110    | 202.003  | 176.021  | -0.198626   | 0.21445  | 0.354638    | no  |
| Sp140    | 43.956   | 34.2118  | -0.361564   | 0.23825  | 0.383074    | no  |
| Sp2      | 34.4862  | 30.5895  | -0.172985   | 0.23335  | 0.377353    | no  |
| Sp3      | 53.0542  | 49.3156  | -0.105423   | 0.45925  | 0.616579    | no  |
| Sp4      | 18.336   | 18.2407  | -0.00751445 | 0.9563   | 0.97657     | no  |
| Spag1    | 4.37815  | 2.93233  | -0.578271   | 0.00465  | 0.0140505   | yes |
| Spag5    | 14.3863  | 8.29559  | -0.794278   | 5.00E-05 | 0.000236281 | yes |
| Spag7    | 45.3625  | 38.7601  | -0.226926   | 0.1422   | 0.256157    | no  |
| Spag9    | 12.2076  | 11.4972  | -0.0865053  | 0.5485   | 0.696775    | no  |
| Spast    | 15.8853  | 14.3763  | -0.144008   | 0.328    | 0.483549    | no  |
| Spata1   | 2.59624  | 2.13056  | -0.285187   | 0.4396   | 0.597586    | no  |
| Spata13  | 66.8863  | 59.7109  | -0.163717   | 0.253    | 0.397349    | no  |
| Spata2   | 14.0208  | 13.3245  | -0.0734875  | 0.8123   | 0.891508    | no  |
| Spata24  | 3.29811  | 3.26777  | -0.0133346  | 0.97175  | 0.984428    | no  |
| Spata2l  | 3.58856  | 3.63197  | 0.0173486   | 0.95945  | 0.978173    | no  |
| Spata5   | 9.84533  | 9.23619  | -0.0921413  | 0.57205  | 0.71639     | no  |
| Spata5l1 | 16.702   | 19.561   | 0.22796     | 0.18515  | 0.316361    | no  |
| Spata6   | 18.0657  | 19.2618  | 0.0924886   | 0.5484   | 0.696673    | no  |
| Spc24    | 20.5324  | 11.0671  | -0.89162    | 5.00E-05 | 0.000236281 | yes |
| Spc25    | 18.5081  | 9.42697  | -0.973293   | 5.00E-05 | 0.000236281 | yes |
| Spcs1    | 90.9283  | 91.0036  | 0.00119463  | 0.9932   | 0.995754    | no  |
| Spcs2    | 53.2945  | 51.3205  | -0.054452   | 0.6981   | 0.814744    | no  |
| Spcs3    | 38.9323  | 36.5719  | -0.09023    | 0.529    | 0.680194    | no  |
| Spdl1    | 4.398    | 2.99678  | -0.553434   | 0.01155  | 0.0310715   | yes |
| Specc1   | 1.0029   | 0.806013 | -0.315309   | 0.1679   | 0.292589    | no  |
| Specc1l  | 12.7206  | 13.9503  | 0.133132    | 0.35775  | 0.515657    | no  |
| Spef1    | 2.31761  | 1.95834  | -0.243006   | 0.3367   | 0.492875    | no  |
| Spef2    | 1.01261  | 1.57357  | 0.635971    | 0.0219   | 0.0539961   | no  |
| Spenn    | 13.0058  | 14.3621  | 0.143118    | 0.3697   | 0.528275    | no  |
| Spng11   | 11.9564  | 11.7089  | -0.0301887  | 0.88295  | 0.934535    | no  |

|          |         |          |             |          |             |     |
|----------|---------|----------|-------------|----------|-------------|-----|
| Spg20    | 3.83093 | 4.21425  | 0.137579    | 0.4555   | 0.613095    | no  |
| Spg21    | 33.7727 | 30.2391  | -0.159444   | 0.2748   | 0.42352     | no  |
| Spg7     | 31.5868 | 32.7751  | 0.0532791   | 0.71855  | 0.828704    | no  |
| Sphk2    | 12.99   | 14.0368  | 0.111814    | 0.48155  | 0.637174    | no  |
| Spice1   | 17.2234 | 15.7967  | -0.124749   | 0.3934   | 0.552488    | no  |
| Spidr    | 4.58395 | 4.35521  | -0.073849   | 0.68755  | 0.807196    | no  |
| Spin1    | 16.8352 | 16.2528  | -0.0507945  | 0.7202   | 0.829997    | no  |
| Spin2c   | 1.693   | 1.76819  | 0.0626926   | 0.85315  | 0.916587    | no  |
| Spint2   | 20.0895 | 38.051   | 0.921494    | 5.00E-05 | 0.000236281 | yes |
| Spn      | 418.202 | 353.477  | -0.242583   | 0.13755  | 0.24977     | no  |
| Spns1    | 20.3562 | 19.4673  | -0.0644145  | 0.6717   | 0.795562    | no  |
| Spop     | 42.3754 | 44.8439  | 0.0816846   | 0.56745  | 0.712487    | no  |
| Spopl    | 6.26883 | 6.00432  | -0.0621942  | 0.73015  | 0.836709    | no  |
| Sppi2a   | 24.7149 | 22.8078  | -0.115856   | 0.4123   | 0.571111    | no  |
| Sppi2b   | 15.4371 | 16.6747  | 0.111261    | 0.4713   | 0.627789    | no  |
| Sppi3    | 47.0103 | 42.3818  | -0.14953    | 0.2991   | 0.451236    | no  |
| Spr      | 20.9114 | 25.7265  | 0.298965    | 0.0704   | 0.144493    | no  |
| Spred2   | 2.8569  | 3.70139  | 0.373615    | 0.07465  | 0.151542    | no  |
| Sprtn    | 13.4947 | 13.4976  | 0.000311288 | 0.99675  | 0.997655    | no  |
| Spry2    | 4.60413 | 5.3468   | 0.215748    | 0.28365  | 0.43374     | no  |
| Spryd3   | 32.3879 | 33.8354  | 0.0630796   | 0.66305  | 0.78925     | no  |
| Spryd4   | 4.77812 | 4.24725  | -0.169916   | 0.4525   | 0.610058    | no  |
| Spryd7   | 5.69961 | 6.81037  | 0.25687     | 0.2067   | 0.344754    | no  |
| Spsb2    | 3.57323 | 3.14312  | -0.185029   | 0.78235  | 0.872213    | no  |
| Spsb3    | 46.3842 | 47.1951  | 0.0250029   | 0.8661   | 0.924505    | no  |
| Sptan1   | 79.7386 | 81.708   | 0.0351996   | 0.809    | 0.889504    | no  |
| Sptbn1   | 35.9525 | 38.3039  | 0.091399    | 0.5135   | 0.66648     | no  |
| Sptlc1   | 25.0074 | 25.5663  | 0.0318856   | 0.8245   | 0.898984    | no  |
| Sptlc2   | 31.1594 | 28.7161  | -0.117809   | 0.41225  | 0.571075    | no  |
| Sptssa   | 55.4837 | 50.8423  | -0.126036   | 0.38595  | 0.544964    | no  |
| Spty2d1  | 26.311  | 26.0875  | -0.0123024  | 0.9305   | 0.96204     | no  |
| Sqle     | 6.92748 | 7.1531   | 0.0462367   | 0.79545  | 0.880835    | no  |
| Sqstm1   | 100.243 | 102.662  | 0.034401    | 0.8063   | 0.887697    | no  |
| Sra1     | 62.1658 | 57.0054  | -0.125022   | 0.4105   | 0.569445    | no  |
| Srbd1    | 11.9386 | 9.97158  | -0.259746   | 0.0962   | 0.187269    | no  |
| Srcin1   | 1.18807 | 0.168012 | -2.82198    | 5.00E-05 | 0.000236281 | yes |
| Srd5a3   | 30.5515 | 29.5426  | -0.0484477  | 0.7504   | 0.850866    | no  |
| Sreb1    | 28.5389 | 30.1792  | 0.0806288   | 0.66635  | 0.79163     | no  |
| Sreb2    | 51.7563 | 61.5846  | 0.250835    | 0.075    | 0.152156    | no  |
| Srek1    | 12.1526 | 12.04    | -0.0134277  | 0.9295   | 0.961471    | no  |
| Srek1ip1 | 7.84926 | 8.12755  | 0.0502639   | 0.78635  | 0.874932    | no  |
| Srf      | 46.8825 | 48.5231  | 0.049622    | 0.72525  | 0.833395    | no  |
| Srfbp1   | 14.5146 | 15.7547  | 0.118282    | 0.5026   | 0.656704    | no  |
| Srgap2   | 13.5274 | 13.2334  | -0.0317009  | 0.82085  | 0.89675     | no  |
| Srgn     | 564.31  | 555.448  | -0.0228347  | 0.8702   | 0.927017    | no  |
| Sri      | 114.252 | 114.746  | 0.00621431  | 0.9633   | 0.980229    | no  |
| Srm      | 11.4653 | 13.2054  | 0.203851    | 0.2651   | 0.411971    | no  |
| Srp14    | 180.606 | 172.08   | -0.0697623  | 0.62605  | 0.760575    | no  |
| Srp19    | 111.711 | 94.7043  | -0.238269   | 0.1022   | 0.196772    | no  |
| Srp54a   | 1.20594 | 1.14754  | -0.0716113  | 0.7779   | 0.869229    | no  |
| Srp54b   | 1.54571 | 1.67506  | 0.115948    | 0.75245  | 0.852029    | no  |
| Srp54c   | 6.7409  | 6.06883  | -0.151524   | 0.45775  | 0.615197    | no  |
| Srp68    | 56.2403 | 54.0197  | -0.0581182  | 0.6783   | 0.800478    | no  |
| Srp72    | 53.1742 | 50.8449  | -0.064624   | 0.64665  | 0.776737    | no  |
| Srp9     | 82.2022 | 74.8443  | -0.135285   | 0.3443   | 0.501163    | no  |
| Srpk1    | 82.206  | 108.021  | 0.393998    | 0.00575  | 0.0169187   | yes |
| Srpk2    | 19.167  | 20.403   | 0.090155    | 0.7397   | 0.843531    | no  |

|            |         |         |             |          |             |     |
|------------|---------|---------|-------------|----------|-------------|-----|
| Srpr       | 57.1084 | 53.7273 | -0.0880488  | 0.5541   | 0.701528    | no  |
| Srprb      | 14.9434 | 15.1708 | 0.0217888   | 0.88905  | 0.937855    | no  |
| Srr        | 6.81713 | 7.1391  | 0.0665757   | 0.78055  | 0.870963    | no  |
| Srrd       | 17.6788 | 16.5634 | -0.0940177  | 0.7834   | 0.872957    | no  |
| Srrm1      | 66.8001 | 66.886  | 0.0018552   | 0.98955  | 0.993761    | no  |
| Srrm2      | 114.438 | 122.3   | 0.0958522   | 0.5356   | 0.685944    | no  |
| Srrt       | 71.7959 | 75.2147 | 0.0671136   | 0.6354   | 0.768008    | no  |
| Srsf1      | 53.2161 | 47.8403 | -0.153636   | 0.2783   | 0.427709    | no  |
| Srsf10     | 51.6774 | 46.9714 | -0.13775    | 0.33275  | 0.488481    | no  |
| Srsf11     | 75.7401 | 74.5225 | -0.0233809  | 0.8705   | 0.927099    | no  |
| Srsf2      | 153.749 | 143.096 | -0.103589   | 0.4653   | 0.622275    | no  |
| Srsf3      | 131.784 | 121.901 | -0.112466   | 0.4336   | 0.591846    | no  |
| Srsf4      | 16.9658 | 14.9947 | -0.178176   | 0.48715  | 0.642368    | no  |
| Srsf5      | 405.763 | 410.445 | 0.0165504   | 0.91205  | 0.951748    | no  |
| Srsf6      | 84.9043 | 88.7622 | 0.0641088   | 0.64735  | 0.777247    | no  |
| Srsf7      | 93.6836 | 87.5659 | -0.0974284  | 0.49275  | 0.64749     | no  |
| Srsf9      | 38.5138 | 36.5186 | -0.0767418  | 0.6198   | 0.755739    | no  |
| Ss18       | 57.7687 | 57.7179 | -0.00126912 | 0.9927   | 0.99545     | no  |
| Ss18l1     | 1.16233 | 1.55836 | 0.423008    | 0.074    | 0.150438    | no  |
| Ssb        | 121.458 | 115.194 | -0.0763834  | 0.59845  | 0.738535    | no  |
| Ssbp1      | 29.1953 | 28.3408 | -0.042857   | 0.79365  | 0.87967     | no  |
| Ssbp3      | 30.7941 | 40.0968 | 0.380832    | 0.0067   | 0.0193115   | yes |
| Ssbp4      | 78.0099 | 81.4745 | 0.0626919   | 0.65815  | 0.785591    | no  |
| Ssfa2      | 5.96234 | 5.6137  | -0.0869275  | 0.5931   | 0.734205    | no  |
| Ssh1       | 11.0029 | 9.38631 | -0.22926    | 0.15115  | 0.268876    | no  |
| Ssh2       | 19.713  | 28.2801 | 0.520635    | 2.00E-04 | 0.0008488   | yes |
| Ssh3       | 6.69094 | 9.57198 | 0.516609    | 0.00255  | 0.00827285  | yes |
| Ssna1      | 82.2198 | 77.4243 | -0.0866987  | 0.5682   | 0.713137    | no  |
| Ssr1       | 16.2882 | 16.1533 | -0.0120022  | 0.93465  | 0.964438    | no  |
| Ssr2       | 77.7597 | 70.5502 | -0.140372   | 0.3372   | 0.493423    | no  |
| Ssr3       | 83.0525 | 78.9375 | -0.0733119  | 0.60145  | 0.741046    | no  |
| Ssr4       | 105.699 | 100.197 | -0.0771354  | 0.60765  | 0.745782    | no  |
| Ssrp1      | 97.952  | 87.6941 | -0.159596   | 0.26315  | 0.409626    | no  |
| Sssca1     | 16.2329 | 16.9031 | 0.0583664   | 0.7824   | 0.872255    | no  |
| Ssu72      | 65.1828 | 58.8843 | -0.146608   | 0.31455  | 0.468378    | no  |
| Ssx2ip     | 1.55333 | 1.3849  | -0.165586   | 0.49185  | 0.646548    | no  |
| St13       | 71.9894 | 69.9654 | -0.0411423  | 0.77745  | 0.869002    | no  |
| St14       | 2.27503 | 4.35454 | 0.936634    | 5.00E-05 | 0.000236281 | yes |
| St3gal1    | 38.4557 | 37.9542 | -0.0189387  | 0.89125  | 0.939137    | no  |
| St3gal2    | 1.04933 | 0.72384 | -0.535719   | 0.0478   | 0.104686    | no  |
| St3gal3    | 5.06695 | 5.08273 | 0.00448623  | 0.9805   | 0.988836    | no  |
| St3gal4    | 52.3352 | 42.1266 | -0.31305    | 0.117    | 0.219724    | no  |
| St3gal6    | 110.048 | 110.76  | 0.00931438  | 0.94775  | 0.97186     | no  |
| St6gal1    | 1.52714 | 4.18535 | 1.45451     | 5.00E-05 | 0.000236281 | yes |
| St6galnac4 | 12.1457 | 11.6994 | -0.0540066  | 0.719    | 0.829047    | no  |
| St6galnac6 | 3.89173 | 4.31814 | 0.149997    | 0.464    | 0.621066    | no  |
| St7        | 4.29122 | 4.79788 | 0.161008    | 0.43425  | 0.592447    | no  |
| St7l       | 5.04187 | 5.08821 | 0.0131984   | 0.9314   | 0.962533    | no  |
| St8sia4    | 19.7725 | 19.6844 | -0.0064404  | 0.9709   | 0.984084    | no  |
| Stag1      | 18.0529 | 16.4034 | -0.138232   | 0.33485  | 0.490798    | no  |
| Stag2      | 44.3318 | 42.6224 | -0.0567287  | 0.695    | 0.812483    | no  |
| Stam       | 7.27894 | 7.40692 | 0.0251463   | 0.87965  | 0.932594    | no  |
| Stam2      | 10.7233 | 10.0977 | -0.0867164  | 0.57815  | 0.721609    | no  |
| Stamp      | 10.148  | 10.4129 | 0.0371759   | 0.8279   | 0.901119    | no  |
| Stamppl1   | 11.5121 | 11.1858 | -0.0414783  | 0.80935  | 0.889695    | no  |
| Stap1      | 39.1635 | 41.1519 | 0.0714487   | 0.64955  | 0.778974    | no  |
| Star       | 1.30188 | 1.61888 | 0.314395    | 0.19035  | 0.32343     | no  |

|          |          |          |             |          |             |     |
|----------|----------|----------|-------------|----------|-------------|-----|
| Stard10  | 57.3519  | 51.3308  | -0.160017   | 0.28725  | 0.437785    | no  |
| Stard3   | 26.947   | 24.1163  | -0.160118   | 0.29475  | 0.446228    | no  |
| Stard3nl | 26.5641  | 30.4101  | 0.195073    | 0.21725  | 0.358094    | no  |
| Stard4   | 11.5291  | 10.5565  | -0.127154   | 0.42635  | 0.584743    | no  |
| Stard5   | 4.18096  | 4.56434  | 0.126572    | 0.5236   | 0.675404    | no  |
| Stard6   | 1.09104  | 0.913925 | -0.255556   | 0.74815  | 0.849325    | no  |
| Stard7   | 31.3678  | 33.2337  | 0.0833652   | 0.5544   | 0.701769    | no  |
| Stat1    | 63.5024  | 57.8197  | -0.135249   | 0.3395   | 0.495935    | no  |
| Stat2    | 17.0222  | 16.2478  | -0.0671738  | 0.6443   | 0.774903    | no  |
| Stat3    | 50.2352  | 49.4523  | -0.0226609  | 0.87655  | 0.930846    | no  |
| Stat4    | 103.4    | 100.694  | -0.038258   | 0.79535  | 0.880808    | no  |
| Stat5a   | 23.4246  | 24.4905  | 0.0641988   | 0.65605  | 0.783919    | no  |
| Stat5b   | 42.99    | 52.6573  | 0.292633    | 0.03805  | 0.0862719   | no  |
| Stat6    | 86.8646  | 90.6714  | 0.0618795   | 0.6762   | 0.798935    | no  |
| Stau1    | 14.9655  | 12.5812  | -0.250368   | 0.10415  | 0.199835    | no  |
| Steap3   | 0.824485 | 1.04117  | 0.336636    | 0.27665  | 0.425674    | no  |
| Stil     | 4.04219  | 2.30874  | -0.808029   | 5.00E-05 | 0.000236281 | yes |
| Stim1    | 51.0018  | 50.5048  | -0.0141274  | 0.91815  | 0.95519     | no  |
| Stim2    | 11.4165  | 12.2417  | 0.100689    | 0.50755  | 0.661177    | no  |
| Stip1    | 69.6893  | 64.3701  | -0.114547   | 0.4231   | 0.581506    | no  |
| Stk10    | 106.951  | 104.753  | -0.0299494  | 0.83655  | 0.906341    | no  |
| Stk11    | 60.0054  | 62.4174  | 0.0568553   | 0.71125  | 0.82392     | no  |
| Stk11ip  | 15.8317  | 16.5462  | 0.0636812   | 0.6635   | 0.789533    | no  |
| Stk16    | 21.7018  | 23.3688  | 0.106767    | 0.6473   | 0.777227    | no  |
| Stk17b   | 289.357  | 283.567  | -0.0291633  | 0.8427   | 0.910112    | no  |
| Stk19    | 30.0349  | 32.541   | 0.115621    | 0.47645  | 0.632679    | no  |
| Stk24    | 133.566  | 127.985  | -0.061577   | 0.6615   | 0.788123    | no  |
| Stk25    | 29.746   | 29.6788  | -0.00326292 | 0.9803   | 0.988747    | no  |
| Stk32c   | 7.7043   | 5.30567  | -0.538129   | 0.00765  | 0.0217092   | yes |
| Stk35    | 5.374    | 5.82073  | 0.115204    | 0.4714   | 0.627887    | no  |
| Stk38    | 110.225  | 111.883  | 0.0215453   | 0.87965  | 0.932594    | no  |
| Stk38l   | 2.69904  | 2.65622  | -0.0230706  | 0.90605  | 0.948291    | no  |
| Stk39    | 14.9936  | 14.1414  | -0.0844199  | 0.5816   | 0.724582    | no  |
| Stk4     | 115.628  | 109.586  | -0.0774388  | 0.58535  | 0.727687    | no  |
| Stk40    | 18.8299  | 17.8734  | -0.0752067  | 0.6135   | 0.750638    | no  |
| Stmn1    | 298.896  | 161.927  | -0.884298   | 5.00E-05 | 0.000236281 | yes |
| Stmn2    | 1.13847  | 0.953673 | -0.255533   | 0.46825  | 0.624929    | no  |
| Stoml1   | 9.72094  | 12.3745  | 0.348198    | 0.03715  | 0.0845382   | no  |
| Stoml2   | 30.2744  | 31.7635  | 0.0692726   | 0.65825  | 0.78567     | no  |
| Stra13   | 62.6113  | 52.3249  | -0.258925   | 0.11715  | 0.219935    | no  |
| Strada   | 17.6894  | 18.2047  | 0.0414301   | 0.78535  | 0.874329    | no  |
| Stradb   | 8.9485   | 8.11469  | -0.141111   | 0.4239   | 0.582231    | no  |
| Strap    | 55.2457  | 52.9487  | -0.0612653  | 0.662    | 0.788559    | no  |
| Strbp    | 1.19409  | 1.43255  | 0.262678    | 0.12     | 0.22423     | no  |
| Strip1   | 23.8988  | 22.8984  | -0.0616904  | 0.66855  | 0.793242    | no  |
| Strn     | 14.0905  | 13.0439  | -0.111346   | 0.4594   | 0.616698    | no  |
| Strn3    | 10.3465  | 10.6852  | 0.0464829   | 0.80295  | 0.885653    | no  |
| Strn4    | 31.4078  | 32.1488  | 0.033642    | 0.8356   | 0.90577     | no  |
| Stt3a    | 54.9932  | 51.0163  | -0.108294   | 0.45035  | 0.607809    | no  |
| Stt3b    | 25.0094  | 24.7712  | -0.0138034  | 0.92385  | 0.958492    | no  |
| Stub1    | 45.0055  | 43.1069  | -0.0621823  | 0.7072   | 0.821075    | no  |
| Stx11    | 19.0931  | 15.5666  | -0.294601   | 0.05845  | 0.124135    | no  |
| Stx12    | 15.214   | 12.9096  | -0.236954   | 0.1376   | 0.249835    | no  |
| Stx16    | 38.6211  | 40.3163  | 0.0619752   | 0.669    | 0.793616    | no  |
| Stx17    | 7.36218  | 7.22096  | -0.0279418  | 0.85795  | 0.919728    | no  |
| Stx18    | 10.2509  | 9.8798   | -0.0532003  | 0.7462   | 0.848025    | no  |
| Stx1a    | 9.02364  | 10.6422  | 0.238009    | 0.167    | 0.291517    | no  |

|          |         |          |             |          |             |     |
|----------|---------|----------|-------------|----------|-------------|-----|
| Stx2     | 10.4336 | 9.04815  | -0.205548   | 0.20385  | 0.341016    | no  |
| Stx4a    | 75.8622 | 73.0614  | -0.0542705  | 0.70845  | 0.821945    | no  |
| Stx5a    | 50.0379 | 50.6682  | 0.0180574   | 0.9001   | 0.944711    | no  |
| Stx6     | 24.0428 | 23.9902  | -0.00315612 | 0.9837   | 0.990506    | no  |
| Stx7     | 12.8689 | 12.5188  | -0.0397944  | 0.8022   | 0.885102    | no  |
| Stx8     | 7.47783 | 7.40164  | -0.0147754  | 0.9307   | 0.962092    | no  |
| Stxbp2   | 45.5399 | 44.692   | -0.0271142  | 0.84845  | 0.913526    | no  |
| Stxbp3a  | 24.2424 | 22.3806  | -0.115288   | 0.44145  | 0.599327    | no  |
| Stxbp5   | 8.79386 | 8.92481  | 0.0213239   | 0.88485  | 0.935578    | no  |
| Styx     | 13.5987 | 12.2044  | -0.156069   | 0.3734   | 0.532033    | no  |
| Sub1     | 119.422 | 102.257  | -0.223874   | 0.1121   | 0.212113    | no  |
| Sucla2   | 35.9101 | 33.4252  | -0.10345    | 0.48685  | 0.642032    | no  |
| Suclg1   | 62.5314 | 68.7392  | 0.136552    | 0.3481   | 0.505298    | no  |
| Suclg2   | 13.1907 | 12.1893  | -0.113903   | 0.4587   | 0.616145    | no  |
| Suco     | 17.8308 | 18.2508  | 0.0335822   | 0.8136   | 0.892116    | no  |
| Suds3    | 50.0159 | 47.615   | -0.0709704  | 0.6201   | 0.755957    | no  |
| Sufu     | 11.9713 | 12.1894  | 0.0260496   | 0.8561   | 0.918456    | no  |
| Supp1    | 32.0457 | 31.3785  | -0.0303524  | 0.8374   | 0.906858    | no  |
| Supp2    | 13.9113 | 13.6225  | -0.0302625  | 0.8529   | 0.9165      | no  |
| Sugt1    | 74.7081 | 73.8597  | -0.016477   | 0.90435  | 0.947228    | no  |
| Sult2b1  | 0.84468 | 1.24547  | 0.560212    | 0.21245  | 0.352156    | no  |
| Sumf1    | 10.8763 | 10.6298  | -0.0330735  | 0.843    | 0.910324    | no  |
| Sumf2    | 8.79059 | 9.75044  | 0.149507    | 0.4002   | 0.55919     | no  |
| Sumo1    | 121.512 | 115.972  | -0.0673218  | 0.6335   | 0.766551    | no  |
| Sumo2    | 390.373 | 344.367  | -0.180907   | 0.1949   | 0.329424    | no  |
| Sumo3    | 37.7295 | 31.2566  | -0.271533   | 0.0585   | 0.124212    | no  |
| Sun1     | 33.7878 | 30.8252  | -0.132391   | 0.3543   | 0.511887    | no  |
| Sun2     | 140.899 | 153.97   | 0.127985    | 0.3829   | 0.54198     | no  |
| Suox     | 14.4063 | 12.0425  | -0.258565   | 0.10935  | 0.208025    | no  |
| Supt16   | 32.3337 | 31.4607  | -0.039486   | 0.7889   | 0.876856    | no  |
| Supt20   | 60.7466 | 64.4071  | 0.0844156   | 0.54645  | 0.694959    | no  |
| Supt3    | 5.02542 | 5.41446  | 0.107574    | 0.8888   | 0.937703    | no  |
| Supt4a   | 304.402 | 286.187  | -0.0890212  | 0.53235  | 0.682884    | no  |
| Supt5    | 94.7481 | 94.2461  | -0.00766297 | 0.95495  | 0.975954    | no  |
| Supt6    | 31.6472 | 33.2564  | 0.0715547   | 0.609    | 0.746776    | no  |
| Supt7l   | 7.89628 | 6.98433  | -0.177051   | 0.30755  | 0.460764    | no  |
| Supv3l1  | 9.52808 | 9.26468  | -0.040444   | 0.821    | 0.896872    | no  |
| Surf1    | 61.0417 | 55.6594  | -0.133171   | 0.72355  | 0.832241    | no  |
| Surf2    | 31.2465 | 34.0193  | 0.122659    | 0.8009   | 0.884262    | no  |
| Surf4    | 108.077 | 106.206  | -0.0252019  | 0.8737   | 0.929049    | no  |
| Surf6    | 18.5853 | 21.192   | 0.189358    | 0.2087   | 0.347318    | no  |
| Susd1    | 1.22681 | 0.735196 | -0.738708   | 0.01275  | 0.0337909   | yes |
| Susd2    | 1.12737 | 0.905522 | -0.31614    | 0.2637   | 0.410265    | no  |
| Susd3    | 12.8013 | 11.7314  | -0.125919   | 0.5097   | 0.66306     | no  |
| Suv39h1  | 12.8785 | 10.6191  | -0.278304   | 0.0785   | 0.158043    | no  |
| Suv420h1 | 28.2259 | 30.0264  | 0.0892132   | 0.5382   | 0.688037    | no  |
| Suv420h2 | 17.2102 | 17.8778  | 0.0549012   | 0.72665  | 0.834446    | no  |
| Suz12    | 44.8884 | 39.5231  | -0.183647   | 0.1949   | 0.329424    | no  |
| Svil     | 12.4338 | 12.457   | 0.00268744  | 0.9861   | 0.99189     | no  |
| Swap70   | 10.4111 | 19.7076  | 0.920632    | 5.00E-05 | 0.000236281 | yes |
| Swi5     | 128.895 | 132.868  | 0.0437976   | 0.7642   | 0.860034    | no  |
| Swsap1   | 6.09021 | 6.66727  | 0.130603    | 0.507    | 0.660729    | no  |
| Swt1     | 9.23489 | 9.09811  | -0.0215279  | 0.89175  | 0.939411    | no  |
| Syap1    | 37.1227 | 32.8497  | -0.176421   | 0.21835  | 0.359311    | no  |
| Syce2    | 5.59968 | 4.73436  | -0.242177   | 0.7132   | 0.82519     | no  |
| Syf2     | 141.461 | 136.326  | -0.0533513  | 0.70455  | 0.819184    | no  |
| Sympk    | 44.7418 | 44.3365  | -0.0131287  | 0.92335  | 0.958227    | no  |

|         |         |         |             |          |             |     |
|---------|---------|---------|-------------|----------|-------------|-----|
| Syncrip | 53.0696 | 56.683  | 0.0950327   | 0.53985  | 0.689474    | no  |
| Syne2   | 1.82036 | 1.81245 | -0.00628259 | 0.96625  | 0.981604    | no  |
| Syne3   | 7.74736 | 8.38674 | 0.114405    | 0.45515  | 0.612858    | no  |
| Syngr2  | 45.1573 | 45.6641 | 0.0160984   | 0.9157   | 0.953738    | no  |
| Synj1   | 12.2271 | 12.5292 | 0.0352129   | 0.86585  | 0.92435     | no  |
| Synj2   | 1.75794 | 2.61542 | 0.573162    | 0.0184   | 0.0463692   | yes |
| Synj2bp | 7.05566 | 7.12493 | 0.0140946   | 0.92255  | 0.957904    | no  |
| Synrg   | 19.5195 | 18.9344 | -0.043906   | 0.75515  | 0.853866    | no  |
| Sypl    | 6.93693 | 7.14147 | 0.0419226   | 0.79055  | 0.877833    | no  |
| Sys1    | 57.3355 | 49.4145 | -0.214494   | 0.1401   | 0.253176    | no  |
| Syt11   | 11.6934 | 9.63462 | -0.279389   | 0.06965  | 0.143229    | no  |
| Sytl1   | 23.2205 | 30.6823 | 0.402009    | 0.0097   | 0.0267231   | yes |
| Sytl2   | 44.1607 | 37.2254 | -0.246476   | 0.08215  | 0.164212    | no  |
| Sytl3   | 58.4235 | 57.3709 | -0.0262276  | 0.8525   | 0.916196    | no  |
| Syvn1   | 18.2898 | 17.4212 | -0.0701931  | 0.7152   | 0.826529    | no  |
| Szrd1   | 31.8781 | 31.9224 | 0.00200296  | 0.98885  | 0.993467    | no  |
| Szt2    | 14.3675 | 14.8727 | 0.0498656   | 0.73125  | 0.837589    | no  |
| Tab1    | 10.8774 | 10.9105 | 0.00437949  | 0.9775   | 0.987475    | no  |
| Tab2    | 58.0699 | 58.6687 | 0.0148005   | 0.91515  | 0.953502    | no  |
| Tab3    | 5.32337 | 5.09876 | -0.0621939  | 0.69315  | 0.811261    | no  |
| Tacc1   | 38.8865 | 42.2832 | 0.120816    | 0.39555  | 0.554647    | no  |
| Tacc2   | 2.36796 | 4.61317 | 0.962112    | 5.00E-05 | 0.000236281 | yes |
| Tacc3   | 26.3671 | 17.4434 | -0.59606    | 5.00E-05 | 0.000236281 | yes |
| Taco1   | 10.7927 | 12.7742 | 0.243177    | 0.1905   | 0.323599    | no  |
| Tada1   | 26.46   | 27.4529 | 0.0531481   | 0.85145  | 0.91543     | no  |
| Tada2a  | 4.02541 | 3.8039  | -0.0816549  | 0.705    | 0.819531    | no  |
| Tada2b  | 8.32938 | 9.29113 | 0.157645    | 0.5118   | 0.664946    | no  |
| Tada3   | 21.4637 | 20.8455 | -0.042161   | 0.789    | 0.876912    | no  |
| Taf1    | 14.0244 | 12.8775 | -0.123085   | 0.39035  | 0.54944     | no  |
| Taf10   | 200.112 | 189.038 | -0.0821306  | 0.74825  | 0.849397    | no  |
| Taf11   | 27.2799 | 27.4587 | 0.00942046  | 0.9545   | 0.975691    | no  |
| Taf12   | 49.2916 | 45.6003 | -0.112297   | 0.452    | 0.609477    | no  |
| Taf13   | 30.9089 | 28.2406 | -0.130253   | 0.41205  | 0.570944    | no  |
| Taf15   | 116.072 | 119.82  | 0.0458503   | 0.7383   | 0.842656    | no  |
| Taf1b   | 30.8667 | 28.4903 | -0.115583   | 0.4324   | 0.590585    | no  |
| Taf1c   | 13.7353 | 15.2063 | 0.146782    | 0.33075  | 0.486395    | no  |
| Taf1d   | 50.2772 | 48.0107 | -0.0665477  | 0.76385  | 0.859819    | no  |
| Taf2    | 15.2935 | 15.0667 | -0.0215478  | 0.87985  | 0.932638    | no  |
| Taf3    | 5.84466 | 5.90936 | 0.0158846   | 0.9212   | 0.957136    | no  |
| Taf4a   | 20.5573 | 20.8167 | 0.0180886   | 0.89735  | 0.943087    | no  |
| Taf4b   | 2.6035  | 3.67839 | 0.498621    | 0.0064   | 0.018565    | yes |
| Taf5    | 4.75157 | 4.70064 | -0.0155478  | 0.96025  | 0.978593    | no  |
| Taf5l   | 29.1594 | 31.9528 | 0.131978    | 0.36055  | 0.518602    | no  |
| Taf6    | 26.2331 | 24.4152 | -0.103608   | 0.5389   | 0.688571    | no  |
| Taf6l   | 2.39281 | 2.75254 | 0.202055    | 0.67195  | 0.795765    | no  |
| Taf7    | 12.1613 | 12.6773 | 0.0599503   | 0.771    | 0.864626    | no  |
| Taf8    | 25.4853 | 24.43   | -0.061015   | 0.6826   | 0.803591    | no  |
| Taf9    | 54.3245 | 53.5386 | -0.0210236  | 0.8951   | 0.941465    | no  |
| Taf9b   | 21.1676 | 18.8798 | -0.165017   | 0.27975  | 0.429358    | no  |
| Tagap   | 38.4946 | 48.5342 | 0.334347    | 0.0196   | 0.0489684   | yes |
| Tagap1  | 6.49418 | 7.818   | 0.267653    | 0.14045  | 0.253698    | no  |
| Tagln   | 4.14678 | 3.7808  | -0.1333     | 0.8458   | 0.911855    | no  |
| Tagln2  | 442.711 | 558.58  | 0.335399    | 0.01955  | 0.0488608   | yes |
| Taldo1  | 186.88  | 185.543 | -0.0103595  | 0.9462   | 0.970877    | no  |
| Tamm41  | 11.3272 | 11.905  | 0.0717694   | 0.71065  | 0.823509    | no  |
| Tanc1   | 5.72904 | 7.58436 | 0.404733    | 0.00745  | 0.0212022   | yes |
| Tango2  | 20.4894 | 18.7886 | -0.125016   | 0.44165  | 0.599518    | no  |

|          |          |         |             |          |             |     |
|----------|----------|---------|-------------|----------|-------------|-----|
| Tango6   | 1.88076  | 1.77924 | -0.0800578  | 0.70905  | 0.822384    | no  |
| Tank     | 25.1264  | 23.6217 | -0.0890924  | 0.5597   | 0.706199    | no  |
| Taok1    | 12.3453  | 12.0699 | -0.0325489  | 0.81455  | 0.892672    | no  |
| Taok2    | 34.6868  | 33.7711 | -0.0385971  | 0.7826   | 0.872423    | no  |
| Taok3    | 41.13    | 39.412  | -0.0615537  | 0.6587   | 0.786034    | no  |
| Tap1     | 133.641  | 122.388 | -0.126894   | 0.3709   | 0.529486    | no  |
| Tap2     | 132.883  | 145.596 | 0.131818    | 0.3525   | 0.510038    | no  |
| Tapbp    | 107.875  | 119.251 | 0.144641    | 0.3049   | 0.457687    | no  |
| Tapbpl   | 66.693   | 72.1363 | 0.113189    | 0.64235  | 0.773441    | no  |
| Tapt1    | 26.6694  | 25.822  | -0.0465816  | 0.7464   | 0.848198    | no  |
| Tarbp2   | 19.0261  | 19.3931 | 0.0275629   | 0.86155  | 0.921781    | no  |
| Tardbp   | 33.2674  | 31.9272 | -0.0593231  | 0.67265  | 0.796233    | no  |
| Tars     | 32.3916  | 29.8986 | -0.115542   | 0.4211   | 0.579547    | no  |
| Tars2    | 19.884   | 23.4474 | 0.237816    | 0.1146   | 0.216021    | no  |
| Tarsl2   | 2.18889  | 2.43802 | 0.155512    | 0.4788   | 0.634689    | no  |
| Tasp1    | 6.41466  | 8.89372 | 0.471416    | 0.0111   | 0.0300337   | yes |
| Tatdn1   | 6.39393  | 5.46703 | -0.225946   | 0.62225  | 0.757575    | no  |
| Tatdn2   | 39.5116  | 43.9774 | 0.154488    | 0.2795   | 0.429058    | no  |
| Tatdn3   | 4.37265  | 4.058   | -0.107737   | 0.6737   | 0.797035    | no  |
| Tax1bp1  | 93.1821  | 86.3925 | -0.109146   | 0.43815  | 0.596154    | no  |
| Tax1bp3  | 24.4162  | 15.5574 | -0.650236   | 5.00E-05 | 0.000236281 | yes |
| Taz      | 27.1782  | 27.152  | -0.00139377 | 0.9934   | 0.995883    | no  |
| Tbc1d1   | 19.7453  | 20.8372 | 0.0776559   | 0.5862   | 0.728359    | no  |
| Tbc1d10a | 29.4283  | 32.6653 | 0.150558    | 0.3188   | 0.473228    | no  |
| Tbc1d10b | 39.3276  | 33.6604 | -0.224488   | 0.11425  | 0.215482    | no  |
| Tbc1d10c | 321.238  | 317.885 | -0.0151379  | 0.9198   | 0.9563      | no  |
| Tbc1d13  | 23.3168  | 24.0309 | 0.0435223   | 0.76065  | 0.857653    | no  |
| Tbc1d14  | 27.6645  | 24.902  | -0.151774   | 0.2945   | 0.446003    | no  |
| Tbc1d15  | 17.3816  | 16.1496 | -0.10607    | 0.4702   | 0.626797    | no  |
| Tbc1d17  | 19.3338  | 19.5934 | 0.0192448   | 0.9351   | 0.964747    | no  |
| Tbc1d2   | 4.3871   | 3.96334 | -0.146548   | 0.4005   | 0.559498    | no  |
| Tbc1d20  | 37.793   | 37.4701 | -0.0123778  | 0.9318   | 0.96275     | no  |
| Tbc1d22a | 20.8444  | 19.2795 | -0.112585   | 0.4482   | 0.605626    | no  |
| Tbc1d22b | 42.2605  | 41.7997 | -0.0158189  | 0.9134   | 0.952565    | no  |
| Tbc1d23  | 7.1159   | 6.84929 | -0.0550914  | 0.7376   | 0.842198    | no  |
| Tbc1d25  | 7.65359  | 6.84427 | -0.16124    | 0.3565   | 0.514265    | no  |
| Tbc1d2b  | 20.783   | 20.5997 | -0.0127807  | 0.92675  | 0.96009     | no  |
| Tbc1d31  | 4.2801   | 3.28528 | -0.381631   | 0.04555  | 0.100535    | no  |
| Tbc1d4   | 0.945001 | 2.4281  | 1.36144     | 5.00E-05 | 0.000236281 | yes |
| Tbc1d5   | 5.4306   | 5.96842 | 0.136237    | 0.39475  | 0.553954    | no  |
| Tbc1d7   | 7.14676  | 5.4865  | -0.381403   | 0.08865  | 0.175058    | no  |
| Tbc1d8b  | 6.08574  | 6.16762 | 0.019281    | 0.9008   | 0.945066    | no  |
| Tbc1d9b  | 21.6462  | 23.759  | 0.13436     | 0.33955  | 0.495967    | no  |
| Tbca     | 239.661  | 223.076 | -0.103465   | 0.47725  | 0.633313    | no  |
| Tbcb     | 52.1587  | 49.9718 | -0.0617934  | 0.6903   | 0.809267    | no  |
| Tbcc     | 12.2807  | 10.7076 | -0.197762   | 0.25745  | 0.402618    | no  |
| Tbccd1   | 6.83168  | 7.69181 | 0.171083    | 0.32295  | 0.477961    | no  |
| Tbcd     | 21.8958  | 19.5707 | -0.161964   | 0.33195  | 0.487621    | no  |
| Tbce     | 23.8822  | 23.023  | -0.0528578  | 0.80935  | 0.889695    | no  |
| Tbcel    | 14.0231  | 19.9163 | 0.506151    | 0.00065  | 0.00244919  | yes |
| Tbck     | 4.27602  | 4.5635  | 0.0938723   | 0.6069   | 0.74525     | no  |
| Tbk1     | 33.435   | 32.0875 | -0.0593464  | 0.67865  | 0.800728    | no  |
| Tbkbp1   | 22.4375  | 11.7648 | -0.931432   | 5.00E-05 | 0.000236281 | yes |
| Tbl1x    | 14.1965  | 15.0112 | 0.0804994   | 0.613    | 0.750208    | no  |
| Tbl1xr1  | 19.1302  | 20.3681 | 0.090463    | 0.5248   | 0.676408    | no  |
| Tbl2     | 14.8686  | 16.0032 | 0.106094    | 0.47165  | 0.628137    | no  |
| Tbl3     | 13.7374  | 13.9692 | 0.0241401   | 0.88075  | 0.933144    | no  |



|         |          |         |            |          |             |     |
|---------|----------|---------|------------|----------|-------------|-----|
| Tbp     | 21.9171  | 20.5193 | -0.0950741 | 0.54045  | 0.689927    | no  |
| Tbpl1   | 19.6791  | 16.7651 | -0.231209  | 0.12295  | 0.228556    | no  |
| Tbrg1   | 79.2503  | 78.0495 | -0.0220256 | 0.8772   | 0.931183    | no  |
| Tbrg4   | 22.5448  | 23.7016 | 0.0721863  | 0.6316   | 0.765078    | no  |
| Tbx21   | 157.406  | 113.878 | -0.467003  | 7.00E-04 | 0.00261609  | yes |
| Tbx6    | 4.03786  | 4.4036  | 0.125091   | 0.5833   | 0.72606     | no  |
| Tbxa2r  | 13.0248  | 13.2391 | 0.0235424  | 0.8883   | 0.937344    | no  |
| Tcaim   | 3.28442  | 4.20635 | 0.35693    | 0.0646   | 0.134613    | no  |
| Tcea1   | 65.8667  | 62.7829 | -0.0691758 | 0.62     | 0.755905    | no  |
| Tcea2   | 6.46421  | 7.80732 | 0.272355   | 0.2271   | 0.370052    | no  |
| Tceanc  | 2.82312  | 2.53723 | -0.154033  | 0.4284   | 0.586609    | no  |
| Tceanc2 | 7.65209  | 4.11707 | -0.894235  | 5.00E-05 | 0.000236281 | yes |
| Tceb1   | 65.9995  | 55.2918 | -0.255389  | 0.09395  | 0.183582    | no  |
| Tceb2   | 329.895  | 306.806 | -0.104681  | 0.83615  | 0.906116    | no  |
| Tceb3   | 32.2365  | 34.7979 | 0.110307   | 0.4406   | 0.598519    | no  |
| Tcerg1  | 21.8131  | 22.3432 | 0.0346458  | 0.8122   | 0.891426    | no  |
| Tcf12   | 23.5738  | 27.8136 | 0.238607   | 0.09955  | 0.192584    | no  |
| Tcf19   | 35.9297  | 20.3502 | -0.820136  | 5.00E-05 | 0.000236281 | yes |
| Tcf20   | 16.1389  | 16.7752 | 0.0557853  | 0.7034   | 0.818264    | no  |
| Tcf25   | 104.832  | 103.793 | -0.0143691 | 0.92045  | 0.956694    | no  |
| Tcf3    | 70.3589  | 71.8274 | 0.0298019  | 0.83445  | 0.905176    | no  |
| Tcf7    | 185.949  | 302.995 | 0.704387   | 5.00E-05 | 0.000236281 | yes |
| Tchp    | 8.63898  | 7.49741 | -0.204468  | 0.2185   | 0.359525    | no  |
| Tcirg1  | 51.6811  | 50.823  | -0.0241562 | 0.86425  | 0.92341     | no  |
| Tcn2    | 11.371   | 6.65757 | -0.772287  | 5.00E-05 | 0.000236281 | yes |
| Tcof1   | 36.4485  | 38.9764 | 0.0967408  | 0.49515  | 0.649833    | no  |
| Tcp1    | 92.4745  | 96.483  | 0.0612191  | 0.68675  | 0.80662     | no  |
| Tcp11   | 2.57916  | 2.7322  | 0.0831618  | 0.7361   | 0.841138    | no  |
| Tcp1112 | 60.3629  | 72.7674 | 0.269631   | 0.057    | 0.121535    | no  |
| Tcta    | 8.50871  | 8.5891  | 0.0135661  | 0.93915  | 0.967073    | no  |
| Tctn1   | 15.3077  | 18.0652 | 0.238949   | 0.2257   | 0.368366    | no  |
| Tctn3   | 3.73789  | 3.75593 | 0.00694594 | 0.9756   | 0.986629    | no  |
| Tdg     | 6.726    | 6.53408 | -0.0417657 | 0.89415  | 0.940886    | no  |
| Tdp1    | 16.3063  | 14.0081 | -0.219166  | 0.1791   | 0.30803     | no  |
| Tdp2    | 15.551   | 13.8536 | -0.166749  | 0.30965  | 0.463104    | no  |
| Tdrd3   | 5.17509  | 5.99956 | 0.213273   | 0.24905  | 0.394445    | no  |
| Tdrp    | 1.45907  | 3.25859 | 1.1592     | 0.00015  | 0.000653255 | yes |
| Tec     | 5.75923  | 7.38943 | 0.359586   | 0.04445  | 0.0984705   | no  |
| Tecpr1  | 70.0596  | 87.4512 | 0.319895   | 0.024    | 0.0584268   | no  |
| Tecpr2  | 1.96239  | 2.29074 | 0.223202   | 0.20485  | 0.342291    | no  |
| Tecr    | 124.026  | 122.218 | -0.0211962 | 0.8828   | 0.934446    | no  |
| Tef     | 8.88946  | 7.50309 | -0.244611  | 0.1207   | 0.225264    | no  |
| Tefm    | 3.76666  | 4.463   | 0.244725   | 0.3324   | 0.488099    | no  |
| Telo2   | 4.52377  | 5.27971 | 0.222934   | 0.2091   | 0.34782     | no  |
| Ten1    | 50.9797  | 48.1025 | -0.0838129 | 0.70655  | 0.820617    | no  |
| Tenc1   | 0.906188 | 1.05274 | 0.216271   | 0.40285  | 0.561836    | no  |
| Tep1    | 8.16823  | 9.42621 | 0.206654   | 0.15565  | 0.275354    | no  |
| Terf1   | 13.7718  | 13.0545 | -0.0771713 | 0.63135  | 0.764867    | no  |
| Terf2   | 23.3628  | 25.1246 | 0.104886   | 0.482    | 0.637578    | no  |
| Terf2ip | 13.7462  | 12.8246 | -0.10012   | 0.51095  | 0.664184    | no  |
| Tes     | 104.978  | 97.3555 | -0.10875   | 0.43945  | 0.597462    | no  |
| Tesc    | 28.8231  | 27.0574 | -0.0912011 | 0.60185  | 0.741357    | no  |
| Tesk1   | 9.2703   | 9.80017 | 0.0801909  | 0.699    | 0.815377    | no  |
| Tesk2   | 1.74082  | 1.69905 | -0.0350391 | 0.9442   | 0.969778    | no  |
| Tespa1  | 33.7021  | 43.98   | 0.38401    | 0.0103   | 0.0281508   | yes |
| Tet1    | 1.03633  | 1.27336 | 0.297161   | 0.0992   | 0.192049    | no  |
| Tet2    | 6.86231  | 7.51848 | 0.131748   | 0.3749   | 0.53361     | no  |

|          |          |         |             |         |             |     |
|----------|----------|---------|-------------|---------|-------------|-----|
| Tet3     | 8.73497  | 10.5062 | 0.26637     | 0.0629  | 0.131837    | no  |
| Tex10    | 23.2213  | 26.5999 | 0.19597     | 0.2381  | 0.382885    | no  |
| Tex2     | 2.97489  | 2.8302  | -0.0719314  | 0.69865 | 0.815076    | no  |
| Tex261   | 46.5909  | 44.9528 | -0.051635   | 0.72925 | 0.836058    | no  |
| Tex264   | 40.235   | 44.712  | 0.152213    | 0.3099  | 0.463389    | no  |
| Tex30    | 16.6337  | 16.1132 | -0.0458659  | 0.7903  | 0.877708    | no  |
| Tex9     | 5.3962   | 4.90713 | -0.137064   | 0.54975 | 0.697811    | no  |
| Tfam     | 16.1899  | 14.1069 | -0.198694   | 0.1823  | 0.312483    | no  |
| Tfap4    | 2.47288  | 2.93879 | 0.249033    | 0.3112  | 0.464801    | no  |
| Tfb1m    | 8.03318  | 8.33169 | 0.0526375   | 0.80515 | 0.887012    | no  |
| Tfb2m    | 13.2569  | 14.705  | 0.149561    | 0.349   | 0.506302    | no  |
| Tfcp2    | 1.76793  | 2.29769 | 0.378124    | 0.097   | 0.188592    | no  |
| Tfdp1    | 40.4585  | 34.8729 | -0.214335   | 0.1425  | 0.256492    | no  |
| Tfdp2    | 1.12849  | 1.0744  | -0.0708674  | 0.73955 | 0.843401    | no  |
| Tfe3     | 10.488   | 10.2131 | -0.0383245  | 0.81455 | 0.892672    | no  |
| Tfeb     | 12.0735  | 9.87072 | -0.290614   | 0.07755 | 0.156542    | no  |
| Tfg      | 28.2531  | 26.1699 | -0.110499   | 0.4668  | 0.623667    | no  |
| Tfip11   | 22.5329  | 21.3844 | -0.0754733  | 0.636   | 0.768391    | no  |
| Tfpi     | 1.50094  | 1.26009 | -0.252339   | 0.4492  | 0.606582    | no  |
| Tfpt     | 17.2702  | 18.0872 | 0.0666865   | 0.70455 | 0.819184    | no  |
| Tfrc     | 7.8715   | 8.30786 | 0.0778381   | 0.61345 | 0.750603    | no  |
| Tgds     | 16.9278  | 17.5369 | 0.0510003   | 0.7498  | 0.850432    | no  |
| Tgfb1    | 56.1165  | 56.555  | 0.0112286   | 0.9386  | 0.966747    | no  |
| Tgibr1   | 5.15041  | 5.73811 | 0.155889    | 0.3369  | 0.493107    | no  |
| Tgibr2   | 63.1354  | 66.8074 | 0.0815599   | 0.5685  | 0.713387    | no  |
| Tgibrap1 | 15.035   | 14.7406 | -0.0285248  | 0.8443  | 0.91124     | no  |
| Tgif1    | 12.12    | 14.8586 | 0.293902    | 0.0992  | 0.192049    | no  |
| Tgif2    | 1.11663  | 1.21531 | 0.122171    | 0.72505 | 0.83326     | no  |
| Tgm4     | 1.41121  | 1.64907 | 0.224711    | 0.3978  | 0.556884    | no  |
| Tgoln1   | 50.4535  | 46.4605 | -0.118948   | 0.4435  | 0.601243    | no  |
| Tgoln2   | 19.7577  | 23.4639 | 0.248029    | 0.50705 | 0.660782    | no  |
| Tgs1     | 10.0343  | 9.58623 | -0.0659033  | 0.6698  | 0.794258    | no  |
| Tgtp1    | 0.729657 | 1.04409 | 0.516951    | 0.2916  | 0.442608    | no  |
| Tha1     | 3.96569  | 7.13997 | 0.848348    | 0.00015 | 0.000653255 | yes |
| Thada    | 8.35252  | 10.1156 | 0.276297    | 0.0585  | 0.124212    | no  |
| Thap1    | 7.01642  | 7.2285  | 0.0429612   | 0.8181  | 0.895034    | no  |
| Thap11   | 23.4094  | 23.2955 | -0.00703986 | 0.9617  | 0.979491    | no  |
| Thap2    | 4.64847  | 4.72868 | 0.0246829   | 0.88845 | 0.93746     | no  |
| Thap3    | 102.454  | 100.837 | -0.0229515  | 0.87715 | 0.931161    | no  |
| Thap4    | 13.3699  | 11.3557 | -0.235567   | 0.1577  | 0.278332    | no  |
| Thap7    | 18.5905  | 18.7108 | 0.00930832  | 0.95585 | 0.976393    | no  |
| Them4    | 1.71172  | 2.58474 | 0.594568    | 0.0375  | 0.0852193   | no  |
| Them6    | 19.1689  | 19.8215 | 0.0482954   | 0.7719  | 0.865251    | no  |
| Themis   | 58.5744  | 67.1367 | 0.19683     | 0.16475 | 0.288367    | no  |
| Themis2  | 15.2192  | 14.4749 | -0.0723435  | 0.64085 | 0.772175    | no  |
| Thgl1    | 2.67107  | 3.27017 | 0.291948    | 0.13775 | 0.250056    | no  |
| Thns11   | 1.13276  | 1.29415 | 0.192168    | 0.4388  | 0.596855    | no  |
| Thoc1    | 14.2257  | 15.0632 | 0.0825286   | 0.68865 | 0.808044    | no  |
| Thoc2    | 20.5482  | 20.3307 | -0.015351   | 0.91345 | 0.952575    | no  |
| Thoc3    | 16.0243  | 16.3671 | 0.0305404   | 0.84345 | 0.910643    | no  |
| Thoc5    | 26.8975  | 27.9305 | 0.0543701   | 0.70725 | 0.821092    | no  |
| Thoc6    | 16.7959  | 14.2555 | -0.236587   | 0.34515 | 0.502038    | no  |
| Thoc7    | 68.2182  | 65.6159 | -0.0561103  | 0.69965 | 0.815717    | no  |
| Thop1    | 3.41921  | 3.82765 | 0.162796    | 0.42955 | 0.587841    | no  |
| Thra     | 1.73658  | 2.68425 | 0.628264    | 0.01535 | 0.0396209   | yes |
| Thrap3   | 76.8175  | 82.4874 | 0.102738    | 0.46715 | 0.623957    | no  |
| Thtpa    | 15.1953  | 16.0726 | 0.0809785   | 0.78095 | 0.871189    | no  |

|          |          |          |            |          |             |     |
|----------|----------|----------|------------|----------|-------------|-----|
| Thumpd1  | 25.0105  | 28.0456  | 0.165243   | 0.2559   | 0.400833    | no  |
| Thumpd2  | 5.71076  | 6.59642  | 0.208002   | 0.29545  | 0.447       | no  |
| Thumpd3  | 27.1319  | 27.9897  | 0.0449054  | 0.78145  | 0.871582    | no  |
| Thy1     | 1053.21  | 1018.03  | -0.0490118 | 0.74525  | 0.847396    | no  |
| Thyn1    | 22.3185  | 23.3695  | 0.066383   | 0.88365  | 0.934939    | no  |
| Tia1     | 18.248   | 17.9503  | -0.0237354 | 0.86955  | 0.926633    | no  |
| Tial1    | 21.3328  | 21.0768  | -0.0174193 | 0.90595  | 0.948214    | no  |
| Ticam1   | 9.88211  | 8.96118  | -0.141129  | 0.3907   | 0.549714    | no  |
| Ticrr    | 3.688    | 2.50211  | -0.559692  | 0.0047   | 0.0141816   | yes |
| Tigd2    | 12.2387  | 13.07    | 0.0948072  | 0.5458   | 0.694295    | no  |
| Tigd3    | 1.254    | 0.794359 | -0.658675  | 0.05735  | 0.122174    | no  |
| Tigit    | 65.2647  | 90.1782  | 0.466476   | 0.0021   | 0.00696828  | yes |
| Timeless | 8.14026  | 5.47236  | -0.572912  | 0.00065  | 0.00244919  | yes |
| Timm10   | 11.2709  | 11.0735  | -0.0254917 | 0.9122   | 0.95189     | no  |
| Timm10b  | 28.0184  | 25.362   | -0.143707  | 0.3924   | 0.551512    | no  |
| Timm13   | 44.6018  | 45.5638  | 0.0307861  | 0.84115  | 0.909133    | no  |
| Timm17a  | 41.7954  | 46.6386  | 0.158181   | 0.3213   | 0.476208    | no  |
| Timm17b  | 18.0987  | 16.5584  | -0.12832   | 0.4365   | 0.594517    | no  |
| Timm21   | 15.0966  | 15.3181  | 0.021013   | 0.90735  | 0.94899     | no  |
| Timm22   | 8.35508  | 8.67654  | 0.0544657  | 0.7389   | 0.843136    | no  |
| Timm23   | 81.2757  | 84.4688  | 0.0555943  | 0.7002   | 0.816048    | no  |
| Timm44   | 32.7647  | 32.2566  | -0.0225475 | 0.88015  | 0.932844    | no  |
| Timm50   | 24.3663  | 24.7462  | 0.0223171  | 0.8973   | 0.943062    | no  |
| Timm8a1  | 13.3978  | 15.9574  | 0.252237   | 0.16645  | 0.290787    | no  |
| Timm8b   | 46.3487  | 52.6084  | 0.182764   | 0.55295  | 0.700512    | no  |
| Timm9    | 12.0804  | 12.8006  | 0.083545   | 0.6924   | 0.810692    | no  |
| Timmdc1  | 11.4143  | 11.9484  | 0.0659704  | 0.69865  | 0.815076    | no  |
| Timp2    | 4.04387  | 2.85965  | -0.499895  | 0.0089   | 0.0247598   | yes |
| Tinf2    | 20.3877  | 18.7638  | -0.119746  | 0.4487   | 0.606092    | no  |
| Tiparp   | 8.04428  | 8.53712  | 0.0857858  | 0.59385  | 0.734799    | no  |
| Tipin    | 34.8477  | 22.2814  | -0.645222  | 5.00E-05 | 0.000236281 | yes |
| Tiprl    | 16.0783  | 13.966   | -0.203193  | 0.16965  | 0.294976    | no  |
| Tjap1    | 16.3924  | 16.1348  | -0.0228568 | 0.88445  | 0.935379    | no  |
| Tjp2     | 2.45576  | 3.0458   | 0.310651   | 0.1024   | 0.197061    | no  |
| Tjp3     | 5.64024  | 5.51607  | -0.0321141 | 0.8952   | 0.941528    | no  |
| Tk1      | 25.5261  | 13.2071  | -0.950662  | 0.0011   | 0.00391273  | yes |
| Tk2      | 25.3842  | 26.3871  | 0.0559017  | 0.70925  | 0.822508    | no  |
| Tkt      | 74.6047  | 73.5511  | -0.0205187 | 0.88525  | 0.93586     | no  |
| Tktl1    | 0.70278  | 1.30376  | 0.891533   | 0.0093   | 0.0257386   | yes |
| Tldc1    | 3.46082  | 3.99235  | 0.206123   | 0.31135  | 0.464976    | no  |
| Tle1     | 4.35759  | 5.42926  | 0.317227   | 0.16875  | 0.293707    | no  |
| Tle3     | 66.5288  | 81.5572  | 0.293833   | 0.038    | 0.0861807   | no  |
| Tle4     | 23.5742  | 23.9459  | 0.0225682  | 0.8748   | 0.929645    | no  |
| Tlk1     | 46.8838  | 45.7644  | -0.0348648 | 0.79615  | 0.881293    | no  |
| Tlk2     | 12.5314  | 13.0315  | 0.0564543  | 0.691    | 0.809711    | no  |
| Tln1     | 188.185  | 185.016  | -0.0245001 | 0.87825  | 0.931866    | no  |
| Tlr1     | 10.3999  | 15.069   | 0.535007   | 6.00E-04 | 0.00228064  | yes |
| Tlr12    | 2.03787  | 1.58299  | -0.364405  | 0.13135  | 0.241079    | no  |
| Tlr2     | 0.850795 | 1.05495  | 0.310292   | 0.3144   | 0.468243    | no  |
| Tlr6     | 1.4972   | 1.51143  | 0.0136441  | 0.94945  | 0.972783    | no  |
| Tm2d1    | 21.1731  | 21.8984  | 0.0485927  | 0.78475  | 0.874033    | no  |
| Tm2d2    | 16.1981  | 16.6453  | 0.0392879  | 0.826    | 0.900147    | no  |
| Tm2d3    | 18.5195  | 19.0434  | 0.0402418  | 0.8272   | 0.900787    | no  |
| Tm6sf1   | 52.2456  | 33.6322  | -0.635466  | 0.003    | 0.00955705  | yes |
| Tm7sf2   | 2.13608  | 2.64983  | 0.310937   | 0.62785  | 0.761896    | no  |
| Tm7sf3   | 13.401   | 13.4593  | 0.0062596  | 0.97155  | 0.984324    | no  |
| Tm9sf1   | 31.2675  | 30.3555  | -0.0427055 | 0.7659   | 0.861124    | no  |

|          |          |         |            |         |             |     |
|----------|----------|---------|------------|---------|-------------|-----|
| Tm9sf2   | 43.1737  | 42.8252 | -0.0116928 | 0.93695 | 0.96578     | no  |
| Tm9sf3   | 48.3651  | 49.5923 | 0.0361518  | 0.79675 | 0.88168     | no  |
| Tm9sf4   | 16.698   | 16.8272 | 0.0111166  | 0.93895 | 0.966952    | no  |
| Tma16    | 5.97368  | 6.68226 | 0.161716   | 0.4972  | 0.651651    | no  |
| Tma7     | 350.876  | 331.292 | -0.0828545 | 0.5536  | 0.701084    | no  |
| Tmbim1   | 3.68966  | 2.91635 | -0.339323  | 0.2696  | 0.417365    | no  |
| Tmbim4   | 30.4314  | 33.949  | 0.157808   | 0.3603  | 0.518359    | no  |
| Tmbim6   | 252.982  | 232.201 | -0.123656  | 0.3894  | 0.548541    | no  |
| Tmc6     | 89.3639  | 90.984  | 0.0259205  | 0.8623  | 0.922218    | no  |
| Tmc8     | 63.4692  | 58.5328 | -0.116812  | 0.4122  | 0.571062    | no  |
| Tmcc1    | 2.78667  | 3.08155 | 0.145115   | 0.41755 | 0.576156    | no  |
| Tmco1    | 13.3381  | 13.3837 | 0.00492592 | 0.975   | 0.986277    | no  |
| Tmco3    | 3.6504   | 3.24261 | -0.170899  | 0.5174  | 0.669941    | no  |
| Tmco4    | 15.8733  | 13.1273 | -0.274032  | 0.07275 | 0.148354    | no  |
| Tmco6    | 19.0166  | 18.5249 | -0.0377881 | 0.88395 | 0.935074    | no  |
| Tmed1    | 7.55985  | 8.60578 | 0.186948   | 0.8431  | 0.910391    | no  |
| Tmed10   | 43.5565  | 43.6803 | 0.00409426 | 0.97795 | 0.987661    | no  |
| Tmed2    | 168.579  | 164.254 | -0.0375014 | 0.79015 | 0.87761     | no  |
| Tmed3    | 33.0176  | 31.3387 | -0.0752888 | 0.6308  | 0.764385    | no  |
| Tmed4    | 19.9928  | 21.3563 | 0.095183   | 0.55415 | 0.701554    | no  |
| Tmed5    | 32.4878  | 33.192  | 0.0309397  | 0.82635 | 0.90032     | no  |
| Tmed7    | 34.9001  | 32.476  | -0.103855  | 0.4681  | 0.624777    | no  |
| Tmed8    | 7.58156  | 7.40599 | -0.0338012 | 0.82425 | 0.898947    | no  |
| Tmed9    | 170.09   | 174.952 | 0.0406615  | 0.7705  | 0.864285    | no  |
| Tmem101  | 8.38572  | 8.4306  | 0.00770055 | 0.96525 | 0.98104     | no  |
| Tmem104  | 8.25685  | 7.53938 | -0.131146  | 0.40195 | 0.560947    | no  |
| Tmem106a | 1.34302  | 1.00225 | -0.422239  | 0.1714  | 0.297491    | no  |
| Tmem106b | 17.4261  | 18.2396 | 0.0658252  | 0.6491  | 0.778607    | no  |
| Tmem106c | 3.9242   | 3.55838 | -0.141181  | 0.55905 | 0.705744    | no  |
| Tmem107  | 3.11065  | 2.38501 | -0.383219  | 0.2275  | 0.370464    | no  |
| Tmem109  | 36.1362  | 36.24   | 0.00414025 | 0.977   | 0.987224    | no  |
| Tmem11   | 15.9613  | 15.0829 | -0.0816644 | 0.64565 | 0.775932    | no  |
| Tmem110  | 6.16296  | 6.2098  | 0.0109229  | 0.9473  | 0.971568    | no  |
| Tmem115  | 15.644   | 14.9177 | -0.0685905 | 0.6713  | 0.795315    | no  |
| Tmem120a | 30.0342  | 25.9449 | -0.211155  | 0.1836  | 0.314299    | no  |
| Tmem120b | 2.35564  | 2.45996 | 0.0625197  | 0.8113  | 0.890853    | no  |
| Tmem123  | 88.6801  | 95.2717 | 0.103438   | 0.4681  | 0.624777    | no  |
| Tmem126a | 57.5313  | 58.4266 | 0.0222779  | 0.8858  | 0.936091    | no  |
| Tmem126b | 17.9835  | 18.9479 | 0.0753623  | 0.69275 | 0.810995    | no  |
| Tmem127  | 36.6786  | 37.0487 | 0.0144832  | 0.91825 | 0.955266    | no  |
| Tmem128  | 52.1505  | 50.3134 | -0.0517383 | 0.7336  | 0.839178    | no  |
| Tmem129  | 10.913   | 10.4892 | -0.0571478 | 0.7352  | 0.840477    | no  |
| Tmem131  | 15.5272  | 16.2253 | 0.0634522  | 0.65425 | 0.782736    | no  |
| Tmem134  | 61.7596  | 62.7967 | 0.0240254  | 0.8717  | 0.927887    | no  |
| Tmem135  | 9.02386  | 7.9727  | -0.178676  | 0.264   | 0.41065     | no  |
| Tmem138  | 10.43    | 9.25684 | -0.172142  | 0.43395 | 0.592232    | no  |
| Tmem141  | 0.678149 | 2.8028  | 2.04719    | 0.0016  | 0.00547227  | yes |
| Tmem143  | 4.81064  | 4.74728 | -0.0191276 | 0.92475 | 0.958862    | no  |
| Tmem147  | 40.0965  | 41.4525 | 0.0479844  | 0.7683  | 0.862723    | no  |
| Tmem14a  | 2.19394  | 1.94298 | -0.175253  | 0.59165 | 0.732925    | no  |
| Tmem14c  | 133.493  | 125.094 | -0.0937599 | 0.50665 | 0.660468    | no  |
| Tmem151a | 2.01029  | 1.00494 | -1.00029   | 0.00015 | 0.000653255 | yes |
| Tmem154  | 20.0615  | 23.8579 | 0.250034   | 0.0872  | 0.172624    | no  |
| Tmem159  | 2.22171  | 3.03792 | 0.45141    | 0.11195 | 0.211932    | no  |
| Tmem160  | 65.579   | 60.467  | -0.117085  | 0.4487  | 0.606092    | no  |
| Tmem161a | 15.2848  | 15.6683 | 0.0357508  | 0.81685 | 0.894263    | no  |
| Tmem161b | 12.1289  | 12.0338 | -0.0113613 | 0.944   | 0.969705    | no  |

|          |         |         |             |          |            |     |
|----------|---------|---------|-------------|----------|------------|-----|
| Tmem163  | 15.0267 | 9.69562 | -0.632125   | 2.00E-04 | 0.0008488  | yes |
| Tmem164  | 12.7434 | 11.9566 | -0.0919329  | 0.5604   | 0.706741   | no  |
| Tmem165  | 40.0087 | 34.5701 | -0.210789   | 0.15705  | 0.277351   | no  |
| Tmem167  | 9.57143 | 9.0775  | -0.0764389  | 0.59265  | 0.733777   | no  |
| Tmem167b | 23.887  | 22.6873 | -0.0743384  | 0.6107   | 0.748259   | no  |
| Tmem168  | 7.22172 | 7.12173 | -0.0201133  | 0.8967   | 0.942642   | no  |
| Tmem170  | 1.68668 | 1.7151  | 0.0241056   | 0.9401   | 0.967614   | no  |
| Tmem170b | 1.63916 | 1.68667 | 0.0412238   | 0.82795  | 0.901131   | no  |
| Tmem171  | 1.63625 | 1.46621 | -0.158301   | 0.68035  | 0.802039   | no  |
| Tmem173  | 47.795  | 52.0021 | 0.121711    | 0.39925  | 0.55826    | no  |
| Tmem175  | 10.9328 | 9.74211 | -0.166362   | 0.53745  | 0.68749    | no  |
| Tmem176a | 2.88951 | 4.368   | 0.596145    | 0.03995  | 0.0899413  | no  |
| Tmem176b | 2.98812 | 4.55182 | 0.607208    | 0.02775  | 0.0660836  | no  |
| Tmem177  | 1.66601 | 1.7315  | 0.055619    | 0.8201   | 0.896347   | no  |
| Tmem179b | 82.7325 | 82.503  | -0.00400779 | 0.98305  | 0.990219   | no  |
| Tmem18   | 11.3796 | 10.5213 | -0.113141   | 0.478    | 0.634057   | no  |
| Tmem180  | 1.99518 | 2.86817 | 0.523608    | 0.0338   | 0.0780192  | no  |
| Tmem181a | 5.78357 | 5.79699 | 0.00334362  | 0.9861   | 0.99189    | no  |
| Tmem183a | 21.2991 | 20.5906 | -0.0488119  | 0.741    | 0.844386   | no  |
| Tmem184b | 13.9828 | 14.424  | 0.0448162   | 0.7703   | 0.86413    | no  |
| Tmem184c | 21.7477 | 21.5842 | -0.0108815  | 0.94225  | 0.968641   | no  |
| Tmem185b | 9.2967  | 10.4704 | 0.171525    | 0.29085  | 0.44185    | no  |
| Tmem186  | 7.46739 | 8.94102 | 0.259835    | 0.1265   | 0.233887   | no  |
| Tmem189  | 50.6978 | 49.1586 | -0.0444798  | 0.758    | 0.855758   | no  |
| Tmem19   | 14.3987 | 13.2539 | -0.119524   | 0.43225  | 0.590414   | no  |
| Tmem191c | 4.83922 | 8.18669 | 0.758505    | 0.00085  | 0.00311418 | yes |
| Tmem192  | 38.5314 | 37.5897 | -0.0356957  | 0.8183   | 0.895142   | no  |
| Tmem194  | 3.6819  | 3.16691 | -0.217373   | 0.28465  | 0.43494    | no  |
| Tmem194b | 18.529  | 16.2488 | -0.189451   | 0.1997   | 0.335752   | no  |
| Tmem198  | 4.11777 | 4.9824  | 0.274978    | 0.18235  | 0.312546   | no  |
| Tmem198b | 3.05663 | 3.14293 | 0.0401673   | 0.85225  | 0.915997   | no  |
| Tmem199  | 13.3639 | 12.9496 | -0.0454323  | 0.80415  | 0.886506   | no  |
| Tmem2    | 2.30843 | 3.07696 | 0.414592    | 0.0182   | 0.0459177  | yes |
| Tmem201  | 5.76474 | 6.00346 | 0.0585377   | 0.7266   | 0.834416   | no  |
| Tmem203  | 14.2002 | 12.3618 | -0.200023   | 0.31785  | 0.472176   | no  |
| Tmem206  | 1.9634  | 2.04065 | 0.0556737   | 0.96825  | 0.982744   | no  |
| Tmem208  | 58.5145 | 55.5495 | -0.0750196  | 0.6314   | 0.764915   | no  |
| Tmem209  | 19.0249 | 17.7376 | -0.10108    | 0.4977   | 0.652089   | no  |
| Tmem214  | 19.2166 | 19.913  | 0.0513643   | 0.73805  | 0.842521   | no  |
| Tmem216  | 2.47935 | 3.25416 | 0.392323    | 0.2105   | 0.34972    | no  |
| Tmem218  | 1.84877 | 1.46687 | -0.333827   | 0.39515  | 0.554317   | no  |
| Tmem219  | 30.5021 | 31.0401 | 0.025226    | 0.88635  | 0.936364   | no  |
| Tmem221  | 4.74554 | 6.09032 | 0.359944    | 0.10435  | 0.200115   | no  |
| Tmem222  | 35.1374 | 35.7606 | 0.025362    | 0.86385  | 0.923165   | no  |
| Tmem223  | 28.6066 | 34.575  | 0.27338     | 0.12315  | 0.228808   | no  |
| Tmem229b | 21.9478 | 23.1116 | 0.074542    | 0.60065  | 0.740306   | no  |
| Tmem230  | 24.4722 | 23.1417 | -0.0806505  | 0.60605  | 0.744556   | no  |
| Tmem231  | 1.41601 | 1.08994 | -0.377588   | 0.17495  | 0.302233   | no  |
| Tmem234  | 141.312 | 129.459 | -0.126391   | 0.38505  | 0.544074   | no  |
| Tmem237  | 4.78762 | 3.66037 | -0.387321   | 0.07685  | 0.155337   | no  |
| Tmem238  | 6.19287 | 7.42043 | 0.260894    | 0.26015  | 0.405896   | no  |
| Tmem241  | 4.00405 | 3.98576 | -0.00660516 | 0.9718   | 0.98445    | no  |
| Tmem242  | 34.8788 | 34.524  | -0.0147508  | 0.9312   | 0.962482   | no  |
| Tmem243  | 15.8126 | 17.2336 | 0.124147    | 0.8012   | 0.884414   | no  |
| Tmem245  | 4.65467 | 5.22449 | 0.166613    | 0.2822   | 0.432085   | no  |
| Tmem248  | 19.5836 | 17.8921 | -0.130324   | 0.3763   | 0.535096   | no  |
| Tmem251  | 26.1859 | 27.5199 | 0.0716835   | 0.7367   | 0.841578   | no  |

|          |         |          |             |         |            |     |
|----------|---------|----------|-------------|---------|------------|-----|
| Tmem255a | 1.75576 | 1.75273  | -0.00249501 | 0.9965  | 0.997475   | no  |
| Tmem256  | 60.7772 | 56.1272  | -0.11483    | 0.53555 | 0.685904   | no  |
| Tmem258  | 242.63  | 218.329  | -0.152254   | 0.3146  | 0.468422   | no  |
| Tmem259  | 61.3195 | 64.2488  | 0.0673238   | 0.6385  | 0.770501   | no  |
| Tmem260  | 7.89671 | 8.07768  | 0.0326895   | 0.8297  | 0.902201   | no  |
| Tmem261  | 69.4218 | 75.7884  | 0.126589    | 0.42135 | 0.579744   | no  |
| Tmem29   | 5.40065 | 3.79769  | -0.508013   | 0.0367  | 0.0836436  | no  |
| Tmem30a  | 61.6794 | 55.9789  | -0.139905   | 0.32295 | 0.477961   | no  |
| Tmem33   | 9.73507 | 8.74894  | -0.154084   | 0.29945 | 0.451629   | no  |
| Tmem37   | 9.37647 | 6.7829   | -0.467142   | 0.0393  | 0.0886901  | no  |
| Tmem38b  | 2.55317 | 2.22457  | -0.198767   | 0.3884  | 0.54758    | no  |
| Tmem39a  | 9.42626 | 9.52099  | 0.014426    | 0.93085 | 0.962205   | no  |
| Tmem39b  | 7.11387 | 7.19314  | 0.0159876   | 0.93375 | 0.96396    | no  |
| Tmem41a  | 4.37714 | 4.27294  | -0.0347603  | 0.88715 | 0.936789   | no  |
| Tmem41b  | 6.13437 | 5.27055  | -0.218962   | 0.2063  | 0.344193   | no  |
| Tmem42   | 9.42536 | 12.9898  | 0.462758    | 0.0247  | 0.0599119  | no  |
| Tmem43   | 28.6388 | 26.9772  | -0.086231   | 0.54835 | 0.696647   | no  |
| Tmem5    | 6.74937 | 6.92823  | 0.0377356   | 0.86205 | 0.922037   | no  |
| Tmem50a  | 291.241 | 288.017  | -0.0160576  | 0.9093  | 0.949974   | no  |
| Tmem50b  | 15.4724 | 15.4318  | -0.00378775 | 0.98135 | 0.989348   | no  |
| Tmem51   | 1.45771 | 1.23604  | -0.237969   | 0.46515 | 0.622145   | no  |
| Tmem55a  | 9.17061 | 9.26817  | 0.0152675   | 0.9317  | 0.962703   | no  |
| Tmem55b  | 12.9166 | 13.3669  | 0.0494363   | 0.7637  | 0.859801   | no  |
| Tmem57   | 8.05595 | 7.15754  | -0.17059    | 0.29045 | 0.441384   | no  |
| Tmem59   | 76.4118 | 74.1366  | -0.0436105  | 0.768   | 0.862537   | no  |
| Tmem60   | 17.5232 | 16.799   | -0.0608912  | 0.74785 | 0.849094   | no  |
| Tmem62   | 11.1095 | 12.2802  | 0.144534    | 0.36195 | 0.520139   | no  |
| Tmem63a  | 21.3647 | 25.8158  | 0.273022    | 0.0638  | 0.133252   | no  |
| Tmem63b  | 3.79081 | 3.62931  | -0.0628097  | 0.74515 | 0.847323   | no  |
| Tmem64   | 3.1879  | 3.88111  | 0.283864    | 0.1121  | 0.212113   | no  |
| Tmem65   | 5.63249 | 5.83969  | 0.0521196   | 0.7582  | 0.855916   | no  |
| Tmem66   | 347.994 | 369.883  | 0.0880091   | 0.5383  | 0.688066   | no  |
| Tmem68   | 9.45321 | 9.0236   | -0.0671025  | 0.6887  | 0.808063   | no  |
| Tmem69   | 7.52946 | 7.55563  | 0.00500581  | 0.97675 | 0.987057   | no  |
| Tmem70   | 19.2617 | 18.9654  | -0.0223681  | 0.8866  | 0.936446   | no  |
| Tmem71   | 101.314 | 89.9414  | -0.171779   | 0.2226  | 0.364393   | no  |
| Tmem79   | 1.09778 | 1.27635  | 0.217432    | 0.46915 | 0.625787   | no  |
| Tmem8    | 8.0341  | 9.32406  | 0.214822    | 0.1838  | 0.314527   | no  |
| Tmem80   | 12.3325 | 9.54431  | -0.369748   | 0.35345 | 0.511056   | no  |
| Tmem81   | 7.42249 | 7.50448  | 0.0158478   | 0.93535 | 0.964864   | no  |
| Tmem86b  | 8.23283 | 8.78726  | 0.0940259   | 0.6535  | 0.782157   | no  |
| Tmem87a  | 28.6216 | 28.1932  | -0.0217593  | 0.9043  | 0.947189   | no  |
| Tmem87b  | 8.22785 | 8.57698  | 0.0599532   | 0.70035 | 0.816102   | no  |
| Tmem88   | 1.99788 | 1.44017  | -0.472232   | 0.38085 | 0.539826   | no  |
| Tmem9    | 4.72529 | 4.95008  | 0.0670513   | 0.7694  | 0.863463   | no  |
| Tmem97   | 11.3446 | 9.81164  | -0.209435   | 0.2657  | 0.412658   | no  |
| Tmem9b   | 57.6299 | 55.5996  | -0.0517433  | 0.71705 | 0.827677   | no  |
| Tmf1     | 14.5184 | 13.7888  | -0.0743917  | 0.60515 | 0.743864   | no  |
| Tmod3    | 69.3581 | 69.1368  | -0.00461062 | 0.9741  | 0.985861   | no  |
| Tmod4    | 1.18823 | 0.965815 | -0.298995   | 0.4729  | 0.629422   | no  |
| Tmpo     | 93.3497 | 69.0747  | -0.434488   | 0.00235 | 0.00770045 | yes |
| Tmppe    | 3.83464 | 3.64921  | -0.0715062  | 0.7644  | 0.860191   | no  |
| Tmprss13 | 3.08636 | 4.37175  | 0.502302    | 0.00975 | 0.0268451  | yes |
| Tmsb10   | 2903.21 | 2706.51  | -0.101216   | 0.50205 | 0.656192   | no  |
| Tmsb15b1 | 14.2851 | 16.4527  | 0.203807    | 0.5652  | 0.710775   | no  |
| Tmsb15l  | 11.0179 | 8.74932  | -0.332604   | 0.20435 | 0.341658   | no  |
| Tmsb4x   | 13953.3 | 12015.5  | -0.215705   | 0.4643  | 0.621361   | no  |

|           |          |          |             |          |             |     |
|-----------|----------|----------|-------------|----------|-------------|-----|
| Tmtc4     | 3.5497   | 2.95561  | -0.264238   | 0.18365  | 0.314369    | no  |
| Tmub1     | 20.6383  | 20.8936  | 0.0177333   | 0.91515  | 0.953502    | no  |
| Tmub2     | 26.7339  | 25.0314  | -0.0949338  | 0.74355  | 0.84624     | no  |
| Tmx1      | 37.2999  | 34.5906  | -0.108792   | 0.4577   | 0.615153    | no  |
| Tmx2      | 19.5447  | 20.282   | 0.053419    | 0.8508   | 0.91494     | no  |
| Tmx3      | 29.3813  | 26.7965  | -0.132853   | 0.34705  | 0.504147    | no  |
| Tmx4      | 6.49956  | 6.27992  | -0.0495976  | 0.7562   | 0.854533    | no  |
| Tnf       | 13.7415  | 18.4671  | 0.426415    | 0.01115  | 0.0301552   | yes |
| Tnfaip1   | 5.74486  | 5.57261  | -0.0439185  | 0.79895  | 0.88309     | no  |
| Tnfaip3   | 231.525  | 254.774  | 0.13805     | 0.35905  | 0.516972    | no  |
| Tnfaip8   | 24.4584  | 24.7847  | 0.0191216   | 0.8939   | 0.940693    | no  |
| Tnfaip8l1 | 12.2754  | 10.8905  | -0.172691   | 0.2911   | 0.442049    | no  |
| Tnfaip8l2 | 85.7773  | 81.6377  | -0.0713616  | 0.65405  | 0.782602    | no  |
| Tnfrsf10b | 1.07251  | 1.62197  | 0.596751    | 0.0267   | 0.0639998   | no  |
| Tnfrsf12a | 1.91956  | 1.78573  | -0.104262   | 0.9251   | 0.95907     | no  |
| Tnfrsf13b | 7.58797  | 6.12929  | -0.307994   | 0.2487   | 0.39405     | no  |
| Tnfrsf13c | 9.07497  | 7.9024   | -0.199603   | 0.27325  | 0.421665    | no  |
| Tnfrsf14  | 17.0866  | 17.7452  | 0.0545647   | 0.7728   | 0.865765    | no  |
| Tnfrsf18  | 35.6659  | 44.8211  | 0.329632    | 0.0383   | 0.0867579   | no  |
| Tnfrsf1a  | 21.0495  | 16.6368  | -0.339406   | 0.03125  | 0.0730529   | no  |
| Tnfrsf1b  | 37.9322  | 40.8805  | 0.107989    | 0.4442   | 0.601972    | no  |
| Tnfrsf21  | 0.811365 | 1.18989  | 0.552406    | 0.05075  | 0.110149    | no  |
| Tnfrsf22  | 2.86061  | 4.61431  | 0.689792    | 0.0018   | 0.00607738  | yes |
| Tnfrsf23  | 1.24533  | 1.71158  | 0.458805    | 0.0712   | 0.145842    | no  |
| Tnfrsf25  | 14.2111  | 18.5351  | 0.383241    | 0.02135  | 0.0528116   | no  |
| Tnfrsf26  | 12.2744  | 16.2133  | 0.401528    | 0.00905  | 0.0251275   | yes |
| Tnfrsf4   | 2.8107   | 2.60499  | -0.109652   | 0.71815  | 0.828527    | no  |
| Tnfrsf9   | 4.20617  | 3.21292  | -0.388622   | 0.0743   | 0.150979    | no  |
| Tnfsf10   | 10.6214  | 11.9127  | 0.165531    | 0.27435  | 0.422992    | no  |
| Tnfsf14   | 22.3977  | 26.6016  | 0.248157    | 0.1077   | 0.205468    | no  |
| Tnfsf8    | 2.53946  | 5.47327  | 1.10788     | 5.00E-05 | 0.000236281 | yes |
| Tnfsf9    | 3.42421  | 4.23855  | 0.307802    | 0.40145  | 0.560448    | no  |
| Tnik      | 12.376   | 13.1383  | 0.0862381   | 0.5637   | 0.709508    | no  |
| Tnip1     | 55.0159  | 54.679   | -0.00886212 | 0.95155  | 0.974058    | no  |
| Tnip2     | 7.0457   | 5.9307   | -0.248541   | 0.19095  | 0.32413     | no  |
| Tnk2      | 35.4061  | 32.8053  | -0.110069   | 0.44495  | 0.602665    | no  |
| Tnks      | 7.39106  | 7.93553  | 0.102545    | 0.5048   | 0.658859    | no  |
| Tnks1bp1  | 5.63236  | 5.25622  | -0.0997143  | 0.53015  | 0.681102    | no  |
| Tnks2     | 52.4656  | 54.5728  | 0.0568108   | 0.6953   | 0.812713    | no  |
| Tnnt1     | 1.84829  | 0.962253 | -0.941702   | 0.03285  | 0.0761651   | no  |
| Tnnt3     | 1.57034  | 1.65975  | 0.0798924   | 0.9611   | 0.979063    | no  |
| Tnp01     | 20.0435  | 20.5174  | 0.0337073   | 0.8144   | 0.892563    | no  |
| Tnp02     | 20.4073  | 21.2501  | 0.0583846   | 0.6886   | 0.808013    | no  |
| Tnp03     | 28.8735  | 29.7435  | 0.0428297   | 0.76985  | 0.863803    | no  |
| Tnrc18    | 19.4023  | 18.9596  | -0.033299   | 0.81765  | 0.894764    | no  |
| Tnrc6a    | 28.5442  | 28.8737  | 0.016556    | 0.90785  | 0.949288    | no  |
| Tnrc6b    | 9.49117  | 9.623    | 0.0199002   | 0.892    | 0.939573    | no  |
| Tnrc6c    | 13.4354  | 14.2857  | 0.0885288   | 0.53175  | 0.682412    | no  |
| Tob1      | 47.2648  | 60.3339  | 0.352201    | 0.0146   | 0.0379571   | yes |
| Tob2      | 29.6204  | 28.0191  | -0.0801808  | 0.57555  | 0.719471    | no  |
| Toe1      | 23.148   | 23.8332  | 0.0420808   | 0.7921   | 0.878739    | no  |
| Tollip    | 28.2998  | 28.0386  | -0.0133776  | 0.9241   | 0.958677    | no  |
| Tom1      | 11.0646  | 15.0441  | 0.443241    | 0.00635  | 0.0184367   | yes |
| Tom1l2    | 5.46179  | 6.12693  | 0.165789    | 0.3464   | 0.503503    | no  |
| Tomm20    | 40.0143  | 37.9914  | -0.0748427  | 0.5945   | 0.735319    | no  |
| Tomm22    | 161.925  | 148.422  | -0.125628   | 0.378    | 0.536994    | no  |
| Tomm34    | 50.4225  | 49.8832  | -0.0155111  | 0.91735  | 0.954667    | no  |

|          |         |         |             |          |             |     |
|----------|---------|---------|-------------|----------|-------------|-----|
| Tomm40   | 23.8073 | 27.3355 | 0.199372    | 0.1993   | 0.33524     | no  |
| Tomm40l  | 12.4788 | 11.9047 | -0.0679509  | 0.66655  | 0.791814    | no  |
| Tomm5    | 102.092 | 99.4718 | -0.0375058  | 0.8111   | 0.890717    | no  |
| Tomm6    | 90.499  | 89.9728 | -0.00841401 | 0.9574   | 0.977108    | no  |
| Tomm7    | 96.8566 | 87.2249 | -0.151109   | 0.2969   | 0.448713    | no  |
| Tomm70a  | 30.5276 | 29.592  | -0.0449084  | 0.75395  | 0.853001    | no  |
| Tomt     | 1.16582 | 1.0111  | -0.205423   | 0.88655  | 0.936435    | no  |
| Tonsl    | 8.60383 | 7.89421 | -0.124184   | 0.43295  | 0.591187    | no  |
| Top1     | 32.4029 | 33.8686 | 0.0638265   | 0.65645  | 0.784238    | no  |
| Top1mt   | 1.71306 | 1.87565 | 0.130809    | 0.6438   | 0.77454     | no  |
| Top2a    | 74.1419 | 44.0084 | -0.75251    | 5.00E-05 | 0.000236281 | yes |
| Top2b    | 63.4645 | 71.0558 | 0.163004    | 0.25095  | 0.396618    | no  |
| Top3a    | 6.16123 | 7.1097  | 0.206571    | 0.2154   | 0.355784    | no  |
| Top3b    | 20.5094 | 20.569  | 0.0041861   | 0.9787   | 0.988093    | no  |
| Topbp1   | 34.5071 | 31.7873 | -0.118441   | 0.40125  | 0.560269    | no  |
| Topors   | 20.448  | 19.8952 | -0.0395435  | 0.79435  | 0.880156    | no  |
| Tor1a    | 30.4166 | 32.0982 | 0.0776357   | 0.61195  | 0.749248    | no  |
| Tor1aip1 | 41.1652 | 39.8852 | -0.0455712  | 0.80595  | 0.88745     | no  |
| Tor1aip2 | 25.9441 | 26.9607 | 0.0554465   | 0.81975  | 0.896145    | no  |
| Tor1b    | 28.7084 | 28.8043 | 0.00481113  | 0.9744   | 0.986023    | no  |
| Tor2a    | 39.7481 | 40.4218 | 0.024249    | 0.86915  | 0.92636     | no  |
| Tor3a    | 7.1438  | 8.02351 | 0.167541    | 0.3118   | 0.465451    | no  |
| Tor4a    | 35.3167 | 31.0693 | -0.184861   | 0.19635  | 0.331359    | no  |
| Tox      | 3.46166 | 5.13501 | 0.568901    | 0.00315  | 0.00997458  | yes |
| Tox4     | 26.6853 | 26.5869 | -0.00533318 | 0.9767   | 0.987034    | no  |
| Tpcn1    | 12.5732 | 14.6254 | 0.218123    | 0.1411   | 0.254624    | no  |
| Tpcn2    | 6.99989 | 7.02696 | 0.00556825  | 0.97355  | 0.985502    | no  |
| Tpd52    | 1.81283 | 2.02187 | 0.157442    | 0.5417   | 0.690935    | no  |
| Tpd52l2  | 9.75807 | 8.90292 | -0.132318   | 0.40985  | 0.568778    | no  |
| Tpgs1    | 29.2208 | 27.571  | -0.0838478  | 0.6093   | 0.747079    | no  |
| Tpgs2    | 8.53549 | 8.30331 | -0.0397875  | 0.8014   | 0.884538    | no  |
| Tpi1     | 31.3164 | 27.6387 | -0.18023    | 0.268    | 0.415462    | no  |
| Tpk1     | 2.76181 | 3.02937 | 0.133405    | 0.54055  | 0.690017    | no  |
| Tpm1     | 30.1108 | 33.4818 | 0.153094    | 0.3086   | 0.461905    | no  |
| Tpm3     | 419.384 | 397.399 | -0.0776834  | 0.5912   | 0.732483    | no  |
| Tpm4     | 203.65  | 170.894 | -0.252995   | 0.07395  | 0.150371    | no  |
| Tpp1     | 21.2893 | 18.6994 | -0.187137   | 0.2006   | 0.336848    | no  |
| Tpp2     | 43.3634 | 39.9874 | -0.116934   | 0.4098   | 0.568764    | no  |
| Tppp3    | 11.6715 | 11.2717 | -0.0502857  | 0.79925  | 0.88327     | no  |
| Tpr      | 60.5879 | 61.1233 | 0.0126934   | 0.92915  | 0.96125     | no  |
| Tpra1    | 20.741  | 20.8512 | 0.00765034  | 0.9642   | 0.98056     | no  |
| Tprgl    | 155.86  | 141.734 | -0.137065   | 0.33235  | 0.488036    | no  |
| Tprkb    | 19.4154 | 17.3463 | -0.162571   | 0.30015  | 0.452491    | no  |
| Tprn     | 6.52914 | 6.31283 | -0.0486051  | 0.7865   | 0.875057    | no  |
| Tpst1    | 1.26675 | 1.27241 | 0.00642793  | 0.98195  | 0.989605    | no  |
| Tpst2    | 173.882 | 170.838 | -0.025482   | 0.86215  | 0.92213     | no  |
| Tpt1     | 5741.05 | 5814.76 | 0.0184035   | 0.92725  | 0.960312    | no  |
| Tpx2     | 19.9928 | 11.1241 | -0.84579    | 5.00E-05 | 0.000236281 | yes |
| Tra2a    | 75.2661 | 75.2988 | 0.000628227 | 0.9974   | 0.998022    | no  |
| Tra2b    | 113.783 | 110.662 | -0.040127   | 0.77465  | 0.867108    | no  |
| Trabd    | 45.6357 | 45.8192 | 0.00578737  | 0.96775  | 0.982463    | no  |
| Tradd    | 46.189  | 43.5213 | -0.0858275  | 0.56415  | 0.709897    | no  |
| Traf1    | 67.597  | 71.8174 | 0.0873734   | 0.53125  | 0.682093    | no  |
| Traf2    | 21.1522 | 20.2809 | -0.0606828  | 0.67965  | 0.801495    | no  |
| Traf3    | 12.8817 | 13.4064 | 0.057606    | 0.6855   | 0.805688    | no  |
| Traf3ip1 | 10.7904 | 6.43271 | -0.746251   | 5.00E-05 | 0.000236281 | yes |
| Traf3ip2 | 24.3789 | 27.9655 | 0.198015    | 0.1816   | 0.31157     | no  |



|          |         |         |             |          |             |     |
|----------|---------|---------|-------------|----------|-------------|-----|
| Traf3ip3 | 112.708 | 103.621 | -0.121265   | 0.4014   | 0.560412    | no  |
| Traf4    | 8.80989 | 9.84835 | 0.160758    | 0.3221   | 0.477003    | no  |
| Traf5    | 23.6361 | 23.5287 | -0.00657335 | 0.966    | 0.981463    | no  |
| Traf6    | 16.591  | 14.9161 | -0.153526   | 0.2932   | 0.444511    | no  |
| Traf7    | 57.0295 | 53.2706 | -0.0983692  | 0.4971   | 0.651581    | no  |
| Trafd1   | 32.6197 | 33.7947 | 0.0510537   | 0.72455  | 0.832902    | no  |
| Traip    | 4.78417 | 2.40576 | -0.991774   | 5.00E-05 | 0.000236281 | yes |
| Trak1    | 19.5128 | 18.9599 | -0.0414755  | 0.77305  | 0.865894    | no  |
| Trak2    | 23.3265 | 22.0733 | -0.079666   | 0.5757   | 0.719594    | no  |
| Tram1    | 108.409 | 94.1368 | -0.203651   | 0.15495  | 0.274357    | no  |
| Tram2    | 2.94448 | 2.17028 | -0.440132   | 0.12905  | 0.237599    | no  |
| Trap1    | 52.1947 | 58.0261 | 0.152799    | 0.2897   | 0.440586    | no  |
| Trappc1  | 62.633  | 51.9366 | -0.270171   | 0.09245  | 0.181173    | no  |
| Trappc10 | 25.8913 | 23.9939 | -0.109805   | 0.4375   | 0.595511    | no  |
| Trappc11 | 16.9723 | 17.7494 | 0.064591    | 0.6535   | 0.782157    | no  |
| Trappc12 | 23.3363 | 23.1938 | -0.00883978 | 0.95265  | 0.974605    | no  |
| Trappc13 | 15.4547 | 15.5506 | 0.00893055  | 0.95685  | 0.976835    | no  |
| Trappc2  | 17.8143 | 14.011  | -0.346481   | 0.10025  | 0.193689    | no  |
| Trappc2l | 53.8607 | 48.1095 | -0.162909   | 0.3423   | 0.498972    | no  |
| Trappc3  | 39.4895 | 37.6028 | -0.0706292  | 0.6426   | 0.773597    | no  |
| Trappc4  | 50.1143 | 44.7769 | -0.162467   | 0.2921   | 0.443205    | no  |
| Trappc5  | 19.4599 | 19.9005 | 0.0322987   | 0.8385   | 0.907423    | no  |
| Trappc6a | 32.6228 | 35.7707 | 0.132896    | 0.44035  | 0.598329    | no  |
| Trappc6b | 51.4102 | 50.1801 | -0.0349404  | 0.81365  | 0.892129    | no  |
| Trappc8  | 32.2513 | 30.9402 | -0.0598765  | 0.6762   | 0.798935    | no  |
| Trappc9  | 12.8104 | 13.5903 | 0.0852662   | 0.6472   | 0.777199    | no  |
| Trat1    | 14.9875 | 36.4757 | 1.28317     | 5.00E-05 | 0.000236281 | yes |
| Trdmt1   | 5.31253 | 4.83562 | -0.1357     | 0.4737   | 0.630142    | no  |
| Treml2   | 1.14707 | 2.72622 | 1.24895     | 5.00E-05 | 0.000236281 | yes |
| Tref1    | 4.80505 | 4.97841 | 0.0511345   | 0.7641   | 0.860018    | no  |
| Trex1    | 49.8268 | 33.0899 | -0.590529   | 0.00025  | 0.00103712  | yes |
| Triap1   | 38.7053 | 37.4481 | -0.047641   | 0.7622   | 0.85866     | no  |
| Trib1    | 4.36124 | 6.81705 | 0.644409    | 0.00035  | 0.0014053   | yes |
| Trib2    | 6.86033 | 9.43754 | 0.460133    | 0.0045   | 0.0136593   | yes |
| Trib3    | 1.36041 | 1.56728 | 0.204215    | 0.49045  | 0.645441    | no  |
| Trim11   | 28.7432 | 29.9995 | 0.0617173   | 0.6769   | 0.79944     | no  |
| Trim12a  | 78.4097 | 76.6526 | -0.0326962  | 0.82165  | 0.897332    | no  |
| Trim12c  | 28.7017 | 27.6525 | -0.0537296  | 0.7049   | 0.819496    | no  |
| Trim13   | 4.45386 | 4.46648 | 0.00408291  | 0.99125  | 0.99466     | no  |
| Trim14   | 26.8617 | 23.8792 | -0.169799   | 0.24275  | 0.387511    | no  |
| Trim21   | 21.1885 | 20.4904 | -0.0483323  | 0.74365  | 0.846285    | no  |
| Trim23   | 4.83646 | 4.76579 | -0.0212365  | 0.90265  | 0.946135    | no  |
| Trim24   | 7.83207 | 6.54495 | -0.259012   | 0.0867   | 0.171774    | no  |
| Trim25   | 24.8268 | 25.8069 | 0.0558593   | 0.69205  | 0.810538    | no  |
| Trim26   | 41.981  | 42.0797 | 0.00338695  | 0.98245  | 0.989911    | no  |
| Trim27   | 19.3892 | 19.1465 | -0.0181721  | 0.9042   | 0.947141    | no  |
| Trim28   | 51.2442 | 49.4377 | -0.0517775  | 0.69945  | 0.815605    | no  |
| Trim3    | 1.86214 | 1.66785 | -0.158975   | 0.51     | 0.66334     | no  |
| Trim30a  | 44.4044 | 43.0104 | -0.0460163  | 0.7471   | 0.848652    | no  |
| Trim30d  | 3.98113 | 3.40994 | -0.223431   | 0.2349   | 0.379138    | no  |
| Trim32   | 2.90452 | 3.57665 | 0.300308    | 0.13235  | 0.242568    | no  |
| Trim33   | 14.3052 | 13.5424 | -0.0790559  | 0.5851   | 0.72753     | no  |
| Trim34a  | 14.8609 | 13.126  | -0.179098   | 0.25455  | 0.399197    | no  |
| Trim35   | 26.3898 | 28.0238 | 0.0866739   | 0.5519   | 0.699659    | no  |
| Trim36   | 1.5349  | 1.31479 | -0.223314   | 0.3229   | 0.477917    | no  |
| Trim37   | 8.35108 | 7.53389 | -0.148568   | 0.33265  | 0.488365    | no  |
| Trim39   | 26.7894 | 30.4051 | 0.18265     | 0.2045   | 0.341828    | no  |

|           |         |         |             |          |             |     |
|-----------|---------|---------|-------------|----------|-------------|-----|
| Trim41    | 16.6395 | 16.4336 | -0.017961   | 0.90285  | 0.94626     | no  |
| Trim44    | 15.8474 | 16.3668 | 0.0465279   | 0.74615  | 0.847995    | no  |
| Trim46    | 5.98073 | 5.17042 | -0.21004    | 0.25215  | 0.396819    | no  |
| Trim56    | 12.1959 | 14.2796 | 0.22756     | 0.136    | 0.247707    | no  |
| Trim59    | 27.9304 | 24.4051 | -0.194653   | 0.18635  | 0.318027    | no  |
| Trim62    | 2.64689 | 2.51146 | -0.0757744  | 0.7211   | 0.830668    | no  |
| Trim65    | 7.9104  | 7.74214 | -0.0310186  | 0.85415  | 0.917327    | no  |
| Trim68    | 7.64073 | 8.67661 | 0.18342     | 0.2994   | 0.451602    | no  |
| Trim8     | 42.9752 | 40.2978 | -0.0928045  | 0.5097   | 0.66306     | no  |
| Triobp    | 37.1293 | 35.6556 | -0.0584311  | 0.6844   | 0.805052    | no  |
| Trip10    | 2.12152 | 2.27438 | 0.100376    | 0.6796   | 0.801489    | no  |
| Trip11    | 14.8248 | 15.4693 | 0.0613875   | 0.67245  | 0.796103    | no  |
| Trip12    | 49.9004 | 55.1429 | 0.144125    | 0.30845  | 0.46171     | no  |
| Trip13    | 6.50397 | 4.5169  | -0.52599    | 0.0081   | 0.022802    | yes |
| Trip4     | 17.7133 | 17.9647 | 0.0203261   | 0.92935  | 0.9614      | no  |
| Trip6     | 4.74944 | 4.183   | -0.183219   | 0.40425  | 0.56321     | no  |
| Trit1     | 8.4263  | 8.98356 | 0.092389    | 0.605    | 0.743758    | no  |
| Trmt1     | 24.5447 | 28.1653 | 0.19851     | 0.17875  | 0.307548    | no  |
| Trmt10a   | 2.43304 | 2.16114 | -0.170974   | 0.4123   | 0.571111    | no  |
| Trmt10b   | 5.92079 | 5.2348  | -0.177655   | 0.3738   | 0.532506    | no  |
| Trmt10c   | 23.1194 | 23.3    | 0.0112245   | 0.9393   | 0.967115    | no  |
| Trmt11    | 6.65787 | 6.75213 | 0.0202806   | 0.9124   | 0.952014    | no  |
| Trmt112   | 98.1084 | 96.8347 | -0.0188528  | 0.91705  | 0.954524    | no  |
| Trmt12    | 1.6     | 1.73796 | 0.119315    | 0.5983   | 0.738389    | no  |
| Trmt13    | 5.22203 | 5.4933  | 0.0730623   | 0.7518   | 0.85166     | no  |
| Trmt1l    | 20.2996 | 20.6951 | 0.027838    | 0.8547   | 0.917778    | no  |
| Trmt2a    | 14.3979 | 13.9737 | -0.0431483  | 0.8398   | 0.908203    | no  |
| Trmt2b    | 14.2908 | 13.3563 | -0.0975635  | 0.6427   | 0.773651    | no  |
| Trmt44    | 3.65863 | 3.60781 | -0.0201821  | 0.916    | 0.953909    | no  |
| Trmt5     | 8.02987 | 8.37249 | 0.0602792   | 0.74655  | 0.8483      | no  |
| Trmt6     | 16.3099 | 14.5516 | -0.164574   | 0.2877   | 0.438272    | no  |
| Trmt61a   | 4.74261 | 5.90041 | 0.315133    | 0.11045  | 0.20979     | no  |
| Trmu      | 7.06381 | 7.99339 | 0.17836     | 0.36985  | 0.528426    | no  |
| Trnau1ap  | 25.7892 | 25.9904 | 0.0112127   | 0.94695  | 0.971322    | no  |
| Trnt1     | 18.985  | 18.0577 | -0.0722417  | 0.79815  | 0.882524    | no  |
| Troap     | 5.3365  | 2.88899 | -0.885328   | 1.00E-04 | 0.000450026 | yes |
| Trp53     | 51.821  | 55.1113 | 0.0888106   | 0.5425   | 0.69168     | no  |
| Trp53bp1  | 10.5428 | 11.3132 | 0.101751    | 0.55865  | 0.705416    | no  |
| Trp53bp2  | 11.0301 | 11.3472 | 0.0408846   | 0.7908   | 0.877959    | no  |
| Trp53i11  | 25.2967 | 27.0353 | 0.0958947   | 0.51625  | 0.66909     | no  |
| Trp53i13  | 12.5473 | 15.4377 | 0.299079    | 0.09565  | 0.186347    | no  |
| Trp53inp1 | 57.9717 | 51.7041 | -0.165069   | 0.2439   | 0.388854    | no  |
| Trp53inp2 | 2.15794 | 2.06639 | -0.0625455  | 0.76465  | 0.860349    | no  |
| Trpc1     | 1.0802  | 1.15414 | 0.0955219   | 0.72605  | 0.833988    | no  |
| Trpc4ap   | 75.4521 | 76.3254 | 0.0166035   | 0.9082   | 0.949429    | no  |
| Trpm4     | 2.80472 | 2.5804  | -0.120264   | 0.53795  | 0.68788     | no  |
| Trpm7     | 24.2327 | 24.1006 | -0.00788163 | 0.9573   | 0.977108    | no  |
| Trps1     | 1.0975  | 1.35855 | 0.307854    | 0.1042   | 0.199903    | no  |
| Trpt1     | 3.04361 | 4.20549 | 0.466489    | 0.8317   | 0.90343     | no  |
| Trpv2     | 66.5742 | 71.9864 | 0.11276     | 0.42205  | 0.580447    | no  |
| Trrap     | 20.7346 | 21.0984 | 0.0250907   | 0.85875  | 0.920092    | no  |
| Trub1     | 1.93679 | 3.20354 | 0.725999    | 0.00045  | 0.0017621   | yes |
| Trub2     | 16.8082 | 16.9885 | 0.0153979   | 0.92445  | 0.958805    | no  |
| Tsacc     | 2.74938 | 2.00817 | -0.453221   | 0.38445  | 0.54352     | no  |
| Tsc1      | 5.82928 | 6.35781 | 0.125211    | 0.40595  | 0.564909    | no  |
| Tsc2      | 15.2236 | 14.9552 | -0.0256689  | 0.91135  | 0.951327    | no  |
| Tsc22d1   | 1.60705 | 2.14614 | 0.417329    | 0.15285  | 0.271367    | no  |

|         |          |          |            |          |             |     |
|---------|----------|----------|------------|----------|-------------|-----|
| Tsc22d2 | 5.20623  | 5.65784  | 0.120014   | 0.43125  | 0.589482    | no  |
| Tsc22d3 | 44.041   | 53.2403  | 0.273673   | 0.05955  | 0.126122    | no  |
| Tsc22d4 | 125.66   | 118.355  | -0.0864128 | 0.5368   | 0.686932    | no  |
| Tsen15  | 7.4645   | 7.37569  | -0.0172691 | 0.942    | 0.968581    | no  |
| Tsen2   | 2.2217   | 2.18541  | -0.0237571 | 0.93235  | 0.96305     | no  |
| Tsen34  | 6.43201  | 6.6654   | 0.0514232  | 0.81065  | 0.8905      | no  |
| Tsen54  | 14.493   | 16.6217  | 0.197709   | 0.228    | 0.371039    | no  |
| Tsfm    | 18.0404  | 16.6482  | -0.115865  | 0.5222   | 0.674152    | no  |
| Tsg101  | 33.5941  | 30.1852  | -0.154366  | 0.3084   | 0.461665    | no  |
| Tsga10  | 2.36626  | 0.980593 | -1.27088   | 1.00E-04 | 0.000450026 | yes |
| Tshz1   | 9.83917  | 11.2651  | 0.195252   | 0.1909   | 0.324068    | no  |
| Tsn     | 39.6232  | 39.1048  | -0.0189991 | 0.89465  | 0.941258    | no  |
| Tsnax   | 39.8446  | 42.4493  | 0.0913551  | 0.5248   | 0.676408    | no  |
| Tspan13 | 35.7065  | 48.2081  | 0.43309    | 0.0028   | 0.00898766  | yes |
| Tspan14 | 39.089   | 39.6004  | 0.0187528  | 0.8995   | 0.944432    | no  |
| Tspan2  | 6.6837   | 8.77113  | 0.392115   | 0.01395  | 0.0365039   | yes |
| Tspan3  | 8.37189  | 9.44596  | 0.174144   | 0.3424   | 0.499076    | no  |
| Tspan31 | 36.6024  | 45.0864  | 0.300755   | 0.0459   | 0.101181    | no  |
| Tspan32 | 51.7504  | 42.1897  | -0.29468   | 0.04995  | 0.10869     | no  |
| Tspan4  | 2.00599  | 3.64742  | 0.86256    | 0.093    | 0.182069    | no  |
| Tspan5  | 10.1115  | 10.637   | 0.0730881  | 0.6504   | 0.779663    | no  |
| Tspo    | 240.02   | 219.228  | -0.130723  | 0.3571   | 0.51491     | no  |
| Tspyl1  | 55.8201  | 59.7759  | 0.0987794  | 0.48595  | 0.641229    | no  |
| Tspyl2  | 7.42905  | 8.12294  | 0.128824   | 0.44295  | 0.600774    | no  |
| Tspyl3  | 16.686   | 16.4781  | -0.0180906 | 0.90585  | 0.948152    | no  |
| Tspyl4  | 5.99251  | 6.62505  | 0.144771   | 0.38855  | 0.547682    | no  |
| Tsr1    | 10.5792  | 13.2415  | 0.323837   | 0.0894   | 0.176253    | no  |
| Tsr2    | 2.8901   | 3.47196  | 0.264632   | 0.1723   | 0.298743    | no  |
| Tsr3    | 36.0555  | 33.7506  | -0.0953073 | 0.84695  | 0.912565    | no  |
| Tssc1   | 22.0345  | 22.5277  | 0.0319346  | 0.83865  | 0.9075      | no  |
| Tssc4   | 12.5671  | 10.1889  | -0.302642  | 0.10925  | 0.207852    | no  |
| Tssk4   | 1.28161  | 1.31757  | 0.0399164  | 0.9159   | 0.953833    | no  |
| Tssk6   | 1.96782  | 2.22876  | 0.179647   | 0.86805  | 0.925747    | no  |
| Tst     | 1.53968  | 1.18799  | -0.374113  | 0.35205  | 0.509481    | no  |
| Tsta3   | 23.9688  | 23.7125  | -0.015508  | 0.9255   | 0.959344    | no  |
| Tstd1   | 1.45703  | 1.12859  | -0.368516  | 0.55175  | 0.699544    | no  |
| Tstd2   | 12.3238  | 12.0308  | -0.0347169 | 0.8208   | 0.896737    | no  |
| Tstd3   | 24.7239  | 20.7691  | -0.25147   | 0.25385  | 0.398329    | no  |
| Ttbk2   | 0.925852 | 1.42504  | 0.622153   | 0.00085  | 0.00311418  | yes |
| Ttc1    | 30.2308  | 26.2871  | -0.201666  | 0.1998   | 0.335873    | no  |
| Ttc13   | 35.7043  | 40.4313  | 0.179377   | 0.21125  | 0.350677    | no  |
| Ttc14   | 14.4537  | 14.3102  | -0.0143927 | 0.92045  | 0.956694    | no  |
| Ttc17   | 14.9733  | 15.1338  | 0.0153837  | 0.91695  | 0.954462    | no  |
| Ttc19   | 5.57698  | 5.38464  | -0.050633  | 0.9535   | 0.975121    | no  |
| Ttc21b  | 5.52119  | 5.68798  | 0.0429362  | 0.78915  | 0.876956    | no  |
| Ttc27   | 3.98732  | 5.05567  | 0.342484   | 0.07495  | 0.152072    | no  |
| Ttc3    | 6.65635  | 7.19473  | 0.112209   | 0.5027   | 0.656823    | no  |
| Ttc32   | 9.26337  | 8.97242  | -0.0460391 | 0.83215  | 0.90371     | no  |
| Ttc33   | 19.6405  | 17.8796  | -0.135515  | 0.3998   | 0.558841    | no  |
| Ttc37   | 5.65504  | 6.67228  | 0.238643   | 0.128    | 0.236116    | no  |
| Ttc38   | 12.156   | 13.775   | 0.180384   | 0.2351   | 0.379366    | no  |
| Ttc39b  | 27.9031  | 29.5935  | 0.0848534  | 0.55165  | 0.69948     | no  |
| Ttc39c  | 39.645   | 37.0034  | -0.0994811 | 0.48605  | 0.641325    | no  |
| Ttc4    | 20.3562  | 17.9275  | -0.183293  | 0.2259   | 0.36859     | no  |
| Ttc5    | 36.8227  | 37.7429  | 0.0356085  | 0.80835  | 0.889011    | no  |
| Ttc7    | 70.8862  | 67.7466  | -0.0653564 | 0.64595  | 0.776174    | no  |
| Ttc7b   | 33.7338  | 31.7909  | -0.0855836 | 0.5534   | 0.700969    | no  |

|         |          |         |             |          |             |     |
|---------|----------|---------|-------------|----------|-------------|-----|
| Ttc9c   | 21.1442  | 19.2377 | -0.136324   | 0.35325  | 0.510851    | no  |
| Ttf1    | 18.159   | 18.4585 | 0.0236034   | 0.87125  | 0.927688    | no  |
| Ttf2    | 11.2848  | 9.25309 | -0.286369   | 0.06085  | 0.128294    | no  |
| Tti1    | 10.5383  | 9.94411 | -0.0837318  | 0.59435  | 0.735237    | no  |
| Tti2    | 7.78842  | 8.08798 | 0.0544483   | 0.866    | 0.924455    | no  |
| Ttk     | 5.22022  | 2.69187 | -0.955499   | 5.00E-05 | 0.000236281 | yes |
| Ttl     | 2.47514  | 2.48027 | 0.00298379  | 0.99265  | 0.995428    | no  |
| Ttl1    | 4.38242  | 4.64709 | 0.0846013   | 0.689    | 0.80828     | no  |
| Ttl12   | 14.9087  | 15.001  | 0.00890367  | 0.9537   | 0.975156    | no  |
| Ttl3    | 12.3623  | 11.341  | -0.124395   | 0.8405   | 0.908779    | no  |
| Ttl4    | 5.70397  | 6.92342 | 0.279517    | 0.0889   | 0.175424    | no  |
| Ttl5    | 4.12283  | 4.33348 | 0.0718937   | 0.6764   | 0.799091    | no  |
| Ttpal   | 15.1922  | 15.1701 | -0.0021055  | 0.9867   | 0.992253    | no  |
| Ttyh3   | 20.1928  | 21.7871 | 0.109633    | 0.44615  | 0.603838    | no  |
| Tuba1a  | 96.8282  | 77.1735 | -0.327321   | 0.02195  | 0.054091    | no  |
| Tuba1b  | 152.905  | 93.7863 | -0.70519    | 5.00E-05 | 0.000236281 | yes |
| Tuba1c  | 36.2073  | 25.6233 | -0.498824   | 7.00E-04 | 0.00261609  | yes |
| Tuba4a  | 47.199   | 55.7233 | 0.239527    | 0.1888   | 0.321392    | no  |
| Tubb2a  | 3.85946  | 2.51751 | -0.6164     | 0.0171   | 0.0434656   | yes |
| Tubb3   | 4.20025  | 2.97364 | -0.498244   | 0.0407   | 0.0913676   | no  |
| Tubb4a  | 2.95136  | 3.81849 | 0.371622    | 0.09795  | 0.190114    | no  |
| Tubb4b  | 152.156  | 117.686 | -0.3706     | 0.00945  | 0.0261128   | yes |
| Tubb5   | 266.81   | 205.762 | -0.374833   | 0.00855  | 0.0239029   | yes |
| Tubb6   | 0.976503 | 1.32905 | 0.444695    | 0.2078   | 0.346155    | no  |
| Tubd1   | 7.01934  | 6.59059 | -0.0909267  | 0.63685  | 0.769075    | no  |
| Tube1   | 1.85577  | 1.5319  | -0.276699   | 0.26595  | 0.412991    | no  |
| Tubg1   | 26.3581  | 20.7189 | -0.3473     | 0.02975  | 0.0701013   | no  |
| Tubgcp2 | 15.7993  | 14.6533 | -0.108634   | 0.5747   | 0.718637    | no  |
| Tubgcp3 | 24.1054  | 22.3181 | -0.111144   | 0.436    | 0.594076    | no  |
| Tubgcp4 | 16.8831  | 17.0757 | 0.0163623   | 0.9489   | 0.972389    | no  |
| Tubgcp5 | 9.6787   | 9.52664 | -0.0228463  | 0.8829   | 0.934524    | no  |
| Tubgcp6 | 12.7692  | 12.8256 | 0.00636165  | 0.97215  | 0.984706    | no  |
| Tufm    | 58.5388  | 59.3523 | 0.0199091   | 0.89035  | 0.938609    | no  |
| Tuft1   | 1.41697  | 2.32028 | 0.711493    | 0.00705  | 0.0201982   | yes |
| Tulp3   | 1.48362  | 1.24647 | -0.251275   | 0.3285   | 0.484034    | no  |
| Tulp4   | 19.7817  | 18.4138 | -0.103385   | 0.463    | 0.620139    | no  |
| Tusc1   | 0.683073 | 1.09797 | 0.684728    | 0.12055  | 0.225049    | no  |
| Tusc2   | 14.0342  | 14.0227 | -0.00118998 | 0.99595  | 0.997151    | no  |
| Tusc3   | 24.047   | 25.592  | 0.089835    | 0.5758   | 0.719681    | no  |
| Tut1    | 10.4444  | 12.676  | 0.279374    | 0.08435  | 0.167948    | no  |
| Tvp23a  | 2.36652  | 1.99621 | -0.245502   | 0.6007   | 0.740354    | no  |
| Tvp23b  | 15.7561  | 16.4549 | 0.0626067   | 0.7065   | 0.820613    | no  |
| Twf1    | 21.3278  | 20.4357 | -0.0616417  | 0.6827   | 0.803655    | no  |
| Twf2    | 183.439  | 178.43  | -0.0399432  | 0.77835  | 0.869526    | no  |
| Twistnb | 14.235   | 15.592  | 0.131365    | 0.41045  | 0.569409    | no  |
| Twsg1   | 4.28195  | 4.91045 | 0.197586    | 0.26175  | 0.407905    | no  |
| Txk     | 35.9908  | 31.3368 | -0.199769   | 0.1751   | 0.302403    | no  |
| Txlna   | 24.8268  | 23.7097 | -0.0664211  | 0.6408   | 0.772128    | no  |
| Txlng   | 19.9903  | 21.7086 | 0.118973    | 0.65405  | 0.782603    | no  |
| Txn1    | 219.552  | 188.303 | -0.221503   | 0.12005  | 0.224294    | no  |
| Txn2    | 104.937  | 102.465 | -0.034393   | 0.80945  | 0.889736    | no  |
| Txndc11 | 21.8054  | 20.9568 | -0.0572681  | 0.73385  | 0.839409    | no  |
| Txndc12 | 28.6079  | 26.6944 | -0.0998812  | 0.65295  | 0.781737    | no  |
| Txndc15 | 25.2692  | 27.2216 | 0.107373    | 0.49175  | 0.646465    | no  |
| Txndc16 | 5.29149  | 4.7375  | -0.159548   | 0.3555   | 0.513179    | no  |
| Txndc17 | 65.3693  | 53.6722 | -0.284437   | 0.05165  | 0.111748    | no  |
| Txndc5  | 90.461   | 83.4897 | -0.115697   | 0.41605  | 0.574749    | no  |

|         |         |         |             |          |             |     |
|---------|---------|---------|-------------|----------|-------------|-----|
| Txndc9  | 17.0108 | 14.7202 | -0.20866    | 0.15605  | 0.275917    | no  |
| Txnip   | 194.617 | 196.734 | 0.015611    | 0.91445  | 0.953069    | no  |
| TxnI1   | 28.9441 | 25.1149 | -0.204722   | 0.16695  | 0.291437    | no  |
| TxnI4a  | 81.1434 | 79.0724 | -0.0372996  | 0.8051   | 0.887012    | no  |
| TxnI4b  | 4.88263 | 4.26633 | -0.194665   | 0.3726   | 0.531258    | no  |
| Txnrd1  | 52.0689 | 53.8062 | 0.0473485   | 0.74     | 0.843682    | no  |
| Txnrd2  | 5.39548 | 6.21773 | 0.204638    | 0.5089   | 0.662459    | no  |
| Tyk2    | 47.8812 | 41.3594 | -0.211246   | 0.13705  | 0.249298    | no  |
| Tyms    | 17.3614 | 15.8905 | -0.127718   | 0.3877   | 0.546855    | no  |
| Tyro3   | 2.02601 | 1.29073 | -0.650463   | 0.0044   | 0.0133909   | yes |
| Tyrobp  | 5.41259 | 4.26209 | -0.344758   | 0.33685  | 0.493054    | no  |
| Tysnd1  | 23.31   | 21.1283 | -0.141772   | 0.50215  | 0.656299    | no  |
| Tyw1    | 14.5078 | 13.9957 | -0.0518447  | 0.73635  | 0.841301    | no  |
| Tyw5    | 9.57461 | 9.20568 | -0.0566901  | 0.82695  | 0.900668    | no  |
| U2af1   | 120.32  | 124.131 | 0.0449843   | 0.7527   | 0.852201    | no  |
| U2af1I4 | 39.8506 | 38.3769 | -0.0543647  | 0.7401   | 0.843755    | no  |
| U2af2   | 149.014 | 148.671 | -0.00331841 | 0.98255  | 0.98997     | no  |
| U2surp  | 14.2681 | 13.9456 | -0.032987   | 0.8127   | 0.891697    | no  |
| Uap1    | 22.8401 | 19.9526 | -0.194987   | 0.20015  | 0.336253    | no  |
| Uap1I1  | 9.63717 | 11.2766 | 0.226656    | 0.20305  | 0.339984    | no  |
| Uba1    | 143.981 | 139.577 | -0.0448114  | 0.7538   | 0.852913    | no  |
| Uba2    | 66.8069 | 63.4367 | -0.0746795  | 0.5997   | 0.739535    | no  |
| Uba3    | 35.0911 | 29.7696 | -0.237266   | 0.1065   | 0.203497    | no  |
| Uba5    | 22.5805 | 20.3763 | -0.148189   | 0.32005  | 0.474665    | no  |
| Uba52   | 4001.74 | 3991.66 | -0.00363818 | 0.9796   | 0.988479    | no  |
| Uba6    | 5.02713 | 4.87576 | -0.0441097  | 0.7891   | 0.876941    | no  |
| Uba7    | 36.6355 | 37.8746 | 0.0479879   | 0.7395   | 0.843398    | no  |
| Ubac1   | 11.5744 | 11.7787 | 0.0252421   | 0.87005  | 0.926941    | no  |
| Ubac2   | 58.2211 | 51.8802 | -0.166358   | 0.405    | 0.563976    | no  |
| Ubald1  | 71.2813 | 70.0368 | -0.0254097  | 0.86245  | 0.922241    | no  |
| Ubald2  | 26.9548 | 23.5951 | -0.192058   | 0.52465  | 0.676301    | no  |
| Ubap1   | 21.3875 | 20.5084 | -0.0605536  | 0.686    | 0.806087    | no  |
| Ubap2   | 20.8747 | 22.4313 | 0.103756    | 0.4728   | 0.629324    | no  |
| Ubap2I  | 66.7636 | 66.1318 | -0.0137185  | 0.93495  | 0.964634    | no  |
| Ubash3a | 48.5481 | 50.1728 | 0.0474892   | 0.73615  | 0.841168    | no  |
| Ubash3b | 14.5778 | 20.7284 | 0.507834    | 0.00065  | 0.00244919  | yes |
| Ubb     | 1039.33 | 1043.13 | 0.00526143  | 0.97175  | 0.984428    | no  |
| Ubc     | 119.331 | 114.052 | -0.0652766  | 0.6458   | 0.776073    | no  |
| Ube2a   | 36.7283 | 32.6242 | -0.170951   | 0.25285  | 0.397166    | no  |
| Ube2b   | 85.7142 | 82.0041 | -0.0638376  | 0.6537   | 0.78233     | no  |
| Ube2c   | 81.2846 | 44.6212 | -0.865252   | 5.00E-05 | 0.000236281 | yes |
| Ube2d1  | 43.3265 | 44.3181 | 0.0326477   | 0.82805  | 0.901198    | no  |
| Ube2d2a | 91.6652 | 91.8524 | 0.00294255  | 0.98345  | 0.99041     | no  |
| Ube2d3  | 226.965 | 215.348 | -0.0758017  | 0.59885  | 0.738848    | no  |
| Ube2e1  | 37.1514 | 39.6767 | 0.0948737   | 0.56635  | 0.711663    | no  |
| Ube2e3  | 13.8209 | 11.6817 | -0.242595   | 0.1685   | 0.293395    | no  |
| Ube2f   | 40.2817 | 40.1398 | -0.00508971 | 0.97355  | 0.985502    | no  |
| Ube2g1  | 16.8698 | 14.3675 | -0.231628   | 0.12105  | 0.225762    | no  |
| Ube2g2  | 112.426 | 97.5395 | -0.204924   | 0.1439   | 0.258389    | no  |
| Ube2h   | 69.8116 | 70.4525 | 0.013184    | 0.92535  | 0.959259    | no  |
| Ube2i   | 158.41  | 153.694 | -0.0436041  | 0.75985  | 0.857148    | no  |
| Ube2j1  | 41.7373 | 38.7315 | -0.107828   | 0.4551   | 0.612849    | no  |
| Ube2j2  | 6.27798 | 5.82423 | -0.108233   | 0.7217   | 0.831006    | no  |
| Ube2k   | 14.6946 | 13.16   | -0.159118   | 0.2795   | 0.429058    | no  |
| Ube2I3  | 85.4154 | 85.7695 | 0.00596904  | 0.9667   | 0.981919    | no  |
| Ube2I6  | 3.13793 | 2.64166 | -0.248368   | 0.3685   | 0.527062    | no  |
| Ube2m   | 74.9994 | 69.9025 | -0.101535   | 0.49175  | 0.646465    | no  |

|        |          |         |             |         |           |     |
|--------|----------|---------|-------------|---------|-----------|-----|
| Ube2n  | 32.1382  | 29.1909 | -0.138769   | 0.3284  | 0.483947  | no  |
| Ube2o  | 6.98825  | 7.43751 | 0.0898874   | 0.5663  | 0.711626  | no  |
| Ube2q1 | 65.2475  | 62.9401 | -0.0519445  | 0.7142  | 0.825928  | no  |
| Ube2q2 | 10.8085  | 11.3348 | 0.0685888   | 0.66495 | 0.790472  | no  |
| Ube2r2 | 21.532   | 22.6152 | 0.0708103   | 0.6278  | 0.761888  | no  |
| Ube2s  | 179.234  | 141.396 | -0.342096   | 0.01685 | 0.0429523 | yes |
| Ube2t  | 12.3468  | 8.26222 | -0.579538   | 0.00585 | 0.01717   | yes |
| Ube2v1 | 98.4762  | 87.9712 | -0.162745   | 0.254   | 0.398556  | no  |
| Ube2v2 | 7.53417  | 7.17556 | -0.0703561  | 0.64605 | 0.776254  | no  |
| Ube2w  | 6.22531  | 5.56199 | -0.162545   | 0.3626  | 0.520861  | no  |
| Ube2z  | 29.2941  | 29.7036 | 0.0200265   | 0.8897  | 0.938246  | no  |
| Ube3a  | 11.429   | 11.9224 | 0.0609812   | 0.6893  | 0.808484  | no  |
| Ube3b  | 24.3867  | 24.5564 | 0.0100077   | 0.94345 | 0.96938   | no  |
| Ube3c  | 14.5655  | 14.0469 | -0.052297   | 0.72035 | 0.830115  | no  |
| Ube4a  | 28.4028  | 29.1472 | 0.0373274   | 0.7899  | 0.877415  | no  |
| Ube4b  | 18.5969  | 19.1775 | 0.044359    | 0.75785 | 0.855685  | no  |
| Ubfd1  | 7.11562  | 7.97693 | 0.164843    | 0.2943  | 0.445805  | no  |
| Ubiad1 | 4.77714  | 4.55702 | -0.0680536  | 0.7184  | 0.82864   | no  |
| Ubl3   | 40.516   | 41.0133 | 0.0175993   | 0.89945 | 0.944408  | no  |
| Ubl4   | 12.828   | 11.0961 | -0.209249   | 0.3715  | 0.530064  | no  |
| Ubl5   | 69.2689  | 74.6023 | 0.107012    | 0.50215 | 0.656299  | no  |
| Ubl7   | 50.6265  | 50.0452 | -0.0166594  | 0.91305 | 0.952439  | no  |
| Ublcp1 | 14.1395  | 14.3834 | 0.0246789   | 0.8781  | 0.931847  | no  |
| Ubn1   | 30.7642  | 30.8999 | 0.00635022  | 0.9609  | 0.97893   | no  |
| Ubn2   | 7.10347  | 7.80486 | 0.135849    | 0.3367  | 0.492875  | no  |
| Ubox5  | 2.99108  | 3.47099 | 0.214679    | 0.37515 | 0.533858  | no  |
| Ubp1   | 43.3939  | 40.7447 | -0.0908799  | 0.54465 | 0.69342   | no  |
| Ubqln1 | 39.2496  | 39.3913 | 0.00519947  | 0.9706  | 0.983969  | no  |
| Ubqln2 | 19.8298  | 20.4523 | 0.044595    | 0.75955 | 0.857015  | no  |
| Ubqln4 | 14.0046  | 15.6407 | 0.1594      | 0.2945  | 0.446003  | no  |
| Ubr1   | 13.9112  | 16.019  | 0.203532    | 0.15095 | 0.268608  | no  |
| Ubr2   | 30.4954  | 33.6085 | 0.140235    | 0.324   | 0.479093  | no  |
| Ubr3   | 9.55293  | 9.65144 | 0.0148008   | 0.9167  | 0.954324  | no  |
| Ubr4   | 34.8839  | 39.8038 | 0.190343    | 0.18725 | 0.319293  | no  |
| Ubr5   | 24.2913  | 26.5407 | 0.127767    | 0.36685 | 0.525266  | no  |
| Ubr7   | 25.3344  | 24.3193 | -0.0589932  | 0.6848  | 0.805334  | no  |
| Ubt1   | 4.78396  | 4.13772 | -0.209371   | 0.37425 | 0.532911  | no  |
| Ubt2   | 1.42276  | 1.24617 | -0.191199   | 0.47135 | 0.627844  | no  |
| Ubt3   | 67.0955  | 64.0846 | -0.0662389  | 0.6425  | 0.773503  | no  |
| Ubx1   | 131.427  | 120.412 | -0.126289   | 0.37955 | 0.538545  | no  |
| Ubx11  | 20.2286  | 17.8839 | -0.177737   | 0.27675 | 0.425791  | no  |
| Ubx2a  | 17.0688  | 20.1929 | 0.242487    | 0.1105  | 0.209845  | no  |
| Ubx2b  | 9.76619  | 8.00577 | -0.286756   | 0.06125 | 0.129007  | no  |
| Ubx4   | 34.917   | 36.0055 | 0.0442863   | 0.75445 | 0.853416  | no  |
| Ubx6   | 47.193   | 45.9154 | -0.0395954  | 0.78165 | 0.871722  | no  |
| Ubx7   | 8.17134  | 8.1262  | -0.00799181 | 0.95685 | 0.976835  | no  |
| Ubx8   | 13.342   | 12.5936 | -0.0832819  | 0.7785  | 0.869611  | no  |
| Uchl1  | 0.595523 | 1.11989 | 0.911124    | 0.07325 | 0.14918   | no  |
| Uchl3  | 33.159   | 31.2136 | -0.0872253  | 0.6031  | 0.742275  | no  |
| Uchl5  | 19.9182  | 18.865  | -0.0783716  | 0.62005 | 0.755913  | no  |
| Uck1   | 37.7864  | 36.7805 | -0.0389262  | 0.7946  | 0.88035   | no  |
| Uck2   | 46.1226  | 45.1135 | -0.0319148  | 0.8318  | 0.903524  | no  |
| Uck11  | 40.1036  | 38.152  | -0.0719735  | 0.70775 | 0.821483  | no  |
| Ucp2   | 193.902  | 166.041 | -0.223788   | 0.12335 | 0.229125  | no  |
| Uevld  | 2.94378  | 2.64408 | -0.154905   | 0.4068  | 0.565679  | no  |
| Ufc1   | 92.4526  | 83.3289 | -0.149896   | 0.30845 | 0.46171   | no  |
| Ufd1l  | 37.0071  | 35.9985 | -0.0398655  | 0.7891  | 0.876941  | no  |

|           |         |         |            |          |             |     |
|-----------|---------|---------|------------|----------|-------------|-----|
| Ufl1      | 10.7827 | 11.4333 | 0.0845256  | 0.58125  | 0.724325    | no  |
| Ufm1      | 13.7378 | 13.0178 | -0.0776618 | 0.5949   | 0.735685    | no  |
| Ufsp1     | 1.27274 | 1.02187 | -0.31673   | 0.48375  | 0.639258    | no  |
| Ufsp2     | 16.0011 | 14.154  | -0.176965  | 0.3141   | 0.467895    | no  |
| Ugcg      | 70.837  | 52.6298 | -0.428622  | 0.0031   | 0.00983478  | yes |
| Ugdh      | 26.0304 | 22.8091 | -0.190585  | 0.2054   | 0.343015    | no  |
| Uggt1     | 26.185  | 25.9531 | -0.012834  | 0.9272   | 0.960312    | no  |
| Ugp2      | 18.839  | 15.6111 | -0.271152  | 0.36625  | 0.524631    | no  |
| Uhmk1     | 23.065  | 23.3438 | 0.0173287  | 0.9076   | 0.949153    | no  |
| Uhrf1     | 27.2549 | 17.3357 | -0.652775  | 5.00E-05 | 0.000236281 | yes |
| Uhrf1bp1l | 15.8266 | 18.5064 | 0.225669   | 0.1155   | 0.217433    | no  |
| Uhrf2     | 29.7262 | 29.9939 | 0.0129322  | 0.92865  | 0.961056    | no  |
| Uimc1     | 45.0119 | 43.3457 | -0.0544174 | 0.7012   | 0.816742    | no  |
| Ul1       | 7.23557 | 7.9559  | 0.136918   | 0.3709   | 0.529486    | no  |
| Ul2       | 14.3089 | 14.0985 | -0.0213679 | 0.88305  | 0.934556    | no  |
| Ul3       | 20.2591 | 21.5373 | 0.088265   | 0.555    | 0.702214    | no  |
| Umps      | 12.3015 | 11.5736 | -0.0880035 | 0.57475  | 0.718674    | no  |
| Unc119    | 35.1869 | 30.7486 | -0.194521  | 0.209    | 0.347711    | no  |
| Unc119b   | 47.4859 | 53.5082 | 0.172262   | 0.2262   | 0.368935    | no  |
| Unc13d    | 69.3656 | 70.0517 | 0.0141993  | 0.9227   | 0.95797     | no  |
| Unc45a    | 26.5667 | 32.9343 | 0.309971   | 0.0299   | 0.0703491   | no  |
| Unc50     | 28.0807 | 28.278  | 0.0101035  | 0.9485   | 0.972248    | no  |
| Unc5a     | 1.21009 | 1.27142 | 0.0713281  | 0.78535  | 0.874329    | no  |
| Unc5cl    | 7.89825 | 3.24565 | -1.28303   | 5.00E-05 | 0.000236281 | yes |
| Unc93b1   | 12.6011 | 11.3723 | -0.148023  | 0.36885  | 0.527403    | no  |
| Ung       | 4.9888  | 3.44218 | -0.535372  | 0.0156   | 0.0401619   | yes |
| Unk       | 12.0153 | 11.8982 | -0.0141351 | 0.92185  | 0.957529    | no  |
| Unkl      | 27.8224 | 25.7911 | -0.109374  | 0.5692   | 0.713973    | no  |
| Upf1      | 37.7617 | 39.7445 | 0.0738292  | 0.6006   | 0.740283    | no  |
| Upf2      | 12.3534 | 12.8653 | 0.0585823  | 0.6939   | 0.811762    | no  |
| Upf3a     | 37.7176 | 36.6578 | -0.0411174 | 0.78655  | 0.875057    | no  |
| Upf3b     | 20.4906 | 18.6831 | -0.133229  | 0.3922   | 0.55133     | no  |
| Upk1a     | 1.76793 | 1.80917 | 0.0332699  | 0.9249   | 0.958971    | no  |
| Up1       | 5.38436 | 6.06156 | 0.170914   | 0.4782   | 0.634239    | no  |
| Uqcc1     | 10.6532 | 11.5868 | 0.121195   | 0.45635  | 0.613876    | no  |
| Uqcc2     | 85.655  | 83.1797 | -0.0423061 | 0.80425  | 0.886574    | no  |
| Uqcr10    | 235.589 | 236.762 | 0.00716292 | 0.9608   | 0.978922    | no  |
| Uqcr11    | 146.095 | 136.764 | -0.0952225 | 0.55085  | 0.698754    | no  |
| Uqcrb     | 167.046 | 167.318 | 0.00234859 | 0.98835  | 0.993134    | no  |
| Uqcrc1    | 113.244 | 108.67  | -0.0594842 | 0.6729   | 0.796422    | no  |
| Uqcrc2    | 112.533 | 107.606 | -0.0645814 | 0.652    | 0.780984    | no  |
| Uqcrfs1   | 106.837 | 93.4079 | -0.19379   | 0.17495  | 0.302233    | no  |
| Uqcrh     | 646.311 | 600.753 | -0.105457  | 0.45925  | 0.616579    | no  |
| Uqcrq     | 179.941 | 175.863 | -0.0330695 | 0.82255  | 0.89776     | no  |
| Urb1      | 4.34882 | 5.77858 | 0.410091   | 0.0089   | 0.0247598   | yes |
| Urb2      | 3.66238 | 4.67468 | 0.352086   | 0.0371   | 0.0844435   | no  |
| Urgcp     | 5.35172 | 5.79434 | 0.114642   | 0.5028   | 0.656929    | no  |
| Uri1      | 13.9696 | 19.8891 | 0.509689   | 5.00E-04 | 0.00193907  | yes |
| Urm1      | 19.6363 | 18.6017 | -0.078088  | 0.60725  | 0.745511    | no  |
| Urod      | 39.2136 | 36.6324 | -0.0982339 | 0.52425  | 0.67597     | no  |
| Uros      | 12.3867 | 12.4053 | 0.00216684 | 0.9862   | 0.99192     | no  |
| Usb1      | 25.8256 | 25.2197 | -0.0342492 | 0.8245   | 0.898984    | no  |
| Use1      | 187.24  | 193.118 | 0.0445924  | 0.7548   | 0.853607    | no  |
| Usf1      | 39.8676 | 38.7976 | -0.0392483 | 0.79495  | 0.880586    | no  |
| Usf2      | 64.8312 | 66.4555 | 0.0356998  | 0.80105  | 0.884317    | no  |
| Usmg5     | 318.12  | 290.529 | -0.130891  | 0.44905  | 0.606461    | no  |
| Uso1      | 30.1372 | 30.5414 | 0.0192208  | 0.89485  | 0.941342    | no  |

|        |          |          |             |          |             |     |
|--------|----------|----------|-------------|----------|-------------|-----|
| Usp1   | 43.2628  | 35.6633  | -0.278687   | 0.05175  | 0.111927    | no  |
| Usp10  | 12.9113  | 13.0732  | 0.017983    | 0.9049   | 0.947635    | no  |
| Usp11  | 14.8163  | 14.1935  | -0.0619526  | 0.6877   | 0.807305    | no  |
| Usp12  | 17.7002  | 18.8701  | 0.0923309   | 0.5246   | 0.676249    | no  |
| Usp14  | 14.5496  | 14.0435  | -0.0510841  | 0.7957   | 0.881002    | no  |
| Usp15  | 39.5151  | 42.4731  | 0.104148    | 0.46345  | 0.62053     | no  |
| Usp16  | 26.7948  | 25.7036  | -0.0599783  | 0.8391   | 0.907766    | no  |
| Usp18  | 59.8667  | 92.2416  | 0.623664    | 5.00E-05 | 0.000236281 | yes |
| Usp19  | 42.9727  | 42.8039  | -0.00567985 | 0.96805  | 0.982626    | no  |
| Usp20  | 15.8766  | 17.0641  | 0.104062    | 0.4769   | 0.63305     | no  |
| Usp21  | 17.3352  | 17.4201  | 0.00704864  | 0.9649   | 0.980867    | no  |
| Usp22  | 15.8353  | 16.0945  | 0.0234183   | 0.87505  | 0.929854    | no  |
| Usp24  | 22.9325  | 25.0866  | 0.12952     | 0.3647   | 0.522962    | no  |
| Usp25  | 66.1492  | 62.6941  | -0.0773945  | 0.57675  | 0.720499    | no  |
| Usp28  | 6.2469   | 9.56455  | 0.614557    | 2.00E-04 | 0.0008488   | yes |
| Usp3   | 78.1509  | 66.7886  | -0.22666    | 0.1123   | 0.212423    | no  |
| Usp30  | 13.0089  | 11.0045  | -0.241401   | 0.1313   | 0.241006    | no  |
| Usp31  | 2.66734  | 2.84954  | 0.0953287   | 0.55825  | 0.70505     | no  |
| Usp32  | 7.65825  | 8.11689  | 0.083912    | 0.58055  | 0.723683    | no  |
| Usp33  | 9.11407  | 9.92345  | 0.122748    | 0.4211   | 0.579547    | no  |
| Usp34  | 20.4898  | 21.8979  | 0.095888    | 0.55955  | 0.706072    | no  |
| Usp35  | 1.58216  | 1.24829  | -0.341943   | 0.1623   | 0.284855    | no  |
| Usp36  | 14.3214  | 15.2963  | 0.095007    | 0.5136   | 0.666524    | no  |
| Usp37  | 5.14767  | 5.16745  | 0.00553496  | 0.98585  | 0.991766    | no  |
| Usp38  | 27.1476  | 26.5295  | -0.0332258  | 0.81325  | 0.891885    | no  |
| Usp39  | 33.0037  | 31.4687  | -0.0687073  | 0.6349   | 0.767706    | no  |
| Usp4   | 50.9561  | 48.317   | -0.0767233  | 0.58275  | 0.725656    | no  |
| Usp40  | 2.4769   | 2.40376  | -0.0432405  | 0.81735  | 0.89463     | no  |
| Usp42  | 10.0077  | 9.90644  | -0.0146762  | 0.9227   | 0.95797     | no  |
| Usp45  | 8.02595  | 7.44854  | -0.107714   | 0.47825  | 0.63427     | no  |
| Usp46  | 4.23654  | 3.59823  | -0.235603   | 0.213    | 0.352885    | no  |
| Usp47  | 25.1563  | 23.6434  | -0.0894859  | 0.5288   | 0.679961    | no  |
| Usp48  | 82.1444  | 86.3812  | 0.072555    | 0.6104   | 0.748025    | no  |
| Usp49  | 2.14555  | 1.84447  | -0.218141   | 0.2707   | 0.418618    | no  |
| Usp5   | 32.9984  | 31.1619  | -0.0826126  | 0.56315  | 0.709005    | no  |
| Usp53  | 2.76473  | 4.30985  | 0.640499    | 9.00E-04 | 0.00327966  | yes |
| Usp54  | 1.05578  | 1.04456  | -0.0154088  | 0.9835   | 0.990418    | no  |
| Usp6nl | 1.21786  | 0.783035 | -0.637202   | 0.0134   | 0.035266    | yes |
| Usp7   | 40.782   | 41.6152  | 0.0291789   | 0.8332   | 0.904321    | no  |
| Usp8   | 23.3245  | 22.4715  | -0.0537456  | 0.71085  | 0.823632    | no  |
| Usp9x  | 10.963   | 11.0556  | 0.0121263   | 0.93375  | 0.96396     | no  |
| Usp11  | 16.2477  | 16.4997  | 0.0222066   | 0.8875   | 0.93692     | no  |
| Ust    | 4.53033  | 6.2096   | 0.454884    | 0.00895  | 0.0248832   | yes |
| Utf1   | 0.816997 | 1.31401  | 0.685577    | 0.1215   | 0.226433    | no  |
| Utp11l | 48.9348  | 52.2633  | 0.0949375   | 0.53815  | 0.687986    | no  |
| Utp14a | 18.3825  | 18.0736  | -0.0244492  | 0.8839   | 0.935049    | no  |
| Utp15  | 9.82122  | 10.5792  | 0.107251    | 0.4838   | 0.6393      | no  |
| Utp18  | 18.5686  | 19.4945  | 0.0701964   | 0.64195  | 0.773065    | no  |
| Utp20  | 3.73747  | 4.80701  | 0.363078    | 0.0209   | 0.0518292   | no  |
| Utp23  | 8.23177  | 7.23673  | -0.185865   | 0.2709   | 0.418835    | no  |
| Utp3   | 48.8002  | 48.9359  | 0.00400619  | 0.97875  | 0.98811     | no  |
| Utp6   | 13.9829  | 14.2715  | 0.0294796   | 0.8452   | 0.91164     | no  |
| Utrn   | 26.6782  | 30.8656  | 0.210342    | 0.1387   | 0.251076    | no  |
| Uty    | 4.96911  | 5.02686  | 0.0166699   | 0.9201   | 0.956443    | no  |
| Uvrag  | 18.6289  | 18.449   | -0.0140043  | 0.92535  | 0.959259    | no  |
| Uvssa  | 4.06765  | 4.89213  | 0.266268    | 0.0946   | 0.184643    | no  |
| Uxs1   | 7.05405  | 6.07494  | -0.215582   | 0.3316   | 0.487279    | no  |



|          |         |         |             |          |             |     |
|----------|---------|---------|-------------|----------|-------------|-----|
| Uxt      | 20.3072 | 17.5294 | -0.212216   | 0.2903   | 0.441223    | no  |
| Vac14    | 23.5353 | 24.027  | 0.029828    | 0.8368   | 0.906486    | no  |
| Vamp1    | 5.95678 | 6.00845 | 0.0124608   | 0.9416   | 0.968362    | no  |
| Vamp2    | 47.5391 | 46.8875 | -0.0199121  | 0.88765  | 0.937008    | no  |
| Vamp3    | 43.9261 | 42.627  | -0.0433083  | 0.7643   | 0.860119    | no  |
| Vamp4    | 12.3599 | 12.2856 | -0.00870989 | 0.9573   | 0.977108    | no  |
| Vamp5    | 7.00364 | 8.25485 | 0.237136    | 0.21795  | 0.358862    | no  |
| Vamp8    | 99.8538 | 125.298 | 0.327469    | 0.02725  | 0.0650993   | no  |
| Vapa     | 57.4012 | 54.1734 | -0.0834961  | 0.56705  | 0.712213    | no  |
| Vapb     | 14.77   | 14.1934 | -0.0574501  | 0.68845  | 0.807904    | no  |
| Vars     | 29.7045 | 35.2725 | 0.247862    | 0.08335  | 0.166299    | no  |
| Vars2    | 6.12862 | 7.22808 | 0.238049    | 0.14575  | 0.261014    | no  |
| Vasn     | 7.15249 | 10.1084 | 0.499032    | 0.3187   | 0.47313     | no  |
| Vasp     | 355.662 | 369.977 | 0.0569273   | 0.69985  | 0.815802    | no  |
| Vat1     | 10.807  | 10.4708 | -0.0455917  | 0.77305  | 0.865894    | no  |
| Vav1     | 59.0225 | 59.8903 | 0.021059    | 0.8875   | 0.93692     | no  |
| Vav2     | 2.04829 | 1.01244 | -1.01659    | 0.00015  | 0.000653255 | yes |
| Vav3     | 3.0853  | 4.67732 | 0.60027     | 0.00095  | 0.00343861  | yes |
| Vbp1     | 45.3399 | 46.5601 | 0.0383117   | 0.7922   | 0.878781    | no  |
| Vcl      | 3.96606 | 3.50978 | -0.176326   | 0.3108   | 0.464351    | no  |
| Vcp      | 117.495 | 114.106 | -0.0422232  | 0.76385  | 0.859819    | no  |
| Vcpip1   | 18.6985 | 19.9656 | 0.0945903   | 0.53415  | 0.684621    | no  |
| Vcpkmt   | 19.3025 | 14.2797 | -0.434819   | 0.02005  | 0.0499671   | yes |
| Vdac1    | 62.1773 | 60.6485 | -0.035915   | 0.8005   | 0.884028    | no  |
| Vdac2    | 114.2   | 107.468 | -0.0876614  | 0.54405  | 0.692956    | no  |
| Vdac3    | 67.3186 | 60.0929 | -0.163812   | 0.25855  | 0.403998    | no  |
| Vegfb    | 3.95183 | 5.08464 | 0.363626    | 0.13875  | 0.251148    | no  |
| VeZF1    | 23.3078 | 22.9825 | -0.020278   | 0.88785  | 0.937107    | no  |
| VeZt     | 3.36422 | 3.08837 | -0.123426   | 0.49555  | 0.650165    | no  |
| Vgll4    | 26.3999 | 23.9688 | -0.139375   | 0.3976   | 0.556681    | no  |
| Vhl      | 12.0208 | 13.4809 | 0.165382    | 0.295    | 0.446511    | no  |
| Vim      | 863.705 | 818.685 | -0.0772305  | 0.6157   | 0.752547    | no  |
| Vimp     | 68.9662 | 65.3991 | -0.0766194  | 0.60065  | 0.740306    | no  |
| Vipas39  | 18.8054 | 18.365  | -0.0341865  | 0.8243   | 0.898947    | no  |
| Vipr1    | 5.26904 | 8.80487 | 0.74076     | 5.00E-05 | 0.000236281 | yes |
| Vkorc1   | 12.9117 | 14.8967 | 0.206311    | 0.3392   | 0.495599    | no  |
| Vkorc1l1 | 5.0166  | 4.72652 | -0.0859319  | 0.60605  | 0.744556    | no  |
| Vma21    | 8.19886 | 7.90399 | -0.0528425  | 0.7316   | 0.837813    | no  |
| Vmac     | 5.32036 | 7.0792  | 0.412062    | 0.0334   | 0.0772728   | no  |
| Vmn1r58  | 2.96629 | 3.12003 | 0.0728978   | 0.74345  | 0.84614     | no  |
| Vmn2r96  | 1.81405 | 1.85197 | 0.0298407   | 0.91305  | 0.952439    | no  |
| Vmp1     | 29.2267 | 28.4555 | -0.038578   | 0.79155  | 0.878391    | no  |
| Vopp1    | 30.3117 | 21.4205 | -0.500885   | 0.00075  | 0.00278555  | yes |
| Vprbp    | 12.1509 | 13.0481 | 0.102773    | 0.4778   | 0.633887    | no  |
| Vps11    | 21.0072 | 20.2418 | -0.0535502  | 0.71145  | 0.824016    | no  |
| Vps13a   | 11.1845 | 12.9382 | 0.21014     | 0.13945  | 0.252201    | no  |
| Vps13b   | 13.3327 | 14.9361 | 0.163842    | 0.2415   | 0.386065    | no  |
| Vps13c   | 8.21486 | 9.26708 | 0.17388     | 0.22205  | 0.363763    | no  |
| Vps13d   | 16.1892 | 17.3254 | 0.0978638   | 0.4925   | 0.647222    | no  |
| Vps16    | 36.3614 | 33.4913 | -0.118621   | 0.475    | 0.631348    | no  |
| Vps18    | 3.64781 | 4.12858 | 0.178615    | 0.3214   | 0.476267    | no  |
| Vps25    | 88.0554 | 86.5673 | -0.0245892  | 0.86915  | 0.92636     | no  |
| Vps26a   | 18.1198 | 17.8878 | -0.0185868  | 0.9025   | 0.946118    | no  |
| Vps26b   | 24.827  | 25.2112 | 0.0221571   | 0.8823   | 0.934191    | no  |
| Vps28    | 208.781 | 206.4   | -0.0165452  | 0.91065  | 0.950891    | no  |
| Vps29    | 77.0015 | 68.1926 | -0.175271   | 0.24215  | 0.386903    | no  |
| Vps33a   | 17.2711 | 18.4229 | 0.0931415   | 0.5255   | 0.67705     | no  |

|         |         |         |             |          |             |     |
|---------|---------|---------|-------------|----------|-------------|-----|
| Vps33b  | 17.1096 | 18.3396 | 0.100156    | 0.5104   | 0.663714    | no  |
| Vps35   | 42.9938 | 39.5936 | -0.118863   | 0.3991   | 0.558128    | no  |
| Vps36   | 58.1755 | 51.5488 | -0.174473   | 0.2362   | 0.380697    | no  |
| Vps37a  | 6.56417 | 6.94365 | 0.0810818   | 0.74835  | 0.849415    | no  |
| Vps37b  | 32.0278 | 27.9638 | -0.195763   | 0.1797   | 0.308911    | no  |
| Vps37c  | 11.7883 | 12.5968 | 0.0957016   | 0.55785  | 0.704658    | no  |
| Vps39   | 18.421  | 18.1332 | -0.0227168  | 0.87925  | 0.932366    | no  |
| Vps41   | 28.3014 | 27.6482 | -0.0336912  | 0.8132   | 0.891872    | no  |
| Vps45   | 8.71828 | 8.38648 | -0.0559787  | 0.74495  | 0.847218    | no  |
| Vps4a   | 42.5755 | 36.2647 | -0.231455   | 0.11635  | 0.218742    | no  |
| Vps4b   | 45.6211 | 43.3758 | -0.0728084  | 0.59785  | 0.73804     | no  |
| Vps51   | 20.3991 | 20.0417 | -0.025501   | 0.86795  | 0.925724    | no  |
| Vps52   | 41.1166 | 40.3919 | -0.0256564  | 0.861    | 0.921514    | no  |
| Vps53   | 24.3063 | 24.586  | 0.0165055   | 0.9114   | 0.951351    | no  |
| Vps54   | 29.0566 | 34.6569 | 0.254274    | 0.1195   | 0.223509    | no  |
| Vps72   | 41.4877 | 41.4212 | -0.00231523 | 0.98825  | 0.993076    | no  |
| Vps8    | 4.95168 | 4.52435 | -0.130205   | 0.4371   | 0.59507     | no  |
| Vps9d1  | 11.5186 | 11.1838 | -0.042549   | 0.8111   | 0.890717    | no  |
| Vrk1    | 18.7774 | 20.597  | 0.133439    | 0.3659   | 0.5243      | no  |
| Vrk2    | 21.4411 | 18.2346 | -0.233701   | 0.1872   | 0.319223    | no  |
| Vrk3    | 83.5907 | 72.5919 | -0.203535   | 0.1513   | 0.269075    | no  |
| Vsig10l | 4.48556 | 4.10282 | -0.128672   | 0.48905  | 0.644079    | no  |
| Vta1    | 43.1433 | 37.2481 | -0.211968   | 0.1607   | 0.282595    | no  |
| Vti1a   | 8.84381 | 9.36199 | 0.0821466   | 0.61085  | 0.748343    | no  |
| Vti1b   | 63.9891 | 61.4698 | -0.0579473  | 0.69475  | 0.812339    | no  |
| Vwa5a   | 2.47357 | 4.66611 | 0.91563     | 5.00E-05 | 0.000236281 | yes |
| Vwa8    | 3.713   | 4.72782 | 0.348588    | 0.05425  | 0.116502    | no  |
| Vwa9    | 20.2831 | 19.0757 | -0.0885405  | 0.55765  | 0.704494    | no  |
| Wac     | 37.7155 | 37.9381 | 0.00848898  | 0.951    | 0.97375     | no  |
| Wapal   | 32.7728 | 31.6532 | -0.0501493  | 0.72335  | 0.832119    | no  |
| Wars    | 35.0297 | 31.6233 | -0.147591   | 0.3101   | 0.46362     | no  |
| Wars2   | 5.1608  | 4.60321 | -0.164954   | 0.33475  | 0.490672    | no  |
| Was     | 117.778 | 110.47  | -0.0924236  | 0.51485  | 0.667668    | no  |
| Wasf2   | 60.5568 | 59.2545 | -0.0313657  | 0.82445  | 0.898984    | no  |
| Wash    | 22.9199 | 22.6524 | -0.0169388  | 0.90735  | 0.94899     | no  |
| Wasl    | 10.5849 | 10.7998 | 0.0289848   | 0.8729   | 0.928604    | no  |
| Wbp1    | 21.9549 | 21.7817 | -0.0114252  | 0.94235  | 0.968687    | no  |
| Wbp11   | 41.4762 | 43.4058 | 0.0656055   | 0.6417   | 0.772883    | no  |
| Wbp1l   | 44.0058 | 35.9573 | -0.291411   | 0.04255  | 0.0949259   | no  |
| Wbp2    | 86.7936 | 77.1366 | -0.170174   | 0.23075  | 0.374168    | no  |
| Wbp4    | 10.512  | 9.70959 | -0.114555   | 0.81615  | 0.89376     | no  |
| Wbp5    | 27.3808 | 21.9179 | -0.321052   | 0.06415  | 0.133829    | no  |
| Wbscr16 | 4.90104 | 6.194   | 0.337783    | 0.078    | 0.157275    | no  |
| Wbscr22 | 30.5887 | 31.0697 | 0.02251     | 0.90325  | 0.946553    | no  |
| Wbscr27 | 2.03491 | 3.05238 | 0.58497     | 0.01155  | 0.0310715   | yes |
| Wdfy1   | 10.946  | 14.3524 | 0.390887    | 0.0877   | 0.173502    | no  |
| Wdfy2   | 3.03081 | 4.68858 | 0.629447    | 0.0052   | 0.0154863   | yes |
| Wdhd1   | 9.1712  | 7.08782 | -0.371769   | 0.019    | 0.0476821   | yes |
| Wdr1    | 223.705 | 197.319 | -0.181071   | 0.2068   | 0.344888    | no  |
| Wdr11   | 12.5286 | 13.4572 | 0.103147    | 0.49545  | 0.650118    | no  |
| Wdr12   | 5.47048 | 5.73654 | 0.0685119   | 0.7257   | 0.833735    | no  |
| Wdr13   | 10.8809 | 12.3601 | 0.183888    | 0.2273   | 0.370233    | no  |
| Wdr18   | 10.2731 | 11.4318 | 0.154178    | 0.32865  | 0.484184    | no  |
| Wdr20   | 8.20424 | 8.22522 | 0.00368389  | 0.98525  | 0.991501    | no  |
| Wdr24   | 15.479  | 15.0285 | -0.0426037  | 0.7748   | 0.867207    | no  |
| Wdr25   | 1.50201 | 1.75537 | 0.224881    | 0.3884   | 0.54758     | no  |
| Wdr26   | 55.8103 | 61.7266 | 0.145361    | 0.3059   | 0.458837    | no  |

|         |         |          |             |          |             |     |
|---------|---------|----------|-------------|----------|-------------|-----|
| Wdr3    | 21.522  | 22.901   | 0.0895957   | 0.54015  | 0.689681    | no  |
| Wdr31   | 1.86152 | 0.737584 | -1.3356     | 5.00E-05 | 0.000236281 | yes |
| Wdr33   | 27.6084 | 29.389   | 0.0901717   | 0.67395  | 0.797143    | no  |
| Wdr36   | 20.725  | 22.4793  | 0.117222    | 0.4319   | 0.590085    | no  |
| Wdr37   | 16.1623 | 18.2291  | 0.173607    | 0.2338   | 0.377803    | no  |
| Wdr4    | 6.56798 | 7.05473  | 0.103142    | 0.5419   | 0.691078    | no  |
| Wdr41   | 7.54769 | 8.22455  | 0.123901    | 0.44765  | 0.605056    | no  |
| Wdr43   | 25.2266 | 27.3142  | 0.114709    | 0.42295  | 0.581368    | no  |
| Wdr44   | 12.3559 | 12.0136  | -0.0405258  | 0.7871   | 0.875545    | no  |
| Wdr45   | 28.8145 | 27.0476  | -0.0912961  | 0.55535  | 0.702443    | no  |
| Wdr45b  | 26.7673 | 24.5958  | -0.122059   | 0.40695  | 0.565799    | no  |
| Wdr46   | 12.2378 | 14.8722  | 0.28127     | 0.0843   | 0.167877    | no  |
| Wdr47   | 5.37323 | 5.49654  | 0.0327339   | 0.8478   | 0.913147    | no  |
| Wdr48   | 20.1425 | 18.4774  | -0.124477   | 0.4318   | 0.590039    | no  |
| Wdr5    | 29.6999 | 26.9838  | -0.138366   | 0.3415   | 0.498073    | no  |
| Wdr53   | 13.5795 | 11.4677  | -0.243854   | 0.19695  | 0.332181    | no  |
| Wdr55   | 23.0837 | 24.2228  | 0.0694958   | 0.66215  | 0.788645    | no  |
| Wdr59   | 4.33675 | 4.6547   | 0.102075    | 0.5432   | 0.692323    | no  |
| Wdr5b   | 6.09506 | 5.61422  | -0.118554   | 0.5516   | 0.699442    | no  |
| Wdr6    | 11.0337 | 11.4213  | 0.0498137   | 0.82155  | 0.897237    | no  |
| Wdr61   | 29.0226 | 28.2313  | -0.0398826  | 0.806    | 0.887491    | no  |
| Wdr62   | 3.36965 | 2.02739  | -0.732976   | 1.00E-04 | 0.000450026 | yes |
| Wdr7    | 6.05307 | 6.10234  | 0.0116949   | 0.94015  | 0.967637    | no  |
| Wdr70   | 8.00466 | 7.57675  | -0.07926    | 0.6624   | 0.788823    | no  |
| Wdr73   | 9.22055 | 9.41089  | 0.0294788   | 0.8619   | 0.921932    | no  |
| Wdr74   | 24.7053 | 26.5736  | 0.10517     | 0.5228   | 0.674606    | no  |
| Wdr75   | 13.6905 | 15.1207  | 0.143349    | 0.3567   | 0.514501    | no  |
| Wdr76   | 6.31552 | 4.12542  | -0.614359   | 0.00025  | 0.00103712  | yes |
| Wdr77   | 13.8307 | 13.0599  | -0.0827352  | 0.8118   | 0.891125    | no  |
| Wdr78   | 2.42412 | 2.03932  | -0.249374   | 0.23995  | 0.385061    | no  |
| Wdr8    | 17.2758 | 17.2367  | -0.00326918 | 0.9861   | 0.99189     | no  |
| Wdr81   | 11.3703 | 11.9798  | 0.0753329   | 0.6068   | 0.745166    | no  |
| Wdr82   | 57.804  | 53.6364  | -0.107959   | 0.44575  | 0.603412    | no  |
| Wdr83   | 20.3197 | 19.9399  | -0.0272156  | 0.90725  | 0.948941    | no  |
| Wdr89   | 2.29223 | 2.77474  | 0.275603    | 0.24495  | 0.390035    | no  |
| Wdr90   | 4.45313 | 4.55993  | 0.0341903   | 0.9173   | 0.954657    | no  |
| Wdr91   | 12.7193 | 13.4714  | 0.0828819   | 0.60195  | 0.741403    | no  |
| Wdr92   | 7.77121 | 9.49441  | 0.28894     | 0.0782   | 0.157588    | no  |
| Wdr95   | 26.0306 | 18.8797  | -0.463372   | 0.00245  | 0.0079866   | yes |
| Wdsub1  | 3.19086 | 3.25     | 0.0264912   | 0.90585  | 0.948152    | no  |
| Wdte1   | 20.5112 | 22.0239  | 0.102662    | 0.4793   | 0.63509     | no  |
| Wdyhv1  | 31.6536 | 31.4933  | -0.00732504 | 0.96285  | 0.980057    | no  |
| Wee1    | 4.18633 | 3.18792  | -0.393072   | 0.0427   | 0.0951973   | no  |
| Wfikkn1 | 1.28272 | 1.46813  | 0.194768    | 0.48735  | 0.642511    | no  |
| Wfikkn2 | 18.1067 | 44.3874  | 1.29363     | 5.00E-05 | 0.000236281 | yes |
| Whamm   | 16.8738 | 16.3225  | -0.047918   | 0.7493   | 0.850193    | no  |
| Whsc1   | 20.3542 | 16.1052  | -0.337805   | 0.01775  | 0.0449043   | yes |
| Whsc111 | 62.9586 | 68.4203  | 0.120022    | 0.43405  | 0.592311    | no  |
| Wibg    | 76.4527 | 82.9017  | 0.116836    | 0.4277   | 0.586048    | no  |
| Wipf1   | 126.244 | 126.148  | -0.00109923 | 0.9943   | 0.996304    | no  |
| Wipf2   | 7.98892 | 8.10784  | 0.0213159   | 0.88615  | 0.936237    | no  |
| Wipi2   | 17.0928 | 17.5496  | 0.0380517   | 0.79225  | 0.878781    | no  |
| Wiz     | 13.029  | 13.3141  | 0.0312285   | 0.83495  | 0.905469    | no  |
| Wls     | 7.31234 | 14.6437  | 1.00188     | 5.00E-05 | 0.000236281 | yes |
| Wnk1    | 54.7199 | 54.8732  | 0.00403741  | 0.97715  | 0.987291    | no  |
| Wrap53  | 16.8628 | 16.229   | -0.0552679  | 0.73695  | 0.841741    | no  |
| Wrb     | 2.18781 | 2.43471  | 0.154264    | 0.5201   | 0.672191    | no  |

|          |         |         |             |         |             |     |
|----------|---------|---------|-------------|---------|-------------|-----|
| Wrn      | 14.0082 | 13.7752 | -0.0241949  | 0.86495 | 0.92389     | no  |
| Wrnip1   | 41.3591 | 43.3506 | 0.0678494   | 0.64    | 0.771493    | no  |
| Wsb1     | 32.1689 | 28.8097 | -0.159116   | 0.2805  | 0.430285    | no  |
| Wsb2     | 20.3354 | 19.9701 | -0.0261523  | 0.85675 | 0.918888    | no  |
| Wscd2    | 1.92535 | 1.59587 | -0.270779   | 0.2164  | 0.357035    | no  |
| Wtap     | 68.097  | 65.7172 | -0.0513206  | 0.74185 | 0.845123    | no  |
| Wwox     | 2.57335 | 2.74493 | 0.0931192   | 0.6915  | 0.810136    | no  |
| Wwp1     | 8.9813  | 7.91164 | -0.182946   | 0.2239  | 0.366131    | no  |
| Wwp2     | 25.1015 | 24.6618 | -0.0254962  | 0.8588  | 0.920092    | no  |
| Xab2     | 44.3873 | 44.4214 | 0.00110921  | 0.99345 | 0.995905    | no  |
| Xaf1     | 13.2886 | 11.4217 | -0.218406   | 0.1735  | 0.300308    | no  |
| Xbp1     | 29.1864 | 29.7929 | 0.0296755   | 0.83365 | 0.904573    | no  |
| Xcl1     | 3.83824 | 3.11621 | -0.300652   | 0.48845 | 0.643493    | no  |
| Xcr1     | 1.53239 | 1.39266 | -0.137942   | 0.54995 | 0.697989    | no  |
| Xdh      | 21.8567 | 15.9642 | -0.453237   | 0.0017  | 0.005774    | yes |
| Xiap     | 24.3052 | 21.7211 | -0.162166   | 0.24985 | 0.395366    | no  |
| Xk       | 1.56377 | 1.27085 | -0.299235   | 0.17995 | 0.309258    | no  |
| Xkr8     | 3.19988 | 2.3455  | -0.448123   | 0.02095 | 0.0519313   | no  |
| Xlr      | 1.79646 | 2.695   | 0.585128    | 0.0938  | 0.18335     | no  |
| Xlr3b    | 1.09902 | 2.10774 | 0.939485    | 0.00765 | 0.0217092   | yes |
| Xlr4a    | 21.3802 | 19.1994 | -0.155209   | 0.36665 | 0.525044    | no  |
| Xlr4b    | 16.5439 | 15.4719 | -0.0966458  | 0.58735 | 0.729428    | no  |
| Xlr4c    | 9.43986 | 8.57094 | -0.139312   | 0.4937  | 0.648437    | no  |
| Xndc1    | 10.5449 | 10.5462 | 0.000177904 | 0.9992  | 0.999285    | no  |
| Xntrpc   | 1.31891 | 1.67298 | 0.343071    | 0.3955  | 0.55461     | no  |
| Xpa      | 34.7    | 29.9549 | -0.212144   | 0.2057  | 0.343451    | no  |
| Xpc      | 8.64632 | 12.6881 | 0.55332     | 0.00035 | 0.0014053   | yes |
| Xpnpep1  | 30.95   | 28.4569 | -0.121158   | 0.408   | 0.566879    | no  |
| Xpnpep3  | 3.58181 | 3.38652 | -0.0808878  | 0.671   | 0.795147    | no  |
| Xpo1     | 41.499  | 45.185  | 0.122765    | 0.3757  | 0.534436    | no  |
| Xpo4     | 7.31937 | 7.30604 | -0.00262841 | 0.98755 | 0.99274     | no  |
| Xpo5     | 16.6529 | 17.3052 | 0.0554363   | 0.70785 | 0.821559    | no  |
| Xpo6     | 48.8473 | 45.7554 | -0.094336   | 0.50565 | 0.659615    | no  |
| Xpo7     | 8.6601  | 7.93175 | -0.126744   | 0.37175 | 0.530303    | no  |
| Xpot     | 12.9937 | 13.5304 | 0.0583875   | 0.6886  | 0.808013    | no  |
| Xpr1     | 6.95974 | 6.48253 | -0.102476   | 0.50125 | 0.655438    | no  |
| Xrcc1    | 19.0193 | 19.8892 | 0.0645226   | 0.6753  | 0.798219    | no  |
| Xrcc2    | 1.71149 | 1.44454 | -0.244644   | 0.326   | 0.481244    | no  |
| Xrcc3    | 3.39706 | 2.87395 | -0.241253   | 0.61955 | 0.755552    | no  |
| Xrcc4    | 12.1278 | 10.8648 | -0.158664   | 0.3832  | 0.542264    | no  |
| Xrcc5    | 10.9684 | 12.8544 | 0.228897    | 0.1587  | 0.279789    | no  |
| Xrcc6    | 16.3001 | 17.3729 | 0.0919608   | 0.55465 | 0.701973    | no  |
| Xrcc6bp1 | 4.08064 | 4.91726 | 0.269061    | 0.31035 | 0.463885    | no  |
| Xrn1     | 18.6115 | 19.5732 | 0.072687    | 0.6169  | 0.753518    | no  |
| Xrn2     | 150.628 | 151.795 | 0.0111341   | 0.934   | 0.964119    | no  |
| Xxylt1   | 5.18057 | 5.4829  | 0.0818274   | 0.8798  | 0.932627    | no  |
| Xylt1    | 4.03561 | 6.74748 | 0.741561    | 0.00015 | 0.000653255 | yes |
| Xylt2    | 13.4283 | 15.4525 | 0.202566    | 0.18195 | 0.312049    | no  |
| Yae1d1   | 2.68456 | 2.84564 | 0.0840667   | 0.67415 | 0.7973      | no  |
| Yaf2     | 11.1865 | 11.566  | 0.0481323   | 0.7724  | 0.86555     | no  |
| Yars     | 17.8686 | 16.6679 | -0.100356   | 0.5088  | 0.66239     | no  |
| Yars2    | 9.57639 | 10.6597 | 0.154618    | 0.4073  | 0.566107    | no  |
| Ybey     | 1.49525 | 1.46626 | -0.0282447  | 0.96365 | 0.980388    | no  |
| Ybx1     | 196.358 | 181.235 | -0.115626   | 0.41815 | 0.576747    | no  |
| Ybx3     | 109.103 | 103.177 | -0.0805783  | 0.5687  | 0.713562    | no  |
| Ydjc     | 5.82318 | 6.75819 | 0.214829    | 0.33255 | 0.488258    | no  |
| Yeats2   | 11.0973 | 13.2508 | 0.255876    | 0.0788  | 0.158543    | no  |

|        |         |         |             |         |          |     |
|--------|---------|---------|-------------|---------|----------|-----|
| Yeats4 | 50.1498 | 47.2527 | -0.0858485  | 0.5573  | 0.704228 | no  |
| Yif1a  | 14.0324 | 15.2044 | 0.115729    | 0.51125 | 0.664488 | no  |
| Yif1b  | 14.8729 | 16.1569 | 0.119468    | 0.51575 | 0.668577 | no  |
| Yipf1  | 59.5098 | 54.9732 | -0.114399   | 0.4434  | 0.601165 | no  |
| Yipf2  | 11.8116 | 12.6027 | 0.0935231   | 0.7753  | 0.867546 | no  |
| Yipf3  | 56.6658 | 54.4359 | -0.0579202  | 0.68145 | 0.802799 | no  |
| Yipf4  | 32.4589 | 32.2111 | -0.0110551  | 0.93885 | 0.966934 | no  |
| Yipf5  | 18.189  | 17.5916 | -0.0481773  | 0.7557  | 0.854227 | no  |
| Yipf6  | 4.8202  | 4.59026 | -0.0705166  | 0.6752  | 0.79814  | no  |
| Ykt6   | 60.6436 | 60.4469 | -0.00468796 | 0.9726  | 0.984908 | no  |
| Ylpm1  | 12.738  | 15.1008 | 0.245484    | 0.08625 | 0.171041 | no  |
| Yme11  | 36.5641 | 35.6802 | -0.0353029  | 0.79825 | 0.882593 | no  |
| Yod1   | 4.03635 | 3.97786 | -0.0210585  | 0.9366  | 0.965617 | no  |
| Ypel1  | 3.52103 | 3.07759 | -0.194196   | 0.7615  | 0.858131 | no  |
| Ypel3  | 162.789 | 149.205 | -0.125707   | 0.3767  | 0.535557 | no  |
| Ypel5  | 26.9791 | 24.7272 | -0.125739   | 0.38675 | 0.545875 | no  |
| Yrdc   | 27.2618 | 29.4237 | 0.110099    | 0.4842  | 0.639637 | no  |
| Ythdc1 | 46.6934 | 46.5964 | -0.00299922 | 0.98385 | 0.990629 | no  |
| Ythdc2 | 5.3473  | 5.38568 | 0.0103175   | 0.9466  | 0.971104 | no  |
| Ythdf1 | 32.3632 | 31.5883 | -0.0349629  | 0.8058  | 0.887382 | no  |
| Ythdf2 | 14.9799 | 14.3629 | -0.0606788  | 0.6866  | 0.806564 | no  |
| Ythdf3 | 20.4943 | 20.6446 | 0.0105411   | 0.9435  | 0.969403 | no  |
| Ywhab  | 136.587 | 123.809 | -0.14171    | 0.3191  | 0.473614 | no  |
| Ywhae  | 185.449 | 165.747 | -0.162048   | 0.2542  | 0.398798 | no  |
| Ywhag  | 29.5223 | 31.96   | 0.114462    | 0.42735 | 0.585705 | no  |
| Ywhah  | 202.658 | 180.71  | -0.165367   | 0.2493  | 0.394744 | no  |
| Ywhaq  | 242.447 | 216.261 | -0.164896   | 0.25125 | 0.396819 | no  |
| Ywhaz  | 222.737 | 208.705 | -0.0938736  | 0.5182  | 0.670607 | no  |
| Yy1    | 54.1169 | 52.4903 | -0.04403    | 0.75255 | 0.852072 | no  |
| Yy2    | 4.87112 | 4.92857 | 0.0169155   | 0.9501  | 0.973139 | no  |
| Zadh2  | 13.8652 | 13.0072 | -0.0921609  | 0.54715 | 0.695574 | no  |
| Zap70  | 168.856 | 149.498 | -0.175664   | 0.2319  | 0.375533 | no  |
| Zbed3  | 6.22991 | 8.03864 | 0.36774     | 0.05565 | 0.119114 | no  |
| Zbed4  | 11.1485 | 11.7234 | 0.0725448   | 0.62515 | 0.759913 | no  |
| Zbed6  | 18.2213 | 19.0557 | 0.0645963   | 0.82405 | 0.898799 | no  |
| Zbp1   | 73.1292 | 75.4548 | 0.0451651   | 0.791   | 0.877988 | no  |
| Zbtb1  | 22.2583 | 21.5705 | -0.0452883  | 0.75095 | 0.851189 | no  |
| Zbtb11 | 13.044  | 13.0066 | -0.0041455  | 0.9782  | 0.987801 | no  |
| Zbtb12 | 1.29498 | 1.25564 | -0.0445093  | 0.8821  | 0.934027 | no  |
| Zbtb14 | 11.6008 | 10.8671 | -0.0942486  | 0.54525 | 0.693846 | no  |
| Zbtb17 | 14.859  | 14.8718 | 0.00124182  | 0.997   | 0.99782  | no  |
| Zbtb18 | 1.73675 | 1.7931  | 0.0460614   | 0.836   | 0.906023 | no  |
| Zbtb2  | 18.1389 | 15.4518 | -0.231309   | 0.12465 | 0.231114 | no  |
| Zbtb21 | 4.75011 | 4.74241 | -0.00233867 | 0.9878  | 0.992906 | no  |
| Zbtb22 | 14.098  | 15.5296 | 0.139533    | 0.3687  | 0.527295 | no  |
| Zbtb24 | 15.9941 | 14.541  | -0.137412   | 0.37805 | 0.537043 | no  |
| Zbtb25 | 25.5339 | 25.7969 | 0.0147871   | 0.926   | 0.959693 | no  |
| Zbtb26 | 1.22585 | 1.33268 | 0.120541    | 0.59255 | 0.733692 | no  |
| Zbtb32 | 28.7172 | 31.4636 | 0.131766    | 0.3837  | 0.542743 | no  |
| Zbtb33 | 8.39928 | 8.76221 | 0.0610278   | 0.6969  | 0.813896 | no  |
| Zbtb34 | 2.06044 | 2.06213 | 0.00118412  | 0.9948  | 0.996551 | no  |
| Zbtb37 | 3.01043 | 3.751   | 0.317304    | 0.0943  | 0.184149 | no  |
| Zbtb38 | 7.65156 | 5.51025 | -0.473636   | 0.0035  | 0.010941 | yes |
| Zbtb39 | 2.24982 | 2.47506 | 0.137655    | 0.45685 | 0.614362 | no  |
| Zbtb4  | 4.34555 | 4.15385 | -0.0650895  | 0.67695 | 0.799459 | no  |
| Zbtb40 | 4.45045 | 4.64309 | 0.0611339   | 0.70355 | 0.818358 | no  |
| Zbtb41 | 4.28869 | 3.94359 | -0.12103    | 0.439   | 0.597058 | no  |

|          |          |          |             |         |           |     |
|----------|----------|----------|-------------|---------|-----------|-----|
| Zbtb42   | 4.17193  | 3.95078  | -0.0785788  | 0.66555 | 0.790999  | no  |
| Zbtb43   | 6.05151  | 5.5806   | -0.116876   | 0.4682  | 0.624875  | no  |
| Zbtb44   | 6.37447  | 6.69063  | 0.0698369   | 0.63885 | 0.770726  | no  |
| Zbtb45   | 12.8701  | 11.4011  | -0.174849   | 0.2965  | 0.448214  | no  |
| Zbtb48   | 6.98534  | 7.95465  | 0.187468    | 0.30055 | 0.452968  | no  |
| Zbtb49   | 3.18223  | 3.6928   | 0.214679    | 0.28705 | 0.437565  | no  |
| Zbtb5    | 3.89634  | 3.63471  | -0.100281   | 0.57155 | 0.716005  | no  |
| Zbtb6    | 6.15238  | 6.35326  | 0.0463536   | 0.77595 | 0.868012  | no  |
| Zbtb7a   | 24.4108  | 23.1743  | -0.0749944  | 0.5963  | 0.736732  | no  |
| Zbtb7b   | 18.154   | 17.6461  | -0.0409382  | 0.78185 | 0.87189   | no  |
| Zbtb8a   | 5.10941  | 4.5515   | -0.166816   | 0.3992  | 0.558235  | no  |
| Zbtb8os  | 84.9047  | 79.711   | -0.0910654  | 0.55555 | 0.702645  | no  |
| Zbtb9    | 11.4584  | 11.4843  | 0.00324787  | 0.98395 | 0.990673  | no  |
| Zc3h10   | 14.866   | 12.5141  | -0.248455   | 0.13145 | 0.241206  | no  |
| Zc3h11a  | 65.4801  | 64.2877  | -0.0265119  | 0.8728  | 0.928582  | no  |
| Zc3h12a  | 14.9692  | 18.4373  | 0.300627    | 0.05105 | 0.110677  | no  |
| Zc3h12d  | 11.8851  | 15.284   | 0.362871    | 0.0153  | 0.0395135 | yes |
| Zc3h13   | 15.8881  | 16.982   | 0.0960571   | 0.50025 | 0.654458  | no  |
| Zc3h14   | 31.9338  | 31.7729  | -0.00728784 | 0.9655  | 0.981181  | no  |
| Zc3h15   | 75.5826  | 68.7167  | -0.137395   | 0.33745 | 0.493676  | no  |
| Zc3h18   | 33.0914  | 34.1259  | 0.0444079   | 0.7567  | 0.854865  | no  |
| Zc3h3    | 12.2891  | 11.6703  | -0.0745428  | 0.62775 | 0.761888  | no  |
| Zc3h4    | 34.9982  | 34.1259  | -0.0364147  | 0.7997  | 0.88349   | no  |
| Zc3h6    | 1.6922   | 1.45634  | -0.216555   | 0.3153  | 0.469089  | no  |
| Zc3h7a   | 58.0737  | 57.0453  | -0.0257774  | 0.8517  | 0.915587  | no  |
| Zc3h7b   | 8.96616  | 9.54282  | 0.0899253   | 0.551   | 0.698907  | no  |
| Zc3h8    | 4.12462  | 4.44856  | 0.109079    | 0.64665 | 0.776737  | no  |
| Zc3hav1  | 156.693  | 162.526  | 0.0527296   | 0.7129  | 0.824965  | no  |
| Zc3hav1l | 0.995866 | 1.02639  | 0.0435486   | 0.84515 | 0.91164   | no  |
| Zc3hc1   | 12.4809  | 13.1779  | 0.0784009   | 0.64125 | 0.772512  | no  |
| Zc4h2    | 1.27997  | 1.40281  | 0.132206    | 0.65105 | 0.78019   | no  |
| Zcchc10  | 12.4051  | 11.2296  | -0.143617   | 0.4381  | 0.596098  | no  |
| Zcchc11  | 29.8684  | 27.7674  | -0.105224   | 0.45725 | 0.614736  | no  |
| Zcchc17  | 37.1058  | 36.371   | -0.0288551  | 0.85235 | 0.916048  | no  |
| Zcchc18  | 12.575   | 9.01121  | -0.480761   | 0.02575 | 0.0620811 | no  |
| Zcchc2   | 13.8952  | 16.4856  | 0.246618    | 0.0881  | 0.174162  | no  |
| Zcchc3   | 1.53364  | 1.59895  | 0.0601589   | 0.81235 | 0.891521  | no  |
| Zcchc4   | 4.99949  | 5.16795  | 0.0478101   | 0.81625 | 0.893828  | no  |
| Zcchc6   | 34.2992  | 34.9413  | 0.026757    | 0.8488  | 0.913762  | no  |
| Zcchc7   | 29.1966  | 32.5553  | 0.157092    | 0.28815 | 0.438796  | no  |
| Zcchc8   | 20.4727  | 20.3717  | -0.00713454 | 0.96195 | 0.979661  | no  |
| Zcchc9   | 18.6243  | 17.2451  | -0.111003   | 0.4992  | 0.653411  | no  |
| Zcrb1    | 53.1427  | 50.6814  | -0.0684126  | 0.66555 | 0.790999  | no  |
| Zcwpw1   | 2.23479  | 2.02499  | -0.142224   | 0.5986  | 0.738656  | no  |
| Zdhhc1   | 1.15438  | 0.987603 | -0.225112   | 0.50385 | 0.657948  | no  |
| Zdhhc12  | 12.4345  | 14.3059  | 0.202261    | 0.2908  | 0.441793  | no  |
| Zdhhc13  | 10.7078  | 10.8262  | 0.0158645   | 0.9243  | 0.958705  | no  |
| Zdhhc15  | 8.88633  | 6.8993   | -0.365139   | 0.01735 | 0.0440075 | yes |
| Zdhhc16  | 13.0971  | 13.113   | 0.0017574   | 0.9965  | 0.997475  | no  |
| Zdhhc17  | 8.95565  | 9.12897  | 0.0276531   | 0.8591  | 0.920178  | no  |
| Zdhhc18  | 104.465  | 105.205  | 0.0101872   | 0.9431  | 0.96919   | no  |
| Zdhhc2   | 15.8774  | 13.5435  | -0.229373   | 0.14565 | 0.260874  | no  |
| Zdhhc20  | 50.9962  | 44.433   | -0.19876    | 0.16125 | 0.283351  | no  |
| Zdhhc21  | 8.14543  | 7.62189  | -0.0958424  | 0.50715 | 0.660867  | no  |
| Zdhhc24  | 3.22463  | 2.74292  | -0.233422   | 0.29885 | 0.450936  | no  |
| Zdhhc3   | 15.7814  | 16.5038  | 0.0645748   | 0.65265 | 0.781497  | no  |
| Zdhhc4   | 31.9457  | 30.0469  | -0.088406   | 0.57315 | 0.717398  | no  |

|         |          |          |              |          |             |     |
|---------|----------|----------|--------------|----------|-------------|-----|
| Zdhhc5  | 22.0413  | 22.0263  | -0.000981299 | 0.99505  | 0.996674    | no  |
| Zdhhc6  | 21.5101  | 20.9026  | -0.0413316   | 0.78775  | 0.875923    | no  |
| Zdhhc7  | 31.824   | 30.5947  | -0.0568364   | 0.6993   | 0.815556    | no  |
| Zdhhc8  | 11.8038  | 12.5277  | 0.085872     | 0.56665  | 0.71185     | no  |
| Zdhhc9  | 7.62667  | 5.85617  | -0.381094    | 0.02995  | 0.0704362   | no  |
| Zeb1    | 5.442    | 7.47788  | 0.458492     | 0.0031   | 0.00983478  | yes |
| Zeb2    | 28.8002  | 10.8786  | -1.40459     | 5.00E-05 | 0.000236281 | yes |
| Zer1    | 22.029   | 21.759   | -0.0177946   | 0.89985  | 0.944589    | no  |
| Zfand1  | 15.2197  | 15.3285  | 0.0102756    | 0.95245  | 0.974584    | no  |
| Zfand2a | 12.9786  | 12.4835  | -0.0561215   | 0.7168   | 0.827592    | no  |
| Zfand2b | 28.6477  | 29.8191  | 0.0578197    | 0.7167   | 0.827517    | no  |
| Zfand3  | 26.648   | 24.224   | -0.137586    | 0.35755  | 0.515401    | no  |
| Zfand4  | 3.17111  | 2.54317  | -0.318357    | 0.1289   | 0.23741     | no  |
| Zfand5  | 10.7184  | 9.41347  | -0.187287    | 0.19825  | 0.333919    | no  |
| Zfand6  | 80.3267  | 80.3005  | -0.000471333 | 0.99745  | 0.998044    | no  |
| Zfat    | 1.99399  | 1.65045  | -0.272802    | 0.2006   | 0.336848    | no  |
| Zfc3h1  | 19.5237  | 18.189   | -0.102156    | 0.4625   | 0.619599    | no  |
| Zfhx2   | 7.87695  | 8.29314  | 0.074282     | 0.63275  | 0.766038    | no  |
| Zfml    | 21.3219  | 23.0833  | 0.11451      | 0.43015  | 0.588446    | no  |
| Zfp1    | 6.05817  | 6.09217  | 0.0080742    | 0.96745  | 0.982271    | no  |
| Zfp101  | 2.40104  | 2.10802  | -0.187768    | 0.42725  | 0.585636    | no  |
| Zfp106  | 19.6401  | 20.416   | 0.0559003    | 0.69915  | 0.815511    | no  |
| Zfp109  | 0.731594 | 1.08864  | 0.573416     | 0.07755  | 0.156542    | no  |
| Zfp11   | 1.10307  | 0.821577 | -0.425063    | 0.1171   | 0.219865    | no  |
| Zfp110  | 18.8893  | 19.4169  | 0.0397426    | 0.7864   | 0.874973    | no  |
| Zfp113  | 2.6123   | 3.03641  | 0.217044     | 0.214    | 0.35411     | no  |
| Zfp119a | 1.10287  | 1.10065  | -0.00291236  | 0.97745  | 0.987453    | no  |
| Zfp12   | 8.23597  | 8.6245   | 0.0665027    | 0.6647   | 0.790268    | no  |
| Zfp120  | 7.64232  | 6.26512  | -0.28667     | 0.0805   | 0.161448    | no  |
| Zfp128  | 0.773376 | 1.05898  | 0.45343      | 0.1089   | 0.207297    | no  |
| Zfp142  | 6.80313  | 6.74699  | -0.0119526   | 0.96435  | 0.980619    | no  |
| Zfp143  | 13.8673  | 12.8834  | -0.106176    | 0.49465  | 0.649346    | no  |
| Zfp146  | 16.8741  | 18.2952  | 0.116652     | 0.46775  | 0.624463    | no  |
| Zfp148  | 12.6877  | 12.2842  | -0.0466228   | 0.7448   | 0.847102    | no  |
| Zfp157  | 2.87907  | 2.76731  | -0.0571204   | 0.74865  | 0.849687    | no  |
| Zfp160  | 5.29542  | 5.02547  | -0.0754883   | 0.66135  | 0.788077    | no  |
| Zfp169  | 5.14571  | 5.71644  | 0.151748     | 0.3703   | 0.528887    | no  |
| Zfp180  | 15.5601  | 13.2057  | -0.236694    | 0.1094   | 0.208098    | no  |
| Zfp182  | 10.6038  | 9.74119  | -0.122407    | 0.40075  | 0.559737    | no  |
| Zfp189  | 1.86624  | 1.61875  | -0.205256    | 0.40325  | 0.562227    | no  |
| Zfp191  | 13.421   | 13.5002  | 0.008487     | 0.955    | 0.975976    | no  |
| Zfp207  | 90.9101  | 88.3199  | -0.0417035   | 0.7733   | 0.866119    | no  |
| Zfp212  | 12.6651  | 12.5644  | -0.0115151   | 0.94195  | 0.968581    | no  |
| Zfp213  | 7.00246  | 6.3123   | -0.149697    | 0.4042   | 0.563151    | no  |
| Zfp217  | 18.3568  | 22.172   | 0.272429     | 0.05745  | 0.12235     | no  |
| Zfp219  | 3.25469  | 3.47632  | 0.0950442    | 0.64975  | 0.779129    | no  |
| Zfp235  | 2.26736  | 2.1784   | -0.0577441   | 0.79095  | 0.877987    | no  |
| Zfp236  | 12.5279  | 13.444   | 0.101824     | 0.47835  | 0.634367    | no  |
| Zfp239  | 0.999057 | 1.06574  | 0.0932193    | 0.76055  | 0.857622    | no  |
| Zfp251  | 11.9383  | 11.3432  | -0.0737664   | 0.6257   | 0.760333    | no  |
| Zfp26   | 4.04988  | 4.4975   | 0.151244     | 0.31825  | 0.472591    | no  |
| Zfp260  | 20.6682  | 18.751   | -0.140447    | 0.33195  | 0.487621    | no  |
| Zfp263  | 19.3936  | 20.5463  | 0.0832997    | 0.5721   | 0.716414    | no  |
| Zfp266  | 7.93512  | 8.53718  | 0.105507     | 0.4848   | 0.640142    | no  |
| Zfp27   | 2.30409  | 1.93206  | -0.254062    | 0.24405  | 0.389032    | no  |
| Zfp273  | 2.31856  | 2.20909  | -0.0697715   | 0.77335  | 0.866147    | no  |
| Zfp275  | 6.85335  | 7.00706  | 0.0320005    | 0.83255  | 0.903961    | no  |

|         |          |         |             |         |           |     |
|---------|----------|---------|-------------|---------|-----------|-----|
| Zfp276  | 10.8128  | 11.1841 | 0.0487129   | 0.7777  | 0.86913   | no  |
| Zfp277  | 19.7547  | 18.3064 | -0.10985    | 0.4825  | 0.63812   | no  |
| Zfp28   | 0.950914 | 1.00022 | 0.0729248   | 0.7837  | 0.873167  | no  |
| Zfp280b | 6.34373  | 6.99194 | 0.14036     | 0.3757  | 0.534436  | no  |
| Zfp280c | 9.42373  | 10.1568 | 0.108079    | 0.49115 | 0.645965  | no  |
| Zfp280d | 9.2306   | 9.99761 | 0.115158    | 0.453   | 0.61058   | no  |
| Zfp281  | 7.68583  | 7.70571 | 0.00372715  | 0.97985 | 0.98859   | no  |
| Zfp282  | 4.53047  | 5.62966 | 0.313388    | 0.05755 | 0.122537  | no  |
| Zfp287  | 3.43302  | 3.02957 | -0.180369   | 0.32585 | 0.481113  | no  |
| Zfp292  | 12.9644  | 14.7525 | 0.186406    | 0.1954  | 0.330088  | no  |
| Zfp296  | 1.78256  | 2.67176 | 0.583845    | 0.049   | 0.106913  | no  |
| Zfp3    | 7.57127  | 8.0995  | 0.097298    | 0.60265 | 0.741838  | no  |
| Zfp317  | 16.4557  | 15.9761 | -0.0426686  | 0.7759  | 0.86797   | no  |
| Zfp318  | 3.8419   | 4.49004 | 0.22491     | 0.2482  | 0.39354   | no  |
| Zfp319  | 8.77484  | 8.2547  | -0.0881579  | 0.57925 | 0.722599  | no  |
| Zfp322a | 4.90138  | 4.52862 | -0.114118   | 0.49715 | 0.651622  | no  |
| Zfp324  | 1.15832  | 1.07966 | -0.101453   | 0.68255 | 0.803591  | no  |
| Zfp326  | 8.54698  | 9.73421 | 0.187649    | 0.2715  | 0.419551  | no  |
| Zfp329  | 2.90443  | 2.89131 | -0.00653462 | 0.96995 | 0.983692  | no  |
| Zfp330  | 36.4356  | 34.2974 | -0.0872468  | 0.56285 | 0.708754  | no  |
| Zfp335  | 24.3375  | 26.4119 | 0.118006    | 0.4114  | 0.570301  | no  |
| Zfp341  | 3.5678   | 3.57329 | 0.00222066  | 0.9916  | 0.994884  | no  |
| Zfp346  | 11.4603  | 11.2207 | -0.0304819  | 0.842   | 0.909746  | no  |
| Zfp35   | 9.2641   | 9.46607 | 0.0311143   | 0.8471  | 0.912671  | no  |
| Zfp358  | 4.04403  | 3.67321 | -0.138751   | 0.53645 | 0.686658  | no  |
| Zfp36   | 303.77   | 352.018 | 0.212672    | 0.136   | 0.247707  | no  |
| Zfp362  | 16.4132  | 19.1826 | 0.224944    | 0.1381  | 0.250474  | no  |
| Zfp367  | 7.55721  | 5.67978 | -0.412018   | 0.01785 | 0.0451298 | yes |
| Zfp369  | 5.99227  | 7.25322 | 0.275518    | 0.1178  | 0.22095   | no  |
| Zfp3611 | 71.0675  | 75.6198 | 0.0895738   | 0.5254  | 0.676934  | no  |
| Zfp3612 | 417.351  | 357.68  | -0.222592   | 0.14425 | 0.258886  | no  |
| Zfp382  | 5.77438  | 4.21353 | -0.454639   | 0.02505 | 0.06064   | no  |
| Zfp383  | 1.43441  | 1.34526 | -0.092577   | 0.73265 | 0.83858   | no  |
| Zfp384  | 38.8573  | 38.1863 | -0.0251288  | 0.86125 | 0.92164   | no  |
| Zfp385c | 4.7862   | 4.14649 | -0.206988   | 0.31815 | 0.472482  | no  |
| Zfp386  | 16.2272  | 20.0877 | 0.307894    | 0.0341  | 0.0786166 | no  |
| Zfp39   | 4.51927  | 4.58479 | 0.0207666   | 0.903   | 0.946347  | no  |
| Zfp395  | 5.23805  | 7.44563 | 0.507365    | 0.00245 | 0.0079866 | yes |
| Zfp397  | 5.56326  | 5.62539 | 0.0160216   | 0.9205  | 0.956718  | no  |
| Zfp398  | 4.89236  | 5.48214 | 0.164211    | 0.3581  | 0.515972  | no  |
| Zfp40   | 3.49741  | 3.02003 | -0.211727   | 0.2592  | 0.404807  | no  |
| Zfp407  | 3.90036  | 3.84098 | -0.0221334  | 0.89205 | 0.939573  | no  |
| Zfp408  | 7.64747  | 7.52988 | -0.0223547  | 0.89755 | 0.943199  | no  |
| Zfp41   | 2.35307  | 1.98696 | -0.243977   | 0.2551  | 0.399846  | no  |
| Zfp410  | 16.0138  | 16.4651 | 0.0400964   | 0.7953  | 0.88078   | no  |
| Zfp414  | 27.4207  | 26.0375 | -0.0746738  | 0.6462  | 0.776382  | no  |
| Zfp420  | 2.11809  | 2.33388 | 0.13997     | 0.53305 | 0.683496  | no  |
| Zfp422  | 10.2722  | 11.8185 | 0.202311    | 0.1997  | 0.335752  | no  |
| Zfp426  | 13.3218  | 13.231  | -0.00987029 | 0.94815 | 0.972115  | no  |
| Zfp429  | 11.077   | 10.1695 | -0.123315   | 0.47455 | 0.630963  | no  |
| Zfp438  | 1.07189  | 1.08343 | 0.0154515   | 0.9486  | 0.972294  | no  |
| Zfp444  | 5.42554  | 5.49477 | 0.018292    | 0.91125 | 0.951265  | no  |
| Zfp445  | 23.8665  | 26.0057 | 0.123838    | 0.38025 | 0.539235  | no  |
| Zfp446  | 1.19317  | 1.08217 | -0.140867   | 0.54915 | 0.697325  | no  |
| Zfp451  | 12.4089  | 14.1263 | 0.187013    | 0.25195 | 0.396819  | no  |
| Zfp456  | 4.30008  | 3.72005 | -0.209042   | 0.2475  | 0.392686  | no  |
| Zfp459  | 1.40588  | 1.87904 | 0.418527    | 0.08565 | 0.170033  | no  |



|         |         |         |             |         |           |     |
|---------|---------|---------|-------------|---------|-----------|-----|
| Zfp46   | 4.12129 | 4.08367 | -0.0132298  | 0.93935 | 0.967152  | no  |
| Zfp472  | 11.2853 | 10.9236 | -0.0470002  | 0.77585 | 0.867942  | no  |
| Zfp488  | 23.0885 | 22.3526 | -0.0467352  | 0.74645 | 0.848241  | no  |
| Zfp507  | 7.83758 | 9.18448 | 0.22879     | 0.12455 | 0.230977  | no  |
| Zfp51   | 14.4564 | 13.8508 | -0.0617366  | 0.698   | 0.814708  | no  |
| Zfp511  | 37.7142 | 35.323  | -0.0945006  | 0.67065 | 0.794905  | no  |
| Zfp512  | 10.7355 | 8.78307 | -0.289598   | 0.07065 | 0.144922  | no  |
| Zfp513  | 13.1804 | 12.0215 | -0.132786   | 0.909   | 0.949801  | no  |
| Zfp518a | 9.1891  | 9.24163 | 0.00822453  | 0.95745 | 0.977108  | no  |
| Zfp52   | 14.6356 | 14.4892 | -0.0145084  | 0.9237  | 0.958407  | no  |
| Zfp523  | 2.7052  | 3.7031  | 0.452999    | 0.03335 | 0.0771723 | no  |
| Zfp524  | 25.214  | 21.3034 | -0.243139   | 0.15115 | 0.268876  | no  |
| Zfp526  | 4.80457 | 5.171   | 0.106036    | 0.5543  | 0.701693  | no  |
| Zfp53   | 17.6499 | 16.6782 | -0.0816979  | 0.58865 | 0.730516  | no  |
| Zfp54   | 4.32869 | 3.33197 | -0.377553   | 0.0662  | 0.13725   | no  |
| Zfp553  | 7.49144 | 8.1415  | 0.120053    | 0.49235 | 0.647061  | no  |
| Zfp560  | 1.71422 | 1.35451 | -0.339784   | 0.12445 | 0.230816  | no  |
| Zfp566  | 3.34722 | 4.37423 | 0.386068    | 0.10455 | 0.200401  | no  |
| Zfp568  | 4.02216 | 4.73182 | 0.234425    | 0.1422  | 0.256157  | no  |
| Zfp574  | 8.55201 | 7.84634 | -0.124244   | 0.43725 | 0.595217  | no  |
| Zfp579  | 6.15772 | 6.80766 | 0.144763    | 0.43905 | 0.597091  | no  |
| Zfp58   | 3.38936 | 3.82524 | 0.174539    | 0.41515 | 0.573921  | no  |
| Zfp580  | 2.89601 | 3.58375 | 0.307405    | 0.29455 | 0.44604   | no  |
| Zfp59   | 2.09732 | 2.53835 | 0.275348    | 0.19355 | 0.327558  | no  |
| Zfp592  | 19.3116 | 20.1697 | 0.0627212   | 0.66355 | 0.789572  | no  |
| Zfp593  | 6.08821 | 7.37432 | 0.276492    | 0.1883  | 0.320727  | no  |
| Zfp595  | 3.37446 | 3.5668  | 0.0799711   | 0.67165 | 0.79553   | no  |
| Zfp597  | 6.7627  | 5.7963  | -0.222467   | 0.15745 | 0.277967  | no  |
| Zfp598  | 30.2545 | 29.3616 | -0.0432227  | 0.7623  | 0.85869   | no  |
| Zfp60   | 3.44305 | 3.49549 | 0.0218061   | 0.90955 | 0.950122  | no  |
| Zfp605  | 3.88648 | 3.75255 | -0.0505934  | 0.79015 | 0.87761   | no  |
| Zfp606  | 2.10826 | 2.45451 | 0.219384    | 0.29895 | 0.451058  | no  |
| Zfp607  | 3.61029 | 3.9847  | 0.142356    | 0.4402  | 0.598194  | no  |
| Zfp609  | 1.79027 | 2.21469 | 0.306923    | 0.08375 | 0.166951  | no  |
| Zfp61   | 4.8191  | 4.95024 | 0.0387336   | 0.84095 | 0.909015  | no  |
| Zfp617  | 7.32756 | 6.69919 | -0.129348   | 0.44585 | 0.603502  | no  |
| Zfp62   | 20.4755 | 21.011  | 0.037245    | 0.79945 | 0.883352  | no  |
| Zfp622  | 38.7526 | 37.0093 | -0.0664058  | 0.64005 | 0.771514  | no  |
| Zfp623  | 2.08643 | 3.26532 | 0.646186    | 0.0068  | 0.0195677 | yes |
| Zfp628  | 8.80627 | 8.82234 | 0.00263084  | 0.98985 | 0.993863  | no  |
| Zfp637  | 10.4555 | 8.77209 | -0.253264   | 0.224   | 0.366269  | no  |
| Zfp639  | 19.2595 | 17.969  | -0.100062   | 0.52445 | 0.676166  | no  |
| Zfp64   | 9.151   | 9.85705 | 0.107226    | 0.51595 | 0.668799  | no  |
| Zfp644  | 5.87639 | 5.59171 | -0.0716395  | 0.6535  | 0.782157  | no  |
| Zfp646  | 20.7072 | 20.6797 | -0.00191649 | 0.9905  | 0.994205  | no  |
| Zfp65   | 4.92011 | 5.23418 | 0.0892745   | 0.61115 | 0.748567  | no  |
| Zfp652  | 14.6196 | 18.1225 | 0.309879    | 0.04625 | 0.101841  | no  |
| Zfp653  | 9.85103 | 10.4007 | 0.0783348   | 0.75975 | 0.857117  | no  |
| Zfp654  | 17.7988 | 17.7107 | -0.00716267 | 0.9625  | 0.979895  | no  |
| Zfp655  | 19.783  | 16.6028 | -0.252833   | 0.12425 | 0.23053   | no  |
| Zfp658  | 5.13182 | 5.56856 | 0.117831    | 0.5033  | 0.657436  | no  |
| Zfp661  | 1.5422  | 1.49612 | -0.0437657  | 0.8634  | 0.922824  | no  |
| Zfp664  | 18.2289 | 20.2214 | 0.149652    | 0.2995  | 0.451685  | no  |
| Zfp667  | 1.10041 | 1.14535 | 0.0577544   | 0.823   | 0.89807   | no  |
| Zfp668  | 6.92201 | 6.25392 | -0.146429   | 0.38955 | 0.548708  | no  |
| Zfp672  | 19.9968 | 18.1848 | -0.137038   | 0.669   | 0.793616  | no  |
| Zfp677  | 8.6129  | 8.24455 | -0.0630578  | 0.71205 | 0.824373  | no  |

|         |         |          |             |          |             |     |
|---------|---------|----------|-------------|----------|-------------|-----|
| Zfp68   | 12.8345 | 12.3262  | -0.0582989  | 0.69635  | 0.813563    | no  |
| Zfp687  | 6.99397 | 7.34481  | 0.070613    | 0.79885  | 0.883021    | no  |
| Zfp688  | 12.8411 | 11.9362  | -0.105429   | 0.60115  | 0.740754    | no  |
| Zfp689  | 1.93818 | 1.85354  | -0.064417   | 0.7728   | 0.865765    | no  |
| Zfp69   | 9.9758  | 2.54915  | -1.96842    | 5.00E-05 | 0.000236281 | yes |
| Zfp691  | 3.28029 | 2.80528  | -0.225678   | 0.3839   | 0.542982    | no  |
| Zfp692  | 12.441  | 11.6018  | -0.100753   | 0.55075  | 0.698678    | no  |
| Zfp7    | 11.2478 | 10.804   | -0.0580697  | 0.72055  | 0.830278    | no  |
| Zfp703  | 6.57585 | 6.16564  | -0.0929268  | 0.59015  | 0.731747    | no  |
| Zfp706  | 29.5217 | 28.5609  | -0.0477383  | 0.73945  | 0.843396    | no  |
| Zfp707  | 11.0796 | 11.0632  | -0.00213684 | 0.9938   | 0.9961      | no  |
| Zfp708  | 1.0297  | 0.870942 | -0.24157    | 0.4798   | 0.635573    | no  |
| Zfp709  | 2.8032  | 2.97982  | 0.0881527   | 0.6481   | 0.77783     | no  |
| Zfp710  | 3.07955 | 3.30597  | 0.102352    | 0.5799   | 0.723179    | no  |
| Zfp712  | 2.58739 | 3.05625  | 0.240265    | 0.2131   | 0.353018    | no  |
| Zfp715  | 9.31462 | 10.0775  | 0.113575    | 0.46365  | 0.620692    | no  |
| Zfp719  | 1.58    | 1.5608   | -0.0176436  | 0.9314   | 0.962533    | no  |
| Zfp738  | 3.85611 | 3.76958  | -0.032742   | 0.8537   | 0.916983    | no  |
| Zfp74   | 3.40225 | 3.7691   | 0.147732    | 0.4334   | 0.591619    | no  |
| Zfp740  | 34.8834 | 33.6693  | -0.051108   | 0.7163   | 0.827339    | no  |
| Zfp746  | 18.4509 | 20.1916  | 0.130065    | 0.37335  | 0.531994    | no  |
| Zfp747  | 4.7729  | 4.80148  | 0.0086136   | 0.96475  | 0.9808      | no  |
| Zfp748  | 3.41904 | 3.40095  | -0.00764987 | 0.96715  | 0.98215     | no  |
| Zfp758  | 7.99177 | 8.17483  | 0.0326741   | 0.84815  | 0.913356    | no  |
| Zfp759  | 1.01762 | 1.0554   | 0.0525903   | 0.84655  | 0.91226     | no  |
| Zfp760  | 1.49262 | 1.01549  | -0.555669   | 0.0281   | 0.0667976   | no  |
| Zfp763  | 1.95809 | 2.02336  | 0.0473036   | 0.83635  | 0.906263    | no  |
| Zfp764  | 3.90754 | 4.70339  | 0.267438    | 0.183    | 0.313485    | no  |
| Zfp770  | 3.20839 | 2.96796  | -0.112381   | 0.5449   | 0.693625    | no  |
| Zfp771  | 4.92205 | 5.81358  | 0.240168    | 0.31825  | 0.472591    | no  |
| Zfp772  | 1.48211 | 1.54273  | 0.057836    | 0.8274   | 0.900908    | no  |
| Zfp775  | 2.71845 | 2.62957  | -0.0479589  | 0.8092   | 0.889655    | no  |
| Zfp777  | 11.7992 | 13.5633  | 0.201018    | 0.19135  | 0.324691    | no  |
| Zfp780b | 2.87307 | 2.66244  | -0.109842   | 0.54265  | 0.691797    | no  |
| Zfp784  | 3.53969 | 3.11441  | -0.184662   | 0.41905  | 0.577683    | no  |
| Zfp787  | 7.96744 | 8.79934  | 0.143279    | 0.4361   | 0.594155    | no  |
| Zfp788  | 3.76726 | 4.28323  | 0.185183    | 0.3101   | 0.46362     | no  |
| Zfp790  | 4.0499  | 4.47301  | 0.143359    | 0.40665  | 0.56556     | no  |
| Zfp799  | 2.69884 | 2.85777  | 0.0825496   | 0.6679   | 0.792797    | no  |
| Zfp800  | 13.4558 | 13.5652  | 0.0116757   | 0.9384   | 0.96671     | no  |
| Zfp808  | 3.75314 | 3.27     | -0.198806   | 0.3181   | 0.472438    | no  |
| Zfp809  | 18.0556 | 15.2468  | -0.243939   | 0.1471   | 0.262964    | no  |
| Zfp81   | 3.34875 | 3.67782  | 0.135229    | 0.53655  | 0.686724    | no  |
| Zfp810  | 6.06509 | 6.11905  | 0.0127789   | 0.9406   | 0.967884    | no  |
| Zfp82   | 5.83742 | 5.76924  | -0.0169485  | 0.9297   | 0.961579    | no  |
| Zfp821  | 4.98791 | 5.67654  | 0.186576    | 0.3446   | 0.501444    | no  |
| Zfp825  | 12.7789 | 11.952   | -0.0965072  | 0.60265  | 0.741838    | no  |
| Zfp827  | 2.12393 | 2.90466  | 0.45163     | 0.0107   | 0.0290897   | yes |
| Zfp830  | 7.86615 | 7.57574  | -0.05427    | 0.74945  | 0.850295    | no  |
| Zfp831  | 6.13957 | 4.51506  | -0.443391   | 0.0039   | 0.0120284   | yes |
| Zfp839  | 6.794   | 7.82526  | 0.203878    | 0.21565  | 0.35608     | no  |
| Zfp84   | 6.55256 | 6.1576   | -0.0896898  | 0.56255  | 0.708503    | no  |
| Zfp846  | 3.40063 | 3.46347  | 0.0264159   | 0.90095  | 0.945139    | no  |
| Zfp85   | 3.5009  | 3.31759  | -0.0775926  | 0.7271   | 0.834692    | no  |
| Zfp850  | 1.9643  | 2.18473  | 0.153442    | 0.4082   | 0.567079    | no  |
| Zfp865  | 13.9315 | 15.152   | 0.121162    | 0.41895  | 0.577602    | no  |
| Zfp866  | 4.14485 | 4.03331  | -0.039355   | 0.8129   | 0.891792    | no  |

|          |          |         |             |         |            |     |
|----------|----------|---------|-------------|---------|------------|-----|
| Zfp867   | 1.31642  | 1.37277 | 0.0604728   | 0.81025 | 0.890227   | no  |
| Zfp868   | 14.5967  | 13.3815 | -0.125402   | 0.4306  | 0.58889    | no  |
| Zfp869   | 17.5458  | 18.9684 | 0.112472    | 0.4588  | 0.616244   | no  |
| Zfp87    | 8.34374  | 7.08924 | -0.235064   | 0.17445 | 0.301561   | no  |
| Zfp871   | 15.3135  | 15.2474 | -0.00624413 | 0.9662  | 0.981581   | no  |
| Zfp873   | 2.41138  | 1.68675 | -0.515616   | 0.04605 | 0.10148    | no  |
| Zfp874a  | 5.03602  | 5.00061 | -0.010178   | 0.9546  | 0.975709   | no  |
| Zfp874b  | 3.54677  | 3.3746  | -0.0717889  | 0.7021  | 0.817251   | no  |
| Zfp882   | 1.25198  | 1.28697 | 0.0397666   | 0.85855 | 0.92005    | no  |
| Zfp90    | 2.48423  | 2.3676  | -0.069376   | 0.7629  | 0.859133   | no  |
| Zfp91    | 34.2786  | 32.6393 | -0.0706981  | 0.62015 | 0.755957   | no  |
| Zfp930   | 5.63405  | 5.43104 | -0.0529458  | 0.76965 | 0.863675   | no  |
| Zfp931   | 0.954726 | 1.39002 | 0.541945    | 0.1229  | 0.228506   | no  |
| Zfp932   | 15.6283  | 14.4795 | -0.11015    | 0.4982  | 0.65255    | no  |
| Zfp933   | 1.96062  | 1.88586 | -0.0560848  | 0.7923  | 0.878781   | no  |
| Zfp934   | 1.26042  | 1.00469 | -0.327161   | 0.2934  | 0.444747   | no  |
| Zfp935   | 9.24606  | 7.64818 | -0.273724   | 0.1133  | 0.213976   | no  |
| Zfp938   | 1.86253  | 2.25337 | 0.274819    | 0.301   | 0.453424   | no  |
| Zfp94    | 1.17716  | 1.44317 | 0.293925    | 0.3023  | 0.454858   | no  |
| Zfp940   | 2.25589  | 2.29128 | 0.0224569   | 0.9212  | 0.957136   | no  |
| Zfp942   | 15.3066  | 15.8797 | 0.0530248   | 0.7309  | 0.837351   | no  |
| Zfp943   | 9.53715  | 8.63852 | -0.142774   | 0.3896  | 0.548735   | no  |
| Zfp944   | 7.91236  | 8.56252 | 0.113927    | 0.4945  | 0.649197   | no  |
| Zfp945   | 3.2901   | 3.4162  | 0.0542612   | 0.7452  | 0.847366   | no  |
| Zfp946   | 0.882768 | 1.3591  | 0.622547    | 0.03325 | 0.0769788  | no  |
| Zfp948   | 3.62576  | 2.90591 | -0.319295   | 0.1381  | 0.250474   | no  |
| Zfp949   | 5.83985  | 6.15065 | 0.074807    | 0.66205 | 0.788579   | no  |
| Zfp951   | 3.49067  | 2.41489 | -0.531546   | 0.0139  | 0.0363906  | yes |
| Zfp952   | 9.17143  | 7.91364 | -0.212805   | 0.1947  | 0.329181   | no  |
| Zfp953   | 3.31007  | 2.92411 | -0.178862   | 0.33065 | 0.486298   | no  |
| Zfp954   | 15.3925  | 14.5319 | -0.0830023  | 0.6073  | 0.745534   | no  |
| Zfp955a  | 5.208    | 4.84041 | -0.1056     | 0.54345 | 0.692504   | no  |
| Zfp955b  | 4.61216  | 4.82739 | 0.0658003   | 0.7136  | 0.825504   | no  |
| Zfp956   | 7.59073  | 9.24633 | 0.284642    | 0.11655 | 0.219042   | no  |
| Zfp958   | 5.50676  | 5.72629 | 0.0563967   | 0.7652  | 0.860707   | no  |
| Zfp959   | 6.48157  | 6.17539 | -0.0698131  | 0.7119  | 0.824281   | no  |
| Zfp961   | 8.27035  | 8.28146 | 0.00193772  | 0.99305 | 0.995674   | no  |
| Zfp963   | 2.18858  | 2.38338 | 0.123011    | 0.62505 | 0.759817   | no  |
| Zfp97    | 1.74152  | 1.88494 | 0.114175    | 0.6475  | 0.777348   | no  |
| Zfpl1    | 22.5839  | 20.1265 | -0.166201   | 0.32205 | 0.476989   | no  |
| Zfpm1    | 22.2242  | 24.3612 | 0.132456    | 0.35925 | 0.517165   | no  |
| Zfr      | 20.3473  | 19.5743 | -0.0558757  | 0.69835 | 0.814928   | no  |
| Zfx      | 11.3817  | 11.1892 | -0.0246039  | 0.8659  | 0.924376   | no  |
| Zfyve1   | 11.4826  | 11.5895 | 0.0133672   | 0.92785 | 0.960632   | no  |
| Zfyve16  | 3.40384  | 3.34507 | -0.0251267  | 0.88635 | 0.936364   | no  |
| Zfyve19  | 13.5958  | 12.4517 | -0.126811   | 0.51075 | 0.664022   | no  |
| Zfyve20  | 9.69465  | 9.50826 | -0.0280077  | 0.8551  | 0.917912   | no  |
| Zfyve21  | 1.6153   | 1.93676 | 0.26184     | 0.44015 | 0.598149   | no  |
| Zfyve26  | 5.78348  | 6.46041 | 0.159689    | 0.28175 | 0.431602   | no  |
| Zfyve27  | 11.5234  | 11.8264 | 0.0374497   | 0.79705 | 0.881874   | no  |
| Zgpat    | 67.8523  | 72.5083 | 0.0957492   | 0.59875 | 0.738738   | no  |
| Zgrf1    | 1.73136  | 1.11369 | -0.636548   | 0.0016  | 0.00547227 | yes |
| Zhx1     | 13.4756  | 12.7307 | -0.0820346  | 0.5771  | 0.720757   | no  |
| Zhx2     | 5.40107  | 7.29298 | 0.433262    | 0.0093  | 0.0257386  | yes |
| Zhx3     | 1.35221  | 1.54894 | 0.195969    | 0.88685 | 0.936612   | no  |
| Zkscan1  | 3.37904  | 3.93284 | 0.21896     | 0.17165 | 0.297807   | no  |
| Zkscan14 | 8.12268  | 7.74348 | -0.0689737  | 0.7058  | 0.820029   | no  |

|          |         |         |             |         |           |     |
|----------|---------|---------|-------------|---------|-----------|-----|
| Zkscan17 | 11.9116 | 10.8697 | -0.132058   | 0.41835 | 0.576932  | no  |
| Zkscan3  | 21.4329 | 24.0304 | 0.165036    | 0.2711  | 0.419034  | no  |
| Zkscan5  | 2.96927 | 3.2589  | 0.134273    | 0.4833  | 0.638819  | no  |
| Zkscan6  | 14.0743 | 14.1639 | 0.00915912  | 0.95505 | 0.975999  | no  |
| Zkscan7  | 2.38018 | 3.27053 | 0.458455    | 0.05375 | 0.115565  | no  |
| Zkscan8  | 2.02372 | 2.71095 | 0.421785    | 0.06015 | 0.127164  | no  |
| Zmat2    | 47.2368 | 44.6381 | -0.0816346  | 0.5686  | 0.713462  | no  |
| Zmat3    | 3.6406  | 4.21249 | 0.210498    | 0.1865  | 0.318229  | no  |
| Zmat5    | 54.2427 | 53.9913 | -0.00670155 | 0.96555 | 0.981203  | no  |
| Zmiz1    | 40.1242 | 33.3733 | -0.26578    | 0.0569  | 0.121351  | no  |
| Zmiz2    | 41.0857 | 44.9479 | 0.129617    | 0.36165 | 0.519824  | no  |
| Zmpste24 | 19.5287 | 20.3561 | 0.0598612   | 0.68635 | 0.806378  | no  |
| Zmym1    | 5.08208 | 4.95797 | -0.0356679  | 0.83405 | 0.904896  | no  |
| Zmym2    | 12.5226 | 13.6939 | 0.128993    | 0.3722  | 0.530838  | no  |
| Zmym3    | 9.57132 | 9.13094 | -0.0679559  | 0.7095  | 0.822649  | no  |
| Zmym4    | 3.23624 | 3.25785 | 0.00960238  | 0.9764  | 0.986943  | no  |
| Zmym5    | 13.3046 | 13.7494 | 0.047437    | 0.7454  | 0.847498  | no  |
| Zmym6    | 7.72622 | 9.73611 | 0.333582    | 0.0319  | 0.0743238 | no  |
| Zmynd11  | 38.5749 | 38.8456 | 0.0100878   | 0.94425 | 0.969778  | no  |
| Zmynd19  | 12.3227 | 11.5991 | -0.0873081  | 0.64495 | 0.775434  | no  |
| Zmynd8   | 21.7313 | 22.0892 | 0.0235725   | 0.8788  | 0.932239  | no  |
| Znf512b  | 7.60322 | 8.45324 | 0.152894    | 0.51185 | 0.664987  | no  |
| Znfx1    | 16.0239 | 14.9209 | -0.102898   | 0.5757  | 0.719594  | no  |
| Znhit1   | 14.5897 | 16.0968 | 0.141823    | 0.5566  | 0.70352   | no  |
| Znhit2   | 19.4813 | 23.2945 | 0.257897    | 0.12675 | 0.234257  | no  |
| Znhit3   | 12.7374 | 9.38944 | -0.439958   | 0.12695 | 0.234553  | no  |
| Znhit6   | 5.68032 | 6.30809 | 0.151231    | 0.39885 | 0.557878  | no  |
| Znrd1    | 40.339  | 37.8008 | -0.0937577  | 0.58325 | 0.72601   | no  |
| Znrd1as  | 2.48212 | 3.25056 | 0.389114    | 0.22815 | 0.371223  | no  |
| Znrf1    | 14.61   | 17.0715 | 0.22464     | 0.12195 | 0.227092  | no  |
| Znrf2    | 91.8077 | 96.9686 | 0.0789032   | 0.5773  | 0.720943  | no  |
| Znrf3    | 5.11607 | 4.5595  | -0.166159   | 0.28965 | 0.440539  | no  |
| Zpbp2    | 3.94044 | 3.07562 | -0.35748    | 0.16735 | 0.291983  | no  |
| Zranb1   | 13.3762 | 13.7196 | 0.0365738   | 0.82175 | 0.897384  | no  |
| Zranb2   | 26.4927 | 22.0019 | -0.267964   | 0.07195 | 0.14714   | no  |
| Zranb3   | 1.96419 | 1.53632 | -0.354453   | 0.10565 | 0.20213   | no  |
| Zrsr1    | 5.20809 | 5.69011 | 0.127703    | 0.57905 | 0.722438  | no  |
| Zrsr2    | 14.9515 | 15.7874 | 0.0784836   | 0.6098  | 0.747523  | no  |
| Zscan12  | 1.11573 | 1.82421 | 0.70928     | 0.0037  | 0.0114853 | yes |
| Zscan2   | 3.78335 | 4.1444  | 0.131501    | 0.52255 | 0.674419  | no  |
| Zscan20  | 3.40522 | 3.29899 | -0.045723   | 0.7951  | 0.880655  | no  |
| Zscan21  | 7.2027  | 7.59736 | 0.0769591   | 0.663   | 0.789244  | no  |
| Zscan22  | 3.47396 | 3.32758 | -0.0621097  | 0.75515 | 0.853866  | no  |
| Zscan25  | 11.3683 | 13.0806 | 0.202415    | 0.2286  | 0.37169   | no  |
| Zscan26  | 14.2154 | 16.3794 | 0.204429    | 0.168   | 0.29272   | no  |
| Zscan29  | 14.7033 | 14.9211 | 0.021209    | 0.8999  | 0.944627  | no  |
| Zswim1   | 6.6295  | 7.12956 | 0.104914    | 0.5476  | 0.695882  | no  |
| Zswim3   | 2.50783 | 2.24102 | -0.162282   | 0.4853  | 0.640587  | no  |
| Zswim4   | 4.9201  | 5.65759 | 0.201499    | 0.2376  | 0.382325  | no  |
| Zswim6   | 12.3958 | 11.5285 | -0.104636   | 0.4733  | 0.629752  | no  |
| Zswim7   | 4.28325 | 4.10684 | -0.0606765  | 0.8485  | 0.913538  | no  |
| Zswim8   | 33.8441 | 34.1688 | 0.013773    | 0.9207  | 0.956856  | no  |
| Zufsp    | 14.2978 | 14.0028 | -0.030082   | 0.8496  | 0.914179  | no  |
| Zw10     | 25.7052 | 24.4604 | -0.0716102  | 0.6254  | 0.760099  | no  |
| Zwilch   | 5.81728 | 3.95178 | -0.557843   | 0.0038  | 0.0117554 | yes |
| Zwint    | 15.6226 | 15.1337 | -0.0458631  | 0.7706  | 0.864343  | no  |
| Zxdb     | 1.82413 | 1.76329 | -0.0489349  | 0.8033  | 0.885887  | no  |

|        |         |         |            |         |          |    |
|--------|---------|---------|------------|---------|----------|----|
| Zxdc   | 8.86526 | 9.54229 | 0.106172   | 0.48535 | 0.640641 | no |
| Zyg11b | 13.6223 | 14.9269 | 0.131948   | 0.35365 | 0.511209 | no |
| Zyx    | 392.687 | 386.785 | -0.0218485 | 0.88675 | 0.936576 | no |
| Zzef1  | 16.7379 | 16.5973 | -0.0121636 | 0.9304  | 0.961965 | no |
| Zzz3   | 11.4213 | 11.8827 | 0.057142   | 0.68735 | 0.807083 | no |

Supplemental Table S2. Expressed genes and FPKM values for WT and miR-150<sup>-/-</sup>(KO) effector CD8<sup>+</sup> T cells.
